# Supplementary material for: Shifting epigenetic contexts influence regulatory variation and disease risk
Source: Aging (Albany NY). 2021 Jun 16;13(12):15699–749. doi: 10.18632/aging.203194 (PMC8266365; doi:10.18632/aging.203194)
Supplement: Supplementary Table 1 [file aging-13-203194-s003.xls]

## Sheet: Sample_Metadata
Supplementary Table 1. Region Set Characterization.
File.accession	File.format	Assay	Assembly	Lab	Biosample.term.name	Output.type	File.Status	Experiment.accession	type	simplified	AGE_CLASS	KEY	AGE
ENCFF970LXV	bam	DNase-seq	hg19	ENCODE Processing Pipeline	adrenal gland	alignments	released	ENCSR597NVK	adult	adrenal_gland	OLD	adrenal gland tissue female adult (53 years)	53
ENCFF430AHU	bam	DNase-seq	hg19	ENCODE Processing Pipeline	adrenal gland	alignments	released	ENCSR848XIY	adult	adrenal_gland	OLD	adrenal gland tissue male adult (54 years)	54
ENCFF349QPC	bam	DNase-seq	hg19	ENCODE Processing Pipeline	adrenal gland	alignments	released	ENCSR060BFU	embryo	adrenal_gland	NA	NA	NA
ENCFF667MRJ	bam	DNase-seq	hg19	ENCODE Processing Pipeline	adrenal gland	alignments	released	ENCSR728BAD	embryo	adrenal_gland	NA	NA	NA
ENCFF343CEI	bam	DNase-seq	hg19	ENCODE Processing Pipeline	adrenal gland	alignments	released	ENCSR856QJX	embryo	adrenal_gland	NA	NA	NA
ENCFF852QUY	bam	DNase-seq	hg19	ENCODE Processing Pipeline	adrenal gland	alignments	released	ENCSR419MZH	embryo	adrenal_gland	NA	NA	NA
ENCFF746WUF	bam	DNase-seq	hg19	ENCODE Processing Pipeline	adrenal gland	alignments	released	ENCSR696XSJ	embryo	adrenal_gland	NA	NA	NA
ENCFF008VCJ	bam	DNase-seq	hg19	ENCODE Processing Pipeline	adrenal gland	alignments	released	ENCSR866RCY	embryo	adrenal_gland	NA	NA	NA
ENCFF890JQE	bam	DNase-seq	hg19	ENCODE Processing Pipeline	adrenal gland	alignments	released	ENCSR080PZL	embryo	adrenal_gland	NA	NA	NA
ENCFF013YIZ	bam	DNase-seq	hg19	ENCODE Processing Pipeline	frontal cortex	alignments	released	ENCSR000EIY	adult	brain	OLD	frontal cortex tissue female adult (67 years) and female adult (80 years)
ENCFF333DJM	bam	DNase-seq	hg19	ENCODE Processing Pipeline	frontal cortex	alignments	released	ENCSR000EIY	adult	brain	OLD	frontal cortex tissue female adult (67 years) and female adult (80 years)
ENCFF376UBI	bam	DNase-seq	hg19	ENCODE Processing Pipeline	frontal cortex	alignments	released	ENCSR000EIK	adult	brain	YOUNG	frontal cortex tissue male adult (27 years) and male adult (35 years)
ENCFF780XDM	bam	DNase-seq	hg19	ENCODE Processing Pipeline	frontal cortex	alignments	released	ENCSR000EIK	adult	brain	YOUNG	frontal cortex tissue male adult (27 years) and male adult (35 years)
ENCFF073GNU	bam	DNase-seq	hg19	ENCODE Processing Pipeline	occipital lobe	alignments	released	ENCSR859CZM	adult	brain	OLD	occipital lobe tissue male adult (84 years)	84
ENCFF174VNL	bam	DNase-seq	hg19	ENCODE Processing Pipeline	cerebellum	alignments	released	ENCSR000EIJ	adult	brain	YOUNG	cerebellum tissue male adult (27 years) and male adult (35 years)
ENCFF761IPU	bam	DNase-seq	hg19	ENCODE Processing Pipeline	cerebellum	alignments	released	ENCSR000EIJ	adult	brain	YOUNG	cerebellum tissue male adult (27 years) and male adult (35 years)
ENCFF244IRQ	bam	DNase-seq	hg19	ENCODE Processing Pipeline	right lobe of liver	alignments	released	ENCSR555QAY	adult	brain	OLD	right lobe of liver tissue female adult (53 years)	53
ENCFF542NTO	bam	DNase-seq	hg19	ENCODE Processing Pipeline	brain	alignments	released	ENCSR118WIQ	embryo	brain	NA	NA	NA
ENCFF846NFV	bam	DNase-seq	hg19	ENCODE Processing Pipeline	brain	alignments	released	ENCSR187PYY	embryo	brain	NA	NA	NA
ENCFF848SVJ	bam	DNase-seq	hg19	ENCODE Processing Pipeline	brain	alignments	released	ENCSR820XRX	embryo	brain	NA	NA	NA
ENCFF542AQF	bam	DNase-seq	hg19	ENCODE Processing Pipeline	brain	alignments	released	ENCSR572LDG	embryo	brain	NA	NA	NA
ENCFF602FMG	bam	DNase-seq	hg19	ENCODE Processing Pipeline	brain	alignments	released	ENCSR026EOM	embryo	brain	NA	NA	NA
ENCFF537DKA	bam	DNase-seq	hg19	ENCODE Processing Pipeline	brain	alignments	released	ENCSR649KBB	embryo	brain	NA	NA	NA
ENCFF948DOQ	bam	DNase-seq	hg19	ENCODE Processing Pipeline	brain	alignments	released	ENCSR156CLC	embryo	brain	NA	NA	NA
ENCFF108NTA	bam	DNase-seq	hg19	ENCODE Processing Pipeline	brain	alignments	released	ENCSR344FLH	embryo	brain	NA	NA	NA
ENCFF431RLT	bam	DNase-seq	hg19	ENCODE Processing Pipeline	brain	alignments	released	ENCSR309FOO	embryo	brain	NA	NA	NA
ENCFF129ZBZ	bam	DNase-seq	hg19	ENCODE Processing Pipeline	brain	alignments	released	ENCSR507GFJ	embryo	brain	NA	NA	NA
ENCFF952QLZ	bam	DNase-seq	hg19	ENCODE Processing Pipeline	brain	alignments	released	ENCSR947POC	embryo	brain	NA	NA	NA
ENCFF436NOR	bam	DNase-seq	hg19	ENCODE Processing Pipeline	brain	alignments	released	ENCSR475VQD	embryo	brain	NA	NA	NA
ENCFF808BII	bam	DNase-seq	hg19	ENCODE Processing Pipeline	brain	alignments	released	ENCSR475VQD	embryo	brain	NA	NA	NA
ENCFF807SCV	bam	DNase-seq	hg19	ENCODE Processing Pipeline	brain	alignments	released	ENCSR595CSH	embryo	brain	NA	NA	NA
ENCFF196CDZ	bam	DNase-seq	hg19	ENCODE Processing Pipeline	brain	alignments	released	ENCSR595CSH	embryo	brain	NA	NA	NA
ENCFF019NIR	bam	DNase-seq	hg19	ENCODE Processing Pipeline	brain	alignments	released	ENCSR420RWU	embryo	brain	NA	NA	NA
ENCFF185ISK	bam	DNase-seq	hg19	ENCODE Processing Pipeline	heart	alignments	released	ENCSR000EJQ	adult	heart	YOUNG	heart tissue male adult (27 years) and male adult (35 years)
ENCFF389CBD	bam	DNase-seq	hg19	ENCODE Processing Pipeline	heart	alignments	released	ENCSR000EJQ	adult	heart	YOUNG	heart tissue male adult (27 years) and male adult (35 years)
ENCFF124CNO	bam	DNase-seq	hg19	ENCODE Processing Pipeline	ascending aorta	alignments	released	ENCSR852TRT	adult	heart	OLD	ascending aorta tissue female adult (51 years)	51
ENCFF513LVE	bam	DNase-seq	hg19	ENCODE Processing Pipeline	right atrium auricular region	alignments	released	ENCSR278SKG	adult	heart	OLD	right atrium auricular region tissue female adult (51 years)	51
ENCFF939RTU	bam	DNase-seq	hg19	ENCODE Processing Pipeline	right atrium auricular region	alignments	released	ENCSR777DXQ	adult	heart	OLD	right atrium auricular region tissue female adult (53 years)	53
ENCFF702IJE	bam	DNase-seq	hg19	ENCODE Processing Pipeline	heart left ventricle	alignments	released	ENCSR070CMW	adult	heart	OLD	heart left ventricle tissue female adult (53 years)	53
ENCFF376OPD	bam	DNase-seq	hg19	ENCODE Processing Pipeline	heart	alignments	released	ENCSR064GBK	embryo	heart	NA	NA	NA
ENCFF562IIU	bam	DNase-seq	hg19	ENCODE Processing Pipeline	heart	alignments	released	ENCSR154ZNQ	embryo	heart	NA	NA	NA
ENCFF544SGF	bam	DNase-seq	hg19	ENCODE Processing Pipeline	heart	alignments	released	ENCSR911LTI	embryo	heart	NA	NA	NA
ENCFF152KTS	bam	DNase-seq	hg19	ENCODE Processing Pipeline	heart left ventricle	alignments	released	ENCSR501FWC	embryo	heart	NA	NA	NA
ENCFF900LLD	bam	DNase-seq	hg19	ENCODE Processing Pipeline	heart	alignments	released	ENCSR366EGE	embryo	heart	NA	NA	NA
ENCFF124QRT	bam	DNase-seq	hg19	ENCODE Processing Pipeline	heart	alignments	released	ENCSR914DOH	embryo	heart	NA	NA	NA
ENCFF352BKQ	bam	DNase-seq	hg19	ENCODE Processing Pipeline	heart	alignments	released	ENCSR664PKM	embryo	heart	NA	NA	NA
ENCFF813XJE	bam	DNase-seq	hg19	ENCODE Processing Pipeline	heart	alignments	released	ENCSR664PKM	embryo	heart	NA	NA	NA
ENCFF774DEI	bam	DNase-seq	hg19	ENCODE Processing Pipeline	heart	alignments	released	ENCSR533VAF	embryo	heart	NA	NA	NA
ENCFF431JSL	bam	DNase-seq	hg19	ENCODE Processing Pipeline	heart	alignments	released	ENCSR320PGJ	embryo	heart	NA	NA	NA
ENCFF594WQM	bam	DNase-seq	hg19	ENCODE Processing Pipeline	heart	alignments	released	ENCSR804RSI	embryo	heart	NA	NA	NA
ENCFF706ECO	bam	DNase-seq	hg19	ENCODE Processing Pipeline	heart	alignments	released	ENCSR189YJQ	embryo	heart	NA	NA	NA
ENCFF280OVS	bam	DNase-seq	hg19	ENCODE Processing Pipeline	heart	alignments	released	ENCSR392GCE	embryo	heart	NA	NA	NA
ENCFF523OSH	bam	DNase-seq	hg19	ENCODE Processing Pipeline	heart	alignments	released	ENCSR311LLZ	embryo	heart	NA	NA	NA
ENCFF934CDN	bam	DNase-seq	hg19	ENCODE Processing Pipeline	heart	alignments	released	ENCSR536NGW	embryo	heart	NA	NA	NA
ENCFF987PLB	bam	DNase-seq	hg19	ENCODE Processing Pipeline	heart	alignments	released	ENCSR174JMM	embryo	heart	NA	NA	NA
ENCFF496KEC	bam	DNase-seq	hg19	ENCODE Processing Pipeline	heart left ventricle	alignments	released	ENCSR946DXB	embryo	heart	NA	NA	NA
ENCFF870CEG	bam	DNase-seq	hg19	ENCODE Processing Pipeline	heart left ventricle	alignments	released	ENCSR946DXB	embryo	heart	NA	NA	NA
ENCFF566BGJ	bam	DNase-seq	hg19	ENCODE Processing Pipeline	heart right ventricle	alignments	released	ENCSR746RDJ	embryo	heart	NA	NA	NA
ENCFF519UYK	bam	DNase-seq	hg19	ENCODE Processing Pipeline	heart right ventricle	alignments	released	ENCSR746RDJ	embryo	heart	NA	NA	NA
ENCFF968VWA	bam	DNase-seq	hg19	ENCODE Processing Pipeline	left cardiac atrium	alignments	released	ENCSR412NMI	embryo	heart	NA	NA	NA
ENCFF022PJN	bam	DNase-seq	hg19	ENCODE Processing Pipeline	upper lobe of left lung	alignments	released	ENCSR164WOF	adult	lung	YOUNG	upper lobe of left lung tissue male adult (37 years)	37
ENCFF803ZER	bam	DNase-seq	hg19	ENCODE Processing Pipeline	upper lobe of left lung	alignments	released	ENCSR820WNB	adult	lung	OLD	upper lobe of left lung tissue female adult (53 years)	53
ENCFF985OXZ	bam	DNase-seq	hg19	ENCODE Processing Pipeline	upper lobe of left lung	alignments	released	ENCSR490JVQ	adult	lung	OLD	upper lobe of left lung tissue female adult (51 years)	51
ENCFF767PZY	bam	DNase-seq	hg19	ENCODE Processing Pipeline	lung	alignments	released	ENCSR986XLW	embryo	lung	NA	NA	NA
ENCFF113AJV	bam	DNase-seq	hg19	ENCODE Processing Pipeline	left lung	alignments	released	ENCSR803VCR	embryo	lung	NA	NA	NA
ENCFF333ZXH	bam	DNase-seq	hg19	ENCODE Processing Pipeline	left lung	alignments	released	ENCSR468OVW	embryo	lung	NA	NA	NA
ENCFF221DVC	bam	DNase-seq	hg19	ENCODE Processing Pipeline	left lung	alignments	released	ENCSR680SDS	embryo	lung	NA	NA	NA
ENCFF324KEB	bam	DNase-seq	hg19	ENCODE Processing Pipeline	right lung	alignments	released	ENCSR263IGU	embryo	lung	NA	NA	NA
ENCFF159KZC	bam	DNase-seq	hg19	ENCODE Processing Pipeline	left lung	alignments	released	ENCSR510ITB	embryo	lung	NA	NA	NA
ENCFF746QTI	bam	DNase-seq	hg19	ENCODE Processing Pipeline	left lung	alignments	released	ENCSR456KDF	embryo	lung	NA	NA	NA
ENCFF969UDM	bam	DNase-seq	hg19	ENCODE Processing Pipeline	left lung	alignments	released	ENCSR953WJO	embryo	lung	NA	NA	NA
ENCFF615FRI	bam	DNase-seq	hg19	ENCODE Processing Pipeline	lung	alignments	released	ENCSR318WOD	embryo	lung	NA	NA	NA
ENCFF584WDA	bam	DNase-seq	hg19	ENCODE Processing Pipeline	right lung	alignments	released	ENCSR299INS	embryo	lung	NA	NA	NA
ENCFF890KBJ	bam	DNase-seq	hg19	ENCODE Processing Pipeline	lung	alignments	released	ENCSR482HQE	embryo	lung	NA	NA	NA
ENCFF949LCP	bam	DNase-seq	hg19	ENCODE Processing Pipeline	lung	alignments	released	ENCSR847RSJ	embryo	lung	NA	NA	NA
ENCFF717FJE	bam	DNase-seq	hg19	ENCODE Processing Pipeline	lung	alignments	released	ENCSR141VGA	embryo	lung	NA	NA	NA
ENCFF661IGM	bam	DNase-seq	hg19	ENCODE Processing Pipeline	left lung	alignments	released	ENCSR935EVZ	embryo	lung	NA	NA	NA
ENCFF085XYO	bam	DNase-seq	hg19	ENCODE Processing Pipeline	right lung	alignments	released	ENCSR445XYW	embryo	lung	NA	NA	NA
ENCFF374BUY	bam	DNase-seq	hg19	ENCODE Processing Pipeline	left lung	alignments	released	ENCSR541AVF	embryo	lung	NA	NA	NA
ENCFF682DZN	bam	DNase-seq	hg19	ENCODE Processing Pipeline	right lung	alignments	released	ENCSR947VPG	embryo	lung	NA	NA	NA
ENCFF215BUS	bam	DNase-seq	hg19	ENCODE Processing Pipeline	left lung	alignments	released	ENCSR441OGH	embryo	lung	NA	NA	NA
ENCFF121ZBR	bam	DNase-seq	hg19	ENCODE Processing Pipeline	lung	alignments	released	ENCSR076YBB	embryo	lung	NA	NA	NA
ENCFF285BSG	bam	DNase-seq	hg19	ENCODE Processing Pipeline	right lung	alignments	released	ENCSR846CTA	embryo	lung	NA	NA	NA
ENCFF961FZQ	bam	DNase-seq	hg19	ENCODE Processing Pipeline	left lung	alignments	released	ENCSR006XED	embryo	lung	NA	NA	NA
ENCFF698LQU	bam	DNase-seq	hg19	ENCODE Processing Pipeline	right lung	alignments	released	ENCSR930AUG	embryo	lung	NA	NA	NA
ENCFF654DRD	bam	DNase-seq	hg19	ENCODE Processing Pipeline	lung	alignments	released	ENCSR214XJO	embryo	lung	NA	NA	NA
ENCFF859ERU	bam	DNase-seq	hg19	ENCODE Processing Pipeline	right lung	alignments	released	ENCSR964VVW	embryo	lung	NA	NA	NA
ENCFF663KHG	bam	DNase-seq	hg19	ENCODE Processing Pipeline	right lung	alignments	released	ENCSR845MEJ	embryo	lung	NA	NA	NA
ENCFF630SFP	bam	DNase-seq	hg19	ENCODE Processing Pipeline	right lung	alignments	released	ENCSR859KGQ	embryo	lung	NA	NA	NA
ENCFF565CIZ	bam	DNase-seq	hg19	ENCODE Processing Pipeline	left lung	alignments	released	ENCSR960EJV	embryo	lung	NA	NA	NA
ENCFF232UOO	bam	DNase-seq	hg19	ENCODE Processing Pipeline	lung	alignments	released	ENCSR587HPR	embryo	lung	NA	NA	NA
ENCFF935OOV	bam	DNase-seq	hg19	ENCODE Processing Pipeline	right lung	alignments	released	ENCSR441MMO	embryo	lung	NA	NA	NA
ENCFF119VPN	bam	DNase-seq	hg19	ENCODE Processing Pipeline	lung	alignments	released	ENCSR504KZE	embryo	lung	NA	NA	NA
ENCFF337MIR	bam	DNase-seq	hg19	ENCODE Processing Pipeline	right lung	alignments	released	ENCSR228BOM	embryo	lung	NA	NA	NA
ENCFF611AGL	bam	DNase-seq	hg19	ENCODE Processing Pipeline	lung	alignments	released	ENCSR006IJP	embryo	lung	NA	NA	NA
ENCFF054IPB	bam	DNase-seq	hg19	ENCODE Processing Pipeline	left lung	alignments	released	ENCSR488PHT	embryo	lung	NA	NA	NA
ENCFF308HJB	bam	DNase-seq	hg19	ENCODE Processing Pipeline	left lung	alignments	released	ENCSR639XWF	embryo	lung	NA	NA	NA
ENCFF817QEH	bam	DNase-seq	hg19	ENCODE Processing Pipeline	lung	alignments	released	ENCSR141IUS	embryo	lung	NA	NA	NA
ENCFF635UOX	bam	DNase-seq	hg19	ENCODE Processing Pipeline	lung	alignments	released	ENCSR627NIF	embryo	lung	NA	NA	NA
ENCFF186BCI	bam	DNase-seq	hg19	ENCODE Processing Pipeline	lung	alignments	released	ENCSR627NIF	embryo	lung	NA	NA	NA
ENCFF020GHN	bam	DNase-seq	hg19	ENCODE Processing Pipeline	lung	alignments	released	ENCSR582IPV	embryo	lung	NA	NA	NA
ENCFF658ZEV	bam	DNase-seq	hg19	ENCODE Processing Pipeline	lung	alignments	released	ENCSR582IPV	embryo	lung	NA	NA	NA
ENCFF502LIU	bam	DNase-seq	hg19	ENCODE Processing Pipeline	psoas muscle	alignments	released	ENCSR000ELO	adult	muscle	YOUNG	psoas muscle tissue male adult (27 years) and male adult (35 years)
ENCFF612IRW	bam	DNase-seq	hg19	ENCODE Processing Pipeline	psoas muscle	alignments	released	ENCSR000ELO	adult	muscle	YOUNG	psoas muscle tissue male adult (27 years) and male adult (35 years)
ENCFF508WVY	bam	DNase-seq	hg19	ENCODE Processing Pipeline	gastrocnemius medialis	alignments	released	ENCSR236SFP	adult	muscle	OLD	gastrocnemius medialis tissue female adult (51 years)	51
ENCFF672LIO	bam	DNase-seq	hg19	ENCODE Processing Pipeline	muscle of back	alignments	released	ENCSR010ZMK	embryo	muscle	NA	NA	NA
ENCFF951KSP	bam	DNase-seq	hg19	ENCODE Processing Pipeline	muscle of back	alignments	released	ENCSR357RED	embryo	muscle	NA	NA	NA
ENCFF833XQA	bam	DNase-seq	hg19	ENCODE Processing Pipeline	muscle of arm	alignments	released	ENCSR309YDN	embryo	muscle	NA	NA	NA
ENCFF151PSG	bam	DNase-seq	hg19	ENCODE Processing Pipeline	muscle of arm	alignments	released	ENCSR826ERZ	embryo	muscle	NA	NA	NA
ENCFF032KCG	bam	DNase-seq	hg19	ENCODE Processing Pipeline	muscle of arm	alignments	released	ENCSR270LZE	embryo	muscle	NA	NA	NA
ENCFF959RWP	bam	DNase-seq	hg19	ENCODE Processing Pipeline	muscle of arm	alignments	released	ENCSR517NHP	embryo	muscle	NA	NA	NA
ENCFF678XNA	bam	DNase-seq	hg19	ENCODE Processing Pipeline	muscle of leg	alignments	released	ENCSR622CAH	embryo	muscle	NA	NA	NA
ENCFF429OVI	bam	DNase-seq	hg19	ENCODE Processing Pipeline	muscle of back	alignments	released	ENCSR698CUE	embryo	muscle	NA	NA	NA
ENCFF663QIV	bam	DNase-seq	hg19	ENCODE Processing Pipeline	muscle of leg	alignments	released	ENCSR514QHN	embryo	muscle	NA	NA	NA
ENCFF245HUN	bam	DNase-seq	hg19	ENCODE Processing Pipeline	muscle of leg	alignments	released	ENCSR938UOR	embryo	muscle	NA	NA	NA
ENCFF799LOQ	bam	DNase-seq	hg19	ENCODE Processing Pipeline	muscle of arm	alignments	released	ENCSR619BNL	embryo	muscle	NA	NA	NA
ENCFF922HOC	bam	DNase-seq	hg19	ENCODE Processing Pipeline	muscle of back	alignments	released	ENCSR174GXG	embryo	muscle	NA	NA	NA
ENCFF141FQR	bam	DNase-seq	hg19	ENCODE Processing Pipeline	muscle of arm	alignments	released	ENCSR949JYS	embryo	muscle	NA	NA	NA
ENCFF730UQK	bam	DNase-seq	hg19	ENCODE Processing Pipeline	muscle of back	alignments	released	ENCSR295ELC	embryo	muscle	NA	NA	NA
ENCFF156XGI	bam	DNase-seq	hg19	ENCODE Processing Pipeline	muscle of leg	alignments	released	ENCSR286WIA	embryo	muscle	NA	NA	NA
ENCFF269RUB	bam	DNase-seq	hg19	ENCODE Processing Pipeline	muscle of arm	alignments	released	ENCSR452EGE	embryo	muscle	NA	NA	NA
ENCFF248VBW	bam	DNase-seq	hg19	ENCODE Processing Pipeline	muscle of arm	alignments	released	ENCSR303YII	embryo	muscle	NA	NA	NA
ENCFF775QZL	bam	DNase-seq	hg19	ENCODE Processing Pipeline	muscle of back	alignments	released	ENCSR072NBR	embryo	muscle	NA	NA	NA
ENCFF412NAG	bam	DNase-seq	hg19	ENCODE Processing Pipeline	muscle of arm	alignments	released	ENCSR357PMV	embryo	muscle	NA	NA	NA
ENCFF065ECG	bam	DNase-seq	hg19	ENCODE Processing Pipeline	muscle of back	alignments	released	ENCSR438TWI	embryo	muscle	NA	NA	NA
ENCFF468GQN	bam	DNase-seq	hg19	ENCODE Processing Pipeline	muscle of back	alignments	released	ENCSR476SDZ	embryo	muscle	NA	NA	NA
ENCFF863QYT	bam	DNase-seq	hg19	ENCODE Processing Pipeline	muscle of trunk	alignments	released	ENCSR440FZS	embryo	muscle	NA	NA	NA
ENCFF339UWC	bam	DNase-seq	hg19	ENCODE Processing Pipeline	muscle of trunk	alignments	released	ENCSR411MGY	embryo	muscle	NA	NA	NA
ENCFF426BXR	bam	DNase-seq	hg19	ENCODE Processing Pipeline	muscle of back	alignments	released	ENCSR193LYA	embryo	muscle	NA	NA	NA
ENCFF108JUG	bam	DNase-seq	hg19	ENCODE Processing Pipeline	muscle of arm	alignments	released	ENCSR956NOL	embryo	muscle	NA	NA	NA
ENCFF989EMJ	bam	DNase-seq	hg19	ENCODE Processing Pipeline	muscle of arm	alignments	released	ENCSR753QKD	embryo	muscle	NA	NA	NA
ENCFF032YRW	bam	DNase-seq	hg19	ENCODE Processing Pipeline	muscle of leg	alignments	released	ENCSR272RQX	embryo	muscle	NA	NA	NA
ENCFF783EIR	bam	DNase-seq	hg19	ENCODE Processing Pipeline	muscle of leg	alignments	released	ENCSR297ORG	embryo	muscle	NA	NA	NA
ENCFF845MVQ	bam	DNase-seq	hg19	ENCODE Processing Pipeline	muscle of back	alignments	released	ENCSR786FWF	embryo	muscle	NA	NA	NA
ENCFF794BQM	bam	DNase-seq	hg19	ENCODE Processing Pipeline	muscle of leg	alignments	released	ENCSR167XSQ	embryo	muscle	NA	NA	NA
ENCFF904SUV	bam	DNase-seq	hg19	ENCODE Processing Pipeline	muscle of leg	alignments	released	ENCSR033DQS	embryo	muscle	NA	NA	NA
ENCFF014ZPA	bam	DNase-seq	hg19	ENCODE Processing Pipeline	muscle of leg	alignments	released	ENCSR198JXW	embryo	muscle	NA	NA	NA
ENCFF127ZSV	bam	DNase-seq	hg19	ENCODE Processing Pipeline	muscle of back	alignments	released	ENCSR141NSQ	embryo	muscle	NA	NA	NA
ENCFF559JLL	bam	DNase-seq	hg19	ENCODE Processing Pipeline	muscle of arm	alignments	released	ENCSR951XEN	embryo	muscle	NA	NA	NA
ENCFF574VDU	bam	DNase-seq	hg19	ENCODE Processing Pipeline	muscle of back	alignments	released	ENCSR106RBR	embryo	muscle	NA	NA	NA
ENCFF659MZH	bam	DNase-seq	hg19	ENCODE Processing Pipeline	muscle of leg	alignments	released	ENCSR059LXL	embryo	muscle	NA	NA	NA
ENCFF936FGG	bam	DNase-seq	hg19	ENCODE Processing Pipeline	hindlimb muscle	alignments	released	ENCSR385AMY	embryo	muscle	NA	NA	NA
ENCFF772QLS	bam	DNase-seq	hg19	ENCODE Processing Pipeline	muscle of arm	alignments	released	ENCSR062DXC	embryo	muscle	NA	NA	NA
ENCFF568IND	bam	DNase-seq	hg19	ENCODE Processing Pipeline	muscle of leg	alignments	released	ENCSR937RVN	embryo	muscle	NA	NA	NA
ENCFF110IZT	bam	DNase-seq	hg19	ENCODE Processing Pipeline	muscle of trunk	alignments	released	ENCSR217YRJ	embryo	muscle	NA	NA	NA
ENCFF229SBH	bam	DNase-seq	hg19	ENCODE Processing Pipeline	muscle of arm	alignments	released	ENCSR356QCD	embryo	muscle	NA	NA	NA
ENCFF560XJK	bam	DNase-seq	hg19	ENCODE Processing Pipeline	muscle of arm	alignments	released	ENCSR888GBS	embryo	muscle	NA	NA	NA
ENCFF216WEZ	bam	DNase-seq	hg19	ENCODE Processing Pipeline	muscle of leg	alignments	released	ENCSR294QCR	embryo	muscle	NA	NA	NA
ENCFF693BFS	bam	DNase-seq	hg19	ENCODE Processing Pipeline	muscle of back	alignments	released	ENCSR317SIH	embryo	muscle	NA	NA	NA
ENCFF151JHW	bam	DNase-seq	hg19	ENCODE Processing Pipeline	forelimb muscle	alignments	released	ENCSR166TEE	embryo	muscle	NA	NA	NA
ENCFF663SJQ	bam	DNase-seq	hg19	ENCODE Processing Pipeline	muscle of back	alignments	released	ENCSR033STL	embryo	muscle	NA	NA	NA
ENCFF467OYK	bam	DNase-seq	hg19	ENCODE Processing Pipeline	muscle of leg	alignments	released	ENCSR861NUH	embryo	muscle	NA	NA	NA
ENCFF376AJT	bam	DNase-seq	hg19	ENCODE Processing Pipeline	muscle of back	alignments	released	ENCSR585CGU	embryo	muscle	NA	NA	NA
ENCFF141NAT	bam	DNase-seq	hg19	ENCODE Processing Pipeline	muscle of arm	alignments	released	ENCSR868XPR	embryo	muscle	NA	NA	NA
ENCFF077JZB	bam	DNase-seq	hg19	ENCODE Processing Pipeline	muscle of arm	alignments	released	ENCSR649PJN	embryo	muscle	NA	NA	NA
ENCFF238BRB	bam	DNase-seq	hg19	ENCODE Processing Pipeline	lower leg skin	alignments	released	ENCSR864IGD	adult	skin	OLD	lower leg skin tissue female adult (53 years)	53
ENCFF213QEX	bam	DNase-seq	hg19	ENCODE Processing Pipeline	skin of body	alignments	released	ENCSR092OFK	embryo	skin	NA	NA	NA
ENCFF183HFJ	bam	DNase-seq	hg19	ENCODE Processing Pipeline	spleen	alignments	released	ENCSR850YHJ	adult	spleen	OLD	spleen tissue male adult (54 years)	54
ENCFF039NMI	bam	DNase-seq	hg19	ENCODE Processing Pipeline	spleen	alignments	released	ENCSR679IFH	embryo	spleen	NA	NA	NA
ENCFF512AWR	bam	DNase-seq	hg19	ENCODE Processing Pipeline	stomach	alignments	released	ENCSR782SSS	adult	stomach	YOUNG	stomach tissue male adult (34 years)	34
ENCFF025QEQ	bam	DNase-seq	hg19	ENCODE Processing Pipeline	stomach	alignments	released	ENCSR641ZPF	adult	stomach	OLD	stomach tissue female adult (51 years)	51
ENCFF758MDE	bam	DNase-seq	hg19	ENCODE Processing Pipeline	stomach	alignments	released	ENCSR131JVA	adult	stomach	OLD	stomach tissue female adult (53 years)	53
ENCFF184XKI	bam	DNase-seq	hg19	ENCODE Processing Pipeline	stomach	alignments	released	ENCSR163PKT	adult	stomach	OLD	stomach tissue male adult (54 years)	54
ENCFF999WJD	bam	DNase-seq	hg19	ENCODE Processing Pipeline	stomach	alignments	released	ENCSR683YLO	embryo	stomach	NA	NA	NA
ENCFF561KHG	bam	DNase-seq	hg19	ENCODE Processing Pipeline	stomach	alignments	released	ENCSR941SMM	embryo	stomach	NA	NA	NA
ENCFF679ZBQ	bam	DNase-seq	hg19	ENCODE Processing Pipeline	stomach	alignments	released	ENCSR930YSB	embryo	stomach	NA	NA	NA
ENCFF591NPU	bam	DNase-seq	hg19	ENCODE Processing Pipeline	stomach	alignments	released	ENCSR119HXE	embryo	stomach	NA	NA	NA
ENCFF146ADR	bam	DNase-seq	hg19	ENCODE Processing Pipeline	stomach	alignments	released	ENCSR726YMS	embryo	stomach	NA	NA	NA
ENCFF085BXU	bam	DNase-seq	hg19	ENCODE Processing Pipeline	stomach	alignments	released	ENCSR522FGG	embryo	stomach	NA	NA	NA
ENCFF371NCW	bam	DNase-seq	hg19	ENCODE Processing Pipeline	stomach	alignments	released	ENCSR062DUU	embryo	stomach	NA	NA	NA
ENCFF636FHS	bam	DNase-seq	hg19	ENCODE Processing Pipeline	stomach	alignments	released	ENCSR511GQA	embryo	stomach	NA	NA	NA
ENCFF792JOV	bam	DNase-seq	hg19	ENCODE Processing Pipeline	stomach	alignments	released	ENCSR282QFE	embryo	stomach	NA	NA	NA
ENCFF264LLE	bam	DNase-seq	hg19	ENCODE Processing Pipeline	stomach	alignments	released	ENCSR172PVJ	embryo	stomach	NA	NA	NA
ENCFF148JEQ	bam	DNase-seq	hg19	ENCODE Processing Pipeline	stomach	alignments	released	ENCSR208DMX	embryo	stomach	NA	NA	NA
ENCFF065WZW	bam	DNase-seq	hg19	ENCODE Processing Pipeline	stomach	alignments	released	ENCSR608AHQ	embryo	stomach	NA	NA	NA
ENCFF067LVL	bam	DNase-seq	hg19	ENCODE Processing Pipeline	stomach	alignments	released	ENCSR082XEU	embryo	stomach	NA	NA	NA
ENCFF971APS	bam	DNase-seq	hg19	ENCODE Processing Pipeline	stomach	alignments	released	ENCSR627KFV	embryo	stomach	NA	NA	NA
ENCFF056UYZ	bam	DNase-seq	hg19	ENCODE Processing Pipeline	stomach	alignments	released	ENCSR095GWE	embryo	stomach	NA	NA	NA
ENCFF127RJK	bam	DNase-seq	hg19	ENCODE Processing Pipeline	stomach	alignments	released	ENCSR095GWE	embryo	stomach	NA	NA	NA
Contains information on region sets defined as differentially-accessible between either fetal/adult, or young-adult/older-adult tissue samples. Sheet 1 – “Sample Metadata”: Sample Metadata for ENCODE Dnase-I datasets used. Sheet 2 – “Developmental Regions”: Sets of regions differentially-accessible between fetal (FETAL-BIASED) and adult (ADULT-BIASED) samples. Sheet 3 - “Aging Regions”: Sets of r…

## Sheet: Developmental_Regions
chr	start	end	logFC	t	P.Value	adj.P.Val	DIR
chr1	10280	10430	-2.41	-6.14	4.97e-09	2.967e-08	FETAL-BIASED
chr1	14875	15025	0.67	3.16	0.001853	0.003648	ADULT-BIASED
chr1	17420	17570	1.61	2.96	0.003492	0.006443	ADULT-BIASED
chr1	237699	237849	-2.19	-12.41	5.221e-26	2.074e-24	FETAL-BIASED
chr1	521497	521647	-3.27	-12.84	2.881e-27	1.294e-25	FETAL-BIASED
chr1	566624	566774	-2.16	-3.76	0.0002288	0.0005552	FETAL-BIASED
chr1	567491	567641	-2.64	-5.06	1.014e-06	4.021e-06	FETAL-BIASED
chr1	714154	714304	-1.54	-5.29	3.418e-07	1.483e-06	FETAL-BIASED
chr1	752425	752575	-4.17	-14.19	2.961e-31	1.972e-29	FETAL-BIASED
chr1	752695	752845	-1.66	-8.01	1.355e-13	1.539e-12	FETAL-BIASED
chr1	753333	753483	-1.9	-5.35	2.648e-07	1.172e-06	FETAL-BIASED
chr1	753505	753655	-2.56	-6.5	7.386e-10	5.032e-09	FETAL-BIASED
chr1	755593	755743	2.91	5.17	6.114e-07	2.531e-06	ADULT-BIASED
chr1	756841	756991	1.34	3.15	0.001927	0.003778	ADULT-BIASED
chr1	758026	758176	1.16	2.43	0.01622	0.02555	ADULT-BIASED
chr1	758489	758639	1.17	2.52	0.01254	0.02028	ADULT-BIASED
chr1	762570	762720	-1.13	-6.46	9.267e-10	6.219e-09	FETAL-BIASED
chr1	767256	767406	-2.91	-4.67	5.725e-06	1.956e-05	FETAL-BIASED
chr1	767625	767775	-1.53	-5.18	5.989e-07	2.484e-06	FETAL-BIASED
chr1	769373	769523	1.51	3.54	0.0005045	0.001133	ADULT-BIASED
chr1	771817	771967	1.32	2.76	0.006333	0.01099	ADULT-BIASED
chr1	776871	777021	1.46	2.91	0.004117	0.007469	ADULT-BIASED
chr1	778682	778832	3.31	7.86	3.206e-13	3.482e-12	ADULT-BIASED
chr1	785797	785947	-2.41	-11.89	1.778e-24	6.085e-23	FETAL-BIASED
chr1	790371	790521	1.49	2.97	0.003431	0.006342	ADULT-BIASED
chr1	791753	791903	1.59	4.03	8.32e-05	0.0002227	ADULT-BIASED
chr1	792293	792443	1.65	2.68	0.008089	0.01369	ADULT-BIASED
chr1	794220	794370	-2.21	-4.33	2.485e-05	7.441e-05	FETAL-BIASED
chr1	800911	801061	-1.49	-2.5	0.01317	0.0212	FETAL-BIASED
chr1	801675	801825	-2.36	-3.57	0.0004558	0.001033	FETAL-BIASED
chr1	802397	802547	1.3	2.29	0.02321	0.03525	ADULT-BIASED
chr1	805229	805379	-1.69	-9.37	2.775e-17	4.733e-16	FETAL-BIASED
chr1	805422	805572	-0.73	-2.99	0.00319	0.005941	FETAL-BIASED
chr1	808561	808711	1.42	4.31	2.623e-05	7.818e-05	ADULT-BIASED
chr1	810559	810709	1.71	3.53	0.0005179	0.00116	ADULT-BIASED
chr1	812275	812425	-2.05	-3.28	0.001249	0.002558	FETAL-BIASED
chr1	824831	824981	1.34	2.83	0.005242	0.009276	ADULT-BIASED
chr1	826047	826197	0.87	3.29	0.001224	0.002512	ADULT-BIASED
chr1	833421	833571	1.01	2.21	0.02817	0.04192	ADULT-BIASED
chr1	834760	834910	1.53	4.07	6.943e-05	0.0001889	ADULT-BIASED
chr1	835293	835443	2.47	5.87	2.053e-08	1.105e-07	ADULT-BIASED
chr1	836653	836803	0.81	3.55	0.0004892	0.001102	ADULT-BIASED
chr1	837743	837893	1.35	4.39	1.899e-05	5.826e-05	ADULT-BIASED
chr1	840855	841005	-1.42	-12.84	2.929e-27	1.315e-25	FETAL-BIASED
chr1	846107	846257	-0.81	-4.12	5.652e-05	0.0001569	FETAL-BIASED
chr1	852593	852743	-0.78	-3.06	0.002571	0.004895	FETAL-BIASED
chr1	855952	856102	-0.94	-4.46	1.46e-05	4.589e-05	FETAL-BIASED
chr1	859111	859261	-2.02	-11.91	1.534e-24	5.281e-23	FETAL-BIASED
chr1	860263	860413	-1.63	-7.8	4.705e-13	5.004e-12	FETAL-BIASED
chr1	861097	861247	-1.42	-5.86	2.096e-08	1.126e-07	FETAL-BIASED
chr1	865527	865677	1.73	5.12	7.703e-07	3.127e-06	ADULT-BIASED
chr1	876926	877076	-3.47	-6.77	1.71e-10	1.282e-09	FETAL-BIASED
chr1	877867	878017	-1.56	-5.94	1.424e-08	7.875e-08	FETAL-BIASED
chr1	886083	886233	1.38	4.92	1.901e-06	7.148e-06	ADULT-BIASED
chr1	890515	890665	1.47	4.03	8.048e-05	0.0002161	ADULT-BIASED
chr1	891843	891993	2.07	6.22	3.324e-09	2.042e-08	ADULT-BIASED
chr1	892812	892962	1.98	3.95	0.0001121	0.0002916	ADULT-BIASED
chr1	894619	894769	-1.32	-9.57	8.195e-18	1.478e-16	FETAL-BIASED
chr1	895981	896131	-0.72	-2.74	0.006856	0.0118	FETAL-BIASED
chr1	896793	896943	-0.53	-3.14	0.001993	0.003893	FETAL-BIASED
chr1	902301	902451	-1.03	-8.56	4.75e-15	6.389e-14	FETAL-BIASED
chr1	907958	908108	2.29	3.51	0.000565	0.001255	ADULT-BIASED
chr1	911525	911675	-2.05	-10.63	8.12e-21	1.968e-19	FETAL-BIASED
chr1	916625	916775	1.55	5.89	1.796e-08	9.759e-08	ADULT-BIASED
chr1	920349	920499	3.13	5.03	1.188e-06	4.649e-06	ADULT-BIASED
chr1	921367	921517	2	3.49	0.0005957	0.001316	ADULT-BIASED
chr1	921677	921827	2.04	3.79	0.000203	0.0004985	ADULT-BIASED
chr1	922990	923140	2.73	4.49	1.251e-05	3.988e-05	ADULT-BIASED
chr1	923626	923776	3.5	7.57	1.792e-12	1.769e-11	ADULT-BIASED
chr1	928896	929046	1.48	3.52	0.0005378	0.0012	ADULT-BIASED
chr1	929813	929963	1.27	2.24	0.02638	0.03954	ADULT-BIASED
chr1	934913	935063	-1.05	-3.99	9.419e-05	0.0002491	FETAL-BIASED
chr1	935487	935637	-2.25	-3.44	0.0007143	0.001549	FETAL-BIASED
chr1	940383	940533	-0.8	-7.36	6.14e-12	5.643e-11	FETAL-BIASED
chr1	942637	942787	1.78	2.89	0.004297	0.007761	ADULT-BIASED
chr1	943562	943712	1.15	2.21	0.02826	0.04205	ADULT-BIASED
chr1	944107	944257	2.37	3.63	0.0003728	0.0008624	ADULT-BIASED
chr1	944649	944799	1.53	3.89	0.0001429	0.000363	ADULT-BIASED
chr1	945306	945456	1.31	2.23	0.02695	0.0403	ADULT-BIASED
chr1	945663	945813	1.72	2.94	0.00372	0.006819	ADULT-BIASED
chr1	946597	946747	1.23	2.26	0.02481	0.03742	ADULT-BIASED
chr1	946913	947063	1.26	2.34	0.02013	0.03102	ADULT-BIASED
chr1	949747	949897	-1	-4.45	1.521e-05	4.762e-05	FETAL-BIASED
chr1	956021	956171	-0.87	-3.06	0.002555	0.004867	FETAL-BIASED
chr1	964495	964645	1.08	2.4	0.01726	0.02702	ADULT-BIASED
chr1	968679	968829	-1.95	-7.71	8.14e-13	8.409e-12	FETAL-BIASED
chr1	971664	971814	1.3	2.89	0.004258	0.007699	ADULT-BIASED
chr1	976095	976245	-2.01	-10.94	1.023e-21	2.696e-20	FETAL-BIASED
chr1	980576	980726	2.35	4.81	3.154e-06	1.135e-05	ADULT-BIASED
chr1	986235	986385	-3.11	-3.78	0.0002164	0.000528	FETAL-BIASED
chr1	990435	990585	1.94	6.48	8.482e-10	5.726e-09	ADULT-BIASED
chr1	994857	995007	-0.95	-4.54	1.014e-05	3.295e-05	FETAL-BIASED
chr1	1001035	1001185	0.82	2.32	0.02133	0.03267	ADULT-BIASED
chr1	1004453	1004603	-0.73	-2.88	0.004408	0.007942	FETAL-BIASED
chr1	1015335	1015485	-1.11	-5.08	9.259e-07	3.701e-06	FETAL-BIASED
chr1	1022381	1022531	3	5.26	4.043e-07	1.731e-06	ADULT-BIASED
chr1	1028983	1029133	1.86	5.72	4.233e-08	2.16e-07	ADULT-BIASED
chr1	1032171	1032321	1.6	3.9	0.0001337	0.0003418	ADULT-BIASED
chr1	1032739	1032889	2.78	4.28	3.066e-05	9.011e-05	ADULT-BIASED
chr1	1035798	1035948	1.71	6.07	7.452e-09	4.321e-08	ADULT-BIASED
chr1	1038219	1038369	2.06	3.63	0.0003693	0.0008549	ADULT-BIASED
chr1	1040020	1040170	0.99	2.68	0.007954	0.01348	ADULT-BIASED
chr1	1040681	1040831	1.2	2.6	0.01003	0.0166	ADULT-BIASED
chr1	1042247	1042397	2.73	5.74	3.826e-08	1.967e-07	ADULT-BIASED
chr1	1046059	1046209	1.48	3.74	0.0002427	0.0005856	ADULT-BIASED
chr1	1049775	1049925	1.01	2.53	0.01217	0.01975	ADULT-BIASED
chr1	1051671	1051821	-1.91	-8.31	2.133e-14	2.662e-13	FETAL-BIASED
chr1	1054373	1054523	1.46	4.22	3.78e-05	0.0001089	ADULT-BIASED
chr1	1054927	1055077	1.8	3.41	0.0008065	0.001728	ADULT-BIASED
chr1	1055693	1055843	2.12	6.42	1.183e-09	7.803e-09	ADULT-BIASED
chr1	1057737	1057887	-0.63	-3.94	0.000117	0.0003031	FETAL-BIASED
chr1	1059200	1059350	-1.35	-2.57	0.01093	0.01793	FETAL-BIASED
chr1	1065638	1065788	-1.54	-12.7	7.21e-27	3.119e-25	FETAL-BIASED
chr1	1066706	1066856	1.94	4.03	8.179e-05	0.0002193	ADULT-BIASED
chr1	1068349	1068499	-0.93	-3.18	0.001723	0.003416	FETAL-BIASED
chr1	1074129	1074279	1.66	3.19	0.001701	0.003378	ADULT-BIASED
chr1	1077273	1077423	1.4	3.81	0.0001873	0.0004635	ADULT-BIASED
chr1	1083055	1083205	2.04	6.36	1.578e-09	1.021e-08	ADULT-BIASED
chr1	1083799	1083949	1.89	6.69	2.704e-10	1.968e-09	ADULT-BIASED
chr1	1084369	1084519	2.14	5.79	3.086e-08	1.612e-07	ADULT-BIASED
chr1	1087805	1087955	2.44	3.69	0.0002909	0.0006894	ADULT-BIASED
chr1	1088577	1088727	2.94	4.39	1.885e-05	5.789e-05	ADULT-BIASED
chr1	1089885	1090035	2.08	3.18	0.001744	0.003454	ADULT-BIASED
chr1	1093547	1093697	-1.14	-4.19	4.313e-05	0.0001228	FETAL-BIASED
chr1	1109227	1109377	-1.57	-5.99	1.12e-08	6.306e-08	FETAL-BIASED
chr1	1111026	1111176	1.12	2.18	0.03069	0.04529	ADULT-BIASED
chr1	1112618	1112768	1.76	2.78	0.006002	0.01048	ADULT-BIASED
chr1	1121302	1121452	1	2.86	0.004669	0.008361	ADULT-BIASED
chr1	1122435	1122585	2.5	5.4	2.06e-07	9.304e-07	ADULT-BIASED
chr1	1128388	1128538	2.4	4.12	5.735e-05	0.0001589	ADULT-BIASED
chr1	1134347	1134497	0.98	3.29	0.001203	0.002475	ADULT-BIASED
chr1	1140629	1140779	1.36	5.63	6.848e-08	3.37e-07	ADULT-BIASED
chr1	1143710	1143860	-0.94	-4	9.095e-05	0.0002413	FETAL-BIASED
chr1	1145059	1145209	1.46	4.35	2.275e-05	6.87e-05	ADULT-BIASED
chr1	1148380	1148530	-0.47	-3.06	0.002585	0.004918	FETAL-BIASED
chr1	1150854	1151004	0.89	2.55	0.01172	0.0191	ADULT-BIASED
chr1	1156841	1156991	1.73	8.12	6.936e-14	8.152e-13	ADULT-BIASED
chr1	1158007	1158157	1.6	7.27	1.031e-11	9.189e-11	ADULT-BIASED
chr1	1159192	1159342	3.02	6.04	8.644e-09	4.96e-08	ADULT-BIASED
chr1	1160025	1160175	1.52	3.18	0.001705	0.003385	ADULT-BIASED
chr1	1161451	1161601	2.14	8.15	5.778e-14	6.856e-13	ADULT-BIASED
chr1	1163485	1163635	2.58	5.49	1.319e-07	6.165e-07	ADULT-BIASED
chr1	1165118	1165268	1.4	6.15	4.861e-09	2.907e-08	ADULT-BIASED
chr1	1167085	1167235	-0.56	-4.5	1.224e-05	3.909e-05	FETAL-BIASED
chr1	1167448	1167598	-2.57	-11.71	6.022e-24	1.961e-22	FETAL-BIASED
chr1	1174572	1174722	0.74	2.34	0.02032	0.03128	ADULT-BIASED
chr1	1186334	1186484	0.74	3.16	0.001831	0.003607	ADULT-BIASED
chr1	1186994	1187144	1.75	6.37	1.532e-09	9.933e-09	ADULT-BIASED
chr1	1188171	1188321	0.94	3.48	0.0006174	0.001359	ADULT-BIASED
chr1	1188925	1189075	0.88	2.28	0.02376	0.036	ADULT-BIASED
chr1	1190283	1190433	1.63	3.64	0.0003599	0.0008353	ADULT-BIASED
chr1	1191790	1191940	1.3	3.55	0.0004889	0.001101	ADULT-BIASED
chr1	1192733	1192883	2.04	3.76	0.0002288	0.0005553	ADULT-BIASED
chr1	1195743	1195893	0.64	2.63	0.009376	0.01563	ADULT-BIASED
chr1	1197963	1198113	2.23	5.87	1.994e-08	1.075e-07	ADULT-BIASED
chr1	1199783	1199933	1.63	3.59	0.000432	0.0009845	ADULT-BIASED
chr1	1201408	1201558	1.54	3.88	0.0001451	0.0003682	ADULT-BIASED
chr1	1202637	1202787	1.8	4.52	1.093e-05	3.527e-05	ADULT-BIASED
chr1	1203182	1203332	1.54	3.29	0.001199	0.002467	ADULT-BIASED
chr1	1203989	1204139	1.29	4.47	1.39e-05	4.388e-05	ADULT-BIASED
chr1	1206199	1206349	1.09	2.35	0.01959	0.03027	ADULT-BIASED
chr1	1206996	1207146	2.03	4.36	2.161e-05	6.555e-05	ADULT-BIASED
chr1	1209217	1209367	-1.92	-14.2	2.763e-31	1.845e-29	FETAL-BIASED
chr1	1214331	1214481	1.84	5.08	9.199e-07	3.679e-06	ADULT-BIASED
chr1	1215067	1215217	2.59	7.02	4.216e-11	3.452e-10	ADULT-BIASED
chr1	1215371	1215521	1.95	6.21	3.423e-09	2.098e-08	ADULT-BIASED
chr1	1216955	1217105	0.59	4.01	8.904e-05	0.0002367	ADULT-BIASED
chr1	1225765	1225915	0.41	2.68	0.008077	0.01367	ADULT-BIASED
chr1	1227066	1227216	-0.56	-2.53	0.01239	0.02007	FETAL-BIASED
chr1	1228815	1228965	1.26	2.63	0.009325	0.01555	ADULT-BIASED
chr1	1234375	1234525	-1.64	-4.29	2.882e-05	8.515e-05	FETAL-BIASED
chr1	1242315	1242465	-0.47	-2.65	0.008844	0.01483	FETAL-BIASED
chr1	1243373	1243523	-2.75	-18.44	1.805e-43	4.396e-41	FETAL-BIASED
chr1	1253019	1253169	0.97	2.23	0.027	0.04037	ADULT-BIASED
chr1	1253766	1253916	-0.56	-2.73	0.006874	0.01183	FETAL-BIASED
chr1	1255962	1256112	1.23	4.48	1.328e-05	4.211e-05	ADULT-BIASED
chr1	1258127	1258277	1.41	4.95	1.716e-06	6.509e-06	ADULT-BIASED
chr1	1258482	1258632	1.99	5.79	3.066e-08	1.602e-07	ADULT-BIASED
chr1	1260365	1260515	-0.59	-5.5	1.295e-07	6.063e-07	FETAL-BIASED
chr1	1267742	1267892	1.02	3.81	0.0001923	0.0004746	ADULT-BIASED
chr1	1280675	1280825	1.23	2.81	0.005418	0.009554	ADULT-BIASED
chr1	1284675	1284825	-1.86	-9.26	5.675e-17	9.367e-16	FETAL-BIASED
chr1	1293917	1294067	-2.63	-5.96	1.265e-08	7.057e-08	FETAL-BIASED
chr1	1297437	1297587	-1.82	-15.83	4.77e-36	5.302e-34	FETAL-BIASED
chr1	1298518	1298668	3.1	5.33	2.952e-07	1.296e-06	ADULT-BIASED
chr1	1299747	1299897	1.45	3.66	0.0003324	0.0007776	ADULT-BIASED
chr1	1305553	1305703	1.13	2.96	0.003473	0.006411	ADULT-BIASED
chr1	1307503	1307653	-1.13	-9.55	9.099e-18	1.634e-16	FETAL-BIASED
chr1	1309753	1309903	0.94	3.06	0.002512	0.004793	ADULT-BIASED
chr1	1310853	1311003	-2.1	-6.92	7.48e-11	5.909e-10	FETAL-BIASED
chr1	1311925	1312075	0.64	2.92	0.003948	0.007193	ADULT-BIASED
chr1	1312979	1313129	1.34	3.17	0.001777	0.003514	ADULT-BIASED
chr1	1313339	1313489	1.63	3.3	0.00116	0.002396	ADULT-BIASED
chr1	1313837	1313987	2.02	3.27	0.001272	0.002601	ADULT-BIASED
chr1	1314660	1314810	1.82	4.59	8.386e-06	2.77e-05	ADULT-BIASED
chr1	1316562	1316712	2.04	3.96	0.0001056	0.0002763	ADULT-BIASED
chr1	1318939	1319089	1.8	4.83	2.895e-06	1.05e-05	ADULT-BIASED
chr1	1319427	1319577	1.61	5.11	8.151e-07	3.293e-06	ADULT-BIASED
chr1	1321300	1321450	1.48	4.48	1.339e-05	4.24e-05	ADULT-BIASED
chr1	1322875	1323025	1.86	5.67	5.605e-08	2.8e-07	ADULT-BIASED
chr1	1324901	1325051	1.14	2.95	0.003549	0.006537	ADULT-BIASED
chr1	1325560	1325710	1.83	7.96	1.778e-13	1.991e-12	ADULT-BIASED
chr1	1326150	1326300	1.58	5.49	1.314e-07	6.144e-07	ADULT-BIASED
chr1	1327229	1327379	2.09	7.89	2.722e-13	2.981e-12	ADULT-BIASED
chr1	1327403	1327553	1.75	7.47	3.216e-12	3.071e-11	ADULT-BIASED
chr1	1328021	1328171	1.57	5.58	8.484e-08	4.106e-07	ADULT-BIASED
chr1	1328523	1328673	1.41	4.27	3.169e-05	9.285e-05	ADULT-BIASED
chr1	1332901	1333051	0.81	3.13	0.002047	0.003987	ADULT-BIASED
chr1	1334810	1334960	-1.71	-7.91	2.499e-13	2.75e-12	FETAL-BIASED
chr1	1335381	1335531	-0.72	-6.01	9.898e-09	5.625e-08	FETAL-BIASED
chr1	1337886	1338036	0.54	2.61	0.009904	0.01642	ADULT-BIASED
chr1	1340233	1340383	1.11	5.3	3.407e-07	1.478e-06	ADULT-BIASED
chr1	1340936	1341086	0.99	3.62	0.0003865	0.0008909	ADULT-BIASED
chr1	1342539	1342689	-2.14	-13.89	2.278e-30	1.387e-28	FETAL-BIASED
chr1	1346169	1346319	1.77	4.76	3.869e-06	1.368e-05	ADULT-BIASED
chr1	1347163	1347313	1.54	4.87	2.4e-06	8.843e-06	ADULT-BIASED
chr1	1347438	1347588	1.1	2.42	0.01646	0.02589	ADULT-BIASED
chr1	1350550	1350700	2.16	6.67	3.001e-10	2.17e-09	ADULT-BIASED
chr1	1351221	1351371	0.81	2.36	0.0193	0.02987	ADULT-BIASED
chr1	1353489	1353639	1.56	3.96	0.0001091	0.0002845	ADULT-BIASED
chr1	1359551	1359701	2.07	4.62	7.103e-06	2.382e-05	ADULT-BIASED
chr1	1365597	1365747	-2.03	-15.7	1.206e-35	1.279e-33	FETAL-BIASED
chr1	1368963	1369113	-1.02	-4.61	7.705e-06	2.565e-05	FETAL-BIASED
chr1	1378639	1378789	1.68	4.64	6.592e-06	2.225e-05	ADULT-BIASED
chr1	1379553	1379703	2.16	9.17	1.043e-16	1.675e-15	ADULT-BIASED
chr1	1380553	1380703	3.08	11.96	1.121e-24	3.914e-23	ADULT-BIASED
chr1	1381405	1381555	3.75	8.15	5.622e-14	6.679e-13	ADULT-BIASED
chr1	1382851	1383001	2.59	5.31	3.19e-07	1.392e-06	ADULT-BIASED
chr1	1386127	1386277	4.63	10.12	2.179e-19	4.597e-18	ADULT-BIASED
chr1	1387439	1387589	2.8	7.03	4.015e-11	3.298e-10	ADULT-BIASED
chr1	1388644	1388794	1.8	3.64	0.0003561	0.0008274	ADULT-BIASED
chr1	1389989	1390139	3.3	6.84	1.179e-10	9.049e-10	ADULT-BIASED
chr1	1390917	1391067	2.74	8.8	1.049e-15	1.515e-14	ADULT-BIASED
chr1	1392384	1392534	2.34	4.39	1.902e-05	5.834e-05	ADULT-BIASED
chr1	1393542	1393692	2.57	4.1	6.317e-05	0.0001734	ADULT-BIASED
chr1	1395279	1395429	3.42	7.73	6.895e-13	7.184e-12	ADULT-BIASED
chr1	1396122	1396272	2.02	3.63	0.0003736	0.0008639	ADULT-BIASED
chr1	1399705	1399855	1.18	5.75	3.71e-08	1.911e-07	ADULT-BIASED
chr1	1400458	1400608	3.32	7.32	7.78e-12	7.054e-11	ADULT-BIASED
chr1	1402681	1402831	4.22	7.78	5.158e-13	5.46e-12	ADULT-BIASED
chr1	1403079	1403229	2.49	4.84	2.755e-06	1.004e-05	ADULT-BIASED
chr1	1403698	1403848	2.73	7.47	3.26e-12	3.111e-11	ADULT-BIASED
chr1	1404126	1404276	3.36	6.48	8.431e-10	5.694e-09	ADULT-BIASED
chr1	1404309	1404459	2.87	4.65	6.47e-06	2.187e-05	ADULT-BIASED
chr1	1404937	1405087	2.19	4.56	9.557e-06	3.121e-05	ADULT-BIASED
chr1	1406578	1406728	-2.89	-10.2	1.352e-19	2.91e-18	FETAL-BIASED
chr1	1406814	1406964	-1.51	-11.22	1.564e-22	4.455e-21	FETAL-BIASED
chr1	1408999	1409149	2.7	4.84	2.799e-06	1.018e-05	ADULT-BIASED
chr1	1409342	1409492	2.39	7.43	4.188e-12	3.937e-11	ADULT-BIASED
chr1	1410631	1410781	3.42	7.24	1.194e-11	1.056e-10	ADULT-BIASED
chr1	1412639	1412789	3.36	7.27	1.049e-11	9.344e-11	ADULT-BIASED
chr1	1415291	1415441	1.95	5.34	2.809e-07	1.238e-06	ADULT-BIASED
chr1	1417247	1417397	2.92	5.28	3.722e-07	1.604e-06	ADULT-BIASED
chr1	1419211	1419361	2.2	9.49	1.309e-17	2.311e-16	ADULT-BIASED
chr1	1420752	1420902	2.31	5.02	1.228e-06	4.791e-06	ADULT-BIASED
chr1	1421364	1421514	1.8	4.62	7.4e-06	2.472e-05	ADULT-BIASED
chr1	1422141	1422291	3.1	5.92	1.552e-08	8.531e-08	ADULT-BIASED
chr1	1423445	1423595	1.84	3.58	0.0004464	0.001014	ADULT-BIASED
chr1	1425087	1425237	3.05	8.55	4.924e-15	6.611e-14	ADULT-BIASED
chr1	1426489	1426639	2.26	6.4	1.268e-09	8.329e-09	ADULT-BIASED
chr1	1430663	1430813	2.02	6.58	4.919e-10	3.442e-09	ADULT-BIASED
chr1	1433153	1433303	1.6	4.08	6.617e-05	0.0001809	ADULT-BIASED
chr1	1434761	1434911	1.82	3.34	0.001025	0.002143	ADULT-BIASED
chr1	1436328	1436478	-1.03	-2.61	0.009831	0.01631	FETAL-BIASED
chr1	1438989	1439139	3.46	7.79	4.942e-13	5.243e-12	ADULT-BIASED
chr1	1439645	1439795	1.11	3	0.003107	0.005803	ADULT-BIASED
chr1	1440285	1440435	-1.2	-10.73	3.984e-21	9.936e-20	FETAL-BIASED
chr1	1440579	1440729	-0.97	-3.21	0.001591	0.003181	FETAL-BIASED
chr1	1440881	1441031	2.3	3.53	0.0005183	0.001161	ADULT-BIASED
chr1	1441821	1441971	1.11	3.54	0.0005073	0.001138	ADULT-BIASED
chr1	1442358	1442508	2.42	4.26	3.324e-05	9.695e-05	ADULT-BIASED
chr1	1443421	1443571	2.71	6.67	3.041e-10	2.196e-09	ADULT-BIASED
chr1	1446924	1447074	-0.4	-3.45	0.0007082	0.001537	FETAL-BIASED
chr1	1447169	1447319	-1.63	-9.64	4.917e-18	9.071e-17	FETAL-BIASED
chr1	1449055	1449205	2.8	8.46	8.564e-15	1.118e-13	ADULT-BIASED
chr1	1450231	1450381	0.96	3.19	0.001695	0.003366	ADULT-BIASED
chr1	1451157	1451307	2.26	3.99	9.488e-05	0.0002507	ADULT-BIASED
chr1	1451464	1451614	3.23	6.86	1.044e-10	8.077e-10	ADULT-BIASED
chr1	1452294	1452444	2.23	4.51	1.143e-05	3.674e-05	ADULT-BIASED
chr1	1453805	1453955	2.55	7.23	1.323e-11	1.163e-10	ADULT-BIASED
chr1	1455267	1455417	3.14	7.65	1.155e-12	1.17e-11	ADULT-BIASED
chr1	1455933	1456083	3.98	8.21	4.083e-14	4.931e-13	ADULT-BIASED
chr1	1457095	1457245	1.7	3.04	0.002725	0.005156	ADULT-BIASED
chr1	1458525	1458675	2.87	8.92	5.043e-16	7.529e-15	ADULT-BIASED
chr1	1460429	1460579	3.15	8.93	4.617e-16	6.922e-15	ADULT-BIASED
chr1	1461545	1461695	1.86	3	0.003031	0.005674	ADULT-BIASED
chr1	1461977	1462127	2.8	6.46	9.281e-10	6.228e-09	ADULT-BIASED
chr1	1462786	1462936	2.24	8.32	1.986e-14	2.488e-13	ADULT-BIASED
chr1	1464023	1464173	2.05	4.68	5.666e-06	1.938e-05	ADULT-BIASED
chr1	1464943	1465093	1.6	3.78	0.0002123	0.0005191	ADULT-BIASED
chr1	1468461	1468611	2.75	5.62	6.976e-08	3.427e-07	ADULT-BIASED
chr1	1469331	1469481	0.86	3.24	0.001427	0.002884	ADULT-BIASED
chr1	1471502	1471652	1.26	3.57	0.0004532	0.001028	ADULT-BIASED
chr1	1475359	1475509	-0.81	-2.45	0.01525	0.02417	FETAL-BIASED
chr1	1479158	1479308	-2.4	-5.32	2.959e-07	1.298e-06	FETAL-BIASED
chr1	1479329	1479479	-2.43	-3.91	0.0001312	0.0003361	FETAL-BIASED
chr1	1480049	1480199	1.05	3.88	0.0001487	0.0003764	ADULT-BIASED
chr1	1480625	1480775	0.34	2.21	0.02855	0.04244	ADULT-BIASED
chr1	1481307	1481457	-0.33	-2.43	0.01589	0.02509	FETAL-BIASED
chr1	1481877	1482027	0.61	3.22	0.001518	0.003049	ADULT-BIASED
chr1	1483246	1483396	1.19	6.17	4.343e-09	2.617e-08	ADULT-BIASED
chr1	1484132	1484282	0.38	2.17	0.03133	0.04614	ADULT-BIASED
chr1	1486935	1487085	0.98	2.97	0.003333	0.006179	ADULT-BIASED
chr1	1490243	1490393	-0.95	-5.54	1.046e-07	4.979e-07	FETAL-BIASED
chr1	1492098	1492248	1.19	4.81	3.143e-06	1.132e-05	ADULT-BIASED
chr1	1494371	1494521	1.01	4.07	6.976e-05	0.0001897	ADULT-BIASED
chr1	1495671	1495821	1.26	4.52	1.131e-05	3.639e-05	ADULT-BIASED
chr1	1496451	1496601	2.06	3.76	0.0002266	0.0005505	ADULT-BIASED
chr1	1497042	1497192	0.91	3.34	0.00101	0.002115	ADULT-BIASED
chr1	1498057	1498207	1.46	3.22	0.001522	0.003056	ADULT-BIASED
chr1	1499171	1499321	1	4.04	7.917e-05	0.0002129	ADULT-BIASED
chr1	1499693	1499843	-1.96	-7.17	1.782e-11	1.539e-10	FETAL-BIASED
chr1	1501073	1501223	0.87	3.68	0.0003099	0.0007301	ADULT-BIASED
chr1	1502526	1502676	1.2	5.68	5.247e-08	2.635e-07	ADULT-BIASED
chr1	1502993	1503143	1.53	3.39	0.0008455	0.001803	ADULT-BIASED
chr1	1504623	1504773	0.87	2.56	0.01121	0.01835	ADULT-BIASED
chr1	1504993	1505143	1.05	4.12	5.85e-05	0.0001618	ADULT-BIASED
chr1	1505793	1505943	1.39	3.19	0.001652	0.003289	ADULT-BIASED
chr1	1506975	1507125	1.02	3.49	0.0005966	0.001317	ADULT-BIASED
chr1	1509919	1510069	-2.03	-12.57	1.722e-26	7.173e-25	FETAL-BIASED
chr1	1510097	1510247	-1.46	-7.66	1.1e-12	1.117e-11	FETAL-BIASED
chr1	1513445	1513595	2.02	6.91	7.888e-11	6.21e-10	ADULT-BIASED
chr1	1514586	1514736	0.93	2.21	0.02839	0.04222	ADULT-BIASED
chr1	1518357	1518507	1.23	6	1.066e-08	6.026e-08	ADULT-BIASED
chr1	1518960	1519110	1.92	4.16	4.908e-05	0.0001381	ADULT-BIASED
chr1	1521724	1521874	1.15	4.78	3.597e-06	1.28e-05	ADULT-BIASED
chr1	1522523	1522673	1.44	4.29	2.907e-05	8.582e-05	ADULT-BIASED
chr1	1524195	1524345	2.93	7.7	8.431e-13	8.692e-12	ADULT-BIASED
chr1	1525227	1525377	2.24	6.72	2.26e-10	1.664e-09	ADULT-BIASED
chr1	1526470	1526620	2.65	8	1.457e-13	1.649e-12	ADULT-BIASED
chr1	1526871	1527021	2.31	7.9	2.64e-13	2.896e-12	ADULT-BIASED
chr1	1527235	1527385	2.45	4.61	7.493e-06	2.5e-05	ADULT-BIASED
chr1	1527511	1527661	3.05	8.88	6.506e-16	9.608e-15	ADULT-BIASED
chr1	1529755	1529905	1.53	3.97	0.0001049	0.0002744	ADULT-BIASED
chr1	1532839	1532989	-1.25	-7.68	9.287e-13	9.525e-12	FETAL-BIASED
chr1	1533693	1533843	0.45	2.4	0.0173	0.02706	ADULT-BIASED
chr1	1536791	1536941	1.6	6.42	1.146e-09	7.576e-09	ADULT-BIASED
chr1	1538873	1539023	1.52	5.95	1.327e-08	7.378e-08	ADULT-BIASED
chr1	1540078	1540228	1.39	4.61	7.673e-06	2.555e-05	ADULT-BIASED
chr1	1540701	1540851	1.74	5.41	1.965e-07	8.907e-07	ADULT-BIASED
chr1	1541256	1541406	2.31	4.24	3.588e-05	0.0001039	ADULT-BIASED
chr1	1541795	1541945	2.97	5.79	2.966e-08	1.554e-07	ADULT-BIASED
chr1	1542985	1543135	1.9	7.39	5.152e-12	4.784e-11	ADULT-BIASED
chr1	1544219	1544369	2.88	7.78	5.421e-13	5.725e-12	ADULT-BIASED
chr1	1546212	1546362	0.63	3.12	0.002137	0.004145	ADULT-BIASED
chr1	1546441	1546591	-0.64	-3.5	0.0005837	0.001292	FETAL-BIASED
chr1	1546665	1546815	-2.33	-11.83	2.63e-24	8.857e-23	FETAL-BIASED
chr1	1550517	1550667	-1.77	-14.15	3.91e-31	2.571e-29	FETAL-BIASED
chr1	1550853	1551003	-1.65	-9.82	1.561e-18	3.025e-17	FETAL-BIASED
chr1	1552931	1553081	1.27	3.83	0.0001767	0.0004399	ADULT-BIASED
chr1	1553827	1553977	1.22	3.66	0.0003299	0.0007723	ADULT-BIASED
chr1	1560826	1560976	-1.39	-5.35	2.681e-07	1.186e-06	FETAL-BIASED
chr1	1561223	1561373	-1.37	-2.37	0.01866	0.02897	FETAL-BIASED
chr1	1566279	1566429	-3.13	-3.37	0.0009121	0.00193	FETAL-BIASED
chr1	1570085	1570235	1.67	3.36	0.0009439	0.001991	ADULT-BIASED
chr1	1572252	1572402	2	3.27	0.001269	0.002595	ADULT-BIASED
chr1	1573049	1573199	1.42	4.28	3.033e-05	8.922e-05	ADULT-BIASED
chr1	1573964	1574114	1.63	4.27	3.11e-05	9.127e-05	ADULT-BIASED
chr1	1581785	1581935	-3.68	-9.69	3.631e-18	6.786e-17	FETAL-BIASED
chr1	1582729	1582879	2.26	7.03	4.003e-11	3.289e-10	ADULT-BIASED
chr1	1583390	1583540	1.83	7.89	2.706e-13	2.965e-12	ADULT-BIASED
chr1	1584216	1584366	2.59	4.26	3.222e-05	9.423e-05	ADULT-BIASED
chr1	1586373	1586523	1.76	2.63	0.009313	0.01554	ADULT-BIASED
chr1	1586694	1586844	1.91	6.88	9.511e-11	7.404e-10	ADULT-BIASED
chr1	1590528	1590678	-1.85	-4.88	2.292e-06	8.48e-06	FETAL-BIASED
chr1	1594321	1594471	1.4	4.71	4.878e-06	1.69e-05	ADULT-BIASED
chr1	1594664	1594814	2.18	3.43	0.0007497	0.001618	ADULT-BIASED
chr1	1598004	1598154	1.5	3.67	0.0003129	0.0007364	ADULT-BIASED
chr1	1601247	1601397	1.61	4.94	1.766e-06	6.682e-06	ADULT-BIASED
chr1	1602941	1603091	1.12	3.25	0.001375	0.002789	ADULT-BIASED
chr1	1603999	1604149	1.84	6.74	2.018e-10	1.496e-09	ADULT-BIASED
chr1	1606340	1606490	3.04	5.14	7.033e-07	2.877e-06	ADULT-BIASED
chr1	1612107	1612257	1.18	3.1	0.002243	0.004328	ADULT-BIASED
chr1	1612963	1613113	1.58	4.25	3.348e-05	9.756e-05	ADULT-BIASED
chr1	1613873	1614023	1.37	5.12	7.632e-07	3.101e-06	ADULT-BIASED
chr1	1616625	1616775	2.23	5.44	1.707e-07	7.821e-07	ADULT-BIASED
chr1	1616985	1617135	1.17	2.92	0.00391	0.007131	ADULT-BIASED
chr1	1617965	1618115	1.64	6.56	5.415e-10	3.766e-09	ADULT-BIASED
chr1	1618673	1618823	1.82	5.2	5.238e-07	2.196e-06	ADULT-BIASED
chr1	1619499	1619649	1.56	3.54	0.0005086	0.001141	ADULT-BIASED
chr1	1620765	1620915	2.49	5.55	9.975e-08	4.765e-07	ADULT-BIASED
chr1	1621082	1621232	3.64	8.26	2.985e-14	3.661e-13	ADULT-BIASED
chr1	1624203	1624353	-1.57	-5.31	3.137e-07	1.37e-06	FETAL-BIASED
chr1	1628133	1628283	1.85	5.99	1.1e-08	6.201e-08	ADULT-BIASED
chr1	1628917	1629067	3.55	8.78	1.2e-15	1.722e-14	ADULT-BIASED
chr1	1635618	1635768	3.83	6.83	1.22e-10	9.344e-10	ADULT-BIASED
chr1	1638174	1638324	3.79	8.69	2.107e-15	2.946e-14	ADULT-BIASED
chr1	1650409	1650559	1.57	3.97	0.0001047	0.0002741	ADULT-BIASED
chr1	1655803	1655953	-2.07	-6.86	1.065e-10	8.227e-10	FETAL-BIASED
chr1	1657901	1658051	1.57	3.29	0.001217	0.0025	ADULT-BIASED
chr1	1658569	1658719	3.16	5.7	4.681e-08	2.371e-07	ADULT-BIASED
chr1	1660652	1660802	1.54	4.23	3.649e-05	0.0001055	ADULT-BIASED
chr1	1661745	1661895	2.08	4.88	2.286e-06	8.461e-06	ADULT-BIASED
chr1	1662412	1662562	1.44	2.41	0.01695	0.02658	ADULT-BIASED
chr1	1663924	1664074	1.78	6.45	9.846e-10	6.58e-09	ADULT-BIASED
chr1	1666631	1666781	1.82	3.67	0.0003189	0.0007491	ADULT-BIASED
chr1	1669261	1669411	2.85	6.59	4.632e-10	3.254e-09	ADULT-BIASED
chr1	1671697	1671847	1.42	4.36	2.209e-05	6.689e-05	ADULT-BIASED
chr1	1672523	1672673	-2.53	-6.74	1.984e-10	1.473e-09	FETAL-BIASED
chr1	1673398	1673548	1.47	2.75	0.006657	0.01149	ADULT-BIASED
chr1	1674064	1674214	1.85	6.47	8.854e-10	5.96e-09	ADULT-BIASED
chr1	1677499	1677649	-1.03	-2.34	0.02046	0.03148	FETAL-BIASED
chr1	1680468	1680618	1.44	4.05	7.431e-05	0.0002009	ADULT-BIASED
chr1	1681515	1681665	2.07	6.87	9.793e-11	7.609e-10	ADULT-BIASED
chr1	1681881	1682031	2.17	3.67	0.0003146	0.0007401	ADULT-BIASED
chr1	1687131	1687281	2.84	5.43	1.769e-07	8.084e-07	ADULT-BIASED
chr1	1687835	1687985	1.6	4.34	2.367e-05	7.122e-05	ADULT-BIASED
chr1	1688343	1688493	1.59	4.41	1.768e-05	5.462e-05	ADULT-BIASED
chr1	1690617	1690767	0.71	4.04	7.889e-05	0.0002122	ADULT-BIASED
chr1	1693036	1693186	2.15	5.12	7.854e-07	3.183e-06	ADULT-BIASED
chr1	1693325	1693475	1.72	4.09	6.527e-05	0.0001786	ADULT-BIASED
chr1	1693607	1693757	1.29	5.14	7.198e-07	2.939e-06	ADULT-BIASED
chr1	1694513	1694663	1.28	5.58	8.463e-08	4.096e-07	ADULT-BIASED
chr1	1695655	1695805	1.24	6.86	1.021e-10	7.913e-10	ADULT-BIASED
chr1	1696498	1696648	1.29	4.6	7.876e-06	2.616e-05	ADULT-BIASED
chr1	1697045	1697195	1.22	2.33	0.02093	0.03213	ADULT-BIASED
chr1	1700612	1700762	1.99	3.37	0.0009093	0.001925	ADULT-BIASED
chr1	1705353	1705503	1.6	6.8	1.473e-10	1.115e-09	ADULT-BIASED
chr1	1705960	1706110	1.88	5.15	6.891e-07	2.824e-06	ADULT-BIASED
chr1	1707360	1707510	0.68	2.4	0.01721	0.02695	ADULT-BIASED
chr1	1713953	1714103	-0.3	-2.47	0.01428	0.0228	FETAL-BIASED
chr1	1716489	1716639	0.78	2.75	0.006495	0.01124	ADULT-BIASED
chr1	1716966	1717116	1.12	5.7	4.689e-08	2.374e-07	ADULT-BIASED
chr1	1717215	1717365	0.9	4.36	2.209e-05	6.688e-05	ADULT-BIASED
chr1	1718883	1719033	0.91	4.05	7.581e-05	0.0002046	ADULT-BIASED
chr1	1719719	1719869	-1.22	-7.98	1.588e-13	1.789e-12	FETAL-BIASED
chr1	1720147	1720297	0.85	4.55	9.749e-06	3.178e-05	ADULT-BIASED
chr1	1721388	1721538	0.9	5.32	3.062e-07	1.34e-06	ADULT-BIASED
chr1	1721925	1722075	0.35	2.32	0.02123	0.03253	ADULT-BIASED
chr1	1722945	1723095	1.26	4.17	4.795e-05	0.0001352	ADULT-BIASED
chr1	1724843	1724993	0.92	3	0.003093	0.005779	ADULT-BIASED
chr1	1725373	1725523	1.36	5.03	1.181e-06	4.622e-06	ADULT-BIASED
chr1	1726682	1726832	0.99	4.42	1.706e-05	5.287e-05	ADULT-BIASED
chr1	1727699	1727849	0.87	3.47	0.0006493	0.001422	ADULT-BIASED
chr1	1728225	1728375	1.37	6.11	5.837e-09	3.445e-08	ADULT-BIASED
chr1	1736589	1736739	1.62	2.86	0.004728	0.008456	ADULT-BIASED
chr1	1740777	1740927	0.82	2.64	0.00914	0.01528	ADULT-BIASED
chr1	1744258	1744408	0.81	2.34	0.02052	0.03156	ADULT-BIASED
chr1	1747389	1747539	0.6	2.65	0.008871	0.01487	ADULT-BIASED
chr1	1752583	1752733	1.31	3.61	0.0003912	0.0009007	ADULT-BIASED
chr1	1758631	1758781	-0.5	-2.7	0.007677	0.01306	FETAL-BIASED
chr1	1764035	1764185	0.52	2.62	0.009528	0.01586	ADULT-BIASED
chr1	1764469	1764619	-1	-6.12	5.7e-09	3.369e-08	FETAL-BIASED
chr1	1765355	1765505	-0.46	-2.34	0.02029	0.03123	FETAL-BIASED
chr1	1767600	1767750	0.53	2.23	0.02667	0.03993	ADULT-BIASED
chr1	1774371	1774521	-1.26	-7.23	1.313e-11	1.154e-10	FETAL-BIASED
chr1	1778589	1778739	-2.07	-19.97	1.079e-47	4.046e-45	FETAL-BIASED
chr1	1778847	1778997	-1.82	-9.6	6.671e-18	1.215e-16	FETAL-BIASED
chr1	1782427	1782577	1.58	2.52	0.01276	0.02061	ADULT-BIASED
chr1	1783137	1783287	1.66	3.68	0.0003063	0.0007224	ADULT-BIASED
chr1	1788843	1788993	0.41	2.41	0.01702	0.02668	ADULT-BIASED
chr1	1790127	1790277	-1.55	-8.38	1.394e-14	1.776e-13	FETAL-BIASED
chr1	1790816	1790966	-1.52	-6.62	3.942e-10	2.799e-09	FETAL-BIASED
chr1	1792378	1792528	1.84	3.04	0.00269	0.005097	ADULT-BIASED
chr1	1794809	1794959	0.55	2.4	0.01745	0.02728	ADULT-BIASED
chr1	1800874	1801024	-0.58	-4.48	1.296e-05	4.117e-05	FETAL-BIASED
chr1	1802923	1803073	1.13	2.44	0.01567	0.02476	ADULT-BIASED
chr1	1803980	1804130	0.8	2.58	0.01073	0.01764	ADULT-BIASED
chr1	1804653	1804803	-3.29	-5.13	7.242e-07	2.956e-06	FETAL-BIASED
chr1	1809953	1810103	1.45	5.06	1.031e-06	4.084e-06	ADULT-BIASED
chr1	1810172	1810322	0.99	3.43	0.0007411	0.001601	ADULT-BIASED
chr1	1816120	1816270	1.94	2.87	0.004544	0.00816	ADULT-BIASED
chr1	1820905	1821055	-1.42	-7.88	2.856e-13	3.121e-12	FETAL-BIASED
chr1	1822318	1822468	-1	-3.71	0.0002741	0.0006535	FETAL-BIASED
chr1	1822757	1822907	-0.58	-3.57	0.0004496	0.001021	FETAL-BIASED
chr1	1828733	1828883	-1.61	-9.68	3.831e-18	7.141e-17	FETAL-BIASED
chr1	1830585	1830735	1.73	4.91	1.992e-06	7.46e-06	ADULT-BIASED
chr1	1833197	1833347	1.6	6.24	3.067e-09	1.895e-08	ADULT-BIASED
chr1	1834527	1834677	1.74	5.76	3.497e-08	1.81e-07	ADULT-BIASED
chr1	1835499	1835649	1.73	2.73	0.006965	0.01197	ADULT-BIASED
chr1	1840527	1840677	-1.35	-9.64	5.054e-18	9.311e-17	FETAL-BIASED
chr1	1842649	1842799	0.64	2.13	0.03411	0.0498	ADULT-BIASED
chr1	1844713	1844863	1.11	2.67	0.008276	0.01397	ADULT-BIASED
chr1	1850287	1850437	-0.4	-2.33	0.02081	0.03196	FETAL-BIASED
chr1	1850995	1851145	-1.69	-7.8	4.784e-13	5.084e-12	FETAL-BIASED
chr1	1857527	1857677	1.62	4.55	9.872e-06	3.215e-05	ADULT-BIASED
chr1	1860179	1860329	1.91	6.38	1.459e-09	9.491e-09	ADULT-BIASED
chr1	1861486	1861636	1.89	6.01	1.007e-08	5.718e-08	ADULT-BIASED
chr1	1862526	1862676	2.54	4.9	2.091e-06	7.798e-06	ADULT-BIASED
chr1	1868023	1868173	2.11	5.78	3.127e-08	1.632e-07	ADULT-BIASED
chr1	1868616	1868766	0.73	3.11	0.002159	0.004183	ADULT-BIASED
chr1	1869153	1869303	1.84	6.27	2.573e-09	1.609e-08	ADULT-BIASED
chr1	1870824	1870974	2.15	5.99	1.084e-08	6.116e-08	ADULT-BIASED
chr1	1872813	1872963	1.71	6.89	8.903e-11	6.959e-10	ADULT-BIASED
chr1	1874762	1874912	1.38	3.48	0.0006362	0.001396	ADULT-BIASED
chr1	1875601	1875751	-1.3	-9.63	5.489e-18	1.008e-16	FETAL-BIASED
chr1	1876679	1876829	1.27	2.94	0.003735	0.006843	ADULT-BIASED
chr1	1879615	1879765	1.77	4.91	2.022e-06	7.563e-06	ADULT-BIASED
chr1	1881241	1881391	1.6	3.69	0.0002934	0.0006949	ADULT-BIASED
chr1	1881994	1882144	3.16	6.2	3.783e-09	2.302e-08	ADULT-BIASED
chr1	1884989	1885139	2.6	7.13	2.25e-11	1.915e-10	ADULT-BIASED
chr1	1886185	1886335	1.45	3.09	0.002303	0.004433	ADULT-BIASED
chr1	1888712	1888862	2.46	8.8	1.036e-15	1.498e-14	ADULT-BIASED
chr1	1891719	1891869	-1.1	-5.24	4.389e-07	1.867e-06	FETAL-BIASED
chr1	1892736	1892886	1.11	2.35	0.01979	0.03055	ADULT-BIASED
chr1	1893337	1893487	1.36	3.46	0.0006687	0.00146	ADULT-BIASED
chr1	1895446	1895596	1.77	10.1	2.505e-19	5.255e-18	ADULT-BIASED
chr1	1897053	1897203	1.99	7.13	2.305e-11	1.959e-10	ADULT-BIASED
chr1	1898828	1898978	2.62	9.92	8.522e-19	1.695e-17	ADULT-BIASED
chr1	1899873	1900023	1.92	4.85	2.676e-06	9.772e-06	ADULT-BIASED
chr1	1905379	1905529	3.12	8.5	6.772e-15	8.948e-14	ADULT-BIASED
chr1	1906983	1907133	1.54	4.67	5.791e-06	1.977e-05	ADULT-BIASED
chr1	1907585	1907735	2.31	8.16	5.397e-14	6.426e-13	ADULT-BIASED
chr1	1911326	1911476	1.91	3.25	0.001385	0.002808	ADULT-BIASED
chr1	1912393	1912543	2.35	6.23	3.141e-09	1.937e-08	ADULT-BIASED
chr1	1914427	1914577	1.58	4.21	4.077e-05	0.0001167	ADULT-BIASED
chr1	1916126	1916276	2.23	6.26	2.745e-09	1.709e-08	ADULT-BIASED
chr1	1917069	1917219	2.29	5	1.348e-06	5.218e-06	ADULT-BIASED
chr1	1918249	1918399	2.12	6.17	4.347e-09	2.62e-08	ADULT-BIASED
chr1	1919216	1919366	2.9	7.06	3.363e-11	2.793e-10	ADULT-BIASED
chr1	1919763	1919913	2.32	10.08	2.951e-19	6.146e-18	ADULT-BIASED
chr1	1921246	1921396	-2.44	-12.5	2.902e-26	1.183e-24	FETAL-BIASED
chr1	1921446	1921596	-4.22	-11.33	7.461e-23	2.189e-21	FETAL-BIASED
chr1	1922305	1922455	-2.21	-7.68	9.351e-13	9.586e-12	FETAL-BIASED
chr1	1927796	1927946	-1.89	-6.85	1.098e-10	8.468e-10	FETAL-BIASED
chr1	1931828	1931978	2.08	7.55	2.054e-12	2.013e-11	ADULT-BIASED
chr1	1932351	1932501	1.99	5.04	1.106e-06	4.353e-06	ADULT-BIASED
chr1	1933386	1933536	-2.8	-3.69	0.0002937	0.0006955	FETAL-BIASED
chr1	1935065	1935215	-1.3	-4.92	1.912e-06	7.185e-06	FETAL-BIASED
chr1	1936505	1936655	1.28	3.59	0.0004273	0.000975	ADULT-BIASED
chr1	1937803	1937953	1.76	3.24	0.001406	0.002846	ADULT-BIASED
chr1	1938701	1938851	3.23	5.72	4.272e-08	2.178e-07	ADULT-BIASED
chr1	1940999	1941149	1.79	4	9.238e-05	0.0002448	ADULT-BIASED
chr1	1942003	1942153	1.82	5.54	1.027e-07	4.893e-07	ADULT-BIASED
chr1	1942551	1942701	1.13	2.55	0.01149	0.01876	ADULT-BIASED
chr1	1943181	1943331	2.1	6.49	8.005e-10	5.424e-09	ADULT-BIASED
chr1	1944184	1944334	3.56	7.16	1.892e-11	1.628e-10	ADULT-BIASED
chr1	1944916	1945066	0.89	5.01	1.259e-06	4.904e-06	ADULT-BIASED
chr1	1945822	1945972	2.13	7.28	9.628e-12	8.62e-11	ADULT-BIASED
chr1	1946951	1947101	0.94	3.67	0.0003176	0.0007463	ADULT-BIASED
chr1	1947825	1947975	1.44	6.31	2.058e-09	1.307e-08	ADULT-BIASED
chr1	1948582	1948732	2.33	4.72	4.75e-06	1.65e-05	ADULT-BIASED
chr1	1949248	1949398	2.02	4.58	8.62e-06	2.841e-05	ADULT-BIASED
chr1	1950543	1950693	-1.29	-2.24	0.02658	0.03981	FETAL-BIASED
chr1	1951183	1951333	-1.04	-3.73	0.0002514	0.0006044	FETAL-BIASED
chr1	1954840	1954990	1.98	3.93	0.0001228	0.0003166	ADULT-BIASED
chr1	1957238	1957388	-2.72	-15.25	2.333e-34	2.149e-32	FETAL-BIASED
chr1	1962186	1962336	2.32	8.05	1.025e-13	1.181e-12	ADULT-BIASED
chr1	1967814	1967964	2.88	6.41	1.231e-09	8.103e-09	ADULT-BIASED
chr1	1970128	1970278	2.48	8.25	3.113e-14	3.811e-13	ADULT-BIASED
chr1	1970925	1971075	2.32	4.36	2.153e-05	6.533e-05	ADULT-BIASED
chr1	1971371	1971521	2.46	5.55	9.862e-08	4.716e-07	ADULT-BIASED
chr1	1972932	1973082	2.07	5.28	3.689e-07	1.591e-06	ADULT-BIASED
chr1	1974907	1975057	0.68	2.96	0.003477	0.006418	ADULT-BIASED
chr1	1976296	1976446	-1.64	-8.01	1.365e-13	1.55e-12	FETAL-BIASED
chr1	1977895	1978045	-0.81	-3.87	0.0001512	0.0003822	FETAL-BIASED
chr1	1981894	1982044	-1.04	-5.83	2.477e-08	1.315e-07	FETAL-BIASED
chr1	1983405	1983555	0.75	4.07	7.017e-05	0.0001908	ADULT-BIASED
chr1	1987379	1987529	2.08	4.17	4.782e-05	0.0001349	ADULT-BIASED
chr1	1988669	1988819	1.72	4.17	4.715e-05	0.0001332	ADULT-BIASED
chr1	1992091	1992241	2.37	5.06	1.024e-06	4.056e-06	ADULT-BIASED
chr1	1992810	1992960	0.82	2.31	0.02227	0.03397	ADULT-BIASED
chr1	1994281	1994431	2.71	4.44	1.583e-05	4.94e-05	ADULT-BIASED
chr1	1995481	1995631	2.24	4.18	4.573e-05	0.0001295	ADULT-BIASED
chr1	1997903	1998053	2.52	4.36	2.13e-05	6.471e-05	ADULT-BIASED
chr1	1998847	1998997	2.71	6.05	8.008e-09	4.62e-08	ADULT-BIASED
chr1	2000003	2000153	1.98	7.28	9.836e-12	8.795e-11	ADULT-BIASED
chr1	2001897	2002047	0.74	3.24	0.001415	0.002863	ADULT-BIASED
chr1	2007085	2007235	1.73	8.37	1.504e-14	1.909e-13	ADULT-BIASED
chr1	2008281	2008431	2.33	7.69	9.07e-13	9.314e-12	ADULT-BIASED
chr1	2009527	2009677	1.59	3.62	0.000386	0.0008898	ADULT-BIASED
chr1	2011479	2011629	1.74	5.07	9.97e-07	3.959e-06	ADULT-BIASED
chr1	2013480	2013630	2.11	6.57	5.072e-10	3.543e-09	ADULT-BIASED
chr1	2016110	2016260	1.63	4.17	4.802e-05	0.0001354	ADULT-BIASED
chr1	2017945	2018095	1.22	3.05	0.002593	0.004932	ADULT-BIASED
chr1	2018809	2018959	1.68	4.66	6.154e-06	2.09e-05	ADULT-BIASED
chr1	2019633	2019783	1.18	3.1	0.002248	0.004338	ADULT-BIASED
chr1	2020671	2020821	1.9	7.8	4.569e-13	4.867e-12	ADULT-BIASED
chr1	2024942	2025092	1.96	4.46	1.456e-05	4.576e-05	ADULT-BIASED
chr1	2026703	2026853	2.41	5.86	2.162e-08	1.159e-07	ADULT-BIASED
chr1	2028187	2028337	2.14	9.8	1.822e-18	3.509e-17	ADULT-BIASED
chr1	2029371	2029521	2.52	5.24	4.399e-07	1.871e-06	ADULT-BIASED
chr1	2029827	2029977	1.03	2.54	0.0118	0.01921	ADULT-BIASED
chr1	2033129	2033279	1.52	3.96	0.0001089	0.000284	ADULT-BIASED
chr1	2033529	2033679	2.12	8.53	5.757e-15	7.672e-14	ADULT-BIASED
chr1	2035509	2035659	1.28	3.01	0.002976	0.005582	ADULT-BIASED
chr1	2036218	2036368	-1.27	-5.06	1.007e-06	3.996e-06	FETAL-BIASED
chr1	2038876	2039026	1.22	4.31	2.692e-05	8.006e-05	ADULT-BIASED
chr1	2040103	2040253	-1.58	-8.11	7.435e-14	8.705e-13	FETAL-BIASED
chr1	2041142	2041292	2.08	4.31	2.717e-05	8.072e-05	ADULT-BIASED
chr1	2042510	2042660	2.15	7.28	9.562e-12	8.564e-11	ADULT-BIASED
chr1	2043809	2043959	1.47	3.98	0.0001003	0.0002637	ADULT-BIASED
chr1	2044891	2045041	2.06	6.98	5.471e-11	4.407e-10	ADULT-BIASED
chr1	2048457	2048607	2.53	3.92	0.000126	0.000324	ADULT-BIASED
chr1	2053283	2053433	-2.91	-6.5	7.522e-10	5.119e-09	FETAL-BIASED
chr1	2062146	2062296	0.95	2.77	0.006098	0.01063	ADULT-BIASED
chr1	2064541	2064691	-2.17	-12.11	3.876e-25	1.413e-23	FETAL-BIASED
chr1	2066797	2066947	-2.06	-8.55	5.114e-15	6.852e-14	FETAL-BIASED
chr1	2071390	2071540	-0.54	-3.32	0.001098	0.00228	FETAL-BIASED
chr1	2071572	2071722	-1.18	-6.6	4.397e-10	3.099e-09	FETAL-BIASED
chr1	2072587	2072737	0.87	3.34	0.001034	0.00216	ADULT-BIASED
chr1	2073002	2073152	2.3	4.3	2.821e-05	8.353e-05	ADULT-BIASED
chr1	2074154	2074304	2.16	8.92	4.988e-16	7.451e-15	ADULT-BIASED
chr1	2075937	2076087	2.26	6.52	6.604e-10	4.533e-09	ADULT-BIASED
chr1	2077835	2077985	1.56	3.45	0.0006982	0.001517	ADULT-BIASED
chr1	2080507	2080657	0.7	2.4	0.01743	0.02725	ADULT-BIASED
chr1	2082551	2082701	0.9	4.52	1.109e-05	3.573e-05	ADULT-BIASED
chr1	2084603	2084753	1.26	4.84	2.799e-06	1.018e-05	ADULT-BIASED
chr1	2085553	2085703	2.32	6.02	9.345e-09	5.333e-08	ADULT-BIASED
chr1	2086039	2086189	1.68	3.47	0.0006442	0.001412	ADULT-BIASED
chr1	2086275	2086425	2.01	4.93	1.85e-06	6.972e-06	ADULT-BIASED
chr1	2087075	2087225	1.42	2.87	0.004595	0.008242	ADULT-BIASED
chr1	2087425	2087575	-2.11	-4.42	1.716e-05	5.314e-05	FETAL-BIASED
chr1	2088026	2088176	1.19	3.93	0.0001211	0.0003128	ADULT-BIASED
chr1	2088579	2088729	1.13	2.62	0.009507	0.01583	ADULT-BIASED
chr1	2090815	2090965	1.89	4.2	4.131e-05	0.0001181	ADULT-BIASED
chr1	2091671	2091821	-2.04	-8.17	4.953e-14	5.925e-13	FETAL-BIASED
chr1	2093747	2093897	2.42	4.11	6.069e-05	0.0001673	ADULT-BIASED
chr1	2094599	2094749	1.38	3.45	0.0006897	0.001501	ADULT-BIASED
chr1	2095795	2095945	1.83	5.77	3.413e-08	1.77e-07	ADULT-BIASED
chr1	2097029	2097179	2.09	4.99	1.391e-06	5.371e-06	ADULT-BIASED
chr1	2097686	2097836	1.97	4.3	2.783e-05	8.251e-05	ADULT-BIASED
chr1	2098105	2098255	2.46	4.63	7.007e-06	2.352e-05	ADULT-BIASED
chr1	2099119	2099269	2.77	4.29	2.928e-05	8.637e-05	ADULT-BIASED
chr1	2099885	2100035	1.72	5.48	1.398e-07	6.509e-07	ADULT-BIASED
chr1	2100780	2100930	2.57	9.78	2.021e-18	3.874e-17	ADULT-BIASED
chr1	2101589	2101739	1.73	5.29	3.471e-07	1.504e-06	ADULT-BIASED
chr1	2102113	2102263	1.34	5.05	1.062e-06	4.195e-06	ADULT-BIASED
chr1	2102441	2102591	2.59	4.92	1.973e-06	7.395e-06	ADULT-BIASED
chr1	2104834	2104984	1.07	2.93	0.003863	0.007054	ADULT-BIASED
chr1	2105989	2106139	-0.79	-3.85	0.000161	0.0004044	FETAL-BIASED
chr1	2107346	2107496	0.86	2.28	0.02385	0.03612	ADULT-BIASED
chr1	2110519	2110669	1.48	3.76	0.0002275	0.0005524	ADULT-BIASED
chr1	2113964	2114114	1.48	2.42	0.0165	0.02594	ADULT-BIASED
chr1	2115218	2115368	0.67	2.68	0.008138	0.01376	ADULT-BIASED
chr1	2116449	2116599	0.89	2.34	0.02035	0.03132	ADULT-BIASED
chr1	2118469	2118619	1.06	2.73	0.006906	0.01188	ADULT-BIASED
chr1	2119556	2119706	1.11	2.87	0.00466	0.008346	ADULT-BIASED
chr1	2121669	2121819	-0.82	-3.47	0.0006555	0.001434	FETAL-BIASED
chr1	2124043	2124193	-0.99	-3.92	0.0001236	0.0003186	FETAL-BIASED
chr1	2126745	2126895	-1.68	-10.68	5.471e-21	1.347e-19	FETAL-BIASED
chr1	2129642	2129792	0.59	2.68	0.008083	0.01368	ADULT-BIASED
chr1	2130664	2130814	-1.45	-6.45	9.957e-10	6.648e-09	FETAL-BIASED
chr1	2131689	2131839	1.78	3.5	0.0005831	0.001291	ADULT-BIASED
chr1	2132388	2132538	1.07	2.42	0.01653	0.02599	ADULT-BIASED
chr1	2133647	2133797	1.28	3.51	0.0005576	0.00124	ADULT-BIASED
chr1	2135924	2136074	-0.73	-3.84	0.0001685	0.0004215	FETAL-BIASED
chr1	2136615	2136765	-1.04	-7.69	8.995e-13	9.241e-12	FETAL-BIASED
chr1	2145925	2146075	-0.97	-2.16	0.03193	0.04693	FETAL-BIASED
chr1	2150752	2150902	1.38	4.44	1.59e-05	4.961e-05	ADULT-BIASED
chr1	2151987	2152137	0.87	2.33	0.02085	0.03202	ADULT-BIASED
chr1	2152313	2152463	0.88	2.96	0.003539	0.00652	ADULT-BIASED
chr1	2152591	2152741	0.89	3.19	0.001654	0.003293	ADULT-BIASED
chr1	2153151	2153301	1.53	3.4	0.0008231	0.00176	ADULT-BIASED
chr1	2153773	2153923	2.55	4.29	2.955e-05	8.71e-05	ADULT-BIASED
chr1	2154101	2154251	1.58	3.24	0.001442	0.002911	ADULT-BIASED
chr1	2154982	2155132	1.71	2.72	0.007154	0.01226	ADULT-BIASED
chr1	2156171	2156321	1.36	2.94	0.003739	0.006851	ADULT-BIASED
chr1	2158607	2158757	-1.07	-4.73	4.575e-06	1.594e-05	FETAL-BIASED
chr1	2162353	2162503	-1.47	-4.57	8.918e-06	2.93e-05	FETAL-BIASED
chr1	2163273	2163423	-1.02	-7.41	4.57e-12	4.272e-11	FETAL-BIASED
chr1	2166861	2167011	1.02	3.33	0.001044	0.002179	ADULT-BIASED
chr1	2167431	2167581	1.32	3.75	0.0002353	0.0005696	ADULT-BIASED
chr1	2169768	2169918	1.27	5.71	4.513e-08	2.291e-07	ADULT-BIASED
chr1	2171599	2171749	-0.64	-2.51	0.01298	0.02092	FETAL-BIASED
chr1	2171861	2172011	-1.8	-4.87	2.441e-06	8.982e-06	FETAL-BIASED
chr1	2173661	2173811	-1.13	-4.1	6.216e-05	0.0001709	FETAL-BIASED
chr1	2176475	2176625	2.11	4.9	2.159e-06	8.03e-06	ADULT-BIASED
chr1	2177861	2178011	-1.35	-7.54	2.115e-12	2.069e-11	FETAL-BIASED
chr1	2178033	2178183	-1	-5.09	9.08e-07	3.635e-06	FETAL-BIASED
chr1	2180103	2180253	-1.36	-3.81	0.0001906	0.000471	FETAL-BIASED
chr1	2183307	2183457	-2.08	-3.98	9.93e-05	0.0002612	FETAL-BIASED
chr1	2184685	2184835	1.32	3.52	0.0005458	0.001216	ADULT-BIASED
chr1	2187021	2187171	-1.8	-7.16	1.949e-11	1.674e-10	FETAL-BIASED
chr1	2187450	2187600	-1.69	-6.49	7.752e-10	5.265e-09	FETAL-BIASED
chr1	2190507	2190657	0.65	2.18	0.03051	0.04504	ADULT-BIASED
chr1	2192113	2192263	1.4	2.4	0.01734	0.02712	ADULT-BIASED
chr1	2193902	2194052	1.57	4.19	4.389e-05	0.0001248	ADULT-BIASED
chr1	2196509	2196659	1.19	3.15	0.00193	0.003782	ADULT-BIASED
chr1	2198585	2198735	-0.89	-3.44	0.0007162	0.001552	FETAL-BIASED
chr1	2199351	2199501	1.28	3.75	0.0002353	0.0005695	ADULT-BIASED
chr1	2203807	2203957	-0.61	-2.38	0.01843	0.02865	FETAL-BIASED
chr1	2207763	2207913	-1	-3.7	0.0002866	0.0006803	FETAL-BIASED
chr1	2210585	2210735	-2.65	-7.99	1.485e-13	1.679e-12	FETAL-BIASED
chr1	2217625	2217775	0.83	2.36	0.01943	0.03004	ADULT-BIASED
chr1	2219143	2219293	1	3.15	0.001923	0.00377	ADULT-BIASED
chr1	2222610	2222760	-0.73	-3	0.003051	0.005708	FETAL-BIASED
chr1	2232418	2232568	-0.95	-3.25	0.001359	0.002761	FETAL-BIASED
chr1	2236641	2236791	-1.07	-2.54	0.01189	0.01934	FETAL-BIASED
chr1	2240347	2240497	1.51	5.94	1.387e-08	7.685e-08	ADULT-BIASED
chr1	2241013	2241163	1.47	2.73	0.006862	0.01181	ADULT-BIASED
chr1	2245551	2245701	-0.49	-3.15	0.001909	0.003745	FETAL-BIASED
chr1	2253539	2253689	-3.29	-5.2	5.272e-07	2.21e-06	FETAL-BIASED
chr1	2262207	2262357	-2.04	-7.3	8.535e-12	7.695e-11	FETAL-BIASED
chr1	2271923	2272073	1.45	3.67	0.0003231	0.000758	ADULT-BIASED
chr1	2275825	2275975	1.99	3.94	0.0001165	0.0003019	ADULT-BIASED
chr1	2277712	2277862	2.02	7.93	2.212e-13	2.45e-12	ADULT-BIASED
chr1	2278551	2278701	2.01	4.43	1.621e-05	5.048e-05	ADULT-BIASED
chr1	2280027	2280177	2.25	3.73	0.000259	0.000621	ADULT-BIASED
chr1	2282607	2282757	1.9	4.53	1.07e-05	3.458e-05	ADULT-BIASED
chr1	2284935	2285085	-1.12	-3.88	0.0001452	0.0003683	FETAL-BIASED
chr1	2288079	2288229	1.61	3.33	0.001063	0.002215	ADULT-BIASED
chr1	2290525	2290675	1.54	4.26	3.314e-05	9.67e-05	ADULT-BIASED
chr1	2291411	2291561	1.46	6.04	8.587e-09	4.929e-08	ADULT-BIASED
chr1	2293109	2293259	1.02	2.73	0.007052	0.0121	ADULT-BIASED
chr1	2299645	2299795	1.58	3.85	0.0001624	0.0004076	ADULT-BIASED
chr1	2304525	2304675	1.76	4.65	6.455e-06	2.183e-05	ADULT-BIASED
chr1	2307417	2307567	1.38	3.29	0.001215	0.002497	ADULT-BIASED
chr1	2308630	2308780	1.17	2.59	0.01025	0.01693	ADULT-BIASED
chr1	2309647	2309797	1.65	5.15	6.836e-07	2.804e-06	ADULT-BIASED
chr1	2311245	2311395	1.15	3.79	0.0002016	0.0004952	ADULT-BIASED
chr1	2313179	2313329	-1.1	-6.96	6.089e-11	4.871e-10	FETAL-BIASED
chr1	2315175	2315325	0.93	3.93	0.0001226	0.0003162	ADULT-BIASED
chr1	2315676	2315826	0.96	5.81	2.728e-08	1.438e-07	ADULT-BIASED
chr1	2315937	2316087	1.11	2.9	0.00414	0.007507	ADULT-BIASED
chr1	2317297	2317447	1.12	3.6	0.0004075	0.0009343	ADULT-BIASED
chr1	2318730	2318880	1.4	5.67	5.56e-08	2.779e-07	ADULT-BIASED
chr1	2319529	2319679	1.18	5.93	1.468e-08	8.099e-08	ADULT-BIASED
chr1	2319985	2320135	1.1	2.56	0.01134	0.01854	ADULT-BIASED
chr1	2323254	2323404	-1.74	-11.37	5.725e-23	1.698e-21	FETAL-BIASED
chr1	2323427	2323577	-0.59	-5.11	8.021e-07	3.245e-06	FETAL-BIASED
chr1	2326481	2326631	0.4	2.16	0.0323	0.04742	ADULT-BIASED
chr1	2327405	2327555	0.63	2.69	0.007819	0.01328	ADULT-BIASED
chr1	2327607	2327757	-0.92	-3.51	0.0005665	0.001257	FETAL-BIASED
chr1	2328049	2328199	1.58	8.7	1.927e-15	2.705e-14	ADULT-BIASED
chr1	2328965	2329115	1.5	4.92	1.948e-06	7.307e-06	ADULT-BIASED
chr1	2329559	2329709	1.14	3.16	0.001834	0.003613	ADULT-BIASED
chr1	2330383	2330533	1.43	6.69	2.657e-10	1.935e-09	ADULT-BIASED
chr1	2332629	2332779	-0.74	-2.45	0.01523	0.02415	FETAL-BIASED
chr1	2333693	2333843	1.17	6.91	7.693e-11	6.066e-10	ADULT-BIASED
chr1	2334797	2334947	0.44	2.24	0.02618	0.03927	ADULT-BIASED
chr1	2335661	2335811	-0.82	-7.56	1.953e-12	1.92e-11	FETAL-BIASED
chr1	2336443	2336593	-0.7	-6.11	5.838e-09	3.445e-08	FETAL-BIASED
chr1	2339457	2339607	1.93	4.75	4.182e-06	1.469e-05	ADULT-BIASED
chr1	2340417	2340567	-2.88	-26.69	9.142e-65	1.637e-61	FETAL-BIASED
chr1	2342475	2342625	0.55	2.32	0.02136	0.03272	ADULT-BIASED
chr1	2344631	2344781	-0.63	-3.71	0.000272	0.000649	FETAL-BIASED
chr1	2349369	2349519	1.35	3.37	0.0009212	0.001947	ADULT-BIASED
chr1	2361081	2361231	0.99	2.46	0.01475	0.02346	ADULT-BIASED
chr1	2366355	2366505	1.98	5.87	2.075e-08	1.116e-07	ADULT-BIASED
chr1	2371439	2371589	2.58	8.73	1.583e-15	2.243e-14	ADULT-BIASED
chr1	2382951	2383101	2.03	6.27	2.517e-09	1.576e-08	ADULT-BIASED
chr1	2391395	2391545	-2.38	-3.99	9.577e-05	0.0002528	FETAL-BIASED
chr1	2392667	2392817	2.11	5.06	1.038e-06	4.108e-06	ADULT-BIASED
chr1	2394793	2394943	-1.84	-4.13	5.612e-05	0.0001559	FETAL-BIASED
chr1	2398439	2398589	-2.48	-5.44	1.689e-07	7.747e-07	FETAL-BIASED
chr1	2399575	2399725	-2.18	-10.1	2.573e-19	5.39e-18	FETAL-BIASED
chr1	2402167	2402317	-1.78	-5.25	4.139e-07	1.768e-06	FETAL-BIASED
chr1	2404757	2404907	2.06	5.86	2.107e-08	1.132e-07	ADULT-BIASED
chr1	2406457	2406607	-1.13	-11.27	1.136e-22	3.275e-21	FETAL-BIASED
chr1	2412405	2412555	-0.76	-3.73	0.0002547	0.0006115	FETAL-BIASED
chr1	2416155	2416305	2.51	5.94	1.458e-08	8.049e-08	ADULT-BIASED
chr1	2418220	2418370	2.15	8.93	4.779e-16	7.155e-15	ADULT-BIASED
chr1	2419769	2419919	2.28	9.43	1.935e-17	3.357e-16	ADULT-BIASED
chr1	2425089	2425239	-1.49	-2.4	0.01757	0.02744	FETAL-BIASED
chr1	2426255	2426405	2.25	7.35	6.38e-12	5.85e-11	ADULT-BIASED
chr1	2441049	2441199	1.2	3.36	0.0009648	0.00203	ADULT-BIASED
chr1	2442581	2442731	1.65	4.25	3.391e-05	9.871e-05	ADULT-BIASED
chr1	2443493	2443643	1.78	3.1	0.002275	0.004384	ADULT-BIASED
chr1	2446102	2446252	1.66	6.96	5.941e-11	4.761e-10	ADULT-BIASED
chr1	2448512	2448662	2.02	4.75	4.126e-06	1.451e-05	ADULT-BIASED
chr1	2449016	2449166	2.22	5.23	4.587e-07	1.944e-06	ADULT-BIASED
chr1	2449496	2449646	2.71	8.39	1.298e-14	1.66e-13	ADULT-BIASED
chr1	2450259	2450409	1.8	2.81	0.00545	0.009605	ADULT-BIASED
chr1	2451528	2451678	2.23	6.84	1.144e-10	8.801e-10	ADULT-BIASED
chr1	2453381	2453531	0.51	2.54	0.01208	0.01962	ADULT-BIASED
chr1	2453695	2453845	1.53	7.76	5.862e-13	6.166e-12	ADULT-BIASED
chr1	2454658	2454808	1.71	5.87	2.038e-08	1.097e-07	ADULT-BIASED
chr1	2461491	2461641	-0.76	-2.69	0.007714	0.01312	FETAL-BIASED
chr1	2464361	2464511	-3.83	-3.76	0.0002286	0.0005549	FETAL-BIASED
chr1	2477347	2477497	-0.37	-2.91	0.004061	0.007378	FETAL-BIASED
chr1	2481437	2481587	1.07	2.41	0.01675	0.02629	ADULT-BIASED
chr1	2481965	2482115	0.97	2.2	0.02919	0.04329	ADULT-BIASED
chr1	2482383	2482533	2.11	4.73	4.573e-06	1.594e-05	ADULT-BIASED
chr1	2484410	2484560	2.84	8.97	3.695e-16	5.599e-15	ADULT-BIASED
chr1	2484585	2484735	1.74	3.26	0.001349	0.002742	ADULT-BIASED
chr1	2487651	2487801	-0.55	-2.58	0.01057	0.01741	FETAL-BIASED
chr1	2498822	2498972	1.75	3.95	0.0001124	0.0002923	ADULT-BIASED
chr1	2499893	2500043	1.64	2.75	0.006556	0.01134	ADULT-BIASED
chr1	2501151	2501301	1.99	5.19	5.547e-07	2.315e-06	ADULT-BIASED
chr1	2502925	2503075	1.53	4.59	8.186e-06	2.71e-05	ADULT-BIASED
chr1	2505401	2505551	0.98	2.65	0.00865	0.01454	ADULT-BIASED
chr1	2508519	2508669	1.62	3.25	0.001389	0.002815	ADULT-BIASED
chr1	2509896	2510046	-1	-6.46	9.221e-10	6.19e-09	FETAL-BIASED
chr1	2510963	2511113	1	2.84	0.005028	0.008937	ADULT-BIASED
chr1	2512284	2512434	1.38	3.27	0.00127	0.002598	ADULT-BIASED
chr1	2513045	2513195	0.58	2.51	0.01284	0.02072	ADULT-BIASED
chr1	2517564	2517714	-0.63	-2.62	0.009538	0.01587	FETAL-BIASED
chr1	2519290	2519440	0.81	2.46	0.01475	0.02346	ADULT-BIASED
chr1	2523149	2523299	1.77	3.3	0.001164	0.002403	ADULT-BIASED
chr1	2525533	2525683	-1.54	-12.1	4.209e-25	1.529e-23	FETAL-BIASED
chr1	2528713	2528863	1.51	4.42	1.684e-05	5.225e-05	ADULT-BIASED
chr1	2531825	2531975	2.56	6.1	6.1e-09	3.588e-08	ADULT-BIASED
chr1	2533395	2533545	1.96	8.74	1.491e-15	2.119e-14	ADULT-BIASED
chr1	2536721	2536871	1.67	3.55	0.0004973	0.001118	ADULT-BIASED
chr1	2539085	2539235	-1.48	-2.5	0.01323	0.02129	FETAL-BIASED
chr1	2540965	2541115	1.7	7.18	1.71e-11	1.481e-10	ADULT-BIASED
chr1	2542281	2542431	-1.37	-3.97	0.0001035	0.0002713	FETAL-BIASED
chr1	2548070	2548220	1.54	4.07	6.983e-05	0.0001899	ADULT-BIASED
chr1	2548994	2549144	1.78	5	1.371e-06	5.299e-06	ADULT-BIASED
chr1	2550619	2550769	2.33	5.18	5.797e-07	2.411e-06	ADULT-BIASED
chr1	2553103	2553253	2.52	4.22	3.848e-05	0.0001107	ADULT-BIASED
chr1	2554001	2554151	2.47	3.98	0.0001007	0.0002646	ADULT-BIASED
chr1	2555353	2555503	2	5.38	2.318e-07	1.037e-06	ADULT-BIASED
chr1	2556251	2556401	1.93	4.5	1.223e-05	3.907e-05	ADULT-BIASED
chr1	2556829	2556979	2.77	5.41	1.937e-07	8.789e-07	ADULT-BIASED
chr1	2557365	2557515	1.61	3.18	0.001744	0.003455	ADULT-BIASED
chr1	2561419	2561569	1.53	5.58	8.815e-08	4.253e-07	ADULT-BIASED
chr1	2564952	2565102	0.79	2.59	0.01034	0.01706	ADULT-BIASED
chr1	2566769	2566919	1.66	3.92	0.0001231	0.0003173	ADULT-BIASED
chr1	2567831	2567981	1.4	4.79	3.381e-06	1.21e-05	ADULT-BIASED
chr1	2568293	2568443	-0.8	-4.23	3.732e-05	0.0001077	FETAL-BIASED
chr1	2569053	2569203	0.79	2.78	0.006052	0.01055	ADULT-BIASED
chr1	2570942	2571092	0.48	2.15	0.03273	0.04798	ADULT-BIASED
chr1	2574467	2574617	-1.62	-8.59	3.865e-15	5.251e-14	FETAL-BIASED
chr1	2580354	2580504	1.74	4.73	4.586e-06	1.598e-05	ADULT-BIASED
chr1	2584051	2584201	3.1	5.87	2e-08	1.079e-07	ADULT-BIASED
chr1	2587303	2587453	0.73	2.77	0.006178	0.01075	ADULT-BIASED
chr1	2615645	2615795	2.72	8.11	7.4e-14	8.667e-13	ADULT-BIASED
chr1	2616972	2617122	2.13	3.46	0.0006769	0.001476	ADULT-BIASED
chr1	2617921	2618071	1.65	3.35	0.0009947	0.002086	ADULT-BIASED
chr1	2621127	2621277	2.62	5.28	3.658e-07	1.578e-06	ADULT-BIASED
chr1	2624087	2624237	1.78	2.79	0.005905	0.01032	ADULT-BIASED
chr1	2624659	2624809	2.44	3.91	0.0001321	0.0003383	ADULT-BIASED
chr1	2626335	2626485	2.03	3.5	0.000578	0.001281	ADULT-BIASED
chr1	2629093	2629243	1.29	6.08	7.04e-09	4.099e-08	ADULT-BIASED
chr1	2629536	2629686	2.49	4.61	7.597e-06	2.532e-05	ADULT-BIASED
chr1	2694647	2694797	-1.52	-2.59	0.01047	0.01726	FETAL-BIASED
chr1	2700142	2700292	3.07	12.02	7.487e-25	2.661e-23	ADULT-BIASED
chr1	2702961	2703111	1.27	4.84	2.709e-06	9.88e-06	ADULT-BIASED
chr1	2703265	2703415	-1.07	-5.48	1.394e-07	6.491e-07	FETAL-BIASED
chr1	2705296	2705446	1.97	4.32	2.532e-05	7.571e-05	ADULT-BIASED
chr1	2706487	2706637	1.6	2.37	0.01862	0.02891	ADULT-BIASED
chr1	2707565	2707715	3.45	7.15	2.073e-11	1.774e-10	ADULT-BIASED
chr1	2708099	2708249	1.68	5.38	2.306e-07	1.032e-06	ADULT-BIASED
chr1	2709367	2709517	2.29	7.35	6.588e-12	6.031e-11	ADULT-BIASED
chr1	2711999	2712149	1.74	4.52	1.119e-05	3.603e-05	ADULT-BIASED
chr1	2713571	2713721	1.79	8.52	5.956e-15	7.923e-14	ADULT-BIASED
chr1	2714949	2715099	2.32	4.04	7.811e-05	0.0002103	ADULT-BIASED
chr1	2715631	2715781	2.33	6.55	5.598e-10	3.885e-09	ADULT-BIASED
chr1	2719616	2719766	2.22	5.97	1.222e-08	6.835e-08	ADULT-BIASED
chr1	2725940	2726090	2.65	7.39	5.195e-12	4.821e-11	ADULT-BIASED
chr1	2729421	2729571	2.63	9.19	8.782e-17	1.421e-15	ADULT-BIASED
chr1	2731033	2731183	2.82	11.46	3.034e-23	9.247e-22	ADULT-BIASED
chr1	2732221	2732371	2.35	8.12	6.971e-14	8.19e-13	ADULT-BIASED
chr1	2733119	2733269	2.28	9.01	2.859e-16	4.382e-15	ADULT-BIASED
chr1	2734484	2734634	1.85	7.47	3.168e-12	3.027e-11	ADULT-BIASED
chr1	2735124	2735274	1.24	5.14	6.932e-07	2.84e-06	ADULT-BIASED
chr1	2736251	2736401	1.63	4.07	6.932e-05	0.0001887	ADULT-BIASED
chr1	2738257	2738407	0.94	2.18	0.03074	0.04534	ADULT-BIASED
chr1	2738501	2738651	-1.48	-4.82	2.969e-06	1.075e-05	FETAL-BIASED
chr1	2741979	2742129	2.19	4.25	3.394e-05	9.879e-05	ADULT-BIASED
chr1	2744381	2744531	2.39	4.89	2.198e-06	8.162e-06	ADULT-BIASED
chr1	2745281	2745431	2.72	11.34	6.945e-23	2.043e-21	ADULT-BIASED
chr1	2746717	2746867	2.66	8.58	4.129e-15	5.591e-14	ADULT-BIASED
chr1	2748602	2748752	1.19	3.92	0.000127	0.0003264	ADULT-BIASED
chr1	2751241	2751391	3.31	8.08	8.551e-14	9.943e-13	ADULT-BIASED
chr1	2753205	2753355	1.99	4.72	4.669e-06	1.624e-05	ADULT-BIASED
chr1	2754317	2754467	1.34	3.78	0.0002142	0.0005233	ADULT-BIASED
chr1	2757172	2757322	1.64	4.33	2.425e-05	7.279e-05	ADULT-BIASED
chr1	2758407	2758557	2.88	5.78	3.134e-08	1.635e-07	ADULT-BIASED
chr1	2761843	2761993	1.99	4.11	6.023e-05	0.0001661	ADULT-BIASED
chr1	2762466	2762616	1.6	3.12	0.002131	0.004135	ADULT-BIASED
chr1	2764187	2764337	0.74	2.56	0.01136	0.01857	ADULT-BIASED
chr1	2765758	2765908	1.28	3.04	0.002696	0.005107	ADULT-BIASED
chr1	2766588	2766738	1.26	4.19	4.352e-05	0.0001238	ADULT-BIASED
chr1	2767175	2767325	1.47	4.69	5.401e-06	1.855e-05	ADULT-BIASED
chr1	2767697	2767847	1.95	6.77	1.732e-10	1.297e-09	ADULT-BIASED
chr1	2768093	2768243	2.42	8.64	2.877e-15	3.962e-14	ADULT-BIASED
chr1	2774763	2774913	2.3	5.63	6.652e-08	3.28e-07	ADULT-BIASED
chr1	2782124	2782274	1.33	4.59	8.307e-06	2.746e-05	ADULT-BIASED
chr1	2788664	2788814	1.88	5.43	1.786e-07	8.156e-07	ADULT-BIASED
chr1	2798017	2798167	1.77	6.18	4.164e-09	2.516e-08	ADULT-BIASED
chr1	2807646	2807796	2.5	7.32	7.734e-12	7.014e-11	ADULT-BIASED
chr1	2810746	2810896	2.02	5.35	2.688e-07	1.189e-06	ADULT-BIASED
chr1	2814313	2814463	2.23	5.6	7.712e-08	3.76e-07	ADULT-BIASED
chr1	2817437	2817587	1.83	7.38	5.481e-12	5.073e-11	ADULT-BIASED
chr1	2821599	2821749	3.24	8	1.428e-13	1.617e-12	ADULT-BIASED
chr1	2822729	2822879	-2.95	-6	1.036e-08	5.868e-08	FETAL-BIASED
chr1	2828263	2828413	-1.16	-4.79	3.451e-06	1.232e-05	FETAL-BIASED
chr1	2831387	2831537	-1.72	-7.26	1.122e-11	9.954e-11	FETAL-BIASED
chr1	2833289	2833439	1.48	6.03	8.92e-09	5.107e-08	ADULT-BIASED
chr1	2833984	2834134	2.13	4.12	5.817e-05	0.000161	ADULT-BIASED
chr1	2834641	2834791	1.84	4.98	1.479e-06	5.679e-06	ADULT-BIASED
chr1	2835097	2835247	1.53	4.38	2.011e-05	6.14e-05	ADULT-BIASED
chr1	2835962	2836112	1.04	2.25	0.02539	0.03821	ADULT-BIASED
chr1	2837337	2837487	2.19	7.5	2.705e-12	2.609e-11	ADULT-BIASED
chr1	2840323	2840473	1.93	4.06	7.301e-05	0.0001977	ADULT-BIASED
chr1	2842555	2842705	-1.7	-4.09	6.366e-05	0.0001747	FETAL-BIASED
chr1	2843425	2843575	2.83	7.75	6.179e-13	6.479e-12	ADULT-BIASED
chr1	2845329	2845479	-2.69	-9.1	1.557e-16	2.453e-15	FETAL-BIASED
chr1	2850180	2850330	2.11	6.85	1.106e-10	8.523e-10	ADULT-BIASED
chr1	2854388	2854538	1.6	3.59	0.0004268	0.000974	ADULT-BIASED
chr1	2855491	2855641	1.62	3.52	0.0005524	0.001229	ADULT-BIASED
chr1	2856473	2856623	1.81	7.85	3.577e-13	3.862e-12	ADULT-BIASED
chr1	2858205	2858355	2.88	7.7	8.338e-13	8.601e-12	ADULT-BIASED
chr1	2859147	2859297	1.54	4.99	1.389e-06	5.363e-06	ADULT-BIASED
chr1	2860683	2860833	2.08	7.37	5.71e-12	5.272e-11	ADULT-BIASED
chr1	2861715	2861865	1.44	4.4	1.869e-05	5.743e-05	ADULT-BIASED
chr1	2862740	2862890	2.77	8.01	1.304e-13	1.483e-12	ADULT-BIASED
chr1	2863737	2863887	1.28	6.68	2.822e-10	2.048e-09	ADULT-BIASED
chr1	2865183	2865333	2.09	5.03	1.16e-06	4.548e-06	ADULT-BIASED
chr1	2868690	2868840	-1.38	-2.84	0.005007	0.008903	FETAL-BIASED
chr1	2875568	2875718	1.88	4.18	4.443e-05	0.0001262	ADULT-BIASED
chr1	2876028	2876178	2.07	6.12	5.725e-09	3.383e-08	ADULT-BIASED
chr1	2877607	2877757	2.6	6.09	6.546e-09	3.832e-08	ADULT-BIASED
chr1	2878521	2878671	2.1	6.1	6.157e-09	3.619e-08	ADULT-BIASED
chr1	2879628	2879778	1.39	4.75	4.192e-06	1.472e-05	ADULT-BIASED
chr1	2879969	2880119	2.73	5.14	7.209e-07	2.943e-06	ADULT-BIASED
chr1	2880772	2880922	2.11	6.54	6.129e-10	4.228e-09	ADULT-BIASED
chr1	2882427	2882577	2.11	8.04	1.127e-13	1.293e-12	ADULT-BIASED
chr1	2883463	2883613	-2.21	-5.56	9.587e-08	4.594e-07	FETAL-BIASED
chr1	2884133	2884283	1.64	4.38	1.997e-05	6.101e-05	ADULT-BIASED
chr1	2885207	2885357	-2.11	-5.9	1.75e-08	9.529e-08	FETAL-BIASED
chr1	2887993	2888143	1.39	3.57	0.00045	0.001021	ADULT-BIASED
chr1	2891747	2891897	1.52	3.23	0.001479	0.002979	ADULT-BIASED
chr1	2892475	2892625	-3.15	-8.09	8.431e-14	9.811e-13	FETAL-BIASED
chr1	2900023	2900173	1.11	3.37	0.000911	0.001928	ADULT-BIASED
chr1	2901177	2901327	0.98	3.67	0.0003154	0.0007417	ADULT-BIASED
chr1	2901785	2901935	-1.44	-4.99	1.378e-06	5.324e-06	FETAL-BIASED
chr1	2903571	2903721	2.23	6.3	2.237e-09	1.413e-08	ADULT-BIASED
chr1	2906865	2907015	1.67	4.03	8.172e-05	0.0002191	ADULT-BIASED
chr1	2908951	2909101	1.67	5.68	5.373e-08	2.693e-07	ADULT-BIASED
chr1	2914671	2914821	1.71	6.91	7.868e-11	6.196e-10	ADULT-BIASED
chr1	2915259	2915409	1.57	2.79	0.005839	0.01022	ADULT-BIASED
chr1	2915677	2915827	1.47	6.2	3.752e-09	2.285e-08	ADULT-BIASED
chr1	2919519	2919669	2.46	6.42	1.177e-09	7.771e-09	ADULT-BIASED
chr1	2925095	2925245	0.91	2.46	0.01492	0.0237	ADULT-BIASED
chr1	2925701	2925851	1.98	8.44	9.981e-15	1.293e-13	ADULT-BIASED
chr1	2929169	2929319	-1.58	-6.64	3.459e-10	2.477e-09	FETAL-BIASED
chr1	2936553	2936703	1.63	3.74	0.0002441	0.0005887	ADULT-BIASED
chr1	2941337	2941487	2.41	4.43	1.618e-05	5.038e-05	ADULT-BIASED
chr1	2944299	2944449	2.41	5.42	1.888e-07	8.584e-07	ADULT-BIASED
chr1	2948217	2948367	0.92	4.73	4.397e-06	1.538e-05	ADULT-BIASED
chr1	2952255	2952405	-2.4	-5.69	5.098e-08	2.565e-07	FETAL-BIASED
chr1	2955244	2955394	1.59	3.7	0.0002891	0.0006857	ADULT-BIASED
chr1	2956675	2956825	2.02	4.98	1.477e-06	5.674e-06	ADULT-BIASED
chr1	2957365	2957515	2.11	5	1.344e-06	5.204e-06	ADULT-BIASED
chr1	2959161	2959311	2.48	5.6	7.701e-08	3.755e-07	ADULT-BIASED
chr1	2960255	2960405	1.5	6.13	5.313e-09	3.157e-08	ADULT-BIASED
chr1	2965822	2965972	3.06	9.62	5.668e-18	1.039e-16	ADULT-BIASED
chr1	2966933	2967083	1.36	3.45	0.0007033	0.001527	ADULT-BIASED
chr1	2967689	2967839	3.23	8.68	2.25e-15	3.137e-14	ADULT-BIASED
chr1	2968209	2968359	3.19	5.4	2.097e-07	9.456e-07	ADULT-BIASED
chr1	2982847	2982997	-2.02	-12.52	2.401e-26	9.865e-25	FETAL-BIASED
chr1	2986433	2986583	-1.5	-4.22	3.916e-05	0.0001125	FETAL-BIASED
chr1	2988843	2988993	-1.27	-2.8	0.005643	0.00991	FETAL-BIASED
chr1	2989503	2989653	-1.41	-3.24	0.001412	0.002858	FETAL-BIASED
chr1	3000202	3000352	0.51	2.22	0.02773	0.04135	ADULT-BIASED
chr1	3004153	3004303	0.68	2.62	0.009424	0.0157	ADULT-BIASED
chr1	3012897	3013047	1.46	4.41	1.79e-05	5.523e-05	ADULT-BIASED
chr1	3017845	3017995	-0.91	-3.48	0.0006243	0.001372	FETAL-BIASED
chr1	3022177	3022327	-3.09	-6.06	7.585e-09	4.393e-08	FETAL-BIASED
chr1	3028510	3028660	-0.93	-3	0.003073	0.005745	FETAL-BIASED
chr1	3029532	3029682	0.75	3.86	0.0001567	0.0003947	ADULT-BIASED
chr1	3043507	3043657	-1.13	-2.88	0.004417	0.007956	FETAL-BIASED
chr1	3043907	3044057	-1.46	-5.15	6.763e-07	2.776e-06	FETAL-BIASED
chr1	3048257	3048407	0.98	2.21	0.02835	0.04217	ADULT-BIASED
chr1	3057017	3057167	-0.62	-2.88	0.00448	0.008057	FETAL-BIASED
chr1	3061397	3061547	1.48	4.52	1.127e-05	3.627e-05	ADULT-BIASED
chr1	3063465	3063615	1.36	3.24	0.001399	0.002833	ADULT-BIASED
chr1	3064697	3064847	1.59	5.05	1.07e-06	4.223e-06	ADULT-BIASED
chr1	3066371	3066521	1.12	3.15	0.001919	0.003763	ADULT-BIASED
chr1	3068080	3068230	1.34	3.1	0.002208	0.004269	ADULT-BIASED
chr1	3069519	3069669	1.28	2.85	0.00483	0.008619	ADULT-BIASED
chr1	3071919	3072069	-1.03	-2.51	0.01282	0.02069	FETAL-BIASED
chr1	3074230	3074380	0.91	4.18	4.598e-05	0.0001302	ADULT-BIASED
chr1	3074694	3074844	1.02	2.38	0.01829	0.02846	ADULT-BIASED
chr1	3075843	3075993	0.62	2.62	0.009493	0.0158	ADULT-BIASED
chr1	3077938	3078088	-1.74	-3.76	0.0002308	0.0005596	FETAL-BIASED
chr1	3081367	3081517	1.1	2.54	0.01188	0.01933	ADULT-BIASED
chr1	3083239	3083389	1.22	4.27	3.098e-05	9.096e-05	ADULT-BIASED
chr1	3096061	3096211	1.4	2.97	0.003409	0.006306	ADULT-BIASED
chr1	3103442	3103592	-0.56	-2.68	0.008075	0.01367	FETAL-BIASED
chr1	3104139	3104289	-0.86	-2.44	0.01576	0.0249	FETAL-BIASED
chr1	3110017	3110167	1.92	3.9	0.0001348	0.0003444	ADULT-BIASED
chr1	3115255	3115405	-1.52	-6.2	3.756e-09	2.287e-08	FETAL-BIASED
chr1	3119493	3119643	2.06	5.19	5.683e-07	2.367e-06	ADULT-BIASED
chr1	3126060	3126210	1.54	3.26	0.001345	0.002735	ADULT-BIASED
chr1	3126891	3127041	1.22	2.61	0.009689	0.0161	ADULT-BIASED
chr1	3128657	3128807	-3.15	-2.44	0.01556	0.02461	FETAL-BIASED
chr1	3136095	3136245	-1.41	-5.99	1.081e-08	6.102e-08	FETAL-BIASED
chr1	3138579	3138729	-1.34	-4.36	2.142e-05	6.503e-05	FETAL-BIASED
chr1	3142597	3142747	0.9	2.29	0.02329	0.03536	ADULT-BIASED
chr1	3143295	3143445	-1.48	-3.71	0.0002781	0.0006621	FETAL-BIASED
chr1	3145268	3145418	1.3	4.12	5.784e-05	0.0001602	ADULT-BIASED
chr1	3147348	3147498	0.96	4.53	1.046e-05	3.388e-05	ADULT-BIASED
chr1	3149929	3150079	1.81	3.93	0.00012	0.0003101	ADULT-BIASED
chr1	3152635	3152785	0.97	2.73	0.006873	0.01183	ADULT-BIASED
chr1	3154943	3155093	-5.34	-4.54	1.027e-05	3.334e-05	FETAL-BIASED
chr1	3157069	3157219	-3.33	-4.68	5.565e-06	1.906e-05	FETAL-BIASED
chr1	3157456	3157606	-4.96	-4.38	2.022e-05	6.169e-05	FETAL-BIASED
chr1	3163133	3163283	1.1	2.28	0.024	0.03631	ADULT-BIASED
chr1	3164219	3164369	-1.68	-5.71	4.489e-08	2.281e-07	FETAL-BIASED
chr1	3165509	3165659	-1.03	-4.17	4.703e-05	0.0001328	FETAL-BIASED
chr1	3172329	3172479	2.31	7.05	3.569e-11	2.954e-10	ADULT-BIASED
chr1	3175051	3175201	-2.31	-7.15	2.056e-11	1.76e-10	FETAL-BIASED
chr1	3176143	3176293	1.71	5.13	7.395e-07	3.013e-06	ADULT-BIASED
chr1	3179303	3179453	2.37	5.59	8.133e-08	3.949e-07	ADULT-BIASED
chr1	3181805	3181955	1.28	3.04	0.002682	0.005084	ADULT-BIASED
chr1	3182797	3182947	1.11	2.46	0.01496	0.02375	ADULT-BIASED
chr1	3183203	3183353	1.54	3.28	0.001264	0.002586	ADULT-BIASED
chr1	3184289	3184439	1.37	3.53	0.0005273	0.001179	ADULT-BIASED
chr1	3187648	3187798	-0.41	-3.22	0.001543	0.003094	FETAL-BIASED
chr1	3197249	3197399	1.25	3.86	0.0001557	0.0003925	ADULT-BIASED
chr1	3200331	3200481	-1.1	-3.89	0.0001386	0.0003531	FETAL-BIASED
chr1	3200761	3200911	-1.51	-6.37	1.519e-09	9.85e-09	FETAL-BIASED
chr1	3207303	3207453	0.85	2.87	0.004618	0.008279	ADULT-BIASED
chr1	3217523	3217673	1.47	4.74	4.377e-06	1.531e-05	ADULT-BIASED
chr1	3218243	3218393	2.2	5.68	5.222e-08	2.623e-07	ADULT-BIASED
chr1	3219315	3219465	1.41	4.01	8.973e-05	0.0002384	ADULT-BIASED
chr1	3220224	3220374	1.15	3.53	0.0005222	0.001169	ADULT-BIASED
chr1	3221831	3221981	1.14	3.94	0.0001158	0.0003003	ADULT-BIASED
chr1	3223459	3223609	1.4	4.3	2.785e-05	8.256e-05	ADULT-BIASED
chr1	3223791	3223941	0.79	2.47	0.0146	0.02325	ADULT-BIASED
chr1	3233170	3233320	-1.49	-4.32	2.53e-05	7.565e-05	FETAL-BIASED
chr1	3236385	3236535	-0.61	-2.3	0.02245	0.03421	FETAL-BIASED
chr1	3236663	3236813	-1.99	-9.39	2.573e-17	4.402e-16	FETAL-BIASED
chr1	3239847	3239997	-2.12	-7.41	4.487e-12	4.2e-11	FETAL-BIASED
chr1	3245328	3245478	-1.75	-4.5	1.205e-05	3.853e-05	FETAL-BIASED
chr1	3253896	3254046	-2.46	-4.96	1.577e-06	6.026e-06	FETAL-BIASED
chr1	3258889	3259039	1.12	2.69	0.007883	0.01338	ADULT-BIASED
chr1	3260553	3260703	1.75	3.53	0.0005346	0.001193	ADULT-BIASED
chr1	3266317	3266467	-2.44	-5.56	9.34e-08	4.485e-07	FETAL-BIASED
chr1	3274691	3274841	1.6	4.34	2.373e-05	7.137e-05	ADULT-BIASED
chr1	3281333	3281483	1.06	3.03	0.002801	0.005286	ADULT-BIASED
chr1	3282741	3282891	-2	-5.12	7.776e-07	3.154e-06	FETAL-BIASED
chr1	3284206	3284356	-3.74	-4.89	2.202e-06	8.177e-06	FETAL-BIASED
chr1	3286421	3286571	-1.36	-5.05	1.067e-06	4.211e-06	FETAL-BIASED
chr1	3291862	3292012	0.95	3.43	0.0007492	0.001617	ADULT-BIASED
chr1	3300547	3300697	1.23	2.19	0.02993	0.04428	ADULT-BIASED
chr1	3304093	3304243	1.55	4.37	2.045e-05	6.233e-05	ADULT-BIASED
chr1	3304449	3304599	1.57	2.8	0.005659	0.009936	ADULT-BIASED
chr1	3305657	3305807	1.01	2.58	0.01073	0.01765	ADULT-BIASED
chr1	3306931	3307081	1.91	4.8	3.342e-06	1.197e-05	ADULT-BIASED
chr1	3307624	3307774	1.4	2.52	0.01265	0.02045	ADULT-BIASED
chr1	3309429	3309579	-1.97	-4.26	3.281e-05	9.58e-05	FETAL-BIASED
chr1	3310414	3310564	-1.79	-6.42	1.135e-09	7.509e-09	FETAL-BIASED
chr1	3312096	3312246	1.29	5.19	5.616e-07	2.342e-06	ADULT-BIASED
chr1	3313083	3313233	1.41	2.85	0.00485	0.008651	ADULT-BIASED
chr1	3314022	3314172	1.02	2.78	0.005923	0.01035	ADULT-BIASED
chr1	3315930	3316080	2.04	4.63	6.963e-06	2.339e-05	ADULT-BIASED
chr1	3318905	3319055	-2.13	-8.48	7.682e-15	1.008e-13	FETAL-BIASED
chr1	3326595	3326745	-1.85	-5.48	1.397e-07	6.504e-07	FETAL-BIASED
chr1	3342212	3342362	1.15	3.08	0.002363	0.004536	ADULT-BIASED
chr1	3342877	3343027	1.74	4.3	2.796e-05	8.285e-05	ADULT-BIASED
chr1	3343947	3344097	2.01	7.13	2.311e-11	1.964e-10	ADULT-BIASED
chr1	3347355	3347505	1.94	6.47	8.85e-10	5.958e-09	ADULT-BIASED
chr1	3350416	3350566	1.74	6.54	6.01e-10	4.152e-09	ADULT-BIASED
chr1	3351285	3351435	1.55	3.32	0.001083	0.002252	ADULT-BIASED
chr1	3352335	3352485	1.05	3.4	0.0008185	0.001751	ADULT-BIASED
chr1	3353391	3353541	1.46	3.5	0.0005911	0.001307	ADULT-BIASED
chr1	3354399	3354549	0.84	2.61	0.009746	0.01618	ADULT-BIASED
chr1	3355355	3355505	1.06	3.07	0.002465	0.004712	ADULT-BIASED
chr1	3357003	3357153	1.39	2.49	0.01382	0.02213	ADULT-BIASED
chr1	3357747	3357897	-1.4	-3.52	0.0005361	0.001197	FETAL-BIASED
chr1	3359055	3359205	1.05	3.12	0.002134	0.004141	ADULT-BIASED
chr1	3359946	3360096	0.79	2.17	0.0316	0.04648	ADULT-BIASED
chr1	3360245	3360395	3.05	6.04	8.61e-09	4.942e-08	ADULT-BIASED
chr1	3360823	3360973	1.56	4.79	3.447e-06	1.231e-05	ADULT-BIASED
chr1	3361429	3361579	1.76	3.07	0.002468	0.004717	ADULT-BIASED
chr1	3367785	3367935	0.89	3.78	0.0002157	0.0005265	ADULT-BIASED
chr1	3371809	3371959	-0.65	-2.58	0.0106	0.01744	FETAL-BIASED
chr1	3383441	3383591	1.74	5.94	1.409e-08	7.797e-08	ADULT-BIASED
chr1	3388267	3388417	-0.92	-3.65	0.0003462	0.0008067	FETAL-BIASED
chr1	3390245	3390395	-1.45	-3.07	0.002436	0.004663	FETAL-BIASED
chr1	3401543	3401693	1.02	2.42	0.01671	0.02624	ADULT-BIASED
chr1	3408155	3408305	-1.33	-5.54	1.039e-07	4.95e-07	FETAL-BIASED
chr1	3416763	3416913	1.76	7.82	4.258e-13	4.553e-12	ADULT-BIASED
chr1	3418708	3418858	-2.11	-12.89	1.96e-27	8.951e-26	FETAL-BIASED
chr1	3426527	3426677	2.68	12.17	2.684e-25	9.924e-24	ADULT-BIASED
chr1	3429458	3429608	1.95	5.69	4.995e-08	2.517e-07	ADULT-BIASED
chr1	3438843	3438993	1.92	5.17	6.004e-07	2.49e-06	ADULT-BIASED
chr1	3456755	3456905	-1.12	-3.93	0.0001211	0.0003127	FETAL-BIASED
chr1	3458635	3458785	-1.24	-2.68	0.008132	0.01376	FETAL-BIASED
chr1	3462483	3462633	-2.35	-6.07	7.455e-09	4.322e-08	FETAL-BIASED
chr1	3467176	3467326	-2.14	-6.07	7.227e-09	4.2e-08	FETAL-BIASED
chr1	3470241	3470391	-1	-4.13	5.619e-05	0.0001561	FETAL-BIASED
chr1	3471057	3471207	1.87	4.39	1.958e-05	5.992e-05	ADULT-BIASED
chr1	3475802	3475952	1.29	2.42	0.01647	0.0259	ADULT-BIASED
chr1	3476283	3476433	3.54	6.18	4.064e-09	2.461e-08	ADULT-BIASED
chr1	3477687	3477837	0.85	2.49	0.01362	0.02185	ADULT-BIASED
chr1	3481929	3482079	-1.11	-4.26	3.308e-05	9.653e-05	FETAL-BIASED
chr1	3483731	3483881	1.53	4.99	1.4e-06	5.403e-06	ADULT-BIASED
chr1	3489145	3489295	2.37	5.55	9.88e-08	4.723e-07	ADULT-BIASED
chr1	3491800	3491950	1.86	5.59	8.366e-08	4.053e-07	ADULT-BIASED
chr1	3492535	3492685	1.01	2.63	0.009169	0.01532	ADULT-BIASED
chr1	3493213	3493363	0.99	2.4	0.0175	0.02735	ADULT-BIASED
chr1	3496647	3496797	1.25	2.69	0.007714	0.01312	ADULT-BIASED
chr1	3498113	3498263	-1.49	-3.87	0.0001513	0.0003825	FETAL-BIASED
chr1	3501151	3501301	1.8	4.98	1.439e-06	5.539e-06	ADULT-BIASED
chr1	3503240	3503390	1.16	3.42	0.0007746	0.001666	ADULT-BIASED
chr1	3503919	3504069	-1.54	-3.95	0.0001102	0.0002871	FETAL-BIASED
chr1	3504523	3504673	1.79	3.05	0.00264	0.005013	ADULT-BIASED
chr1	3505253	3505403	1.14	3.2	0.001649	0.003284	ADULT-BIASED
chr1	3505913	3506063	2.1	4.94	1.727e-06	6.547e-06	ADULT-BIASED
chr1	3507297	3507447	-0.6	-2.25	0.02584	0.03881	FETAL-BIASED
chr1	3510659	3510809	1.41	3.06	0.002568	0.004889	ADULT-BIASED
chr1	3514926	3515076	-4.07	-3.82	0.0001863	0.0004613	FETAL-BIASED
chr1	3517362	3517512	2.02	5.77	3.344e-08	1.736e-07	ADULT-BIASED
chr1	3520303	3520453	-2.04	-3.27	0.001296	0.002645	FETAL-BIASED
chr1	3522329	3522479	1.94	5.55	9.836e-08	4.705e-07	ADULT-BIASED
chr1	3527843	3527993	-1.64	-4.62	7.249e-06	2.426e-05	FETAL-BIASED
chr1	3531820	3531970	-1.05	-5.03	1.195e-06	4.672e-06	FETAL-BIASED
chr1	3532661	3532811	1.1	2.33	0.02077	0.0319	ADULT-BIASED
chr1	3533481	3533631	0.8	2.58	0.01058	0.01743	ADULT-BIASED
chr1	3535581	3535731	-2.43	-8.37	1.547e-14	1.962e-13	FETAL-BIASED
chr1	3537827	3537977	-1.49	-5.68	5.302e-08	2.66e-07	FETAL-BIASED
chr1	3539167	3539317	0.83	2.14	0.03331	0.04875	ADULT-BIASED
chr1	3540995	3541145	-0.94	-6.39	1.386e-09	9.05e-09	FETAL-BIASED
chr1	3541581	3541731	-1	-6.36	1.588e-09	1.027e-08	FETAL-BIASED
chr1	3544189	3544339	1.58	6.2	3.797e-09	2.31e-08	ADULT-BIASED
chr1	3544567	3544717	1.75	6.52	6.889e-10	4.715e-09	ADULT-BIASED
chr1	3545101	3545251	0.98	5.24	4.423e-07	1.88e-06	ADULT-BIASED
chr1	3545533	3545683	1.29	3.33	0.001047	0.002185	ADULT-BIASED
chr1	3546552	3546702	1.05	2.97	0.003366	0.006234	ADULT-BIASED
chr1	3547859	3548009	1.26	2.59	0.01042	0.01719	ADULT-BIASED
chr1	3549121	3549271	1.48	2.83	0.005166	0.009156	ADULT-BIASED
chr1	3549632	3549782	1.84	5.09	8.727e-07	3.505e-06	ADULT-BIASED
chr1	3550919	3551069	1.87	8.86	7.137e-16	1.049e-14	ADULT-BIASED
chr1	3553295	3553445	1.87	5.97	1.223e-08	6.843e-08	ADULT-BIASED
chr1	3553809	3553959	1.81	6.89	9.017e-11	7.042e-10	ADULT-BIASED
chr1	3554813	3554963	1.24	3.02	0.002922	0.00549	ADULT-BIASED
chr1	3555337	3555487	2.22	5.72	4.402e-08	2.239e-07	ADULT-BIASED
chr1	3555725	3555875	2.22	8.86	7.015e-16	1.032e-14	ADULT-BIASED
chr1	3556182	3556332	2.3	5.77	3.35e-08	1.739e-07	ADULT-BIASED
chr1	3556785	3556935	1.94	6.66	3.186e-10	2.295e-09	ADULT-BIASED
chr1	3557231	3557381	2.4	4.5	1.214e-05	3.881e-05	ADULT-BIASED
chr1	3557877	3558027	2.03	8.72	1.739e-15	2.454e-14	ADULT-BIASED
chr1	3559595	3559745	0.79	2.31	0.0222	0.03387	ADULT-BIASED
chr1	3559923	3560073	1.12	4.17	4.703e-05	0.0001329	ADULT-BIASED
chr1	3562369	3562519	2.49	7.25	1.144e-11	1.014e-10	ADULT-BIASED
chr1	3563244	3563394	1.65	5.32	3.05e-07	1.335e-06	ADULT-BIASED
chr1	3563942	3564092	2.12	6.41	1.224e-09	8.059e-09	ADULT-BIASED
chr1	3571223	3571373	-1.46	-2.21	0.02801	0.04172	FETAL-BIASED
chr1	3573193	3573343	1.93	5.5	1.274e-07	5.974e-07	ADULT-BIASED
chr1	3573765	3573915	1.96	7.61	1.454e-12	1.454e-11	ADULT-BIASED
chr1	3574597	3574747	1.43	6.23	3.242e-09	1.995e-08	ADULT-BIASED
chr1	3575819	3575969	2.16	5.55	9.958e-08	4.758e-07	ADULT-BIASED
chr1	3578693	3578843	2.15	4.66	6.169e-06	2.095e-05	ADULT-BIASED
chr1	3579259	3579409	2.39	6.85	1.097e-10	8.463e-10	ADULT-BIASED
chr1	3579791	3579941	1.28	5.69	5.005e-08	2.522e-07	ADULT-BIASED
chr1	3580973	3581123	1.45	3.22	0.001497	0.003012	ADULT-BIASED
chr1	3583451	3583601	1.54	3.1	0.002267	0.00437	ADULT-BIASED
chr1	3584739	3584889	1.32	2.66	0.008395	0.01415	ADULT-BIASED
chr1	3585425	3585575	-1.55	-15.76	7.931e-36	8.599e-34	FETAL-BIASED
chr1	3586035	3586185	1.49	3.21	0.001585	0.003171	ADULT-BIASED
chr1	3589365	3589515	1.66	3.65	0.000338	0.0007895	ADULT-BIASED
chr1	3593007	3593157	1.65	5.55	9.911e-08	4.737e-07	ADULT-BIASED
chr1	3594273	3594423	1.35	2.36	0.01949	0.03013	ADULT-BIASED
chr1	3595349	3595499	1.89	6.43	1.087e-09	7.216e-09	ADULT-BIASED
chr1	3603417	3603567	1.7	5.95	1.384e-08	7.672e-08	ADULT-BIASED
chr1	3612341	3612491	-0.75	-5.4	2.062e-07	9.31e-07	FETAL-BIASED
chr1	3614208	3614358	2.05	7.98	1.608e-13	1.81e-12	ADULT-BIASED
chr1	3617679	3617829	2.18	8.09	8.073e-14	9.415e-13	ADULT-BIASED
chr1	3619469	3619619	1.49	3.89	0.000139	0.000354	ADULT-BIASED
chr1	3621755	3621905	1.31	3.74	0.0002453	0.0005912	ADULT-BIASED
chr1	3625787	3625937	1.15	3.04	0.002681	0.005082	ADULT-BIASED
chr1	3629751	3629901	-1.87	-4.17	4.782e-05	0.0001349	FETAL-BIASED
chr1	3634638	3634788	-1.53	-6.09	6.614e-09	3.869e-08	FETAL-BIASED
chr1	3637460	3637610	1.58	3.74	0.0002507	0.000603	ADULT-BIASED
chr1	3641037	3641187	-1.67	-8.94	4.393e-16	6.602e-15	FETAL-BIASED
chr1	3641845	3641995	2.04	4.84	2.714e-06	9.896e-06	ADULT-BIASED
chr1	3643150	3643300	2.13	3.85	0.0001633	0.0004096	ADULT-BIASED
chr1	3643949	3644099	-1.04	-6.96	5.883e-11	4.717e-10	FETAL-BIASED
chr1	3651268	3651418	1.64	4.23	3.699e-05	0.0001068	ADULT-BIASED
chr1	3652925	3653075	1.59	4.37	2.097e-05	6.378e-05	ADULT-BIASED
chr1	3653412	3653562	1.88	7.94	1.975e-13	2.199e-12	ADULT-BIASED
chr1	3654092	3654242	2.67	4.75	4.083e-06	1.437e-05	ADULT-BIASED
chr1	3654991	3655141	2.05	5.34	2.698e-07	1.193e-06	ADULT-BIASED
chr1	3657376	3657526	2.06	4.32	2.537e-05	7.583e-05	ADULT-BIASED
chr1	3658994	3659144	1.81	5.42	1.837e-07	8.371e-07	ADULT-BIASED
chr1	3660497	3660647	1.65	6.48	8.448e-10	5.705e-09	ADULT-BIASED
chr1	3660875	3661025	1.55	2.52	0.01272	0.02055	ADULT-BIASED
chr1	3664444	3664594	0.68	2.52	0.01276	0.02061	ADULT-BIASED
chr1	3664745	3664895	1.31	2.86	0.004662	0.00835	ADULT-BIASED
chr1	3667719	3667869	2.07	6.75	1.921e-10	1.429e-09	ADULT-BIASED
chr1	3669192	3669342	2.23	7.8	4.644e-13	4.944e-12	ADULT-BIASED
chr1	3670510	3670660	2.37	5.44	1.685e-07	7.73e-07	ADULT-BIASED
chr1	3671757	3671907	1.99	4.66	6.225e-06	2.112e-05	ADULT-BIASED
chr1	3673269	3673419	1.25	3.3	0.001171	0.002415	ADULT-BIASED
chr1	3674887	3675037	1.97	3.1	0.002253	0.004347	ADULT-BIASED
chr1	3675230	3675380	1.49	4.83	2.863e-06	1.039e-05	ADULT-BIASED
chr1	3676515	3676665	1.36	5.11	8.276e-07	3.339e-06	ADULT-BIASED
chr1	3679075	3679225	2.09	7.39	5.155e-12	4.786e-11	ADULT-BIASED
chr1	3683144	3683294	2.48	6.18	4.199e-09	2.537e-08	ADULT-BIASED
chr1	3684039	3684189	2.21	7.87	3.031e-13	3.302e-12	ADULT-BIASED
chr1	3685286	3685436	1.47	3.25	0.001383	0.002804	ADULT-BIASED
chr1	3697185	3697335	1.07	2.64	0.008922	0.01495	ADULT-BIASED
chr1	3697651	3697801	1.59	4.38	1.992e-05	6.087e-05	ADULT-BIASED
chr1	3698473	3698623	1.32	3.2	0.001639	0.003267	ADULT-BIASED
chr1	3699573	3699723	1.22	2.28	0.02357	0.03573	ADULT-BIASED
chr1	3700703	3700853	1.55	4.47	1.356e-05	4.291e-05	ADULT-BIASED
chr1	3701719	3701869	-2.7	-25.49	6.588e-62	9.418e-59	FETAL-BIASED
chr1	3701918	3702068	-2.89	-23.76	1.225e-57	1.185e-54	FETAL-BIASED
chr1	3702121	3702271	-1.98	-18.31	4.073e-43	9.564e-41	FETAL-BIASED
chr1	3702919	3703069	2.16	3.64	0.0003591	0.0008337	ADULT-BIASED
chr1	3703641	3703791	2.25	9.68	3.95e-18	7.355e-17	ADULT-BIASED
chr1	3705550	3705700	-1.77	-2.49	0.01366	0.02191	FETAL-BIASED
chr1	3706171	3706321	1.19	3.53	0.0005184	0.001161	ADULT-BIASED
chr1	3706667	3706817	-2.74	-4.24	3.517e-05	0.000102	FETAL-BIASED
chr1	3710286	3710436	0.78	3.76	0.0002249	0.0005467	ADULT-BIASED
chr1	3711087	3711237	3.05	7.66	1.09e-12	1.107e-11	ADULT-BIASED
chr1	3712792	3712942	-1.03	-5.11	8.121e-07	3.282e-06	FETAL-BIASED
chr1	3713043	3713193	-1.95	-11.61	1.178e-23	3.73e-22	FETAL-BIASED
chr1	3715897	3716047	3.05	5.34	2.817e-07	1.241e-06	ADULT-BIASED
chr1	3721719	3721869	2.02	5.56	9.711e-08	4.648e-07	ADULT-BIASED
chr1	3726173	3726323	1.36	2.8	0.005731	0.01005	ADULT-BIASED
chr1	3726625	3726775	1.38	3.67	0.0003222	0.0007561	ADULT-BIASED
chr1	3727857	3728007	0.98	5.13	7.256e-07	2.961e-06	ADULT-BIASED
chr1	3729067	3729217	2.14	3.43	0.0007403	0.0016	ADULT-BIASED
chr1	3730741	3730891	2.03	8.53	5.489e-15	7.331e-14	ADULT-BIASED
chr1	3731623	3731773	1.47	3.72	0.0002673	0.0006387	ADULT-BIASED
chr1	3732908	3733058	2.1	3.94	0.0001166	0.000302	ADULT-BIASED
chr1	3734397	3734547	1.77	3.51	0.0005718	0.001268	ADULT-BIASED
chr1	3737585	3737735	-1.48	-2.17	0.03116	0.0459	FETAL-BIASED
chr1	3737976	3738126	-1.18	-2.22	0.02792	0.0416	FETAL-BIASED
chr1	3738497	3738647	0.97	3.83	0.000176	0.0004382	ADULT-BIASED
chr1	3739053	3739203	1.76	4.09	6.551e-05	0.0001792	ADULT-BIASED
chr1	3739939	3740089	1.85	5.32	3.101e-07	1.356e-06	ADULT-BIASED
chr1	3741204	3741354	1.52	5.23	4.564e-07	1.935e-06	ADULT-BIASED
chr1	3741981	3742131	1.5	4.23	3.738e-05	0.0001078	ADULT-BIASED
chr1	3742800	3742950	2.01	8.42	1.134e-14	1.46e-13	ADULT-BIASED
chr1	3744656	3744806	1.34	5.15	6.67e-07	2.741e-06	ADULT-BIASED
chr1	3746125	3746275	1.59	5.34	2.771e-07	1.222e-06	ADULT-BIASED
chr1	3747046	3747196	2.63	5.16	6.535e-07	2.69e-06	ADULT-BIASED
chr1	3747479	3747629	2.05	7.5	2.735e-12	2.636e-11	ADULT-BIASED
chr1	3754803	3754953	2.08	3.51	0.0005583	0.001241	ADULT-BIASED
chr1	3755445	3755595	1.18	2.5	0.01333	0.02142	ADULT-BIASED
chr1	3757823	3757973	1.81	5.51	1.235e-07	5.805e-07	ADULT-BIASED
chr1	3758159	3758309	1.87	7.63	1.286e-12	1.294e-11	ADULT-BIASED
chr1	3764738	3764888	2.37	6.6	4.437e-10	3.125e-09	ADULT-BIASED
chr1	3767123	3767273	2.01	4.19	4.421e-05	0.0001256	ADULT-BIASED
chr1	3768793	3768943	2.05	6.86	1.072e-10	8.282e-10	ADULT-BIASED
chr1	3770653	3770803	1.38	3.36	0.0009576	0.002017	ADULT-BIASED
chr1	3774204	3774354	-0.63	-4.64	6.764e-06	2.278e-05	FETAL-BIASED
chr1	3777339	3777489	2.72	5.12	7.685e-07	3.12e-06	ADULT-BIASED
chr1	3778221	3778371	2.39	5.6	7.874e-08	3.833e-07	ADULT-BIASED
chr1	3779389	3779539	2.29	4.02	8.623e-05	0.00023	ADULT-BIASED
chr1	3781321	3781471	1.23	3.33	0.001053	0.002197	ADULT-BIASED
chr1	3782473	3782623	1.48	3.79	0.0002041	0.0005009	ADULT-BIASED
chr1	3783204	3783354	2.54	6.74	2.026e-10	1.502e-09	ADULT-BIASED
chr1	3783794	3783944	1.71	4.85	2.631e-06	9.621e-06	ADULT-BIASED
chr1	3784920	3785070	1.86	3.44	0.00071	0.00154	ADULT-BIASED
chr1	3787430	3787580	2.71	7.13	2.292e-11	1.949e-10	ADULT-BIASED
chr1	3788371	3788521	1.97	5.87	2.012e-08	1.085e-07	ADULT-BIASED
chr1	3789368	3789518	2.49	7.48	3.048e-12	2.919e-11	ADULT-BIASED
chr1	3793413	3793563	2.36	6.98	5.467e-11	4.404e-10	ADULT-BIASED
chr1	3794046	3794196	2.5	4.24	3.514e-05	0.000102	ADULT-BIASED
chr1	3795165	3795315	2.57	5.46	1.516e-07	7.01e-07	ADULT-BIASED
chr1	3797302	3797452	1.45	5.94	1.425e-08	7.883e-08	ADULT-BIASED
chr1	3800217	3800367	1.23	4.55	9.807e-06	3.195e-05	ADULT-BIASED
chr1	3801642	3801792	1.59	5.93	1.496e-08	8.244e-08	ADULT-BIASED
chr1	3803415	3803565	0.81	2.21	0.0287	0.04264	ADULT-BIASED
chr1	3805022	3805172	0.98	3.75	0.0002391	0.0005778	ADULT-BIASED
chr1	3807225	3807375	1.58	3.69	0.0003002	0.0007094	ADULT-BIASED
chr1	3808201	3808351	1.67	6.26	2.76e-09	1.718e-08	ADULT-BIASED
chr1	3811285	3811435	2.06	7.01	4.436e-11	3.622e-10	ADULT-BIASED
chr1	3811630	3811780	1.55	3.24	0.001406	0.002845	ADULT-BIASED
chr1	3811921	3812071	1.43	4.31	2.678e-05	7.966e-05	ADULT-BIASED
chr1	3812594	3812744	1.03	3.58	0.0004333	0.0009873	ADULT-BIASED
chr1	3813103	3813253	0.58	2.15	0.03274	0.04799	ADULT-BIASED
chr1	3816958	3817108	-1.93	-10.93	1.092e-21	2.871e-20	FETAL-BIASED
chr1	3819237	3819387	-0.92	-2.85	0.004817	0.008599	FETAL-BIASED
chr1	3820443	3820593	0.91	2.23	0.02672	0.04	ADULT-BIASED
chr1	3822062	3822212	1.48	3.33	0.001049	0.002188	ADULT-BIASED
chr1	3822816	3822966	1.33	2.82	0.005302	0.009371	ADULT-BIASED
chr1	3825537	3825687	1.48	6.82	1.317e-10	1.004e-09	ADULT-BIASED
chr1	3826327	3826477	1.16	2.83	0.005153	0.009135	ADULT-BIASED
chr1	3827729	3827879	-1.56	-6.48	8.447e-10	5.704e-09	FETAL-BIASED
chr1	3831485	3831635	1.83	7.69	8.784e-13	9.036e-12	ADULT-BIASED
chr1	3833249	3833399	1.8	5.91	1.628e-08	8.916e-08	ADULT-BIASED
chr1	3834509	3834659	2.65	8.82	9.357e-16	1.359e-14	ADULT-BIASED
chr1	3835229	3835379	2.19	4.45	1.491e-05	4.676e-05	ADULT-BIASED
chr1	3835993	3836143	1.47	4.78	3.672e-06	1.304e-05	ADULT-BIASED
chr1	3837360	3837510	2.73	4.89	2.218e-06	8.231e-06	ADULT-BIASED
chr1	3837885	3838035	1.53	3.95	0.000113	0.0002937	ADULT-BIASED
chr1	3838845	3838995	1.61	2.73	0.007035	0.01208	ADULT-BIASED
chr1	3839625	3839775	1.43	3.98	0.000101	0.0002652	ADULT-BIASED
chr1	3843877	3844027	-3.46	-4.93	1.836e-06	6.923e-06	FETAL-BIASED
chr1	3998379	3998529	2.17	8.6	3.646e-15	4.969e-14	ADULT-BIASED
chr1	3998995	3999145	2.07	6.64	3.471e-10	2.486e-09	ADULT-BIASED
chr1	3999815	3999965	2.13	5.47	1.486e-07	6.884e-07	ADULT-BIASED
chr1	4000603	4000753	-1.26	-3.5	0.0005923	0.001309	FETAL-BIASED
chr1	4000963	4001113	-1.23	-2.16	0.03191	0.04689	FETAL-BIASED
chr1	4001693	4001843	1.53	3.09	0.002344	0.004504	ADULT-BIASED
chr1	4003914	4004064	1.31	3.08	0.002356	0.004524	ADULT-BIASED
chr1	4006023	4006173	1.84	7.45	3.621e-12	3.433e-11	ADULT-BIASED
chr1	4007501	4007651	1.87	4.25	3.461e-05	0.0001006	ADULT-BIASED
chr1	4008211	4008361	2.14	7.83	3.828e-13	4.118e-12	ADULT-BIASED
chr1	4008929	4009079	3.18	9.11	1.461e-16	2.308e-15	ADULT-BIASED
chr1	4013369	4013519	1.68	2.96	0.003484	0.006429	ADULT-BIASED
chr1	4013881	4014031	1.67	5.6	7.967e-08	3.874e-07	ADULT-BIASED
chr1	4015497	4015647	1.76	5.68	5.393e-08	2.702e-07	ADULT-BIASED
chr1	4017683	4017833	1.54	2.85	0.004866	0.008678	ADULT-BIASED
chr1	4019537	4019687	1.26	2.61	0.009859	0.01635	ADULT-BIASED
chr1	4021574	4021724	2.19	3.62	0.0003832	0.000884	ADULT-BIASED
chr1	4022387	4022537	2.32	4.74	4.356e-06	1.525e-05	ADULT-BIASED
chr1	4023429	4023579	1.9	7.96	1.85e-13	2.068e-12	ADULT-BIASED
chr1	4024477	4024627	2.22	6.52	6.739e-10	4.62e-09	ADULT-BIASED
chr1	4024807	4024957	2.61	5.11	8.202e-07	3.312e-06	ADULT-BIASED
chr1	4025838	4025988	2.19	6.27	2.574e-09	1.609e-08	ADULT-BIASED
chr1	4026225	4026375	2.87	9.47	1.536e-17	2.693e-16	ADULT-BIASED
chr1	4026993	4027143	2.91	6.63	3.779e-10	2.691e-09	ADULT-BIASED
chr1	4028195	4028345	2.59	6.32	2.015e-09	1.281e-08	ADULT-BIASED
chr1	4030823	4030973	1.29	3.82	0.0001853	0.0004592	ADULT-BIASED
chr1	4031457	4031607	1.92	6.47	8.633e-10	5.822e-09	ADULT-BIASED
chr1	4031701	4031851	1.07	4.7	5.11e-06	1.764e-05	ADULT-BIASED
chr1	4033527	4033677	2.93	5.79	3.005e-08	1.573e-07	ADULT-BIASED
chr1	4034747	4034897	1.75	5.84	2.38e-08	1.267e-07	ADULT-BIASED
chr1	4035572	4035722	2.19	6.24	2.976e-09	1.842e-08	ADULT-BIASED
chr1	4036435	4036585	1.41	4.1	6.129e-05	0.0001688	ADULT-BIASED
chr1	4037954	4038104	2.27	4.27	3.128e-05	9.175e-05	ADULT-BIASED
chr1	4039009	4039159	-0.75	-4.48	1.311e-05	4.161e-05	FETAL-BIASED
chr1	4039603	4039753	1.16	3.85	0.0001652	0.000414	ADULT-BIASED
chr1	4041091	4041241	2.36	8.15	5.888e-14	6.979e-13	ADULT-BIASED
chr1	4041491	4041641	0.69	2.66	0.00845	0.01424	ADULT-BIASED
chr1	4042226	4042376	1.31	6.29	2.299e-09	1.449e-08	ADULT-BIASED
chr1	4043037	4043187	1.9	4.42	1.674e-05	5.197e-05	ADULT-BIASED
chr1	4043429	4043579	1.25	2.91	0.004067	0.007387	ADULT-BIASED
chr1	4044793	4044943	1.73	6.21	3.424e-09	2.098e-08	ADULT-BIASED
chr1	4047480	4047630	1.84	7.62	1.352e-12	1.357e-11	ADULT-BIASED
chr1	4052857	4053007	2.67	7.27	1.026e-11	9.149e-11	ADULT-BIASED
chr1	4054306	4054456	1.42	5.32	3.083e-07	1.348e-06	ADULT-BIASED
chr1	4055315	4055465	2.47	6.54	6.095e-10	4.207e-09	ADULT-BIASED
chr1	4056377	4056527	2.21	7.4	4.845e-12	4.515e-11	ADULT-BIASED
chr1	4057119	4057269	2.68	6.15	4.86e-09	2.906e-08	ADULT-BIASED
chr1	4058144	4058294	1.59	5.2	5.299e-07	2.22e-06	ADULT-BIASED
chr1	4058915	4059065	0.86	2.15	0.03264	0.04786	ADULT-BIASED
chr1	4059407	4059557	1.84	3.27	0.001269	0.002595	ADULT-BIASED
chr1	4059909	4060059	2.74	4.57	9.17e-06	3.005e-05	ADULT-BIASED
chr1	4060121	4060271	2.25	4.35	2.25e-05	6.8e-05	ADULT-BIASED
chr1	4061114	4061264	-2.08	-5.79	3.044e-08	1.592e-07	FETAL-BIASED
chr1	4062659	4062809	1.66	6.98	5.267e-11	4.254e-10	ADULT-BIASED
chr1	4064255	4064405	2.22	9.09	1.654e-16	2.599e-15	ADULT-BIASED
chr1	4064947	4065097	2.62	6.33	1.824e-09	1.169e-08	ADULT-BIASED
chr1	4066573	4066723	2.27	8.16	5.435e-14	6.47e-13	ADULT-BIASED
chr1	4068161	4068311	1.76	6.57	5.211e-10	3.633e-09	ADULT-BIASED
chr1	4069489	4069639	2.28	7.37	5.762e-12	5.316e-11	ADULT-BIASED
chr1	4070507	4070657	3.02	7.28	9.967e-12	8.905e-11	ADULT-BIASED
chr1	4071221	4071371	1.23	3.12	0.002107	0.004093	ADULT-BIASED
chr1	4076527	4076677	1.73	3.66	0.0003295	0.0007716	ADULT-BIASED
chr1	4077841	4077991	1.93	6.35	1.679e-09	1.082e-08	ADULT-BIASED
chr1	4078830	4078980	1.18	2.55	0.01159	0.0189	ADULT-BIASED
chr1	4080353	4080503	2.56	7.65	1.148e-12	1.163e-11	ADULT-BIASED
chr1	4082905	4083055	2.26	8.34	1.754e-14	2.209e-13	ADULT-BIASED
chr1	4083906	4084056	1.35	4.87	2.405e-06	8.861e-06	ADULT-BIASED
chr1	4084372	4084522	1.55	3.91	0.000132	0.000338	ADULT-BIASED
chr1	4084641	4084791	1.34	2.27	0.02443	0.0369	ADULT-BIASED
chr1	4086956	4087106	1.99	4.59	8.17e-06	2.705e-05	ADULT-BIASED
chr1	4089383	4089533	1.89	4.16	4.968e-05	0.0001396	ADULT-BIASED
chr1	4093095	4093245	1.51	5.18	5.786e-07	2.406e-06	ADULT-BIASED
chr1	4105554	4105704	1.79	5.43	1.83e-07	8.34e-07	ADULT-BIASED
chr1	4106951	4107101	1.96	7.24	1.227e-11	1.083e-10	ADULT-BIASED
chr1	4108491	4108641	1.42	5.36	2.497e-07	1.111e-06	ADULT-BIASED
chr1	4111255	4111405	2.15	6.34	1.73e-09	1.112e-08	ADULT-BIASED
chr1	4112865	4113015	1.68	5.17	6.123e-07	2.535e-06	ADULT-BIASED
chr1	4113721	4113871	2.41	8.61	3.488e-15	4.763e-14	ADULT-BIASED
chr1	4115533	4115683	1.79	7.8	4.748e-13	5.048e-12	ADULT-BIASED
chr1	4116611	4116761	2.11	8.47	8.139e-15	1.065e-13	ADULT-BIASED
chr1	4117201	4117351	2	7.53	2.342e-12	2.276e-11	ADULT-BIASED
chr1	4118625	4118775	3.12	6.73	2.179e-10	1.608e-09	ADULT-BIASED
chr1	4122167	4122317	2.01	9.07	1.868e-16	2.918e-15	ADULT-BIASED
chr1	4127823	4127973	1.16	3.5	0.0005779	0.00128	ADULT-BIASED
chr1	4128255	4128405	1.55	4.45	1.474e-05	4.63e-05	ADULT-BIASED
chr1	4128977	4129127	1.21	4.03	8.076e-05	0.0002167	ADULT-BIASED
chr1	4131691	4131841	-1.84	-5.16	6.344e-07	2.618e-06	FETAL-BIASED
chr1	4133013	4133163	1.28	4.13	5.577e-05	0.000155	ADULT-BIASED
chr1	4134751	4134901	1.05	3.04	0.00273	0.005166	ADULT-BIASED
chr1	4136007	4136157	2.43	6.4	1.284e-09	8.426e-09	ADULT-BIASED
chr1	4136597	4136747	2.49	4.65	6.433e-06	2.176e-05	ADULT-BIASED
chr1	4137153	4137303	1.56	3.49	0.0006099	0.001344	ADULT-BIASED
chr1	4138627	4138777	2.26	3.9	0.0001367	0.0003489	ADULT-BIASED
chr1	4139987	4140137	1.94	6.23	3.214e-09	1.979e-08	ADULT-BIASED
chr1	4143443	4143593	-3.12	-6.58	4.903e-10	3.432e-09	FETAL-BIASED
chr1	4143845	4143995	-2.11	-4.4	1.827e-05	5.626e-05	FETAL-BIASED
chr1	4144969	4145119	0.62	2.21	0.02836	0.04218	ADULT-BIASED
chr1	4146625	4146775	-0.64	-2.53	0.01229	0.01993	FETAL-BIASED
chr1	4147578	4147728	1.77	3.41	0.0007887	0.001693	ADULT-BIASED
chr1	4148691	4148841	2	4.94	1.728e-06	6.551e-06	ADULT-BIASED
chr1	4150563	4150713	1.91	7.28	9.874e-12	8.827e-11	ADULT-BIASED
chr1	4152141	4152291	2.13	6.93	7.057e-11	5.594e-10	ADULT-BIASED
chr1	4153524	4153674	1.87	4.72	4.793e-06	1.663e-05	ADULT-BIASED
chr1	4154204	4154354	2.84	7.57	1.823e-12	1.799e-11	ADULT-BIASED
chr1	4154797	4154947	1.38	2.71	0.007402	0.01264	ADULT-BIASED
chr1	4156164	4156314	2.64	6.65	3.247e-10	2.335e-09	ADULT-BIASED
chr1	4157105	4157255	1.77	4.27	3.186e-05	9.328e-05	ADULT-BIASED
chr1	4161877	4162027	-1.03	-3.24	0.001419	0.002869	FETAL-BIASED
chr1	4165469	4165619	1.41	6.09	6.61e-09	3.867e-08	ADULT-BIASED
chr1	4167119	4167269	2.06	4.88	2.345e-06	8.659e-06	ADULT-BIASED
chr1	4167871	4168021	2.47	8.72	1.711e-15	2.415e-14	ADULT-BIASED
chr1	4168870	4169020	-1.3	-8.11	7.162e-14	8.402e-13	FETAL-BIASED
chr1	4169797	4169947	2.12	5.42	1.889e-07	8.591e-07	ADULT-BIASED
chr1	4171060	4171210	1.42	7.24	1.26e-11	1.11e-10	ADULT-BIASED
chr1	4171889	4172039	2.1	4.81	3.107e-06	1.12e-05	ADULT-BIASED
chr1	4172229	4172379	2.04	9.06	2.058e-16	3.202e-15	ADULT-BIASED
chr1	4173413	4173563	1.9	7.16	1.918e-11	1.649e-10	ADULT-BIASED
chr1	4175557	4175707	1.93	4.08	6.763e-05	0.0001845	ADULT-BIASED
chr1	4176513	4176663	2.29	7.45	3.692e-12	3.496e-11	ADULT-BIASED
chr1	4177210	4177360	1.88	5.45	1.657e-07	7.61e-07	ADULT-BIASED
chr1	4179057	4179207	1.77	3.23	0.001479	0.002978	ADULT-BIASED
chr1	4181337	4181487	1.4	3.4	0.0008208	0.001755	ADULT-BIASED
chr1	4182797	4182947	1.91	6.42	1.169e-09	7.722e-09	ADULT-BIASED
chr1	4183721	4183871	2.71	6.04	8.511e-09	4.889e-08	ADULT-BIASED
chr1	4183955	4184105	2.73	5.79	3.07e-08	1.604e-07	ADULT-BIASED
chr1	4184781	4184931	2.4	5.71	4.549e-08	2.309e-07	ADULT-BIASED
chr1	4188800	4188950	2.67	12.04	6.339e-25	2.268e-23	ADULT-BIASED
chr1	4191185	4191335	2.2	4.79	3.457e-06	1.234e-05	ADULT-BIASED
chr1	4191690	4191840	2.14	8.4	1.247e-14	1.599e-13	ADULT-BIASED
chr1	4192675	4192825	1.82	6.82	1.298e-10	9.9e-10	ADULT-BIASED
chr1	4193457	4193607	1.63	4.37	2.114e-05	6.426e-05	ADULT-BIASED
chr1	4197959	4198109	1.76	3.65	0.0003438	0.0008015	ADULT-BIASED
chr1	4199076	4199226	1.06	2.52	0.01245	0.02016	ADULT-BIASED
chr1	4200509	4200659	2.67	5.67	5.603e-08	2.799e-07	ADULT-BIASED
chr1	4201208	4201358	2.2	6.74	2.001e-10	1.485e-09	ADULT-BIASED
chr1	4201846	4201996	1.78	7.79	4.928e-13	5.229e-12	ADULT-BIASED
chr1	4202223	4202373	1.99	6.62	3.866e-10	2.749e-09	ADULT-BIASED
chr1	4202949	4203099	0.96	3.11	0.002158	0.004181	ADULT-BIASED
chr1	4207323	4207473	1.6	6.29	2.302e-09	1.451e-08	ADULT-BIASED
chr1	4207967	4208117	2.03	3.96	0.0001059	0.0002769	ADULT-BIASED
chr1	4209057	4209207	2.18	6.78	1.648e-10	1.238e-09	ADULT-BIASED
chr1	4210446	4210596	1.13	4.9	2.071e-06	7.727e-06	ADULT-BIASED
chr1	4213251	4213401	2.45	5.14	7.198e-07	2.939e-06	ADULT-BIASED
chr1	4216357	4216507	1.91	6.46	9.148e-10	6.145e-09	ADULT-BIASED
chr1	4216987	4217137	2.23	4.16	4.97e-05	0.0001397	ADULT-BIASED
chr1	4218115	4218265	1.99	6.87	1.004e-10	7.789e-10	ADULT-BIASED
chr1	4219137	4219287	2.08	4.4	1.836e-05	5.651e-05	ADULT-BIASED
chr1	4219890	4220040	2.82	5.41	1.959e-07	8.884e-07	ADULT-BIASED
chr1	4220405	4220555	2.8	4.45	1.484e-05	4.657e-05	ADULT-BIASED
chr1	4220779	4220929	1.37	4.99	1.42e-06	5.473e-06	ADULT-BIASED
chr1	4221509	4221659	-1.44	-3.1	0.00224	0.004324	FETAL-BIASED
chr1	4222207	4222357	1.59	5.5	1.264e-07	5.932e-07	ADULT-BIASED
chr1	4223603	4223753	1.73	5.7	4.856e-08	2.452e-07	ADULT-BIASED
chr1	4223890	4224040	1.74	6.39	1.385e-09	9.044e-09	ADULT-BIASED
chr1	4224921	4225071	1.47	3.75	0.0002415	0.0005831	ADULT-BIASED
chr1	4225843	4225993	-2.37	-5.85	2.287e-08	1.221e-07	FETAL-BIASED
chr1	4227877	4228027	1.15	3.64	0.0003497	0.0008141	ADULT-BIASED
chr1	4228707	4228857	2.15	4.29	2.923e-05	8.624e-05	ADULT-BIASED
chr1	4234633	4234783	2.56	8.17	4.976e-14	5.95e-13	ADULT-BIASED
chr1	4235287	4235437	1.98	3.75	0.0002418	0.0005837	ADULT-BIASED
chr1	4235796	4235946	0.96	3.25	0.001384	0.002806	ADULT-BIASED
chr1	4236701	4236851	2.17	4.73	4.514e-06	1.575e-05	ADULT-BIASED
chr1	4237061	4237211	0.92	2.17	0.03156	0.04643	ADULT-BIASED
chr1	4238879	4239029	1.52	4.91	2.057e-06	7.68e-06	ADULT-BIASED
chr1	4239861	4240011	1.32	3.09	0.002333	0.004486	ADULT-BIASED
chr1	4240329	4240479	2.5	8.53	5.622e-15	7.499e-14	ADULT-BIASED
chr1	4246610	4246760	1.94	4.22	3.79e-05	0.0001092	ADULT-BIASED
chr1	4249461	4249611	1.9	3.72	0.0002685	0.0006414	ADULT-BIASED
chr1	4263121	4263271	2.45	5.02	1.25e-06	4.87e-06	ADULT-BIASED
chr1	4264151	4264301	1.99	6.61	4.127e-10	2.921e-09	ADULT-BIASED
chr1	4267345	4267495	1.22	2.44	0.01568	0.02478	ADULT-BIASED
chr1	4267901	4268051	1.83	4.74	4.392e-06	1.536e-05	ADULT-BIASED
chr1	4268498	4268648	2.46	4.07	7.103e-05	0.0001928	ADULT-BIASED
chr1	4270061	4270211	2.02	7.52	2.445e-12	2.372e-11	ADULT-BIASED
chr1	4270513	4270663	1.71	5.81	2.803e-08	1.475e-07	ADULT-BIASED
chr1	4274653	4274803	1.04	4.54	1.039e-05	3.368e-05	ADULT-BIASED
chr1	4275031	4275181	0.98	3.85	0.0001607	0.0004039	ADULT-BIASED
chr1	4275917	4276067	3.24	8.67	2.374e-15	3.301e-14	ADULT-BIASED
chr1	4277851	4278001	2.1	7.7	8.641e-13	8.897e-12	ADULT-BIASED
chr1	4279300	4279450	3.16	9.66	4.381e-18	8.122e-17	ADULT-BIASED
chr1	4279962	4280112	2.4	5.06	1.014e-06	4.022e-06	ADULT-BIASED
chr1	4281273	4281423	1.53	3.27	0.00129	0.002635	ADULT-BIASED
chr1	4281669	4281819	1.5	4.18	4.615e-05	0.0001306	ADULT-BIASED
chr1	4282131	4282281	2.24	7.67	1.034e-12	1.054e-11	ADULT-BIASED
chr1	4283625	4283775	1.48	3.68	0.0003085	0.0007272	ADULT-BIASED
chr1	4284479	4284629	2.04	4.24	3.547e-05	0.0001028	ADULT-BIASED
chr1	4285300	4285450	0.86	2.94	0.003665	0.006728	ADULT-BIASED
chr1	4285723	4285873	1.8	4.46	1.431e-05	4.506e-05	ADULT-BIASED
chr1	4288195	4288345	2.27	4.23	3.743e-05	0.000108	ADULT-BIASED
chr1	4288729	4288879	2.07	8.47	7.93e-15	1.039e-13	ADULT-BIASED
chr1	4291087	4291237	1.62	3.05	0.002644	0.005019	ADULT-BIASED
chr1	4291797	4291947	2.48	6.75	1.974e-10	1.465e-09	ADULT-BIASED
chr1	4293351	4293501	1.42	2.8	0.005707	0.01001	ADULT-BIASED
chr1	4312066	4312216	1.16	3.91	0.0001315	0.0003368	ADULT-BIASED
chr1	4312877	4313027	1.3	4.09	6.598e-05	0.0001804	ADULT-BIASED
chr1	4315613	4315763	2.07	4.56	9.361e-06	3.062e-05	ADULT-BIASED
chr1	4318358	4318508	0.86	3.05	0.002636	0.005006	ADULT-BIASED
chr1	4318713	4318863	1.38	3.46	0.0006699	0.001462	ADULT-BIASED
chr1	4323873	4324023	1.55	4.33	2.423e-05	7.274e-05	ADULT-BIASED
chr1	4328536	4328686	2	4.17	4.772e-05	0.0001346	ADULT-BIASED
chr1	4329297	4329447	0.98	2.61	0.009785	0.01624	ADULT-BIASED
chr1	4330003	4330153	1.35	3.02	0.002858	0.005382	ADULT-BIASED
chr1	4331107	4331257	0.89	3.26	0.001316	0.002682	ADULT-BIASED
chr1	4331793	4331943	2.6	5.43	1.8e-07	8.216e-07	ADULT-BIASED
chr1	4332445	4332595	1.8	6.22	3.279e-09	2.016e-08	ADULT-BIASED
chr1	4333913	4334063	1.35	4.14	5.386e-05	0.0001502	ADULT-BIASED
chr1	4335364	4335514	2.13	4.83	2.841e-06	1.032e-05	ADULT-BIASED
chr1	4336087	4336237	2.58	6.09	6.721e-09	3.927e-08	ADULT-BIASED
chr1	4336286	4336436	2.08	5.13	7.555e-07	3.072e-06	ADULT-BIASED
chr1	4339009	4339159	1.44	5.49	1.319e-07	6.166e-07	ADULT-BIASED
chr1	4341027	4341177	2.41	8.16	5.345e-14	6.367e-13	ADULT-BIASED
chr1	4343325	4343475	2.66	6.08	6.806e-09	3.973e-08	ADULT-BIASED
chr1	4343733	4343883	2.09	5.6	7.805e-08	3.801e-07	ADULT-BIASED
chr1	4353864	4354014	1.64	6.58	4.897e-10	3.428e-09	ADULT-BIASED
chr1	4355667	4355817	1.51	4.36	2.211e-05	6.693e-05	ADULT-BIASED
chr1	4357977	4358127	2.3	4.23	3.733e-05	0.0001077	ADULT-BIASED
chr1	4359377	4359527	2.02	5.7	4.875e-08	2.46e-07	ADULT-BIASED
chr1	4360041	4360191	1.39	5.61	7.42e-08	3.629e-07	ADULT-BIASED
chr1	4361327	4361477	2.51	7.91	2.411e-13	2.658e-12	ADULT-BIASED
chr1	4362367	4362517	2.34	9.03	2.464e-16	3.801e-15	ADULT-BIASED
chr1	4364836	4364986	2.35	7.68	9.45e-13	9.681e-12	ADULT-BIASED
chr1	4366731	4366881	1.92	4.9	2.085e-06	7.775e-06	ADULT-BIASED
chr1	4368231	4368381	1.57	4.27	3.123e-05	9.162e-05	ADULT-BIASED
chr1	4368675	4368825	2.53	7.6	1.479e-12	1.478e-11	ADULT-BIASED
chr1	4369003	4369153	2.5	7.22	1.407e-11	1.232e-10	ADULT-BIASED
chr1	4370397	4370547	2.61	10.15	1.89e-19	4.011e-18	ADULT-BIASED
chr1	4371644	4371794	1.64	3.69	0.000292	0.0006918	ADULT-BIASED
chr1	4372165	4372315	1.51	3.91	0.0001312	0.0003362	ADULT-BIASED
chr1	4374292	4374442	2.57	4.82	2.996e-06	1.083e-05	ADULT-BIASED
chr1	4376794	4376944	1.8	5.92	1.586e-08	8.699e-08	ADULT-BIASED
chr1	4377451	4377601	1.68	5.88	1.932e-08	1.044e-07	ADULT-BIASED
chr1	4378036	4378186	1.53	4.15	5.08e-05	0.0001424	ADULT-BIASED
chr1	4378977	4379127	2.69	6.53	6.361e-10	4.377e-09	ADULT-BIASED
chr1	4379406	4379556	2.03	4.75	4.125e-06	1.45e-05	ADULT-BIASED
chr1	4380051	4380201	1.62	6.23	3.117e-09	1.923e-08	ADULT-BIASED
chr1	4380681	4380831	2.39	7.87	3.032e-13	3.303e-12	ADULT-BIASED
chr1	4381695	4381845	1.8	2.99	0.003172	0.005911	ADULT-BIASED
chr1	4384217	4384367	2.8	7.68	9.566e-13	9.793e-12	ADULT-BIASED
chr1	4384633	4384783	1.76	8.31	2.11e-14	2.635e-13	ADULT-BIASED
chr1	4385425	4385575	2.25	5.57	8.906e-08	4.293e-07	ADULT-BIASED
chr1	4385797	4385947	2.06	4.53	1.084e-05	3.499e-05	ADULT-BIASED
chr1	4386741	4386891	1.97	6.56	5.41e-10	3.762e-09	ADULT-BIASED
chr1	4387669	4387819	2.23	6.1	6.398e-09	3.751e-08	ADULT-BIASED
chr1	4388653	4388803	1.98	4.95	1.684e-06	6.396e-06	ADULT-BIASED
chr1	4389591	4389741	2.41	4.63	6.927e-06	2.328e-05	ADULT-BIASED
chr1	4390134	4390284	0.76	2.75	0.006585	0.01138	ADULT-BIASED
chr1	4390779	4390929	1.49	6.06	7.731e-09	4.471e-08	ADULT-BIASED
chr1	4391837	4391987	1.49	3.22	0.001504	0.003024	ADULT-BIASED
chr1	4394163	4394313	2.64	8.84	7.958e-16	1.164e-14	ADULT-BIASED
chr1	4394747	4394897	1.77	3.39	0.0008439	0.0018	ADULT-BIASED
chr1	4395308	4395458	1.78	4.24	3.569e-05	0.0001034	ADULT-BIASED
chr1	4395975	4396125	1.88	4.16	4.873e-05	0.0001372	ADULT-BIASED
chr1	4397243	4397393	1.63	5.3	3.334e-07	1.449e-06	ADULT-BIASED
chr1	4397995	4398145	2.83	7.22	1.375e-11	1.206e-10	ADULT-BIASED
chr1	4398295	4398445	2.22	8.22	3.722e-14	4.515e-13	ADULT-BIASED
chr1	4399237	4399387	2.24	6.99	4.921e-11	3.991e-10	ADULT-BIASED
chr1	4399847	4399997	2.01	4.98	1.484e-06	5.696e-06	ADULT-BIASED
chr1	4400346	4400496	2.19	6.08	7.079e-09	4.12e-08	ADULT-BIASED
chr1	4402130	4402280	2.18	5.04	1.098e-06	4.325e-06	ADULT-BIASED
chr1	4403961	4404111	2.3	8.11	7.182e-14	8.425e-13	ADULT-BIASED
chr1	4404500	4404650	1.36	4.31	2.718e-05	8.075e-05	ADULT-BIASED
chr1	4406041	4406191	1.8	4.25	3.352e-05	9.767e-05	ADULT-BIASED
chr1	4406583	4406733	1.52	6.71	2.437e-10	1.785e-09	ADULT-BIASED
chr1	4409477	4409627	2.79	6.46	9.288e-10	6.232e-09	ADULT-BIASED
chr1	4411401	4411551	2.01	5.2	5.228e-07	2.192e-06	ADULT-BIASED
chr1	4413633	4413783	1.77	4.4	1.875e-05	5.761e-05	ADULT-BIASED
chr1	4415949	4416099	1.7	7.2	1.584e-11	1.378e-10	ADULT-BIASED
chr1	4417477	4417627	1.5	4.23	3.665e-05	0.0001059	ADULT-BIASED
chr1	4418551	4418701	1.85	4.15	5.06e-05	0.0001419	ADULT-BIASED
chr1	4419095	4419245	1.8	5.61	7.507e-08	3.668e-07	ADULT-BIASED
chr1	4419405	4419555	2.03	3.5	0.0005943	0.001313	ADULT-BIASED
chr1	4419725	4419875	1.16	2.67	0.008245	0.01392	ADULT-BIASED
chr1	4420539	4420689	2.19	9.08	1.839e-16	2.876e-15	ADULT-BIASED
chr1	4421351	4421501	2.66	8.66	2.547e-15	3.529e-14	ADULT-BIASED
chr1	4422350	4422500	2.04	6.63	3.775e-10	2.688e-09	ADULT-BIASED
chr1	4423159	4423309	1.93	4.28	3.008e-05	8.853e-05	ADULT-BIASED
chr1	4424199	4424349	2.3	4.39	1.887e-05	5.792e-05	ADULT-BIASED
chr1	4425377	4425527	2.65	7.63	1.256e-12	1.266e-11	ADULT-BIASED
chr1	4426001	4426151	2.5	7.6	1.491e-12	1.488e-11	ADULT-BIASED
chr1	4427207	4427357	1.96	6.39	1.369e-09	8.942e-09	ADULT-BIASED
chr1	4432090	4432240	1.39	3.78	0.0002135	0.0005217	ADULT-BIASED
chr1	4433183	4433333	2.9	6.48	8.26e-10	5.585e-09	ADULT-BIASED
chr1	4437297	4437447	2.62	5.28	3.628e-07	1.567e-06	ADULT-BIASED
chr1	4438137	4438287	1.07	2.77	0.006265	0.01088	ADULT-BIASED
chr1	4442233	4442383	2.02	4.67	5.893e-06	2.009e-05	ADULT-BIASED
chr1	4442999	4443149	2.08	5.07	9.769e-07	3.887e-06	ADULT-BIASED
chr1	4444913	4445063	2.41	5.26	4.077e-07	1.744e-06	ADULT-BIASED
chr1	4447935	4448085	2.78	5.64	6.419e-08	3.174e-07	ADULT-BIASED
chr1	4448712	4448862	3.74	7.5	2.684e-12	2.59e-11	ADULT-BIASED
chr1	4449149	4449299	2.27	6.45	9.807e-10	6.556e-09	ADULT-BIASED
chr1	4449611	4449761	1.87	4.64	6.778e-06	2.283e-05	ADULT-BIASED
chr1	4450100	4450250	2.18	5.01	1.279e-06	4.975e-06	ADULT-BIASED
chr1	4451351	4451501	1.9	5.99	1.108e-08	6.241e-08	ADULT-BIASED
chr1	4454789	4454939	1.84	5.19	5.649e-07	2.354e-06	ADULT-BIASED
chr1	4455609	4455759	1.91	4.11	5.922e-05	0.0001636	ADULT-BIASED
chr1	4456783	4456933	-1.73	-3.84	0.0001728	0.0004312	FETAL-BIASED
chr1	4458229	4458379	-1.73	-2.52	0.01269	0.02051	FETAL-BIASED
chr1	4459451	4459601	2.17	5.11	8.273e-07	3.338e-06	ADULT-BIASED
chr1	4460380	4460530	1.67	4.36	2.148e-05	6.519e-05	ADULT-BIASED
chr1	4460863	4461013	1.81	3.17	0.001794	0.003542	ADULT-BIASED
chr1	4461509	4461659	1.9	7.23	1.327e-11	1.166e-10	ADULT-BIASED
chr1	4465059	4465209	0.72	2.27	0.02423	0.03664	ADULT-BIASED
chr1	4465571	4465721	2.05	6.38	1.449e-09	9.431e-09	ADULT-BIASED
chr1	4466363	4466513	1.87	5.57	9.033e-08	4.35e-07	ADULT-BIASED
chr1	4466973	4467123	2.5	7.59	1.584e-12	1.576e-11	ADULT-BIASED
chr1	4467647	4467797	1.94	6.14	4.985e-09	2.976e-08	ADULT-BIASED
chr1	4468799	4468949	1.44	5.69	4.892e-08	2.469e-07	ADULT-BIASED
chr1	4475389	4475539	1.99	5.26	3.997e-07	1.713e-06	ADULT-BIASED
chr1	4477839	4477989	1.21	2.98	0.00324	0.006024	ADULT-BIASED
chr1	4482247	4482397	-3.54	-7.97	1.713e-13	1.922e-12	FETAL-BIASED
chr1	4484311	4484461	1.78	7.03	4.035e-11	3.314e-10	ADULT-BIASED
chr1	4484975	4485125	1.72	6.85	1.122e-10	8.638e-10	ADULT-BIASED
chr1	4486197	4486347	1.47	4.17	4.68e-05	0.0001323	ADULT-BIASED
chr1	4486684	4486834	0.96	3.01	0.002944	0.005528	ADULT-BIASED
chr1	4489255	4489405	2.34	7.65	1.113e-12	1.129e-11	ADULT-BIASED
chr1	4489609	4489759	1.88	4.44	1.568e-05	4.896e-05	ADULT-BIASED
chr1	4489964	4490114	3.07	5.49	1.309e-07	6.122e-07	ADULT-BIASED
chr1	4490771	4490921	1.22	4.05	7.625e-05	0.0002057	ADULT-BIASED
chr1	4492279	4492429	1.66	7.16	1.966e-11	1.687e-10	ADULT-BIASED
chr1	4492590	4492740	1.43	5.03	1.192e-06	4.661e-06	ADULT-BIASED
chr1	4493273	4493423	3.05	9.32	3.834e-17	6.447e-16	ADULT-BIASED
chr1	4495032	4495182	3.29	9.05	2.195e-16	3.404e-15	ADULT-BIASED
chr1	4496349	4496499	1.75	6.5	7.583e-10	5.158e-09	ADULT-BIASED
chr1	4498429	4498579	2.11	5.57	9.16e-08	4.406e-07	ADULT-BIASED
chr1	4499275	4499425	2.71	10.52	1.618e-20	3.806e-19	ADULT-BIASED
chr1	4500244	4500394	2.7	5.93	1.462e-08	8.069e-08	ADULT-BIASED
chr1	4500909	4501059	1.08	2.32	0.02128	0.0326	ADULT-BIASED
chr1	4502859	4503009	1.73	5.62	7.223e-08	3.539e-07	ADULT-BIASED
chr1	4504573	4504723	1.68	3.72	0.0002633	0.0006301	ADULT-BIASED
chr1	4506063	4506213	2.06	8.8	1.02e-15	1.476e-14	ADULT-BIASED
chr1	4508147	4508297	-1.98	-5.56	9.714e-08	4.65e-07	FETAL-BIASED
chr1	4509128	4509278	1.73	5.05	1.054e-06	4.165e-06	ADULT-BIASED
chr1	4509477	4509627	1.9	3.55	0.0004846	0.001092	ADULT-BIASED
chr1	4510887	4511037	2.27	6.19	3.842e-09	2.336e-08	ADULT-BIASED
chr1	4514492	4514642	1.87	4.81	3.115e-06	1.123e-05	ADULT-BIASED
chr1	4516240	4516390	1.72	2.97	0.003346	0.006201	ADULT-BIASED
chr1	4516921	4517071	1.59	2.58	0.01054	0.01736	ADULT-BIASED
chr1	4517421	4517571	3.15	8.21	4.003e-14	4.838e-13	ADULT-BIASED
chr1	4519731	4519881	2.26	6.42	1.174e-09	7.752e-09	ADULT-BIASED
chr1	4520188	4520338	2.23	5.53	1.11e-07	5.261e-07	ADULT-BIASED
chr1	4520944	4521094	1.84	4.76	4.017e-06	1.416e-05	ADULT-BIASED
chr1	4521879	4522029	1.8	4.51	1.164e-05	3.735e-05	ADULT-BIASED
chr1	4523559	4523709	2.3	5.09	8.943e-07	3.585e-06	ADULT-BIASED
chr1	4525646	4525796	2.73	4.54	1.019e-05	3.31e-05	ADULT-BIASED
chr1	4526091	4526241	2.77	9.9	9.537e-19	1.889e-17	ADULT-BIASED
chr1	4527033	4527183	2.19	8.52	5.872e-15	7.816e-14	ADULT-BIASED
chr1	4528347	4528497	1.09	3.82	0.0001858	0.0004601	ADULT-BIASED
chr1	4528945	4529095	1.26	3.67	0.0003209	0.0007534	ADULT-BIASED
chr1	4529286	4529436	1.88	8.67	2.417e-15	3.357e-14	ADULT-BIASED
chr1	4529707	4529857	0.85	2.51	0.01286	0.02074	ADULT-BIASED
chr1	4529985	4530135	1.25	4.38	1.965e-05	6.011e-05	ADULT-BIASED
chr1	4532502	4532652	1.79	4.16	4.853e-05	0.0001367	ADULT-BIASED
chr1	4535381	4535531	2.25	7.27	1.008e-11	8.997e-11	ADULT-BIASED
chr1	4539967	4540117	2.49	5.97	1.193e-08	6.685e-08	ADULT-BIASED
chr1	4540593	4540743	2.08	4.88	2.326e-06	8.597e-06	ADULT-BIASED
chr1	4542583	4542733	2.62	8.04	1.083e-13	1.245e-12	ADULT-BIASED
chr1	4543969	4544119	1.29	5.61	7.62e-08	3.719e-07	ADULT-BIASED
chr1	4545519	4545669	-3.21	-12.79	3.958e-27	1.756e-25	FETAL-BIASED
chr1	4546758	4546908	1.34	4.83	2.842e-06	1.033e-05	ADULT-BIASED
chr1	4548459	4548609	2.32	7.96	1.771e-13	1.983e-12	ADULT-BIASED
chr1	4549565	4549715	2.21	6.77	1.753e-10	1.312e-09	ADULT-BIASED
chr1	4551379	4551529	2.15	7.5	2.693e-12	2.598e-11	ADULT-BIASED
chr1	4552363	4552513	1.75	5.02	1.227e-06	4.789e-06	ADULT-BIASED
chr1	4552783	4552933	2.7	8.31	2.162e-14	2.696e-13	ADULT-BIASED
chr1	4553245	4553395	2.3	5.32	3.095e-07	1.353e-06	ADULT-BIASED
chr1	4553742	4553892	1.63	5.12	7.907e-07	3.203e-06	ADULT-BIASED
chr1	4554537	4554687	1.98	6.56	5.328e-10	3.709e-09	ADULT-BIASED
chr1	4555907	4556057	1.95	5.03	1.188e-06	4.649e-06	ADULT-BIASED
chr1	4557150	4557300	1.33	4.57	9.119e-06	2.991e-05	ADULT-BIASED
chr1	4557989	4558139	2.48	9.45	1.7e-17	2.967e-16	ADULT-BIASED
chr1	4559289	4559439	1.78	4.4	1.804e-05	5.562e-05	ADULT-BIASED
chr1	4560561	4560711	2.08	5.6	7.792e-08	3.796e-07	ADULT-BIASED
chr1	4561251	4561401	1.88	4.08	6.754e-05	0.0001843	ADULT-BIASED
chr1	4561589	4561739	1.68	4.14	5.231e-05	0.0001462	ADULT-BIASED
chr1	4562151	4562301	2.34	6.03	8.791e-09	5.039e-08	ADULT-BIASED
chr1	4563228	4563378	3.01	10.24	9.974e-20	2.175e-18	ADULT-BIASED
chr1	4564117	4564267	2.04	6.08	6.991e-09	4.072e-08	ADULT-BIASED
chr1	4564968	4565118	2.02	6.16	4.499e-09	2.704e-08	ADULT-BIASED
chr1	4565537	4565687	1.99	5.37	2.404e-07	1.073e-06	ADULT-BIASED
chr1	4566138	4566288	2.19	5.93	1.471e-08	8.116e-08	ADULT-BIASED
chr1	4567581	4567731	0.98	3.36	0.0009561	0.002014	ADULT-BIASED
chr1	4569699	4569849	1.78	5.01	1.276e-06	4.965e-06	ADULT-BIASED
chr1	4575369	4575519	1.26	3.89	0.0001391	0.0003544	ADULT-BIASED
chr1	4576105	4576255	0.81	4.62	7.223e-06	2.418e-05	ADULT-BIASED
chr1	4578763	4578913	2.41	4.64	6.586e-06	2.223e-05	ADULT-BIASED
chr1	4579950	4580100	2.64	7.12	2.463e-11	2.085e-10	ADULT-BIASED
chr1	4585555	4585705	1.45	5.74	3.969e-08	2.035e-07	ADULT-BIASED
chr1	4587918	4588068	-1.96	-7.32	7.729e-12	7.01e-11	FETAL-BIASED
chr1	4588798	4588948	1.61	4.95	1.692e-06	6.426e-06	ADULT-BIASED
chr1	4589699	4589849	1.08	3.21	0.001585	0.003171	ADULT-BIASED
chr1	4591193	4591343	1.81	5.68	5.328e-08	2.672e-07	ADULT-BIASED
chr1	4605833	4605983	2.5	6.32	1.994e-09	1.269e-08	ADULT-BIASED
chr1	4606473	4606623	2.47	7.3	8.833e-12	7.949e-11	ADULT-BIASED
chr1	4608147	4608297	2.33	5.99	1.074e-08	6.064e-08	ADULT-BIASED
chr1	4608655	4608805	1.99	6	1.026e-08	5.813e-08	ADULT-BIASED
chr1	4612597	4612747	1.81	5.63	6.743e-08	3.321e-07	ADULT-BIASED
chr1	4613867	4614017	2.12	5.63	6.825e-08	3.359e-07	ADULT-BIASED
chr1	4614471	4614621	1.51	4.42	1.726e-05	5.343e-05	ADULT-BIASED
chr1	4614697	4614847	1.64	3.93	0.0001197	0.0003094	ADULT-BIASED
chr1	4616091	4616241	2.57	5.75	3.786e-08	1.948e-07	ADULT-BIASED
chr1	4618133	4618283	1.77	3.43	0.0007378	0.001595	ADULT-BIASED
chr1	4618509	4618659	2.27	7.08	3.061e-11	2.557e-10	ADULT-BIASED
chr1	4619247	4619397	2.44	5.23	4.623e-07	1.958e-06	ADULT-BIASED
chr1	4620936	4621086	1.14	3.52	0.000545	0.001215	ADULT-BIASED
chr1	4622029	4622179	3.02	6.15	4.856e-09	2.904e-08	ADULT-BIASED
chr1	4622433	4622583	2.78	6.67	2.937e-10	2.126e-09	ADULT-BIASED
chr1	4622827	4622977	2.35	5.04	1.117e-06	4.395e-06	ADULT-BIASED
chr1	4625729	4625879	1.7	4.22	3.805e-05	0.0001096	ADULT-BIASED
chr1	4627459	4627609	2.64	5.48	1.409e-07	6.553e-07	ADULT-BIASED
chr1	4628777	4628927	1.88	6.13	5.198e-09	3.094e-08	ADULT-BIASED
chr1	4630449	4630599	2.12	4.89	2.193e-06	8.144e-06	ADULT-BIASED
chr1	4631387	4631537	-1.72	-6.01	1.016e-08	5.762e-08	FETAL-BIASED
chr1	4632137	4632287	1.78	3.94	0.0001147	0.0002976	ADULT-BIASED
chr1	4633773	4633923	1.29	3.71	0.0002793	0.0006646	ADULT-BIASED
chr1	4635610	4635760	1.53	5.27	3.77e-07	1.623e-06	ADULT-BIASED
chr1	4642271	4642421	0.91	2.39	0.01808	0.02816	ADULT-BIASED
chr1	4644553	4644703	-0.84	-4.16	4.878e-05	0.0001373	FETAL-BIASED
chr1	4644969	4645119	-1.36	-4.51	1.171e-05	3.755e-05	FETAL-BIASED
chr1	4645389	4645539	-1.07	-5.66	5.836e-08	2.907e-07	FETAL-BIASED
chr1	4646777	4646927	1.95	5.67	5.543e-08	2.772e-07	ADULT-BIASED
chr1	4647379	4647529	1.23	5.17	6.035e-07	2.501e-06	ADULT-BIASED
chr1	4651603	4651753	1.1	2.42	0.0167	0.02622	ADULT-BIASED
chr1	4652133	4652283	1.94	4.35	2.262e-05	6.833e-05	ADULT-BIASED
chr1	4653705	4653855	1.44	5.22	4.955e-07	2.087e-06	ADULT-BIASED
chr1	4655161	4655311	1.85	5.83	2.496e-08	1.324e-07	ADULT-BIASED
chr1	4656131	4656281	2.37	7.71	8.122e-13	8.392e-12	ADULT-BIASED
chr1	4657072	4657222	1.21	4.14	5.308e-05	0.0001482	ADULT-BIASED
chr1	4658869	4659019	2.61	7.03	3.959e-11	3.255e-10	ADULT-BIASED
chr1	4660491	4660641	1.17	3.5	0.0005774	0.001279	ADULT-BIASED
chr1	4662130	4662280	1.44	3.17	0.001804	0.00356	ADULT-BIASED
chr1	4662693	4662843	1.71	5.93	1.497e-08	8.25e-08	ADULT-BIASED
chr1	4663653	4663803	-0.7	-2.6	0.01006	0.01665	FETAL-BIASED
chr1	4664296	4664446	1.36	3.78	0.0002126	0.0005198	ADULT-BIASED
chr1	4664528	4664678	1.28	3.23	0.001452	0.00293	ADULT-BIASED
chr1	4665469	4665619	-1.9	-3.76	0.000231	0.0005602	FETAL-BIASED
chr1	4666097	4666247	1.61	7.36	6.001e-12	5.524e-11	ADULT-BIASED
chr1	4666483	4666633	2.16	6.93	7.271e-11	5.754e-10	ADULT-BIASED
chr1	4667702	4667852	1.9	5.27	3.846e-07	1.653e-06	ADULT-BIASED
chr1	4668099	4668249	1.25	4.4	1.872e-05	5.753e-05	ADULT-BIASED
chr1	4669005	4669155	2.56	5.64	6.352e-08	3.144e-07	ADULT-BIASED
chr1	4671310	4671460	1.19	6.51	7.086e-10	4.841e-09	ADULT-BIASED
chr1	4671725	4671875	-1.11	-5.53	1.106e-07	5.242e-07	FETAL-BIASED
chr1	4672249	4672399	1.02	2.46	0.0148	0.02354	ADULT-BIASED
chr1	4672623	4672773	2.12	6.88	9.592e-11	7.463e-10	ADULT-BIASED
chr1	4673181	4673331	-1.03	-6.4	1.284e-09	8.423e-09	FETAL-BIASED
chr1	4675693	4675843	2.36	4.7	5.163e-06	1.78e-05	ADULT-BIASED
chr1	4681253	4681403	2.15	3.66	0.0003295	0.0007716	ADULT-BIASED
chr1	4684743	4684893	2.2	6.12	5.495e-09	3.257e-08	ADULT-BIASED
chr1	4687715	4687865	1.6	6.18	4.074e-09	2.466e-08	ADULT-BIASED
chr1	4688914	4689064	2.43	6.34	1.75e-09	1.124e-08	ADULT-BIASED
chr1	4690013	4690163	2.6	6.41	1.221e-09	8.038e-09	ADULT-BIASED
chr1	4691239	4691389	2.72	8.12	6.786e-14	7.984e-13	ADULT-BIASED
chr1	4692433	4692583	1.08	2.35	0.01983	0.0306	ADULT-BIASED
chr1	4694023	4694173	2.4	8.23	3.446e-14	4.197e-13	ADULT-BIASED
chr1	4694849	4694999	0.94	2.18	0.03067	0.04526	ADULT-BIASED
chr1	4695127	4695277	1.7	5.2	5.32e-07	2.228e-06	ADULT-BIASED
chr1	4696705	4696855	1.64	6.36	1.624e-09	1.049e-08	ADULT-BIASED
chr1	4698191	4698341	-1.32	-10.69	5.14e-21	1.268e-19	FETAL-BIASED
chr1	4698865	4699015	1.05	3.05	0.00262	0.004979	ADULT-BIASED
chr1	4700909	4701059	-1.05	-5.6	7.899e-08	3.844e-07	FETAL-BIASED
chr1	4701130	4701280	-4.12	-3.98	9.762e-05	0.0002573	FETAL-BIASED
chr1	4702357	4702507	2.08	6.66	3.118e-10	2.248e-09	ADULT-BIASED
chr1	4702905	4703055	2.44	7.35	6.51e-12	5.963e-11	ADULT-BIASED
chr1	4704420	4704570	3.08	5.4	2.094e-07	9.444e-07	ADULT-BIASED
chr1	4706361	4706511	1.76	5.09	8.761e-07	3.518e-06	ADULT-BIASED
chr1	4708453	4708603	1.71	5.23	4.61e-07	1.953e-06	ADULT-BIASED
chr1	4708835	4708985	2.13	7.78	5.179e-13	5.481e-12	ADULT-BIASED
chr1	4710053	4710203	2.54	5.2	5.427e-07	2.269e-06	ADULT-BIASED
chr1	4710234	4710384	2.64	8.71	1.893e-15	2.66e-14	ADULT-BIASED
chr1	4712049	4712199	1.18	3.9	0.0001376	0.0003509	ADULT-BIASED
chr1	4712607	4712757	-0.62	-3.03	0.002818	0.005315	FETAL-BIASED
chr1	4713594	4713744	0.56	2.2	0.02873	0.04267	ADULT-BIASED
chr1	4715938	4716088	-1.52	-4.84	2.729e-06	9.947e-06	FETAL-BIASED
chr1	4718476	4718626	-2.55	-5.77	3.36e-08	1.744e-07	FETAL-BIASED
chr1	4718699	4718849	-1.09	-3.98	9.802e-05	0.0002582	FETAL-BIASED
chr1	4720135	4720285	1.61	3.71	0.0002721	0.0006491	ADULT-BIASED
chr1	4722571	4722721	1.74	5.2	5.272e-07	2.21e-06	ADULT-BIASED
chr1	4723265	4723415	1.76	3.7	0.0002907	0.0006889	ADULT-BIASED
chr1	4723917	4724067	2.1	7.04	3.9e-11	3.209e-10	ADULT-BIASED
chr1	4724435	4724585	1.45	2.69	0.00785	0.01333	ADULT-BIASED
chr1	4725667	4725817	1.85	4.6	8.012e-06	2.658e-05	ADULT-BIASED
chr1	4725942	4726092	2	5.92	1.549e-08	8.512e-08	ADULT-BIASED
chr1	4727011	4727161	2.78	4.97	1.537e-06	5.883e-06	ADULT-BIASED
chr1	4727781	4727931	1.98	4.46	1.461e-05	4.59e-05	ADULT-BIASED
chr1	4728715	4728865	2.39	9.81	1.67e-18	3.228e-17	ADULT-BIASED
chr1	4730204	4730354	1.86	6.73	2.122e-10	1.568e-09	ADULT-BIASED
chr1	4730603	4730753	1.23	5.44	1.695e-07	7.771e-07	ADULT-BIASED
chr1	4732049	4732199	1.86	5.8	2.941e-08	1.542e-07	ADULT-BIASED
chr1	4732747	4732897	1.8	5.41	1.984e-07	8.987e-07	ADULT-BIASED
chr1	4733652	4733802	1.69	4.33	2.496e-05	7.471e-05	ADULT-BIASED
chr1	4734251	4734401	0.97	2.32	0.02146	0.03285	ADULT-BIASED
chr1	4735497	4735647	1.01	3.77	0.0002175	0.0005306	ADULT-BIASED
chr1	4735978	4736128	2.06	5.28	3.667e-07	1.582e-06	ADULT-BIASED
chr1	4738011	4738161	1.22	2.18	0.03068	0.04527	ADULT-BIASED
chr1	4738513	4738663	1.75	7.28	9.681e-12	8.665e-11	ADULT-BIASED
chr1	4739870	4740020	2.1	5.62	7.215e-08	3.536e-07	ADULT-BIASED
chr1	4741455	4741605	1.72	3.87	0.0001509	0.0003814	ADULT-BIASED
chr1	4742476	4742626	1.87	7.27	1.039e-11	9.26e-11	ADULT-BIASED
chr1	4743369	4743519	2.7	7.04	3.796e-11	3.129e-10	ADULT-BIASED
chr1	4744413	4744563	0.7	3.4	0.000816	0.001746	ADULT-BIASED
chr1	4745852	4746002	2.02	5.36	2.512e-07	1.117e-06	ADULT-BIASED
chr1	4747505	4747655	1.67	5.16	6.54e-07	2.692e-06	ADULT-BIASED
chr1	4748549	4748699	2.38	4.18	4.483e-05	0.0001272	ADULT-BIASED
chr1	4749053	4749203	1.88	6.73	2.11e-10	1.56e-09	ADULT-BIASED
chr1	4751122	4751272	1.23	4.6	7.911e-06	2.627e-05	ADULT-BIASED
chr1	4754377	4754527	1.77	5.53	1.093e-07	5.186e-07	ADULT-BIASED
chr1	4755935	4756085	1.73	7.73	7.011e-13	7.298e-12	ADULT-BIASED
chr1	4756557	4756707	1.57	5.31	3.239e-07	1.411e-06	ADULT-BIASED
chr1	4758427	4758577	1.45	3.93	0.0001225	0.0003159	ADULT-BIASED
chr1	4761089	4761239	-2.23	-7.43	4.068e-12	3.831e-11	FETAL-BIASED
chr1	4761921	4762071	1.75	6.36	1.587e-09	1.026e-08	ADULT-BIASED
chr1	4763090	4763240	-0.81	-5.16	6.293e-07	2.599e-06	FETAL-BIASED
chr1	4765579	4765729	1.63	5.92	1.592e-08	8.732e-08	ADULT-BIASED
chr1	4765852	4766002	0.9	2.46	0.01489	0.02366	ADULT-BIASED
chr1	4766387	4766537	2.09	4.22	3.805e-05	0.0001096	ADULT-BIASED
chr1	4767089	4767239	1.47	6.85	1.109e-10	8.547e-10	ADULT-BIASED
chr1	4767673	4767823	0.82	4.71	4.96e-06	1.716e-05	ADULT-BIASED
chr1	4768547	4768697	1.71	6	1.044e-08	5.907e-08	ADULT-BIASED
chr1	4768963	4769113	-3.07	-3.69	0.0002943	0.0006967	FETAL-BIASED
chr1	4769376	4769526	1.79	3.55	0.0004981	0.00112	ADULT-BIASED
chr1	4771107	4771257	-0.66	-2.28	0.02369	0.0359	FETAL-BIASED
chr1	4772268	4772418	3.17	8.81	9.587e-16	1.391e-14	ADULT-BIASED
chr1	4773931	4774081	2.62	7.11	2.53e-11	2.138e-10	ADULT-BIASED
chr1	4774787	4774937	1.33	2.89	0.004289	0.007748	ADULT-BIASED
chr1	4775244	4775394	1.63	2.77	0.006181	0.01075	ADULT-BIASED
chr1	4777375	4777525	2.46	8.78	1.194e-15	1.714e-14	ADULT-BIASED
chr1	4777677	4777827	2.18	6.86	1.021e-10	7.913e-10	ADULT-BIASED
chr1	4778191	4778341	2.37	7.27	1.034e-11	9.219e-11	ADULT-BIASED
chr1	4779879	4780029	1.95	7.64	1.205e-12	1.217e-11	ADULT-BIASED
chr1	4780991	4781141	2.34	6.29	2.272e-09	1.433e-08	ADULT-BIASED
chr1	4782833	4782983	2.86	7.59	1.586e-12	1.577e-11	ADULT-BIASED
chr1	4786853	4787003	-0.59	-3.56	0.0004686	0.00106	FETAL-BIASED
chr1	4790603	4790753	2.39	8.55	5.098e-15	6.831e-14	ADULT-BIASED
chr1	4792016	4792166	1.93	6.34	1.741e-09	1.119e-08	ADULT-BIASED
chr1	4794055	4794205	-1.86	-3.66	0.0003335	0.00078	FETAL-BIASED
chr1	4795194	4795344	1.24	3.54	0.0005167	0.001157	ADULT-BIASED
chr1	4796358	4796508	0.69	2.76	0.006459	0.01119	ADULT-BIASED
chr1	4797167	4797317	2	6.7	2.538e-10	1.854e-09	ADULT-BIASED
chr1	4798201	4798351	2.07	8.15	5.571e-14	6.622e-13	ADULT-BIASED
chr1	4798885	4799035	2.47	5.41	1.944e-07	8.821e-07	ADULT-BIASED
chr1	4801180	4801330	1.71	7.11	2.545e-11	2.149e-10	ADULT-BIASED
chr1	4801707	4801857	2.65	4.54	1.009e-05	3.279e-05	ADULT-BIASED
chr1	4802215	4802365	0.82	4.42	1.669e-05	5.183e-05	ADULT-BIASED
chr1	4802513	4802663	1.43	6.38	1.404e-09	9.159e-09	ADULT-BIASED
chr1	4803259	4803409	1.85	6.91	7.749e-11	6.108e-10	ADULT-BIASED
chr1	4804715	4804865	1.87	5.56	9.315e-08	4.474e-07	ADULT-BIASED
chr1	4805887	4806037	0.59	3.18	0.001722	0.003415	ADULT-BIASED
chr1	4807273	4807423	2.09	5.8	2.932e-08	1.538e-07	ADULT-BIASED
chr1	4808264	4808414	1.82	4.66	6.16e-06	2.092e-05	ADULT-BIASED
chr1	4809445	4809595	1.6	5.54	1.07e-07	5.083e-07	ADULT-BIASED
chr1	4811103	4811253	2.52	9.19	9.286e-17	1.499e-15	ADULT-BIASED
chr1	4812411	4812561	1.71	6.38	1.406e-09	9.171e-09	ADULT-BIASED
chr1	4812953	4813103	2.01	5.8	2.946e-08	1.545e-07	ADULT-BIASED
chr1	4814912	4815062	2.11	6.98	5.294e-11	4.274e-10	ADULT-BIASED
chr1	4815419	4815569	-1.96	-4.16	4.813e-05	0.0001357	FETAL-BIASED
chr1	4815599	4815749	-3.1	-5.7	4.679e-08	2.369e-07	FETAL-BIASED
chr1	4817255	4817405	2.19	6.93	6.959e-11	5.522e-10	ADULT-BIASED
chr1	4818957	4819107	2.24	4.95	1.677e-06	6.372e-06	ADULT-BIASED
chr1	4819727	4819877	1.41	4.48	1.335e-05	4.231e-05	ADULT-BIASED
chr1	4820777	4820927	2.42	4.82	2.962e-06	1.072e-05	ADULT-BIASED
chr1	4821479	4821629	1.69	5.52	1.143e-07	5.403e-07	ADULT-BIASED
chr1	4821665	4821815	1.92	3.85	0.0001636	0.0004105	ADULT-BIASED
chr1	4822869	4823019	1.8	3.98	9.873e-05	0.0002599	ADULT-BIASED
chr1	4823961	4824111	1.82	8.01	1.358e-13	1.542e-12	ADULT-BIASED
chr1	4824385	4824535	2.26	8.89	5.818e-16	8.633e-15	ADULT-BIASED
chr1	4828135	4828285	1.71	5.5	1.257e-07	5.898e-07	ADULT-BIASED
chr1	4830229	4830379	1.99	5.66	5.758e-08	2.871e-07	ADULT-BIASED
chr1	4833324	4833474	1.37	6.02	9.292e-09	5.305e-08	ADULT-BIASED
chr1	4833817	4833967	2.34	7.4	4.873e-12	4.54e-11	ADULT-BIASED
chr1	4834496	4834646	2.17	6.14	5.088e-09	3.033e-08	ADULT-BIASED
chr1	4836115	4836265	1.64	4.81	3.176e-06	1.143e-05	ADULT-BIASED
chr1	4836839	4836989	1.7	4.44	1.552e-05	4.851e-05	ADULT-BIASED
chr1	4838047	4838197	-0.57	-3.59	0.0004219	0.0009639	FETAL-BIASED
chr1	4840264	4840414	1.62	3.49	0.0006047	0.001334	ADULT-BIASED
chr1	4841701	4841851	2.15	6.74	2.067e-10	1.53e-09	ADULT-BIASED
chr1	4843285	4843435	1.25	3.66	0.0003275	0.0007674	ADULT-BIASED
chr1	4844119	4844269	2.75	8.76	1.343e-15	1.917e-14	ADULT-BIASED
chr1	4845205	4845355	1.75	6.3	2.158e-09	1.366e-08	ADULT-BIASED
chr1	4846054	4846204	0.61	2.59	0.01045	0.01723	ADULT-BIASED
chr1	4846723	4846873	1.91	5.39	2.211e-07	9.93e-07	ADULT-BIASED
chr1	4848758	4848908	2.05	4.19	4.321e-05	0.000123	ADULT-BIASED
chr1	4850093	4850243	2.1	8.2	4.231e-14	5.1e-13	ADULT-BIASED
chr1	4853309	4853459	1.79	7.02	4.286e-11	3.506e-10	ADULT-BIASED
chr1	4854537	4854687	-0.54	-3.28	0.001225	0.002515	FETAL-BIASED
chr1	4855651	4855801	1.34	4.27	3.201e-05	9.37e-05	ADULT-BIASED
chr1	4857317	4857467	1.01	3.65	0.0003483	0.000811	ADULT-BIASED
chr1	4858405	4858555	2.02	6.62	3.997e-10	2.835e-09	ADULT-BIASED
chr1	4859521	4859671	2.17	5.81	2.766e-08	1.457e-07	ADULT-BIASED
chr1	4859815	4859965	1.5	4.75	4.138e-06	1.455e-05	ADULT-BIASED
chr1	4860547	4860697	1.58	4.61	7.573e-06	2.525e-05	ADULT-BIASED
chr1	4861789	4861939	-2.3	-3.58	0.0004418	0.001005	FETAL-BIASED
chr1	4877325	4877475	1.37	3.02	0.002924	0.005493	ADULT-BIASED
chr1	4882615	4882765	1.95	3.66	0.0003329	0.0007788	ADULT-BIASED
chr1	4885187	4885337	0.94	2.52	0.01263	0.02042	ADULT-BIASED
chr1	4886227	4886377	-2.29	-11.13	2.816e-22	7.823e-21	FETAL-BIASED
chr1	4887852	4888002	1.99	5.53	1.075e-07	5.108e-07	ADULT-BIASED
chr1	4888534	4888684	2.63	5.74	3.976e-08	2.038e-07	ADULT-BIASED
chr1	4888765	4888915	1.38	2.99	0.003184	0.00593	ADULT-BIASED
chr1	4889345	4889495	1.58	3.36	0.0009523	0.002007	ADULT-BIASED
chr1	4889615	4889765	1.5	3.33	0.001055	0.002199	ADULT-BIASED
chr1	4890085	4890235	1.38	5.9	1.753e-08	9.546e-08	ADULT-BIASED
chr1	4891755	4891905	1.4	3.9	0.0001337	0.000342	ADULT-BIASED
chr1	4892175	4892325	2.11	7.89	2.679e-13	2.936e-12	ADULT-BIASED
chr1	4893347	4893497	2.16	6.59	4.717e-10	3.31e-09	ADULT-BIASED
chr1	4894523	4894673	2.16	4.11	6.039e-05	0.0001665	ADULT-BIASED
chr1	4898091	4898241	1.68	3.54	0.0005126	0.001149	ADULT-BIASED
chr1	4899460	4899610	1.9	4.85	2.685e-06	9.801e-06	ADULT-BIASED
chr1	4899917	4900067	1.23	2.26	0.02473	0.03732	ADULT-BIASED
chr1	4905601	4905751	1.72	4.36	2.179e-05	6.606e-05	ADULT-BIASED
chr1	4911735	4911885	1.03	2.46	0.01495	0.02374	ADULT-BIASED
chr1	4913251	4913401	1.75	3.36	0.0009661	0.002033	ADULT-BIASED
chr1	4916460	4916610	1.27	2.79	0.005782	0.01013	ADULT-BIASED
chr1	4918707	4918857	1.47	2.49	0.0135	0.02167	ADULT-BIASED
chr1	4928180	4928330	1.18	2.85	0.004834	0.008627	ADULT-BIASED
chr1	4929291	4929441	1.65	2.89	0.004263	0.007706	ADULT-BIASED
chr1	4929776	4929926	2.87	5.46	1.556e-07	7.181e-07	ADULT-BIASED
chr1	4930630	4930780	2.69	7.08	3.13e-11	2.611e-10	ADULT-BIASED
chr1	4931394	4931544	2.28	8.76	1.342e-15	1.916e-14	ADULT-BIASED
chr1	4931870	4932020	2.52	10.87	1.65e-21	4.267e-20	ADULT-BIASED
chr1	4932427	4932577	2.11	4.96	1.619e-06	6.172e-06	ADULT-BIASED
chr1	4933657	4933807	1.81	4.42	1.718e-05	5.32e-05	ADULT-BIASED
chr1	4936833	4936983	1.84	5.3	3.332e-07	1.448e-06	ADULT-BIASED
chr1	4938289	4938439	1.83	6.87	9.98e-11	7.744e-10	ADULT-BIASED
chr1	4939021	4939171	1.63	5.33	2.869e-07	1.262e-06	ADULT-BIASED
chr1	4939311	4939461	1.77	6.46	9.496e-10	6.362e-09	ADULT-BIASED
chr1	4939705	4939855	1.66	4.01	8.968e-05	0.0002383	ADULT-BIASED
chr1	4943015	4943165	1.84	3.63	0.0003717	0.0008599	ADULT-BIASED
chr1	4953043	4953193	2.17	3.89	0.0001389	0.0003539	ADULT-BIASED
chr1	4955758	4955908	1.58	3.99	9.674e-05	0.0002551	ADULT-BIASED
chr1	4957322	4957472	2.29	7.37	5.739e-12	5.297e-11	ADULT-BIASED
chr1	4958169	4958319	1.56	3.9	0.0001349	0.0003447	ADULT-BIASED
chr1	4959161	4959311	1.57	4.5	1.218e-05	3.893e-05	ADULT-BIASED
chr1	4959903	4960053	2.95	9.03	2.549e-16	3.926e-15	ADULT-BIASED
chr1	4960417	4960567	2.03	4.96	1.577e-06	6.025e-06	ADULT-BIASED
chr1	4962103	4962253	1.54	2.58	0.01053	0.01735	ADULT-BIASED
chr1	4963415	4963565	2.09	5.18	5.758e-07	2.396e-06	ADULT-BIASED
chr1	4965304	4965454	2.73	5.21	5.124e-07	2.152e-06	ADULT-BIASED
chr1	4967953	4968103	1.93	4.49	1.255e-05	3.999e-05	ADULT-BIASED
chr1	4968689	4968839	2.03	5.03	1.161e-06	4.552e-06	ADULT-BIASED
chr1	4969179	4969329	2.14	3.31	0.00111	0.002303	ADULT-BIASED
chr1	4969593	4969743	1.55	3.03	0.002772	0.005236	ADULT-BIASED
chr1	4969999	4970149	1.79	3.47	0.0006562	0.001435	ADULT-BIASED
chr1	4970897	4971047	1.39	2.7	0.007586	0.01292	ADULT-BIASED
chr1	4971635	4971785	1.68	3.52	0.0005529	0.00123	ADULT-BIASED
chr1	4972630	4972780	2.25	8.71	1.888e-15	2.654e-14	ADULT-BIASED
chr1	4973571	4973721	2.29	7.15	1.999e-11	1.714e-10	ADULT-BIASED
chr1	4977259	4977409	1.84	4	9.089e-05	0.0002412	ADULT-BIASED
chr1	4978871	4979021	2.96	4.59	8.274e-06	2.737e-05	ADULT-BIASED
chr1	4980585	4980735	2.12	5.15	6.737e-07	2.766e-06	ADULT-BIASED
chr1	4980927	4981077	1.96	4.17	4.768e-05	0.0001345	ADULT-BIASED
chr1	4981391	4981541	1.85	4.2	4.184e-05	0.0001194	ADULT-BIASED
chr1	4983641	4983791	1.99	5.84	2.312e-08	1.233e-07	ADULT-BIASED
chr1	4984755	4984905	1.48	5.05	1.057e-06	4.175e-06	ADULT-BIASED
chr1	4985797	4985947	2.82	7.64	1.206e-12	1.218e-11	ADULT-BIASED
chr1	4988029	4988179	2.32	5.02	1.254e-06	4.886e-06	ADULT-BIASED
chr1	4988502	4988652	1.67	4.49	1.26e-05	4.014e-05	ADULT-BIASED
chr1	4989447	4989597	1.38	4.27	3.182e-05	9.318e-05	ADULT-BIASED
chr1	4990005	4990155	1.68	6.06	7.811e-09	4.514e-08	ADULT-BIASED
chr1	4990925	4991075	1.61	5.92	1.613e-08	8.841e-08	ADULT-BIASED
chr1	4991575	4991725	1.14	4.74	4.287e-06	1.502e-05	ADULT-BIASED
chr1	4994537	4994687	1.65	6.26	2.649e-09	1.653e-08	ADULT-BIASED
chr1	4995752	4995902	1.33	4.89	2.231e-06	8.273e-06	ADULT-BIASED
chr1	4996011	4996161	-0.81	-3.51	0.0005711	0.001267	FETAL-BIASED
chr1	4996955	4997105	0.93	2.91	0.004128	0.007487	ADULT-BIASED
chr1	4998127	4998277	1.77	3.91	0.00013	0.0003332	ADULT-BIASED
chr1	4999003	4999153	2.07	4.74	4.382e-06	1.533e-05	ADULT-BIASED
chr1	5000693	5000843	1.92	4.05	7.606e-05	0.0002053	ADULT-BIASED
chr1	5001764	5001914	1.72	4.16	4.99e-05	0.0001402	ADULT-BIASED
chr1	5002133	5002283	1.87	7.29	9.313e-12	8.355e-11	ADULT-BIASED
chr1	5002769	5002919	-2.37	-3.36	0.0009396	0.001982	FETAL-BIASED
chr1	5012036	5012186	1.28	2.61	0.009881	0.01638	ADULT-BIASED
chr1	5015721	5015871	2.72	6.56	5.316e-10	3.701e-09	ADULT-BIASED
chr1	5017039	5017189	1.63	5.03	1.162e-06	4.554e-06	ADULT-BIASED
chr1	5018139	5018289	2.11	7.36	6.312e-12	5.792e-11	ADULT-BIASED
chr1	5019073	5019223	2.64	8.37	1.457e-14	1.853e-13	ADULT-BIASED
chr1	5019399	5019549	2.66	9.01	2.806e-16	4.304e-15	ADULT-BIASED
chr1	5019745	5019895	1.84	5.97	1.224e-08	6.845e-08	ADULT-BIASED
chr1	5020124	5020274	1.91	7.73	7.263e-13	7.546e-12	ADULT-BIASED
chr1	5020854	5021004	1.99	7.25	1.159e-11	1.026e-10	ADULT-BIASED
chr1	5021717	5021867	2.43	8.68	2.223e-15	3.1e-14	ADULT-BIASED
chr1	5022117	5022267	-1.9	-7	4.767e-11	3.874e-10	FETAL-BIASED
chr1	5022454	5022604	2.62	8.86	7.42e-16	1.089e-14	ADULT-BIASED
chr1	5023403	5023553	-2.11	-6.02	9.333e-09	5.327e-08	FETAL-BIASED
chr1	5024954	5025104	2.01	8.13	6.451e-14	7.609e-13	ADULT-BIASED
chr1	5025483	5025633	2.63	9.78	2.037e-18	3.903e-17	ADULT-BIASED
chr1	5026526	5026676	2.31	7.8	4.607e-13	4.906e-12	ADULT-BIASED
chr1	5026891	5027041	2.71	6.82	1.329e-10	1.012e-09	ADULT-BIASED
chr1	5027215	5027365	2.23	5.12	7.783e-07	3.157e-06	ADULT-BIASED
chr1	5027663	5027813	2.73	5.91	1.633e-08	8.94e-08	ADULT-BIASED
chr1	5029916	5030066	1.96	8.61	3.485e-15	4.759e-14	ADULT-BIASED
chr1	5030418	5030568	2.53	5.8	2.95e-08	1.547e-07	ADULT-BIASED
chr1	5031963	5032113	2.23	7.83	4e-13	4.291e-12	ADULT-BIASED
chr1	5032480	5032630	2.47	7.72	7.339e-13	7.621e-12	ADULT-BIASED
chr1	5033290	5033440	2.79	5.42	1.897e-07	8.623e-07	ADULT-BIASED
chr1	5034512	5034662	3.02	6.6	4.298e-10	3.034e-09	ADULT-BIASED
chr1	5035667	5035817	1.09	4.1	6.243e-05	0.0001716	ADULT-BIASED
chr1	5038240	5038390	1.02	4.54	1.043e-05	3.381e-05	ADULT-BIASED
chr1	5040086	5040236	1.95	5.86	2.09e-08	1.123e-07	ADULT-BIASED
chr1	5040471	5040621	2.72	8.65	2.73e-15	3.77e-14	ADULT-BIASED
chr1	5041340	5041490	1.98	5.93	1.471e-08	8.116e-08	ADULT-BIASED
chr1	5044563	5044713	2.18	6.79	1.56e-10	1.176e-09	ADULT-BIASED
chr1	5044979	5045129	2.14	5.54	1.031e-07	4.915e-07	ADULT-BIASED
chr1	5045546	5045696	1.44	5.58	8.534e-08	4.128e-07	ADULT-BIASED
chr1	5046224	5046374	1.35	4.38	1.972e-05	6.031e-05	ADULT-BIASED
chr1	5048158	5048308	2.07	6.63	3.678e-10	2.624e-09	ADULT-BIASED
chr1	5048697	5048847	1.9	5.74	3.842e-08	1.974e-07	ADULT-BIASED
chr1	5049975	5050125	1.75	5.75	3.769e-08	1.939e-07	ADULT-BIASED
chr1	5051815	5051965	1.72	6.34	1.754e-09	1.127e-08	ADULT-BIASED
chr1	5058718	5058868	1.26	5.14	6.93e-07	2.839e-06	ADULT-BIASED
chr1	5060467	5060617	1.88	3.88	0.0001472	0.000373	ADULT-BIASED
chr1	5064861	5065011	2	5.05	1.071e-06	4.228e-06	ADULT-BIASED
chr1	5065917	5066067	1.6	4.62	7.198e-06	2.41e-05	ADULT-BIASED
chr1	5066745	5066895	2.21	5.29	3.537e-07	1.53e-06	ADULT-BIASED
chr1	5069577	5069727	1.09	3.92	0.000127	0.0003265	ADULT-BIASED
chr1	5070447	5070597	1.27	5.2	5.28e-07	2.213e-06	ADULT-BIASED
chr1	5070941	5071091	0.83	2.81	0.005523	0.00972	ADULT-BIASED
chr1	5071605	5071755	1.78	5.1	8.651e-07	3.477e-06	ADULT-BIASED
chr1	5072091	5072241	1.19	3.39	0.0008581	0.001827	ADULT-BIASED
chr1	5073913	5074063	2.34	7.12	2.495e-11	2.11e-10	ADULT-BIASED
chr1	5080979	5081129	1.68	7.11	2.568e-11	2.168e-10	ADULT-BIASED
chr1	5092241	5092391	2.13	3.72	0.0002702	0.000645	ADULT-BIASED
chr1	5094784	5094934	2.03	4.33	2.494e-05	7.468e-05	ADULT-BIASED
chr1	5098349	5098499	2.6	5.7	4.651e-08	2.356e-07	ADULT-BIASED
chr1	5105237	5105387	2.75	5.03	1.153e-06	4.521e-06	ADULT-BIASED
chr1	5137195	5137345	2.21	6.06	7.566e-09	4.382e-08	ADULT-BIASED
chr1	5138961	5139111	2.49	6.45	9.798e-10	6.55e-09	ADULT-BIASED
chr1	5142647	5142797	1.84	6.56	5.286e-10	3.682e-09	ADULT-BIASED
chr1	5144975	5145125	-1.99	-3.35	0.0009677	0.002036	FETAL-BIASED
chr1	5147023	5147173	1.92	3.62	0.0003818	0.0008812	ADULT-BIASED
[truncated: 63,536 more rows]

## Sheet: Aging_Regions
chr	start	˙	logFC	t	P.Value	adj.P.Val	DIR
chr1	10280	10430	5.71	4.04	0.0004323	0.003908	OLD-BIASED
chr1	566624	566774	3.6	2.7	0.01201	0.04178	OLD-BIASED
chr1	805229	805379	-0.92	-3.28	0.002991	0.01533	YOUNG-BIASED
chr1	840855	841005	-1.25	-3.75	0.0009059	0.00655	YOUNG-BIASED
chr1	846107	846257	-1.03	-4.08	0.0003804	0.003575	YOUNG-BIASED
chr1	855952	856102	-1.1	-3.83	0.0007285	0.005626	YOUNG-BIASED
chr1	859111	859261	-1.21	-3.45	0.001945	0.01127	YOUNG-BIASED
chr1	860263	860413	-1.31	-3.42	0.002079	0.01182	YOUNG-BIASED
chr1	861097	861247	-1.35	-4.89	4.619e-05	0.00085	YOUNG-BIASED
chr1	876926	877076	-1.14	-3.24	0.003283	0.01639	YOUNG-BIASED
chr1	877867	878017	-1.28	-2.91	0.007415	0.02948	YOUNG-BIASED
chr1	895981	896131	-1.65	-3.81	0.0007819	0.005907	YOUNG-BIASED
chr1	896793	896943	-1.11	-3.11	0.004491	0.02052	YOUNG-BIASED
chr1	902301	902451	-1.51	-4.51	0.0001239	0.001656	YOUNG-BIASED
chr1	911525	911675	-1.3	-3.63	0.00123	0.008146	YOUNG-BIASED
chr1	935487	935637	-0.81	-2.91	0.00737	0.02935	YOUNG-BIASED
chr1	940383	940533	-0.93	-2.61	0.01494	0.04894	YOUNG-BIASED
chr1	949747	949897	-0.88	-3.23	0.003336	0.01657	YOUNG-BIASED
chr1	956021	956171	-1.12	-3.2	0.003635	0.01763	YOUNG-BIASED
chr1	968679	968829	-1.59	-4.12	0.0003468	0.003354	YOUNG-BIASED
chr1	976095	976245	-1.38	-3.71	0.001002	0.007036	YOUNG-BIASED
chr1	986235	986385	-1.68	-4.02	0.0004527	0.00404	YOUNG-BIASED
chr1	994857	995007	-1.37	-3.79	0.000826	0.006137	YOUNG-BIASED
chr1	1004453	1004603	-1.75	-4.69	7.83e-05	0.001212	YOUNG-BIASED
chr1	1015335	1015485	-1.35	-3.94	0.00056	0.004678	YOUNG-BIASED
chr1	1059200	1059350	-1.56	-4.76	6.536e-05	0.001072	YOUNG-BIASED
chr1	1068349	1068499	-1.8	-5.62	6.826e-06	0.0002585	YOUNG-BIASED
chr1	1093547	1093697	-1.09	-3.15	0.004117	0.01928	YOUNG-BIASED
chr1	1109227	1109377	-0.87	-2.8	0.009656	0.03568	YOUNG-BIASED
chr1	1143710	1143860	-1.46	-5.15	2.302e-05	0.00054	YOUNG-BIASED
chr1	1148380	1148530	-1.23	-3.19	0.003689	0.01782	YOUNG-BIASED
chr1	1167085	1167235	-0.92	-3.08	0.004921	0.02192	YOUNG-BIASED
chr1	1167448	1167598	-1.15	-3.3	0.002831	0.01474	YOUNG-BIASED
chr1	1209217	1209367	-0.81	-2.77	0.01036	0.03755	YOUNG-BIASED
chr1	1227066	1227216	-1.39	-4.6	9.753e-05	0.001406	YOUNG-BIASED
chr1	1243373	1243523	-1.19	-3.28	0.002963	0.01522	YOUNG-BIASED
chr1	1260365	1260515	-1.37	-3.98	0.0004959	0.004302	YOUNG-BIASED
chr1	1284675	1284825	-2.09	-4.1	0.0003633	0.003462	YOUNG-BIASED
chr1	1307503	1307653	-1.16	-4.25	0.0002479	0.002659	YOUNG-BIASED
chr1	1335381	1335531	-0.78	-3.59	0.001358	0.008729	YOUNG-BIASED
chr1	1342539	1342689	-0.81	-2.92	0.007112	0.0286	YOUNG-BIASED
chr1	1365597	1365747	-1.79	-5.48	9.824e-06	0.0003189	YOUNG-BIASED
chr1	1368963	1369113	-1.17	-3.6	0.001331	0.008608	YOUNG-BIASED
chr1	1406578	1406728	-2.61	-6.93	2.486e-07	4.985e-05	YOUNG-BIASED
chr1	1406814	1406964	-1.21	-3.74	0.0009387	0.006717	YOUNG-BIASED
chr1	1440579	1440729	3.78	3.3	0.002848	0.0148	OLD-BIASED
chr1	1446924	1447074	-0.95	-3.23	0.003404	0.01682	YOUNG-BIASED
chr1	1475359	1475509	-2.24	-4.95	3.92e-05	0.0007638	YOUNG-BIASED
chr1	1479329	1479479	-1.32	-3.86	0.0006802	0.00536	YOUNG-BIASED
chr1	1481307	1481457	-0.98	-3.19	0.003759	0.01806	YOUNG-BIASED
chr1	1490243	1490393	-1.34	-5.65	6.259e-06	0.0002462	YOUNG-BIASED
chr1	1499693	1499843	-1.05	-3.2	0.00364	0.01765	YOUNG-BIASED
chr1	1509919	1510069	-1.51	-4.08	0.0003806	0.003576	YOUNG-BIASED
chr1	1510097	1510247	-1.26	-3.78	0.0008366	0.006192	YOUNG-BIASED
chr1	1532839	1532989	-2.14	-7.02	1.984e-07	4.49e-05	YOUNG-BIASED
chr1	1550517	1550667	-0.96	-3.45	0.001939	0.01125	YOUNG-BIASED
chr1	1550853	1551003	-1.38	-4.14	0.0003324	0.003257	YOUNG-BIASED
chr1	1560826	1560976	-1.39	-4.73	6.922e-05	0.001114	YOUNG-BIASED
chr1	1561223	1561373	-1.76	-4.86	5.026e-05	0.0008991	YOUNG-BIASED
chr1	1566279	1566429	-1.27	-3.18	0.003843	0.01835	YOUNG-BIASED
chr1	1581785	1581935	-1.94	-3.51	0.001678	0.01015	YOUNG-BIASED
chr1	1672523	1672673	-2.06	-3.79	0.0008131	0.006069	YOUNG-BIASED
chr1	1713953	1714103	-0.85	-3.09	0.004722	0.02128	YOUNG-BIASED
chr1	1719719	1719869	-1.41	-4.82	5.466e-05	0.0009505	YOUNG-BIASED
chr1	1765355	1765505	-1.59	-4.81	5.61e-05	0.0009677	YOUNG-BIASED
chr1	1790127	1790277	-1.16	-4.75	6.709e-05	0.001091	YOUNG-BIASED
chr1	1800874	1801024	-1.06	-3.64	0.001199	0.008	YOUNG-BIASED
chr1	1804653	1804803	-1.73	-5.08	2.766e-05	0.0006094	YOUNG-BIASED
chr1	1820905	1821055	-1.19	-4.32	0.0002054	0.002335	YOUNG-BIASED
chr1	1822318	1822468	-1.71	-4.02	0.0004498	0.004022	YOUNG-BIASED
chr1	1828733	1828883	-1.3	-4.4	0.0001657	0.002018	YOUNG-BIASED
chr1	1850287	1850437	-0.94	-3.12	0.004397	0.02021	YOUNG-BIASED
chr1	1875601	1875751	-0.93	-4.68	8.06e-05	0.001236	YOUNG-BIASED
chr1	1891719	1891869	-1.3	-5.12	2.51e-05	0.000572	YOUNG-BIASED
chr1	1921246	1921396	-1.13	-3.95	0.0005433	0.00458	YOUNG-BIASED
chr1	1921446	1921596	-2.7	-6.68	4.588e-07	6.57e-05	YOUNG-BIASED
chr1	1922305	1922455	-1.79	-5.54	8.379e-06	0.0002904	YOUNG-BIASED
chr1	1935065	1935215	-1.29	-4.07	0.0003917	0.003648	YOUNG-BIASED
chr1	1950543	1950693	-2.99	-6.4	9.216e-07	9.193e-05	YOUNG-BIASED
chr1	1951183	1951333	-1.6	-3.95	0.0005439	0.004584	YOUNG-BIASED
chr1	1957238	1957388	-2.02	-5.12	2.55e-05	0.0005779	YOUNG-BIASED
chr1	1976296	1976446	-1.58	-4.42	0.0001592	0.001963	YOUNG-BIASED
chr1	1977895	1978045	-1.48	-5.24	1.823e-05	0.0004646	YOUNG-BIASED
chr1	1981894	1982044	-1.2	-2.83	0.008836	0.03347	YOUNG-BIASED
chr1	2036218	2036368	-1.1	-3.73	0.0009495	0.006771	YOUNG-BIASED
chr1	2040103	2040253	-1.64	-4.04	0.0004326	0.003911	YOUNG-BIASED
chr1	2053283	2053433	3.11	3.13	0.004262	0.01976	OLD-BIASED
chr1	2064541	2064691	-0.85	-3.13	0.004279	0.01982	YOUNG-BIASED
chr1	2071390	2071540	-0.89	-3.39	0.002272	0.0126	YOUNG-BIASED
chr1	2071572	2071722	-1.43	-3.7	0.001041	0.007233	YOUNG-BIASED
chr1	2087425	2087575	-2.39	-6.48	7.58e-07	8.353e-05	YOUNG-BIASED
chr1	2091671	2091821	-0.99	-4.01	0.0004614	0.004094	YOUNG-BIASED
chr1	2105989	2106139	-1.13	-4.03	0.0004413	0.003967	YOUNG-BIASED
chr1	2121669	2121819	-0.77	-3.1	0.004611	0.02092	YOUNG-BIASED
chr1	2126745	2126895	-1.12	-3.64	0.001199	0.008002	YOUNG-BIASED
chr1	2130664	2130814	-0.87	-2.68	0.0126	0.04326	YOUNG-BIASED
chr1	2145925	2146075	-1.39	-4.57	0.000106	0.001488	YOUNG-BIASED
chr1	2158607	2158757	-2.02	-4.39	0.0001732	0.002081	YOUNG-BIASED
chr1	2162353	2162503	-1.06	-3.55	0.001515	0.009437	YOUNG-BIASED
chr1	2163273	2163423	-0.71	-3.14	0.004189	0.01952	YOUNG-BIASED
chr1	2171599	2171749	-1.07	-4.3	0.0002191	0.00244	YOUNG-BIASED
chr1	2171861	2172011	-0.66	-2.69	0.01251	0.04304	YOUNG-BIASED
chr1	2173661	2173811	-1.43	-5.52	8.817e-06	0.0002991	YOUNG-BIASED
chr1	2178033	2178183	-0.85	-4.71	7.306e-05	0.001157	YOUNG-BIASED
chr1	2180103	2180253	-1.78	-4.57	0.0001078	0.001505	YOUNG-BIASED
chr1	2183307	2183457	-1.28	-4.45	0.0001466	0.001856	YOUNG-BIASED
chr1	2187450	2187600	-1.21	-5.39	1.239e-05	0.0003658	YOUNG-BIASED
chr1	2198585	2198735	-0.64	-2.99	0.006126	0.02568	YOUNG-BIASED
chr1	2203807	2203957	-1.26	-3.75	0.0009134	0.006589	YOUNG-BIASED
chr1	2207763	2207913	-0.89	-3.59	0.001351	0.008696	YOUNG-BIASED
chr1	2210585	2210735	-1.19	-4.63	9.129e-05	0.001344	YOUNG-BIASED
chr1	2222610	2222760	-0.9	-3.38	0.002344	0.01288	YOUNG-BIASED
chr1	2232418	2232568	-0.87	-3.95	0.0005342	0.004525	YOUNG-BIASED
chr1	2236641	2236791	-1.18	-3.49	0.001746	0.01043	YOUNG-BIASED
chr1	2245551	2245701	-0.92	-2.88	0.007935	0.03096	YOUNG-BIASED
chr1	2253539	2253689	-1.04	-3.27	0.003083	0.01567	YOUNG-BIASED
chr1	2284935	2285085	-1.64	-4.97	3.701e-05	0.0007356	YOUNG-BIASED
chr1	2313179	2313329	-1.4	-4.8	5.872e-05	0.0009974	YOUNG-BIASED
chr1	2313482	2313632	-0.77	-3.08	0.004828	0.02163	YOUNG-BIASED
chr1	2323254	2323404	-1.36	-3.96	0.0005279	0.004487	YOUNG-BIASED
chr1	2323427	2323577	-1.59	-3.58	0.001381	0.00883	YOUNG-BIASED
chr1	2327607	2327757	-0.87	-3.56	0.001483	0.009296	YOUNG-BIASED
chr1	2340417	2340567	-1.28	-3.85	0.0007061	0.005501	YOUNG-BIASED
chr1	2344631	2344781	-1.28	-4.2	0.000284	0.002921	YOUNG-BIASED
chr1	2391395	2391545	-1.96	-5.24	1.857e-05	0.0004701	YOUNG-BIASED
chr1	2398439	2398589	-1.32	-4.28	0.0002301	0.002526	YOUNG-BIASED
chr1	2399575	2399725	-1.59	-3.3	0.002811	0.01467	YOUNG-BIASED
chr1	2406457	2406607	-0.99	-2.95	0.006693	0.02737	YOUNG-BIASED
chr1	2461491	2461641	-1.08	-2.91	0.007326	0.02923	YOUNG-BIASED
chr1	2464361	2464511	-1.06	-3.25	0.003236	0.01622	YOUNG-BIASED
chr1	2477347	2477497	-0.93	-2.95	0.006646	0.02724	YOUNG-BIASED
chr1	2487651	2487801	-0.89	-3.49	0.001753	0.01046	YOUNG-BIASED
chr1	2525533	2525683	-1.48	-5.41	1.175e-05	0.0003545	YOUNG-BIASED
chr1	2539085	2539235	-0.98	-3.05	0.005281	0.02307	YOUNG-BIASED
chr1	2542281	2542431	-1.27	-4.07	0.0004004	0.003705	YOUNG-BIASED
chr1	2574467	2574617	-1.23	-3.86	0.0006881	0.005404	YOUNG-BIASED
chr1	2703265	2703415	-1.21	-3.68	0.001071	0.00738	YOUNG-BIASED
chr1	2738501	2738651	-1.41	-3.88	0.0006542	0.005215	YOUNG-BIASED
chr1	2828263	2828413	-1.04	-3.79	0.000824	0.006126	YOUNG-BIASED
chr1	2845329	2845479	-0.79	-2.7	0.01214	0.04211	YOUNG-BIASED
chr1	2892475	2892625	-3.02	-5.37	1.306e-05	0.0003766	YOUNG-BIASED
chr1	2929169	2929319	-1.5	-3.4	0.00223	0.01243	YOUNG-BIASED
chr1	2952255	2952405	-0.9	-2.74	0.01103	0.03931	YOUNG-BIASED
chr1	2989503	2989653	-0.81	-2.85	0.008412	0.03229	YOUNG-BIASED
chr1	3017845	3017995	-0.91	-3.54	0.001545	0.009568	YOUNG-BIASED
chr1	3022177	3022327	-1.38	-4.21	0.0002748	0.002856	YOUNG-BIASED
chr1	3028510	3028660	-1.64	-5.21	1.97e-05	0.0004885	YOUNG-BIASED
chr1	3057017	3057167	-1.66	-4.55	0.0001131	0.001555	YOUNG-BIASED
chr1	3071919	3072069	-0.91	-3.33	0.002644	0.01404	YOUNG-BIASED
chr1	3077938	3078088	-1.21	-3.51	0.001676	0.01013	YOUNG-BIASED
chr1	3103442	3103592	-0.97	-3.71	0.0009927	0.00699	YOUNG-BIASED
chr1	3104139	3104289	-1.12	-4.05	0.000416	0.003804	YOUNG-BIASED
chr1	3115255	3115405	-1.11	-3.48	0.001812	0.01071	YOUNG-BIASED
chr1	3128657	3128807	-0.82	-2.6	0.01516	0.04946	YOUNG-BIASED
chr1	3136095	3136245	-1.4	-4.52	0.0001223	0.001642	YOUNG-BIASED
chr1	3138579	3138729	-0.91	-3.24	0.003291	0.01641	YOUNG-BIASED
chr1	3143295	3143445	-1.03	-2.76	0.0106	0.03818	YOUNG-BIASED
chr1	3154943	3155093	-1.86	-4.01	0.0004612	0.004093	YOUNG-BIASED
chr1	3164219	3164369	-1.32	-3.42	0.002092	0.01187	YOUNG-BIASED
chr1	3165509	3165659	-1.09	-3.19	0.003747	0.01802	YOUNG-BIASED
chr1	3175051	3175201	-1.88	-4.32	0.0002035	0.00232	YOUNG-BIASED
chr1	3187648	3187798	-1.03	-3.8	0.0008059	0.00603	YOUNG-BIASED
chr1	3200331	3200481	-1.26	-4.03	0.0004393	0.003954	YOUNG-BIASED
chr1	3200761	3200911	-1.93	-4.94	4.073e-05	0.0007828	YOUNG-BIASED
chr1	3233170	3233320	-1.3	-3.79	0.0008109	0.006058	YOUNG-BIASED
chr1	3236663	3236813	-1.66	-4.08	0.0003811	0.00358	YOUNG-BIASED
chr1	3239847	3239997	-1.26	-3.69	0.001053	0.007291	YOUNG-BIASED
chr1	3245328	3245478	-0.97	-3.72	0.0009831	0.006941	YOUNG-BIASED
chr1	3253896	3254046	-1.87	-5.93	3.073e-06	0.0001682	YOUNG-BIASED
chr1	3266317	3266467	-1.02	-3.02	0.005592	0.02403	YOUNG-BIASED
chr1	3284206	3284356	-3.48	-8.51	5.934e-09	8.105e-06	YOUNG-BIASED
chr1	3309429	3309579	-1.47	-3.74	0.000926	0.006652	YOUNG-BIASED
chr1	3310414	3310564	-1.31	-3.46	0.001889	0.01103	YOUNG-BIASED
chr1	3318905	3319055	-1.75	-4.74	6.779e-05	0.001099	YOUNG-BIASED
chr1	3371809	3371959	-1.2	-4.32	0.0002081	0.002355	YOUNG-BIASED
chr1	3388267	3388417	-1.34	-3.57	0.001435	0.009078	YOUNG-BIASED
chr1	3408155	3408305	-0.93	-3.52	0.001615	0.009869	YOUNG-BIASED
chr1	3418708	3418858	-1.35	-3.8	0.0008054	0.006028	YOUNG-BIASED
chr1	3456755	3456905	-1.07	-4.27	0.0002321	0.002542	YOUNG-BIASED
chr1	3462483	3462633	-1.42	-4.17	0.0003028	0.003052	YOUNG-BIASED
chr1	3467176	3467326	-1.55	-3.69	0.001059	0.007322	YOUNG-BIASED
chr1	3481929	3482079	-1.32	-2.71	0.01185	0.04139	YOUNG-BIASED
chr1	3503919	3504069	-1.43	-4.51	0.0001242	0.001659	YOUNG-BIASED
chr1	3507297	3507447	-1	-3.16	0.004013	0.01893	YOUNG-BIASED
chr1	3514926	3515076	-1.78	-4.48	0.0001354	0.001759	YOUNG-BIASED
chr1	3527843	3527993	-1.27	-3.91	0.0006045	0.004937	YOUNG-BIASED
chr1	3531820	3531970	-1.21	-3.87	0.0006669	0.005288	YOUNG-BIASED
chr1	3535581	3535731	-1.75	-5.7	5.49e-06	0.0002288	YOUNG-BIASED
chr1	3540995	3541145	-0.84	-3.45	0.001934	0.01122	YOUNG-BIASED
chr1	3541581	3541731	-1.18	-3.39	0.002267	0.01258	YOUNG-BIASED
chr1	3571223	3571373	-1.51	-5.76	4.796e-06	0.0002125	YOUNG-BIASED
chr1	3612341	3612491	-1.6	-4.18	0.0002974	0.003014	YOUNG-BIASED
chr1	3629751	3629901	-1.16	-2.65	0.01365	0.04586	YOUNG-BIASED
chr1	3634638	3634788	-1.54	-4.06	0.0004032	0.003723	YOUNG-BIASED
chr1	3641037	3641187	-0.86	-3.42	0.002076	0.01181	YOUNG-BIASED
chr1	3643949	3644099	-1.48	-4.23	0.0002624	0.002765	YOUNG-BIASED
chr1	3701719	3701869	-0.95	-3.37	0.002376	0.013	YOUNG-BIASED
chr1	3701918	3702068	-1.17	-3.37	0.002364	0.01296	YOUNG-BIASED
chr1	3702121	3702271	-1.23	-4.85	5.167e-05	0.000916	YOUNG-BIASED
chr1	3705550	3705700	-1.2	-4.56	0.0001101	0.001527	YOUNG-BIASED
chr1	3706667	3706817	-1.45	-5.42	1.161e-05	0.000352	YOUNG-BIASED
chr1	3712792	3712942	-1.25	-3.19	0.003763	0.01807	YOUNG-BIASED
chr1	3737976	3738126	-2.02	-5.84	3.826e-06	0.0001882	YOUNG-BIASED
chr1	3774204	3774354	-1.2	-4.24	0.0002555	0.002716	YOUNG-BIASED
chr1	3827729	3827879	-0.9	-2.99	0.006032	0.02539	YOUNG-BIASED
chr1	3843877	3844027	-3.84	-2.94	0.006826	0.02777	YOUNG-BIASED
chr1	4061114	4061264	-0.93	-3.01	0.005843	0.02482	YOUNG-BIASED
chr1	4168870	4169020	-0.64	-2.95	0.006684	0.02735	YOUNG-BIASED
chr1	4644969	4645119	-1.65	-3.23	0.003403	0.01682	YOUNG-BIASED
chr1	4645389	4645539	-0.98	-3.77	0.0008558	0.006293	YOUNG-BIASED
chr1	4673181	4673331	-1.1	-3.43	0.002029	0.01161	YOUNG-BIASED
chr1	4712607	4712757	-1.26	-3.47	0.001855	0.01089	YOUNG-BIASED
chr1	4718699	4718849	-1.07	-3.45	0.001957	0.01132	YOUNG-BIASED
chr1	4771107	4771257	-1.38	-3.77	0.0008649	0.00634	YOUNG-BIASED
chr1	4815599	4815749	-0.83	-3	0.005919	0.02505	YOUNG-BIASED
chr1	5217020	5217170	1.02	2.8	0.009651	0.03567	OLD-BIASED
chr1	5292063	5292213	-5.21	-4.63	9.216e-05	0.001352	YOUNG-BIASED
chr1	5339043	5339193	-1.56	-4.06	0.0004102	0.003769	YOUNG-BIASED
chr1	5485225	5485375	-1.5	-3.12	0.00442	0.02029	YOUNG-BIASED
chr1	5540209	5540359	-1.21	-3.37	0.002378	0.01301	YOUNG-BIASED
chr1	5570099	5570249	-1.2	-5.23	1.894e-05	0.0004765	YOUNG-BIASED
chr1	5574351	5574501	-1.46	-4.18	0.0002947	0.002995	YOUNG-BIASED
chr1	5720513	5720663	-2.33	-8.56	5.248e-09	7.653e-06	YOUNG-BIASED
chr1	5805741	5805891	-0.92	-3.57	0.001452	0.009157	YOUNG-BIASED
chr1	5831357	5831507	-0.77	-3	0.005986	0.02526	YOUNG-BIASED
chr1	5907385	5907535	-1.42	-5.02	3.294e-05	0.000682	YOUNG-BIASED
chr1	5917667	5917817	-1.19	-3.45	0.001931	0.01121	YOUNG-BIASED
chr1	5948775	5948925	-0.79	-2.63	0.01437	0.04761	YOUNG-BIASED
chr1	5995296	5995446	-0.86	-3.19	0.003761	0.01807	YOUNG-BIASED
chr1	6035425	6035575	-0.92	-3.42	0.002077	0.01181	YOUNG-BIASED
chr1	6062522	6062672	-1.12	-3.77	0.0008551	0.00629	YOUNG-BIASED
chr1	6094326	6094476	-0.95	-4.18	0.0002933	0.002986	YOUNG-BIASED
chr1	6112605	6112755	-1.25	-3.24	0.003307	0.01647	YOUNG-BIASED
chr1	6113019	6113169	-2.24	-5.84	3.845e-06	0.0001887	YOUNG-BIASED
chr1	6113271	6113421	-0.84	-3.46	0.001913	0.01114	YOUNG-BIASED
chr1	6118790	6118940	-1.85	-5.26	1.766e-05	0.0004554	YOUNG-BIASED
chr1	6140642	6140792	-1.47	-5.41	1.192e-05	0.0003576	YOUNG-BIASED
chr1	6142932	6143082	-0.95	-3.23	0.003387	0.01676	YOUNG-BIASED
chr1	6144075	6144225	-1.19	-3	0.005891	0.02496	YOUNG-BIASED
chr1	6158587	6158737	-1.94	-4.98	3.681e-05	0.0007331	YOUNG-BIASED
chr1	6169011	6169161	-1.57	-4.1	0.0003628	0.003459	YOUNG-BIASED
chr1	6188007	6188157	-1.95	-5.03	3.148e-05	0.0006623	YOUNG-BIASED
chr1	6208767	6208917	-1.82	-4.93	4.149e-05	0.0007914	YOUNG-BIASED
chr1	6221689	6221839	-0.95	-4.53	0.0001172	0.001594	YOUNG-BIASED
chr1	6224287	6224437	-1.71	-4.59	0.0001003	0.001433	YOUNG-BIASED
chr1	6253545	6253695	3.73	5.09	2.737e-05	0.0006052	OLD-BIASED
chr1	6266561	6266711	-1.4	-4.41	0.000163	0.001995	YOUNG-BIASED
chr1	6269279	6269429	-1.43	-4.41	0.0001609	0.001977	YOUNG-BIASED
chr1	6278538	6278688	-1.1	-3.91	0.0006005	0.004913	YOUNG-BIASED
chr1	6280450	6280600	-1.17	-2.91	0.007353	0.0293	YOUNG-BIASED
chr1	6282758	6282908	-1.45	-5.36	1.335e-05	0.0003818	YOUNG-BIASED
chr1	6282974	6283124	-1.74	-5.2	2.026e-05	0.0004973	YOUNG-BIASED
chr1	6283785	6283935	-0.79	-3.27	0.003082	0.01567	YOUNG-BIASED
chr1	6284705	6284855	-0.73	-2.65	0.01365	0.04586	YOUNG-BIASED
chr1	6284921	6285071	-0.78	-2.99	0.006079	0.02554	YOUNG-BIASED
chr1	6302292	6302442	-1.48	-3.55	0.001519	0.009456	YOUNG-BIASED
chr1	6305845	6305995	-1.25	-3.01	0.005712	0.0244	YOUNG-BIASED
chr1	6307055	6307205	-0.63	-2.6	0.01526	0.04972	YOUNG-BIASED
chr1	6321789	6321939	-1.41	-4.82	5.577e-05	0.0009643	YOUNG-BIASED
chr1	6322122	6322272	-1.02	-4.43	0.000154	0.00192	YOUNG-BIASED
chr1	6328313	6328463	-1.22	-3.31	0.002775	0.01453	YOUNG-BIASED
chr1	6329839	6329989	-0.57	-2.63	0.01414	0.04703	YOUNG-BIASED
chr1	6331823	6331973	-0.66	-3.1	0.004666	0.02109	YOUNG-BIASED
chr1	6336367	6336517	-1.15	-3.14	0.004222	0.01963	YOUNG-BIASED
chr1	6340949	6341099	-0.96	-2.95	0.006702	0.0274	YOUNG-BIASED
chr1	6347835	6347985	-3.58	-8.23	1.122e-08	1.079e-05	YOUNG-BIASED
chr1	6350201	6350351	-1.96	-5.84	3.85e-06	0.0001888	YOUNG-BIASED
chr1	6351323	6351473	-1.34	-4.19	0.000291	0.00297	YOUNG-BIASED
chr1	6353249	6353399	-1.06	-3.39	0.002263	0.01256	YOUNG-BIASED
chr1	6390068	6390218	-1.03	-3.35	0.002475	0.01339	YOUNG-BIASED
chr1	6395786	6395936	-1.23	-4.34	0.0001931	0.002238	YOUNG-BIASED
chr1	6396338	6396488	-1.34	-3.16	0.004053	0.01907	YOUNG-BIASED
chr1	6398872	6399022	-1.19	-3.64	0.001187	0.007944	YOUNG-BIASED
chr1	6403752	6403902	-1.49	-4.99	3.532e-05	0.0007143	YOUNG-BIASED
chr1	6410641	6410791	-1.22	-4.6	9.988e-05	0.001429	YOUNG-BIASED
chr1	6412075	6412225	-1.04	-2.84	0.008594	0.0328	YOUNG-BIASED
chr1	6434163	6434313	-1.08	-3.68	0.001088	0.007463	YOUNG-BIASED
chr1	6445721	6445871	-1.26	-4.64	8.806e-05	0.001312	YOUNG-BIASED
chr1	6453177	6453327	-1.15	-3.56	0.001471	0.009243	YOUNG-BIASED
chr1	6465081	6465231	-1.03	-2.72	0.01157	0.04068	YOUNG-BIASED
chr1	6500429	6500579	-1.66	-5.25	1.782e-05	0.000458	YOUNG-BIASED
chr1	6500643	6500793	-1.37	-4.39	0.00017	0.002054	YOUNG-BIASED
chr1	6508973	6509123	-1.19	-3.3	0.00285	0.01481	YOUNG-BIASED
chr1	6515628	6515778	-1.19	-3.67	0.001112	0.007578	YOUNG-BIASED
chr1	6520732	6520882	-1.18	-4.48	0.000136	0.001764	YOUNG-BIASED
chr1	6521390	6521540	-1.41	-4.44	0.000151	0.001895	YOUNG-BIASED
chr1	6535771	6535921	-1.44	-5.08	2.807e-05	0.0006151	YOUNG-BIASED
chr1	6545830	6545980	-1.9	-5.62	6.824e-06	0.0002584	YOUNG-BIASED
chr1	6550824	6550974	-1.03	-4.21	0.000276	0.002864	YOUNG-BIASED
chr1	6583847	6583997	-2.26	-6.78	3.615e-07	5.914e-05	YOUNG-BIASED
chr1	6605110	6605260	-2.95	-4.71	7.423e-05	0.001169	YOUNG-BIASED
chr1	6605309	6605459	-1.82	-5.11	2.611e-05	0.0005871	YOUNG-BIASED
chr1	6614819	6614969	-0.74	-3.28	0.002942	0.01515	YOUNG-BIASED
chr1	6640125	6640275	-1.02	-3.5	0.001722	0.01033	YOUNG-BIASED
chr1	6662313	6662463	-1.05	-3.31	0.002753	0.01445	YOUNG-BIASED
chr1	6674143	6674293	-1.07	-2.96	0.00655	0.02695	YOUNG-BIASED
chr1	6674374	6674524	-1.23	-2.88	0.007887	0.03082	YOUNG-BIASED
chr1	6685421	6685571	-1.45	-3.73	0.0009609	0.006829	YOUNG-BIASED
chr1	6694841	6694991	-1.32	-4.17	0.0003025	0.003051	YOUNG-BIASED
chr1	6698283	6698433	-0.67	-2.89	0.007733	0.03039	YOUNG-BIASED
chr1	6733029	6733179	3.78	3.18	0.00377	0.0181	OLD-BIASED
chr1	6761520	6761670	-1.23	-3.93	0.000573	0.004753	YOUNG-BIASED
chr1	6761735	6761885	-0.72	-2.73	0.01128	0.03994	YOUNG-BIASED
chr1	6780059	6780209	-0.97	-3.92	0.0005881	0.004842	YOUNG-BIASED
chr1	6787767	6787917	-0.82	-3.65	0.001174	0.007883	YOUNG-BIASED
chr1	6854035	6854185	-6.74	-5.09	2.753e-05	0.0006075	YOUNG-BIASED
chr1	6855905	6856055	-5.53	-8.44	6.845e-09	8.409e-06	YOUNG-BIASED
chr1	6861073	6861223	-2.33	-4.27	0.0002324	0.002544	YOUNG-BIASED
chr1	6862227	6862377	-1.68	-5.48	9.716e-06	0.0003169	YOUNG-BIASED
chr1	6891551	6891701	-7.7	-6.1	2.008e-06	0.0001348	YOUNG-BIASED
chr1	6919937	6920087	-4.95	-3.94	0.0005592	0.004674	YOUNG-BIASED
chr1	6926983	6927133	2.02	2.62	0.01445	0.04778	OLD-BIASED
chr1	6950071	6950221	-1.03	-3.23	0.003341	0.01659	YOUNG-BIASED
chr1	6966940	6967090	-0.86	-2.67	0.01284	0.04386	YOUNG-BIASED
chr1	6972383	6972533	-1.25	-3.19	0.003721	0.01793	YOUNG-BIASED
chr1	6982777	6982927	-1.12	-4.01	0.0004671	0.004129	YOUNG-BIASED
chr1	6984635	6984785	-2.59	-5.43	1.109e-05	0.0003425	YOUNG-BIASED
chr1	6995731	6995881	-1.31	-4.26	0.0002392	0.002594	YOUNG-BIASED
chr1	7020511	7020661	-0.81	-3.39	0.002281	0.01263	YOUNG-BIASED
chr1	7022789	7022939	-1.37	-4.79	6.065e-05	0.00102	YOUNG-BIASED
chr1	7031303	7031453	-2.43	-5.77	4.648e-06	0.0002092	YOUNG-BIASED
chr1	7032553	7032703	-1.23	-4.68	7.981e-05	0.001228	YOUNG-BIASED
chr1	7045373	7045523	-1.18	-2.9	0.007584	0.02996	YOUNG-BIASED
chr1	7058474	7058624	-1.52	-4.09	0.0003716	0.003518	YOUNG-BIASED
chr1	7102703	7102853	-1	-2.81	0.009276	0.03465	YOUNG-BIASED
chr1	7106485	7106635	-1.19	-4.23	0.0002632	0.002771	YOUNG-BIASED
chr1	7130277	7130427	-0.95	-3.39	0.00228	0.01263	YOUNG-BIASED
chr1	7130455	7130605	-1.29	-5.56	8.08e-06	0.0002841	YOUNG-BIASED
chr1	7135482	7135632	-1.77	-5.55	8.292e-06	0.0002885	YOUNG-BIASED
chr1	7177823	7177973	-1.41	-4.28	0.0002267	0.0025	YOUNG-BIASED
chr1	7267943	7268093	-0.97	-3.45	0.001954	0.01131	YOUNG-BIASED
chr1	7268137	7268287	-1.35	-4.6	9.798e-05	0.00141	YOUNG-BIASED
chr1	7269471	7269621	-1.64	-2.95	0.006742	0.02752	YOUNG-BIASED
chr1	7278427	7278577	-1.73	-4.61	9.626e-05	0.001393	YOUNG-BIASED
chr1	7341921	7342071	-0.65	-2.64	0.01377	0.04613	YOUNG-BIASED
chr1	7342101	7342251	-1.16	-3.67	0.001124	0.007637	YOUNG-BIASED
chr1	7359579	7359729	-0.86	-3.4	0.002215	0.01237	YOUNG-BIASED
chr1	7394441	7394591	-1.82	-6.97	2.264e-07	4.8e-05	YOUNG-BIASED
chr1	7394625	7394775	-2.23	-6.8	3.37e-07	5.741e-05	YOUNG-BIASED
chr1	7401671	7401821	-0.9	-3.35	0.002469	0.01337	YOUNG-BIASED
chr1	7407080	7407230	-1.31	-3.42	0.002078	0.01182	YOUNG-BIASED
chr1	7434139	7434289	-0.71	-2.69	0.01236	0.04267	YOUNG-BIASED
chr1	7439633	7439783	-0.77	-2.6	0.01537	0.04997	YOUNG-BIASED
chr1	7449473	7449623	-0.92	-4.38	0.0001746	0.002092	YOUNG-BIASED
chr1	7462017	7462167	-1.56	-3.25	0.003232	0.0162	YOUNG-BIASED
chr1	7480687	7480837	-0.85	-3.02	0.005608	0.02408	YOUNG-BIASED
chr1	7480921	7481071	-0.94	-3.32	0.002703	0.01426	YOUNG-BIASED
chr1	7514281	7514431	-1.01	-3.33	0.00266	0.0141	YOUNG-BIASED
chr1	7516041	7516191	-0.96	-3.29	0.002922	0.01508	YOUNG-BIASED
chr1	7529580	7529730	-1.19	-5.08	2.795e-05	0.0006132	YOUNG-BIASED
chr1	7537375	7537525	-0.87	-3.18	0.003829	0.0183	YOUNG-BIASED
chr1	7538945	7539095	-2.06	-5.01	3.363e-05	0.0006915	YOUNG-BIASED
chr1	7545988	7546138	-1.15	-4.04	0.0004328	0.003912	YOUNG-BIASED
chr1	7551615	7551765	-3.24	-6.45	8.122e-07	8.659e-05	YOUNG-BIASED
chr1	7551863	7552013	-1.25	-5.17	2.218e-05	0.0005269	YOUNG-BIASED
chr1	7556195	7556345	-0.68	-2.81	0.009245	0.03457	YOUNG-BIASED
chr1	7557119	7557269	-0.91	-3.06	0.005078	0.02243	YOUNG-BIASED
chr1	7569018	7569168	-1.03	-3.96	0.0005301	0.0045	YOUNG-BIASED
chr1	7569191	7569341	-1.04	-3.42	0.00211	0.01195	YOUNG-BIASED
chr1	7576581	7576731	-1.21	-4.68	7.987e-05	0.001228	YOUNG-BIASED
chr1	7578117	7578267	-1.32	-3.93	0.000563	0.004695	YOUNG-BIASED
chr1	7594415	7594565	-1.05	-3.79	0.0008272	0.006144	YOUNG-BIASED
chr1	7597653	7597803	-0.83	-3.05	0.005253	0.02298	YOUNG-BIASED
chr1	7599125	7599275	-1.01	-3.8	0.0008042	0.006023	YOUNG-BIASED
chr1	7599406	7599556	-1.41	-4.03	0.0004417	0.00397	YOUNG-BIASED
chr1	7599820	7599970	-1.17	-4.26	0.0002428	0.002621	YOUNG-BIASED
chr1	7609601	7609751	-1.92	-5.08	2.826e-05	0.0006177	YOUNG-BIASED
chr1	7617221	7617371	4.92	4.41	0.0001609	0.001977	OLD-BIASED
chr1	7634623	7634773	-1.11	-2.95	0.006671	0.02731	YOUNG-BIASED
chr1	7637345	7637495	-1.29	-4.45	0.0001453	0.001845	YOUNG-BIASED
chr1	7641799	7641949	-1.34	-5.35	1.368e-05	0.0003882	YOUNG-BIASED
chr1	7641967	7642117	-1.19	-3.91	0.0006064	0.004947	YOUNG-BIASED
chr1	7646316	7646466	-1.09	-3.63	0.001218	0.008091	YOUNG-BIASED
chr1	7673533	7673683	-1.55	-5.53	8.658e-06	0.0002959	YOUNG-BIASED
chr1	7676578	7676728	-1.14	-3.9	0.0006089	0.004962	YOUNG-BIASED
chr1	7676847	7676997	-1.56	-5.09	2.75e-05	0.0006071	YOUNG-BIASED
chr1	7677133	7677283	-1.57	-3.97	0.0005095	0.004381	YOUNG-BIASED
chr1	7684123	7684273	-0.93	-3.02	0.005632	0.02416	YOUNG-BIASED
chr1	7698060	7698210	-1.44	-3.63	0.001228	0.008138	YOUNG-BIASED
chr1	7698308	7698458	-1.01	-3.63	0.001226	0.008129	YOUNG-BIASED
chr1	7702335	7702485	-1.41	-4.59	0.0001007	0.001437	YOUNG-BIASED
chr1	7703689	7703839	-1.17	-3.43	0.002041	0.01166	YOUNG-BIASED
chr1	7705391	7705541	-1.3	-3.58	0.001409	0.00896	YOUNG-BIASED
chr1	7707224	7707374	-1.42	-4.13	0.0003342	0.003269	YOUNG-BIASED
chr1	7733077	7733227	-1.29	-3.91	0.0005964	0.004889	YOUNG-BIASED
chr1	7740740	7740890	-1.19	-2.79	0.009716	0.03584	YOUNG-BIASED
chr1	7762506	7762656	-0.93	-4.49	0.0001334	0.001741	YOUNG-BIASED
chr1	7764455	7764605	-2.22	-4.46	0.0001436	0.00183	YOUNG-BIASED
chr1	7779848	7779998	-1.16	-2.84	0.008669	0.03301	YOUNG-BIASED
chr1	7786774	7786924	-0.93	-3.3	0.002815	0.01468	YOUNG-BIASED
chr1	7812971	7813121	-1.15	-3.89	0.0006376	0.005122	YOUNG-BIASED
chr1	7830079	7830229	-1	-2.75	0.01071	0.03847	YOUNG-BIASED
chr1	7831083	7831233	-0.67	-2.64	0.01404	0.04681	YOUNG-BIASED
chr1	7844330	7844480	-1.28	-3.35	0.002493	0.01346	YOUNG-BIASED
chr1	7868432	7868582	-3.75	-6.11	1.953e-06	0.000133	YOUNG-BIASED
chr1	7946433	7946583	-2.25	-6.26	1.311e-06	0.0001088	YOUNG-BIASED
chr1	8000904	8001054	-1.43	-3.86	0.0006852	0.005387	YOUNG-BIASED
chr1	8035403	8035553	-0.83	-3.23	0.003347	0.01661	YOUNG-BIASED
chr1	8042527	8042677	-0.97	-3.92	0.000577	0.004776	YOUNG-BIASED
chr1	8079861	8080011	-4.5	-4.04	0.0004281	0.003881	YOUNG-BIASED
chr1	8091504	8091654	-5.35	-6.35	1.06e-06	9.825e-05	YOUNG-BIASED
chr1	8108342	8108492	-1.08	-3.71	0.001003	0.007037	YOUNG-BIASED
chr1	8123731	8123881	-1.42	-3.15	0.004114	0.01927	YOUNG-BIASED
chr1	8136899	8137049	2.52	3.31	0.002769	0.01451	OLD-BIASED
chr1	8137829	8137979	-1.03	-2.62	0.01459	0.04812	YOUNG-BIASED
chr1	8143782	8143932	-1.18	-2.78	0.0101	0.03688	YOUNG-BIASED
chr1	8156945	8157095	-1.88	-2.62	0.01453	0.04798	YOUNG-BIASED
chr1	8194025	8194175	-2.04	-3.28	0.003014	0.01542	YOUNG-BIASED
chr1	8215217	8215367	-5.47	-4.69	7.815e-05	0.00121	YOUNG-BIASED
chr1	8234439	8234589	-1.22	-3.04	0.005357	0.0233	YOUNG-BIASED
chr1	8242291	8242441	-1.37	-3.71	0.001008	0.007065	YOUNG-BIASED
chr1	8262471	8262621	-0.85	-2.82	0.009085	0.03414	YOUNG-BIASED
chr1	8277269	8277419	-0.96	-3.11	0.00452	0.02061	YOUNG-BIASED
chr1	8298513	8298663	-1.01	-2.93	0.006964	0.02817	YOUNG-BIASED
chr1	8298971	8299121	-0.93	-3.23	0.00335	0.01663	YOUNG-BIASED
chr1	8326839	8326989	-4.35	-4	0.0004722	0.004159	YOUNG-BIASED
chr1	8354221	8354371	-0.91	-2.96	0.006486	0.02675	YOUNG-BIASED
chr1	8378143	8378293	-1.52	-4.74	6.904e-05	0.001112	YOUNG-BIASED
chr1	8412639	8412789	-1.18	-4.2	0.0002804	0.002896	YOUNG-BIASED
chr1	8422903	8423053	-0.87	-3.31	0.002763	0.01449	YOUNG-BIASED
chr1	8423865	8424015	-1.26	-3.57	0.001424	0.009027	YOUNG-BIASED
chr1	8424509	8424659	-1.51	-5.1	2.685e-05	0.0005974	YOUNG-BIASED
chr1	8429138	8429288	1.49	2.89	0.007631	0.0301	OLD-BIASED
chr1	8431265	8431415	-1.06	-2.94	0.006791	0.02766	YOUNG-BIASED
chr1	8446295	8446445	-1.71	-3.58	0.001395	0.008895	YOUNG-BIASED
chr1	8469128	8469278	-1.14	-3.6	0.001336	0.00863	YOUNG-BIASED
chr1	8472434	8472584	-0.95	-2.6	0.01517	0.0495	YOUNG-BIASED
chr1	8481978	8482128	-1.1	-3.25	0.003223	0.01617	YOUNG-BIASED
chr1	8482516	8482666	-1.35	-3.83	0.000738	0.005676	YOUNG-BIASED
chr1	8483870	8484020	-1	-3.12	0.004396	0.02021	YOUNG-BIASED
chr1	8499069	8499219	-1.03	-4.12	0.0003502	0.003378	YOUNG-BIASED
chr1	8499324	8499474	-1.61	-3.11	0.004511	0.02058	YOUNG-BIASED
chr1	8509401	8509551	-1.86	-7.22	1.217e-07	3.505e-05	YOUNG-BIASED
chr1	8509694	8509844	-3.18	-6.43	8.631e-07	8.902e-05	YOUNG-BIASED
chr1	8516509	8516659	-1.84	-2.79	0.009837	0.03616	YOUNG-BIASED
chr1	8520565	8520715	-5.14	-4.95	3.918e-05	0.0007634	YOUNG-BIASED
chr1	8523538	8523688	-1.37	-4.25	0.0002458	0.002643	YOUNG-BIASED
chr1	8524115	8524265	-2.7	-4.95	3.95e-05	0.0007674	YOUNG-BIASED
chr1	8534358	8534508	-3.27	-3.39	0.002288	0.01266	YOUNG-BIASED
chr1	8552999	8553149	6.26	7.27	1.079e-07	3.31e-05	OLD-BIASED
chr1	8557625	8557775	-1.86	-3.13	0.004319	0.01995	YOUNG-BIASED
chr1	8570449	8570599	-1.85	-5.17	2.231e-05	0.0005288	YOUNG-BIASED
chr1	8570863	8571013	-1.02	-2.82	0.009133	0.03427	YOUNG-BIASED
chr1	8571855	8572005	-1.22	-2.92	0.007222	0.02892	YOUNG-BIASED
chr1	8577656	8577806	-7.38	-6.31	1.156e-06	0.0001024	YOUNG-BIASED
chr1	8578145	8578295	1.54	2.78	0.009953	0.03648	OLD-BIASED
chr1	8618425	8618575	2.66	3.38	0.002291	0.01267	OLD-BIASED
chr1	8621562	8621712	-2.14	-5.3	1.589e-05	0.0004262	YOUNG-BIASED
chr1	8631767	8631917	-1.33	-2.93	0.007016	0.02832	YOUNG-BIASED
chr1	8632086	8632236	-6.51	-5.97	2.796e-06	0.0001606	YOUNG-BIASED
chr1	8640859	8641009	3.03	3.91	0.0005971	0.004893	OLD-BIASED
chr1	8658628	8658778	-0.99	-3.17	0.003895	0.01852	YOUNG-BIASED
chr1	8659059	8659209	-0.85	-3.02	0.005589	0.02402	YOUNG-BIASED
chr1	8672603	8672753	-3.99	-2.95	0.006636	0.02721	YOUNG-BIASED
chr1	8690291	8690441	-1.67	-3.95	0.0005429	0.004578	YOUNG-BIASED
chr1	8699569	8699719	-4.56	-3.91	0.000603	0.004929	YOUNG-BIASED
chr1	8701411	8701561	-5.49	-5.78	4.523e-06	0.0002061	YOUNG-BIASED
chr1	8709185	8709335	-1.98	-3.19	0.003764	0.01808	YOUNG-BIASED
chr1	8731109	8731259	-1.34	-2.66	0.01321	0.04477	YOUNG-BIASED
chr1	8761190	8761340	-0.82	-2.75	0.01079	0.03869	YOUNG-BIASED
chr1	8761617	8761767	-0.79	-2.86	0.008222	0.03176	YOUNG-BIASED
chr1	8762270	8762420	-1.04	-3.6	0.001316	0.008541	YOUNG-BIASED
chr1	8763057	8763207	-0.8	-3.24	0.00332	0.01652	YOUNG-BIASED
chr1	8763286	8763436	-0.96	-3.21	0.003569	0.0174	YOUNG-BIASED
chr1	8772321	8772471	-3.9	-6.48	7.603e-07	8.369e-05	YOUNG-BIASED
chr1	8786567	8786717	-1.02	-3.44	0.001984	0.01143	YOUNG-BIASED
chr1	8786756	8786906	-2.06	-5.59	7.39e-06	0.0002699	YOUNG-BIASED
chr1	8788319	8788469	-2.96	-4.35	0.0001884	0.002201	YOUNG-BIASED
chr1	8797233	8797383	-5.18	-4.88	4.787e-05	0.0008704	YOUNG-BIASED
chr1	8814361	8814511	-5.2	-6.17	1.675e-06	0.0001235	YOUNG-BIASED
chr1	8840566	8840716	-3.15	-3.96	0.000521	0.004449	YOUNG-BIASED
chr1	8875015	8875165	-1.34	-4.35	0.0001921	0.00223	YOUNG-BIASED
chr1	8876845	8876995	-1.66	-5.32	1.503e-05	0.0004116	YOUNG-BIASED
chr1	8877703	8877853	-0.84	-2.8	0.009528	0.03533	YOUNG-BIASED
chr1	8882497	8882647	2.49	3.98	0.0005	0.004326	OLD-BIASED
chr1	8882978	8883128	-2.22	-5.31	1.548e-05	0.0004198	YOUNG-BIASED
chr1	8904643	8904793	-1.01	-3.54	0.001549	0.009589	YOUNG-BIASED
chr1	8904801	8904951	-1.01	-3.52	0.001625	0.009911	YOUNG-BIASED
chr1	8909274	8909424	-0.83	-2.9	0.007557	0.02988	YOUNG-BIASED
chr1	8918274	8918424	-1.43	-4.59	0.0001003	0.001434	YOUNG-BIASED
chr1	8918443	8918593	-1.59	-4.05	0.0004191	0.003824	YOUNG-BIASED
chr1	8936971	8937121	2.88	3.36	0.00246	0.01333	OLD-BIASED
chr1	8949887	8950037	-2.55	-6.73	4.037e-07	6.195e-05	YOUNG-BIASED
chr1	8975266	8975416	-3.38	-6.4	9.225e-07	9.196e-05	YOUNG-BIASED
chr1	8978280	8978430	-2.11	-5.21	1.965e-05	0.0004876	YOUNG-BIASED
chr1	9001975	9002125	-3.7	-6.07	2.123e-06	0.0001386	YOUNG-BIASED
chr1	9023009	9023159	-1.16	-3.41	0.00217	0.01219	YOUNG-BIASED
chr1	9070173	9070323	-0.94	-3.38	0.002337	0.01285	YOUNG-BIASED
chr1	9135169	9135319	-1.4	-4.29	0.0002219	0.002463	YOUNG-BIASED
chr1	9161667	9161817	-1.18	-3.83	0.0007455	0.005717	YOUNG-BIASED
chr1	9194859	9195009	-1.37	-4.24	0.0002521	0.00269	YOUNG-BIASED
chr1	9195190	9195340	-0.77	-3.44	0.001975	0.01139	YOUNG-BIASED
chr1	9202317	9202467	-1.13	-3.35	0.002504	0.0135	YOUNG-BIASED
chr1	9210944	9211094	-1.32	-4.42	0.0001593	0.001964	YOUNG-BIASED
chr1	9294955	9295105	-1.16	-3.76	0.000883	0.006431	YOUNG-BIASED
chr1	9312013	9312163	-1.4	-3.96	0.0005219	0.004454	YOUNG-BIASED
chr1	9330613	9330763	-0.79	-2.75	0.01073	0.03854	YOUNG-BIASED
chr1	9362881	9363031	-1.08	-3.3	0.002808	0.01466	YOUNG-BIASED
chr1	9363184	9363334	-2.07	-5.46	1.035e-05	0.0003286	YOUNG-BIASED
chr1	9378095	9378245	-1.34	-3.99	0.0004818	0.004216	YOUNG-BIASED
chr1	9378281	9378431	-0.86	-2.69	0.01226	0.04243	YOUNG-BIASED
chr1	9386732	9386882	-0.77	-2.75	0.01079	0.0387	YOUNG-BIASED
chr1	9470944	9471094	-1.25	-4.04	0.0004276	0.003878	YOUNG-BIASED
chr1	9473399	9473549	-0.94	-3.04	0.005385	0.02338	YOUNG-BIASED
chr1	9550987	9551137	6.43	5.63	6.626e-06	0.0002545	OLD-BIASED
chr1	9555464	9555614	-1.11	-3.33	0.002596	0.01386	YOUNG-BIASED
chr1	9602488	9602638	-2.19	-6.69	4.449e-07	6.484e-05	YOUNG-BIASED
chr1	9621556	9621706	-4.37	-8.28	9.909e-09	1.006e-05	YOUNG-BIASED
chr1	9633841	9633991	-1.6	-5.78	4.488e-06	0.0002053	YOUNG-BIASED
chr1	9643472	9643622	-2.52	-6.4	9.248e-07	9.206e-05	YOUNG-BIASED
chr1	9649220	9649370	-0.9	-3.49	0.001761	0.0105	YOUNG-BIASED
chr1	9653467	9653617	-1.52	-4.45	0.000147	0.00186	YOUNG-BIASED
chr1	9656713	9656863	-1.22	-4.73	7.016e-05	0.001124	YOUNG-BIASED
chr1	9664227	9664377	-1.8	-4.68	7.927e-05	0.001222	YOUNG-BIASED
chr1	9664393	9664543	-1.53	-4.53	0.0001171	0.001593	YOUNG-BIASED
chr1	9762377	9762527	-1.96	-7.12	1.558e-07	4.016e-05	YOUNG-BIASED
chr1	9781935	9782085	-1.32	-4.58	0.0001041	0.001469	YOUNG-BIASED
chr1	9815574	9815724	-1.21	-4.45	0.000148	0.001868	YOUNG-BIASED
chr1	9816070	9816220	-3.38	-5.62	6.759e-06	0.0002572	YOUNG-BIASED
chr1	9820031	9820181	-1.04	-2.68	0.0128	0.04376	YOUNG-BIASED
chr1	9830411	9830561	-1.56	-4.02	0.0004462	0.004	YOUNG-BIASED
chr1	9844687	9844837	-1.77	-5.19	2.111e-05	0.0005111	YOUNG-BIASED
chr1	9875333	9875483	-2.16	-5.06	2.914e-05	0.0006298	YOUNG-BIASED
chr1	9884051	9884201	-1.42	-3.98	0.0004989	0.00432	YOUNG-BIASED
chr1	9884475	9884625	-0.7	-2.64	0.01384	0.04632	YOUNG-BIASED
chr1	9896201	9896351	-1.13	-3.48	0.001789	0.01062	YOUNG-BIASED
chr1	9902987	9903137	-1.6	-5.91	3.21e-06	0.0001717	YOUNG-BIASED
chr1	9908161	9908311	-1.61	-4.84	5.281e-05	0.0009287	YOUNG-BIASED
chr1	9910155	9910305	-2.37	-5.42	1.152e-05	0.0003505	YOUNG-BIASED
chr1	9912654	9912804	-1.14	-3.94	0.0005508	0.004625	YOUNG-BIASED
chr1	9919669	9919819	-1.2	-4.47	0.0001402	0.0018	YOUNG-BIASED
chr1	9927553	9927703	-0.99	-4.21	0.0002728	0.002841	YOUNG-BIASED
chr1	9927753	9927903	-0.8	-3.56	0.001471	0.009243	YOUNG-BIASED
chr1	9935413	9935563	-1.05	-3.17	0.0039	0.01854	YOUNG-BIASED
chr1	9936993	9937143	-1.17	-5.05	3.047e-05	0.0006486	YOUNG-BIASED
chr1	9937219	9937369	-1.01	-4.48	0.0001369	0.001771	YOUNG-BIASED
chr1	9938342	9938492	-1.41	-4.49	0.000133	0.001737	YOUNG-BIASED
chr1	9950473	9950623	-1.21	-5.07	2.871e-05	0.000624	YOUNG-BIASED
chr1	9953033	9953183	-1.27	-3.92	0.0005765	0.004774	YOUNG-BIASED
chr1	9970069	9970219	-1.1	-3.4	0.002229	0.01242	YOUNG-BIASED
chr1	9989415	9989565	-2.35	-4.19	0.0002927	0.002982	YOUNG-BIASED
chr1	10010575	10010725	-1.03	-3.94	0.0005561	0.004657	YOUNG-BIASED
chr1	10021173	10021323	-0.78	-2.82	0.009078	0.03412	YOUNG-BIASED
chr1	10051067	10051217	-2.37	-4.92	4.241e-05	0.0008026	YOUNG-BIASED
chr1	10057389	10057539	-1.17	-3.02	0.005596	0.02404	YOUNG-BIASED
chr1	10067541	10067691	-1.47	-2.87	0.008037	0.03125	YOUNG-BIASED
chr1	10080875	10081025	-1.9	-5.24	1.847e-05	0.0004687	YOUNG-BIASED
chr1	10091197	10091347	6.57	6.74	3.997e-07	6.167e-05	OLD-BIASED
chr1	10117877	10118027	-0.99	-2.84	0.008624	0.03288	YOUNG-BIASED
chr1	10126824	10126974	5.78	4.57	0.0001078	0.001505	OLD-BIASED
chr1	10127165	10127315	-1.79	-5.16	2.251e-05	0.0005317	YOUNG-BIASED
chr1	10168744	10168894	-3.44	-2.74	0.01102	0.03928	YOUNG-BIASED
chr1	10184018	10184168	6.49	6.35	1.046e-06	9.785e-05	OLD-BIASED
chr1	10209439	10209589	-6.92	-6.33	1.11e-06	0.0001006	YOUNG-BIASED
chr1	10215173	10215323	-1.17	-3	0.005992	0.02527	YOUNG-BIASED
chr1	10215329	10215479	-2.04	-4.76	6.515e-05	0.00107	YOUNG-BIASED
chr1	10230294	10230444	-4.26	-3.33	0.002649	0.01406	YOUNG-BIASED
chr1	10257041	10257191	-3.54	-3.31	0.002762	0.01448	YOUNG-BIASED
chr1	10261524	10261674	-2.04	-4.79	6.002e-05	0.001013	YOUNG-BIASED
chr1	10272626	10272776	2.05	2.77	0.01029	0.03736	OLD-BIASED
chr1	10273645	10273795	-2.47	-3.68	0.00108	0.007425	YOUNG-BIASED
chr1	10292175	10292325	-2.63	-6.14	1.776e-06	0.0001271	YOUNG-BIASED
chr1	10314029	10314179	-1.36	-3.67	0.001122	0.007628	YOUNG-BIASED
chr1	10325021	10325171	3.39	3.3	0.002804	0.01464	OLD-BIASED
chr1	10345449	10345599	-4.04	-3.43	0.002033	0.01163	YOUNG-BIASED
chr1	10346705	10346855	-1.51	-3.14	0.00424	0.01969	YOUNG-BIASED
chr1	10359558	10359708	-6.42	-6.4	9.184e-07	9.176e-05	YOUNG-BIASED
chr1	10398190	10398340	-1.26	-4.58	0.0001052	0.001481	YOUNG-BIASED
chr1	10399877	10400027	-1.85	-5.75	4.864e-06	0.000214	YOUNG-BIASED
chr1	10448049	10448199	-1.95	-5.44	1.093e-05	0.0003396	YOUNG-BIASED
chr1	10459416	10459566	-1.22	-3.72	0.0009664	0.006855	YOUNG-BIASED
chr1	10488225	10488375	-1.28	-4.12	0.0003451	0.003343	YOUNG-BIASED
chr1	10490619	10490769	-0.74	-2.61	0.01495	0.04897	YOUNG-BIASED
chr1	10510675	10510825	-1.25	-3.16	0.003981	0.01881	YOUNG-BIASED
chr1	10511467	10511617	-0.81	-3.35	0.002498	0.01348	YOUNG-BIASED
chr1	10535294	10535444	-0.62	-3.15	0.004111	0.01926	YOUNG-BIASED
chr1	10567643	10567793	-1.35	-5.15	2.355e-05	0.000548	YOUNG-BIASED
chr1	10571039	10571189	-1.07	-3.96	0.0005281	0.004488	YOUNG-BIASED
chr1	10574669	10574819	-1.62	-3.95	0.0005392	0.004556	YOUNG-BIASED
chr1	10588911	10589061	-0.99	-3.05	0.005288	0.02309	YOUNG-BIASED
chr1	10598163	10598313	-0.89	-3.33	0.002651	0.01406	YOUNG-BIASED
chr1	10599537	10599687	-1.39	-4.23	0.000258	0.002733	YOUNG-BIASED
chr1	10600785	10600935	-1.85	-6.33	1.094e-06	9.985e-05	YOUNG-BIASED
chr1	10688889	10689039	-1.53	-4.16	0.0003109	0.003108	YOUNG-BIASED
chr1	10695271	10695421	-2.06	-4.95	3.92e-05	0.0007637	YOUNG-BIASED
chr1	10698443	10698593	-1.58	-3.85	0.0007013	0.005476	YOUNG-BIASED
chr1	10699153	10699303	-2.13	-4.2	0.000283	0.002914	YOUNG-BIASED
chr1	10699829	10699979	-1.14	-3.77	0.0008601	0.006316	YOUNG-BIASED
chr1	10703875	10704025	-1.01	-4.12	0.0003457	0.003347	YOUNG-BIASED
chr1	10723569	10723719	-1.04	-2.84	0.008665	0.033	YOUNG-BIASED
chr1	10732645	10732795	-2.44	-5.67	6.067e-06	0.0002416	YOUNG-BIASED
chr1	10738136	10738286	-1.29	-4.98	3.664e-05	0.0007309	YOUNG-BIASED
chr1	10753551	10753701	-1.75	-4.97	3.775e-05	0.000745	YOUNG-BIASED
chr1	10755863	10756013	-1.43	-4.88	4.734e-05	0.0008644	YOUNG-BIASED
chr1	10769921	10770071	-1.02	-3.05	0.00521	0.02285	YOUNG-BIASED
chr1	10772792	10772942	-0.76	-2.79	0.009841	0.03617	YOUNG-BIASED
chr1	10773173	10773323	-1.94	-5.24	1.849e-05	0.000469	YOUNG-BIASED
chr1	10774857	10775007	-1.08	-3.55	0.001503	0.009385	YOUNG-BIASED
chr1	10777564	10777714	-1.54	-4.82	5.592e-05	0.0009658	YOUNG-BIASED
chr1	10796721	10796871	-0.86	-3.58	0.0014	0.008919	YOUNG-BIASED
chr1	10816257	10816407	-1.62	-4.27	0.000232	0.002541	YOUNG-BIASED
chr1	10820055	10820205	-0.93	-3.34	0.002555	0.0137	YOUNG-BIASED
chr1	10822029	10822179	-1.17	-3.91	0.0005998	0.004909	YOUNG-BIASED
chr1	10825975	10826125	-1.74	-5.19	2.108e-05	0.0005106	YOUNG-BIASED
chr1	10836403	10836553	-0.72	-2.66	0.01341	0.04527	YOUNG-BIASED
chr1	10839051	10839201	-1.88	-5.87	3.591e-06	0.0001818	YOUNG-BIASED
chr1	10843018	10843168	-0.89	-2.96	0.006566	0.02699	YOUNG-BIASED
chr1	10846578	10846728	-1.04	-4.99	3.502e-05	0.0007102	YOUNG-BIASED
chr1	10848787	10848937	-1.14	-2.91	0.007336	0.02925	YOUNG-BIASED
chr1	10875385	10875535	-0.77	-2.62	0.01458	0.0481	YOUNG-BIASED
chr1	10880136	10880286	-1.21	-4.25	0.0002447	0.002635	YOUNG-BIASED
chr1	10882883	10883033	-1.2	-5.09	2.757e-05	0.0006081	YOUNG-BIASED
chr1	10895971	10896121	-1.39	-4.08	0.0003812	0.00358	YOUNG-BIASED
chr1	10923049	10923199	-1.07	-3.57	0.001424	0.009028	YOUNG-BIASED
chr1	10965277	10965427	-1.19	-3.8	0.0007948	0.005974	YOUNG-BIASED
chr1	10965465	10965615	-1.61	-3.81	0.0007845	0.005921	YOUNG-BIASED
chr1	11000139	11000289	-1.4	-4.38	0.0001757	0.002101	YOUNG-BIASED
chr1	11002241	11002391	-1.45	-4.7	7.633e-05	0.001191	YOUNG-BIASED
chr1	11003963	11004113	-1.86	-5.31	1.536e-05	0.0004179	YOUNG-BIASED
chr1	11004343	11004493	-0.9	-3.33	0.002616	0.01393	YOUNG-BIASED
chr1	11012145	11012295	-1.51	-3.76	0.000878	0.006405	YOUNG-BIASED
chr1	11017287	11017437	-1.71	-4.35	0.0001912	0.002223	YOUNG-BIASED
chr1	11020989	11021139	-0.74	-2.87	0.008109	0.03145	YOUNG-BIASED
chr1	11022640	11022790	-1.45	-7.06	1.775e-07	4.273e-05	YOUNG-BIASED
chr1	11028520	11028670	-0.88	-3.15	0.004143	0.01937	YOUNG-BIASED
chr1	11098166	11098316	-1.56	-4.29	0.0002242	0.002481	YOUNG-BIASED
chr1	11105745	11105895	-0.95	-3.83	0.0007302	0.005635	YOUNG-BIASED
chr1	11113277	11113427	-0.81	-3.77	0.0008515	0.00627	YOUNG-BIASED
chr1	11120089	11120239	-1.23	-3.62	0.001278	0.008365	YOUNG-BIASED
chr1	11169386	11169536	-4.17	-3.68	0.001088	0.007466	YOUNG-BIASED
chr1	11203995	11204145	-1.78	-3.29	0.002889	0.01495	YOUNG-BIASED
chr1	11218153	11218303	-1.63	-4.13	0.0003346	0.003271	YOUNG-BIASED
chr1	11234381	11234531	-1.65	-4.58	0.0001033	0.001462	YOUNG-BIASED
chr1	11237951	11238101	-1.12	-3.09	0.004796	0.02152	YOUNG-BIASED
chr1	11248272	11248422	-3.42	-3.18	0.0038	0.0182	YOUNG-BIASED
chr1	11301799	11301949	-2.3	-6.08	2.085e-06	0.0001373	YOUNG-BIASED
chr1	11342234	11342384	-1	-3.14	0.004159	0.01942	YOUNG-BIASED
chr1	11352792	11352942	-1.4	-4.35	0.0001879	0.002197	YOUNG-BIASED
chr1	11380373	11380523	-0.7	-3.25	0.003227	0.01619	YOUNG-BIASED
chr1	11397752	11397902	-2.08	-6.37	9.962e-07	9.553e-05	YOUNG-BIASED
chr1	11402877	11403027	-0.74	-2.92	0.007101	0.02857	YOUNG-BIASED
chr1	11444034	11444184	-1.02	-3.53	0.001602	0.009815	YOUNG-BIASED
chr1	11472401	11472551	-1.2	-2.93	0.007045	0.02841	YOUNG-BIASED
chr1	11514051	11514201	-0.75	-2.76	0.01053	0.03801	YOUNG-BIASED
chr1	11538785	11538935	-2.11	-5.57	7.689e-06	0.000276	YOUNG-BIASED
chr1	11544190	11544340	-1.06	-3.9	0.0006093	0.004964	YOUNG-BIASED
chr1	11546379	11546529	-0.86	-2.85	0.008442	0.03238	YOUNG-BIASED
chr1	11561679	11561829	-1.09	-3.53	0.001591	0.009768	YOUNG-BIASED
chr1	11610793	11610943	-1.37	-3.44	0.001986	0.01144	YOUNG-BIASED
chr1	11654363	11654513	-0.72	-2.9	0.007477	0.02965	YOUNG-BIASED
chr1	11660473	11660623	-3.39	-3.38	0.002303	0.01272	YOUNG-BIASED
chr1	11702487	11702637	-1.55	-5.58	7.592e-06	0.0002742	YOUNG-BIASED
chr1	11705834	11705984	-1.1	-4.64	8.939e-05	0.001326	YOUNG-BIASED
chr1	11710581	11710731	-1.01	-3.11	0.004556	0.02074	YOUNG-BIASED
chr1	11724288	11724438	-1.2	-3.71	0.001006	0.007055	YOUNG-BIASED
chr1	11741105	11741255	-1.27	-3.88	0.0006416	0.005145	YOUNG-BIASED
chr1	11741515	11741665	-1.26	-4.57	0.0001055	0.001484	YOUNG-BIASED
chr1	11751609	11751759	-1.39	-3.06	0.005179	0.02275	YOUNG-BIASED
chr1	11761333	11761483	-0.88	-2.74	0.01109	0.03948	YOUNG-BIASED
chr1	11767835	11767985	-1.72	-5.52	8.78e-06	0.0002985	YOUNG-BIASED
chr1	11771320	11771470	-1.02	-3.32	0.00271	0.01429	YOUNG-BIASED
chr1	11779677	11779827	-0.77	-3.28	0.002962	0.01522	YOUNG-BIASED
chr1	11792717	11792867	-0.76	-3.07	0.00501	0.02221	YOUNG-BIASED
chr1	11796559	11796709	-0.85	-2.8	0.009542	0.03537	YOUNG-BIASED
chr1	11844933	11845083	-1.33	-4.74	6.745e-05	0.001095	YOUNG-BIASED
chr1	11845167	11845317	-1.15	-5.01	3.347e-05	0.0006892	YOUNG-BIASED
chr1	11857791	11857941	-0.85	-2.67	0.01302	0.0443	YOUNG-BIASED
chr1	11897731	11897881	-1.11	-4.39	0.00017	0.002055	YOUNG-BIASED
chr1	11902515	11902665	-0.95	-3.44	0.001977	0.0114	YOUNG-BIASED
chr1	11905157	11905307	5.48	5.53	8.547e-06	0.0002938	OLD-BIASED
chr1	11905968	11906118	-0.96	-4	0.0004755	0.004179	YOUNG-BIASED
chr1	11907937	11908087	-0.9	-2.84	0.008703	0.0331	YOUNG-BIASED
chr1	11919151	11919301	-1	-3.91	0.0005923	0.004866	YOUNG-BIASED
chr1	11934780	11934930	-1.52	-4.78	6.228e-05	0.001038	YOUNG-BIASED
chr1	11941963	11942113	-1.67	-5.98	2.718e-06	0.000158	YOUNG-BIASED
chr1	11968512	11968662	-0.92	-3.19	0.003705	0.01788	YOUNG-BIASED
chr1	11970878	11971028	1.49	3.24	0.003316	0.0165	OLD-BIASED
chr1	11991314	11991464	-1.47	-4.22	0.0002699	0.00282	YOUNG-BIASED
chr1	11994706	11994856	-0.8	-3.1	0.004636	0.021	YOUNG-BIASED
chr1	11999024	11999174	-1.44	-3.48	0.00178	0.01058	YOUNG-BIASED
chr1	12000644	12000794	-1.23	-3.25	0.003245	0.01625	YOUNG-BIASED
chr1	12004311	12004461	-1.38	-4.91	4.35e-05	0.0008161	YOUNG-BIASED
chr1	12004685	12004835	-1.16	-3.85	0.0007053	0.005497	YOUNG-BIASED
chr1	12027851	12028001	5.38	5.53	8.598e-06	0.0002947	OLD-BIASED
chr1	12065735	12065885	-0.97	-2.77	0.01019	0.0371	YOUNG-BIASED
chr1	12091377	12091527	-1.4	-5.06	2.975e-05	0.0006381	YOUNG-BIASED
chr1	12094535	12094685	-1.55	-5.28	1.673e-05	0.0004401	YOUNG-BIASED
chr1	12098667	12098817	-0.72	-2.6	0.01526	0.04972	YOUNG-BIASED
chr1	12104303	12104453	-1.27	-4.53	0.0001176	0.001598	YOUNG-BIASED
chr1	12128221	12128371	-0.93	-2.7	0.01216	0.04215	YOUNG-BIASED
chr1	12174019	12174169	-1.33	-4.73	7.043e-05	0.001127	YOUNG-BIASED
chr1	12193171	12193321	-1.18	-3.63	0.00123	0.008147	YOUNG-BIASED
chr1	12221889	12222039	-1.02	-3.72	0.0009836	0.006943	YOUNG-BIASED
chr1	12228697	12228847	-1.16	-3.83	0.000729	0.005629	YOUNG-BIASED
chr1	12235238	12235388	-0.92	-3	0.00586	0.02487	YOUNG-BIASED
chr1	12244501	12244651	-0.8	-3	0.005891	0.02496	YOUNG-BIASED
chr1	12268905	12269055	-0.59	-2.95	0.006709	0.02742	YOUNG-BIASED
chr1	12340076	12340226	-2.25	-5.2	2.04e-05	0.0004993	YOUNG-BIASED
chr1	12351084	12351234	-2.27	-5.07	2.898e-05	0.0006276	YOUNG-BIASED
chr1	12374466	12374616	-3.78	-5.8	4.236e-06	0.0001991	YOUNG-BIASED
chr1	12441049	12441199	-3.72	-3.49	0.001735	0.01039	YOUNG-BIASED
chr1	12462549	12462699	-1.31	-2.99	0.00613	0.02569	YOUNG-BIASED
chr1	12467583	12467733	-2.22	-4.71	7.34e-05	0.00116	YOUNG-BIASED
chr1	12484199	12484349	-4.48	-3.93	0.0005712	0.004744	YOUNG-BIASED
chr1	12501885	12502035	-5.25	-4.19	0.0002866	0.00294	YOUNG-BIASED
chr1	12510614	12510764	1.38	2.97	0.006376	0.02642	OLD-BIASED
chr1	12511680	12511830	1.19	3.55	0.001501	0.009377	OLD-BIASED
chr1	12518435	12518585	2.45	3.13	0.004355	0.02008	OLD-BIASED
chr1	12535237	12535387	0.94	2.79	0.009785	0.03602	OLD-BIASED
chr1	12554697	12554847	-0.94	-3.46	0.001912	0.01113	YOUNG-BIASED
chr1	12555856	12556006	-0.67	-2.85	0.008521	0.0326	YOUNG-BIASED
chr1	12556658	12556808	-1.03	-3.11	0.004568	0.02078	YOUNG-BIASED
chr1	12559773	12559923	-0.57	-2.62	0.01449	0.04789	YOUNG-BIASED
chr1	12561843	12561993	-1.46	-4.64	8.781e-05	0.00131	YOUNG-BIASED
chr1	12564705	12564855	-0.66	-2.61	0.01484	0.04871	YOUNG-BIASED
chr1	12570926	12571076	-1.45	-3.6	0.00132	0.008556	YOUNG-BIASED
chr1	12573423	12573573	-0.79	-2.61	0.015	0.04909	YOUNG-BIASED
chr1	12579485	12579635	-0.9	-3.17	0.00387	0.01843	YOUNG-BIASED
chr1	12589513	12589663	-1.22	-3.4	0.002189	0.01226	YOUNG-BIASED
chr1	12605083	12605233	-1.42	-4.53	0.0001174	0.001596	YOUNG-BIASED
chr1	12613409	12613559	-0.89	-3.56	0.001463	0.009206	YOUNG-BIASED
chr1	12625239	12625389	-1.38	-3.29	0.002907	0.01502	YOUNG-BIASED
chr1	12677491	12677641	-1.54	-2.92	0.007215	0.0289	YOUNG-BIASED
chr1	12682248	12682398	-0.7	-2.69	0.01231	0.04255	YOUNG-BIASED
chr1	12710010	12710160	-2.6	-4.34	0.0001941	0.002245	YOUNG-BIASED
chr1	12719082	12719232	-1.07	-2.98	0.006204	0.02591	YOUNG-BIASED
chr1	12806107	12806257	-1.17	-3.64	0.001191	0.007961	YOUNG-BIASED
chr1	13862003	13862153	-1.43	-3.52	0.001628	0.009928	YOUNG-BIASED
chr1	13870399	13870549	-1.21	-3.6	0.001343	0.00866	YOUNG-BIASED
chr1	13978107	13978257	-3.01	-3.92	0.0005835	0.004814	YOUNG-BIASED
chr1	13992505	13992655	-0.65	-2.86	0.008355	0.03214	YOUNG-BIASED
chr1	14001818	14001968	-2.1	-2.63	0.01418	0.04714	YOUNG-BIASED
chr1	14026719	14026869	-1.41	-3.7	0.001027	0.007162	YOUNG-BIASED
chr1	14027155	14027305	-1.01	-3.05	0.005238	0.02293	YOUNG-BIASED
chr1	14033851	14034001	-2.88	-4.11	0.0003537	0.003401	YOUNG-BIASED
chr1	14054715	14054865	-1.51	-2.9	0.007621	0.03007	YOUNG-BIASED
chr1	14064008	14064158	-1.29	-2.85	0.008564	0.03272	YOUNG-BIASED
chr1	14085581	14085731	-2.21	-3.15	0.004124	0.01931	YOUNG-BIASED
chr1	14102055	14102205	-2.03	-6.37	1.009e-06	9.61e-05	YOUNG-BIASED
chr1	14133865	14134015	-1.18	-4.73	7.091e-05	0.001132	YOUNG-BIASED
chr1	14219415	14219565	-1.16	-3.69	0.00105	0.007277	YOUNG-BIASED
chr1	14283001	14283151	-1.22	-3.01	0.005809	0.02471	YOUNG-BIASED
chr1	14292321	14292471	-1.03	-3.74	0.0009198	0.00662	YOUNG-BIASED
chr1	14357776	14357926	-1.13	-2.84	0.008605	0.03283	YOUNG-BIASED
chr1	14421570	14421720	-1.1	-3.33	0.002649	0.01406	YOUNG-BIASED
chr1	14435269	14435419	-1.15	-2.83	0.008823	0.03343	YOUNG-BIASED
chr1	14468293	14468443	-1.52	-3.57	0.001422	0.00902	YOUNG-BIASED
chr1	14494427	14494577	1.63	2.62	0.01444	0.04776	OLD-BIASED
chr1	14564969	14565119	2.59	3.45	0.00195	0.01129	OLD-BIASED
chr1	14580543	14580693	-2.5	-2.92	0.00717	0.02877	YOUNG-BIASED
chr1	14692589	14692739	-5.71	-8.01	1.85e-08	1.422e-05	YOUNG-BIASED
chr1	14698522	14698672	-6.77	-6.43	8.655e-07	8.906e-05	YOUNG-BIASED
chr1	14740593	14740743	-1.43	-3.16	0.004031	0.01899	YOUNG-BIASED
chr1	14763587	14763737	-1.34	-3.53	0.00157	0.009678	YOUNG-BIASED
chr1	14822691	14822841	-2.21	-3.61	0.001304	0.008483	YOUNG-BIASED
chr1	14873013	14873163	-2.46	-3.18	0.003829	0.0183	YOUNG-BIASED
chr1	14925108	14925258	-0.91	-2.8	0.009601	0.03553	YOUNG-BIASED
chr1	14927547	14927697	-1.16	-3.16	0.003965	0.01876	YOUNG-BIASED
chr1	14940747	14940897	-1.74	-3.05	0.005228	0.0229	YOUNG-BIASED
chr1	14952237	14952387	-0.76	-2.63	0.01432	0.04748	YOUNG-BIASED
chr1	14994559	14994709	-1.76	-3.58	0.001403	0.008931	YOUNG-BIASED
chr1	15058427	15058577	-0.7	-3.31	0.00275	0.01444	YOUNG-BIASED
chr1	15088326	15088476	-1.82	-5.22	1.916e-05	0.0004801	YOUNG-BIASED
chr1	15105684	15105834	-1.15	-4.26	0.0002425	0.002619	YOUNG-BIASED
chr1	15113011	15113161	-1.03	-2.98	0.006282	0.02614	YOUNG-BIASED
chr1	15137835	15137985	-6.08	-5.68	5.828e-06	0.0002365	YOUNG-BIASED
chr1	15152714	15152864	-0.69	-2.69	0.01246	0.04292	YOUNG-BIASED
chr1	15214281	15214431	-1.45	-3.84	0.0007254	0.005609	YOUNG-BIASED
chr1	15242029	15242179	-1.44	-5.94	2.995e-06	0.0001657	YOUNG-BIASED
chr1	15247732	15247882	-1.68	-5.39	1.244e-05	0.0003667	YOUNG-BIASED
chr1	15251251	15251401	-1.38	-3.69	0.001063	0.007343	YOUNG-BIASED
chr1	15255220	15255370	-0.86	-3.79	0.0008177	0.006093	YOUNG-BIASED
chr1	15255737	15255887	-1.9	-2.88	0.007882	0.03081	YOUNG-BIASED
chr1	15256240	15256390	-1.43	-4.91	4.313e-05	0.0008113	YOUNG-BIASED
chr1	15269539	15269689	-1.07	-2.73	0.01138	0.04021	YOUNG-BIASED
chr1	15269753	15269903	-0.82	-3.14	0.00422	0.01962	YOUNG-BIASED
chr1	15282647	15282797	-1.19	-3.54	0.001537	0.009533	YOUNG-BIASED
chr1	15283413	15283563	-1	-3.91	0.0006011	0.004917	YOUNG-BIASED
chr1	15295121	15295271	-0.94	-3.26	0.003147	0.0159	YOUNG-BIASED
chr1	15334867	15335017	-0.76	-3.1	0.004663	0.02109	YOUNG-BIASED
chr1	15341071	15341221	-1.2	-4.37	0.0001793	0.002129	YOUNG-BIASED
chr1	15347829	15347979	-1.56	-5.28	1.639e-05	0.0004347	YOUNG-BIASED
chr1	15352783	15352933	-0.78	-3	0.005946	0.02513	YOUNG-BIASED
chr1	15359843	15359993	-1.52	-3.61	0.001282	0.008386	YOUNG-BIASED
chr1	15373275	15373425	-0.71	-2.81	0.009311	0.03475	YOUNG-BIASED
chr1	15383433	15383583	-0.83	-3.31	0.002746	0.01442	YOUNG-BIASED
chr1	15407717	15407867	-0.69	-2.99	0.006042	0.02542	YOUNG-BIASED
chr1	15416041	15416191	-1.13	-3.14	0.004206	0.01958	YOUNG-BIASED
chr1	15416977	15417127	-1.06	-2.6	0.01532	0.04985	YOUNG-BIASED
chr1	15426891	15427041	-1.26	-4.17	0.0003034	0.003057	YOUNG-BIASED
chr1	15438862	15439012	-1.01	-3.8	0.0007861	0.005929	YOUNG-BIASED
chr1	15443495	15443645	-1.14	-3.6	0.001332	0.008613	YOUNG-BIASED
chr1	15468570	15468720	-1.58	-3.94	0.0005532	0.004639	YOUNG-BIASED
chr1	15480377	15480527	-1.13	-3.25	0.003171	0.01599	YOUNG-BIASED
chr1	15514203	15514353	-0.61	-2.63	0.01426	0.04732	YOUNG-BIASED
chr1	15515267	15515417	-2.1	-8.69	3.916e-09	6.692e-06	YOUNG-BIASED
chr1	15527150	15527300	-2.65	-5.78	4.536e-06	0.0002064	YOUNG-BIASED
chr1	15539557	15539707	-1.47	-4.33	0.0002023	0.00231	YOUNG-BIASED
chr1	15541210	15541360	-1.14	-4.23	0.0002576	0.00273	YOUNG-BIASED
chr1	15572699	15572849	2.27	5.24	1.821e-05	0.0004643	OLD-BIASED
chr1	15573763	15573913	-1.86	-5.22	1.948e-05	0.0004851	YOUNG-BIASED
chr1	15599038	15599188	-1.11	-4.7	7.64e-05	0.001191	YOUNG-BIASED
chr1	15610122	15610272	-1.36	-4.13	0.0003405	0.003311	YOUNG-BIASED
chr1	15611121	15611271	-1.21	-3.24	0.00325	0.01627	YOUNG-BIASED
chr1	15611325	15611475	-1.86	-3.69	0.001069	0.007369	YOUNG-BIASED
chr1	15631384	15631534	-0.81	-3.59	0.001355	0.008714	YOUNG-BIASED
chr1	15650039	15650189	-1.09	-5.17	2.232e-05	0.0005289	YOUNG-BIASED
chr1	15655429	15655579	-1.72	-6.64	5.032e-07	6.875e-05	YOUNG-BIASED
chr1	15664387	15664537	-1.21	-4.81	5.609e-05	0.0009677	YOUNG-BIASED
chr1	15666974	15667124	-1.27	-4.1	0.0003675	0.003491	YOUNG-BIASED
chr1	15679087	15679237	-1.09	-3.26	0.003108	0.01576	YOUNG-BIASED
chr1	15697935	15698085	-1.73	-6.11	1.917e-06	0.000132	YOUNG-BIASED
chr1	15703613	15703763	-1.1	-4.16	0.0003165	0.003147	YOUNG-BIASED
chr1	15710977	15711127	-1.23	-4.2	0.0002842	0.002922	YOUNG-BIASED
chr1	15712771	15712921	-1.19	-4.25	0.000244	0.00263	YOUNG-BIASED
chr1	15727865	15728015	-0.86	-2.76	0.01051	0.03795	YOUNG-BIASED
chr1	15728029	15728179	-1.39	-3.83	0.0007302	0.005635	YOUNG-BIASED
chr1	15733844	15733994	-0.9	-3.02	0.005692	0.02434	YOUNG-BIASED
chr1	15736249	15736399	-1.68	-4.78	6.14e-05	0.001028	YOUNG-BIASED
chr1	15742853	15743003	-0.94	-2.98	0.006143	0.02573	YOUNG-BIASED
chr1	15744058	15744208	-0.95	-3.08	0.004842	0.02167	YOUNG-BIASED
chr1	15745838	15745988	-0.65	-2.69	0.01244	0.04286	YOUNG-BIASED
chr1	15753667	15753817	-1.19	-3.88	0.000652	0.005203	YOUNG-BIASED
chr1	15804449	15804599	3.23	3.46	0.001905	0.0111	OLD-BIASED
chr1	15819151	15819301	-1.14	-3.67	0.001116	0.007598	YOUNG-BIASED
chr1	15819434	15819584	-0.8	-2.81	0.009252	0.03459	YOUNG-BIASED
chr1	15828051	15828201	-1.49	-5.42	1.154e-05	0.0003508	YOUNG-BIASED
chr1	15847809	15847959	2.1	3.04	0.005332	0.02322	OLD-BIASED
chr1	15911301	15911451	-1.12	-3.1	0.004678	0.02114	YOUNG-BIASED
chr1	15911470	15911620	-1.23	-3.96	0.0005258	0.004475	YOUNG-BIASED
chr1	15921759	15921909	-2.69	-5.93	3.064e-06	0.0001677	YOUNG-BIASED
chr1	15946986	15947136	-3.33	-4.13	0.0003422	0.003322	YOUNG-BIASED
chr1	15983396	15983546	-4.94	-4.75	6.685e-05	0.001089	YOUNG-BIASED
chr1	16012577	16012727	-0.88	-2.76	0.0105	0.03793	YOUNG-BIASED
chr1	16018083	16018233	-0.93	-3.2	0.003655	0.01771	YOUNG-BIASED
chr1	16030089	16030239	-1.21	-4.36	0.0001867	0.002188	YOUNG-BIASED
chr1	16041107	16041257	-1	-2.89	0.007714	0.03033	YOUNG-BIASED
chr1	16041292	16041442	-0.8	-3.03	0.005455	0.0236	YOUNG-BIASED
chr1	16067839	16067989	-1.08	-4.27	0.0002348	0.002562	YOUNG-BIASED
chr1	16084158	16084308	-1.12	-3.92	0.000589	0.004846	YOUNG-BIASED
chr1	16084709	16084859	-1	-4.16	0.0003087	0.003092	YOUNG-BIASED
chr1	16087553	16087703	-1.36	-4.58	0.0001046	0.001474	YOUNG-BIASED
chr1	16087727	16087877	-1.23	-3.9	0.0006156	0.005	YOUNG-BIASED
chr1	16088363	16088513	-1.7	-5.4	1.197e-05	0.0003582	YOUNG-BIASED
chr1	16107223	16107373	-1.68	-3.87	0.0006714	0.005312	YOUNG-BIASED
chr1	16118592	16118742	-0.75	-3.12	0.004458	0.02042	YOUNG-BIASED
chr1	16121740	16121890	-2.53	-3.38	0.002304	0.01272	YOUNG-BIASED
chr1	16142153	16142303	-1.43	-4.69	7.775e-05	0.001206	YOUNG-BIASED
chr1	16152387	16152537	-2.26	-3.78	0.0008447	0.006235	YOUNG-BIASED
chr1	16153569	16153719	-3.46	-3.24	0.003298	0.01644	YOUNG-BIASED
chr1	16170543	16170693	-4.83	-3.98	0.0005042	0.004351	YOUNG-BIASED
chr1	16179376	16179526	1.21	3.02	0.005582	0.024	OLD-BIASED
chr1	16193055	16193205	4.28	3.74	0.0009379	0.006713	OLD-BIASED
chr1	16213557	16213707	2.63	3.94	0.0005547	0.004648	OLD-BIASED
chr1	16265959	16266109	-1.08	-4.37	0.0001823	0.002154	YOUNG-BIASED
chr1	16282733	16282883	-1.32	-4.3	0.0002175	0.002428	YOUNG-BIASED
chr1	16302067	16302217	-1.49	-4.63	9.066e-05	0.001338	YOUNG-BIASED
chr1	16302355	16302505	-0.82	-3.03	0.00554	0.02387	YOUNG-BIASED
chr1	16375229	16375379	-0.71	-3.53	0.001605	0.009827	YOUNG-BIASED
chr1	16375451	16375601	-0.94	-3.31	0.002758	0.01447	YOUNG-BIASED
chr1	16387787	16387937	-1.2	-3.88	0.000654	0.005214	YOUNG-BIASED
chr1	16394072	16394222	-0.78	-2.82	0.00913	0.03427	YOUNG-BIASED
chr1	16399236	16399386	-0.72	-2.99	0.006131	0.02569	YOUNG-BIASED
chr1	16400019	16400169	-2.11	-5.01	3.404e-05	0.0006972	YOUNG-BIASED
chr1	16401871	16402021	-0.97	-3.68	0.001071	0.007379	YOUNG-BIASED
chr1	16408938	16409088	-1.18	-4.17	0.0003064	0.003077	YOUNG-BIASED
chr1	16454260	16454410	-1.73	-5.62	6.902e-06	0.0002599	YOUNG-BIASED
chr1	16454713	16454863	-1.59	-4.1	0.0003632	0.003462	YOUNG-BIASED
chr1	16460481	16460631	-1.24	-4.75	6.573e-05	0.001076	YOUNG-BIASED
chr1	16465503	16465653	-1.72	-5.33	1.465e-05	0.0004051	YOUNG-BIASED
chr1	16468085	16468235	-0.88	-3.64	0.001213	0.008065	YOUNG-BIASED
chr1	16471939	16472089	-1.28	-4.13	0.0003407	0.003313	YOUNG-BIASED
chr1	16480658	16480808	-1.07	-3.41	0.002147	0.0121	YOUNG-BIASED
chr1	16485623	16485773	-1.46	-4.64	8.972e-05	0.001329	YOUNG-BIASED
chr1	16491515	16491665	-1.25	-3.65	0.001156	0.007794	YOUNG-BIASED
chr1	16494221	16494371	-1.4	-4.48	0.0001363	0.001766	YOUNG-BIASED
chr1	16501053	16501203	-0.86	-2.88	0.007991	0.03112	YOUNG-BIASED
chr1	16502363	16502513	-0.65	-2.97	0.006385	0.02645	YOUNG-BIASED
chr1	16508611	16508761	-0.92	-3.13	0.004309	0.01992	YOUNG-BIASED
chr1	16514268	16514418	-0.87	-4.01	0.0004583	0.004074	YOUNG-BIASED
chr1	16514473	16514623	-0.64	-3.11	0.004495	0.02053	YOUNG-BIASED
chr1	16539303	16539453	0.79	2.76	0.01061	0.03821	OLD-BIASED
chr1	16563511	16563661	-1.09	-4	0.0004701	0.004149	YOUNG-BIASED
chr1	16570994	16571144	-0.91	-3.84	0.0007171	0.005563	YOUNG-BIASED
chr1	16603306	16603456	-3.3	-4.71	7.432e-05	0.00117	YOUNG-BIASED
chr1	16627027	16627177	-2.19	-4.37	0.0001806	0.00214	YOUNG-BIASED
chr1	16689917	16690067	-3.46	-7.2	1.288e-07	3.629e-05	YOUNG-BIASED
chr1	16702248	16702398	-1.77	-3.77	0.0008568	0.006299	YOUNG-BIASED
chr1	16713395	16713545	-0.72	-2.82	0.009044	0.03403	YOUNG-BIASED
chr1	16767335	16767485	-1.18	-4.77	6.319e-05	0.001048	YOUNG-BIASED
chr1	16825207	16825357	-0.89	-2.95	0.006613	0.02714	YOUNG-BIASED
chr1	16825709	16825859	-1.18	-3.63	0.001216	0.008077	YOUNG-BIASED
chr1	16918384	16918534	0.75	2.81	0.009278	0.03466	OLD-BIASED
chr1	16932213	16932363	-0.87	-3.63	0.001217	0.008085	YOUNG-BIASED
chr1	16942542	16942692	-2.07	-5.77	4.573e-06	0.0002074	YOUNG-BIASED
chr1	16951541	16951691	-1.17	-4.35	0.0001888	0.002203	YOUNG-BIASED
chr1	16971241	16971391	0.84	3.73	0.0009455	0.00675	OLD-BIASED
chr1	17082048	17082198	-1.06	-2.97	0.006402	0.0265	YOUNG-BIASED
chr1	17208385	17208535	1.45	2.73	0.01134	0.04011	OLD-BIASED
chr1	17209623	17209773	-2.79	-5.1	2.627e-05	0.0005893	YOUNG-BIASED
chr1	17222822	17222972	1.12	3.09	0.004758	0.0214	OLD-BIASED
chr1	17229601	17229751	1.84	2.93	0.007056	0.02844	OLD-BIASED
chr1	17231709	17231859	-2.05	-4.67	8.307e-05	0.001262	YOUNG-BIASED
chr1	17240658	17240808	-1.53	-4.16	0.0003128	0.00312	YOUNG-BIASED
chr1	17248425	17248575	-1.13	-3.64	0.001212	0.008059	YOUNG-BIASED
chr1	17253267	17253417	-1.28	-3.97	0.0005092	0.004379	YOUNG-BIASED
chr1	17274097	17274247	-1.08	-3.62	0.00126	0.008282	YOUNG-BIASED
chr1	17287261	17287411	-0.63	-2.82	0.009205	0.03447	YOUNG-BIASED
chr1	17287583	17287733	-1.66	-5.26	1.757e-05	0.000454	YOUNG-BIASED
chr1	17290069	17290219	-1.47	-3.87	0.0006676	0.005292	YOUNG-BIASED
chr1	17294224	17294374	-1.08	-3.28	0.003003	0.01538	YOUNG-BIASED
chr1	17306203	17306353	-1.11	-3.31	0.002732	0.01437	YOUNG-BIASED
chr1	17313578	17313728	-1.3	-4.96	3.804e-05	0.0007487	YOUNG-BIASED
chr1	17325272	17325422	-1.93	-6.06	2.204e-06	0.0001412	YOUNG-BIASED
chr1	17336214	17336364	-1.89	-6.79	3.52e-07	5.855e-05	YOUNG-BIASED
chr1	17337973	17338123	-1.07	-2.87	0.008179	0.03164	YOUNG-BIASED
chr1	17338379	17338529	-1.52	-4.11	0.0003577	0.003427	YOUNG-BIASED
chr1	17372753	17372903	-4.23	-6.62	5.266e-07	7.053e-05	YOUNG-BIASED
chr1	17386376	17386526	-0.93	-3.65	0.001169	0.007859	YOUNG-BIASED
chr1	17417924	17418074	-1.18	-4.61	9.729e-05	0.001403	YOUNG-BIASED
chr1	17445826	17445976	-1.57	-4.3	0.0002195	0.002443	YOUNG-BIASED
chr1	17454995	17455145	-1.47	-3.3	0.002861	0.01485	YOUNG-BIASED
chr1	17539130	17539280	-0.82	-2.9	0.007511	0.02975	YOUNG-BIASED
chr1	17563663	17563813	-0.65	-2.86	0.008336	0.03208	YOUNG-BIASED
chr1	17566025	17566175	-1.55	-5.93	3.082e-06	0.0001683	YOUNG-BIASED
chr1	17732695	17732845	-1.4	-5.85	3.802e-06	0.0001876	YOUNG-BIASED
chr1	17735985	17736135	-1.18	-2.79	0.009735	0.03589	YOUNG-BIASED
chr1	17738864	17739014	-0.82	-2.75	0.01081	0.03875	YOUNG-BIASED
chr1	17746315	17746465	-1.83	-4.78	6.151e-05	0.001029	YOUNG-BIASED
chr1	17746625	17746775	-1.15	-4.34	0.0001938	0.002243	YOUNG-BIASED
chr1	17750570	17750720	-1.19	-4.01	0.0004674	0.004131	YOUNG-BIASED
chr1	17765041	17765191	-1.1	-3.75	0.0009016	0.006529	YOUNG-BIASED
chr1	17804049	17804199	-1.05	-4.64	8.869e-05	0.001318	YOUNG-BIASED
chr1	17820897	17821047	-0.96	-4.87	4.867e-05	0.00088	YOUNG-BIASED
chr1	17829204	17829354	-0.64	-2.72	0.01162	0.04081	YOUNG-BIASED
chr1	17858248	17858398	-0.76	-2.83	0.008997	0.03391	YOUNG-BIASED
chr1	17866167	17866317	-2.26	-4.83	5.43e-05	0.0009462	YOUNG-BIASED
chr1	17878523	17878673	-0.89	-3.3	0.002806	0.01465	YOUNG-BIASED
chr1	17906831	17906981	-0.85	-2.88	0.007863	0.03075	YOUNG-BIASED
chr1	17914189	17914339	-1.07	-5.14	2.407e-05	0.0005558	YOUNG-BIASED
chr1	17914483	17914633	-1.36	-5.84	3.832e-06	0.0001884	YOUNG-BIASED
chr1	17920615	17920765	-0.73	-2.7	0.01223	0.04234	YOUNG-BIASED
chr1	17932273	17932423	-0.85	-3.41	0.002149	0.0121	YOUNG-BIASED
chr1	17933358	17933508	-0.79	-4.03	0.0004376	0.003943	YOUNG-BIASED
chr1	17988225	17988375	-1.19	-5.64	6.468e-06	0.000251	YOUNG-BIASED
chr1	17998851	17999001	-1.15	-4.76	6.484e-05	0.001066	YOUNG-BIASED
chr1	18017639	18017789	-1.91	-4.75	6.654e-05	0.001085	YOUNG-BIASED
chr1	18069665	18069815	-0.8	-2.85	0.008473	0.03246	YOUNG-BIASED
chr1	18158214	18158364	-1.52	-4.39	0.0001717	0.002068	YOUNG-BIASED
chr1	18201651	18201801	-0.86	-3.33	0.002618	0.01394	YOUNG-BIASED
chr1	18202482	18202632	-1.32	-4.7	7.617e-05	0.001189	YOUNG-BIASED
chr1	18208331	18208481	-1.25	-4.48	0.0001367	0.001769	YOUNG-BIASED
chr1	18217669	18217819	-1	-3.25	0.003247	0.01626	YOUNG-BIASED
chr1	18250189	18250339	-0.95	-2.71	0.01194	0.04161	YOUNG-BIASED
chr1	18251925	18252075	-0.81	-3.18	0.003825	0.01828	YOUNG-BIASED
chr1	18311169	18311319	-0.89	-3.45	0.001933	0.01122	YOUNG-BIASED
chr1	18427060	18427210	-0.94	-3.4	0.002208	0.01234	YOUNG-BIASED
chr1	18561427	18561577	-1.22	-3.33	0.002636	0.01401	YOUNG-BIASED
chr1	18653071	18653221	-1.74	-4.09	0.0003734	0.00353	YOUNG-BIASED
chr1	18671397	18671547	-0.82	-2.81	0.009446	0.03511	YOUNG-BIASED
chr1	18711921	18712071	-1.58	-5.99	2.596e-06	0.0001541	YOUNG-BIASED
chr1	18801427	18801577	-0.74	-2.67	0.01299	0.04424	YOUNG-BIASED
chr1	18902181	18902331	-1.31	-5.5	9.238e-06	0.0003073	YOUNG-BIASED
chr1	18911372	18911522	-1.79	-5.88	3.478e-06	0.000179	YOUNG-BIASED
chr1	18923981	18924131	-0.77	-3.69	0.001068	0.007367	YOUNG-BIASED
chr1	18960087	18960237	-1.22	-3.33	0.002641	0.01403	YOUNG-BIASED
chr1	18969927	18970077	-1.64	-3.96	0.0005285	0.00449	YOUNG-BIASED
chr1	18973157	18973307	-1.65	-4.18	0.0002945	0.002994	YOUNG-BIASED
chr1	18980487	18980637	-1.07	-4.28	0.0002284	0.002513	YOUNG-BIASED
chr1	18984261	18984411	-1.25	-2.88	0.007881	0.03081	YOUNG-BIASED
chr1	19051857	19052007	-1.2	-3.21	0.003527	0.01725	YOUNG-BIASED
chr1	19052037	19052187	-1.2	-3.06	0.005071	0.02241	YOUNG-BIASED
chr1	19110615	19110765	-1.17	-4.95	3.906e-05	0.0007618	YOUNG-BIASED
chr1	19110790	19110940	-0.94	-3.07	0.00501	0.02221	YOUNG-BIASED
chr1	19175831	19175981	-1.03	-3.8	0.0008023	0.006013	YOUNG-BIASED
chr1	19201885	19202035	-1.16	-4.37	0.0001822	0.002153	YOUNG-BIASED
chr1	19210684	19210834	-0.67	-3.21	0.003517	0.01722	YOUNG-BIASED
chr1	19228635	19228785	-1	-3.77	0.0008679	0.006355	YOUNG-BIASED
chr1	19233699	19233849	-0.88	-3.92	0.0005905	0.004855	YOUNG-BIASED
chr1	19239709	19239859	-1.02	-3.59	0.001369	0.008776	YOUNG-BIASED
chr1	19240761	19240911	-1.85	-5.16	2.286e-05	0.0005375	YOUNG-BIASED
chr1	19253086	19253236	-1.01	-3.49	0.001763	0.0105	YOUNG-BIASED
chr1	19265349	19265499	-1.15	-3.63	0.001223	0.008113	YOUNG-BIASED
chr1	19271859	19272009	-0.81	-3.04	0.00542	0.02349	YOUNG-BIASED
chr1	19272040	19272190	-1.37	-6.01	2.473e-06	0.0001501	YOUNG-BIASED
chr1	19276513	19276663	-1.09	-5.27	1.682e-05	0.0004414	YOUNG-BIASED
chr1	19276767	19276917	-0.65	-2.7	0.01195	0.04164	YOUNG-BIASED
chr1	19325965	19326115	-1.73	-4.68	7.906e-05	0.00122	YOUNG-BIASED
chr1	19382227	19382377	-1.08	-3.78	0.000847	0.006246	YOUNG-BIASED
chr1	19422851	19423001	-1.4	-4.23	0.000262	0.002763	YOUNG-BIASED
chr1	19440179	19440329	-1.08	-4.32	0.0002054	0.002335	YOUNG-BIASED
chr1	19466017	19466167	-2.01	-2.88	0.007868	0.03077	YOUNG-BIASED
chr1	19483306	19483456	-1.31	-3.28	0.003014	0.01542	YOUNG-BIASED
chr1	19522276	19522426	-1.76	-4.27	0.000233	0.002549	YOUNG-BIASED
chr1	19567779	19567929	-1.21	-4.36	0.0001867	0.002188	YOUNG-BIASED
chr1	19578015	19578165	-0.76	-2.8	0.009579	0.03547	YOUNG-BIASED
chr1	19578353	19578503	-0.98	-2.87	0.008	0.03114	YOUNG-BIASED
chr1	19584055	19584205	-1.51	-5.62	6.77e-06	0.0002574	YOUNG-BIASED
chr1	19584241	19584391	-1.13	-3.18	0.003815	0.01825	YOUNG-BIASED
chr1	19615613	19615763	-1.16	-3.52	0.001641	0.009982	YOUNG-BIASED
chr1	19638529	19638679	-1.06	-3.6	0.001344	0.008664	YOUNG-BIASED
chr1	19668145	19668295	-0.96	-3.84	0.0007175	0.005565	YOUNG-BIASED
chr1	19670985	19671135	-1.33	-4.8	5.818e-05	0.0009913	YOUNG-BIASED
chr1	19687806	19687956	-0.89	-3.69	0.001052	0.007289	YOUNG-BIASED
chr1	19690284	19690434	-0.98	-3.01	0.00575	0.02452	YOUNG-BIASED
chr1	19692443	19692593	-1.03	-2.84	0.008685	0.03305	YOUNG-BIASED
chr1	19702181	19702331	-1.58	-6.07	2.164e-06	0.0001399	YOUNG-BIASED
chr1	19710751	19710901	-1.18	-4.65	8.725e-05	0.001303	YOUNG-BIASED
chr1	19717346	19717496	-1.06	-3.98	0.0005014	0.004334	YOUNG-BIASED
chr1	19717704	19717854	-1.35	-5.12	2.512e-05	0.0005723	YOUNG-BIASED
chr1	19727411	19727561	-1.69	-4.34	0.0001955	0.002257	YOUNG-BIASED
chr1	19728021	19728171	-0.85	-2.91	0.007282	0.0291	YOUNG-BIASED
chr1	19732471	19732621	-0.79	-3.27	0.003025	0.01546	YOUNG-BIASED
chr1	19741001	19741151	-1.69	-4.29	0.0002255	0.00249	YOUNG-BIASED
chr1	19741318	19741468	-1.5	-3.68	0.00107	0.007376	YOUNG-BIASED
chr1	19743709	19743859	-2.38	-6.77	3.626e-07	5.922e-05	YOUNG-BIASED
chr1	19756671	19756821	-1.5	-4.06	0.000402	0.003715	YOUNG-BIASED
chr1	19761781	19761931	-1.84	-4.59	0.0001018	0.001448	YOUNG-BIASED
chr1	19767663	19767813	-1.13	-3.35	0.002488	0.01344	YOUNG-BIASED
chr1	19777328	19777478	-1.84	-3.88	0.0006515	0.0052	YOUNG-BIASED
chr1	19811708	19811858	-1.02	-3.47	0.001843	0.01085	YOUNG-BIASED
chr1	19811980	19812130	-0.82	-2.81	0.009439	0.03509	YOUNG-BIASED
chr1	19814266	19814416	-1.17	-4.29	0.0002226	0.002468	YOUNG-BIASED
chr1	19821619	19821769	-2.61	-6.37	9.978e-07	9.556e-05	YOUNG-BIASED
chr1	19831854	19832004	-2.23	-5.07	2.905e-05	0.0006283	YOUNG-BIASED
chr1	19856367	19856517	-1.17	-3.45	0.001941	0.01125	YOUNG-BIASED
chr1	19890089	19890239	-1.96	-4.97	3.716e-05	0.0007374	YOUNG-BIASED
chr1	19890293	19890443	-0.9	-2.96	0.006461	0.02668	YOUNG-BIASED
chr1	19908840	19908990	-0.78	-2.91	0.007398	0.02943	YOUNG-BIASED
chr1	19933931	19934081	-5.73	-4.44	0.0001506	0.001892	YOUNG-BIASED
chr1	19946311	19946461	-1.67	-5.39	1.244e-05	0.0003667	YOUNG-BIASED
chr1	19967289	19967439	-1.42	-4.87	4.878e-05	0.0008814	YOUNG-BIASED
chr1	19971229	19971379	-1.72	-4.53	0.0001189	0.00161	YOUNG-BIASED
chr1	19977577	19977727	-1.27	-4.59	0.0001005	0.001435	YOUNG-BIASED
chr1	19977729	19977879	-1.38	-4.89	4.58e-05	0.0008451	YOUNG-BIASED
chr1	19980263	19980413	-0.93	-3.48	0.001819	0.01074	YOUNG-BIASED
chr1	19986326	19986476	-1.28	-4.77	6.341e-05	0.00105	YOUNG-BIASED
chr1	19988323	19988473	-1.98	-5.81	4.227e-06	0.0001989	YOUNG-BIASED
chr1	20030935	20031085	-0.85	-4.28	0.0002285	0.002514	YOUNG-BIASED
chr1	20062094	20062244	-1.46	-4.65	8.701e-05	0.001301	YOUNG-BIASED
chr1	20064435	20064585	-1.24	-3.52	0.001629	0.009929	YOUNG-BIASED
chr1	20098657	20098807	-1.02	-4.21	0.0002739	0.002849	YOUNG-BIASED
chr1	20171500	20171650	-1.17	-2.73	0.01134	0.04009	YOUNG-BIASED
chr1	20209019	20209169	-0.91	-2.92	0.007104	0.02858	YOUNG-BIASED
chr1	20244586	20244736	-1.03	-4.34	0.0001931	0.002238	YOUNG-BIASED
chr1	20427502	20427652	-1	-4.79	6.056e-05	0.001019	YOUNG-BIASED
chr1	20479049	20479199	-0.71	-3.07	0.004937	0.02197	YOUNG-BIASED
chr1	20512290	20512440	-0.65	-2.64	0.01389	0.04643	YOUNG-BIASED
chr1	20521292	20521442	-2.31	-5.33	1.454e-05	0.0004032	YOUNG-BIASED
chr1	20539455	20539605	-0.85	-3.83	0.0007303	0.005635	YOUNG-BIASED
chr1	20546603	20546753	-1.33	-2.97	0.006371	0.02641	YOUNG-BIASED
chr1	20550831	20550981	-2.91	-4.67	8.305e-05	0.001262	YOUNG-BIASED
chr1	20591890	20592040	-1.07	-3.49	0.001771	0.01054	YOUNG-BIASED
chr1	20666566	20666716	-0.84	-3.25	0.003228	0.01619	YOUNG-BIASED
chr1	20669745	20669895	-1.59	-4.74	6.817e-05	0.001103	YOUNG-BIASED
chr1	20670093	20670243	-1.26	-3.35	0.002489	0.01344	YOUNG-BIASED
chr1	20686079	20686229	-1.14	-3.74	0.0009369	0.006708	YOUNG-BIASED
chr1	20688308	20688458	-1.12	-3.73	0.0009585	0.006818	YOUNG-BIASED
chr1	20693313	20693463	-1.65	-3.82	0.0007475	0.005727	YOUNG-BIASED
chr1	20698007	20698157	-1.15	-2.76	0.01048	0.03788	YOUNG-BIASED
chr1	20703445	20703595	-0.65	-3.05	0.005272	0.02304	YOUNG-BIASED
chr1	20731035	20731185	-1.09	-3.22	0.003457	0.01701	YOUNG-BIASED
chr1	20767368	20767518	-1.04	-3.99	0.0004823	0.004219	YOUNG-BIASED
chr1	20796815	20796965	-1.48	-4.32	0.0002031	0.002317	YOUNG-BIASED
chr1	20799853	20800003	-1.22	-3.51	0.00166	0.01007	YOUNG-BIASED
chr1	20804389	20804539	-1.87	-4.49	0.0001323	0.001731	YOUNG-BIASED
chr1	20809115	20809265	-4.06	-6.1	1.981e-06	0.0001338	YOUNG-BIASED
chr1	20812142	20812292	-1.2	-2.97	0.006411	0.02653	YOUNG-BIASED
chr1	20848943	20849093	-0.77	-3.33	0.002609	0.01391	YOUNG-BIASED
chr1	20865701	20865851	-2.45	-3.48	0.001805	0.01069	YOUNG-BIASED
chr1	20878987	20879137	-1.2	-4.27	0.000235	0.002563	YOUNG-BIASED
chr1	20880281	20880431	-1.44	-4.64	8.78e-05	0.00131	YOUNG-BIASED
chr1	20880823	20880973	-1.03	-3.13	0.004311	0.01993	YOUNG-BIASED
chr1	20901685	20901835	-0.81	-3.41	0.002166	0.01217	YOUNG-BIASED
chr1	20901989	20902139	-0.68	-2.9	0.007581	0.02995	YOUNG-BIASED
chr1	20960278	20960428	-1.01	-3.14	0.004222	0.01963	YOUNG-BIASED
chr1	20966550	20966700	-0.78	-2.65	0.01361	0.04576	YOUNG-BIASED
chr1	21011630	21011780	-1.38	-3.38	0.002338	0.01285	YOUNG-BIASED
chr1	21023059	21023209	-1.16	-4.11	0.0003535	0.0034	YOUNG-BIASED
chr1	21044351	21044501	-1.6	-3.66	0.001152	0.007776	YOUNG-BIASED
chr1	21059137	21059287	-0.72	-2.85	0.008402	0.03226	YOUNG-BIASED
chr1	21111501	21111651	6.81	9.21	1.263e-09	4.062e-06	OLD-BIASED
chr1	21118983	21119133	-1.31	-2.96	0.00656	0.02698	YOUNG-BIASED
chr1	21209357	21209507	5.26	4.68	8.074e-05	0.001237	OLD-BIASED
chr1	21287095	21287245	5.79	5.24	1.841e-05	0.0004676	OLD-BIASED
chr1	21308793	21308943	-3.63	-4.23	0.0002604	0.00275	YOUNG-BIASED
chr1	21343018	21343168	2.4	3.03	0.005571	0.02397	OLD-BIASED
chr1	21349023	21349173	-2.72	-5.26	1.727e-05	0.000449	YOUNG-BIASED
chr1	21372003	21372153	-5.1	-4.56	0.0001091	0.001518	YOUNG-BIASED
chr1	21387111	21387261	1.69	3.56	0.001476	0.009267	OLD-BIASED
chr1	21395860	21396010	-2.07	-4.59	0.0001011	0.001441	YOUNG-BIASED
chr1	21399491	21399641	-1.02	-2.82	0.009025	0.03398	YOUNG-BIASED
chr1	21408818	21408968	5.97	5.35	1.381e-05	0.0003905	OLD-BIASED
chr1	21409853	21410003	3.92	4.74	6.767e-05	0.001097	OLD-BIASED
chr1	21417111	21417261	-2.43	-2.68	0.01256	0.04316	YOUNG-BIASED
chr1	21441661	21441811	-1.87	-3.09	0.00475	0.02137	YOUNG-BIASED
chr1	21502077	21502227	-1.01	-3.04	0.00537	0.02334	YOUNG-BIASED
chr1	21503064	21503214	-0.9	-2.89	0.007714	0.03033	YOUNG-BIASED
chr1	21521779	21521929	-1.17	-4.39	0.0001699	0.002054	YOUNG-BIASED
chr1	21543499	21543649	-0.8	-3.77	0.0008704	0.006369	YOUNG-BIASED
chr1	21558697	21558847	-1.59	-4.69	7.86e-05	0.001215	YOUNG-BIASED
chr1	21561487	21561637	-1.04	-2.73	0.01116	0.03964	YOUNG-BIASED
chr1	21564413	21564563	-1.26	-4.15	0.0003218	0.003184	YOUNG-BIASED
chr1	21565870	21566020	-0.96	-2.93	0.007052	0.02843	YOUNG-BIASED
chr1	21587801	21587951	-1.41	-4.46	0.0001432	0.001826	YOUNG-BIASED
chr1	21588202	21588352	-0.85	-2.84	0.008731	0.03317	YOUNG-BIASED
chr1	21596195	21596345	-1.5	-5.51	9.086e-06	0.0003043	YOUNG-BIASED
chr1	21596519	21596669	-1.31	-5.33	1.438e-05	0.0004004	YOUNG-BIASED
chr1	21607717	21607867	-0.84	-3	0.005862	0.02488	YOUNG-BIASED
chr1	21611123	21611273	-1.04	-3.26	0.003147	0.0159	YOUNG-BIASED
chr1	21616581	21616731	-0.86	-2.65	0.01364	0.04582	YOUNG-BIASED
chr1	21629326	21629476	-1.07	-3.41	0.002131	0.01203	YOUNG-BIASED
chr1	21635409	21635559	-0.97	-4.78	6.179e-05	0.001032	YOUNG-BIASED
chr1	21636843	21636993	-1	-3.15	0.004156	0.01941	YOUNG-BIASED
chr1	21638037	21638187	5.58	5.48	9.892e-06	0.0003203	OLD-BIASED
chr1	21645551	21645701	2.79	4.21	0.0002719	0.002835	OLD-BIASED
chr1	21649813	21649963	-1.15	-3.76	0.0008874	0.006455	YOUNG-BIASED
chr1	21652329	21652479	-0.66	-2.98	0.006164	0.02579	YOUNG-BIASED
chr1	21656022	21656172	-0.99	-2.81	0.009391	0.03496	YOUNG-BIASED
chr1	21695197	21695347	-0.75	-3.78	0.0008394	0.006208	YOUNG-BIASED
chr1	21697196	21697346	-0.96	-3.97	0.0005143	0.00441	YOUNG-BIASED
chr1	21766803	21766953	-1.08	-3.89	0.0006386	0.005128	YOUNG-BIASED
chr1	21818617	21818767	-1.5	-5.81	4.23e-06	0.0001989	YOUNG-BIASED
chr1	21835887	21836037	-1.35	-2.87	0.008091	0.0314	YOUNG-BIASED
chr1	21851585	21851735	-0.75	-3.18	0.003824	0.01828	YOUNG-BIASED
chr1	21861263	21861413	-1.2	-3.91	0.0005995	0.004907	YOUNG-BIASED
chr1	21864518	21864668	-1.13	-5.89	3.436e-06	0.0001779	YOUNG-BIASED
chr1	21864669	21864819	-0.73	-2.69	0.01243	0.04284	YOUNG-BIASED
chr1	21868395	21868545	-1.01	-3.6	0.001343	0.008659	YOUNG-BIASED
chr1	21873051	21873201	-0.71	-2.68	0.01276	0.04364	YOUNG-BIASED
chr1	21879751	21879901	-1.99	-5.49	9.665e-06	0.0003159	YOUNG-BIASED
chr1	21880007	21880157	-0.71	-2.64	0.01403	0.04678	YOUNG-BIASED
chr1	21886567	21886717	-1.37	-3.3	0.002826	0.01472	YOUNG-BIASED
chr1	21901055	21901205	-1.37	-5.73	5.085e-06	0.0002194	YOUNG-BIASED
chr1	21901323	21901473	-1.27	-4.55	0.0001137	0.001562	YOUNG-BIASED
chr1	21911625	21911775	-1.55	-6.46	7.947e-07	8.561e-05	YOUNG-BIASED
chr1	21913261	21913411	-1.82	-6.37	1.002e-06	9.579e-05	YOUNG-BIASED
chr1	21913613	21913763	-1.49	-4.94	4.017e-05	0.0007755	YOUNG-BIASED
chr1	21934332	21934482	-1.43	-3.62	0.001278	0.008367	YOUNG-BIASED
chr1	21958625	21958775	-1.29	-5.31	1.549e-05	0.00042	YOUNG-BIASED
chr1	21978441	21978591	-2.12	-3.82	0.0007584	0.005785	YOUNG-BIASED
chr1	21986046	21986196	-1.42	-4.55	0.0001129	0.001554	YOUNG-BIASED
chr1	21990165	21990315	-1.53	-5.66	6.094e-06	0.0002421	YOUNG-BIASED
chr1	21995817	21995967	-1.69	-3.99	0.0004908	0.004271	YOUNG-BIASED
chr1	22002581	22002731	-1	-3.63	0.001232	0.008153	YOUNG-BIASED
chr1	22048173	22048323	-3.11	-2.7	0.01202	0.04181	YOUNG-BIASED
chr1	22091451	22091601	-2.31	-3.03	0.005536	0.02386	YOUNG-BIASED
chr1	22142604	22142754	-0.82	-3.02	0.005596	0.02404	YOUNG-BIASED
chr1	22145235	22145385	-1.8	-4.98	3.603e-05	0.0007237	YOUNG-BIASED
chr1	22184448	22184598	-1.55	-5.4	1.209e-05	0.0003605	YOUNG-BIASED
chr1	22192647	22192797	-1.24	-4.46	0.0001422	0.001817	YOUNG-BIASED
chr1	22196397	22196547	-1.01	-2.82	0.009153	0.03432	YOUNG-BIASED
chr1	22201541	22201691	-1.3	-6.18	1.603e-06	0.0001209	YOUNG-BIASED
chr1	22236951	22237101	-1	-3.01	0.005736	0.02448	YOUNG-BIASED
chr1	22238888	22239038	-0.85	-2.71	0.01187	0.04144	YOUNG-BIASED
chr1	22240402	22240552	-1.01	-3.54	0.00155	0.009593	YOUNG-BIASED
chr1	22250284	22250434	-0.98	-3.57	0.00142	0.00901	YOUNG-BIASED
chr1	22254081	22254231	-0.94	-2.86	0.008368	0.03217	YOUNG-BIASED
chr1	22270891	22271041	-0.86	-3.57	0.001423	0.009026	YOUNG-BIASED
chr1	22273487	22273637	-1.09	-3.04	0.00532	0.02319	YOUNG-BIASED
chr1	22349495	22349645	-1.8	-7.81	2.933e-08	1.759e-05	YOUNG-BIASED
chr1	22351763	22351913	-0.83	-3.27	0.003082	0.01567	YOUNG-BIASED
chr1	22366061	22366211	1.68	2.93	0.007078	0.02851	OLD-BIASED
chr1	22379761	22379911	-0.79	-2.99	0.006034	0.0254	YOUNG-BIASED
chr1	22380771	22380921	6.46	5.53	8.68e-06	0.0002963	OLD-BIASED
chr1	22382042	22382192	4.38	5.4	1.208e-05	0.0003604	OLD-BIASED
chr1	22432167	22432317	-2.17	-4.7	7.666e-05	0.001194	YOUNG-BIASED
chr1	22439237	22439387	-2.14	-6.02	2.436e-06	0.000149	YOUNG-BIASED
chr1	22441299	22441449	-0.91	-2.99	0.00605	0.02545	YOUNG-BIASED
chr1	22469027	22469177	-1.11	-2.96	0.006552	0.02695	YOUNG-BIASED
chr1	22480429	22480579	-0.72	-2.63	0.01438	0.04762	YOUNG-BIASED
chr1	22555257	22555407	-0.95	-4	0.0004778	0.004193	YOUNG-BIASED
chr1	22567901	22568051	-1.27	-5.74	5.054e-06	0.0002187	YOUNG-BIASED
chr1	22601722	22601872	-0.79	-2.67	0.01309	0.04448	YOUNG-BIASED
chr1	22616263	22616413	-0.89	-2.66	0.01338	0.04518	YOUNG-BIASED
chr1	22658508	22658658	-0.98	-3.15	0.004082	0.01916	YOUNG-BIASED
chr1	22692111	22692261	2.35	3.64	0.001201	0.008009	OLD-BIASED
chr1	22739521	22739671	-0.98	-3.42	0.002079	0.01182	YOUNG-BIASED
chr1	22755216	22755366	-2.45	-5.38	1.271e-05	0.0003713	YOUNG-BIASED
chr1	22774164	22774314	-0.93	-2.81	0.009295	0.0347	YOUNG-BIASED
chr1	22814550	22814700	-1.24	-3.39	0.002268	0.01258	YOUNG-BIASED
chr1	22835220	22835370	-1.01	-2.95	0.006635	0.0272	YOUNG-BIASED
chr1	22854665	22854815	-0.87	-3.86	0.000678	0.005347	YOUNG-BIASED
chr1	22856337	22856487	-1.16	-4.11	0.0003579	0.003428	YOUNG-BIASED
chr1	22857153	22857303	-1.16	-4.02	0.0004535	0.004045	YOUNG-BIASED
chr1	22858044	22858194	-0.65	-2.96	0.006509	0.02682	YOUNG-BIASED
chr1	22909148	22909298	-1.21	-3.65	0.001181	0.007914	YOUNG-BIASED
chr1	22909414	22909564	-2.24	-6.61	5.498e-07	7.202e-05	YOUNG-BIASED
chr1	22933779	22933929	-1.02	-3.04	0.005381	0.02337	YOUNG-BIASED
chr1	22968576	22968726	-0.76	-3.43	0.002026	0.0116	YOUNG-BIASED
chr1	23016108	23016258	-1.46	-4.19	0.0002904	0.002966	YOUNG-BIASED
chr1	23031031	23031181	-0.68	-2.99	0.006127	0.02568	YOUNG-BIASED
chr1	23077304	23077454	-0.96	-2.97	0.006423	0.02656	YOUNG-BIASED
chr1	23102217	23102367	-0.96	-3.37	0.002397	0.01308	YOUNG-BIASED
chr1	23107327	23107477	-0.88	-3.16	0.004002	0.01889	YOUNG-BIASED
chr1	23119329	23119479	-0.86	-3.61	0.001298	0.008459	YOUNG-BIASED
chr1	23121186	23121336	-1	-3.79	0.0008231	0.006121	YOUNG-BIASED
chr1	23142148	23142298	-1.07	-3.62	0.001258	0.008275	YOUNG-BIASED
chr1	23151039	23151189	-0.76	-2.66	0.01326	0.0449	YOUNG-BIASED
chr1	23152241	23152391	-0.65	-2.98	0.00622	0.02596	YOUNG-BIASED
chr1	23153477	23153627	-1.32	-5.32	1.506e-05	0.0004121	YOUNG-BIASED
chr1	23155477	23155627	-1.48	-4.15	0.000324	0.0032	YOUNG-BIASED
chr1	23168440	23168590	-0.79	-2.61	0.01504	0.04918	YOUNG-BIASED
chr1	23188676	23188826	-1.02	-3.08	0.004839	0.02166	YOUNG-BIASED
chr1	23197067	23197217	-1.01	-4.44	0.0001507	0.001892	YOUNG-BIASED
chr1	23215810	23215960	-1.88	-5.03	3.157e-05	0.0006636	YOUNG-BIASED
chr1	23256879	23257029	-1.13	-3.59	0.001366	0.00876	YOUNG-BIASED
chr1	23295965	23296115	-0.56	-2.86	0.008379	0.0322	YOUNG-BIASED
chr1	23303097	23303247	-1.18	-4.83	5.39e-05	0.0009414	YOUNG-BIASED
chr1	23340409	23340559	-0.83	-2.94	0.006839	0.02781	YOUNG-BIASED
chr1	23346037	23346187	-0.97	-3.31	0.002747	0.01443	YOUNG-BIASED
chr1	23346310	23346460	-0.81	-2.77	0.01018	0.03707	YOUNG-BIASED
chr1	23425339	23425489	-1.09	-4.21	0.0002717	0.002833	YOUNG-BIASED
chr1	23426001	23426151	-6.87	-5.87	3.565e-06	0.0001812	YOUNG-BIASED
chr1	23428742	23428892	-0.91	-3.01	0.005766	0.02457	YOUNG-BIASED
chr1	23448974	23449124	-0.69	-2.67	0.01281	0.04379	YOUNG-BIASED
chr1	23494930	23495080	-1.21	-3.58	0.001401	0.008923	YOUNG-BIASED
chr1	23504299	23504449	-1.26	-4.8	5.889e-05	0.0009992	YOUNG-BIASED
chr1	23505641	23505791	-1.85	-3.42	0.002118	0.01198	YOUNG-BIASED
chr1	23511013	23511163	2.08	3.83	0.0007399	0.005687	OLD-BIASED
chr1	23551573	23551723	-1.54	-4.59	0.0001012	0.001442	YOUNG-BIASED
chr1	23576478	23576628	-3.17	-3.44	0.001976	0.0114	YOUNG-BIASED
chr1	23600103	23600253	-1.41	-2.92	0.007126	0.02864	YOUNG-BIASED
chr1	23610331	23610481	-2.19	-3.03	0.005569	0.02396	YOUNG-BIASED
chr1	23649385	23649535	-3.8	-3.27	0.003036	0.0155	YOUNG-BIASED
chr1	23669186	23669336	-3.15	-3.09	0.004728	0.0213	YOUNG-BIASED
chr1	23672372	23672522	7.01	7.33	9.41e-08	3.111e-05	OLD-BIASED
chr1	23696473	23696623	-2.03	-5.57	7.767e-06	0.0002777	YOUNG-BIASED
chr1	23699843	23699993	2.7	3.1	0.004627	0.02097	OLD-BIASED
chr1	23710455	23710605	-1.04	-3.32	0.002692	0.01422	YOUNG-BIASED
chr1	23720829	23720979	-1.43	-4.6	9.739e-05	0.001404	YOUNG-BIASED
chr1	23721001	23721151	-1.14	-3.9	0.0006217	0.005033	YOUNG-BIASED
chr1	23729957	23730107	-3.19	-4.45	0.000146	0.001851	YOUNG-BIASED
chr1	23744316	23744466	-0.95	-2.84	0.008755	0.03324	YOUNG-BIASED
chr1	23749935	23750085	-0.8	-3	0.005986	0.02526	YOUNG-BIASED
chr1	23750220	23750370	-0.84	-3.14	0.004225	0.01964	YOUNG-BIASED
chr1	23810622	23810772	-1.44	-3.77	0.0008605	0.006318	YOUNG-BIASED
chr1	23812073	23812223	2.96	3.65	0.001181	0.007916	OLD-BIASED
chr1	23823477	23823627	-0.68	-2.81	0.009389	0.03496	YOUNG-BIASED
chr1	23866371	23866521	-0.61	-2.67	0.01301	0.04429	YOUNG-BIASED
chr1	23871350	23871500	-0.89	-3.41	0.002141	0.01207	YOUNG-BIASED
chr1	23884683	23884833	-1	-3.35	0.002495	0.01347	YOUNG-BIASED
chr1	23895168	23895318	-1.69	-4.86	4.929e-05	0.0008879	YOUNG-BIASED
chr1	23903876	23904026	-1.08	-2.87	0.008154	0.03157	YOUNG-BIASED
chr1	23916115	23916265	3.43	4.14	0.0003304	0.003243	OLD-BIASED
chr1	23918171	23918321	-1.48	-3.6	0.001339	0.008641	YOUNG-BIASED
chr1	23961529	23961679	-1.29	-4.49	0.0001315	0.001723	YOUNG-BIASED
chr1	23984239	23984389	-0.99	-3.47	0.001839	0.01083	YOUNG-BIASED
chr1	24018541	24018691	-0.79	-3.15	0.004125	0.01931	YOUNG-BIASED
chr1	24069913	24070063	-1.38	-4.03	0.0004371	0.003939	YOUNG-BIASED
chr1	24070477	24070627	-0.8	-3.16	0.004036	0.019	YOUNG-BIASED
chr1	24071201	24071351	-1.21	-4.33	0.0002	0.002291	YOUNG-BIASED
chr1	24077961	24078111	-1.53	-5.25	1.813e-05	0.0004631	YOUNG-BIASED
chr1	24089964	24090114	-2.79	-3.32	0.002703	0.01426	YOUNG-BIASED
chr1	24104947	24105097	-1.15	-3.29	0.00288	0.01492	YOUNG-BIASED
chr1	24127126	24127276	-1.01	-3.38	0.002339	0.01286	YOUNG-BIASED
chr1	24151488	24151638	-1.01	-3.74	0.000922	0.006632	YOUNG-BIASED
chr1	24152461	24152611	-1.6	-3.66	0.001132	0.007675	YOUNG-BIASED
chr1	24156937	24157087	-1.84	-2.69	0.01245	0.0429	YOUNG-BIASED
chr1	24194705	24194855	-0.93	-2.96	0.006534	0.0269	YOUNG-BIASED
chr1	24229399	24229549	-1.69	-4.59	0.0001013	0.001443	YOUNG-BIASED
chr1	24257858	24258008	-2.18	-3.43	0.002025	0.0116	YOUNG-BIASED
chr1	24281744	24281894	-1.05	-3.85	0.0006986	0.005461	YOUNG-BIASED
chr1	24283688	24283838	-1.43	-3.44	0.001997	0.01148	YOUNG-BIASED
chr1	24304771	24304921	-4.88	-5.24	1.823e-05	0.0004646	YOUNG-BIASED
chr1	24311036	24311186	-1.87	-4.64	8.942e-05	0.001326	YOUNG-BIASED
chr1	24335161	24335311	-3.86	-5.09	2.7e-05	0.0005995	YOUNG-BIASED
chr1	24342001	24342151	-2.76	-2.97	0.006383	0.02644	YOUNG-BIASED
chr1	24342444	24342594	-2.41	-5.01	3.318e-05	0.0006854	YOUNG-BIASED
chr1	24354583	24354733	-3.68	-7.96	2.11e-08	1.517e-05	YOUNG-BIASED
chr1	24378396	24378546	-2.74	-4.45	0.0001449	0.001841	YOUNG-BIASED
chr1	24468237	24468387	-0.92	-3.78	0.0008342	0.00618	YOUNG-BIASED
chr1	24469491	24469641	-0.97	-2.8	0.009563	0.03543	YOUNG-BIASED
chr1	24476775	24476925	-0.73	-2.63	0.01426	0.04732	YOUNG-BIASED
chr1	24478518	24478668	5.37	5.75	4.816e-06	0.0002129	OLD-BIASED
chr1	24513149	24513299	-0.74	-2.91	0.00739	0.02941	YOUNG-BIASED
chr1	24513630	24513780	-1.13	-3.26	0.003108	0.01576	YOUNG-BIASED
chr1	24522371	24522521	-1.25	-3.29	0.002909	0.01503	YOUNG-BIASED
chr1	24525955	24526105	-1.19	-4.51	0.0001259	0.001675	YOUNG-BIASED
chr1	24528588	24528738	-1	-3.39	0.002235	0.01245	YOUNG-BIASED
chr1	24641949	24642099	-1.12	-4.18	0.0002975	0.003015	YOUNG-BIASED
chr1	24645033	24645183	-1.3	-4.51	0.0001235	0.001653	YOUNG-BIASED
chr1	24645435	24645585	-2.57	-5.33	1.448e-05	0.0004022	YOUNG-BIASED
chr1	24646041	24646191	-0.84	-3.68	0.001093	0.007488	YOUNG-BIASED
chr1	24648481	24648631	-0.98	-3.13	0.004365	0.02011	YOUNG-BIASED
chr1	24661809	24661959	-0.76	-2.88	0.007991	0.03112	YOUNG-BIASED
chr1	24691727	24691877	-1.28	-4.8	5.802e-05	0.0009895	YOUNG-BIASED
chr1	24695687	24695837	-1.75	-4.71	7.428e-05	0.00117	YOUNG-BIASED
chr1	24718390	24718540	-1.25	-3.78	0.000839	0.006205	YOUNG-BIASED
chr1	24740097	24740247	-0.77	-3.17	0.00394	0.01868	YOUNG-BIASED
chr1	24754153	24754303	-2.52	-3.82	0.0007652	0.005821	YOUNG-BIASED
chr1	24769843	24769993	-1.42	-4.65	8.572e-05	0.001289	YOUNG-BIASED
chr1	24778399	24778549	-4.01	-4.57	0.0001072	0.0015	YOUNG-BIASED
chr1	24828953	24829103	-1.42	-4.22	0.0002656	0.002788	YOUNG-BIASED
chr1	24867789	24867939	-1.9	-3.34	0.002554	0.01369	YOUNG-BIASED
chr1	24884468	24884618	-1.66	-6.12	1.896e-06	0.0001313	YOUNG-BIASED
chr1	24902815	24902965	-0.73	-2.63	0.0142	0.04718	YOUNG-BIASED
chr1	24913879	24914029	-2.16	-6.86	2.967e-07	5.417e-05	YOUNG-BIASED
chr1	24920155	24920305	-1.43	-3.49	0.001755	0.01047	YOUNG-BIASED
chr1	24961821	24961971	-5.9	-5.62	6.84e-06	0.0002587	YOUNG-BIASED
chr1	24961972	24962122	-6.14	-4.63	9.057e-05	0.001337	YOUNG-BIASED
chr1	24968265	24968415	-0.84	-3.37	0.00238	0.01302	YOUNG-BIASED
chr1	25015161	25015311	-0.76	-2.8	0.009608	0.03555	YOUNG-BIASED
chr1	25025520	25025670	-2.31	-3.19	0.003725	0.01794	YOUNG-BIASED
chr1	25029289	25029439	-0.94	-3.35	0.002504	0.0135	YOUNG-BIASED
chr1	25031169	25031319	-1.19	-3.61	0.001298	0.008459	YOUNG-BIASED
chr1	25051441	25051591	-1.85	-4.34	0.000197	0.002268	YOUNG-BIASED
chr1	25051608	25051758	-1.48	-4.29	0.0002209	0.002455	YOUNG-BIASED
chr1	25057258	25057408	-0.77	-3.24	0.003278	0.01637	YOUNG-BIASED
chr1	25062313	25062463	-0.88	-3.03	0.005453	0.0236	YOUNG-BIASED
chr1	25070343	25070493	-0.84	-2.86	0.0082	0.0317	YOUNG-BIASED
chr1	25071037	25071187	4.77	4.76	6.444e-05	0.001062	OLD-BIASED
chr1	25073249	25073399	1.76	2.8	0.009473	0.03518	OLD-BIASED
chr1	25078697	25078847	-2.28	-5.7	5.503e-06	0.0002291	YOUNG-BIASED
chr1	25080508	25080658	-1.9	-2.97	0.006383	0.02644	YOUNG-BIASED
chr1	25080791	25080941	-1.2	-3.78	0.0008487	0.006256	YOUNG-BIASED
chr1	25091543	25091693	-4.03	-2.89	0.007627	0.03009	YOUNG-BIASED
chr1	25096825	25096975	-4.79	-7.02	1.977e-07	4.489e-05	YOUNG-BIASED
chr1	25097131	25097281	-6.04	-5.7	5.509e-06	0.0002292	YOUNG-BIASED
chr1	25112647	25112797	-4.36	-4.54	0.0001142	0.001566	YOUNG-BIASED
chr1	25120285	25120435	-3.84	-3.21	0.00357	0.0174	YOUNG-BIASED
chr1	25130105	25130255	-2.44	-5.84	3.834e-06	0.0001885	YOUNG-BIASED
chr1	25132144	25132294	-1.63	-4.29	0.0002216	0.00246	YOUNG-BIASED
chr1	25132356	25132506	-2.9	-3.31	0.002744	0.01442	YOUNG-BIASED
chr1	25156573	25156723	-6.58	-6.05	2.282e-06	0.0001439	YOUNG-BIASED
chr1	25157277	25157427	-4.73	-4.84	5.262e-05	0.0009267	YOUNG-BIASED
chr1	25224601	25224751	-1.27	-3.83	0.0007431	0.005704	YOUNG-BIASED
chr1	25237653	25237803	-0.75	-3.05	0.005221	0.02288	YOUNG-BIASED
chr1	25240969	25241119	-1.21	-3.73	0.0009491	0.00677	YOUNG-BIASED
chr1	25246637	25246787	-3.69	-7.95	2.132e-08	1.517e-05	YOUNG-BIASED
chr1	25254353	25254503	-1.64	-4.05	0.0004212	0.003838	YOUNG-BIASED
chr1	25254855	25255005	-0.87	-2.7	0.01222	0.04231	YOUNG-BIASED
chr1	25257788	25257938	-1.14	-2.99	0.006136	0.0257	YOUNG-BIASED
chr1	25258024	25258174	-1.17	-3.29	0.002884	0.01494	YOUNG-BIASED
chr1	25313030	25313180	1.17	2.65	0.01368	0.04593	OLD-BIASED
chr1	25358789	25358939	-1.83	-4.25	0.0002487	0.002665	YOUNG-BIASED
chr1	25387879	25388029	-1.06	-4.5	0.0001271	0.001686	YOUNG-BIASED
chr1	25428135	25428285	-1.24	-4.51	0.0001264	0.001679	YOUNG-BIASED
chr1	25461637	25461787	-1.34	-3.6	0.001314	0.008529	YOUNG-BIASED
chr1	25472731	25472881	-0.91	-3.04	0.005379	0.02336	YOUNG-BIASED
chr1	25531647	25531797	-3.19	-8.14	1.376e-08	1.21e-05	YOUNG-BIASED
chr1	25565717	25565867	4.69	5.4	1.224e-05	0.0003632	OLD-BIASED
chr1	25573633	25573783	-0.83	-2.74	0.01098	0.03919	YOUNG-BIASED
chr1	25656817	25656967	-6.52	-6.13	1.831e-06	0.0001288	YOUNG-BIASED
chr1	25665312	25665462	-0.93	-4.02	0.0004521	0.004036	YOUNG-BIASED
chr1	25808635	25808785	-3.31	-3.66	0.001146	0.007742	YOUNG-BIASED
chr1	25847101	25847251	-1.4	-4.43	0.0001525	0.001907	YOUNG-BIASED
chr1	25848946	25849096	-0.86	-3.31	0.002795	0.0146	YOUNG-BIASED
chr1	25868563	25868713	-1.01	-3.56	0.001466	0.00922	YOUNG-BIASED
chr1	25870506	25870656	-1	-2.9	0.007496	0.02971	YOUNG-BIASED
chr1	25876211	25876361	-1.06	-4.09	0.0003728	0.003526	YOUNG-BIASED
chr1	25877387	25877537	-0.97	-3.99	0.0004891	0.00426	YOUNG-BIASED
chr1	25889167	25889317	-1.45	-4.95	3.937e-05	0.0007658	YOUNG-BIASED
chr1	25899253	25899403	-1.07	-4.81	5.644e-05	0.0009716	YOUNG-BIASED
chr1	25901282	25901432	-0.9	-3.27	0.003045	0.01553	YOUNG-BIASED
chr1	25916877	25917027	-1.94	-6.19	1.569e-06	0.0001195	YOUNG-BIASED
chr1	25935113	25935263	-0.71	-3	0.005919	0.02505	YOUNG-BIASED
chr1	25935379	25935529	-2.26	-4.68	7.983e-05	0.001228	YOUNG-BIASED
chr1	25943455	25943605	-1	-2.98	0.00624	0.02602	YOUNG-BIASED
chr1	25944077	25944227	-1.14	-3.46	0.001894	0.01105	YOUNG-BIASED
chr1	25967658	25967808	-1.28	-3.06	0.005143	0.02264	YOUNG-BIASED
chr1	25983953	25984103	-1.47	-4.83	5.323e-05	0.0009337	YOUNG-BIASED
chr1	25985711	25985861	-1.34	-2.62	0.01461	0.04818	YOUNG-BIASED
chr1	26003295	26003445	-0.76	-2.7	0.01213	0.04209	YOUNG-BIASED
chr1	26031072	26031222	-0.87	-2.69	0.01248	0.04298	YOUNG-BIASED
chr1	26033703	26033853	-0.92	-3.16	0.003981	0.01881	YOUNG-BIASED
chr1	26053409	26053559	3.83	3.9	0.0006154	0.004999	OLD-BIASED
chr1	26054651	26054801	-1.1	-3.35	0.002519	0.01356	YOUNG-BIASED
chr1	26056806	26056956	-1.64	-4.66	8.418e-05	0.001273	YOUNG-BIASED
chr1	26070354	26070504	-0.76	-3.19	0.003749	0.01803	YOUNG-BIASED
chr1	26070573	26070723	-0.94	-3.19	0.003682	0.0178	YOUNG-BIASED
chr1	26081059	26081209	-1.52	-5.4	1.201e-05	0.0003591	YOUNG-BIASED
chr1	26081337	26081487	-1.33	-4.17	0.0003046	0.003065	YOUNG-BIASED
chr1	26090111	26090261	-0.82	-3.36	0.002438	0.01324	YOUNG-BIASED
chr1	26092310	26092460	-0.94	-3.52	0.00162	0.009893	YOUNG-BIASED
chr1	26097470	26097620	-1.1	-4.3	0.0002173	0.002426	YOUNG-BIASED
chr1	26101711	26101861	-1.02	-3.69	0.001055	0.007304	YOUNG-BIASED
chr1	26111303	26111453	-1.13	-3.21	0.003547	0.01732	YOUNG-BIASED
chr1	26123325	26123475	-0.88	-3.6	0.001313	0.008524	YOUNG-BIASED
chr1	26126492	26126642	-1.24	-3.14	0.004215	0.01961	YOUNG-BIASED
chr1	26146553	26146703	-1.06	-3.79	0.0008213	0.006112	YOUNG-BIASED
chr1	26146857	26147007	-1.19	-3.19	0.003741	0.018	YOUNG-BIASED
chr1	26155900	26156050	-1	-2.97	0.006371	0.02641	YOUNG-BIASED
chr1	26163816	26163966	-3.04	-5.48	9.763e-06	0.0003178	YOUNG-BIASED
chr1	26185782	26185932	-1.03	-4.04	0.0004233	0.003851	YOUNG-BIASED
chr1	26186655	26186805	5.98	4.73	6.938e-05	0.001115	OLD-BIASED
chr1	26187975	26188125	-1.05	-4.05	0.0004184	0.00382	YOUNG-BIASED
chr1	26201774	26201924	-0.67	-2.85	0.008557	0.0327	YOUNG-BIASED
chr1	26202215	26202365	-0.97	-3.58	0.001386	0.008852	YOUNG-BIASED
chr1	26219113	26219263	-0.86	-2.74	0.011	0.03922	YOUNG-BIASED
chr1	26219343	26219493	-1.36	-3.43	0.002049	0.01169	YOUNG-BIASED
chr1	26222390	26222540	-1.11	-4.36	0.0001857	0.002179	YOUNG-BIASED
chr1	26232494	26232644	-0.89	-3.07	0.005019	0.02223	YOUNG-BIASED
chr1	26234349	26234499	-0.79	-3.31	0.002775	0.01453	YOUNG-BIASED
chr1	26279454	26279604	-1.25	-3.61	0.001291	0.008425	YOUNG-BIASED
chr1	26314275	26314425	3.04	3.03	0.005533	0.02385	OLD-BIASED
chr1	26329852	26330002	2.65	3.12	0.004396	0.02021	OLD-BIASED
chr1	26331981	26332131	-1.01	-3.04	0.005321	0.02319	YOUNG-BIASED
chr1	26345192	26345342	-0.86	-3.47	0.001828	0.01078	YOUNG-BIASED
chr1	26348071	26348221	-1.67	-5.41	1.188e-05	0.0003568	YOUNG-BIASED
chr1	26372648	26372798	-1.77	-3.91	0.0005989	0.004903	YOUNG-BIASED
chr1	26376315	26376465	-1.2	-2.92	0.007244	0.02898	YOUNG-BIASED
chr1	26391107	26391257	-1	-2.83	0.008907	0.03366	YOUNG-BIASED
chr1	26408105	26408255	1.21	2.76	0.01046	0.03782	OLD-BIASED
chr1	26426566	26426716	-1.24	-2.63	0.01407	0.04688	YOUNG-BIASED
chr1	26426927	26427077	2.84	2.69	0.01224	0.04236	OLD-BIASED
chr1	26431441	26431591	-1.04	-3.97	0.0005122	0.004397	YOUNG-BIASED
chr1	26452813	26452963	-2.89	-3.63	0.001235	0.008165	YOUNG-BIASED
chr1	26481305	26481455	-2.13	-5.6	7.273e-06	0.0002674	YOUNG-BIASED
chr1	26483237	26483387	-1.53	-5.23	1.873e-05	0.0004728	YOUNG-BIASED
chr1	26485407	26485557	-1.72	-5.55	8.1e-06	0.0002845	YOUNG-BIASED
chr1	26485584	26485734	-1.13	-3.38	0.002328	0.01281	YOUNG-BIASED
chr1	26488302	26488452	-1.25	-3.72	0.0009656	0.006852	YOUNG-BIASED
chr1	26490799	26490949	-1.73	-4.72	7.212e-05	0.001146	YOUNG-BIASED
chr1	26496121	26496271	-0.86	-3.52	0.001639	0.009976	YOUNG-BIASED
chr1	26496389	26496539	-1.25	-4.18	0.0002953	0.003	YOUNG-BIASED
chr1	26517035	26517185	-1.11	-3.58	0.001405	0.00894	YOUNG-BIASED
chr1	26527539	26527689	-1.28	-5.1	2.625e-05	0.000589	YOUNG-BIASED
chr1	26551729	26551879	-1.26	-4.4	0.0001652	0.002014	YOUNG-BIASED
chr1	26633034	26633184	-1.17	-4.5	0.0001285	0.001698	YOUNG-BIASED
chr1	26662907	26663057	-1.64	-5.16	2.267e-05	0.0005343	YOUNG-BIASED
chr1	26690629	26690779	-1.03	-3.13	0.00429	0.01986	YOUNG-BIASED
chr1	26691623	26691773	-0.97	-4.37	0.0001784	0.002122	YOUNG-BIASED
chr1	26722891	26723041	-1.6	-6.61	5.495e-07	7.202e-05	YOUNG-BIASED
chr1	26735190	26735340	-1.33	-3.44	0.001976	0.0114	YOUNG-BIASED
chr1	26735599	26735749	-1.9	-5.66	6.141e-06	0.0002434	YOUNG-BIASED
chr1	26735847	26735997	-0.81	-2.82	0.009058	0.03407	YOUNG-BIASED
chr1	26743613	26743763	-1.14	-5.53	8.594e-06	0.0002947	YOUNG-BIASED
chr1	26743880	26744030	-0.96	-3.13	0.004349	0.02005	YOUNG-BIASED
chr1	26866393	26866543	-0.85	-3.15	0.004064	0.0191	YOUNG-BIASED
chr1	26924313	26924463	-2.58	-5.46	1.047e-05	0.000331	YOUNG-BIASED
chr1	27003791	27003941	-3.57	-6.95	2.355e-07	4.876e-05	YOUNG-BIASED
chr1	27003945	27004095	-1.3	-3.95	0.0005465	0.004598	YOUNG-BIASED
chr1	27013361	27013511	-5.36	-5.27	1.719e-05	0.0004477	YOUNG-BIASED
chr1	27017101	27017251	-1.52	-4.27	0.0002325	0.002545	YOUNG-BIASED
chr1	27019257	27019407	-0.67	-2.72	0.01159	0.04074	YOUNG-BIASED
chr1	27023219	27023369	-0.87	-2.63	0.01418	0.04714	YOUNG-BIASED
chr1	27032709	27032859	-1.39	-3.85	0.000697	0.005453	YOUNG-BIASED
chr1	27032955	27033105	-1.17	-4.38	0.0001744	0.00209	YOUNG-BIASED
chr1	27043695	27043845	-2.05	-5.32	1.496e-05	0.0004104	YOUNG-BIASED
chr1	27050126	27050276	-1.19	-3.99	0.0004889	0.00426	YOUNG-BIASED
chr1	27050358	27050508	-1.62	-5.22	1.935e-05	0.0004829	YOUNG-BIASED
chr1	27055257	27055407	-1.66	-4.67	8.118e-05	0.001242	YOUNG-BIASED
chr1	27070779	27070929	-1.08	-3.58	0.001401	0.008922	YOUNG-BIASED
chr1	27079151	27079301	-1.45	-4.56	0.000111	0.001536	YOUNG-BIASED
chr1	27079879	27080029	-1.37	-3.68	0.001086	0.007454	YOUNG-BIASED
chr1	27095274	27095424	-1.42	-4.26	0.00024	0.0026	YOUNG-BIASED
chr1	27098073	27098223	-1.48	-5.61	7.077e-06	0.0002636	YOUNG-BIASED
chr1	27098294	27098444	-1.05	-2.91	0.007402	0.02944	YOUNG-BIASED
chr1	27110812	27110962	-1.1	-3.87	0.0006592	0.005243	YOUNG-BIASED
chr1	27112665	27112815	-0.83	-2.94	0.00684	0.02781	YOUNG-BIASED
chr1	27114549	27114699	-1	-3.72	0.0009803	0.006926	YOUNG-BIASED
chr1	27126229	27126379	-0.76	-2.77	0.0102	0.03713	YOUNG-BIASED
chr1	27136645	27136795	-1.5	-4.43	0.0001553	0.001931	YOUNG-BIASED
chr1	27152775	27152925	-0.59	-2.73	0.01129	0.03997	YOUNG-BIASED
chr1	27154345	27154495	-1.03	-3.88	0.0006545	0.005216	YOUNG-BIASED
chr1	27179683	27179833	-0.92	-3.47	0.001831	0.01079	YOUNG-BIASED
chr1	27184178	27184328	-0.79	-2.74	0.01111	0.0395	YOUNG-BIASED
chr1	27204501	27204651	-1	-3.88	0.0006518	0.005201	YOUNG-BIASED
chr1	27216807	27216957	-1.57	-5.02	3.269e-05	0.000679	YOUNG-BIASED
chr1	27226814	27226964	-0.63	-2.63	0.01409	0.04693	YOUNG-BIASED
chr1	27236969	27237119	-1.09	-2.83	0.008931	0.03372	YOUNG-BIASED
chr1	27248434	27248584	-1.08	-3.8	0.0007879	0.005938	YOUNG-BIASED
chr1	27293425	27293575	-1.1	-4.44	0.0001492	0.001878	YOUNG-BIASED
chr1	27303337	27303487	-1.52	-2.99	0.006047	0.02544	YOUNG-BIASED
chr1	27320557	27320707	-1.74	-4.81	5.624e-05	0.000969	YOUNG-BIASED
chr1	27321491	27321641	-1.02	-3.71	0.001011	0.007077	YOUNG-BIASED
chr1	27324265	27324415	-0.93	-3.88	0.0006506	0.005195	YOUNG-BIASED
chr1	27326776	27326926	-0.78	-2.76	0.01043	0.03774	YOUNG-BIASED
chr1	27331240	27331390	-1.36	-4.61	9.598e-05	0.00139	YOUNG-BIASED
chr1	27348183	27348333	-1.17	-3.91	0.0005974	0.004895	YOUNG-BIASED
chr1	27358285	27358435	-1.69	-6.29	1.211e-06	0.0001047	YOUNG-BIASED
chr1	27371300	27371450	-0.8	-3.54	0.001567	0.009667	YOUNG-BIASED
chr1	27372386	27372536	-1.28	-4.66	8.522e-05	0.001284	YOUNG-BIASED
chr1	27384304	27384454	-0.93	-2.87	0.008172	0.03162	YOUNG-BIASED
chr1	27397386	27397536	-1.07	-4.27	0.000237	0.002577	YOUNG-BIASED
chr1	27423918	27424068	-0.73	-3.37	0.0024	0.01309	YOUNG-BIASED
chr1	27425831	27425981	-0.91	-3.47	0.001859	0.01091	YOUNG-BIASED
chr1	27469916	27470066	-0.64	-2.69	0.01235	0.04265	YOUNG-BIASED
chr1	27524533	27524683	-1.7	-5.26	1.737e-05	0.0004507	YOUNG-BIASED
chr1	27545353	27545503	1.91	3.03	0.005486	0.0237	OLD-BIASED
chr1	27610957	27611107	-2.76	-5.97	2.734e-06	0.0001585	YOUNG-BIASED
chr1	27617444	27617594	-1.71	-5.3	1.558e-05	0.0004214	YOUNG-BIASED
chr1	27618533	27618683	-2.44	-5.41	1.187e-05	0.0003565	YOUNG-BIASED
chr1	27618701	27618851	-1.77	-4.38	0.0001748	0.002094	YOUNG-BIASED
chr1	27623264	27623414	-1.14	-4.86	5.037e-05	0.0009002	YOUNG-BIASED
chr1	27623439	27623589	-1	-4.17	0.000303	0.003054	YOUNG-BIASED
chr1	27626479	27626629	-1.14	-5.29	1.618e-05	0.0004313	YOUNG-BIASED
chr1	27648866	27649016	-1.05	-3.95	0.0005416	0.00457	YOUNG-BIASED
chr1	27659360	27659510	-1.57	-5.86	3.655e-06	0.0001834	YOUNG-BIASED
chr1	27676959	27677109	-1.38	-4.54	0.0001168	0.00159	YOUNG-BIASED
chr1	27692870	27693020	-1.24	-3.56	0.001477	0.00927	YOUNG-BIASED
chr1	27702654	27702804	-1.6	-5.08	2.809e-05	0.0006152	YOUNG-BIASED
chr1	27715047	27715197	-1.07	-3.87	0.0006591	0.005243	YOUNG-BIASED
chr1	27718902	27719052	-1.22	-4.09	0.0003782	0.003561	YOUNG-BIASED
chr1	27719497	27719647	-1.13	-4.27	0.0002334	0.002552	YOUNG-BIASED
chr1	27721865	27722015	-1.53	-5.52	8.906e-06	0.0003008	YOUNG-BIASED
chr1	27722957	27723107	-1.61	-5.38	1.286e-05	0.0003735	YOUNG-BIASED
chr1	27726093	27726243	-1.52	-5.24	1.841e-05	0.0004676	YOUNG-BIASED
chr1	27729231	27729381	-0.68	-2.69	0.0125	0.04301	YOUNG-BIASED
chr1	27731009	27731159	-1.45	-4.51	0.000124	0.001657	YOUNG-BIASED
chr1	27757067	27757217	5.03	4.57	0.0001065	0.001492	OLD-BIASED
chr1	27758025	27758175	-1.29	-6.14	1.814e-06	0.0001283	YOUNG-BIASED
chr1	27759275	27759425	5.7	5.22	1.93e-05	0.0004823	OLD-BIASED
chr1	27762726	27762876	3.89	3.8	0.0008053	0.006028	OLD-BIASED
chr1	27763283	27763433	-4.05	-5.92	3.121e-06	0.0001694	YOUNG-BIASED
chr1	27764121	27764271	-7.81	-7.28	1.053e-07	3.271e-05	YOUNG-BIASED
chr1	27781730	27781880	-1.14	-3.12	0.004374	0.02014	YOUNG-BIASED
chr1	27815816	27815966	2.13	3.23	0.003397	0.01679	OLD-BIASED
chr1	27818099	27818249	5.28	5.28	1.647e-05	0.0004358	OLD-BIASED
chr1	27834819	27834969	-0.9	-3.16	0.004021	0.01896	YOUNG-BIASED
chr1	27836209	27836359	-0.79	-3.11	0.004565	0.02077	YOUNG-BIASED
chr1	27845643	27845793	-0.66	-2.61	0.01495	0.04897	YOUNG-BIASED
chr1	27847500	27847650	-0.97	-3.02	0.005644	0.02419	YOUNG-BIASED
chr1	27849298	27849448	-0.99	-3.84	0.0007206	0.005582	YOUNG-BIASED
chr1	27854103	27854253	-1.41	-4.08	0.0003877	0.003622	YOUNG-BIASED
chr1	27863100	27863250	-0.63	-2.7	0.01211	0.04203	YOUNG-BIASED
chr1	27863371	27863521	-0.98	-4.13	0.0003383	0.003297	YOUNG-BIASED
chr1	27869207	27869357	-0.99	-3.68	0.001072	0.007385	YOUNG-BIASED
chr1	27871739	27871889	-0.87	-3.3	0.002809	0.01466	YOUNG-BIASED
chr1	27872462	27872612	-1.39	-4.39	0.0001709	0.002061	YOUNG-BIASED
chr1	27881815	27881965	-0.75	-3.66	0.001126	0.007649	YOUNG-BIASED
chr1	27883196	27883346	-1.06	-3.52	0.00161	0.009849	YOUNG-BIASED
chr1	27884295	27884445	-0.85	-3.24	0.003271	0.01634	YOUNG-BIASED
chr1	27895308	27895458	-1.3	-4.66	8.357e-05	0.001267	YOUNG-BIASED
chr1	27897209	27897359	-0.88	-3.34	0.002537	0.01363	YOUNG-BIASED
chr1	27916261	27916411	-1.5	-4.42	0.0001587	0.001959	YOUNG-BIASED
chr1	27919493	27919643	-1.28	-4.01	0.0004565	0.004064	YOUNG-BIASED
chr1	27928779	27928929	-1.08	-3.66	0.001131	0.007674	YOUNG-BIASED
chr1	27929170	27929320	-1.06	-2.94	0.006853	0.02785	YOUNG-BIASED
chr1	27941601	27941751	-0.97	-3.82	0.0007532	0.005758	YOUNG-BIASED
chr1	27960641	27960791	-0.98	-2.96	0.006553	0.02695	YOUNG-BIASED
chr1	27970389	27970539	-0.62	-2.62	0.01466	0.0483	YOUNG-BIASED
chr1	27975255	27975405	-1.17	-3.94	0.0005591	0.004673	YOUNG-BIASED
chr1	27986263	27986413	-1.14	-3.84	0.000725	0.005607	YOUNG-BIASED
chr1	27995915	27996065	-0.69	-3.78	0.0008478	0.006251	YOUNG-BIASED
chr1	27998763	27998913	-0.82	-3.05	0.005187	0.02278	YOUNG-BIASED
chr1	27998969	27999119	-1.13	-4.84	5.269e-05	0.0009275	YOUNG-BIASED
chr1	28078843	28078993	-2.62	-5.83	3.92e-06	0.0001908	YOUNG-BIASED
chr1	28086969	28087119	-1.56	-4.63	9.063e-05	0.001338	YOUNG-BIASED
chr1	28114569	28114719	-2.77	-3.06	0.005115	0.02255	YOUNG-BIASED
chr1	28116159	28116309	-1.57	-3.46	0.001877	0.01099	YOUNG-BIASED
chr1	28143943	28144093	-0.91	-3.07	0.005	0.02218	YOUNG-BIASED
chr1	28298463	28298613	-1.48	-5.47	1.004e-05	0.0003231	YOUNG-BIASED
chr1	28306249	28306399	-2.71	-5.63	6.684e-06	0.0002557	YOUNG-BIASED
chr1	28306962	28307112	-3.43	-3.43	0.002048	0.01169	YOUNG-BIASED
chr1	28319411	28319561	-4.73	-4.17	0.0003072	0.003082	YOUNG-BIASED
chr1	28487413	28487563	-0.83	-3.18	0.003847	0.01836	YOUNG-BIASED
chr1	28535475	28535625	-1.2	-3.17	0.003863	0.01841	YOUNG-BIASED
chr1	28559876	28560026	4.56	5.42	1.153e-05	0.0003506	OLD-BIASED
chr1	28570210	28570360	4.14	4	0.0004779	0.004194	OLD-BIASED
chr1	28672963	28673113	-2.6	-2.94	0.006768	0.0276	YOUNG-BIASED
chr1	28686257	28686407	-1.42	-6.04	2.317e-06	0.0001448	YOUNG-BIASED
chr1	28692639	28692789	-2.76	-3.48	0.001818	0.01074	YOUNG-BIASED
chr1	28696554	28696704	-0.95	-3.62	0.00126	0.008284	YOUNG-BIASED
chr1	28736290	28736440	-4.75	-6.58	5.849e-07	7.416e-05	YOUNG-BIASED
chr1	28736495	28736645	6.38	6.02	2.408e-06	0.0001481	OLD-BIASED
chr1	28743463	28743613	-5.39	-4.48	0.0001345	0.001751	YOUNG-BIASED
chr1	28763899	28764049	2.13	2.8	0.009516	0.0353	OLD-BIASED
chr1	28764943	28765093	-1.53	-2.91	0.007308	0.02917	YOUNG-BIASED
chr1	28774355	28774505	-2.36	-3.51	0.001676	0.01013	YOUNG-BIASED
chr1	28785261	28785411	-1.54	-2.69	0.01226	0.04241	YOUNG-BIASED
chr1	28827717	28827867	-1.54	-3.24	0.003306	0.01647	YOUNG-BIASED
chr1	28832793	28832943	2.28	3.32	0.002671	0.01414	OLD-BIASED
chr1	28844794	28844944	-0.79	-2.79	0.009813	0.0361	YOUNG-BIASED
chr1	28864604	28864754	-1.08	-3.15	0.004088	0.01918	YOUNG-BIASED
chr1	28879599	28879749	-0.82	-2.95	0.006697	0.02739	YOUNG-BIASED
chr1	28908080	28908230	-0.77	-2.77	0.01016	0.03702	YOUNG-BIASED
chr1	28916783	28916933	-1.03	-2.74	0.0111	0.03949	YOUNG-BIASED
chr1	28918777	28918927	-0.75	-2.83	0.008993	0.0339	YOUNG-BIASED
chr1	28929746	28929896	-2.76	-4.41	0.000162	0.001987	YOUNG-BIASED
chr1	28974262	28974412	2.2	3.15	0.004082	0.01916	OLD-BIASED
chr1	28980524	28980674	1.57	2.67	0.01291	0.04403	OLD-BIASED
chr1	28995536	28995686	-2	-4.6	9.873e-05	0.001418	YOUNG-BIASED
chr1	29002251	29002401	-2.11	-4.14	0.0003327	0.003258	YOUNG-BIASED
chr1	29083523	29083673	-1.74	-4.43	0.0001535	0.001916	YOUNG-BIASED
chr1	29111710	29111860	-1.13	-4.64	8.806e-05	0.001312	YOUNG-BIASED
chr1	29157489	29157639	-0.88	-3.02	0.005597	0.02405	YOUNG-BIASED
chr1	29161949	29162099	-1.02	-3.65	0.001164	0.007832	YOUNG-BIASED
chr1	29203651	29203801	-1.18	-5.58	7.613e-06	0.0002746	YOUNG-BIASED
chr1	29208741	29208891	-0.77	-3.2	0.003595	0.01749	YOUNG-BIASED
chr1	29254285	29254435	-1.27	-2.89	0.007631	0.0301	YOUNG-BIASED
chr1	29280813	29280963	-7.63	-7.47	6.619e-08	2.605e-05	YOUNG-BIASED
chr1	29282643	29282793	-1.73	-4.32	0.0002075	0.002351	YOUNG-BIASED
chr1	29356097	29356247	-4.62	-4.52	0.0001231	0.001649	YOUNG-BIASED
chr1	29360488	29360638	-5.43	-6.49	7.348e-07	8.251e-05	YOUNG-BIASED
chr1	29376777	29376927	-2.36	-3.05	0.005296	0.02311	YOUNG-BIASED
chr1	29417808	29417958	-3.74	-3	0.005914	0.02503	YOUNG-BIASED
chr1	29449499	29449649	-0.97	-3.2	0.003637	0.01764	YOUNG-BIASED
chr1	29463056	29463206	-1.2	-4.52	0.0001224	0.001642	YOUNG-BIASED
chr1	29507527	29507677	-0.85	-3.54	0.001546	0.009577	YOUNG-BIASED
chr1	29508228	29508378	-0.82	-2.6	0.01511	0.04934	YOUNG-BIASED
chr1	29524167	29524317	-1.59	-5.82	4.089e-06	0.000195	YOUNG-BIASED
chr1	29529051	29529201	-1.25	-4.31	0.0002122	0.002387	YOUNG-BIASED
chr1	29529443	29529593	-0.74	-2.85	0.008439	0.03237	YOUNG-BIASED
chr1	29557162	29557312	-0.63	-3.2	0.003612	0.01755	YOUNG-BIASED
chr1	29564128	29564278	-1.44	-3.82	0.0007529	0.005757	YOUNG-BIASED
chr1	29572426	29572576	-1.19	-4.31	0.0002128	0.002392	YOUNG-BIASED
chr1	29583625	29583775	-0.98	-2.67	0.01294	0.0441	YOUNG-BIASED
chr1	29586092	29586242	-1.19	-4	0.0004703	0.00415	YOUNG-BIASED
chr1	29651455	29651605	-0.8	-3.11	0.004489	0.02052	YOUNG-BIASED
chr1	29710195	29710345	-1.71	-4.27	0.0002334	0.002551	YOUNG-BIASED
chr1	29779993	29780143	-1.35	-5.42	1.155e-05	0.0003511	YOUNG-BIASED
chr1	29830649	29830799	-1.22	-4.94	4.017e-05	0.0007755	YOUNG-BIASED
chr1	29853501	29853651	-2	-3.91	0.0005935	0.004872	YOUNG-BIASED
chr1	29869251	29869401	-0.84	-2.89	0.007633	0.03011	YOUNG-BIASED
chr1	30155805	30155955	-1.4	-4.54	0.0001161	0.001583	YOUNG-BIASED
chr1	30171125	30171275	-0.82	-2.73	0.01125	0.03988	YOUNG-BIASED
chr1	30181667	30181817	-1.01	-3.29	0.00291	0.01503	YOUNG-BIASED
chr1	30209559	30209709	-1.25	-3.08	0.004839	0.02166	YOUNG-BIASED
chr1	30225135	30225285	-0.69	-2.67	0.01309	0.04446	YOUNG-BIASED
chr1	30348586	30348736	-1.36	-2.61	0.01477	0.04855	YOUNG-BIASED
chr1	30448017	30448167	-0.86	-2.7	0.01199	0.04174	YOUNG-BIASED
chr1	30458485	30458635	2.41	5.7	5.536e-06	0.0002298	OLD-BIASED
chr1	30459713	30459863	-1.64	-3.57	0.001431	0.009062	YOUNG-BIASED
chr1	30459957	30460107	1.04	3.24	0.003282	0.01638	OLD-BIASED
chr1	30463961	30464111	-0.9	-2.72	0.01153	0.04058	YOUNG-BIASED
chr1	30507481	30507631	-0.84	-3.98	0.0005025	0.004341	YOUNG-BIASED
chr1	30556763	30556913	-1.33	-4.94	4.083e-05	0.0007841	YOUNG-BIASED
chr1	30561937	30562087	-1.93	-6.02	2.448e-06	0.0001493	YOUNG-BIASED
chr1	30579062	30579212	-1	-4.15	0.0003173	0.003152	YOUNG-BIASED
chr1	30601975	30602125	-1.03	-2.64	0.01402	0.04675	YOUNG-BIASED
chr1	30639076	30639226	-0.93	-3.08	0.004839	0.02166	YOUNG-BIASED
chr1	30841616	30841766	-0.93	-3.42	0.002096	0.01189	YOUNG-BIASED
chr1	31090469	31090619	-1.65	-2.96	0.006546	0.02693	YOUNG-BIASED
chr1	31125162	31125312	-0.79	-3.36	0.002435	0.01323	YOUNG-BIASED
chr1	31158277	31158427	-1.11	-3.96	0.0005216	0.004452	YOUNG-BIASED
chr1	31159643	31159793	-1.04	-2.87	0.008018	0.03119	YOUNG-BIASED
chr1	31180629	31180779	-1.45	-5.15	2.321e-05	0.0005426	YOUNG-BIASED
chr1	31180938	31181088	-1.17	-4.87	4.85e-05	0.000878	YOUNG-BIASED
chr1	31231729	31231879	-0.96	-2.86	0.008209	0.03172	YOUNG-BIASED
chr1	31241911	31242061	-0.81	-3.2	0.003667	0.01774	YOUNG-BIASED
chr1	31246937	31247087	-0.93	-3.68	0.001093	0.00749	YOUNG-BIASED
chr1	31255661	31255811	-0.88	-2.89	0.007654	0.03016	YOUNG-BIASED
chr1	31259448	31259598	-1.15	-3.01	0.005746	0.02451	YOUNG-BIASED
chr1	31267939	31268089	-1.14	-4.83	5.329e-05	0.0009343	YOUNG-BIASED
chr1	31271169	31271319	-1.42	-3.54	0.001535	0.009526	YOUNG-BIASED
chr1	31280545	31280695	-0.78	-2.81	0.009435	0.03508	YOUNG-BIASED
chr1	31282397	31282547	-1.39	-4	0.0004727	0.004162	YOUNG-BIASED
chr1	31285025	31285175	-0.97	-3.12	0.004395	0.02021	YOUNG-BIASED
chr1	31289371	31289521	-1.24	-4.03	0.0004394	0.003955	YOUNG-BIASED
chr1	31311941	31312091	-1.03	-3.57	0.001439	0.009096	YOUNG-BIASED
chr1	31315533	31315683	-0.89	-3.19	0.003686	0.01781	YOUNG-BIASED
chr1	31325033	31325183	-1.13	-2.83	0.008909	0.03367	YOUNG-BIASED
chr1	31326769	31326919	-1.54	-5.08	2.821e-05	0.0006171	YOUNG-BIASED
chr1	31327091	31327241	-1.31	-4.27	0.0002355	0.002567	YOUNG-BIASED
chr1	31329159	31329309	-0.96	-3.39	0.002243	0.01248	YOUNG-BIASED
chr1	31331790	31331940	-0.75	-2.96	0.006558	0.02697	YOUNG-BIASED
chr1	31352293	31352443	-0.62	-2.75	0.01088	0.03891	YOUNG-BIASED
chr1	31353117	31353267	-0.65	-2.73	0.01138	0.0402	YOUNG-BIASED
chr1	31358825	31358975	-1.09	-3.55	0.001528	0.009494	YOUNG-BIASED
chr1	31384221	31384371	-1.06	-3.88	0.0006468	0.005174	YOUNG-BIASED
chr1	31415458	31415608	-2.37	-6.15	1.743e-06	0.0001259	YOUNG-BIASED
chr1	31415616	31415766	1.46	3.41	0.002162	0.01216	OLD-BIASED
chr1	31449685	31449835	-3.54	-3.52	0.001613	0.009862	YOUNG-BIASED
chr1	31457451	31457601	-2.27	-3.98	0.0005037	0.004348	YOUNG-BIASED
chr1	31469163	31469313	-1.31	-2.87	0.00813	0.0315	YOUNG-BIASED
chr1	31501015	31501165	-6.32	-5.23	1.907e-05	0.0004788	YOUNG-BIASED
chr1	31501253	31501403	-1.21	-4.1	0.0003667	0.003486	YOUNG-BIASED
chr1	31537281	31537431	-2.92	-4.95	3.897e-05	0.0007606	YOUNG-BIASED
chr1	31573883	31574033	-1.57	-3.92	0.0005809	0.004799	YOUNG-BIASED
chr1	31585120	31585270	4.01	3.29	0.002888	0.01495	OLD-BIASED
chr1	31592925	31593075	-0.96	-2.78	0.01005	0.03673	YOUNG-BIASED
chr1	31624315	31624465	1.77	3.2	0.003603	0.01752	OLD-BIASED
chr1	31627845	31627995	-1	-3.06	0.005112	0.02254	YOUNG-BIASED
chr1	31635729	31635879	-1.41	-5.1	2.67e-05	0.0005952	YOUNG-BIASED
chr1	31642683	31642833	3.24	4.48	0.0001344	0.00175	OLD-BIASED
chr1	31654853	31655003	-1.79	-5.35	1.372e-05	0.000389	YOUNG-BIASED
chr1	31655017	31655167	-1.51	-4.54	0.0001162	0.001584	YOUNG-BIASED
chr1	31656909	31657059	-1.41	-4.68	7.943e-05	0.001223	YOUNG-BIASED
chr1	31658623	31658773	-1.56	-4.11	0.0003542	0.003404	YOUNG-BIASED
chr1	31700811	31700961	-0.82	-2.92	0.007257	0.02902	YOUNG-BIASED
chr1	31711975	31712125	-0.9	-3.25	0.003209	0.01612	YOUNG-BIASED
chr1	31807907	31808057	-1.22	-3.4	0.002229	0.01242	YOUNG-BIASED
chr1	31845401	31845551	-0.87	-3.41	0.002163	0.01216	YOUNG-BIASED
chr1	31848879	31849029	6.24	7.22	1.212e-07	3.503e-05	OLD-BIASED
chr1	31895593	31895743	-0.97	-3.6	0.001339	0.008644	YOUNG-BIASED
chr1	31944460	31944610	3.36	3.93	0.0005721	0.004748	OLD-BIASED
chr1	31996943	31997093	-1.5	-3.5	0.001712	0.01029	YOUNG-BIASED
chr1	32002899	32003049	-2.11	-3.39	0.002267	0.01258	YOUNG-BIASED
chr1	32027958	32028108	-1.25	-3.08	0.004898	0.02185	YOUNG-BIASED
chr1	32045679	32045829	-0.95	-2.66	0.01326	0.04489	YOUNG-BIASED
chr1	32045983	32046133	-0.79	-2.68	0.01274	0.0436	YOUNG-BIASED
chr1	32049845	32049995	-1.01	-3.36	0.002451	0.01329	YOUNG-BIASED
chr1	32057562	32057712	-0.9	-3.95	0.0005411	0.004568	YOUNG-BIASED
chr1	32059696	32059846	-0.83	-2.84	0.00871	0.03312	YOUNG-BIASED
chr1	32075310	32075460	-6.7	-6.04	2.321e-06	0.000145	YOUNG-BIASED
chr1	32083522	32083672	-0.99	-2.65	0.01364	0.04583	YOUNG-BIASED
chr1	32116297	32116447	-1.47	-3.8	0.000788	0.005939	YOUNG-BIASED
chr1	32132191	32132341	-1.15	-4.13	0.0003411	0.003316	YOUNG-BIASED
chr1	32135787	32135937	-1.05	-4.56	0.0001083	0.001509	YOUNG-BIASED
chr1	32138863	32139013	-1.37	-5	3.419e-05	0.0006993	YOUNG-BIASED
chr1	32139972	32140122	-1.02	-4.22	0.0002691	0.002814	YOUNG-BIASED
chr1	32157698	32157848	-0.96	-3.66	0.001148	0.007756	YOUNG-BIASED
chr1	32178435	32178585	-2.01	-4.04	0.0004239	0.003855	YOUNG-BIASED
chr1	32180729	32180879	-0.75	-2.62	0.01467	0.0483	YOUNG-BIASED
chr1	32189425	32189575	-1.17	-3.83	0.0007423	0.005699	YOUNG-BIASED
chr1	32191821	32191971	-0.79	-3.12	0.004439	0.02035	YOUNG-BIASED
chr1	32211781	32211931	-1.25	-4.11	0.0003599	0.003441	YOUNG-BIASED
chr1	32214179	32214329	-0.94	-3.92	0.0005813	0.004801	YOUNG-BIASED
chr1	32217838	32217988	-1.07	-4.22	0.0002681	0.002806	YOUNG-BIASED
chr1	32221015	32221165	-1.07	-3.31	0.002757	0.01446	YOUNG-BIASED
chr1	32228580	32228730	-0.84	-2.7	0.01199	0.04174	YOUNG-BIASED
chr1	32230508	32230658	-0.87	-2.7	0.01205	0.0419	YOUNG-BIASED
chr1	32235661	32235811	-1.16	-3.98	0.0004988	0.004319	YOUNG-BIASED
chr1	32237685	32237835	-0.99	-2.83	0.008947	0.03377	YOUNG-BIASED
chr1	32254304	32254454	-1.03	-3.62	0.001254	0.008255	YOUNG-BIASED
chr1	32261683	32261833	-1.07	-4.37	0.0001791	0.002127	YOUNG-BIASED
chr1	32261921	32262071	-0.99	-3.8	0.0007893	0.005945	YOUNG-BIASED
chr1	32298315	32298465	-1.2	-4.42	0.000157	0.001944	YOUNG-BIASED
chr1	32341577	32341727	-5.44	-8	1.889e-08	1.439e-05	YOUNG-BIASED
chr1	32346867	32347017	-1.38	-2.98	0.006284	0.02615	YOUNG-BIASED
chr1	32403398	32403548	-0.82	-2.89	0.007697	0.03028	YOUNG-BIASED
chr1	32405449	32405599	-0.81	-3.02	0.005647	0.0242	YOUNG-BIASED
chr1	32420597	32420747	0.77	2.86	0.008257	0.03186	OLD-BIASED
chr1	32429854	32430004	-0.8	-3.03	0.005549	0.0239	YOUNG-BIASED
chr1	32443512	32443662	-0.84	-3.17	0.003905	0.01855	YOUNG-BIASED
chr1	32479751	32479901	-0.99	-3.24	0.003288	0.0164	YOUNG-BIASED
chr1	32481532	32481682	4.23	3.89	0.0006347	0.005105	OLD-BIASED
chr1	32533823	32533973	5.21	5.16	2.251e-05	0.0005316	OLD-BIASED
chr1	32608237	32608387	-1.76	-5.71	5.47e-06	0.0002283	YOUNG-BIASED
chr1	32608476	32608626	-1.5	-4.73	6.989e-05	0.001121	YOUNG-BIASED
chr1	32617071	32617221	-0.94	-3.32	0.002681	0.01418	YOUNG-BIASED
chr1	32645531	32645681	-1.19	-3.86	0.0006782	0.005348	YOUNG-BIASED
chr1	32665923	32666073	-0.95	-4.06	0.0004108	0.003772	YOUNG-BIASED
chr1	32666141	32666291	-1.4	-4.97	3.739e-05	0.0007405	YOUNG-BIASED
chr1	32671283	32671433	-1.09	-4.22	0.0002697	0.002818	YOUNG-BIASED
chr1	32674495	32674645	-1.24	-3.99	0.0004929	0.004284	YOUNG-BIASED
chr1	32674687	32674837	-0.73	-2.91	0.007422	0.02949	YOUNG-BIASED
chr1	32687899	32688049	-0.84	-3.1	0.004688	0.02117	YOUNG-BIASED
chr1	32706083	32706233	-0.95	-3.28	0.002949	0.01518	YOUNG-BIASED
chr1	32712587	32712737	-1.6	-4.35	0.00019	0.002213	YOUNG-BIASED
chr1	32713979	32714129	-1.29	-3.56	0.001457	0.00918	YOUNG-BIASED
chr1	32715679	32715829	-1.5	-4.3	0.0002161	0.002418	YOUNG-BIASED
chr1	32717779	32717929	-1.08	-3.05	0.005213	0.02286	YOUNG-BIASED
chr1	32732737	32732887	-1.39	-4.11	0.0003546	0.003407	YOUNG-BIASED
chr1	32739155	32739305	-1.16	-3.64	0.001212	0.008063	YOUNG-BIASED
chr1	32739327	32739477	-1.18	-4.14	0.0003252	0.003208	YOUNG-BIASED
chr1	32741107	32741257	-1.31	-4.31	0.0002085	0.002358	YOUNG-BIASED
chr1	32777424	32777574	-1.47	-2.66	0.01323	0.04482	YOUNG-BIASED
chr1	32782278	32782428	-1.38	-4.52	0.0001231	0.001649	YOUNG-BIASED
chr1	32801427	32801577	-1.36	-3.76	0.0008717	0.006375	YOUNG-BIASED
chr1	32811321	32811471	-0.81	-3.7	0.001038	0.007218	YOUNG-BIASED
chr1	32818113	32818263	1.62	4.08	0.0003839	0.003598	OLD-BIASED
chr1	32824869	32825019	4.13	4.78	6.151e-05	0.001029	OLD-BIASED
chr1	32827531	32827681	-1.28	-4.02	0.0004523	0.004037	YOUNG-BIASED
chr1	32828139	32828289	-0.99	-3.51	0.001688	0.01019	YOUNG-BIASED
chr1	32837831	32837981	-1.03	-3.41	0.002137	0.01206	YOUNG-BIASED
chr1	32866572	32866722	-0.81	-3.84	0.0007267	0.005616	YOUNG-BIASED
chr1	32879556	32879706	-1.39	-4.57	0.0001057	0.001486	YOUNG-BIASED
chr1	32930451	32930601	-1.41	-4.69	7.772e-05	0.001206	YOUNG-BIASED
chr1	32936671	32936821	-1.11	-3.58	0.001382	0.008837	YOUNG-BIASED
chr1	32961520	32961670	-3.14	-5.72	5.224e-06	0.0002227	YOUNG-BIASED
chr1	32966303	32966453	-1.56	-3.77	0.0008682	0.006357	YOUNG-BIASED
chr1	32986163	32986313	-0.87	-3.17	0.003949	0.01871	YOUNG-BIASED
chr1	33005440	33005590	-1.44	-2.65	0.01368	0.04593	YOUNG-BIASED
chr1	33078028	33078178	1.63	3.69	0.001059	0.007322	OLD-BIASED
chr1	33085817	33085967	-4.18	-7.74	3.497e-08	1.914e-05	YOUNG-BIASED
chr1	33132659	33132809	1.71	2.65	0.01352	0.04553	OLD-BIASED
chr1	33149981	33150131	-2	-5.73	5.154e-06	0.0002212	YOUNG-BIASED
chr1	33168369	33168519	-1.28	-3.66	0.001137	0.007699	YOUNG-BIASED
chr1	33168520	33168670	-0.88	-2.64	0.01394	0.04656	YOUNG-BIASED
chr1	33177943	33178093	-0.97	-3.39	0.002247	0.01249	YOUNG-BIASED
chr1	33207739	33207889	-1.39	-3.22	0.003476	0.01708	YOUNG-BIASED
chr1	33208055	33208205	-0.89	-2.86	0.008382	0.03221	YOUNG-BIASED
chr1	33220245	33220395	-1.13	-3.9	0.0006162	0.005003	YOUNG-BIASED
chr1	33220448	33220598	-0.94	-3.52	0.001615	0.009872	YOUNG-BIASED
chr1	33231734	33231884	-1.25	-3.88	0.0006483	0.005182	YOUNG-BIASED
chr1	33233367	33233517	-1.07	-4.42	0.0001588	0.001959	YOUNG-BIASED
chr1	33237686	33237836	-1	-3.36	0.002461	0.01333	YOUNG-BIASED
chr1	33238423	33238573	-1.08	-4.27	0.0002326	0.002546	YOUNG-BIASED
chr1	33252545	33252695	-1.92	-5.41	1.184e-05	0.0003562	YOUNG-BIASED
chr1	33272319	33272469	-2.39	-3.69	0.001055	0.007303	YOUNG-BIASED
chr1	33294090	33294240	-2.52	-4.3	0.000219	0.00244	YOUNG-BIASED
chr1	33314111	33314261	-1.12	-2.66	0.01338	0.04517	YOUNG-BIASED
chr1	33336515	33336665	-1.99	-5.2	2.042e-05	0.0004997	YOUNG-BIASED
chr1	33337085	33337235	-0.63	-2.64	0.01377	0.04614	YOUNG-BIASED
chr1	33342283	33342433	-1.05	-3.64	0.001201	0.008009	YOUNG-BIASED
chr1	33343662	33343812	-1.11	-4.73	7.066e-05	0.001129	YOUNG-BIASED
chr1	33347793	33347943	-1.37	-4.31	0.0002098	0.002369	YOUNG-BIASED
chr1	33351339	33351489	-0.87	-3.52	0.001636	0.009962	YOUNG-BIASED
chr1	33351905	33352055	-1.26	-3.7	0.001021	0.007127	YOUNG-BIASED
chr1	33359025	33359175	-1.53	-4.82	5.537e-05	0.000959	YOUNG-BIASED
chr1	33373181	33373331	-1.75	-4.59	0.0001014	0.001444	YOUNG-BIASED
chr1	33385587	33385737	-2.89	-4.94	4.024e-05	0.0007764	YOUNG-BIASED
chr1	33390504	33390654	-0.62	-3.02	0.005688	0.02433	YOUNG-BIASED
chr1	33412171	33412321	-1.94	-4.33	0.0002014	0.002302	YOUNG-BIASED
chr1	33414355	33414505	-7.66	-7.56	5.383e-08	2.346e-05	YOUNG-BIASED
chr1	33415202	33415352	-1.1	-3.95	0.0005391	0.004555	YOUNG-BIASED
chr1	33428799	33428949	-0.92	-4.51	0.0001263	0.001678	YOUNG-BIASED
chr1	33430003	33430153	-2.38	-5.52	8.846e-06	0.0002998	YOUNG-BIASED
chr1	33430175	33430325	-1.16	-3.47	0.001841	0.01084	YOUNG-BIASED
chr1	33471730	33471880	1.41	3.61	0.0013	0.008465	OLD-BIASED
chr1	33473003	33473153	-0.99	-2.79	0.009833	0.03615	YOUNG-BIASED
chr1	33476729	33476879	-1.52	-4.05	0.0004132	0.003787	YOUNG-BIASED
chr1	33508571	33508721	-2.17	-5	3.477e-05	0.0007068	YOUNG-BIASED
chr1	33526391	33526541	-1.41	-3.19	0.00368	0.01779	YOUNG-BIASED
chr1	33540147	33540297	-1.88	-3.19	0.003689	0.01782	YOUNG-BIASED
chr1	33551760	33551910	-1.04	-3.16	0.004027	0.01897	YOUNG-BIASED
chr1	33560751	33560901	-1.11	-3.82	0.0007532	0.005758	YOUNG-BIASED
chr1	33562130	33562280	-1.33	-4.71	7.476e-05	0.001175	YOUNG-BIASED
chr1	33592747	33592897	-0.68	-2.61	0.01481	0.04865	YOUNG-BIASED
chr1	33593171	33593321	-0.71	-3.06	0.005079	0.02244	YOUNG-BIASED
chr1	33608699	33608849	-1.03	-2.79	0.009853	0.03621	YOUNG-BIASED
chr1	33618767	33618917	-1.17	-3.59	0.001373	0.00879	YOUNG-BIASED
chr1	33621804	33621954	-1.44	-5.53	8.635e-06	0.0002955	YOUNG-BIASED
chr1	33627057	33627207	-1.52	-4.01	0.0004634	0.004106	YOUNG-BIASED
chr1	33629213	33629363	-1.01	-3.18	0.003783	0.01814	YOUNG-BIASED
chr1	33629561	33629711	-1.11	-3.23	0.00335	0.01662	YOUNG-BIASED
chr1	33629881	33630031	-1.21	-4.29	0.000222	0.002463	YOUNG-BIASED
chr1	33634091	33634241	-0.93	-3.24	0.003287	0.0164	YOUNG-BIASED
chr1	33636723	33636873	-1.87	-4.47	0.0001398	0.001797	YOUNG-BIASED
chr1	33647205	33647355	-1.11	-3.39	0.002242	0.01247	YOUNG-BIASED
chr1	33694555	33694705	-1.09	-5.5	9.249e-06	0.0003075	YOUNG-BIASED
chr1	33705574	33705724	-2.19	-3.93	0.0005711	0.004743	YOUNG-BIASED
chr1	33722383	33722533	-1.23	-4.31	0.0002089	0.002361	YOUNG-BIASED
chr1	33766939	33767089	-1.69	-5.57	7.767e-06	0.0002777	YOUNG-BIASED
chr1	33772213	33772363	-1.09	-3.31	0.002752	0.01445	YOUNG-BIASED
chr1	33772365	33772515	-1.6	-4.89	4.577e-05	0.0008448	YOUNG-BIASED
chr1	33803080	33803230	1.03	2.8	0.009487	0.03522	OLD-BIASED
chr1	33813587	33813737	-1.67	-3.55	0.00152	0.00946	YOUNG-BIASED
chr1	33814956	33815106	-1.03	-3.05	0.005285	0.02308	YOUNG-BIASED
chr1	33827331	33827481	-0.83	-2.75	0.01069	0.03844	YOUNG-BIASED
chr1	33833393	33833543	-0.68	-3.07	0.004939	0.02198	YOUNG-BIASED
chr1	33848438	33848588	-1.15	-3.62	0.001264	0.008301	YOUNG-BIASED
chr1	33849003	33849153	-3.15	-3.35	0.002472	0.01338	YOUNG-BIASED
chr1	33849813	33849963	-0.95	-2.6	0.01536	0.04995	YOUNG-BIASED
chr1	33854907	33855057	-1.91	-3.26	0.003128	0.01583	YOUNG-BIASED
chr1	33896332	33896482	-0.87	-2.76	0.0104	0.03767	YOUNG-BIASED
chr1	33921564	33921714	-1.16	-3.98	0.000497	0.004308	YOUNG-BIASED
chr1	33936188	33936338	-1.22	-3.69	0.001048	0.007265	YOUNG-BIASED
chr1	33981419	33981569	-1.9	-5.27	1.703e-05	0.000445	YOUNG-BIASED
chr1	34072036	34072186	-1.23	-4.04	0.0004262	0.00387	YOUNG-BIASED
chr1	34078638	34078788	-1.27	-4.99	3.543e-05	0.0007157	YOUNG-BIASED
chr1	34121295	34121445	-1.1	-3.55	0.001526	0.009486	YOUNG-BIASED
chr1	34201355	34201505	-2.79	-6.1	1.991e-06	0.0001342	YOUNG-BIASED
chr1	34368712	34368862	-1.66	-4.28	0.0002285	0.002514	YOUNG-BIASED
chr1	34845240	34845390	-3.06	-4.8	5.817e-05	0.000991	YOUNG-BIASED
chr1	35063604	35063754	-0.94	-2.85	0.008486	0.0325	YOUNG-BIASED
chr1	35147163	35147313	-1.39	-5.06	2.964e-05	0.0006368	YOUNG-BIASED
chr1	35208317	35208467	-1.31	-5.52	8.808e-06	0.000299	YOUNG-BIASED
chr1	35252223	35252373	-1.38	-4.39	0.0001722	0.002073	YOUNG-BIASED
chr1	35256592	35256742	-1.72	-4.31	0.0002119	0.002385	YOUNG-BIASED
chr1	35264434	35264584	-2.11	-6.34	1.083e-06	9.943e-05	YOUNG-BIASED
chr1	35301471	35301621	-0.88	-3.32	0.002709	0.01429	YOUNG-BIASED
chr1	35309189	35309339	-1.19	-4.43	0.0001542	0.001922	YOUNG-BIASED
chr1	35324851	35325001	-1.18	-4.51	0.0001237	0.001654	YOUNG-BIASED
chr1	35325050	35325200	-0.8	-2.99	0.006081	0.02554	YOUNG-BIASED
chr1	35331733	35331883	-1.5	-4.46	0.0001416	0.001813	YOUNG-BIASED
chr1	35336163	35336313	-0.74	-3.25	0.003183	0.01603	YOUNG-BIASED
chr1	35390532	35390682	-1.38	-3.29	0.002898	0.01499	YOUNG-BIASED
chr1	35395132	35395282	-1.98	-4.33	0.0002011	0.0023	YOUNG-BIASED
chr1	35444561	35444711	-0.95	-3.32	0.002722	0.01433	YOUNG-BIASED
chr1	35450247	35450397	-0.94	-3.81	0.0007747	0.00587	YOUNG-BIASED
chr1	35450399	35450549	-0.84	-4.07	0.0003911	0.003644	YOUNG-BIASED
chr1	35496968	35497118	-1.46	-4.63	9.128e-05	0.001344	YOUNG-BIASED
chr1	35657652	35657802	-0.91	-3.05	0.005251	0.02298	YOUNG-BIASED
chr1	35667755	35667905	-0.98	-3.25	0.003234	0.01621	YOUNG-BIASED
chr1	35667909	35668059	-2.4	-5.67	5.967e-06	0.0002395	YOUNG-BIASED
chr1	35680952	35681102	-2.31	-6.58	5.871e-07	7.431e-05	YOUNG-BIASED
chr1	35688427	35688577	-1.53	-3.26	0.003148	0.0159	YOUNG-BIASED
chr1	35730743	35730893	-1.48	-4.35	0.0001901	0.002213	YOUNG-BIASED
chr1	35734547	35734697	-1.37	-4.15	0.0003191	0.003165	YOUNG-BIASED
chr1	35734701	35734851	-0.86	-3.13	0.004362	0.0201	YOUNG-BIASED
chr1	35764211	35764361	-1.5	-5.95	2.901e-06	0.0001633	YOUNG-BIASED
chr1	35767490	35767640	-0.95	-2.77	0.01024	0.03724	YOUNG-BIASED
chr1	35770525	35770675	4.75	4.1	0.0003657	0.003479	OLD-BIASED
chr1	35816443	35816593	-1.77	-2.64	0.01386	0.04636	YOUNG-BIASED
chr1	35825319	35825469	-4.99	-4.24	0.0002555	0.002715	YOUNG-BIASED
chr1	35835622	35835772	-3.87	-6.52	6.862e-07	7.986e-05	YOUNG-BIASED
chr1	35835910	35836060	-1.7	-4.43	0.0001543	0.001922	YOUNG-BIASED
chr1	35845025	35845175	3.56	3.12	0.004409	0.02026	OLD-BIASED
chr1	35916721	35916871	-0.67	-2.88	0.007869	0.03077	YOUNG-BIASED
chr1	35953942	35954092	-2.49	-2.75	0.01076	0.0386	YOUNG-BIASED
chr1	35971802	35971952	-1.91	-4.3	0.0002171	0.002425	YOUNG-BIASED
chr1	36019918	36020068	-2.64	-4.79	5.916e-05	0.001003	YOUNG-BIASED
chr1	36025252	36025402	-0.84	-3.13	0.004304	0.01991	YOUNG-BIASED
chr1	36030275	36030425	-1.27	-4.88	4.669e-05	0.0008564	YOUNG-BIASED
chr1	36034579	36034729	-1.3	-4.06	0.00041	0.003768	YOUNG-BIASED
chr1	36038885	36039035	-1.29	-3.73	0.0009429	0.006737	YOUNG-BIASED
chr1	36040885	36041035	-0.91	-2.85	0.008433	0.03235	YOUNG-BIASED
chr1	36103220	36103370	-6.61	-5.28	1.643e-05	0.0004353	YOUNG-BIASED
chr1	36173392	36173542	-1.59	-3.87	0.0006694	0.005302	YOUNG-BIASED
chr1	36173621	36173771	-1.43	-3.06	0.005091	0.02247	YOUNG-BIASED
chr1	36181175	36181325	-1.15	-4	0.0004771	0.004189	YOUNG-BIASED
chr1	36184026	36184176	-0.74	-3.29	0.00292	0.01507	YOUNG-BIASED
chr1	36192663	36192813	-1.29	-5.14	2.384e-05	0.0005525	YOUNG-BIASED
chr1	36235029	36235179	-0.9	-3.58	0.001402	0.008925	YOUNG-BIASED
chr1	36235289	36235439	-0.79	-2.99	0.006062	0.02549	YOUNG-BIASED
chr1	36240351	36240501	-1.05	-4.47	0.0001404	0.001802	YOUNG-BIASED
chr1	36273925	36274075	-1.32	-3.52	0.001629	0.009929	YOUNG-BIASED
chr1	36317241	36317391	-2.83	-3.74	0.0009243	0.006643	YOUNG-BIASED
chr1	36323231	36323381	-4.53	-3.33	0.002622	0.01395	YOUNG-BIASED
chr1	36342756	36342906	-1.87	-5.72	5.236e-06	0.000223	YOUNG-BIASED
chr1	36349018	36349168	-1.25	-3.33	0.002611	0.01392	YOUNG-BIASED
chr1	36349223	36349373	-1.25	-3.93	0.0005642	0.004702	YOUNG-BIASED
chr1	36391453	36391603	-0.82	-2.94	0.006855	0.02785	YOUNG-BIASED
chr1	36396608	36396758	-1.34	-3.95	0.0005378	0.004548	YOUNG-BIASED
chr1	36396840	36396990	-0.96	-3.4	0.002196	0.01229	YOUNG-BIASED
chr1	36401375	36401525	-6.74	-6.43	8.564e-07	8.871e-05	YOUNG-BIASED
chr1	36549837	36549987	-1.1	-3.32	0.002717	0.01432	YOUNG-BIASED
chr1	36550067	36550217	-0.95	-3.11	0.004559	0.02074	YOUNG-BIASED
chr1	36554573	36554723	-1.23	-3.95	0.000543	0.004579	YOUNG-BIASED
chr1	36565425	36565575	-1.01	-3.57	0.001427	0.009041	YOUNG-BIASED
chr1	36580871	36581021	-0.92	-2.68	0.0126	0.04326	YOUNG-BIASED
chr1	36590825	36590975	-1.65	-3.21	0.003578	0.01743	YOUNG-BIASED
chr1	36600329	36600479	-0.83	-3.19	0.003679	0.01779	YOUNG-BIASED
chr1	36600779	36600929	-1.13	-4.01	0.0004626	0.004101	YOUNG-BIASED
chr1	36615474	36615624	-1.1	-4.96	3.812e-05	0.0007497	YOUNG-BIASED
chr1	36632810	36632960	-0.88	-2.7	0.01197	0.04168	YOUNG-BIASED
chr1	36641249	36641399	-1.11	-3.73	0.0009423	0.006734	YOUNG-BIASED
chr1	36653736	36653886	-0.56	-2.6	0.01514	0.04943	YOUNG-BIASED
chr1	36704061	36704211	-3.94	-5.85	3.798e-06	0.0001874	YOUNG-BIASED
chr1	36714031	36714181	2.31	4.06	0.0004052	0.003735	OLD-BIASED
chr1	36734955	36735105	-3.78	-5.36	1.328e-05	0.0003806	YOUNG-BIASED
chr1	36735251	36735401	2.44	3.72	0.00097	0.006875	OLD-BIASED
chr1	36738451	36738601	-2.71	-3.07	0.004979	0.02211	YOUNG-BIASED
chr1	36745512	36745662	1.21	2.89	0.007807	0.0306	OLD-BIASED
chr1	36751358	36751508	-1.15	-3.04	0.005437	0.02354	YOUNG-BIASED
chr1	36756541	36756691	1.67	3.13	0.004305	0.01991	OLD-BIASED
chr1	36772187	36772337	-0.89	-3.37	0.002356	0.01292	YOUNG-BIASED
chr1	36772597	36772747	-0.99	-3.59	0.001365	0.008755	YOUNG-BIASED
chr1	36781429	36781579	-2.78	-4.06	0.0004051	0.003735	YOUNG-BIASED
chr1	36808497	36808647	-1.16	-4.31	0.0002085	0.002359	YOUNG-BIASED
chr1	36815033	36815183	-1.72	-5.07	2.877e-05	0.0006247	YOUNG-BIASED
chr1	36831900	36832050	-0.96	-3.61	0.001283	0.00839	YOUNG-BIASED
chr1	36834641	36834791	-0.99	-4	0.000475	0.004176	YOUNG-BIASED
chr1	36905785	36905935	1.3	2.92	0.007268	0.02905	OLD-BIASED
chr1	36930189	36930339	-0.72	-3.06	0.005083	0.02245	YOUNG-BIASED
chr1	36982064	36982214	-1.54	-5.22	1.925e-05	0.0004815	YOUNG-BIASED
chr1	37019521	37019671	-0.68	-3.04	0.005382	0.02337	YOUNG-BIASED
chr1	37253224	37253374	-0.89	-3.17	0.003888	0.01849	YOUNG-BIASED
chr1	37269893	37270043	-1.15	-3.03	0.005536	0.02386	YOUNG-BIASED
chr1	37279805	37279955	-0.79	-2.98	0.006275	0.02612	YOUNG-BIASED
chr1	37351548	37351698	-1.23	-4	0.0004801	0.004206	YOUNG-BIASED
chr1	37432016	37432166	-0.72	-2.69	0.01228	0.04247	YOUNG-BIASED
chr1	37443417	37443567	-0.88	-2.88	0.007901	0.03086	YOUNG-BIASED
chr1	37513059	37513209	-0.67	-2.72	0.01157	0.04069	YOUNG-BIASED
chr1	37856981	37857131	-1.01	-2.69	0.01249	0.043	YOUNG-BIASED
chr1	37900034	37900184	-1.19	-4.59	0.0001009	0.001439	YOUNG-BIASED
chr1	37931413	37931563	-2.49	-5.25	1.804e-05	0.0004617	YOUNG-BIASED
chr1	37939929	37940079	-1.46	-4.28	0.0002293	0.00252	YOUNG-BIASED
chr1	37965007	37965157	-1.29	-3.54	0.001529	0.009499	YOUNG-BIASED
chr1	37980099	37980249	-0.87	-2.76	0.01052	0.03799	YOUNG-BIASED
chr1	37980304	37980454	-0.91	-3.23	0.003405	0.01682	YOUNG-BIASED
chr1	38000207	38000357	-2.9	-5.47	9.992e-06	0.0003221	YOUNG-BIASED
chr1	38019725	38019875	-1.03	-3.65	0.001167	0.00785	YOUNG-BIASED
chr1	38022555	38022705	-1.08	-5.06	2.936e-05	0.000633	YOUNG-BIASED
chr1	38022830	38022980	-0.98	-3.55	0.001528	0.009495	YOUNG-BIASED
chr1	38061657	38061807	-0.71	-3.35	0.002517	0.01355	YOUNG-BIASED
chr1	38068873	38069023	-1.65	-5.18	2.146e-05	0.0005166	YOUNG-BIASED
chr1	38100571	38100721	-1.66	-4.61	9.662e-05	0.001397	YOUNG-BIASED
chr1	38148229	38148379	-0.97	-4.31	0.000213	0.002394	YOUNG-BIASED
chr1	38273842	38273992	-0.85	-2.96	0.006453	0.02666	YOUNG-BIASED
chr1	38274044	38274194	-1.13	-3.41	0.002172	0.0122	YOUNG-BIASED
chr1	38276853	38277003	-0.89	-3.86	0.0006854	0.005388	YOUNG-BIASED
chr1	38283335	38283485	-0.82	-2.63	0.01424	0.04728	YOUNG-BIASED
chr1	38316995	38317145	-2.58	-3.42	0.002096	0.01189	YOUNG-BIASED
chr1	38356281	38356431	-3.48	-5.42	1.154e-05	0.0003508	YOUNG-BIASED
chr1	38391747	38391897	-2.62	-7.3	1.004e-07	3.205e-05	YOUNG-BIASED
chr1	38398560	38398710	-1.56	-4.52	0.0001214	0.001633	YOUNG-BIASED
chr1	38412155	38412305	-0.83	-2.71	0.01185	0.04139	YOUNG-BIASED
chr1	38412365	38412515	-0.98	-3.29	0.002897	0.01499	YOUNG-BIASED
chr1	38424445	38424595	-1.92	-2.79	0.009712	0.03583	YOUNG-BIASED
chr1	38440769	38440919	-2.81	-7.93	2.255e-08	1.548e-05	YOUNG-BIASED
chr1	38470647	38470797	-0.63	-2.73	0.01137	0.04017	YOUNG-BIASED
chr1	38484673	38484823	-2.48	-4.08	0.0003803	0.003574	YOUNG-BIASED
chr1	38495264	38495414	-1.31	-5.17	2.214e-05	0.0005263	YOUNG-BIASED
chr1	38495659	38495809	-1.05	-3.5	0.001728	0.01036	YOUNG-BIASED
chr1	38503449	38503599	-1.13	-3.47	0.00186	0.01092	YOUNG-BIASED
chr1	38512871	38513021	-1.06	-3.01	0.00579	0.02465	YOUNG-BIASED
chr1	38537468	38537618	-1.1	-3.53	0.001593	0.009775	YOUNG-BIASED
chr1	38541841	38541991	-0.97	-2.92	0.007196	0.02884	YOUNG-BIASED
chr1	38566903	38567053	-1.41	-3.51	0.001677	0.01014	YOUNG-BIASED
chr1	38593105	38593255	-1	-3.38	0.002307	0.01273	YOUNG-BIASED
chr1	38645291	38645441	-1.42	-3.8	0.0007906	0.005952	YOUNG-BIASED
chr1	38667237	38667387	-1.69	-4.23	0.0002602	0.002749	YOUNG-BIASED
chr1	38674434	38674584	-0.84	-2.99	0.006023	0.02537	YOUNG-BIASED
chr1	38675755	38675905	-1.22	-5.02	3.253e-05	0.0006767	YOUNG-BIASED
chr1	38686079	38686229	-1.25	-2.99	0.006073	0.02552	YOUNG-BIASED
chr1	38759327	38759477	-0.69	-2.85	0.008416	0.0323	YOUNG-BIASED
chr1	38766069	38766219	-1.58	-3.36	0.002416	0.01316	YOUNG-BIASED
chr1	38963795	38963945	-1.18	-3.49	0.001779	0.01057	YOUNG-BIASED
chr1	38973865	38974015	-1.34	-2.97	0.006417	0.02655	YOUNG-BIASED
chr1	39027517	39027667	-0.77	-2.7	0.01215	0.04212	YOUNG-BIASED
chr1	39030941	39031091	-0.77	-2.7	0.01206	0.04192	YOUNG-BIASED
chr1	39037522	39037672	-1.77	-4.43	0.0001539	0.001919	YOUNG-BIASED
chr1	39044153	39044303	-1.61	-4.92	4.298e-05	0.0008098	YOUNG-BIASED
chr1	39074037	39074187	-1	-3.35	0.002476	0.01339	YOUNG-BIASED
chr1	39080120	39080270	-1.29	-3.03	0.005572	0.02397	YOUNG-BIASED
chr1	39090208	39090358	-1.25	-2.86	0.008241	0.03181	YOUNG-BIASED
chr1	39151170	39151320	1.36	3.1	0.004606	0.0209	OLD-BIASED
chr1	39193825	39193975	-0.99	-4.09	0.000374	0.003533	YOUNG-BIASED
chr1	39269837	39269987	-1.71	-4.43	0.0001529	0.001911	YOUNG-BIASED
chr1	39284109	39284259	-0.93	-3.25	0.00323	0.0162	YOUNG-BIASED
chr1	39284267	39284417	-1.19	-3.51	0.001652	0.01003	YOUNG-BIASED
chr1	39300950	39301100	-2.54	-4.91	4.391e-05	0.0008214	YOUNG-BIASED
chr1	39305195	39305345	-1.19	-3.45	0.001934	0.01123	YOUNG-BIASED
chr1	39338833	39338983	-0.9	-2.97	0.006369	0.0264	YOUNG-BIASED
[truncated: 63,536 more rows]

## Sheet: Development - Age Regions
Observed Overlaps between Developmental/Age-altered Regions:						Percentage Overlaps:
*Chi-sq test p-value < 1e-16
	ADULT-BIASED	FETAL-BIASED				ADULT-BIASED	FETAL-BIASED
OLD-BIASED	103340	10179			OLD-BIASED	0.910573	0.0896915
YOUNG-BIASED	26001	73144			YOUNG-BIASED	0.26308	0.740077
Observed Overlaps between Developmental/Age-altered Regions:
	ADULT-BIASED	FETAL-BIASED
OLD-BIASED	69041.6	44477.4
YOUNG-BIASED	60299.4	38845.6

## Sheet: Methylation Sites Analyses
Hypermethylation Clock Sites						Hypomethylation Clock Sites						Development-altered Region Set Enrichment Testing:									Age-altered Region Set Enrichment Testing:
chr15	74495354	74495355	cg00075967	STRA6		chr17	36295128	36295129	cg00091693	KRT20		pval	n	observed	zscore	alternate	match				pval	n	observed	zscore	alternate	match
chr17	66303145	66303146	cg00374717	ARSG		chr10	35934436	35934437	cg00168942	CX40.1		0.000999001	1000	19	11.4201	greater	DEV_FETALBIASED_neg_age_clocks				0.000999001	1000	10	9.1153	greater	YOUNGBIASED_neg_age_clocks
chr12	80085268	80085269	cg00864867	PAWR		chr12	14930292	14930293	cg00431549	MGP		0.000999001	1000	15	8.0517	greater	DEV_FETALBIASED_pos_age_clocks				0.000999001	1000	6	4.409	greater	YOUNGBIASED_pos_age_clocks
chr7	54827677	54827678	cg00945507	SEC61G		chr10	135190730	135190731	cg00436603	CYP2E1		0.462537	1000	3	-0.4523	less	DEV_ADULTBIASED_neg_age_clocks				0.408591	1000	0	-0.9251	less	OLDBIASED_neg_age_clocks
chr9	131842738	131842739	cg01027739	DOLPP1		chr14	20636703	20636704	cg01027805	ZNF219		0.250749	1000	3	-0.9615	less	DEV_ADULTBIASED_pos_age_clocks				0.336663	1000	0	-1.0444	less	OLDBIASED_pos_age_clocks
chr7	31726912	31726913	cg01353448	C7orf16		chr11	125731217	125731218	cg01234063	ST3GAL4		0.000999001	1000	28568	69.5949	greater	DEV_PEAKSETS_UCSC_cpg_sites				0.000999001	1000	12405	101.159	greater	ADULT_AGE_PEAKSETS_UCSC_cpg_sites
chr7	100663367	100663368	cg01584473	MUC17		chr21	37502356	37502357	cg01262913	DSCR9		0.000999001	1000	40	7.0982	greater	All DEV Sites all Clock Sites				0.000999001	1000	16	5.8186	greater	ALLSITES_all_Clock_Sites
chr19	58193231	58193232	cg01644850	ZNF551		chr22	27498514	27498515	cg01407797	FLJ33814
chr10	31273710	31273711	cg01656216	ZNF438		chr1	167865836	167865837	cg01459453	SELP		FETALBIASED Region Intersects			ADULTBIASED Region Intersects						YOUNG-BIASED Region Intersects			OLD-BIASED Region Intersects
chr9	74526649	74526650	cg01873645	C9orf85		chr17	34115725	34115726	cg01485645	MLLT6		ALKBH3			C10orf99						ALOX12
chr2	86565038	86565039	cg01968178	REEP1		chr11	56860207	56860208	cg01511567	SSRP1		ALOX12			CYP2E1						BCMO1
chr19	6739192	6739193	cg02085507	TRIP10		chr10	72215430	72215431	cg01560871	C10orf27		BCMO1			FLJ37970						CLEC3B
chr2	74756234	74756235	cg02154074	HTRA2		chr6	3794271	3794272	cg01570885	FAM50B		C6orf208			LOC161931						DDR1
chr6	62996697	62996698	cg02217159	KHDRBS2		chr12	6752344	6752345	cg01820374	LAG3		C7orf16			RPS6KL1						FAM62C
chr16	2391081	2391082	cg02331561	ABCA3		chr20	62058146	62058147	cg02047577	UCKL1		CASC4			TMSL3						FLJ33790
chr9	139840678	139840679	cg02332492	C8G		chr15	38973265	38973266	cg02071305	VPS18		CCNF									GNAS
chr12	58005758	58005759	cg02364642	GEFT		chr1	177529085	177529086	cg02275294	SOAT1		CLEC3B									HOXB8
chr8	41165699	41165700	cg02388150	SFRP1		chr3	132228638	132228639	cg02335441	ASTE1		DDR1									LOC201164
chr19	4769653	4769654	cg02479575	C19orf30		chr3	51679391	51679392	cg03019000	TEX264		DEPDC1									MGC50721
chr19	15121531	15121532	cg02489552	FLJ40365		chr15	42368265	42368266	cg03286783	CASC4		DSCR9									NAT10
chr17	39526726	39526727	cg02580606	KRTHA3B		chr3	128875093	128875094	cg03330058	ABTB1		ELAC2									P2RXL1
chr9	86572014	86572015	cg02654291	C9orf64		chr15	68934361	68934362	cg03578041	LARP6		FAM62C									PQLC1
chr4	95129403	95129404	cg02827112	SMARCAD1		chr7	94124889	94124890	cg03682823	SGCE		FBXO28									SCGN
chr2	86668068	86668069	cg02972551	JMJD1A		chr3	51991878	51991879	cg03891319	ACY1		FLJ33790									TUBB2B
chr4	52917271	52917272	cg03103192	SPATA18		chr2	200528399	200528400	cg03947362	FLJ37953		GAP43									USP10
chr21	18886093	18886094	cg03167275	CXADR		chr3	31997771	31997772	cg04005032	OSBPL10		GLB1
chr6	30851638	30851639	cg03270204	DDR1		chr9	37455712	37455713	cg04094160	ZBTB5		GNAS
chr17	16472866	16472867	cg03565323	ZNF287		chr17	71022680	71022681	cg04121983	CASKIN2		HOXB8
chr14	91720173	91720174	cg03588357	GPR68		chr10	73393227	73393228	cg04268405	CHST3		HRC
chr17	6899297	6899298	cg03760483	ALOX12		chr5	126880923	126880924	cg04431054	LOC133619		LOC201164
chr7	100809049	100809050	cg04084157	VGF		chr6	56815646	56815647	cg04452713	DST		MGC50721
chr10	85932763	85932764	cg04126866	C10orf99		chr3	51983527	51983528	cg04474832	ABHD14A		NAT10
chr7	130418315	130418316	cg04528819	KLF14		chr7	149657983	149657984	cg04999691	C7orf29		P2RXL1
chr13	99739382	99739383	cg04836038	DOCK9		chr22	19699010	19699011	cg05442902	P2RXL1		PPP1R16B
chr19	9473565	9473566	cg05250458	ZNF177		chr17	17050295	17050296	cg05590257	LOC201164		PQLC1
chr19	51569106	51569107	cg05294243	KLK13		chr2	170044413	170044414	cg05847778	BBS5		SCGN
chr8	23262073	23262074	cg05365729	LOXL2		chr17	1534638	1534639	cg05903609	PRPF8		SMARCAD1
chr1	110754257	110754258	cg05675373	KCNC4		chr4	91979252	91979253	cg06044899	TMSL3		STRA6
chr8	120079625	120079626	cg05755779	COLEC10		chr3	45042792	45042793	cg06117855	CLEC3B		TBC1D23
chr19	42380725	42380726	cg05921699	CD79A		chr11	34083290	34083291	cg06513075	NAT10		TJP1
chr4	56376020	56376021	cg05960024	CLOCK		chr16	55777598	55777599	cg06688848	RSPRY1		TUBB2B
chr15	44956098	44956099	cg06121469	KIAA1840		chr1	56882991	56882992	cg06836772	PRKAA2		USP10
chr17	27369780	27369781	cg06144905	PIPOX		chr20	48166074	48166075	cg06926735	UBE2V1		WDR69
chr16	2478781	2478782	cg06361108	CCNF		chr9	70840057	70840058	cg07158339	FXN
chr12	104235479	104235480	cg06462291	NT5DC3		chr1	39264046	39264047	cg07388493	NDUFS5		Development-altered Region Set – Gene Locus Intersections									Age-altered Region Set – Gene Locus Intersections
chr6	25652602	25652603	cg06493994	SCGN		chr19	15451532	15451533	cg07408456	PGLYRP2
chr17	32907002	32907003	cg06557358	LOC124842		chr12	92595354	92595355	cg07498421	CRADD		DOWNADULT Locus Intersects			UPADULT Locus Intersects						YOUNG-AGE Locus Intersects			OLD-AGE Locus Intersects
chr14	52780634	52780635	cg06738602	PTGER2		chr5	32747186	32747187	cg07663789	NPR3		MGP			KRT20						PQLC1			MUC17
chr16	1665094	1665095	cg06810647	CRAMP1L		chr11	67534528	67534529	cg07730301	ALDH3B1		CASC4			UCKL1						RXRA			C9orf85
chr19	19327990	19327991	cg06952310	CSPG3		chr8	144191481	144191482	cg07770222	C8orf31		SGCE			PQLC1						CSNK1D			NHLRC1
chr15	65810204	65810205	cg06993413	DPP8		chr22	26527796	26527797	cg07849904	MN1		DST			CSNK1D						HOXB8
chr9	134613015	134613016	cg07285276	RAPGEF1		chr3	45858680	45858681	cg08186124	LZTFL1		UBE2V1			MUC17						ABCA3
chr19	48949441	48949442	cg07291563	GRWD1		chr16	2016598	2016599	cg08331960	SLC9A3R2		FXN			GPR68						RAPGEF1
chr1	150953943	150953944	cg07337598	ANXA9		chr14	74457858	74457859	cg09133026	RPS6KL1		CRADD			KLK13						JPH3
chr19	54605703	54605704	cg07455279	NDUFA3		chr18	75813281	75813282	cg09441152	PQLC1		MN1			KCNC4						TCF15
chr16	84224901	84224902	cg07595943	LOC161931		chr13	107719053	107719054	cg09646392	TNFSF13B		ACOT11			PRDM12						SNX8
chr2	25391839	25391840	cg08030082	POMC		chr17	70367538	70367539	cg09722397	GRIN2C		CD164			JPH3
chr8	67344640	67344641	cg08090772	ADHFE1		chr9	34652282	34652283	cg09722555	CCL27		MIB1			PITPNM3
chr17	32597714	32597715	cg08124722	CCL7		chr1	234624305	234624306	cg09809672	EDARADD		ENPP2			CDH1
chr2	135008923	135008924	cg08251036	MGAT5		chr1	111571814	111571815	cg10045881	CHI3L2		AIG1			PDGFB
chr15	96874031	96874032	cg08370996	NR2F2		chr1	54786297	54786298	cg10266490	ACOT11		TBC1D23			CYFIP1
chr1	68962940	68962941	cg08413469	DEPDC1		chr5	150708005	150708006	cg10345936	SLC36A2		ZHX1			SNX8
chr7	137531173	137531174	cg08434234	DGKI		chr6	169932037	169932038	cg10865119	C6orf208		CDCA2			PPP1R16B
chr5	17216434	17216435	cg08771731	BASP1		chr6	109810631	109810632	cg10940099	CD164		IL6ST
chr11	65325158	65325159	cg08965235	LTBP3		chr19	13123015	13123016	cg11025793	STX10		PLK2
chr10	52834498	52834499	cg09019938	PRKG1		chr9	127509604	127509605	cg11299964	MAPKAP1		HOXB8
chr1	68512971	68512972	cg09118625	DIRAS3		chr1	242072911	242072912	cg11314684	AKT3		ARSG
chr9	133540108	133540109	cg09191327	PRDM12		chr2	201083343	201083344	cg11388238	KCTD18		PAWR
chr12	80084718	80084719	cg09418283	PAWR		chr17	71412934	71412935	cg11653266	MRPL38		CXADR
chr17	40833697	40833698	cg09509673	CCR10		chr3	39210370	39210371	cg12413566	CMYA1		KLF14
chr4	6271658	6271659	cg09785172	WFS1		chr3	139636453	139636454	cg12616277	FAM62C		CLOCK
chr12	48120416	48120417	cg09869858	P11		chr3	33814393	33814394	cg12941369	PDCD6IP		DEPDC1
chr1	214776469	214776470	cg09885951	CENPF		chr18	17574536	17574537	cg12985418	MIB1		BASP1
chr12	114846399	114846400	cg10281002	TBX5		chr10	71059702	71059703	cg13129046	C10orf35		PRKG1
chr2	217724363	217724364	cg10376763	TNP1		chr22	44828771	44828772	cg13269407	FLJ10945		DIRAS3
chr11	125616888	125616889	cg10377274	PATE		chr12	14930699	14930700	cg13302154	MGP		CENPF
chr18	74961787	74961788	cg10486998	GALR1		chr11	65444453	65444454	cg13547237	Bles03		TBX5
chr2	227700458	227700459	cg10523019	RHBDD1		chr15	72969183	72969184	cg13828047	MPI		RBPMS
chr16	87635473	87635474	cg10920957	JPH3		chr7	24578943	24578944	cg13931228	MPP6		FGF18
chr22	42322146	42322147	cg11932564	TNFRSF13C		chr19	54618088	54618089	cg14060828	TIP39		PDLIM5
chr2	48982957	48982958	cg12351433	LHCGR		chr3	196645869	196645870	cg14163776	CENTB2		GAP43
chr22	17601381	17601382	cg12373771	CECR6		chr7	120823965	120823966	cg14175438	FAM3C		SCD5
chr19	44324951	44324952	cg12768605	LYPD5		chr8	42515275	42515276	cg14408969	C8orf40		HOXB4
chr19	38747796	38747797	cg12830694	PPP1R14A		chr8	120720833	120720834	cg14409958	ENPP2		FEM1C
chr19	3573751	3573752	cg12946225	HMG20B		chr3	153468123	153468124	cg14423778	MBNL1		RFC3
chr2	200819113	200819114	cg13038560	FLJ22555		chr20	56848355	56848356	cg14597908	GNAS		TIPARP
chr11	12030643	12030644	cg13216057	DKK3		chr16	3433998	3433999	cg14654875	ZNF597		SDC2
chr1	19746564	19746565	cg13319175	CAPZB		chr11	101723568	101723569	cg14727952	BIRC2		GRIA2
chr21	38379570	38379571	cg13460409	DSCR6		chr6	143423368	143423369	cg15185286	AIG1		SNX9
chr14	90798568	90798569	cg13682722	C14orf102		chr1	200191195	200191196	cg15262928	TIMM17A
chr15	30113723	30113724	cg13836627	TJP1		chr16	21920066	21920067	cg15703512	MGC50721
chr21	37757525	37757526	cg13854874	CHAF1B		chr6	137156206	137156207	cg15804973	MAP3K5
chr19	18344322	18344323	cg13899108	PDE4C		chr14	92868062	92868063	cg16034652	KIAA1409
chr7	130080553	130080554	cg13975369	TSGA14		chr1	154828571	154828572	cg16168311	APOA1BP
chr6	29323330	29323331	cg14258236	OR5V1		chr4	46691021	46691022	cg16358826	GABRA4
chr19	5784184	5784185	cg14308452	MGC24975		chr9	136358896	136358897	cg16408394	RXRA
chr2	228736135	228736136	cg14329157	WDR69		chr17	71487684	71487685	cg16419345	ACOX1
chr2	27274309	27274310	cg14424579	FLJ21839		chr4	82345049	82345050	cg16744741	PRKG2
chr8	12809014	12809015	cg14501253	FLJ36980		chr16	716459	716460	cg16899442	C16orf25
chr8	30241661	30241662	cg14658362	RBPMS		chr3	101462115	101462116	cg16984944	TBC1D23
chr17	6460572	6460573	cg14723032	PITPNM3		chr21	38955762	38955763	cg17274064	ERG
chr18	21270554	21270555	cg14894144	LAMA3		chr10	44775506	44775507	cg17324128	RASSF4
chr1	32687567	32687568	cg14992253	C1orf91		chr15	90196840	90196841	cg17338403	SLCO3A1
chr19	12992237	12992238	cg15341340	DNASE2		chr18	41558077	41558078	cg17589341	SLC14A1
chr6	128841972	128841973	cg15381769	PTPRK		chr17	50332768	50332769	cg17686885	TOM1L1
chr7	100034410	100034411	cg15547534	MGC22793		chr1	148532935	148532936	cg18031008	MRPS21
chr14	57960976	57960977	cg15661409	C14orf105		chr7	94124891	94124892	cg18139769	SGCE
chr19	49339789	49339790	cg15974053	DHRS10		chr3	51983578	51983579	cg18328933	ABHD14A
chr3	47621127	47621128	cg15988232	CSPG5		chr8	124356292	124356293	cg18956095	ZHX1
chr6	31080529	31080530	cg16150435	C6orf15		chr1	43005215	43005216	cg19044674	LEPRE1
chr8	48650511	48650512	cg16241714	CEBPD		chr1	36338443	36338444	cg19046959	COL8A2
chr5	170847251	170847252	cg16494477	FGF18		chr1	31857551	31857552	cg19420968	HCRTR1
chr11	75140681	75140682	cg16547529	FLJ33790		chr5	138754318	138754319	cg19569684	PACAP
chr12	6677158	6677159	cg16579101	NOL1		chr16	82736832	82736833	cg19706682	LRRC50
chr11	89224799	89224800	cg17063929	NOX4		chr12	30740381	30740382	cg19722847	IPO8
chr2	121549866	121549867	cg17099569	GLI2		chr9	5440936	5440937	cg19724470	CD274
chr22	50968343	50968344	cg17285325	ECGF1		chr17	77825385	77825386	cg19761273	CSNK1D
chr7	43769049	43769050	cg17408647	FLJ10803		chr22	36401623	36401624	cg19853760	LGALS1
chr16	68770944	68770945	cg17655614	CDH1		chr16	65421909	65421910	cg20100381	APPBP1
chr20	25566382	25566383	cg17729667	KIAA0980		chr11	44043999	44044000	cg20240860	PHACS
chr4	118954386	118954387	cg17853587	NDST3		chr1	23730622	23730623	cg21211748	E2F2
chr4	3465004	3465005	cg17960516	FLJ33718		chr8	25372488	25372489	cg21305265	CDCA2
chr6	31698226	31698227	cg18055007	DDAH2		chr11	47330784	47330785	cg21370143	MYBPC3
chr10	75402320	75402321	cg18180783	MYOZ1		chr19	19487814	19487815	cg21395782	NDUFA13
chr22	24093826	24093827	cg18440048	ZNF70		chr5	55326503	55326504	cg21950518	IL6ST
chr12	75603401	75603402	cg18573383	KCNC2		chr7	95063456	95063457	cg22171829	PDK4
chr1	47881256	47881257	cg18983672	FOXE3		chr19	61151046	61151047	cg22190114	NALP8
chr3	47555476	47555477	cg18984151	TMEM103		chr5	134237683	134237684	cg22197830	C5orf14
chr3	53080682	53080683	cg19008809	SFMBT1		chr19	63556658	63556659	cg22568540	A1BG
chr22	39640835	39640836	cg19167673	PDGFB		chr3	185561866	185561867	cg22613010	CLCN2
chr2	60983417	60983418	cg19273182	PAPOLG		chr11	43858983	43858984	cg22637507	ALKBH3
chr15	45544335	45544336	cg19305227	SLC28A2		chr16	79829782	79829783	cg22947000	BCMO1
chr10	127513190	127513191	cg19346193	UROS		chr4	88146730	88146731	cg23092072	AFF1
chr17	4642647	4642648	cg19478743	CXCL16		chr22	37878077	37878078	cg23124451	CBX7
chr1	95583636	95583637	cg19514928	TMEM56		chr3	33113631	33113632	cg23180365	GLB1
chr11	73661920	73661921	cg19692710	DNAJB13		chr1	46906183	46906184	cg23786576	ATPAF1
chr1	1168036	1168037	cg19945840	B3GALT6		chr14	87529619	87529620	cg24058132	GALC
chr22	22090486	22090487	cg20295671	YPEL1		chr8	27404857	27404858	cg24081819	EPHX2
chr4	95373302	95373303	cg20305610	PDLIM5		chr9	2828508	2828509	cg24471894	KIAA0020
chr3	47555100	47555101	cg20524216	TMEM103		chr15	89227671	89227672	cg24888049	FES
chr7	72848481	72848482	cg20692569	FZD9		chr20	16658314	16658315	cg24899750	SNRPB2
chr15	78423564	78423565	cg20761322	CIB2		chr11	113434374	113434375	cg25101936	ZBTB16
chr2	233896119	233896120	cg20795863	NEU2		chr5	57792559	57792560	cg25159610	PLK2
chr15	81070851	81070852	cg20828084	KIAA1199		chr22	18389063	18389064	cg25166896	C22orf25
chr3	115342333	115342334	cg20914508	GAP43		chr3	38281676	38281677	cg25411725	SLC22A13
chr4	83720240	83720241	cg20947775	SCD5		chr3	123716824	123716825	cg25564800	KPNA1
chr16	84734014	84734015	cg20999813	USP10		chr2	11727816	11727817	cg25657834	NTSR2
chr11	119188145	119188146	cg21096399	MCAM		chr17	39823254	39823255	cg25809905	ITGA2B
chr2	113817043	113817044	cg21378206	IL1F5		chr17	44047533	44047534	cg25928579	HOXB8
chr17	46656012	46656013	cg21460081	HOXB4		chr1	222368797	222368798	cg26043391	FBXO28
chr15	72612125	72612126	cg21801378	BRUNOL6		chr17	12862038	12862039	cg26162695	ELAC2
chr1	200842429	200842430	cg21870884	GPR25		chr22	44828125	44828126	cg26394940	FLJ10945
chr19	38827378	38827379	cg22006386	C19orf15		chr19	60321175	60321176	cg26456957	PPP1R12C
chr8	86350278	86350279	cg22289837	CA3		chr3	47492823	47492824	cg26614073	SCAP
chr15	22892697	22892698	cg22432269	CYFIP1		chr11	133600862	133600863	cg26723847	hCAP-D3
chr20	590243	590244	cg22449114	TCF15		chr6	38778415	38778416	cg26824091	GLO1
chr7	2353402	2353403	cg22679120	SNX8		chr16	21919905	21919906	cg27015931	MGC50721
chr6	18122719	18122720	cg22736354	NHLRC1		chr19	54350725	54350726	cg27016307	HRC
chr2	101618261	101618262	cg22809047	RPL31		chr1	221633332	221633333	cg27202708	C1orf65
chr1	68512777	68512778	cg22901840	DIRAS3		chr21	32707305	32707306	cg27544190	C21orf63
chr7	139025153	139025154	cg22920873	HSPC268
chr6	3228365	3228366	cg23517605	TUBB2B
chr20	45985596	45985597	cg23662675	PRKCBP1
chr5	114880796	114880797	cg23941599	FEM1C
chr20	137877	137878	cg24116886	DEFB127
chr11	6678143	6678144	cg24126851	DCHS1
chr13	34392869	34392870	cg24254120	RFC3
chr3	156391694	156391695	cg24262469	TIPARP
chr1	206681158	206681159	cg24450312	RASSF5
chr11	64106532	64106533	cg24580001	FLJ37970
chr20	37434552	37434553	cg24834740	PPP1R16B
chr8	97505868	97505869	cg25070637	SDC2
chr4	158141936	158141937	cg25148589	GRIA2
chr11	32605184	32605185	cg25505610	hfl-B5
chr8	22013999	22014000	cg25552492	LGI3
chr12	57030113	57030114	cg25683012	BAZ2A
chr16	58163814	58163815	cg25771195	GTL3
chr3	9404598	9404599	cg25781123	THUMPD3
chr16	23689802	23689803	cg26003813	PLK1
chr19	4769660	4769661	cg26005082	C19orf30
chr8	21987861	21987862	cg26045434	HR
chr12	107349093	107349094	cg26297688	C12orf23
chr1	36039159	36039160	cg26372517	TFAP2E
chr22	43506021	43506022	cg26453588	BIK
chr6	152958489	152958490	cg26620959	SYNE1
chr19	16436122	16436123	cg26842024	KLF2
chr6	158243833	158243834	cg26845300	SNX9
chr5	175792880	175792881	cg27092035	ARL10
chr15	83954229	83954230	cg27169020	BNC1
chr7	88389003	88389004	cg27319898	FLJ32110
chr19	7446301	7446302	cg27377450	ARHGEF18
chr4	83812148	83812149	cg27413543	SEC31L1
chr15	41805868	41805869	cg27494383	LTK

## Sheet: Histone Mark Accessions
File.accession	File.format	Assay	Assembly	Lab	Biosample.term.name	Output.type	File.Status	Experiment.accession	type	simplified	MARK
ENCFF598TVO	bam	ChIP-seq	hg19	ENCODE Processing Pipeline	adrenal gland	alignments	released	ENCSR086QZY	adult	adrenal_gland	H3K27ac
ENCFF062XGN	bam	ChIP-seq	hg19	ENCODE Processing Pipeline	adrenal gland	alignments	released	ENCSR094VJC	adult	adrenal_gland	H3K27ac
ENCFF150HRE	bam	ChIP-seq	hg19	ENCODE Processing Pipeline	adrenal gland	alignments	released	ENCSR177QFY	adult	adrenal_gland	H3K27ac
ENCFF521ZHZ	bam	ChIP-seq	hg19	ENCODE Processing Pipeline	adrenal gland	alignments	released	ENCSR177QFY	adult	adrenal_gland	H3K27ac
ENCFF070MRW	bam	ChIP-seq	hg19	ENCODE Processing Pipeline	adrenal gland	alignments	released	ENCSR189QAD	adult	adrenal_gland	H3K27ac
ENCFF916YRN	bam	ChIP-seq	hg19	ENCODE Processing Pipeline	adrenal gland	alignments	released	ENCSR405ESP	adult	adrenal_gland	H3K27ac
ENCFF718RYE	bam	ChIP-seq	hg19	ENCODE Processing Pipeline	adrenal gland	alignments	released	ENCSR642HHF	adult	adrenal_gland	H3K27ac
ENCFF639QXV	bam	ChIP-seq	hg19	ENCODE Processing Pipeline	adrenal gland	alignments	released	ENCSR847AIA	embryo	adrenal_gland	H3K27ac
ENCFF195YMX	bam	ChIP-seq	hg19	ENCODE Processing Pipeline	small intestine	alignments	released	ENCSR543CPW	adult	intestine	H3K27ac
ENCFF943RFS	bam	ChIP-seq	hg19	ENCODE Processing Pipeline	small intestine	alignments	released	ENCSR655XLM	adult	intestine	H3K27ac
ENCFF805JFJ	bam	ChIP-seq	hg19	ENCODE Processing Pipeline	large intestine	alignments	released	ENCSR659RHV	embryo	intestine	H3K27ac
ENCFF618QIM	bam	ChIP-seq	hg19	ENCODE Processing Pipeline	small intestine	alignments	released	ENCSR892XFG	embryo	intestine	H3K27ac
ENCFF239PAA	bam	ChIP-seq	hg19	ENCODE Processing Pipeline	psoas muscle	alignments	released	ENCSR250NHD	adult	muscle	H3K27ac
ENCFF965NGY	bam	ChIP-seq	hg19	ENCODE Processing Pipeline	gastrocnemius medialis	alignments	released	ENCSR601VHO	adult	muscle	H3K27ac
ENCFF283UZD	bam	ChIP-seq	hg19	ENCODE Processing Pipeline	gastrocnemius medialis	alignments	released	ENCSR736ALU	adult	muscle	H3K27ac
ENCFF105HMV	bam	ChIP-seq	hg19	ENCODE Processing Pipeline	gastrocnemius medialis	alignments	released	ENCSR736ALU	adult	muscle	H3K27ac
ENCFF947JJX	bam	ChIP-seq	hg19	ENCODE Processing Pipeline	psoas muscle	alignments	released	ENCSR791ISZ	adult	muscle	H3K27ac
ENCFF220TNE	bam	ChIP-seq	hg19	ENCODE Processing Pipeline	gastrocnemius medialis	alignments	released	ENCSR801IPH	adult	muscle	H3K27ac
ENCFF040TJZ	bam	ChIP-seq	hg19	ENCODE Processing Pipeline	gastrocnemius medialis	alignments	released	ENCSR801IPH	adult	muscle	H3K27ac
ENCFF224YOO	bam	ChIP-seq	hg19	ENCODE Processing Pipeline	gastrocnemius medialis	alignments	released	ENCSR948YYZ	adult	muscle	H3K27ac
ENCFF105LMV	bam	ChIP-seq	hg19	ENCODE Processing Pipeline	gastrocnemius medialis	alignments	released	ENCSR948YYZ	adult	muscle	H3K27ac
ENCFF715SUA	bam	ChIP-seq	hg19	ENCODE Processing Pipeline	muscle of leg	alignments	released	ENCSR687ZCM	embryo	muscle	H3K27ac
ENCFF994MOQ	bam	ChIP-seq	hg19	ENCODE Processing Pipeline	muscle of trunk	alignments	released	ENCSR775FTU	embryo	muscle	H3K27ac
ENCFF107IFK	bam	ChIP-seq	hg19	ENCODE Processing Pipeline	stomach	alignments	released	ENCSR001SHB	adult	stomach	H3K27ac
ENCFF925XNY	bam	ChIP-seq	hg19	ENCODE Processing Pipeline	stomach	alignments	released	ENCSR133NBJ	adult	stomach	H3K27ac
ENCFF710FQT	bam	ChIP-seq	hg19	ENCODE Processing Pipeline	stomach	alignments	released	ENCSR204OJS	adult	stomach	H3K27ac
ENCFF046QRA	bam	ChIP-seq	hg19	ENCODE Processing Pipeline	stomach	alignments	released	ENCSR582UTE	adult	stomach	H3K27ac
ENCFF091NPG	bam	ChIP-seq	hg19	ENCODE Processing Pipeline	stomach	alignments	released	ENCSR751BHO	adult	stomach	H3K27ac
ENCFF166CLO	bam	ChIP-seq	hg19	ENCODE Processing Pipeline	stomach	alignments	released	ENCSR944KAZ	adult	stomach	H3K27ac
ENCFF386QCT	bam	ChIP-seq	hg19	ENCODE Processing Pipeline	stomach	alignments	released	ENCSR743DDX	embryo	stomach	H3K27ac
ENCFF083ODT	bam	ChIP-seq	hg19	ENCODE Processing Pipeline	heart right ventricle	alignments	released	ENCSR068CQX	adult	heart	H3K27me3
ENCFF948FOJ	bam	ChIP-seq	hg19	ENCODE Processing Pipeline	ascending aorta	alignments	released	ENCSR103QHX	adult	heart	H3K27me3
ENCFF283VDL	bam	ChIP-seq	hg19	ENCODE Processing Pipeline	aorta	alignments	released	ENCSR128VHV	adult	heart	H3K27me3
ENCFF916JCU	bam	ChIP-seq	hg19	ENCODE Processing Pipeline	aorta	alignments	released	ENCSR196PGM	adult	heart	H3K27me3
ENCFF101PXI	bam	ChIP-seq	hg19	ENCODE Processing Pipeline	right atrium auricular region	alignments	released	ENCSR459CKR	adult	heart	H3K27me3
ENCFF411ZSE	bam	ChIP-seq	hg19	ENCODE Processing Pipeline	heart left ventricle	alignments	released	ENCSR503YOF	adult	heart	H3K27me3
ENCFF918UGT	bam	ChIP-seq	hg19	ENCODE Processing Pipeline	ascending aorta	alignments	released	ENCSR589GII	adult	heart	H3K27me3
ENCFF254FHP	bam	ChIP-seq	hg19	ENCODE Processing Pipeline	heart left ventricle	alignments	released	ENCSR613PPL	adult	heart	H3K27me3
ENCFF609FSU	bam	ChIP-seq	hg19	ENCODE Processing Pipeline	right atrium auricular region	alignments	released	ENCSR793PLF	adult	heart	H3K27me3
ENCFF334HSI	bam	ChIP-seq	hg19	ENCODE Processing Pipeline	thoracic aorta	alignments	released	ENCSR939RLS	adult	heart	H3K27me3
ENCFF574MYW	bam	ChIP-seq	hg19	ENCODE Processing Pipeline	thoracic aorta	alignments	released	ENCSR939RLS	adult	heart	H3K27me3
ENCFF188NOH	bam	ChIP-seq	hg19	ENCODE Processing Pipeline	right cardiac atrium	alignments	released	ENCSR972RKX	adult	heart	H3K27me3
ENCFF480ERS	bam	ChIP-seq	hg19	ENCODE Processing Pipeline	heart left ventricle	alignments	released	ENCSR988JLN	adult	heart	H3K27me3
ENCFF484EGJ	bam	ChIP-seq	hg19	ENCODE Processing Pipeline	heart	alignments	released	ENCSR281JXC	embryo	heart	H3K27me3
ENCFF091XPA	bam	ChIP-seq	hg19	ENCODE Processing Pipeline	small intestine	alignments	released	ENCSR877PAS	adult	intestine	H3K27me3
ENCFF902FFS	bam	ChIP-seq	hg19	ENCODE Processing Pipeline	large intestine	alignments	released	ENCSR157FDN	embryo	intestine	H3K27me3
ENCFF174UAO	bam	ChIP-seq	hg19	ENCODE Processing Pipeline	large intestine	alignments	released	ENCSR157FDN	embryo	intestine	H3K27me3
ENCFF387ZGN	bam	ChIP-seq	hg19	ENCODE Processing Pipeline	small intestine	alignments	released	ENCSR859EIX	embryo	intestine	H3K27me3
ENCFF808YRG	bam	ChIP-seq	hg19	ENCODE Processing Pipeline	adrenal gland	alignments	released	ENCSR181JFC	adult	kidney	H3K27me3
ENCFF956AVR	bam	ChIP-seq	hg19	ENCODE Processing Pipeline	adrenal gland	alignments	released	ENCSR218BPG	embryo	kidney	H3K27me3
ENCFF124ODW	bam	ChIP-seq	hg19	ENCODE Processing Pipeline	kidney	alignments	released	ENCSR761KZV	embryo	kidney	H3K27me3
ENCFF041AQF	bam	ChIP-seq	hg19	ENCODE Processing Pipeline	upper lobe of left lung	alignments	released	ENCSR050LBS	adult	lung	H3K27me3
ENCFF944ISC	bam	ChIP-seq	hg19	ENCODE Processing Pipeline	lung	alignments	released	ENCSR204NFO	adult	lung	H3K27me3
ENCFF092NLW	bam	ChIP-seq	hg19	ENCODE Processing Pipeline	upper lobe of left lung	alignments	released	ENCSR469YCE	adult	lung	H3K27me3
ENCFF053IEG	bam	ChIP-seq	hg19	ENCODE Processing Pipeline	upper lobe of left lung	alignments	released	ENCSR706OFD	adult	lung	H3K27me3
ENCFF297OPE	bam	ChIP-seq	hg19	ENCODE Processing Pipeline	upper lobe of left lung	alignments	released	ENCSR859MXQ	adult	lung	H3K27me3
ENCFF133ZMV	bam	ChIP-seq	hg19	ENCODE Processing Pipeline	lung	alignments	released	ENCSR111KKC	embryo	lung	H3K27me3
ENCFF803QNX	bam	ChIP-seq	hg19	ENCODE Processing Pipeline	lung	alignments	released	ENCSR727VOB	embryo	lung	H3K27me3
ENCFF911FUL	bam	ChIP-seq	hg19	ENCODE Processing Pipeline	gastrocnemius medialis	alignments	released	ENCSR201OSX	adult	muscle	H3K27me3
ENCFF789JPQ	bam	ChIP-seq	hg19	ENCODE Processing Pipeline	gastrocnemius medialis	alignments	released	ENCSR423LXQ	adult	muscle	H3K27me3
ENCFF022RSG	bam	ChIP-seq	hg19	ENCODE Processing Pipeline	gastrocnemius medialis	alignments	released	ENCSR453MSI	adult	muscle	H3K27me3
ENCFF960NFT	bam	ChIP-seq	hg19	ENCODE Processing Pipeline	gastrocnemius medialis	alignments	released	ENCSR453MSI	adult	muscle	H3K27me3
ENCFF271PHI	bam	ChIP-seq	hg19	ENCODE Processing Pipeline	gastrocnemius medialis	alignments	released	ENCSR519WQH	adult	muscle	H3K27me3
ENCFF451FSO	bam	ChIP-seq	hg19	ENCODE Processing Pipeline	gastrocnemius medialis	alignments	released	ENCSR519WQH	adult	muscle	H3K27me3
ENCFF327PED	bam	ChIP-seq	hg19	ENCODE Processing Pipeline	psoas muscle	alignments	released	ENCSR720SAS	adult	muscle	H3K27me3
ENCFF902FOL	bam	ChIP-seq	hg19	ENCODE Processing Pipeline	muscle of trunk	alignments	released	ENCSR686PTV	embryo	muscle	H3K27me3
ENCFF918LQK	bam	ChIP-seq	hg19	ENCODE Processing Pipeline	muscle of leg	alignments	released	ENCSR954ZUG	embryo	muscle	H3K27me3
ENCFF719RBU	bam	ChIP-seq	hg19	ENCODE Processing Pipeline	stomach	alignments	released	ENCSR227DGG	adult	stomach	H3K27me3
ENCFF750ZGI	bam	ChIP-seq	hg19	ENCODE Processing Pipeline	stomach	alignments	released	ENCSR330MAM	adult	stomach	H3K27me3
ENCFF767GNV	bam	ChIP-seq	hg19	ENCODE Processing Pipeline	stomach	alignments	released	ENCSR357ROS	adult	stomach	H3K27me3
ENCFF017GGC	bam	ChIP-seq	hg19	ENCODE Processing Pipeline	stomach	alignments	released	ENCSR527BFF	adult	stomach	H3K27me3
ENCFF982TBD	bam	ChIP-seq	hg19	ENCODE Processing Pipeline	stomach	alignments	released	ENCSR354IST	embryo	stomach	H3K27me3
ENCFF507PBS	bam	ChIP-seq	hg19	ENCODE Processing Pipeline	adrenal gland	alignments	released	ENCSR053PIY	adult	adrenal_gland	H3K9me3
ENCFF563LGZ	bam	ChIP-seq	hg19	ENCODE Processing Pipeline	adrenal gland	alignments	released	ENCSR053PIY	adult	adrenal_gland	H3K9me3
ENCFF754CMR	bam	ChIP-seq	hg19	ENCODE Processing Pipeline	adrenal gland	alignments	released	ENCSR408ZEW	adult	adrenal_gland	H3K9me3
ENCFF260ZYJ	bam	ChIP-seq	hg19	ENCODE Processing Pipeline	adrenal gland	alignments	released	ENCSR613FYP	adult	adrenal_gland	H3K9me3
ENCFF851JNW	bam	ChIP-seq	hg19	ENCODE Processing Pipeline	adrenal gland	alignments	released	ENCSR992VZG	adult	adrenal_gland	H3K9me3
ENCFF839YMP	bam	ChIP-seq	hg19	ENCODE Processing Pipeline	adrenal gland	alignments	released	ENCSR651IVN	embryo	adrenal_gland	H3K9me3
ENCFF890IWF	bam	ChIP-seq	hg19	ENCODE Processing Pipeline	right lobe of liver	alignments	released	ENCSR614JFD	adult	brain	H3K9me3
ENCFF197XTF	bam	ChIP-seq	hg19	ENCODE Processing Pipeline	brain	alignments	released	ENCSR018OGF	embryo	brain	H3K9me3
ENCFF723RFY	bam	ChIP-seq	hg19	ENCODE Processing Pipeline	brain	alignments	released	ENCSR829NJE	embryo	brain	H3K9me3
ENCFF183ZML	bam	ChIP-seq	hg19	ENCODE Processing Pipeline	heart left ventricle	alignments	released	ENCSR000XAA	adult	heart	H3K9me3
ENCFF530ZFH	bam	ChIP-seq	hg19	ENCODE Processing Pipeline	aorta	alignments	released	ENCSR065ZNA	adult	heart	H3K9me3
ENCFF856HZH	bam	ChIP-seq	hg19	ENCODE Processing Pipeline	heart left ventricle	alignments	released	ENCSR176KNR	adult	heart	H3K9me3
ENCFF250GAH	bam	ChIP-seq	hg19	ENCODE Processing Pipeline	right atrium auricular region	alignments	released	ENCSR250AAV	adult	heart	H3K9me3
ENCFF367FQO	bam	ChIP-seq	hg19	ENCODE Processing Pipeline	right atrium auricular region	alignments	released	ENCSR392WQN	adult	heart	H3K9me3
ENCFF653FGH	bam	ChIP-seq	hg19	ENCODE Processing Pipeline	ascending aorta	alignments	released	ENCSR441YQA	adult	heart	H3K9me3
ENCFF440KXT	bam	ChIP-seq	hg19	ENCODE Processing Pipeline	right cardiac atrium	alignments	released	ENCSR596BHN	adult	heart	H3K9me3
ENCFF849HQL	bam	ChIP-seq	hg19	ENCODE Processing Pipeline	ascending aorta	alignments	released	ENCSR723IKM	adult	heart	H3K9me3
ENCFF260HYU	bam	ChIP-seq	hg19	ENCODE Processing Pipeline	heart left ventricle	alignments	released	ENCSR803MVC	adult	heart	H3K9me3
ENCFF165USL	bam	ChIP-seq	hg19	ENCODE Processing Pipeline	thoracic aorta	alignments	released	ENCSR909VUB	adult	heart	H3K9me3
ENCFF222UIR	bam	ChIP-seq	hg19	ENCODE Processing Pipeline	thoracic aorta	alignments	released	ENCSR909VUB	adult	heart	H3K9me3
ENCFF152RUF	bam	ChIP-seq	hg19	ENCODE Processing Pipeline	thoracic aorta	alignments	released	ENCSR974OMC	adult	heart	H3K9me3
ENCFF767EEV	bam	ChIP-seq	hg19	ENCODE Processing Pipeline	heart	alignments	released	ENCSR712WTM	embryo	heart	H3K9me3
ENCFF432OYH	bam	ChIP-seq	hg19	ENCODE Processing Pipeline	small intestine	alignments	released	ENCSR270VNK	adult	intestine	H3K9me3
ENCFF983YGX	bam	ChIP-seq	hg19	ENCODE Processing Pipeline	large intestine	alignments	released	ENCSR591JZS	embryo	intestine	H3K9me3
ENCFF007YGP	bam	ChIP-seq	hg19	ENCODE Processing Pipeline	small intestine	alignments	released	ENCSR773TWR	embryo	intestine	H3K9me3
ENCFF298WEK	bam	ChIP-seq	hg19	ENCODE Processing Pipeline	upper lobe of left lung	alignments	released	ENCSR038ODI	adult	lung	H3K9me3
ENCFF370KSR	bam	ChIP-seq	hg19	ENCODE Processing Pipeline	upper lobe of left lung	alignments	released	ENCSR623YMO	adult	lung	H3K9me3
ENCFF700PWL	bam	ChIP-seq	hg19	ENCODE Processing Pipeline	upper lobe of left lung	alignments	released	ENCSR714FDJ	adult	lung	H3K9me3
ENCFF611DHC	bam	ChIP-seq	hg19	ENCODE Processing Pipeline	lung	alignments	released	ENCSR728FLA	adult	lung	H3K9me3
ENCFF272DAJ	bam	ChIP-seq	hg19	ENCODE Processing Pipeline	upper lobe of left lung	alignments	released	ENCSR759RTY	adult	lung	H3K9me3
ENCFF189KTK	bam	ChIP-seq	hg19	ENCODE Processing Pipeline	lung	alignments	released	ENCSR322BLC	embryo	lung	H3K9me3
ENCFF048ZHL	bam	ChIP-seq	hg19	ENCODE Processing Pipeline	lung	alignments	released	ENCSR454WZX	embryo	lung	H3K9me3
ENCFF163PLN	bam	ChIP-seq	hg19	ENCODE Processing Pipeline	gastrocnemius medialis	alignments	released	ENCSR283BRU	adult	muscle	H3K9me3
ENCFF354NVJ	bam	ChIP-seq	hg19	ENCODE Processing Pipeline	gastrocnemius medialis	alignments	released	ENCSR283BRU	adult	muscle	H3K9me3
ENCFF005CCC	bam	ChIP-seq	hg19	ENCODE Processing Pipeline	gastrocnemius medialis	alignments	released	ENCSR697RIW	adult	muscle	H3K9me3
ENCFF059EWP	bam	ChIP-seq	hg19	ENCODE Processing Pipeline	gastrocnemius medialis	alignments	released	ENCSR697RIW	adult	muscle	H3K9me3
ENCFF295VMM	bam	ChIP-seq	hg19	ENCODE Processing Pipeline	gastrocnemius medialis	alignments	released	ENCSR899TDF	adult	muscle	H3K9me3
ENCFF693RDF	bam	ChIP-seq	hg19	ENCODE Processing Pipeline	gastrocnemius medialis	alignments	released	ENCSR922OXX	adult	muscle	H3K9me3
ENCFF208TNE	bam	ChIP-seq	hg19	ENCODE Processing Pipeline	gastrocnemius medialis	alignments	released	ENCSR922OXX	adult	muscle	H3K9me3
ENCFF255NJI	bam	ChIP-seq	hg19	ENCODE Processing Pipeline	muscle of trunk	alignments	released	ENCSR183LNU	embryo	muscle	H3K9me3
ENCFF203QYU	bam	ChIP-seq	hg19	ENCODE Processing Pipeline	muscle of leg	alignments	released	ENCSR834BXU	embryo	muscle	H3K9me3
ENCFF872XNC	bam	ChIP-seq	hg19	ENCODE Processing Pipeline	muscle of leg	alignments	released	ENCSR834BXU	embryo	muscle	H3K9me3
ENCFF577XOG	bam	ChIP-seq	hg19	ENCODE Processing Pipeline	stomach	alignments	released	ENCSR475TRZ	adult	stomach	H3K9me3
ENCFF458URF	bam	ChIP-seq	hg19	ENCODE Processing Pipeline	stomach	alignments	released	ENCSR503XFW	adult	stomach	H3K9me3
ENCFF326DFZ	bam	ChIP-seq	hg19	ENCODE Processing Pipeline	stomach	alignments	released	ENCSR546HZF	adult	stomach	H3K9me3
ENCFF608FAJ	bam	ChIP-seq	hg19	ENCODE Processing Pipeline	stomach	alignments	released	ENCSR639RKZ	adult	stomach	H3K9me3
ENCFF843LJB	bam	ChIP-seq	hg19	ENCODE Processing Pipeline	stomach	alignments	released	ENCSR787TQW	adult	stomach	H3K9me3
ENCFF446XAV	bam	ChIP-seq	hg19	ENCODE Processing Pipeline	stomach	alignments	released	ENCSR447GWQ	embryo	stomach	H3K9me3

## Sheet: FETALBIASED - GREAT
Ontology	GO.ID	Term	Binomial.Raw.P.Value	Binomial.FDR.Q.Val	Binomial.Fold.Enrichment	Raw.Hyper.P.value	Hyper.FDR.Q.Val	Hyper.Fold.Enrichment
Ensembl Genes	5931	ZFP36L1	8.07142e-65	1.49717e-60	3.15655	0.959189	1	1.04255
	5930	RAD51B	4.48238e-59	4.15719e-55	3.25178	0.959189	1	1.04255
	16738	TRAF3IP2	4.30219e-50	2.66004e-46	4.58781	0.959189	1	1.04255
	1966	IRF2BP2	8.72354e-47	4.04532e-43	3.5557	0.959189	1	1.04255
	6807	PGPEP1L	2.5515e-44	9.46555e-41	4.01706	0.959189	1	1.04255
	18990	FANCC	9.0453e-43	2.79635e-39	3.164	0.959189	1	1.04255
	892	TGFBR3	1.18592e-40	3.14252e-37	3.87385	0.959189	1	1.04255
	8581	CCDC182	2.83162e-40	6.56546e-37	3.39573	0.959189	1	1.04255
	8580	MSI2	2.60873e-39	5.3766e-36	3.21367	0.959189	1	1.04255
	2090	KLF6	2.68256e-39	4.97588e-36	2.3154	0.959189	1	1.04255
	10973	SPTBN1	5.37274e-39	9.05991e-36	3.73855	0.959189	1	1.04255
	18989	C9orf3	3.0866e-38	4.77111e-35	3.14988	0.959189	1	1.04255
	777	ROR1	4.96415e-38	7.08308e-35	3.35106	0.959189	1	1.04255
	2457	ZMIZ1	8.67049e-38	1.14878e-34	2.46807	0.959189	1	1.04255
	14882	MGST2	1.19618e-37	1.4792e-34	3.29649	0.959189	1	1.04255
	2140	FRMD4A	2.40428e-37	2.78731e-34	2.47654	0.959189	1	1.04255
	12911	MN1	2.70365e-37	2.95e-34	2.57098	0.959189	1	1.04255
	15041	SORBS2	3.26295e-37	3.36247e-34	3.45233	0.959189	1	1.04255
	891	CDC7	9.37895e-37	9.15632e-34	3.57927	0.959189	1	1.04255
	3149	NAV2	1.53255e-36	1.42136e-33	2.74449	0.959189	1	1.04255
	14252	HES1	2.14823e-36	1.8975e-33	2.94671	0.959189	1	1.04255
	14883	MAML3	2.15195e-36	1.81439e-33	3.03076	0.959189	1	1.04255
	12783	MICAL3	1.90283e-35	1.53459e-32	4.38202	0.959189	1	1.04255
	16739	FYN	2.62355e-35	2.02767e-32	3.6417	0.959189	1	1.04255
	13376	CTDSPL	4.70912e-35	3.49398e-32	3.34442	0.959189	1	1.04255
	15040	PDLIM3	8.98037e-35	6.4068e-32	3.47886	0.959189	1	1.04255
	2456	RPS24	1.81196e-33	1.24481e-30	2.56299	0.959189	1	1.04255
	9120	ALPK2	2.99514e-33	1.98418e-30	3.06326	0.959189	1	1.04255
	5492	RNF113B	7.65128e-33	4.89392e-30	3.76345	0.959189	1	1.04255
	11399	MGAT5	3.57914e-32	2.21298e-29	2.41569	0.959189	1	1.04255
GO Biological Process	GO:0072359	circulatory system development	0	0	1.24247	1.2302e-09	6.61385e-07	1.03595
	GO:0048646	anatomical structure formation involved in morphogenesis	0	0	1.24638	1.32725e-08	4.62853e-06	1.03365
	GO:0001944	vasculature development	0	0	1.3036	2.88714e-06	0.000321145	1.03602
	GO:0001568	blood vessel development	0	0	1.30455	6.68448e-06	0.000648495	1.03569
	GO:0072358	cardiovascular system development	0	0	1.29498	2.07443e-06	0.000243331	1.03614
	GO:0022603	regulation of anatomical structure morphogenesis	1.63177e-287	3.50912e-284	1.20276	9.59469e-11	9.5231e-08	1.03493
	GO:0035295	tube development	2.18682e-277	4.03094e-274	1.25108	2.78251e-08	7.47972e-06	1.03873
	GO:0030036	actin cytoskeleton organization	2.75409e-274	4.44201e-271	1.34686	0.000134789	0.0077297	1.03252
	GO:0051270	regulation of cellular component movement	4.98173e-271	7.14214e-268	1.21173	7.06235e-09	2.93953e-06	1.03384
	GO:0030334	regulation of cell migration	5.4837e-265	7.07562e-262	1.22518	2.15693e-08	6.4723e-06	1.03523
	GO:0030029	actin filament-based process	4.74895e-264	5.57052e-261	1.30599	5.14935e-05	0.0033899	1.03187
	GO:0030155	regulation of cell adhesion	1.23922e-258	1.33247e-255	1.24777	9.49857e-07	0.000139273	1.03294
	GO:0048514	blood vessel morphogenesis	8.15918e-249	8.0983e-246	1.29635	0.000119937	0.00709883	1.03421
	GO:0040012	regulation of locomotion	1.27816e-248	1.17801e-245	1.20439	8.12803e-09	3.17806e-06	1.0338
	GO:0009887	animal organ morphogenesis	2.03505e-246	1.75055e-243	1.18784	1.53062e-08	5.06401e-06	1.03286
	GO:0051272	positive regulation of cellular component movement	5.21759e-246	4.20766e-243	1.29088	8.61683e-06	0.000805673	1.03558
	GO:2000145	regulation of cell motility	2.1465e-245	1.62919e-242	1.21094	1.67255e-08	5.39524e-06	1.03439
	GO:0040017	positive regulation of locomotion	7.886e-241	5.65295e-238	1.28211	4.16298e-06	0.000433185	1.03588
	GO:2000147	positive regulation of cell motility	8.76921e-235	5.95522e-232	1.28656	1.23683e-05	0.00107106	1.03542
	GO:0030335	positive regulation of cell migration	3.42615e-234	2.21038e-231	1.29046	2.36073e-05	0.00179179	1.03512
	GO:0009790	embryo development	1.21879e-232	7.48862e-230	1.18468	1.47746e-08	5.01676e-06	1.03219
	GO:0000122	negative regulation of transcription from RNA polymerase II promoter	3.41639e-229	2.00371e-226	1.20207	1.52374e-07	2.97891e-05	1.03203
	GO:0007010	cytoskeleton organization	6.01676e-222	3.3754e-219	1.20935	1.02393e-07	2.23928e-05	1.03023
	GO:0051056	regulation of small GTPase mediated signal transduction	7.22805e-222	3.88598e-219	1.3407	0.000228816	0.0115329	1.03582
	GO:0009792	embryo development ending in birth or egg hatching	1.37797e-221	7.11197e-219	1.2411	9.04695e-07	0.000134176	1.0351
	GO:1901701	cellular response to oxygen-containing compound	2.36699e-221	1.17466e-218	1.20249	3.49605e-07	6.26522e-05	1.02969
	GO:0007507	heart development	4.55815e-220	2.17829e-217	1.24368	4.64475e-06	0.000479449	1.03584
	GO:0043009	chordate embryonic development	2.28518e-219	1.05306e-216	1.24059	1.08252e-06	0.000150191	1.03503
	GO:0009611	response to wounding	1.79981e-216	8.0079e-214	1.27273	0.00912958	0.173745	1.01997
	GO:1902533	positive regulation of intracellular signal transduction	1.08291e-213	4.6576e-211	1.19432	6.45731e-10	3.96756e-07	1.03379
GO Cellular Component	GO:0070161	anchoring junction	0	0	1.34279	7.41978e-08	4.11798e-05	1.03855
	GO:0005912	adherens junction	0	0	1.34616	1.44091e-07	4.79822e-05	1.03842
	GO:0015629	actin cytoskeleton	0	0	1.40858	0.00384585	0.0711482	1.0243
	GO:0005924	cell-substrate adherens junction	0	0	1.42224	9.96337e-07	0.000103681	1.03992
	GO:0005925	focal adhesion	0	0	1.42241	1.12387e-06	0.000110073	1.0399
	GO:0030055	cell-substrate junction	1.50708e-303	4.18216e-301	1.39731	8.4842e-07	0.000108663	1.03995
	GO:0099081	supramolecular polymer	1.76984e-168	4.20968e-166	1.19984	1	1	0.962263
	GO:0099080	supramolecular complex	2.48699e-168	5.17605e-166	1.19973	1	1	0.962351
	GO:0099512	supramolecular fiber	6.70507e-165	1.24044e-162	1.19904	1	1	0.96164
	GO:0001726	ruffle	1.7988e-159	2.99501e-157	1.45444	0.00871356	0.124001	1.03615
	GO:0001725	stress fiber	4.01171e-152	6.07228e-150	1.78768	0.367616	1	1.0225
	GO:0032432	actin filament bundle	1.7644e-137	2.4481e-135	1.68912	0.308913	1	1.02457
	GO:0042641	actomyosin	5.43449e-137	6.96033e-135	1.65089	0.258157	1	1.02626
	GO:0030016	myofibril	1.22863e-134	1.46119e-132	1.34778	0.120757	0.855574	1.01841
	GO:0031252	cell leading edge	8.70732e-134	9.66512e-132	1.24857	3.31157e-06	0.000239729	1.03971
	GO:0043292	contractile fiber	1.46815e-133	1.5278e-131	1.34016	0.0944632	0.718179	1.01958
	GO:0048471	perinuclear region of cytoplasm	8.77298e-131	8.59236e-129	1.19592	3.18874e-06	0.00024133	1.03146
	GO:0005768	endosome	8.08177e-125	7.47564e-123	1.16847	3.42275e-06	0.000227955	1.02793
	GO:0005938	cell cortex	9.86638e-125	8.64606e-123	1.30243	0.00215351	0.0484539	1.03411
	GO:0044449	contractile fiber part	7.64795e-121	6.36692e-119	1.32923	0.131737	0.891633	1.01796
	GO:0099568	cytoplasmic region	1.01052e-120	8.012e-119	1.26996	0.000246036	0.00803236	1.03578
	GO:0030017	sarcomere	3.9842e-108	3.01532e-106	1.32005	0.187951	1	1.01581
	GO:0005911	cell-cell junction	7.58395e-107	5.49012e-105	1.19587	0.00383025	0.0724701	1.02525
	GO:0030027	lamellipodium	4.79971e-92	3.3298e-90	1.30243	0.00386555	0.0707268	1.03691
	GO:0005667	transcription factor complex	1.1248e-91	7.49114e-90	1.21655	2.60398e-05	0.00120434	1.03924
	GO:0032587	ruffle membrane	4.33379e-91	2.77529e-89	1.47209	0.0253367	0.283125	1.04255
	GO:0030864	cortical actin cytoskeleton	3.83261e-82	2.36344e-80	1.55642	0.0817502	0.654395	1.04255
	GO:0044440	endosomal part	7.28938e-82	4.33458e-80	1.18862	7.62244e-05	0.00270029	1.0316
	GO:0098562	cytoplasmic side of membrane	8.53944e-80	4.90281e-78	1.30481	0.0152985	0.188682	1.03151
	GO:0010008	endosome membrane	2.53382e-78	1.40627e-76	1.19382	7.36594e-05	0.00266615	1.03294
GO Molecular Function	GO:0008092	cytoskeletal protein binding	2.17909e-294	9.09117e-291	1.25414	2.93234e-07	8.15581e-05	1.03038
	GO:0032403	protein complex binding	3.36741e-264	7.02442e-261	1.27014	0.00416983	0.197688	1.01852
	GO:0044212	transcription regulatory region DNA binding	9.84889e-254	1.36965e-250	1.20894	1.86564e-13	2.59448e-10	1.04007
	GO:0000975	regulatory region DNA binding	1.31488e-253	1.37142e-250	1.20878	1.71784e-13	3.58341e-10	1.04008
	GO:0001067	regulatory region nucleic acid binding	4.60256e-253	3.84037e-250	1.20836	1.64838e-13	6.87702e-10	1.04008
	GO:0045296	cadherin binding	2.0426e-233	1.42029e-230	1.41587	4.01343e-05	0.00380546	1.03912
	GO:0003690	double-stranded DNA binding	5.07486e-222	3.02462e-219	1.20302	1.00716e-11	8.4037e-09	1.03867
	GO:0003779	actin binding	9.51895e-219	4.96414e-216	1.32255	0.00252172	0.129884	1.02695
	GO:0000988	transcription factor activity, protein binding	1.90599e-211	8.83535e-209	1.23879	1.64251e-05	0.00190349	1.03052
	GO:0000989	transcription factor activity, transcription factor binding	8.63831e-205	3.6039e-202	1.23625	2.11466e-05	0.00226214	1.03036
	GO:0019900	kinase binding	4.30758e-198	1.63375e-195	1.23805	1.08811e-06	0.000252199	1.03288
	GO:0008134	transcription factor binding	5.88941e-191	2.04755e-188	1.24173	2.4598e-06	0.00048868	1.03471
	GO:1990837	sequence-specific double-stranded DNA binding	4.63374e-188	1.48707e-185	1.19287	2.19891e-10	1.14673e-07	1.03825
	GO:0000976	transcription regulatory region sequence-specific DNA binding	8.95287e-182	2.66796e-179	1.19337	6.13792e-12	6.40185e-09	1.04103
	GO:0001012	RNA polymerase II regulatory region DNA binding	5.63136e-156	1.56627e-153	1.18977	1.45703e-10	1.01312e-07	1.04085
	GO:0003712	transcription cofactor activity	4.98666e-155	1.30027e-152	1.21702	0.000161462	0.0124744	1.02886
	GO:0000977	RNA polymerase II regulatory region sequence-specific DNA binding	9.83583e-155	2.41383e-152	1.18942	1.58308e-10	9.43515e-08	1.04084
	GO:0050839	cell adhesion molecule binding	2.22836e-154	5.16485e-152	1.24537	0.000123904	0.0101358	1.03124
	GO:0005085	guanyl-nucleotide exchange factor activity	2.68256e-154	5.89034e-152	1.2901	1.97593e-05	0.00216937	1.03931
	GO:0019901	protein kinase binding	1.0423e-152	2.17425e-150	1.22161	1.66314e-05	0.00187531	1.03148
	GO:0019838	growth factor binding	1.0019e-139	1.99044e-137	1.42227	0.00435675	0.204229	1.04255
	GO:0005088	Ras guanyl-nucleotide exchange factor activity	3.81132e-135	7.22765e-133	1.29589	3.03018e-05	0.00308339	1.04255
	GO:0000981	RNA polymerase II transcription factor activity, sequence-specific DNA binding	4.4134e-132	8.00552e-130	1.14963	4.6337e-10	2.14798e-07	1.03709
	GO:0008047	enzyme activator activity	2.01493e-129	3.50262e-127	1.2085	0.000370878	0.0257884	1.0281
	GO:0008289	lipid binding	1.98346e-125	3.30999e-123	1.1905	0.0130338	0.476993	1.01735
	GO:0019904	protein domain specific binding	1.16103e-121	1.86301e-119	1.17411	3.95458e-05	0.00383687	1.02757
	GO:0016773	phosphotransferase activity, alcohol group as acceptor	2.25896e-121	3.49051e-119	1.16074	1.18642e-06	0.000260513	1.03039
	GO:0051015	actin filament binding	2.96903e-121	4.42385e-119	1.41628	0.377417	1	1.00934
	GO:0000982	transcription factor activity, RNA polymerase II core promoter proximal region sequence-specific binding	6.03713e-119	8.68514e-117	1.18876	9.57111e-07	0.000234886	1.03993
	GO:0071889	14-3-3 protein binding	1.66333e-113	2.31313e-111	1.88554	0.352621	1	1.04255
Human Phenotype	HP:0002813	Abnormality of limb bone morphology	2.02758e-123	1.34672e-119	1.16241	9.557e-10	2.26706e-07	1.03695
	HP:0011297	Abnormality of digit	5.2116e-121	1.73077e-117	1.1709	7.85132e-09	1.58026e-06	1.03763
	HP:0011844	Abnormal appendicular skeleton morphology	1.95349e-117	4.32502e-114	1.15171	8.89859e-11	3.69403e-08	1.03738
	HP:0040068	Abnormality of limb bone	2.95941e-114	4.9141e-111	1.15393	5.6079e-10	1.4326e-07	1.03705
	HP:0030680	Abnormality of cardiovascular system morphology	1.1007e-111	1.46217e-108	1.16275	0.00159171	0.0487196	1.02066
	HP:0011121	Abnormality of skin morphology	3.80755e-104	4.21496e-101	1.15878	9.49804e-07	9.27735e-05	1.0305
	HP:0001627	Abnormal heart morphology	1.45437e-103	1.37999e-100	1.17065	0.000434365	0.0170713	1.02479
	HP:0002597	Abnormality of the vasculature	4.06124e-100	3.37184e-97	1.18069	0.0460125	0.595741	1.01442
	HP:0001871	Abnormality of blood and blood-forming tissues	1.86677e-97	1.37767e-94	1.18992	9.49857e-07	9.14341e-05	1.03294
	HP:0000153	Abnormality of the mouth	8.19525e-96	5.44328e-93	1.12341	4.93268e-12	3.27629e-09	1.03698
	HP:0001713	Abnormal cardiac ventricle morphology	1.45388e-93	8.77879e-91	1.25207	0.465192	1	1.00393
	HP:0001155	Abnormality of the hand	1.68619e-91	9.33306e-89	1.14783	3.0583e-07	3.62737e-05	1.03438
	HP:0007364	Aplasia/Hypoplasia of the cerebrum	3.71631e-91	1.89875e-88	1.1549	6.67367e-12	4.02968e-09	1.04103
	HP:0001671	Abnormality of the cardiac septa	3.91349e-91	1.85667e-88	1.24105	0.00493489	0.117482	1.0307
	HP:0001629	Ventricular septal defect	6.97711e-90	3.08946e-87	1.28343	0.0233035	0.37118	1.0307
	HP:0010438	Abnormal ventricular septum morphology	1.31577e-88	5.46208e-86	1.27828	0.0204909	0.343688	1.03096
	HP:0002977	Aplasia/Hypoplasia involving the central nervous system	2.71576e-87	1.06106e-84	1.13856	5.22542e-13	4.95817e-10	1.04
	HP:0025015	Abnormal vascular morphology	4.0058e-86	1.47814e-83	1.21966	0.345234	1	1.0066
	HP:0001760	Abnormality of the foot	2.25184e-85	7.87196e-83	1.14779	1.20465e-06	0.000108125	1.03283
	HP:0000951	Abnormality of the skin	2.68521e-85	8.91757e-83	1.13231	3.28451e-07	3.82732e-05	1.02972
	HP:0011025	Abnormality of cardiovascular system physiology	1.89608e-84	5.99704e-82	1.20103	0.0921878	0.94932	1.01385
	HP:0001780	Abnormality of toe	1.42433e-82	4.30018e-80	1.22457	0.00655977	0.146208	1.03028
	HP:0000978	Bruising susceptibility	8.9477e-82	2.58394e-79	1.54726	0.0721139	0.817373	1.04255
	HP:0000366	Abnormality of the nose	9.63502e-81	2.66649e-78	1.13206	9.69482e-13	8.04912e-10	1.04113
	HP:0011927	Short digit	1.35437e-80	3.5983e-78	1.22528	7.67053e-05	0.00371881	1.04255
	HP:0003549	Abnormality of connective tissue	2.06697e-80	5.28032e-78	1.15106	5.94672e-08	8.40386e-06	1.03718
	HP:0030962	Abnormal morphology of the great vessels	2.16792e-78	5.3331e-76	1.24295	0.00120491	0.0392303	1.03772
	HP:0011805	Abnormality of muscle morphology	2.39235e-75	5.67501e-73	1.14617	0.0060729	0.13909	1.01872
	HP:0000240	Abnormality of skull size	2.89495e-75	6.63044e-73	1.13323	4.27394e-14	5.6775e-11	1.04255
	HP:0001263	Global developmental delay	3.59095e-75	7.95036e-73	1.12878	1.48048e-14	2.45833e-11	1.04129
Mouse Phenotype	MP:0006207	embryonic lethality during organogenesis	0	0	1.281	1.32494e-11	2.08303e-08	1.03605
	MP:0002925	abnormal cardiovascular development	0	0	1.29235	8.56199e-11	8.07653e-08	1.03739
	MP:0005294	abnormal heart ventricle morphology	0	0	1.25146	1.25214e-07	2.00194e-05	1.03288
	MP:0010866	abnormal prenatal body size	0	0	1.28297	3.3359e-13	1.57338e-09	1.03904
	MP:0013693	abnormal hemopoiesis	0	0	1.2783	1.61637e-10	1.17286e-07	1.03413
	MP:0011098	embryonic lethality during organogenesis, complete penetrance	0	0	1.30736	1.79585e-08	4.34366e-06	1.03437
	MP:0002123	abnormal definitive hematopoiesis	0	0	1.25706	4.22393e-10	2.49027e-07	1.0339
	MP:0013659	abnormal erythroid lineage cell morphology	0	0	1.28088	4.62627e-07	6.14642e-05	1.02956
	MP:0001697	abnormal embryo size	0	0	1.30302	1.67044e-10	1.05048e-07	1.03829
	MP:0002086	abnormal extraembryonic tissue morphology	0	0	1.29218	5.04377e-09	1.64062e-06	1.0366
	MP:0000259	abnormal vascular development	0	0	1.32404	1.13157e-07	1.87265e-05	1.03702
	MP:0001698	decreased embryo size	0	0	1.308	1.11956e-09	4.59165e-07	1.03923
	MP:0010865	prenatal growth retardation	0	0	1.28705	1.13051e-07	1.9043e-05	1.03472
	MP:0000267	abnormal heart development	0	0	1.32055	1.18471e-05	0.000873079	1.0372
	MP:0001784	abnormal fluid regulation	1.38203e-307	8.6911e-305	1.23512	2.8099e-06	0.000262434	1.02863
	MP:0002132	abnormal respiratory system morphology	9.32944e-299	5.50029e-296	1.21355	4.67039e-09	1.57342e-06	1.03256
	MP:0006208	lethality throughout fetal growth and development	1.66625e-296	9.2457e-294	1.27872	1.02857e-06	0.000119784	1.03638
	MP:0003229	abnormal vitelline vasculature morphology	4.68993e-296	2.45778e-293	1.43116	6.2115e-05	0.00325517	1.04255
	MP:0002006	neoplasm	5.82181e-296	2.89038e-293	1.23454	1.65566e-10	1.11556e-07	1.03481
	MP:0002447	abnormal erythrocyte morphology	2.11932e-292	9.99577e-290	1.26442	8.574e-07	0.00010369	1.02988
	MP:0010545	abnormal heart layer morphology	3.16227e-288	1.42046e-285	1.28654	1.07804e-05	0.000813531	1.03404
	MP:0003984	embryonic growth retardation	4.97913e-284	2.13492e-281	1.29373	2.95255e-06	0.000267802	1.03345
	MP:0005329	abnormal myocardium layer morphology	2.42544e-281	9.94748e-279	1.28577	1.37514e-05	0.00100555	1.03391
	MP:0000703	abnormal thymus morphology	1.25354e-278	4.92694e-276	1.29059	0.429437	1	1.00258
	MP:0002135	abnormal kidney morphology	1.37328e-273	5.18164e-271	1.21417	5.65453e-10	2.80733e-07	1.03452
	MP:0000260	abnormal angiogenesis	1.48015e-273	5.37011e-271	1.29946	3.03089e-05	0.00194492	1.03499
	MP:0002128	abnormal blood circulation	3.23427e-273	1.12996e-270	1.22194	4.01513e-09	1.40277e-06	1.03567
	MP:0004939	abnormal B cell morphology	2.81527e-271	9.48445e-269	1.2656	0.258037	1	1.00579
	MP:0000516	abnormal renal/urinary system morphology	4.35666e-266	1.41712e-263	1.1984	2.86705e-11	3.86356e-08	1.03518
	MP:0006387	abnormal T cell number	2.47775e-261	7.79087e-259	1.22751	0.0917255	0.662517	1.00902

## Sheet: ADULTBIASED - GREAT
Ontology	GO.ID	Term	Binomial.Raw.P.Value	Binomial.FDR.Q.Val	Binomial.Fold.Enrichment	Raw.Hyper.P.value	Hyper.FDR.Q.Val	Hyper.Fold.Enrichment
Ensembl Genes	88	AJAP1	5.98143e-282	1.1095e-277	3.86049	0.972721	1	1.02804
	13177	FAM19A5	1.92124e-279	1.78185e-275	3.61712	0.972721	1	1.02804
	12456	CDH4	8.1183e-241	5.01954e-237	3.53709	0.972721	1	1.02804
	2814	GLRX3	4.81279e-205	2.23181e-201	4.0031	0.972721	1	1.02804
	520	GRIK3	1.06683e-189	3.95774e-186	4.18393	0.972721	1	1.02804
	17917	DNAJB6	1.2152e-185	3.75678e-182	3.78178	0.972721	1	1.02804
	17932	DLGAP2	6.28337e-184	1.665e-180	3.75327	0.972721	1	1.02804
	13180	BRD1	2.81779e-175	6.5334e-172	3.95309	0.972721	1	1.02804
	17919	PTPRN2	2.37287e-174	4.89048e-171	3.79284	0.972721	1	1.02804
	12458	TAF4	3.63333e-172	6.73947e-169	4.24151	0.972721	1	1.02804
	10693	MYT1L	1.53828e-170	2.59396e-167	3.23367	0.972721	1	1.02804
	2817	PPP2R2D	9.04625e-166	1.39833e-162	3.99368	0.972721	1	1.02804
	89	NPHP4	1.04731e-161	1.49434e-158	3.7697	0.972721	1	1.02804
	9190	SALL3	5.34579e-149	7.08279e-146	3.62754	0.972721	1	1.02804
	15091	IRX4	7.70933e-149	9.53336e-146	3.80831	0.972721	1	1.02804
	5538	SOX1	6.43834e-148	7.46405e-145	3.87371	0.972721	1	1.02804
	15094	IRX1	2.0329e-145	2.21813e-142	2.85686	0.972721	1	1.02804
	15092	IRX2	1.3522e-144	1.39344e-141	3.90734	0.972721	1	1.02804
	17930	TDRP	2.07681e-141	2.02751e-138	3.49639	0.972721	1	1.02804
	427	MATN1	1.28546e-139	1.1922e-136	3.5533	0.972721	1	1.02804
	251	IGSF21	2.49244e-139	2.20154e-136	4.1791	0.972721	1	1.02804
	11919	HDAC4	4.21e-136	3.5496e-133	3.35573	0.972721	1	1.02804
	10695	TRAPPC12	2.07515e-135	1.67357e-132	3.36334	0.972721	1	1.02804
	87	C1orf174	5.5847e-135	4.31628e-132	3.96337	0.972721	1	1.02804
	12423	BMP7	1.40744e-133	1.04426e-130	4.16501	0.972721	1	1.02804
	7825	WSCD1	5.04055e-129	3.59605e-126	3.74689	0.972721	1	1.02804
	12422	TFAP2C	6.84182e-129	4.70033e-126	3.99838	0.972721	1	1.02804
	3702	SHANK2	6.14246e-122	4.06916e-119	3.53234	0.972721	1	1.02804
	13175	TBC1D22A	2.01569e-121	1.28927e-118	3.36364	0.972721	1	1.02804
	5536	TEX29	1.03014e-117	6.36937e-115	3.68726	0.972721	1	1.02804
GO Biological Process	GO:0072272	proximal/distal pattern formation involved in metanephric nephron development	2.59595e-281	3.34956e-277	3.19271	0.946184	1	1.02804
	GO:0021937	cerebellar Purkinje cell-granule cell precursor cell signaling involved in regulation of granule cell precursor cell proliferation	4.24696e-271	2.73993e-267	2.99096	0.847071	1	1.02804
	GO:0044764	multi-organism cellular process	3.53416e-264	1.52004e-260	1.24056	0.110824	1	1.00865
	GO:0071705	nitrogen compound transport	7.1261e-262	2.2987e-258	1.24928	0.023901	0.851919	1.01431
	GO:0016032	viral process	6.12356e-256	1.58025e-252	1.23887	0.126216	1	1.00827
	GO:0098542	defense response to other organism	1.34795e-252	2.89877e-249	1.34334	0.418364	1	1.00327
	GO:0021940	positive regulation of cerebellar granule cell precursor proliferation	3.1536e-249	5.81299e-246	2.7384	0.801471	1	1.02804
	GO:0021936	regulation of cerebellar granule cell precursor proliferation	8.32383e-246	1.34253e-242	2.67376	0.758321	1	1.02804
	GO:0044419	interspecies interaction between organisms	1.48188e-245	2.12452e-242	1.22042	0.057857	1	1.01022
	GO:0044403	symbiosis, encompassing mutualism through parasitism	5.21017e-243	6.72269e-240	1.2195	0.0592851	1	1.01016
	GO:0002252	immune effector process	9.03449e-243	1.05975e-239	1.19711	1.9107e-07	0.000493076	1.02348
	GO:0072086	specification of loop of Henle identity	2.47315e-240	2.65926e-237	2.60067	0.89526	1	1.02804
	GO:0045087	innate immune response	9.26183e-223	9.19272e-220	1.25243	0.556465	1	1.00013
	GO:0031424	keratinization	3.59727e-214	3.3154e-211	1.70801	0.579313	1	1.00075
	GO:0002684	positive regulation of immune system process	1.35144e-212	1.16251e-209	1.16527	2.26778e-05	0.0100901	1.01998
	GO:2001242	regulation of intrinsic apoptotic signaling pathway	3.82763e-209	3.08675e-206	1.47673	0.201318	1	1.01478
	GO:2001053	regulation of mesenchymal cell apoptotic process	2.09141e-202	1.58738e-199	1.93716	0.71749	1	1.02804
	GO:0002076	osteoblast development	5.29644e-201	3.79667e-198	1.90983	0.624757	1	1.02804
	GO:0045109	intermediate filament organization	2.84906e-200	1.93481e-197	2.17252	0.574963	1	1.02804
	GO:1903867	extraembryonic membrane development	3.47701e-199	2.24319e-196	2.13724	0.779598	1	1.02804
	GO:0072268	pattern specification involved in metanephros development	1.79076e-198	1.10029e-195	2.354	0.89526	1	1.02804
	GO:0044571	[2Fe-2S] cluster assembly	8.39316e-195	4.92259e-192	3.82951	0.999921	1	0.514022
	GO:0030860	regulation of polarized epithelial cell differentiation	1.83626e-193	1.03014e-190	2.75611	0.920371	1	1.02804
	GO:0072136	metanephric mesenchymal cell proliferation involved in metanephros development	6.53437e-192	3.51304e-189	3.02109	0.920371	1	1.02804
	GO:0045321	leukocyte activation	9.09368e-191	4.69343e-188	1.16279	2.37451e-06	0.00218845	1.02211
	GO:0072081	specification of nephron tubule identity	1.22037e-185	6.05631e-183	2.16839	0.870833	1	1.02804
	GO:0048878	chemical homeostasis	6.85365e-184	3.27528e-181	1.14213	6.09745e-07	0.000874171	1.02248
	GO:0097428	protein maturation by iron-sulfur cluster transfer	1.87782e-182	8.65338e-180	3.29257	0.999349	1	0.734317
	GO:0015833	peptide transport	5.11863e-182	2.27744e-179	1.51974	0.121683	1	1.02804
	GO:0048871	multicellular organismal homeostasis	1.10422e-181	4.74924e-179	1.25681	0.109867	1	1.01357
GO Cellular Component	GO:0044214	spanning component of plasma membrane	1.27308e-253	2.11968e-250	3.33736	0.89526	1	1.02804
	GO:0005882	intermediate filament	1.26204e-203	1.05065e-200	1.64274	0.377721	1	1.00706
	GO:0000159	protein phosphatase type 2A complex	4.832e-186	2.68176e-183	1.95676	0.559262	1	1.02804
	GO:0101003	ficolin-1-rich granule membrane	1.07745e-184	4.4849e-182	1.8371	0.184535	1	1.02804
	GO:0005883	neurofilament	1.48496e-167	4.9449e-165	2.18575	0.823956	1	1.02804
	GO:0048471	perinuclear region of cytoplasm	2.75123e-166	7.63467e-164	1.16194	0.0023788	0.220039	1.01711
	GO:0005765	lysosomal membrane	2.61141e-163	6.21142e-161	1.27205	0.0142107	0.514367	1.0191
	GO:0005774	vacuolar membrane	3.77983e-160	7.86677e-158	1.2481	0.00503179	0.310293	1.02024
	GO:0060170	ciliary membrane	1.03841e-142	1.92106e-140	1.529	0.604455	1	1.00327
	GO:0098562	cytoplasmic side of membrane	1.3409e-142	2.23261e-140	1.30126	0.588169	1	1.00085
	GO:0030008	TRAPP complex	1.89688e-140	2.87118e-138	2.42317	0.945575	1	0.954612
	GO:0044437	vacuolar part	4.57146e-137	6.3429e-135	1.18779	0.00222624	0.231668	1.01872
	GO:0009898	cytoplasmic side of plasma membrane	8.10463e-137	1.03802e-134	1.30664	0.680491	1	0.997807
	GO:0045111	intermediate filament cytoskeleton	6.21924e-127	7.39645e-125	1.40227	0.241168	1	1.01024
	GO:0031526	brush border membrane	1.12003e-126	1.24324e-124	1.64157	0.243535	1	1.02804
	GO:0001917	photoreceptor inner segment	7.92551e-124	8.24748e-122	1.68746	0.910336	1	0.975324
	GO:0045095	keratin filament	1.97882e-121	1.93808e-119	2.26653	0.727261	1	0.996249
	GO:0099503	secretory vesicle	3.99597e-120	3.69627e-118	1.12812	2.22765e-06	0.00370904	1.02145
	GO:0097470	ribbon synapse	8.93634e-119	7.83105e-117	2.34783	0.870833	1	1.02804
	GO:0030141	secretory granule	6.67827e-118	5.55966e-116	1.13965	2.72948e-05	0.00908918	1.02054
	GO:0019814	immunoglobulin complex	2.38533e-116	1.89122e-114	2.24419	0.823956	1	1.02804
	GO:0043209	myelin sheath	1.99467e-113	1.5096e-111	1.31043	0.0606077	1	1.02174
	GO:1990425	ryanodine receptor complex	1.11067e-107	8.0403e-106	3.11201	0.920371	1	1.02804
	GO:0008287	protein serine/threonine phosphatase complex	2.22201e-104	1.54152e-102	1.50317	0.272105	1	1.02804
	GO:0044440	endosomal part	1.50139e-101	9.99924e-100	1.15408	0.000174383	0.0322609	1.02372
	GO:0005891	voltage-gated calcium channel complex	6.92524e-97	4.43482e-95	1.46036	0.312565	1	1.02804
	GO:0070776	MOZ/MORF histone acetyltransferase complex	1.54359e-96	9.51881e-95	2.23485	0.823956	1	1.02804
	GO:0019898	extrinsic component of membrane	3.05843e-96	1.81868e-94	1.19691	0.0729052	1	1.01618
	GO:0097730	non-motile cilium	3.93182e-94	2.2574e-92	1.30113	0.322734	1	1.01185
	GO:0005764	lysosome	9.83437e-93	5.45808e-91	1.13508	0.000842509	0.100198	1.01866
GO Molecular Function	GO:0008324	cation transmembrane transporter activity	1.1464e-251	4.78278e-248	1.19607	0.156226	1	1.00732
	GO:0022891	substrate-specific transmembrane transporter activity	2.77991e-203	5.79889e-200	1.14509	0.0398316	1	1.00951
	GO:0051082	unfolded protein binding	1.86953e-195	2.5999e-192	1.70609	0.840593	1	0.988881
	GO:0019888	protein phosphatase regulator activity	1.66473e-194	1.73631e-191	1.54271	0.36798	1	1.01486
	GO:0016810	hydrolase activity, acting on carbon-nitrogen (but not peptide) bonds	3.28646e-178	2.74222e-175	1.44404	0.433427	1	1.00692
	GO:0005261	cation channel activity	2.58828e-173	1.79971e-170	1.21484	0.0109298	1	1.02117
	GO:0099094	ligand-gated cation channel activity	7.72884e-172	4.60639e-169	1.46321	0.12511	1	1.02804
	GO:0015075	ion transmembrane transporter activity	1.63881e-171	8.5464e-169	1.13671	0.0502624	1	1.00933
	GO:0046873	metal ion transmembrane transporter activity	2.25571e-170	1.04565e-167	1.18283	0.00170684	0.508639	1.02111
	GO:0022890	inorganic cation transmembrane transporter activity	2.48829e-169	1.03812e-166	1.17019	0.264743	1	1.00553
	GO:0000981	RNA polymerase II transcription factor activity, sequence-specific DNA binding	2.62587e-168	9.95919e-166	1.12397	0.0692467	1	1.00921
	GO:0000975	regulatory region DNA binding	7.26226e-167	2.52485e-164	1.12279	0.0455392	1	1.00977
	GO:0044212	transcription regulatory region DNA binding	2.40678e-166	7.72392e-164	1.12265	0.0466148	1	1.00973
	GO:0001067	regulatory region nucleic acid binding	5.94447e-164	1.77145e-161	1.12157	0.0450095	1	1.00979
	GO:0003690	double-stranded DNA binding	8.03196e-151	2.23396e-148	1.12136	0.299026	1	1.00381
	GO:0030160	GKAP/Homer scaffold activity	1.78805e-150	4.66234e-148	3.3699	0.89526	1	1.02804
	GO:0001227	transcriptional repressor activity, RNA polymerase II transcription regulatory region sequence-specific binding	4.91221e-148	1.20551e-145	1.21349	0.0517384	1	1.01895
	GO:1990837	sequence-specific double-stranded DNA binding	1.85728e-143	4.30475e-141	1.12242	0.300307	1	1.00404
	GO:0034618	arginine binding	1.90182e-142	4.17599e-140	2.911	0.823956	1	1.02804
	GO:0020037	heme binding	1.15755e-139	2.41464e-137	1.42564	0.333182	1	1.0116
	GO:0005326	neurotransmitter transporter activity	8.66655e-139	1.72175e-136	1.95531	0.500621	1	1.02804
	GO:0000976	transcription regulatory region sequence-specific DNA binding	1.39427e-133	2.64403e-131	1.12037	0.152098	1	1.00716
	GO:0043121	neurotrophin binding	6.60831e-133	1.19869e-130	2.05976	0.758321	1	1.02804
	GO:0015185	gamma-aminobutyric acid transmembrane transporter activity	2.9377e-129	5.10671e-127	3.22898	0.870833	1	1.02804
	GO:0005245	voltage-gated calcium channel activity	4.3991e-126	7.34121e-124	1.52374	0.330383	1	1.02804
	GO:0000977	RNA polymerase II regulatory region sequence-specific DNA binding	1.62157e-124	2.602e-122	1.12356	0.144751	1	1.00785
	GO:0001025	RNA polymerase III transcription factor binding	3.70729e-124	5.72845e-122	2.47168	0.870833	1	1.02804
	GO:0005484	SNAP receptor activity	4.93223e-123	7.34902e-121	1.73352	0.330383	1	1.02804
	GO:0004000	adenosine deaminase activity	1.05631e-122	1.51963e-120	2.10606	0.737623	1	1.02804
	GO:0015085	calcium ion transmembrane transporter activity	1.62411e-122	2.2586e-120	1.27203	0.0249256	1	1.02804
Human Phenotype	HP:0000601	Hypotelorism	1.19129e-243	7.91258e-240	1.7228	0.349214	1	1.02804
	HP:0000646	Amblyopia	1.78114e-217	5.91516e-214	2.04031	0.861531	1	0.985209
	HP:0003555	Muscle fiber splitting	7.53697e-215	1.66869e-211	2.80592	0.971091	1	0.92524
	HP:0006315	Single median maxillary incisor	1.20362e-192	1.99861e-189	2.47382	0.847071	1	1.02804
	HP:0002715	Abnormality of the immune system	2.2938e-178	3.04709e-175	1.16533	0.00060494	0.334834	1.01758
	HP:0000968	Ectodermal dysplasia	1.18714e-176	1.31417e-173	1.92641	0.473644	1	1.02804
	HP:0010978	Abnormality of immune system physiology	2.80303e-176	2.65967e-173	1.19067	0.00301615	0.513674	1.01761
	HP:0001583	Rotary nystagmus	1.95407e-175	1.62237e-172	2.9838	0.870833	1	1.02804
	HP:0410004	Cleft secondary palate	1.10866e-155	8.18188e-153	2.53552	0.847071	1	1.02804
	HP:0000185	Cleft soft palate	4.50394e-152	2.99152e-149	2.5349	0.870833	1	1.02804
	HP:0004303	Abnormality of muscle fibers	8.43133e-146	5.09099e-143	1.48139	0.99985	1	0.931059
	HP:0001871	Abnormality of blood and blood-forming tissues	8.45845e-146	4.68175e-143	1.17097	0.00270414	0.472656	1.01699
	HP:0011064	Abnormal number of incisors	3.9671e-142	2.02688e-139	1.85584	0.697905	1	1.02804
	HP:0003674	Onset	6.29813e-135	2.98801e-132	1.13342	0.0116225	0.83007	1.01285
	HP:0001317	Abnormality of the cerebellum	7.84971e-131	3.47585e-128	1.14958	0.326845	1	1.00391
	HP:0011283	Abnormality of the metencephalon	1.61088e-129	6.68716e-127	1.1487	0.322078	1	1.00399
	HP:0000656	Ectropion	3.36354e-126	1.31416e-123	1.90064	0.460705	1	1.02804
	HP:0010636	Schizencephaly	5.21343e-126	1.92376e-123	2.2245	0.847071	1	1.02804
	HP:0006530	Interstitial pulmonary abnormality	5.62461e-122	1.96625e-119	2.49658	0.642293	1	1.02804
	HP:0008496	Multiple rows of eyelashes	6.80935e-122	2.26139e-119	3.1383	0.89526	1	1.02804
	HP:0012179	Craniofacial dystonia	3.82504e-115	1.2098e-112	1.72648	0.742495	1	0.999487
	HP:0000504	Abnormality of vision	6.09456e-115	1.84e-112	1.166	0.936018	1	0.989169
	HP:0410030	Cleft lip	2.29011e-114	6.61343e-112	1.2999	0.052855	1	1.02804
	HP:0000951	Abnormality of the skin	6.73947e-113	1.86515e-110	1.11194	0.00703748	0.687397	1.0131
	HP:0002719	Recurrent infections	2.77601e-107	7.37531e-105	1.19912	0.0947654	1	1.01293
	HP:0001263	Global developmental delay	8.057e-106	2.05825e-103	1.11255	0.00867609	0.748397	1.01322
	HP:0011354	Generalized abnormality of skin	1.01845e-105	2.50539e-103	1.18524	0.00719963	0.683142	1.01988
	HP:0007385	Aplasia cutis congenita of scalp	1.64767e-104	3.90852e-102	2.07368	0.737623	1	1.02804
	HP:0003829	Incomplete penetrance	6.96872e-104	1.59608e-101	1.3082	0.999996	1	0.908272
	HP:0003551	Difficulty climbing stairs	1.79558e-103	3.97541e-101	1.93145	0.642293	1	1.02804
Mouse Phenotype	MP:0008251	abnormal phagocyte morphology	2.11112e-258	1.99142e-254	1.17546	6.32755e-05	0.0170537	1.01951
	MP:0013693	abnormal hemopoiesis	4.87144e-239	2.29762e-235	1.15414	0.0001006	0.0189792	1.01767
	MP:0011100	preweaning lethality, complete penetrance	3.04504e-238	9.57462e-235	1.17784	0.0361783	0.751696	1.01047
	MP:0008250	abnormal myeloid leukocyte morphology	2.18958e-227	5.16357e-224	1.15051	1.11346e-05	0.00875275	1.0197
	MP:0001993	abnormal blinking	1.1697e-224	2.20676e-221	2.60495	0.801471	1	1.02804
	MP:0000956	decreased spinal cord size	7.52522e-220	1.18309e-216	1.92746	0.922874	1	0.967571
	MP:0002123	abnormal definitive hematopoiesis	1.44905e-218	1.9527e-215	1.14967	0.000167458	0.027235	1.01738
	MP:0003345	decreased rib number	2.48891e-208	2.93474e-205	1.45842	0.997022	1	0.952591
	MP:0002922	decreased post-tetanic potentiation	2.17517e-200	2.27982e-197	2.80383	0.697905	1	1.02804
	MP:0012440	abnormal neutrophil cell number	1.39833e-197	1.31904e-194	1.26084	0.0340685	0.735395	1.01639
	MP:0005013	increased lymphocyte cell number	4.04696e-191	3.47045e-188	1.15894	0.814852	1	0.99547
	MP:0006387	abnormal T cell number	1.17981e-188	9.27426e-186	1.14021	0.854226	1	0.994985
	MP:0003545	increased alcohol consumption	2.00626e-188	1.45577e-185	2.25109	0.678853	1	1.02804
	MP:0001102	small superior vagus ganglion	2.19563e-188	1.47938e-185	2.05612	0.543988	1	1.02804
	MP:0008248	abnormal mononuclear phagocyte morphology	4.95179e-185	3.11402e-182	1.16662	5.45625e-05	0.016084	1.02184
	MP:0002620	abnormal monocyte morphology	2.92518e-182	1.72457e-179	1.29022	0.0328223	0.725089	1.01975
	MP:0011941	increased fluid intake	2.99376e-179	1.66118e-176	1.43514	0.463944	1	1.00808
	MP:0012243	decreased hepatoblast number	3.23584e-178	1.69576e-175	3.91128	0.946184	1	1.02804
	MP:0000219	increased neutrophil cell number	7.43435e-176	3.69096e-173	1.29558	0.00196261	0.128564	1.02804
	MP:0005065	abnormal neutrophil morphology	2.05319e-175	9.68387e-173	1.23539	0.0254783	0.634133	1.0169
	MP:0012441	abnormal monocyte cell number	3.2265e-174	1.44931e-171	1.29065	0.0396014	0.793121	1.01944
	MP:0011142	abnormal lung-associated mesenchyme development	1.44137e-173	6.18021e-171	2.20286	0.801471	1	1.02804
	MP:0003853	dry skin	9.91799e-173	4.06767e-170	1.84992	0.339668	1	1.02804
	MP:0000691	enlarged spleen	3.75933e-166	1.47757e-163	1.18432	3.5668e-07	0.00168228	1.02804
	MP:0020201	abnormal granulocyte number	1.91833e-163	7.23825e-161	1.1806	0.0021825	0.136342	1.01873
	MP:0000693	spleen hyperplasia	1.21771e-161	4.41796e-159	1.40094	0.0423071	0.821159	1.02804
	MP:0005460	abnormal leukopoiesis	3.69094e-161	1.2895e-158	1.14596	0.000483453	0.0542907	1.01835
	MP:0002419	abnormal innate immunity	4.84818e-160	1.63332e-157	1.16594	1.37157e-05	0.00862538	1.02332
	MP:0002499	chronic inflammation	6.56239e-160	2.13459e-157	1.60363	0.14779	1	1.02804
	MP:0001994	increased blinking frequency	1.14695e-159	3.60638e-157	2.58008	0.920371	1	1.02804

## Sheet: YOUNGBIASED - GREAT
Ontology	GO.ID	Term	Binomial.Raw.P.Value	Binomial.FDR.Q.Val	Binomial.Fold.Enrichment	Raw.Hyper.P.value	Hyper.FDR.Q.Val	Hyper.Fold.Enrichment
Ensembl Genes	17685	LRRC4	4.53364e-29	8.40945e-25	24.4526	0.259044	1	3.86035
	17684	SND1	1.13233e-25	1.05018e-21	28.6123	0.259044	1	3.86035
	8210	AATF	1.06741e-23	6.59979e-20	25.8789	0.259044	1	3.86035
	8212	C17orf78	3.03292e-23	1.40644e-19	24.6334	0.259044	1	3.86035
	1842	PTPN14	4.58347e-19	1.70037e-15	27.3984	0.259044	1	3.86035
	12267	VSTM2L	1.11385e-18	3.44346e-15	25.9545	0.259044	1	3.86035
	19196	GAPVD1	2.07685e-16	5.50335e-13	18.8232	0.259044	1	3.86035
	19197	MAPKAP1	4.08622e-16	9.4744e-13	18.05	0.259044	1	3.86035
	18234	CHD7	4.40811e-15	9.08511e-12	12.6459	0.259044	1	3.86035
	1841	SMYD2	5.09278e-15	9.44659e-12	15.4234	0.259044	1	3.86035
	13699	EIF4E3	2.08309e-14	3.51265e-11	14.1173	0.259044	1	3.86035
	17568	SH2B2	4.31406e-14	6.66846e-11	15.1147	0.259044	1	3.86035
	4637	ENSG00000267281	1.01738e-13	1.45164e-10	43.0305	0.259044	1	3.86035
	4636	NPFF	1.49089e-13	1.97532e-10	41.3824	0.259044	1	3.86035
	8581	CCDC182	1.73175e-13	2.14148e-10	13.774	0.259044	1	3.86035
	13698	FOXP1	4.67187e-13	5.41616e-10	7.34983	0.259044	1	3.86035
	17567	CUX1	6.39023e-13	6.97249e-10	12.6158	0.259044	1	3.86035
	18235	CLVS1	8.16094e-13	8.40985e-10	9.35915	0.259044	1	3.86035
	8580	MSI2	8.44812e-13	8.24759e-10	12.3801	0.259044	1	3.86035
	12266	CTNNBL1	1.08209e-12	1.00359e-09	18.1283	0.259044	1	3.86035
	16567	DST	1.99337e-12	1.76072e-09	11.6805	0.259044	1	3.86035
	15152	TTC23L	2.05881e-12	1.73586e-09	24.9153	0.259044	1	3.86035
	19199	MVB12B	4.22947e-12	3.41098e-09	10.0544	0.259044	1	3.86035
	5955	SIPA1L1	6.11289e-12	4.7245e-09	8.99489	0.259044	1	3.86035
	17454	CASD1	8.04551e-12	5.96945e-09	21.9011	0.259044	1	3.86035
	19117	AMBP	4.33082e-11	3.0897e-08	23.0653	0.259044	1	3.86035
	16812	EPB41L2	4.64898e-11	3.19385e-08	18.5321	0.259044	1	3.86035
	2656	NFKB2	9.56793e-11	6.33841e-08	27.2343	0.259044	1	3.86035
	11458	WDSUB1	9.71969e-11	6.21691e-08	11.0355	0.259044	1	3.86035
	620	ERI3	2.25186e-10	1.39232e-07	24.6794	0.259044	1	3.86035
GO Biological Process	GO:0007010	cytoskeleton organization	3.14688e-41	4.06043e-37	1.60758	3.14043e-15	1.01302e-11	1.43882
	GO:0044265	cellular macromolecule catabolic process	4.36116e-36	2.8136e-32	1.70441	2.08841e-06	0.00020889	1.27003
	GO:0032446	protein modification by small protein conjugation	4.89063e-36	2.10346e-32	1.68447	1.6059e-09	4.60466e-07	1.36162
	GO:0009057	macromolecule catabolic process	2.21635e-34	7.1494e-31	1.61831	2.67342e-06	0.000255519	1.24515
	GO:0044419	interspecies interaction between organisms	1.28221e-31	3.30887e-28	1.7294	0.00865417	0.142612	1.15476
	GO:0044403	symbiosis, encompassing mutualism through parasitism	2.50498e-31	5.38695e-28	1.72648	0.00959473	0.151903	1.15251
	GO:0016567	protein ubiquitination	3.02723e-31	5.58004e-28	1.67177	1.6592e-08	3.50961e-06	1.35767
	GO:1902580	single-organism cellular localization	1.60509e-30	2.5888e-27	1.55139	9.47798e-06	0.000706904	1.2457
	GO:0006417	regulation of translation	4.06715e-30	5.83094e-27	1.91396	1.27128e-07	2.10299e-05	1.43853
	GO:0010608	posttranscriptional regulation of gene expression	7.04124e-30	9.08532e-27	1.80768	2.77252e-05	0.0016562	1.29608
	GO:0051056	regulation of small GTPase mediated signal transduction	1.35333e-29	1.58746e-26	1.83937	2.08654e-10	8.41333e-08	1.63131
	GO:0016032	viral process	1.37378e-29	1.47715e-26	1.74706	0.0141746	0.198368	1.15068
	GO:0044764	multi-organism cellular process	2.59213e-29	2.57279e-26	1.73557	0.0152625	0.205352	1.14718
	GO:0030705	cytoskeleton-dependent intracellular transport	7.43169e-29	6.84936e-26	2.63667	0.000259996	0.0101351	1.51284
	GO:0034248	regulation of cellular amide metabolic process	3.5023e-28	3.01268e-25	1.83218	4.93142e-07	6.36302e-05	1.39917
	GO:0010256	endomembrane system organization	2.10334e-27	1.69621e-24	1.71262	9.22891e-08	1.63124e-05	1.40376
	GO:0007017	microtubule-based process	5.11036e-27	3.87876e-24	1.68669	1.68201e-06	0.000176447	1.33628
	GO:0010970	transport along microtubule	1.17189e-26	8.40047e-24	2.71777	0.000147929	0.0063203	1.58062
	GO:0048193	Golgi vesicle transport	2.8867e-26	1.96037e-23	1.95993	0.000343002	0.0127177	1.33034
	GO:1903047	mitotic cell cycle process	3.94269e-26	2.54363e-23	1.64307	1.12135e-07	1.92918e-05	1.35293
	GO:0006468	protein phosphorylation	1.36016e-25	8.3572e-23	1.43365	7.93502e-16	5.11928e-12	1.44407
	GO:0006259	DNA metabolic process	3.9298e-25	2.30483e-22	1.60485	1.87717e-05	0.00121105	1.25214
	GO:1990778	protein localization to cell periphery	1.05872e-24	5.9394e-22	2.15386	3.74757e-05	0.00214911	1.53968
	GO:0000278	mitotic cell cycle	1.33352e-24	7.16931e-22	1.58461	1.89555e-08	3.88228e-06	1.35858
	GO:0043632	modification-dependent macromolecule catabolic process	1.92955e-24	9.95878e-22	1.72396	1.97643e-06	0.000200802	1.35491
	GO:0030036	actin cytoskeleton organization	2.23034e-24	1.10685e-21	1.67905	5.04004e-11	2.32256e-08	1.55899
	GO:0006511	ubiquitin-dependent protein catabolic process	6.24171e-24	2.98285e-21	1.72054	9.48671e-07	0.000110277	1.37257
	GO:0019941	modification-dependent protein catabolic process	8.88434e-24	4.09409e-21	1.71697	2.25385e-06	0.000223704	1.35613
	GO:0030163	protein catabolic process	1.45971e-23	6.49468e-21	1.63867	1.21616e-06	0.000135277	1.32877
	GO:0016569	covalent chromatin modification	2.59445e-23	1.11587e-20	1.65299	1.38345e-08	2.97511e-06	1.44866
GO Cellular Component	GO:1990234	transferase complex	6.33173e-43	1.05423e-39	1.76694	1.82031e-10	1.01027e-07	1.39176
	GO:1990904	ribonucleoprotein complex	1.07156e-30	8.92071e-28	1.7241	0.000738052	0.020481	1.19
	GO:0030529	intracellular ribonucleoprotein complex	1.49818e-29	8.3149e-27	1.70887	0.00100854	0.0266542	1.18486
	GO:0016442	RISC complex	1.05594e-25	4.39534e-23	8.64004	4.00722e-05	0.00185334	3.47432
	GO:0031252	cell leading edge	3.60119e-25	1.1992e-22	1.72536	9.14945e-17	1.52338e-13	1.76714
	GO:0031332	RNAi effector complex	3.76615e-25	1.04511e-22	7.61024	1.13682e-05	0.000610583	3.50941
	GO:0005730	nucleolus	7.73831e-25	1.84061e-22	1.50889	0.00179752	0.03938	1.16185
	GO:0005815	microtubule organizing center	1.08002e-24	2.2478e-22	1.59197	1.85668e-09	5.1523e-07	1.39482
	GO:0099512	supramolecular fiber	4.45969e-23	8.25043e-21	1.48726	0.0273586	0.242299	1.10846
	GO:0005925	focal adhesion	5.04635e-23	8.40217e-21	1.72618	3.09326e-08	5.72253e-06	1.47948
	GO:0099081	supramolecular polymer	5.8292e-23	8.8233e-21	1.48226	0.0225098	0.210555	1.11267
	GO:0099080	supramolecular complex	6.07721e-23	8.43213e-21	1.48199	0.0236408	0.216274	1.11144
	GO:0005924	cell-substrate adherens junction	8.54286e-23	1.09414e-20	1.72057	5.45148e-08	8.25156e-06	1.4683
	GO:0098796	membrane protein complex	1.35929e-22	1.61658e-20	1.6013	0.159963	0.737778	1.0663
	GO:0035371	microtubule plus-end	2.11384e-22	2.34636e-20	5.62276	0.000683765	0.0192961	2.43812
	GO:0045178	basal part of cell	2.26836e-22	2.36052e-20	3.49024	0.000577145	0.0171598	1.88911
	GO:0030055	cell-substrate junction	2.39778e-22	2.34841e-20	1.70247	3.52176e-08	5.86373e-06	1.4729
	GO:0015629	actin cytoskeleton	4.12978e-22	3.82005e-20	1.65324	8.88794e-09	1.8498e-06	1.46136
	GO:0005802	trans-Golgi network	1.97224e-21	1.72831e-19	2.07604	5.39354e-06	0.000332601	1.56394
	GO:0005768	endosome	5.49129e-21	4.5715e-19	1.45101	0.000514671	0.0161684	1.19058
	GO:0005874	microtubule	1.66353e-20	1.31894e-18	1.66542	2.64032e-05	0.00125604	1.35502
	GO:0070161	anchoring junction	3.69476e-20	2.79627e-18	1.53238	1.8908e-10	7.87045e-08	1.47906
	GO:0005912	adherens junction	4.56303e-20	3.30323e-18	1.53925	2.74203e-10	9.13096e-08	1.48299
	GO:0001726	ruffle	8.8499e-20	6.13961e-18	2.07626	1.64387e-10	1.36852e-07	1.89465
	GO:0005819	spindle	1.63377e-19	1.08809e-17	1.80448	7.19294e-07	7.48515e-05	1.47637
	GO:0016604	nuclear body	2.70274e-19	1.7308e-17	1.48721	5.06386e-07	5.62089e-05	1.3137
	GO:0099513	polymeric cytoskeletal fiber	6.35762e-19	3.92053e-17	1.5332	0.213456	0.817023	1.05334
	GO:1990752	microtubule end	7.5813e-19	4.50817e-17	3.89439	1.02067e-05	0.000566472	2.57357
	GO:0009925	basal plasma membrane	1.01018e-18	5.79981e-17	4.0942	0.0285557	0.248928	1.67282
	GO:0048471	perinuclear region of cytoplasm	7.94581e-18	4.40993e-16	1.46762	2.55176e-07	3.54057e-05	1.33763
GO Molecular Function	GO:0008092	cytoskeletal protein binding	5.75798e-41	2.40223e-37	1.63598	9.68086e-15	4.03885e-11	1.45045
	GO:0045296	cadherin binding	3.98765e-37	8.31824e-34	2.15165	2.38637e-07	4.32866e-05	1.51113
	GO:0000989	transcription factor activity, transcription factor binding	3.68788e-35	5.12862e-32	1.65908	1.20496e-10	4.18923e-08	1.45005
	GO:0000988	transcription factor activity, protein binding	7.61204e-35	7.93935e-32	1.65159	9.06501e-11	3.43811e-08	1.45002
	GO:0032403	protein complex binding	1.24038e-34	1.03497e-31	1.65408	4.08955e-05	0.00294166	1.24065
	GO:0003712	transcription cofactor activity	9.40602e-28	6.54032e-25	1.61343	8.13287e-10	2.26202e-07	1.45578
	GO:0004674	protein serine/threonine kinase activity	1.14395e-26	6.81795e-24	1.70864	5.44571e-14	7.57317e-11	1.61997
	GO:0050839	cell adhesion molecule binding	4.53422e-25	2.3646e-22	1.65946	1.37633e-05	0.00122171	1.33982
	GO:0019900	kinase binding	8.97712e-25	4.16139e-22	1.55355	3.8541e-11	1.60793e-08	1.4439
	GO:0051020	GTPase binding	5.71706e-24	2.38516e-21	1.8501	4.62718e-07	7.72184e-05	1.48199
	GO:0003779	actin binding	3.92231e-23	1.48762e-20	1.6913	6.3581e-08	1.26314e-05	1.46328
	GO:0016817	hydrolase activity, acting on acid anhydrides	4.82769e-23	1.67843e-20	1.51181	9.28852e-06	0.000880721	1.2492
	GO:0016462	pyrophosphatase activity	5.07185e-23	1.62767e-20	1.51209	7.96584e-06	0.000810573	1.25201
	GO:0016818	hydrolase activity, acting on acid anhydrides, in phosphorus-containing anhydrides	6.91901e-23	2.06186e-20	1.50993	9.72559e-06	0.00090167	1.24907
	GO:0017111	nucleoside-triphosphatase activity	3.6373e-22	1.01165e-19	1.51658	6.47688e-06	0.00069286	1.2614
	GO:0016772	transferase activity, transferring phosphorus-containing groups	4.15956e-21	1.08461e-18	1.39584	2.66826e-12	1.3915e-09	1.37369
	GO:0031267	small GTPase binding	8.2893e-21	2.03429e-18	1.82872	8.26864e-06	0.000821351	1.44597
	GO:0016773	phosphotransferase activity, alcohol group as acceptor	1.45232e-20	3.36616e-18	1.431	1.18149e-14	2.46459e-11	1.47514
	GO:0043522	leucine zipper domain binding	1.63077e-20	3.58083e-18	6.10456	0.00929732	0.250248	2.45659
	GO:0019901	protein kinase binding	1.88111e-20	3.924e-18	1.52959	2.61749e-10	8.40012e-08	1.45532
	GO:0017016	Ras GTPase binding	7.27718e-20	1.44573e-17	1.84002	1.85565e-05	0.0014076	1.44406
	GO:0016301	kinase activity	3.25344e-19	6.1697e-17	1.39864	5.46806e-14	5.70319e-11	1.44132
	GO:0004672	protein kinase activity	4.93348e-19	8.94891e-17	1.44969	2.67726e-12	1.24106e-09	1.47319
	GO:0005096	GTPase activator activity	7.50191e-19	1.30408e-16	1.68798	1.45011e-05	0.00120998	1.44588
	GO:0004518	nuclease activity	2.61512e-18	4.36411e-16	2.11226	0.0541435	0.703697	1.19617
	GO:0019904	protein domain specific binding	3.50578e-18	5.62544e-16	1.4353	5.01903e-08	1.04697e-05	1.3478
	GO:0008134	transcription factor binding	7.03727e-18	1.08739e-15	1.47437	3.77435e-10	1.12476e-07	1.46577
	GO:0008047	enzyme activator activity	1.42769e-17	2.12726e-15	1.49741	6.16074e-06	0.000676384	1.33775
	GO:0000975	regulatory region DNA binding	6.73946e-17	9.69553e-15	1.3394	1.62396e-13	1.35503e-10	1.43162
	GO:0060589	nucleoside-triphosphatase regulator activity	8.44432e-17	1.17432e-14	1.59027	1.84267e-05	0.00142363	1.39244
Human Phenotype	HP:0001871	Abnormality of blood and blood-forming tissues	6.19903e-25	4.1174e-21	1.64733	0.0125959	0.175761	1.1504
	HP:0002086	Abnormality of the respiratory system	1.70878e-24	5.67487e-21	1.52091	4.70926e-05	0.00303679	1.23888
	HP:0030680	Abnormality of cardiovascular system morphology	2.89735e-22	6.41474e-19	1.47822	2.91358e-08	1.9352e-05	1.33744
	HP:0001627	Abnormal heart morphology	6.68059e-22	1.10931e-18	1.51873	1.94801e-07	5.62551e-05	1.34455
	HP:0006808	Cerebral hypomyelination	4.07858e-21	5.41799e-18	10.876	0.00711546	0.120872	2.3756
	HP:0012447	Abnormal myelination	1.83179e-20	2.02779e-17	2.03792	0.00752218	0.12306	1.27615
	HP:0001252	Muscular hypotonia	8.20898e-20	7.78915e-17	1.42794	4.45539e-08	2.46606e-05	1.31234
	HP:0001799	Short nail	1.3199e-19	1.09585e-16	10.6743	0.182978	0.766293	1.71571
	HP:0002815	Abnormality of the knee	4.64761e-19	3.42993e-16	2.23366	0.00692654	0.118879	1.38281
	HP:0008364	Abnormality of the calcaneus	1.22137e-18	8.11234e-16	6.42081	0.0213798	0.238663	2.05885
	HP:0200006	Slanting of the palpebral fissure	1.63935e-18	9.89868e-16	1.72734	4.37423e-07	9.07926e-05	1.56328
	HP:0002823	Abnormality of femur morphology	6.45488e-18	3.57277e-15	2.0754	0.00885184	0.138993	1.37656
	HP:0002143	Abnormality of the spinal cord	2.21618e-17	1.1323e-14	2.24343	0.000247803	0.0113511	1.64869
	HP:0001760	Abnormality of the foot	2.2639e-17	1.07406e-14	1.43328	5.83285e-08	2.76727e-05	1.36071
	HP:0012252	Abnormal respiratory system morphology	2.49609e-17	1.10527e-14	1.54303	0.000363019	0.0149762	1.26794
	HP:0001622	Premature birth	9.68808e-17	4.02176e-14	3.3874	0.143102	0.686271	1.31603
	HP:0000494	Downslanted palpebral fissures	1.34426e-16	5.25209e-14	1.81225	3.49292e-06	0.000414285	1.61032
	HP:0001263	Global developmental delay	1.75856e-16	6.48909e-14	1.3902	4.73611e-09	6.29145e-06	1.34092
	HP:0000240	Abnormality of skull size	2.12583e-16	7.43145e-14	1.40273	8.34606e-10	1.84782e-06	1.38631
	HP:0000759	Abnormal peripheral nervous system morphology	4.27981e-16	1.42133e-13	1.582	2.04484e-05	0.00171922	1.34748
	HP:0002814	Abnormality of the lower limb	1.16076e-15	3.67132e-13	1.36493	7.67937e-07	0.000130786	1.29164
	HP:0004360	Abnormality of acid-base homeostasis	1.35713e-15	4.0973e-13	1.81297	0.000421765	0.0165761	1.35827
	HP:0002715	Abnormality of the immune system	1.68255e-15	4.85892e-13	1.4235	0.0499927	0.401999	1.10015
	HP:0001547	Abnormality of the rib cage	2.29771e-15	6.35891e-13	1.83657	0.00217294	0.0542581	1.38024
	HP:0003088	Premature osteoarthritis	2.6973e-15	7.16618e-13	8.87845	0.042544	0.369382	2.57357
	HP:0007364	Aplasia/Hypoplasia of the cerebrum	2.775e-15	7.08905e-13	1.40698	1.40682e-08	1.03824e-05	1.36545
	HP:0001510	Growth delay	3.33367e-15	8.20084e-13	1.35744	2.75007e-07	6.76517e-05	1.29441
	HP:0001881	Abnormality of leukocytes	4.86575e-15	1.15423e-12	1.78068	0.0434544	0.364425	1.1878
	HP:0001698	Pericardial effusion	5.79966e-15	1.32832e-12	8.08197	0.262562	0.743684	1.65444
	HP:0040069	Abnormality of lower limb bone	1.20006e-14	2.65693e-12	1.55439	0.000164692	0.00835024	1.35667
Mouse Phenotype	MP:0013293	embryonic lethality prior to tooth bud stage	1.88688e-65	1.7799e-61	1.90935	1.22895e-12	5.79633e-10	1.41501
	MP:0011100	preweaning lethality, complete penetrance	5.26338e-60	2.48248e-56	1.84929	1.69918e-12	7.63257e-10	1.41876
	MP:0013292	embryonic lethality prior to organogenesis	1.39447e-58	4.38469e-55	1.91376	2.03806e-10	4.09043e-08	1.38952
	MP:0002123	abnormal definitive hematopoiesis	1.94931e-41	4.59695e-38	1.60137	2.69019e-13	1.49274e-10	1.39758
	MP:0013693	abnormal hemopoiesis	1.04838e-39	1.97788e-36	1.5768	5.08749e-13	2.66613e-10	1.38677
	MP:0002401	abnormal lymphopoiesis	4.04064e-38	6.35256e-35	1.71134	9.65609e-13	4.79399e-10	1.4829
	MP:0006207	embryonic lethality during organogenesis	1.03184e-35	1.39047e-32	1.49165	9.09072e-20	4.28764e-16	1.5008
	MP:0000352	decreased cell proliferation	2.19715e-35	2.59072e-32	1.74847	2.10572e-06	0.000105656	1.34089
	MP:0010866	abnormal prenatal body size	5.32569e-35	5.58191e-32	1.5314	4.95333e-22	4.67247e-18	1.55541
	MP:0001697	abnormal embryo size	7.40585e-34	6.98594e-31	1.5807	1.40633e-18	4.42198e-15	1.5599
	MP:0005460	abnormal leukopoiesis	8.87296e-32	7.60897e-29	1.59567	1.06234e-09	1.75809e-07	1.3787
	MP:0011098	embryonic lethality during organogenesis, complete penetrance	1.03828e-30	8.16172e-28	1.51577	4.59843e-18	1.08442e-14	1.5391
	MP:0002408	abnormal double-positive T cell morphology	9.70744e-30	7.04387e-27	2.04776	1.09306e-08	1.3219e-06	1.64752
	MP:0005092	decreased double-positive T cell number	1.25074e-29	8.42728e-27	2.16874	9.89482e-08	8.18753e-06	1.66563
	MP:0001730	embryonic growth arrest	6.4709e-29	4.06933e-26	1.8902	2.0924e-08	2.24291e-06	1.5568
	MP:0002145	abnormal T cell differentiation	2.06973e-28	1.22023e-25	1.73887	7.36838e-11	1.69527e-08	1.54414
	MP:0002144	abnormal B cell differentiation	2.67749e-27	1.48569e-24	1.80489	1.69765e-08	1.86209e-06	1.52829
	MP:0002086	abnormal extraembryonic tissue morphology	3.92917e-27	2.0591e-24	1.51116	1.62119e-14	1.39025e-11	1.49788
	MP:0010865	prenatal growth retardation	5.91587e-27	2.93708e-24	1.54397	5.22001e-14	4.10337e-11	1.50125
	MP:0012762	abnormal alpha-beta T cell morphology	2.1227e-26	1.00117e-23	1.51705	1.00699e-09	1.69624e-07	1.3639
	MP:0006387	abnormal T cell number	3.56279e-26	1.60037e-23	1.46927	9.21995e-12	3.10613e-09	1.36955
	MP:0009850	embryonic lethality between implantation and placentation	3.66875e-26	1.57306e-23	1.72442	6.53726e-09	8.44739e-07	1.4702
	MP:0005018	decreased T cell number	7.72954e-26	3.17012e-23	1.53378	1.28823e-10	2.76178e-08	1.3986
	MP:0000703	abnormal thymus morphology	2.27237e-25	8.93136e-23	1.5735	2.54026e-10	4.89025e-08	1.4412
	MP:0002106	abnormal muscle physiology	2.8692e-24	1.0826e-21	1.38672	3.49088e-16	6.5859e-13	1.44125
	MP:0003566	abnormal cell adhesion	4.67102e-24	1.69468e-21	2.74566	3.72461e-07	2.40645e-05	2.05885
	MP:0012556	increased cell death	5.18286e-24	1.81074e-21	1.43042	1.79145e-10	3.67363e-08	1.35867
	MP:0006042	increased apoptosis	6.32538e-24	2.13097e-21	1.43013	1.05273e-10	2.3094e-08	1.36503
	MP:0002200	abnormal brain ventricular system morphology	9.53144e-24	3.10035e-21	1.64033	2.769e-11	7.46285e-09	1.59015
	MP:0000822	abnormal brain ventricle morphology	3.92413e-23	1.23388e-20	1.67734	1.23476e-11	3.88249e-09	1.66127

## Sheet: YOUNG_FETAL_BIASED - GREAT
Ontology	GO.ID	Term	Binomial.Raw.P.Value	Binomial.FDR.Q.Val	Binomial.Fold.Enrichment	Raw.Hyper.P.value	Hyper.FDR.Q.Val	Hyper.Fold.Enrichment
Ensembl Genes	7639	GSE1	3.19262e-41	5.92199e-37	6.24	0.867864	1	1.15226
	7636	FAM92B	1.23767e-35	1.14788e-31	5.89663	0.867864	1	1.15226
	5543	MCF2L	4.46415e-33	2.76019e-29	6.5919	0.867864	1	1.15226
	8806	SEPT9	2.16016e-31	1.00172e-27	4.25442	0.867864	1	1.15226
	8808	TNRC6C	1.13695e-25	4.21784e-22	3.98905	0.867864	1	1.15226
	14258	LSG1	3.21073e-25	9.92597e-22	4.13232	0.867864	1	1.15226
	5187	NCOR2	8.3712e-25	2.21825e-21	4.71331	0.867864	1	1.15226
	5542	ATP11A	2.2584e-23	5.23639e-20	5.69311	0.867864	1	1.15226
	7332	ZNF423	2.61254e-23	5.38444e-20	4.30893	0.867864	1	1.15226
	5188	SCARB1	2.88849e-21	5.35786e-18	5.10135	0.867864	1	1.15226
	111	VAMP3	3.40304e-21	5.73846e-18	3.38669	0.867864	1	1.15226
	12701	CRYAA	9.35229e-21	1.44563e-17	6.38839	0.867864	1	1.15226
	7682	ZNF778	1.25676e-19	1.7932e-16	5.9461	0.867864	1	1.15226
	7683	ANKRD11	1.57777e-19	2.09043e-16	5.90859	0.867864	1	1.15226
	110	CAMTA1	1.63423e-19	2.02089e-16	3.1758	0.867864	1	1.15226
	8005	RAI1	5.985e-19	6.93849e-16	6.37584	0.867864	1	1.15226
	6151	DLK1	6.42509e-19	7.01052e-16	5.53855	0.867864	1	1.15226
	8006	SREBF1	1.01423e-18	1.04516e-15	5.75809	0.867864	1	1.15226
	7609	CMIP	1.06213e-18	1.03692e-15	4.5239	0.867864	1	1.15226
	14260	XXYLT1	3.12138e-18	2.89492e-15	3.53026	0.867864	1	1.15226
	8500	HOXB3	4.94359e-18	4.3666e-15	23.7239	0.867864	1	1.15226
	8501	HOXB4	5.59469e-18	4.71709e-15	20.6865	0.867864	1	1.15226
	7331	C16orf78	8.56127e-18	6.90448e-15	4.09544	0.867864	1	1.15226
	12702	SIK1	1.16767e-17	9.02462e-15	4.50362	0.867864	1	1.15226
	15682	ARAP3	1.30692e-17	9.69683e-15	6.37271	0.867864	1	1.15226
	118	RERE	1.3636e-17	9.7282e-15	3.98989	0.867864	1	1.15226
	2684	SH3PXD2A	1.79364e-17	1.23223e-14	4.53985	0.867864	1	1.15226
	14200	MAGEF1	4.59009e-17	3.04077e-14	5.92333	0.867864	1	1.15226
	4191	TSPAN9	7.10157e-17	4.54231e-14	4.01742	0.867864	1	1.15226
	12783	MICAL3	8.75935e-17	5.41591e-14	5.32407	0.867864	1	1.15226
GO Biological Process	GO:0007010	cytoskeleton organization	5.95678e-90	7.68603e-86	1.24168	1.35539e-14	7.60375e-12	1.08666
	GO:0030036	actin cytoskeleton organization	6.48618e-88	4.18456e-84	1.35451	5.55829e-11	1.07043e-08	1.10794
	GO:0030029	actin filament-based process	2.92829e-85	1.25946e-81	1.31382	5.73671e-12	1.3218e-09	1.10503
	GO:0031400	negative regulation of protein modification process	6.01035e-66	1.93879e-62	1.2502	1.21272e-05	0.00056085	1.06232
	GO:0051056	regulation of small GTPase mediated signal transduction	1.33453e-65	3.44388e-62	1.33269	4.74903e-09	5.47113e-07	1.11137
	GO:0048646	anatomical structure formation involved in morphogenesis	4.82024e-64	1.03659e-60	1.18455	7.02537e-21	2.26621e-17	1.10869
	GO:0009792	embryo development ending in birth or egg hatching	6.48676e-64	1.1957e-60	1.23239	5.86384e-11	1.11266e-08	1.09464
	GO:0009790	embryo development	7.51356e-63	1.21184e-59	1.1721	1.025e-19	2.20426e-16	1.10138
	GO:0046578	regulation of Ras protein signal transduction	8.77636e-63	1.25824e-59	1.40465	3.40759e-06	0.000190338	1.10836
	GO:0007599	hemostasis	3.8817e-62	5.00856e-59	1.39463	0.494646	1	1.00261
	GO:0043009	chordate embryonic development	8.85325e-62	1.03849e-58	1.22893	9.38721e-11	1.59373e-08	1.09412
	GO:0072358	cardiovascular system development	9.30365e-60	1.00037e-56	1.22838	6.824e-11	1.25786e-08	1.10031
	GO:0009611	response to wounding	1.42414e-59	1.41351e-56	1.25623	0.00466658	0.0756443	1.04202
	GO:0001944	vasculature development	1.10837e-57	1.02152e-54	1.22702	1.45123e-11	3.0697e-09	1.10414
	GO:0016032	viral process	2.43623e-57	2.09565e-54	1.27706	0.0440509	0.377416	1.02669
	GO:0044419	interspecies interaction between organisms	3.82198e-57	3.08219e-54	1.26067	0.0671686	0.491313	1.02238
	GO:0044403	symbiosis, encompassing mutualism through parasitism	8.72053e-57	6.61888e-54	1.26012	0.0710726	0.500027	1.022
	GO:0007596	blood coagulation	2.96988e-56	2.12891e-53	1.37548	0.539553	1	1.00014
	GO:0044764	multi-organism cellular process	3.67317e-56	2.49447e-53	1.27137	0.0652058	0.479129	1.02362
	GO:0050817	coagulation	6.39496e-56	4.12571e-53	1.37405	0.652495	1	0.993584
	GO:2001233	regulation of apoptotic signaling pathway	2.73492e-55	1.68041e-52	1.32534	2.62387e-05	0.00110279	1.07584
	GO:0051345	positive regulation of hydrolase activity	1.77182e-54	1.03917e-51	1.20494	0.00210256	0.0406128	1.04023
	GO:0042326	negative regulation of phosphorylation	2.14134e-54	1.20129e-51	1.24768	9.76266e-09	1.08593e-06	1.0931
	GO:0001568	blood vessel development	3.9088e-54	2.10147e-51	1.22316	1.50076e-10	2.39065e-08	1.10172
	GO:0042060	wound healing	1.11323e-52	5.74558e-50	1.26635	0.0307007	0.29518	1.03382
	GO:0002520	immune system development	1.10561e-51	5.48682e-49	1.21877	2.14626e-05	0.000932429	1.06196
	GO:0043062	extracellular structure organization	2.33854e-51	1.11756e-48	1.31729	3.78129e-07	2.7565e-05	1.09936
	GO:0030198	extracellular matrix organization	3.67462e-51	1.69334e-48	1.3169	4.16993e-07	3.00584e-05	1.09919
	GO:0007346	regulation of mitotic cell cycle	4.79422e-50	2.13309e-47	1.22756	1.17951e-06	7.38796e-05	1.06764
	GO:0009894	regulation of catabolic process	2.5283e-49	1.08742e-46	1.24029	0.00230402	0.0436546	1.04526
GO Cellular Component	GO:0015629	actin cytoskeleton	9.25197e-104	1.54045e-100	1.39454	2.22316e-07	1.32199e-05	1.08418
	GO:0005925	focal adhesion	3.14108e-86	2.61495e-83	1.3866	1.48151e-10	1.89747e-08	1.10839
	GO:0005924	cell-substrate adherens junction	3.00733e-85	1.66907e-82	1.38354	4.07762e-10	4.52616e-08	1.10582
	GO:0030055	cell-substrate junction	3.82137e-78	1.59064e-75	1.36115	2.68887e-10	3.19783e-08	1.10628
	GO:0070161	anchoring junction	5.21101e-73	1.73527e-70	1.28244	7.61631e-12	1.40902e-09	1.10149
	GO:0001726	ruffle	1.37408e-70	3.81308e-68	1.55197	0.00109458	0.0193881	1.08863
	GO:0005912	adherens junction	2.56399e-70	6.09864e-68	1.281	9.73963e-13	2.31664e-10	1.10662
	GO:0048471	perinuclear region of cytoplasm	5.77018e-61	1.20092e-58	1.24257	1.31766e-06	6.6482e-05	1.06645
	GO:0005938	cell cortex	7.58245e-58	1.40275e-55	1.37452	0.000480388	0.00999807	1.07761
	GO:0099568	cytoplasmic region	2.38808e-55	3.97615e-53	1.3318	4.42174e-05	0.00126935	1.08117
	GO:0005774	vacuolar membrane	1.75446e-52	2.65562e-50	1.3515	0.000887445	0.0164177	1.05891
	GO:0042641	actomyosin	6.33398e-52	8.7884e-50	1.72605	0.00654762	0.0893589	1.11625
	GO:0031252	cell leading edge	4.25686e-51	5.45205e-49	1.27689	6.70484e-10	6.5668e-08	1.1083
	GO:0098562	cytoplasmic side of membrane	6.6354e-51	7.89139e-49	1.44802	0.0158442	0.178247	1.06081
	GO:0099512	supramolecular fiber	3.40185e-50	3.77606e-48	1.1967	0.957654	1	0.978522
	GO:0099081	supramolecular polymer	1.85035e-49	1.92552e-47	1.19376	0.957762	1	0.978593
	GO:0099080	supramolecular complex	2.29857e-49	2.25125e-47	1.19354	0.964726	1	0.977517
	GO:0001725	stress fiber	2.92475e-48	2.70539e-46	1.79575	0.0248485	0.250744	1.10794
	GO:0005765	lysosomal membrane	4.30445e-48	3.77206e-46	1.36407	0.00930903	0.120151	1.04872
	GO:0032432	actin filament bundle	1.84918e-44	1.53944e-42	1.70258	0.012866	0.153014	1.11252
	GO:0005768	endosome	2.0728e-44	1.64344e-42	1.18025	8.79361e-07	4.57543e-05	1.05937
	GO:0009898	cytoplasmic side of plasma membrane	3.145e-44	2.38019e-42	1.43152	0.0158292	0.17929	1.06414
	GO:0044437	vacuolar part	4.08905e-43	2.96012e-41	1.25875	0.000564473	0.0113235	1.05188
	GO:0032587	ruffle membrane	1.15e-42	7.9781e-41	1.58856	0.00659232	0.0892375	1.09988
	GO:0031253	cell projection membrane	2.81593e-42	1.87541e-40	1.29134	0.000178945	0.00425634	1.07445
	GO:0005773	vacuole	1.87246e-41	1.19909e-39	1.20748	5.07773e-05	0.00143295	1.05239
	GO:0099503	secretory vesicle	4.8568e-40	2.99502e-38	1.18112	0.0538701	0.462339	1.02039
	GO:0030141	secretory granule	9.20183e-39	5.4718e-37	1.19604	0.261915	1	1.00927
	GO:0044448	cell cortex part	1.75854e-38	1.00964e-36	1.4473	0.00205812	0.0329497	1.09206
	GO:0031234	extrinsic component of cytoplasmic side of plasma membrane	4.623e-38	2.56576e-36	1.50082	0.0199194	0.213973	1.07757
GO Molecular Function	GO:0032403	protein complex binding	2.96469e-105	1.23687e-101	1.30978	1.52133e-06	0.000154805	1.06078
	GO:0008092	cytoskeletal protein binding	2.79142e-85	5.82291e-82	1.24625	1.02186e-14	4.26322e-12	1.09041
	GO:0045296	cadherin binding	4.71222e-85	6.55313e-82	1.45516	1.26038e-07	1.64322e-05	1.10298
	GO:0019900	kinase binding	1.07376e-83	1.11993e-80	1.28093	1.26003e-13	4.3807e-11	1.09883
	GO:0000975	regulatory region DNA binding	8.85494e-73	7.38856e-70	1.20104	1.15029e-19	2.39951e-16	1.10447
	GO:0044212	transcription regulatory region DNA binding	1.33171e-72	9.25982e-70	1.20088	1.41851e-19	1.97268e-16	1.10436
	GO:0001067	regulatory region nucleic acid binding	1.61622e-72	9.63268e-70	1.20048	1.03576e-19	4.32117e-16	1.10453
	GO:0019901	protein kinase binding	1.18286e-71	6.16862e-69	1.27593	3.34504e-13	9.96823e-11	1.10331
	GO:0003690	double-stranded DNA binding	9.45646e-59	4.38359e-56	1.18697	2.07759e-15	9.63078e-13	1.09507
	GO:0003779	actin binding	1.53922e-57	6.42163e-55	1.29566	1.04554e-08	1.6777e-06	1.09766
	GO:0005085	guanyl-nucleotide exchange factor activity	1.18905e-56	4.50972e-54	1.31705	2.00216e-06	0.000194256	1.09142
	GO:0000988	transcription factor activity, protein binding	2.25827e-53	7.85127e-51	1.21419	3.6687e-05	0.00242949	1.05924
	GO:0000989	transcription factor activity, transcription factor binding	4.75245e-53	1.52517e-50	1.21478	1.83506e-05	0.00139198	1.06184
	GO:1990837	sequence-specific double-stranded DNA binding	3.43775e-51	1.02445e-48	1.1799	3.34942e-17	1.74672e-14	1.10477
	GO:0051015	actin filament binding	6.02032e-50	1.67445e-47	1.48413	0.00993984	0.232972	1.07152
	GO:0008134	transcription factor binding	9.50435e-50	2.47826e-47	1.22018	1.48943e-08	2.30144e-06	1.08511
	GO:0008047	enzyme activator activity	3.07493e-49	7.54623e-47	1.23151	0.000188104	0.00957037	1.05871
	GO:0008289	lipid binding	5.93368e-49	1.3753e-46	1.2143	0.000190957	0.00937264	1.0513
	GO:0000976	transcription regulatory region sequence-specific DNA binding	4.51832e-48	9.92127e-46	1.17751	1.0029e-17	6.97351e-15	1.10877
	GO:0016817	hydrolase activity, acting on acid anhydrides	1.21041e-47	2.52492e-45	1.20069	3.6755e-05	0.00239596	1.04995
	GO:0016818	hydrolase activity, acting on acid anhydrides, in phosphorus-containing anhydrides	1.64598e-47	3.27002e-45	1.20043	4.30979e-05	0.00268365	1.04959
	GO:0016462	pyrophosphatase activity	2.475e-47	4.69349e-45	1.20019	2.9566e-05	0.00205582	1.05071
	GO:0071889	14-3-3 protein binding	9.54537e-47	1.73145e-44	2.03654	0.13885	1	1.10617
	GO:0017111	nucleoside-triphosphatase activity	1.55151e-46	2.69705e-44	1.2043	9.43656e-05	0.00532018	1.04854
	GO:0003924	GTPase activity	1.1081e-44	1.84919e-42	1.37035	0.0255448	0.44221	1.04564
	GO:0005088	Ras guanyl-nucleotide exchange factor activity	2.86535e-44	4.59779e-42	1.30337	8.83743e-07	9.21743e-05	1.10579
	GO:0005089	Rho guanyl-nucleotide exchange factor activity	3.25782e-42	5.03393e-40	1.57178	0.00144533	0.0543237	1.12233
	GO:0000977	RNA polymerase II regulatory region sequence-specific DNA binding	9.56462e-42	1.42513e-39	1.17528	9.18692e-18	7.66556e-15	1.11454
	GO:0001012	RNA polymerase II regulatory region DNA binding	1.57376e-41	2.26404e-39	1.17438	7.33005e-18	7.64524e-15	1.11466
	GO:0000287	magnesium ion binding	3.33495e-41	4.6378e-39	1.38125	0.00866256	0.21512	1.06496
Human Phenotype	HP:0001871	Abnormality of blood and blood-forming tissues	2.36723e-48	1.57231e-44	1.24241	0.0677727	0.538453	1.02305
	HP:0001263	Global developmental delay	3.7429e-46	1.24302e-42	1.18334	3.08594e-09	9.31674e-07	1.07193
	HP:0003115	Abnormal EKG	1.82638e-38	4.04361e-35	1.88519	0.005252	0.0869921	1.15226
	HP:0040078	Axonal degeneration	3.98008e-37	6.60892e-34	3.46119	0.321745	1	1.15226
	HP:0045054	Brachial plexus neuropathy	2.16016e-31	2.86955e-28	4.25442	0.867864	1	1.15226
	HP:0030680	Abnormality of cardiovascular system morphology	9.46509e-30	1.04779e-26	1.14854	7.1464e-05	0.00312279	1.05094
	HP:0011354	Generalized abnormality of skin	3.61894e-29	3.43386e-26	1.23624	0.0509772	0.435766	1.03337
	HP:0012447	Abnormal myelination	8.22032e-28	6.82492e-25	1.31201	0.0107388	0.14294	1.05703
	HP:0001892	Abnormal bleeding	6.61395e-27	4.88109e-24	1.36307	0.0677048	0.539203	1.0475
	HP:0000518	Cataract	4.43944e-26	2.94868e-23	1.24657	0.099441	0.692335	1.03162
	HP:0001695	Cardiac arrest	6.08502e-26	3.67425e-23	1.6877	0.0309806	0.315603	1.12193
	HP:0031547	Abnormal QT interval	1.92292e-25	1.06434e-22	1.78364	0.0288546	0.300867	1.15226
	HP:0009830	Peripheral neuropathy	2.38181e-25	1.21692e-22	1.26589	0.00441171	0.0749426	1.06008
	HP:0011283	Abnormality of the metencephalon	2.50355e-25	1.18775e-22	1.15752	7.87827e-05	0.00339789	1.05519
	HP:0000517	Abnormality of the lens	3.25727e-25	1.44232e-22	1.2322	0.091008	0.649974	1.03158
	HP:0010929	Abnormality of cation homeostasis	5.48164e-25	2.27557e-22	1.43036	0.15763	0.895616	1.03984
	HP:0001657	Prolonged QT interval	5.50839e-25	2.15216e-22	1.81301	0.0332544	0.33466	1.15226
	HP:0001627	Abnormal heart morphology	6.62492e-25	2.44459e-22	1.14691	0.000168673	0.00618963	1.05237
	HP:0001317	Abnormality of the cerebellum	9.29087e-25	3.24789e-22	1.15565	8.84551e-05	0.00362666	1.05488
	HP:0010927	Abnormality of divalent inorganic cation homeostasis	3.21022e-24	1.06611e-21	1.66094	0.493831	1	1.01319
	HP:0004363	Abnormality of calcium homeostasis	5.46557e-24	1.72868e-21	1.68098	0.397441	1	1.02655
	HP:0001252	Muscular hypotonia	7.51765e-24	2.26965e-21	1.12618	1.04004e-10	5.3138e-08	1.07687
	HP:0011217	Abnormal shape of the occiput	1.9592e-23	5.65784e-21	1.82761	0.686646	1	0.987647
	HP:0000508	Ptosis	3.94584e-23	1.09201e-20	1.23671	0.000168521	0.00621842	1.08135
	HP:0011025	Abnormality of cardiovascular system physiology	5.84318e-23	1.55242e-20	1.184	0.00842833	0.120389	1.0439
	HP:0002813	Abnormality of limb bone morphology	7.08034e-23	1.80876e-20	1.1218	1.18218e-11	1.30867e-08	1.08575
	HP:0002815	Abnormality of the knee	7.13171e-23	1.7544e-20	1.34154	0.0125332	0.161328	1.07486
	HP:0011121	Abnormality of skin morphology	7.80414e-23	1.85125e-20	1.12993	0.000194019	0.00689132	1.04724
	HP:0001933	Subcutaneous hemorrhage	8.56239e-23	1.96108e-20	1.46614	0.0608124	0.499278	1.06995
	HP:0040077	Abnormal concentration of calcium in blood	2.43947e-22	5.40098e-20	1.73456	0.376572	1	1.03703
Mouse Phenotype	MP:0013693	abnormal hemopoiesis	4.84627e-113	4.57149e-109	1.26473	3.60064e-05	0.00085125	1.04645
	MP:0010866	abnormal prenatal body size	4.67399e-111	2.20449e-107	1.25945	4.34434e-16	2.73201e-13	1.09277
	MP:0001697	abnormal embryo size	1.40131e-104	4.4062e-101	1.27877	5.59891e-13	9.2657e-11	1.09112
	MP:0006207	embryonic lethality during organogenesis	1.04562e-97	2.46584e-94	1.22258	8.44664e-16	3.98386e-13	1.08877
	MP:0002123	abnormal definitive hematopoiesis	9.51812e-96	1.79569e-92	1.24668	5.69194e-05	0.00125449	1.04588
	MP:0011098	embryonic lethality during organogenesis, complete penetrance	9.73895e-94	1.53112e-90	1.24749	1.15922e-14	3.41717e-12	1.09502
	MP:0013659	abnormal erythroid lineage cell morphology	4.27628e-92	5.76259e-89	1.25743	5.30031e-07	2.01604e-05	1.0596
	MP:0001698	decreased embryo size	2.16559e-89	2.5535e-86	1.27321	2.47422e-12	3.76441e-10	1.09538
	MP:0002086	abnormal extraembryonic tissue morphology	1.55497e-86	1.62978e-83	1.25173	2.02897e-10	1.8764e-08	1.08322
	MP:0000703	abnormal thymus morphology	6.24446e-76	5.8904e-73	1.27236	0.00028396	0.00457097	1.05239
	MP:0002447	abnormal erythrocyte morphology	5.51296e-74	4.72762e-71	1.23842	1.17628e-06	3.93471e-05	1.05985
	MP:0011100	preweaning lethality, complete penetrance	1.66561e-72	1.30931e-69	1.24229	3.82298e-05	0.000890424	1.05096
	MP:0002925	abnormal cardiovascular development	3.69417e-72	2.68054e-69	1.19115	4.82212e-18	6.49815e-15	1.10234
	MP:0002401	abnormal lymphopoiesis	4.31113e-71	2.90478e-68	1.25848	0.0029146	0.0299819	1.04115
	MP:0006208	lethality throughout fetal growth and development	4.2941e-70	2.70042e-67	1.24238	2.52417e-15	9.5242e-13	1.11589
	MP:0013662	decreased myeloid cell number	6.59887e-70	3.89045e-67	1.34014	1.02877e-05	0.000282105	1.0782
	MP:0006387	abnormal T cell number	1.36887e-67	7.59562e-65	1.20737	0.143582	0.479436	1.0136
	MP:0013661	abnormal myeloid cell number	1.54579e-67	8.1008e-65	1.26963	2.41696e-05	0.000603152	1.06268
	MP:0000259	abnormal vascular development	3.3298e-67	1.65316e-64	1.22581	3.01957e-13	5.58503e-11	1.1034
	MP:0005460	abnormal leukopoiesis	3.0151e-63	1.42207e-60	1.22637	0.00115688	0.0142466	1.042
	MP:0010865	prenatal growth retardation	8.0611e-63	3.62097e-60	1.22625	3.64894e-09	2.56869e-07	1.07959
	MP:0005018	decreased T cell number	9.23638e-62	3.96031e-59	1.22536	0.280907	0.685056	1.00899
	MP:0005013	increased lymphocyte cell number	1.44206e-57	5.91432e-55	1.21461	0.235731	0.654208	1.0106
	MP:0002132	abnormal respiratory system morphology	1.47563e-56	5.79984e-54	1.16532	1.47944e-12	2.36535e-10	1.07993
	MP:0002006	neoplasm	6.32412e-55	2.38622e-52	1.1795	2.70278e-09	2.00751e-07	1.06794
	MP:0005164	abnormal response to injury	1.58129e-54	5.73705e-52	1.23749	1.20699e-07	5.55393e-06	1.07746
	MP:0002151	abnormal neural tube morphology	2.04856e-53	7.15705e-51	1.20468	6.46291e-15	2.10223e-12	1.10639
	MP:0008251	abnormal phagocyte morphology	3.1863e-53	1.07344e-50	1.19432	0.000417519	0.00634212	1.04291
	MP:0012762	abnormal alpha-beta T cell morphology	3.88222e-53	1.26279e-50	1.19933	0.447761	0.839541	1.00265
	MP:0001914	hemorrhage	3.49548e-52	1.09909e-49	1.2015	2.83029e-12	4.2378e-10	1.09605

[truncated: 4 more sheets: YOUNG_ADULT_BIASED- GREAT, OLDBIASED - GREAT, OLD_FETAL_BIASED - GREAT, OLD_ADULT_BIASED - GREAT]
