# Supplementary material for: Shifting epigenetic contexts influence regulatory variation and disease risk
Source: Aging (Albany NY). 2021 Jun 16;13(12):15699–749. doi: 10.18632/aging.203194 (PMC8266365; doi:10.18632/aging.203194)
Supplement: Supplementary Table 2 [file aging-13-203194-s004.xls]

## Sheet: Development Promoter Access.
Supplementary Table 2. Regulatory Gene Associations and Expression Data.
logFC	t	P.Value	adj.P.Val	gene	DIR
-7.57	-14.39	1.263e-31	1.159e-30	TNNI3K	FETAL-BIASED
-5.78	-7.89	3.019e-13	7.301e-13	LINC00613	FETAL-BIASED
-5.77	-10.56	1.482e-20	5.525e-20	MIR1-2	FETAL-BIASED
-5.32	-6.08	7.189e-09	1.354e-08	MIR586	FETAL-BIASED
-4.81	-2.75	0.006595	0.008449	SMA4	FETAL-BIASED
-4.66	-7.94	2.227e-13	5.431e-13	LOC101928509	FETAL-BIASED
-4.63	-13.38	1.041e-28	7.121e-28	BMP5	FETAL-BIASED
-4.53	-6.06	7.794e-09	1.465e-08	DEFB114	FETAL-BIASED
-4.46	-7.95	2.066e-13	5.046e-13	FBXW7-AS1	FETAL-BIASED
-4.39	-13.31	1.713e-28	1.153e-27	MIR1245B	FETAL-BIASED
-4.38	-13.29	1.906e-28	1.276e-27	MIR1245A	FETAL-BIASED
-4.01	-10.16	2.003e-19	6.935e-19	MIR15B	FETAL-BIASED
-3.97	-5.58	8.934e-08	1.579e-07	XKR3	FETAL-BIASED
-3.96	-15.3	2.784e-34	3.408e-33	MLIP	FETAL-BIASED
-3.96	-10.19	1.734e-19	6.023e-19	MIR16-2	FETAL-BIASED
-3.96	-7.31	8.891e-12	1.976e-11	LOC105376633	FETAL-BIASED
-3.9	-9.66	5.219e-18	1.656e-17	LOC102723883	FETAL-BIASED
-3.85	-15.5	7.535e-35	9.861e-34	PLN	FETAL-BIASED
-3.82	-12.55	2.679e-26	1.504e-25	MIR133A1	FETAL-BIASED
-3.81	-6.54	6.383e-10	1.274e-09	SI	FETAL-BIASED
-3.77	-12.74	7.888e-27	4.601e-26	ABCA6	FETAL-BIASED
-3.75	-14.85	5.834e-33	6.203e-32	TECRL	FETAL-BIASED
-3.74	-12.3	1.463e-25	7.784e-25	OGN	FETAL-BIASED
-3.69	-7.1	2.936e-11	6.333e-11	CYLC2	FETAL-BIASED
-3.69	-6.74	2.109e-10	4.326e-10	KLRK1	FETAL-BIASED
-3.55	-6.4	1.318e-09	2.587e-09	MIR302F	FETAL-BIASED
-3.54	-15.27	3.57e-34	4.313e-33	GPR22	FETAL-BIASED
-3.51	-11.86	2.835e-24	1.371e-23	POSTN	FETAL-BIASED
-3.47	-9	3.331e-16	9.51e-16	CSN1S2AP	FETAL-BIASED
-3.45	-15.91	5.145e-36	7.835e-35	TRDN	FETAL-BIASED
-3.44	-7.07	3.468e-11	7.456e-11	FGB	FETAL-BIASED
-3.42	-6.81	1.447e-10	2.998e-10	PCDH9-AS4	FETAL-BIASED
-3.4	-5.3	3.429e-07	5.848e-07	LOC105374820	FETAL-BIASED
-3.39	-2.6	0.01023	0.01291	POTEH-AS1	FETAL-BIASED
-3.37	-14.15	5.887e-31	4.973e-30	NDUFA5	FETAL-BIASED
-3.37	-8.92	5.597e-16	1.58e-15	MIR15A	FETAL-BIASED
-3.34	-15.94	4.25e-36	6.516e-35	LRRC39	FETAL-BIASED
-3.34	-5.31	3.287e-07	5.612e-07	LINC01676	FETAL-BIASED
-3.33	-7.37	6.332e-12	1.422e-11	APOBEC3B	FETAL-BIASED
-3.31	-2.55	0.01173	0.01474	WASH5P	FETAL-BIASED
-3.25	-2.07	0.03977	0.04765	GOLGA8T	FETAL-BIASED
-3.24	-11.73	6.497e-24	3.056e-23	SLITRK6	FETAL-BIASED
-3.23	-13.64	1.883e-29	1.374e-28	ASB15	FETAL-BIASED
-3.23	-12.22	2.468e-25	1.29e-24	DCN	FETAL-BIASED
-3.21	-13.73	9.981e-30	7.448e-29	MACC1-AS1	FETAL-BIASED
-3.21	-11.94	1.628e-24	8.015e-24	LRRC70	FETAL-BIASED
-3.21	-11.94	1.628e-24	8.015e-24	IPO11-LRRC70	FETAL-BIASED
-3.18	-9.28	5.757e-17	1.717e-16	PTPRQ	FETAL-BIASED
-3.17	-7.43	4.316e-12	9.776e-12	MIR561	FETAL-BIASED
-3.13	-12.23	2.274e-25	1.193e-24	PPP1R3A	FETAL-BIASED
-3.13	-7.18	1.877e-11	4.094e-11	LOC100130964	FETAL-BIASED
-3.12	-6.51	7.25e-10	1.443e-09	SNORD3A	FETAL-BIASED
-3.11	-13.34	1.383e-28	9.388e-28	FGF7	FETAL-BIASED
-3.05	-11.41	5.426e-23	2.39e-22	LINC00597	FETAL-BIASED
-3.04	-8.78	1.3e-15	3.584e-15	LINC02032	FETAL-BIASED
-3.03	-7.47	3.427e-12	7.803e-12	SERPINI2	FETAL-BIASED
-3	-13	1.335e-27	8.301e-27	MIR4490	FETAL-BIASED
-3	-7.18	1.8e-11	3.93e-11	RGS21	FETAL-BIASED
-3	-4.18	4.595e-05	6.912e-05	CYLC1	FETAL-BIASED
-2.97	-14.76	1.036e-32	1.064e-31	LOC101928590	FETAL-BIASED
-2.97	-8.18	5.212e-14	1.313e-13	MIR3119-2	FETAL-BIASED
-2.96	-2.08	0.03903	0.04682	LOC727751	FETAL-BIASED
-2.95	-12.73	8.244e-27	4.802e-26	COL3A1	FETAL-BIASED
-2.95	-11.08	4.871e-22	1.998e-21	LINC01619	FETAL-BIASED
-2.94	-13.68	1.418e-29	1.045e-28	HRAT13	FETAL-BIASED
-2.94	-13.58	2.71e-29	1.949e-28	BCHE	FETAL-BIASED
-2.94	-10.04	4.407e-19	1.496e-18	DIRC1	FETAL-BIASED
-2.93	-14.06	1.085e-30	8.928e-30	B3GALT2	FETAL-BIASED
-2.92	-13.2	3.422e-28	2.241e-27	LINC01392	FETAL-BIASED
-2.91	-11.26	1.519e-22	6.473e-22	ABCA9	FETAL-BIASED
-2.9	-15.6	3.873e-35	5.254e-34	CSRNP3	FETAL-BIASED
-2.85	-6.35	1.746e-09	3.399e-09	LOC101928020	FETAL-BIASED
-2.84	-13.99	1.758e-30	1.421e-29	TTN	FETAL-BIASED
-2.84	-7.01	4.885e-11	1.041e-10	MIR3713	FETAL-BIASED
-2.81	-11.55	2.154e-23	9.746e-23	SULT1E1	FETAL-BIASED
-2.79	-15.76	1.37e-35	1.968e-34	SCN3A	FETAL-BIASED
-2.79	-11.94	1.603e-24	7.894e-24	NAV3	FETAL-BIASED
-2.79	-8.05	1.172e-13	2.899e-13	MIR3119-1	FETAL-BIASED
-2.76	-8.93	5.098e-16	1.443e-15	LINC00924	FETAL-BIASED
-2.75	-11.77	5.213e-24	2.468e-23	ECM2	FETAL-BIASED
-2.75	-6.53	6.534e-10	1.304e-09	SNORD113-5	FETAL-BIASED
-2.74	-13.44	7.194e-29	4.99e-28	ASPN	FETAL-BIASED
-2.74	-13.44	7.313e-29	5.068e-28	SCN2A	FETAL-BIASED
-2.74	-13.3	1.755e-28	1.18e-27	LINC02101	FETAL-BIASED
-2.73	-6.72	2.432e-10	4.966e-10	LINC01047	FETAL-BIASED
-2.72	-12.53	3.105e-26	1.732e-25	DPYD-AS2	FETAL-BIASED
-2.72	-12.2	2.881e-25	1.499e-24	ABCA8	FETAL-BIASED
-2.71	-8.58	4.556e-15	1.216e-14	MIR1279	FETAL-BIASED
-2.69	-23.76	4.442e-57	6.333e-54	HIST1H3E	FETAL-BIASED
-2.69	-2.34	0.02024	0.02494	WASH7P	FETAL-BIASED
-2.67	-15.49	7.845e-35	1.024e-33	LINC02085	FETAL-BIASED
-2.66	-14.21	4.02e-31	3.472e-30	ALPK1	FETAL-BIASED
-2.65	-12.03	8.686e-25	4.356e-24	SOSTDC1	FETAL-BIASED
-2.65	-11.24	1.716e-22	7.282e-22	MGAT4C	FETAL-BIASED
-2.64	-11.8	4.164e-24	1.99e-23	LUM	FETAL-BIASED
-2.64	-9.11	1.734e-16	5.029e-16	SLC8A1	FETAL-BIASED
-2.63	-12.68	1.162e-26	6.689e-26	TNFAIP6	FETAL-BIASED
-2.63	-12.11	5.291e-25	2.699e-24	ANGPTL1	FETAL-BIASED
-2.62	-12.95	1.94e-27	1.192e-26	MIR4657	FETAL-BIASED
-2.62	-11.78	4.692e-24	2.228e-23	EYS	FETAL-BIASED
-2.61	-16.15	1.046e-36	1.732e-35	CTNNA3	FETAL-BIASED
-2.61	-10.55	1.642e-20	6.103e-20	LINC02104	FETAL-BIASED
-2.61	-9.67	4.893e-18	1.556e-17	KERA	FETAL-BIASED
-2.6	-11.5	3.052e-23	1.368e-22	LOC101928540	FETAL-BIASED
-2.6	-10.27	1.037e-19	3.646e-19	FAP	FETAL-BIASED
-2.59	-7.23	1.355e-11	2.979e-11	RRH	FETAL-BIASED
-2.58	-14.09	9.24e-31	7.676e-30	LOC101929570	FETAL-BIASED
-2.58	-11.76	5.518e-24	2.61e-23	HTR2B	FETAL-BIASED
-2.57	-14.08	9.773e-31	8.089e-30	PALLD	FETAL-BIASED
-2.57	-13.53	3.926e-29	2.788e-28	SEMA3A	FETAL-BIASED
-2.57	-11.3	1.177e-22	5.058e-22	MIR30A	FETAL-BIASED
-2.56	-2.06	0.04093	0.04897	AQP7P3	FETAL-BIASED
-2.55	-12.79	5.42e-27	3.198e-26	CALCRL	FETAL-BIASED
-2.55	-2.35	0.02011	0.02478	SNORD3C	FETAL-BIASED
-2.54	-28.96	3.008e-69	8.149e-65	IGF2BP3	FETAL-BIASED
-2.51	-12.4	7.781e-26	4.23e-25	LOC105369507	FETAL-BIASED
-2.51	-8.79	1.265e-15	3.488e-15	MIR16-1	FETAL-BIASED
-2.49	-12.6	1.98e-26	1.122e-25	CPS1-IT1	FETAL-BIASED
-2.48	-14.23	3.573e-31	3.102e-30	NPY6R	FETAL-BIASED
-2.48	-13.08	8.034e-28	5.085e-27	MIR133A1HG	FETAL-BIASED
-2.47	-12.1	5.46e-25	2.781e-24	RFTN2	FETAL-BIASED
-2.47	-11.83	3.513e-24	1.688e-23	PCDH15	FETAL-BIASED
-2.47	-8.94	4.929e-16	1.396e-15	SYTL5	FETAL-BIASED
-2.46	-20.42	1.69e-48	2.113e-46	LINC01248	FETAL-BIASED
-2.46	-12.46	5.048e-26	2.772e-25	MSS51	FETAL-BIASED
-2.46	-11.07	5.117e-22	2.095e-21	TFPI	FETAL-BIASED
-2.45	-13.95	2.331e-30	1.856e-29	NDST4	FETAL-BIASED
-2.45	-9.77	2.608e-18	8.449e-18	LOC643733	FETAL-BIASED
-2.44	-14.95	2.937e-33	3.217e-32	METTL11B	FETAL-BIASED
-2.43	-15.48	8.93e-35	1.16e-33	LINC00486	FETAL-BIASED
-2.43	-6.44	1.084e-09	2.138e-09	MIR3169	FETAL-BIASED
-2.42	-12.28	1.658e-25	8.777e-25	KMO	FETAL-BIASED
-2.4	-14.79	8.676e-33	9.001e-32	MYT1L	FETAL-BIASED
-2.4	-13.36	1.236e-28	8.411e-28	LURAP1L-AS1	FETAL-BIASED
-2.4	-12.73	8.537e-27	4.963e-26	VCAM1	FETAL-BIASED
-2.4	-11.63	1.251e-23	5.753e-23	LINC00632	FETAL-BIASED
-2.4	-11.12	3.68e-22	1.525e-21	ZBTB20-AS4	FETAL-BIASED
-2.4	-7.29	9.68e-12	2.146e-11	MIR2053	FETAL-BIASED
-2.4	-6.61	4.326e-10	8.712e-10	SNORD113-2	FETAL-BIASED
-2.39	-17.35	4.101e-40	1.048e-38	ADAMTSL1	FETAL-BIASED
-2.39	-11.71	7.524e-24	3.52e-23	IL33	FETAL-BIASED
-2.39	-10.16	2.068e-19	7.155e-19	HRAT17	FETAL-BIASED
-2.38	-14.59	3.235e-32	3.146e-31	RAPGEF2	FETAL-BIASED
-2.38	-13.55	3.406e-29	2.431e-28	SHROOM3	FETAL-BIASED
-2.38	-7.98	1.692e-13	4.15e-13	LINC00972	FETAL-BIASED
-2.37	-6.22	3.543e-09	6.786e-09	MIR5692C1	FETAL-BIASED
-2.36	-15.85	7.499e-36	1.118e-34	GPX8	FETAL-BIASED
-2.36	-10.96	1.11e-21	4.44e-21	NEGR1-IT1	FETAL-BIASED
-2.36	-2.3	0.02257	0.02769	GOLGA2P7	FETAL-BIASED
-2.35	-22.04	9.61e-53	4.412e-50	HIST1H2BH	FETAL-BIASED
-2.35	-14.21	3.974e-31	3.434e-30	MIR99AHG	FETAL-BIASED
-2.35	-13.29	1.907e-28	1.276e-27	KLHL4	FETAL-BIASED
-2.35	-11.03	6.924e-22	2.81e-21	ANGPTL5	FETAL-BIASED
-2.34	-16.59	5.968e-38	1.151e-36	FAM198B	FETAL-BIASED
-2.33	-18.32	8.268e-43	3.333e-41	MIR6132	FETAL-BIASED
-2.33	-6.97	5.819e-11	1.234e-10	LINC00314	FETAL-BIASED
-2.33	-6.85	1.139e-10	2.375e-10	GPC6-AS2	FETAL-BIASED
-2.31	-15.14	8.045e-34	9.342e-33	CDH10	FETAL-BIASED
-2.31	-14.27	2.697e-31	2.378e-30	FSBP	FETAL-BIASED
-2.31	-14.15	6.271e-31	5.279e-30	FILIP1	FETAL-BIASED
-2.31	-12.07	7.021e-25	3.549e-24	MYOZ2	FETAL-BIASED
-2.3	-13.67	1.48e-29	1.09e-28	LRRTM4	FETAL-BIASED
-2.3	-11.64	1.213e-23	5.583e-23	LOC100996694	FETAL-BIASED
-2.3	-2.08	0.03937	0.0472	LOC440895	FETAL-BIASED
-2.29	-11.45	4.329e-23	1.92e-22	SH3D19	FETAL-BIASED
-2.29	-10.92	1.414e-21	5.621e-21	LINC00377	FETAL-BIASED
-2.28	-14.3	2.256e-31	2.011e-30	C7	FETAL-BIASED
-2.27	-9.27	6.335e-17	1.884e-16	CFH	FETAL-BIASED
-2.27	-6.29	2.351e-09	4.548e-09	CRISP3	FETAL-BIASED
-2.26	-14.07	1.023e-30	8.44e-30	MIR125B1	FETAL-BIASED
-2.26	-6.89	9.47e-11	1.983e-10	CCDC158	FETAL-BIASED
-2.25	-16.78	1.696e-38	3.486e-37	MIR181A1HG	FETAL-BIASED
-2.25	-12.19	3.06e-25	1.59e-24	LINC01822	FETAL-BIASED
-2.24	-11.81	3.783e-24	1.814e-23	LEMD1	FETAL-BIASED
-2.24	-11.45	4.397e-23	1.95e-22	LOC101929109	FETAL-BIASED
-2.23	-15.37	1.792e-34	2.241e-33	ALPK2	FETAL-BIASED
-2.23	-13.43	7.687e-29	5.316e-28	LRRC17	FETAL-BIASED
-2.22	-7.13	2.423e-11	5.248e-11	RXFP2	FETAL-BIASED
-2.21	-15.64	2.99e-35	4.122e-34	CCDC141	FETAL-BIASED
-2.2	-12.8	5.239e-27	3.095e-26	IGSF11-AS1	FETAL-BIASED
-2.2	-10.44	3.215e-20	1.171e-19	STX19	FETAL-BIASED
-2.2	-9.31	4.683e-17	1.405e-16	MIR214	FETAL-BIASED
-2.2	-7.07	3.353e-11	7.215e-11	LINC01821	FETAL-BIASED
-2.19	-15.54	5.94e-35	7.873e-34	TNFRSF19	FETAL-BIASED
-2.19	-9.37	3.267e-17	9.898e-17	MIR3120	FETAL-BIASED
-2.19	-7.75	6.895e-13	1.634e-12	MIR2054	FETAL-BIASED
-2.18	-8.33	2.165e-14	5.57e-14	MIR3688-2	FETAL-BIASED
-2.17	-21.36	5.386e-51	1.247e-48	SOX11	FETAL-BIASED
-2.17	-11.84	3.207e-24	1.545e-23	LINC01338	FETAL-BIASED
-2.17	-10.63	9.822e-21	3.705e-20	APELA	FETAL-BIASED
-2.17	-6.82	1.349e-10	2.798e-10	MIR548E	FETAL-BIASED
-2.16	-16.29	4.094e-37	7.099e-36	SYNE1-AS1	FETAL-BIASED
-2.16	-11.65	1.108e-23	5.115e-23	LINC00977	FETAL-BIASED
-2.15	-12.22	2.56e-25	1.337e-24	KCNMB2	FETAL-BIASED
-2.15	-11.88	2.441e-24	1.187e-23	LOC101927286	FETAL-BIASED
-2.15	-10.34	6.334e-20	2.262e-19	ANXA10	FETAL-BIASED
-2.14	-10.93	1.308e-21	5.215e-21	ANKRD1	FETAL-BIASED
-2.13	-10.32	7.265e-20	2.586e-19	ITGB6	FETAL-BIASED
-2.13	-7.57	1.958e-12	4.521e-12	CNTN3	FETAL-BIASED
-2.13	-2.85	0.004939	0.006397	UGT2B17	FETAL-BIASED
-2.12	-23.3	6.039e-56	6.059e-53	HIST1H3F	FETAL-BIASED
-2.12	-3.34	0.001023	0.001408	MIR1264	FETAL-BIASED
-2.11	-9.35	3.686e-17	1.113e-16	LINC01111	FETAL-BIASED
-2.11	-8.64	3.233e-15	8.7e-15	OMD	FETAL-BIASED
-2.11	-7.32	8.208e-12	1.83e-11	PTPRC	FETAL-BIASED
-2.11	-6.19	4.091e-09	7.812e-09	MIR3144	FETAL-BIASED
-2.1	-9.55	1.063e-17	3.314e-17	C1QTNF7	FETAL-BIASED
-2.1	-8.7	2.228e-15	6.052e-15	AGTR2	FETAL-BIASED
-2.09	-12.52	3.425e-26	1.904e-25	LPAR4	FETAL-BIASED
-2.09	-5.27	3.861e-07	6.566e-07	GLYATL3	FETAL-BIASED
-2.08	-13.59	2.605e-29	1.877e-28	LOC101926968	FETAL-BIASED
-2.08	-10.72	5.314e-21	2.038e-20	BANCR	FETAL-BIASED
-2.06	-14.22	3.825e-31	3.311e-30	DNM3OS	FETAL-BIASED
-2.06	-13.23	2.898e-28	1.908e-27	GPR85	FETAL-BIASED
-2.06	-12.35	1.065e-25	5.719e-25	COL5A2	FETAL-BIASED
-2.06	-11.05	6.17e-22	2.514e-21	LOC105378330	FETAL-BIASED
-2.06	-8.94	4.958e-16	1.404e-15	ASB11	FETAL-BIASED
-2.06	-7.17	1.946e-11	4.239e-11	LINC01365	FETAL-BIASED
-2.06	-5.39	2.22e-07	3.827e-07	CSN1S1	FETAL-BIASED
-2.05	-16.12	1.232e-36	2.024e-35	GJA1	FETAL-BIASED
-2.05	-13.61	2.283e-29	1.654e-28	IL1RAPL1	FETAL-BIASED
-2.05	-9.99	6.044e-19	2.032e-18	RD3L	FETAL-BIASED
-2.05	-9.94	8.334e-19	2.778e-18	NEUROD6	FETAL-BIASED
-2.05	-9.67	4.888e-18	1.554e-17	MURC	FETAL-BIASED
-2.05	-9.32	4.429e-17	1.331e-16	LMOD2	FETAL-BIASED
-2.05	-7.4	5.199e-12	1.172e-11	SMR3A	FETAL-BIASED
-2.05	-7.13	2.405e-11	5.21e-11	ABCA10	FETAL-BIASED
-2.04	-16.76	1.973e-38	4.021e-37	FLRT3	FETAL-BIASED
-2.04	-14.38	1.316e-31	1.205e-30	SELENOP	FETAL-BIASED
-2.04	-14.08	9.89e-31	8.175e-30	MIR199A2	FETAL-BIASED
-2.04	-12.13	4.576e-25	2.348e-24	LOC103352541	FETAL-BIASED
-2.04	-8.08	9.351e-14	2.325e-13	MIR5011	FETAL-BIASED
-2.03	-23.13	1.607e-55	1.451e-52	ZNF300	FETAL-BIASED
-2.03	-22.09	7.12e-53	3.507e-50	HIST1H4F	FETAL-BIASED
-2.03	-14.84	6.19e-33	6.555e-32	LRRN3	FETAL-BIASED
-2.03	-9.47	1.683e-17	5.181e-17	LINC00703	FETAL-BIASED
-2.03	-9.27	6.126e-17	1.824e-16	PCGEM1	FETAL-BIASED
-2.02	-15.04	1.584e-33	1.785e-32	PCDH18	FETAL-BIASED
-2.02	-9.44	2.085e-17	6.387e-17	CP	FETAL-BIASED
-2.02	-7.52	2.567e-12	5.89e-12	HCRTR2	FETAL-BIASED
-2.02	-7.19	1.772e-11	3.869e-11	SNORD113-9	FETAL-BIASED
-2.02	-3.01	0.003006	0.004001	LOC103171574	FETAL-BIASED
-2.01	-18.86	2.753e-44	1.437e-42	GPC6	FETAL-BIASED
-2.01	-14.57	3.66e-32	3.543e-31	FAM13A	FETAL-BIASED
-2.01	-13.72	1.049e-29	7.808e-29	EYA1	FETAL-BIASED
-2.01	-7.03	4.265e-11	9.111e-11	MUC7	FETAL-BIASED
-2	-15.63	3.256e-35	4.461e-34	ZEB2	FETAL-BIASED
-2	-14.29	2.381e-31	2.114e-30	ZBTB20-AS5	FETAL-BIASED
-2	-12.64	1.486e-26	8.504e-26	C2orf80	FETAL-BIASED
-2	-11.52	2.668e-23	1.201e-22	PDE1A	FETAL-BIASED
-2	-11.33	9.228e-23	4e-22	DCX	FETAL-BIASED
-2	-9.48	1.59e-17	4.901e-17	ASPA	FETAL-BIASED
-2	-9.5	1.462e-17	4.52e-17	MAB21L2	FETAL-BIASED
-2	-7.55	2.157e-12	4.973e-12	GRM5-AS1	FETAL-BIASED
-2	-2.96	0.003469	0.004593	LINC01002	FETAL-BIASED
-1.99	-13.89	3.404e-30	2.668e-29	NYAP2	FETAL-BIASED
-1.99	-9.12	1.573e-16	4.57e-16	CLEC2B	FETAL-BIASED
-1.98	-10.66	7.952e-21	3.018e-20	PLAC8	FETAL-BIASED
-1.98	-10.22	1.379e-19	4.818e-19	XIRP2-AS1	FETAL-BIASED
-1.98	-7.95	2.089e-13	5.102e-13	LINC01592	FETAL-BIASED
-1.97	-15.88	5.993e-36	9.044e-35	HMGN5	FETAL-BIASED
-1.97	-9.94	8.401e-19	2.799e-18	ANXA1	FETAL-BIASED
-1.97	-9.22	8.418e-17	2.485e-16	MIR1302-6	FETAL-BIASED
-1.96	-17.83	1.846e-41	5.847e-40	LRRIQ1	FETAL-BIASED
-1.96	-16.65	3.837e-38	7.55e-37	BCO2	FETAL-BIASED
-1.96	-13.38	1.032e-28	7.06e-28	LINC00920	FETAL-BIASED
-1.96	-10.18	1.77e-19	6.145e-19	LOC101928516	FETAL-BIASED
-1.96	-5.79	3.167e-08	5.748e-08	MIR548AE1	FETAL-BIASED
-1.95	-17.83	1.854e-41	5.861e-40	TSPAN19	FETAL-BIASED
-1.95	-16.09	1.566e-36	2.54e-35	SH3BGRL	FETAL-BIASED
-1.95	-14.75	1.117e-32	1.143e-31	MC4R	FETAL-BIASED
-1.95	-11.67	1.018e-23	4.718e-23	MIR4437	FETAL-BIASED
-1.95	-9.95	8.175e-19	2.727e-18	MIR302B	FETAL-BIASED
-1.95	-9.62	6.584e-18	2.078e-17	LOC101928211	FETAL-BIASED
-1.95	-7.89	3.011e-13	7.284e-13	RBMS3-AS1	FETAL-BIASED
-1.94	-12.84	3.907e-27	2.33e-26	ELF1	FETAL-BIASED
-1.94	-8.92	5.609e-16	1.583e-15	TGFB2-OT1	FETAL-BIASED
-1.93	-12.63	1.656e-26	9.441e-26	SNORD50A	FETAL-BIASED
-1.93	-9.45	2.022e-17	6.201e-17	LINC01781	FETAL-BIASED
-1.93	-9.36	3.445e-17	1.042e-16	SPARCL1	FETAL-BIASED
-1.93	-6.52	6.851e-10	1.365e-09	LINC00158	FETAL-BIASED
-1.93	-2.14	0.0338	0.04078	RNA5S14	FETAL-BIASED
-1.92	-18.84	2.956e-44	1.528e-42	SULT1C4	FETAL-BIASED
-1.92	-14.3	2.187e-31	1.955e-30	COL11A1	FETAL-BIASED
-1.92	-10.25	1.168e-19	4.098e-19	MIR3115	FETAL-BIASED
-1.91	-19.77	8.861e-47	7.438e-45	HIST1H3J	FETAL-BIASED
-1.91	-15.5	7.555e-35	9.877e-34	RBMS3	FETAL-BIASED
-1.91	-15.12	9.68e-34	1.114e-32	NR2F1	FETAL-BIASED
-1.91	-11.81	3.825e-24	1.833e-23	GRIA1	FETAL-BIASED
-1.91	-11.75	5.69e-24	2.688e-23	LINC01412	FETAL-BIASED
-1.91	-7.97	1.829e-13	4.482e-13	UGT2B4	FETAL-BIASED
-1.91	-7.91	2.574e-13	6.255e-13	ODAM	FETAL-BIASED
-1.91	-7.76	6.3e-13	1.496e-12	MIR3688-1	FETAL-BIASED
-1.9	-9.79	2.186e-18	7.123e-18	MIR302C	FETAL-BIASED
-1.89	-9.67	5.001e-18	1.589e-17	TRIM55	FETAL-BIASED
-1.88	-17.66	5.61e-41	1.652e-39	ADAMTS6	FETAL-BIASED
-1.88	-16.75	2.034e-38	4.14e-37	EPC1	FETAL-BIASED
-1.88	-7.02	4.534e-11	9.675e-11	MIR4782	FETAL-BIASED
-1.87	-16.52	9.143e-38	1.725e-36	LINC01798	FETAL-BIASED
-1.87	-7.52	2.545e-12	5.842e-12	OSTN	FETAL-BIASED
-1.87	-6.18	4.359e-09	8.315e-09	PMCH	FETAL-BIASED
-1.87	-5.76	3.583e-08	6.483e-08	TMPRSS11D	FETAL-BIASED
-1.87	-4.1	6.245e-05	9.311e-05	SNORD113-4	FETAL-BIASED
-1.86	-11.72	6.984e-24	3.278e-23	ABI3BP	FETAL-BIASED
-1.86	-10.79	3.261e-21	1.268e-20	IFI44	FETAL-BIASED
-1.86	-10.22	1.352e-19	4.726e-19	LMO3	FETAL-BIASED
-1.86	-9.98	6.806e-19	2.282e-18	FAM216B	FETAL-BIASED
-1.86	-8.99	3.665e-16	1.045e-15	ACKR4	FETAL-BIASED
-1.85	-19.09	6.479e-45	3.892e-43	MIR181A2HG	FETAL-BIASED
-1.85	-13.87	3.92e-30	3.052e-29	LINC01351	FETAL-BIASED
-1.85	-11.66	1.084e-23	5.01e-23	ALS2CR12	FETAL-BIASED
-1.85	-11.52	2.627e-23	1.183e-22	SMIM18	FETAL-BIASED
-1.85	-9.34	4.092e-17	1.232e-16	PIK3C2G	FETAL-BIASED
-1.85	-6.15	4.971e-09	9.454e-09	SNORA95	FETAL-BIASED
-1.84	-12.78	5.835e-27	3.433e-26	POP3	FETAL-BIASED
-1.84	-11.03	6.68e-22	2.715e-21	LOC100507388	FETAL-BIASED
-1.84	-10.68	6.947e-21	2.649e-20	A2M	FETAL-BIASED
-1.84	-8.79	1.25e-15	3.451e-15	LINC01553	FETAL-BIASED
-1.84	-5.05	1.079e-06	1.788e-06	LINC00448	FETAL-BIASED
-1.83	-15.9	5.232e-36	7.954e-35	RBMS3-AS3	FETAL-BIASED
-1.83	-10.84	2.373e-21	9.293e-21	RASGRP3	FETAL-BIASED
-1.83	-9.99	6.24e-19	2.097e-18	PI15	FETAL-BIASED
-1.83	-8.32	2.277e-14	5.852e-14	TDO2	FETAL-BIASED
-1.82	-13.74	9.598e-30	7.177e-29	DDR2	FETAL-BIASED
-1.82	-10.4	4.219e-20	1.522e-19	GRIP1	FETAL-BIASED
-1.82	-10.28	9.536e-20	3.364e-19	AGR3	FETAL-BIASED
-1.82	-7.58	1.814e-12	4.196e-12	FGL1	FETAL-BIASED
-1.81	-15.95	3.828e-36	5.903e-35	ZEB2-AS1	FETAL-BIASED
-1.81	-9.78	2.385e-18	7.748e-18	LINC00702	FETAL-BIASED
-1.81	-9.17	1.171e-16	3.425e-16	NAALADL2	FETAL-BIASED
-1.81	-8.8	1.168e-15	3.23e-15	LEMD1-AS1	FETAL-BIASED
-1.81	-6.88	9.882e-11	2.067e-10	MIR548F3	FETAL-BIASED
-1.8	-10.51	2.122e-20	7.819e-20	KCNRG	FETAL-BIASED
-1.8	-10.16	2.086e-19	7.214e-19	UGT2A3	FETAL-BIASED
-1.8	-8.94	4.954e-16	1.403e-15	LOC101928253	FETAL-BIASED
-1.79	-15.22	4.724e-34	5.625e-33	SLC1A3	FETAL-BIASED
-1.79	-12.94	2.086e-27	1.279e-26	LOC101928909	FETAL-BIASED
-1.79	-12.21	2.615e-25	1.365e-24	GABRG1	FETAL-BIASED
-1.79	-11.1	4.315e-22	1.778e-21	LOC100287010	FETAL-BIASED
-1.79	-10.04	4.436e-19	1.504e-18	VCAN-AS1	FETAL-BIASED
-1.79	-9.77	2.581e-18	8.365e-18	LINC00400	FETAL-BIASED
-1.79	-8.71	2.054e-15	5.591e-15	SMPX	FETAL-BIASED
-1.79	-6.7	2.596e-10	5.296e-10	DNAJA1P5	FETAL-BIASED
-1.78	-20.23	5.462e-48	6.296e-46	HIST1H2BG	FETAL-BIASED
-1.78	-20.18	7.386e-48	8.149e-46	HIST1H2AE	FETAL-BIASED
-1.78	-9.08	2.077e-16	5.995e-16	TXK	FETAL-BIASED
-1.78	-8.66	2.834e-15	7.653e-15	NRAP	FETAL-BIASED
-1.78	-7.05	3.783e-11	8.116e-11	OPA1-AS1	FETAL-BIASED
-1.78	-6.89	9.388e-11	1.966e-10	MIR548AZ	FETAL-BIASED
-1.77	-15.35	2.089e-34	2.597e-33	ELAVL2	FETAL-BIASED
-1.77	-9.02	2.916e-16	8.356e-16	MIR8062	FETAL-BIASED
-1.76	-14.17	5.205e-31	4.419e-30	RHOJ	FETAL-BIASED
-1.76	-11.57	1.882e-23	8.544e-23	KIAA1107	FETAL-BIASED
-1.76	-10.55	1.609e-20	5.989e-20	MYOM1	FETAL-BIASED
-1.76	-10.35	5.927e-20	2.122e-19	LOC100506725	FETAL-BIASED
-1.76	-10.21	1.527e-19	5.323e-19	ZNF474	FETAL-BIASED
-1.76	-9.81	2.001e-18	6.532e-18	IGF1	FETAL-BIASED
-1.76	-7.32	8.421e-12	1.875e-11	SNORA100	FETAL-BIASED
-1.75	-14.99	2.292e-33	2.543e-32	EPHA3	FETAL-BIASED
-1.75	-13.99	1.788e-30	1.444e-29	FMO4	FETAL-BIASED
-1.75	-10.35	6.104e-20	2.183e-19	MIR1243	FETAL-BIASED
-1.75	-9.78	2.399e-18	7.795e-18	CYSLTR2	FETAL-BIASED
-1.75	-5.31	3.287e-07	5.612e-07	FSIP2-AS1	FETAL-BIASED
-1.74	-16.11	1.39e-36	2.267e-35	COX7B	FETAL-BIASED
-1.74	-13.28	2.064e-28	1.377e-27	MAT2B	FETAL-BIASED
-1.74	-11.7	7.947e-24	3.71e-23	MUM1L1	FETAL-BIASED
-1.74	-6.44	1.085e-09	2.139e-09	LOC102724919	FETAL-BIASED
-1.74	-4.61	7.664e-06	1.208e-05	LOC101928280	FETAL-BIASED
-1.73	-13.49	4.973e-29	3.493e-28	GAP43	FETAL-BIASED
-1.73	-10.8	3.072e-21	1.196e-20	SNORD126	FETAL-BIASED
-1.73	-6.91	8.275e-11	1.739e-10	SNORD113-7	FETAL-BIASED
-1.73	-6.53	6.551e-10	1.307e-09	SPTA1	FETAL-BIASED
-1.72	-21.53	2.019e-51	5.362e-49	ZNF154	FETAL-BIASED
-1.72	-16.56	7.261e-38	1.386e-36	ZNF300P1	FETAL-BIASED
-1.72	-14.46	7.686e-32	7.214e-31	SCG2	FETAL-BIASED
-1.72	-12.25	2.047e-25	1.078e-24	CREB5	FETAL-BIASED
-1.72	-11.66	1.054e-23	4.876e-23	LINC01625	FETAL-BIASED
-1.71	-22.78	1.243e-54	8.858e-52	ZNF730	FETAL-BIASED
-1.71	-18.51	2.388e-43	1.062e-41	KCNT2	FETAL-BIASED
-1.71	-12.41	7.066e-26	3.848e-25	BRINP3	FETAL-BIASED
-1.7	-16.67	3.424e-38	6.79e-37	LOC101927043	FETAL-BIASED
-1.7	-13.9	3.156e-30	2.481e-29	LOC100506606	FETAL-BIASED
-1.7	-12.06	7.219e-25	3.644e-24	LINC02044	FETAL-BIASED
-1.7	-10.55	1.599e-20	5.953e-20	NCKAP5	FETAL-BIASED
-1.7	-7.82	4.572e-13	1.095e-12	TMEM244	FETAL-BIASED
-1.7	-7.11	2.702e-11	5.839e-11	MIR3140	FETAL-BIASED
-1.7	-6.38	1.483e-09	2.9e-09	LOC102723439	FETAL-BIASED
-1.69	-13.33	1.514e-28	1.024e-27	NAALAD2	FETAL-BIASED
-1.69	-12.97	1.624e-27	1.004e-26	LRRTM2	FETAL-BIASED
-1.69	-9.86	1.47e-18	4.832e-18	LOC105369891	FETAL-BIASED
-1.69	-9.39	2.975e-17	9.043e-17	MIR302A	FETAL-BIASED
-1.69	-7.7	9.023e-13	2.123e-12	NLGN1-AS1	FETAL-BIASED
-1.69	-4.99	1.416e-06	2.332e-06	CYP7A1	FETAL-BIASED
-1.69	-2.22	0.02796	0.034	LINC01662	FETAL-BIASED
-1.68	-17.92	1.078e-41	3.619e-40	HIST1H4I	FETAL-BIASED
-1.68	-14.25	3.025e-31	2.651e-30	JAKMIP2	FETAL-BIASED
-1.68	-13.74	9.181e-30	6.891e-29	MIR1284	FETAL-BIASED
-1.68	-10.38	4.977e-20	1.791e-19	SORBS2	FETAL-BIASED
-1.68	-5.61	7.662e-08	1.359e-07	MIR876	FETAL-BIASED
-1.67	-14.76	1.002e-32	1.031e-31	TXLNB	FETAL-BIASED
-1.67	-14.09	9.237e-31	7.676e-30	SYT4	FETAL-BIASED
-1.67	-9.13	1.484e-16	4.317e-16	LOC102723895	FETAL-BIASED
-1.67	-9.03	2.741e-16	7.859e-16	LIN28B	FETAL-BIASED
-1.67	-8.53	6.092e-15	1.615e-14	SGCG	FETAL-BIASED
-1.67	-7.82	4.471e-13	1.071e-12	ANGPTL3	FETAL-BIASED
-1.67	-6.45	1.049e-09	2.071e-09	SLIT2-IT1	FETAL-BIASED
-1.67	-4.61	7.593e-06	1.198e-05	KLRC3	FETAL-BIASED
-1.66	-21.54	1.864e-51	4.999e-49	LOC101927168	FETAL-BIASED
-1.66	-15.08	1.201e-33	1.368e-32	LUZP2	FETAL-BIASED
-1.66	-11.42	5.317e-23	2.344e-22	LOC105747689	FETAL-BIASED
-1.66	-10.73	4.949e-21	1.901e-20	DIAPH3-AS1	FETAL-BIASED
-1.66	-6.92	7.666e-11	1.614e-10	LOC101927907	FETAL-BIASED
-1.66	-6.3	2.28e-09	4.413e-09	SNORA32	FETAL-BIASED
-1.66	-6.21	3.545e-09	6.789e-09	MIR99A	FETAL-BIASED
-1.65	-16.38	2.349e-37	4.192e-36	CHD2	FETAL-BIASED
-1.65	-14.53	4.873e-32	4.648e-31	BDH2	FETAL-BIASED
-1.65	-11.31	1.046e-22	4.516e-22	LINC01102	FETAL-BIASED
-1.65	-8.95	4.641e-16	1.316e-15	FABP4	FETAL-BIASED
-1.65	-6.3	2.312e-09	4.474e-09	SSMEM1	FETAL-BIASED
-1.64	-27.05	6.185e-65	5.585e-61	ZNF711	FETAL-BIASED
-1.64	-11.58	1.756e-23	7.994e-23	AADACP1	FETAL-BIASED
-1.64	-7.33	7.874e-12	1.757e-11	TNFSF18	FETAL-BIASED
-1.63	-17.17	1.353e-39	3.189e-38	RNU5B-1	FETAL-BIASED
-1.63	-14.67	1.948e-32	1.946e-31	VWC2L	FETAL-BIASED
-1.63	-13.93	2.674e-30	2.12e-29	NBAT1	FETAL-BIASED
-1.63	-12.8	5.166e-27	3.055e-26	SLC17A6	FETAL-BIASED
-1.63	-11.24	1.674e-22	7.111e-22	BTN3A3	FETAL-BIASED
-1.63	-8.11	8.133e-14	2.027e-13	SMYD1	FETAL-BIASED
-1.63	-8.03	1.321e-13	3.262e-13	SOX2-OT	FETAL-BIASED
-1.63	-6.51	7.557e-10	1.503e-09	FDCSP	FETAL-BIASED
-1.62	-17.19	1.146e-39	2.728e-38	HIST1H1D	FETAL-BIASED
-1.62	-13.82	5.398e-30	4.149e-29	RNU5A-1	FETAL-BIASED
-1.62	-13.11	6.381e-28	4.078e-27	COL4A6	FETAL-BIASED
-1.62	-12.36	1.012e-25	5.449e-25	RPSAP52	FETAL-BIASED
-1.62	-11.42	5.374e-23	2.368e-22	IL23R	FETAL-BIASED
-1.62	-11.15	3.028e-22	1.263e-21	SCHIP1	FETAL-BIASED
-1.62	-9.15	1.291e-16	3.766e-16	MIR302D	FETAL-BIASED
-1.62	-8.61	3.832e-15	1.027e-14	UGT2B7	FETAL-BIASED
-1.62	-7.71	8.559e-13	2.017e-12	HOXA3	FETAL-BIASED
-1.62	-7.09	3.044e-11	6.564e-11	MIR548F2	FETAL-BIASED
-1.61	-20.82	1.406e-49	2.366e-47	VSNL1	FETAL-BIASED
-1.61	-20.42	1.692e-48	2.113e-46	HIST1H4E	FETAL-BIASED
-1.61	-16.66	3.635e-38	7.181e-37	LOC100505658	FETAL-BIASED
-1.61	-13.04	1.069e-27	6.703e-27	COL4A5	FETAL-BIASED
-1.61	-10.79	3.405e-21	1.322e-20	DPP10	FETAL-BIASED
-1.61	-10.23	1.3e-19	4.548e-19	LINC01515	FETAL-BIASED
-1.61	-8.82	1.035e-15	2.878e-15	MIR367	FETAL-BIASED
-1.61	-8.26	3.161e-14	8.057e-14	LOC100507195	FETAL-BIASED
-1.61	-8.23	3.852e-14	9.771e-14	FSD2	FETAL-BIASED
-1.61	-8.05	1.152e-13	2.852e-13	LINC01614	FETAL-BIASED
-1.61	-7.26	1.188e-11	2.621e-11	ASB14	FETAL-BIASED
-1.6	-19.32	1.539e-45	1.025e-43	CXXC4	FETAL-BIASED
-1.6	-17.78	2.634e-41	8.155e-40	HIST1H2BF	FETAL-BIASED
-1.6	-7.7	9.012e-13	2.12e-12	NAALADL2-AS2	FETAL-BIASED
-1.6	-6.68	2.984e-10	6.065e-10	LINC01376	FETAL-BIASED
-1.59	-17.82	2.066e-41	6.463e-40	HCG16	FETAL-BIASED
-1.59	-16.53	8.674e-38	1.639e-36	LRRTM3	FETAL-BIASED
-1.59	-16.31	3.575e-37	6.243e-36	ABCD2	FETAL-BIASED
-1.59	-12.71	9.534e-27	5.516e-26	CCDC80	FETAL-BIASED
-1.59	-11.39	6.439e-23	2.823e-22	FBXO40	FETAL-BIASED
-1.59	-9.17	1.131e-16	3.311e-16	MIR4759	FETAL-BIASED
-1.59	-7.79	5.241e-13	1.251e-12	LINC00364	FETAL-BIASED
-1.59	-7.65	1.215e-12	2.839e-12	LINC02039	FETAL-BIASED
-1.59	-7.42	4.749e-12	1.073e-11	LINC01339	FETAL-BIASED
-1.58	-14.34	1.734e-31	1.567e-30	FSTL5	FETAL-BIASED
-1.58	-14.33	1.765e-31	1.593e-30	MARCH1	FETAL-BIASED
-1.58	-11.66	1.032e-23	4.779e-23	LOC101929411	FETAL-BIASED
-1.58	-9.32	4.473e-17	1.344e-16	MIR4679-2	FETAL-BIASED
-1.58	-5.62	7.345e-08	1.305e-07	LIPI	FETAL-BIASED
-1.57	-12.53	3.242e-26	1.806e-25	NBDY	FETAL-BIASED
-1.57	-10.46	2.916e-20	1.065e-19	RERG-AS1	FETAL-BIASED
-1.57	-9.24	7.474e-17	2.213e-16	LINC01495	FETAL-BIASED
-1.57	-8.41	1.307e-14	3.402e-14	STARD13-AS	FETAL-BIASED
-1.57	-7.01	4.702e-11	1.003e-10	MIR3685	FETAL-BIASED
-1.57	-6.28	2.49e-09	4.81e-09	LOC102724719	FETAL-BIASED
-1.57	-3.14	0.001972	0.002663	WHAMMP1	FETAL-BIASED
-1.56	-19.7	1.432e-46	1.158e-44	HIST1H3H	FETAL-BIASED
-1.56	-15.16	7.251e-34	8.485e-33	SLITRK1	FETAL-BIASED
-1.56	-12.47	4.731e-26	2.607e-25	LOC101929130	FETAL-BIASED
-1.56	-10.21	1.471e-19	5.135e-19	SGCD	FETAL-BIASED
-1.56	-9.37	3.311e-17	1.003e-16	HSPB3	FETAL-BIASED
-1.56	-8.14	6.603e-14	1.653e-13	ASB4	FETAL-BIASED
-1.56	-7.9	2.747e-13	6.666e-13	PEX5L-AS2	FETAL-BIASED
-1.56	-5.64	6.729e-08	1.198e-07	NAALADL2-AS3	FETAL-BIASED
-1.55	-19.43	7.513e-46	5.165e-44	ZNF793	FETAL-BIASED
-1.55	-17.84	1.747e-41	5.574e-40	HIST1H3D	FETAL-BIASED
-1.55	-17.84	1.747e-41	5.574e-40	HIST1H2AD	FETAL-BIASED
-1.55	-16.62	4.796e-38	9.354e-37	FBN2	FETAL-BIASED
-1.55	-14.66	2.025e-32	2.016e-31	HIST1H4L	FETAL-BIASED
-1.55	-14.39	1.207e-31	1.11e-30	LDB2	FETAL-BIASED
-1.55	-13.87	3.903e-30	3.041e-29	RNY4	FETAL-BIASED
-1.55	-13.86	4.281e-30	3.321e-29	LOC730100	FETAL-BIASED
-1.55	-10.07	3.721e-19	1.268e-18	MIR9-2	FETAL-BIASED
-1.55	-9.4	2.707e-17	8.241e-17	LOC646522	FETAL-BIASED
-1.55	-9.26	6.522e-17	1.937e-16	MIR4679-1	FETAL-BIASED
-1.55	-8.59	4.169e-15	1.114e-14	MACC1	FETAL-BIASED
-1.55	-7.76	6.547e-13	1.553e-12	LINC01931	FETAL-BIASED
-1.55	-7.74	7.002e-13	1.658e-12	GBP1	FETAL-BIASED
-1.55	-7.59	1.684e-12	3.905e-12	MIR30B	FETAL-BIASED
-1.55	-7.17	1.989e-11	4.33e-11	SEMA5A-AS1	FETAL-BIASED
-1.55	-2.43	0.0163	0.02023	CT45A3	FETAL-BIASED
-1.54	-19.67	1.642e-46	1.305e-44	ZNF793-AS1	FETAL-BIASED
-1.54	-16.85	1.035e-38	2.181e-37	NFIA	FETAL-BIASED
-1.54	-16.44	1.503e-37	2.752e-36	CTNND1	FETAL-BIASED
-1.54	-15.51	7.093e-35	9.309e-34	HIST1H2AJ	FETAL-BIASED
-1.54	-13.12	6.082e-28	3.897e-27	CSMD3	FETAL-BIASED
-1.54	-6.84	1.235e-10	2.568e-10	SOX6	FETAL-BIASED
-1.54	-6.22	3.543e-09	6.786e-09	LOC403323	FETAL-BIASED
-1.54	-5.86	2.186e-08	4.007e-08	GFRAL	FETAL-BIASED
-1.53	-13.97	2.015e-30	1.617e-29	HIST1H4J	FETAL-BIASED
-1.53	-13.64	1.824e-29	1.333e-28	NRXN1	FETAL-BIASED
-1.53	-12.17	3.406e-25	1.763e-24	KCNH7	FETAL-BIASED
-1.53	-10.27	9.782e-20	3.447e-19	AKAP6	FETAL-BIASED
-1.53	-9.49	1.484e-17	4.586e-17	FLJ41200	FETAL-BIASED
-1.53	-7.79	5.244e-13	1.251e-12	CD36	FETAL-BIASED
-1.52	-20.96	6.296e-50	1.16e-47	LINC00998	FETAL-BIASED
-1.52	-19.92	3.6e-47	3.329e-45	CRISPLD1	FETAL-BIASED
-1.52	-18.04	4.838e-42	1.731e-40	MMP16	FETAL-BIASED
-1.52	-16.72	2.554e-38	5.133e-37	HIST1H3B	FETAL-BIASED
-1.52	-15.99	3.019e-36	4.73e-35	SESN3	FETAL-BIASED
-1.52	-14.45	8.449e-32	7.911e-31	SNORD118	FETAL-BIASED
-1.52	-12.63	1.652e-26	9.419e-26	GLRA2	FETAL-BIASED
-1.52	-9.88	1.233e-18	4.068e-18	GABRG2	FETAL-BIASED
-1.52	-9.58	8.817e-18	2.759e-17	LINC00670	FETAL-BIASED
-1.52	-8.61	3.853e-15	1.032e-14	DMD	FETAL-BIASED
-1.52	-8.05	1.165e-13	2.883e-13	LOC101927179	FETAL-BIASED
-1.52	-6.84	1.203e-10	2.503e-10	SNORA1	FETAL-BIASED
-1.52	-2.32	0.02144	0.02635	AMY1C	FETAL-BIASED
-1.51	-15.67	2.384e-35	3.326e-34	ZFHX4	FETAL-BIASED
-1.51	-15.25	3.904e-34	4.692e-33	HIST1H2BM	FETAL-BIASED
-1.51	-13.67	1.51e-29	1.111e-28	CNTN5	FETAL-BIASED
-1.51	-13.48	5.579e-29	3.902e-28	CD200	FETAL-BIASED
-1.51	-12.71	9.442e-27	5.467e-26	LOC400940	FETAL-BIASED
-1.51	-11.8	4.192e-24	2.002e-23	BUB1B-PAK6	FETAL-BIASED
-1.51	-11.28	1.31e-22	5.613e-22	LOC100506406	FETAL-BIASED
-1.51	-9.58	8.481e-18	2.657e-17	C8orf4	FETAL-BIASED
-1.51	-9.07	2.206e-16	6.354e-16	SASH1	FETAL-BIASED
-1.51	-8.63	3.417e-15	9.183e-15	RMST	FETAL-BIASED
-1.51	-8.62	3.518e-15	9.449e-15	LOC100507616	FETAL-BIASED
-1.51	-7.01	4.685e-11	9.995e-11	N4BP2L2-IT2	FETAL-BIASED
-1.51	-5.86	2.172e-08	3.982e-08	SNORA107	FETAL-BIASED
-1.51	-2.74	0.006743	0.008632	LOC100505824	FETAL-BIASED
-1.5	-14.59	3.312e-32	3.219e-31	FAM196B	FETAL-BIASED
-1.5	-14.51	5.645e-32	5.36e-31	CTXN2	FETAL-BIASED
-1.5	-11.26	1.532e-22	6.527e-22	CAPSL	FETAL-BIASED
-1.5	-11.26	1.513e-22	6.447e-22	SMC2-AS1	FETAL-BIASED
-1.5	-11.06	5.807e-22	2.371e-21	HNMT	FETAL-BIASED
-1.5	-9.07	2.113e-16	6.096e-16	ABCG2	FETAL-BIASED
-1.5	-8.72	1.911e-15	5.215e-15	SNORA98	FETAL-BIASED
-1.5	-6.62	4.039e-10	8.149e-10	OTOGL	FETAL-BIASED
-1.49	-9.1	1.763e-16	5.111e-16	LOC102724776	FETAL-BIASED
-1.49	-8.73	1.796e-15	4.911e-15	WDR49	FETAL-BIASED
-1.49	-6.71	2.487e-10	5.077e-10	SNORA8	FETAL-BIASED
-1.49	-5.34	2.849e-07	4.881e-07	LINC00992	FETAL-BIASED
-1.48	-19.67	1.679e-46	1.326e-44	AGPAT4	FETAL-BIASED
-1.48	-17.5	1.536e-40	4.199e-39	HIST1H2BB	FETAL-BIASED
-1.48	-16.35	2.796e-37	4.947e-36	IGF2BP1	FETAL-BIASED
-1.48	-16.2	7.655e-37	1.287e-35	LINC01535	FETAL-BIASED
-1.48	-9.33	4.233e-17	1.273e-16	LINC01479	FETAL-BIASED
-1.48	-8.85	8.624e-16	2.407e-15	MIR3666	FETAL-BIASED
-1.48	-8.75	1.611e-15	4.417e-15	LOC101927248	FETAL-BIASED
-1.48	-5.04	1.126e-06	1.864e-06	LOC101929529	FETAL-BIASED
-1.48	-3.31	0.001132	0.001553	LINC01722	FETAL-BIASED
-1.47	-18.35	6.81e-43	2.774e-41	RIOK2	FETAL-BIASED
-1.47	-17.81	2.077e-41	6.488e-40	GPATCH2	FETAL-BIASED
-1.47	-11.2	2.27e-22	9.559e-22	MIR137HG	FETAL-BIASED
-1.47	-10.32	7.444e-20	2.648e-19	PLA2G4A	FETAL-BIASED
-1.47	-9.84	1.589e-18	5.217e-18	IFI16	FETAL-BIASED
-1.47	-7.92	2.497e-13	6.071e-13	MIR620	FETAL-BIASED
-1.47	-7.6	1.614e-12	3.745e-12	LOC101927374	FETAL-BIASED
-1.47	-6.19	3.944e-09	7.537e-09	ENPP3	FETAL-BIASED
-1.46	-24.02	1.002e-57	1.81e-54	EPHA7	FETAL-BIASED
-1.46	-16.52	9.219e-38	1.736e-36	HIST1H2BD	FETAL-BIASED
-1.46	-16.03	2.292e-36	3.638e-35	RBMS2	FETAL-BIASED
-1.46	-9.08	2.037e-16	5.886e-16	KLHL41	FETAL-BIASED
-1.46	-9	3.289e-16	9.392e-16	CARD6	FETAL-BIASED
-1.46	-8.97	4.016e-16	1.143e-15	LINC01599	FETAL-BIASED
-1.46	-8.91	5.967e-16	1.683e-15	LOC646241	FETAL-BIASED
-1.46	-8.85	8.414e-16	2.351e-15	FOXG1-AS1	FETAL-BIASED
-1.46	-8.33	2.116e-14	5.447e-14	KLHL31	FETAL-BIASED
-1.46	-7.78	5.82e-13	1.385e-12	MIR4794	FETAL-BIASED
-1.46	-7.8	4.92e-13	1.176e-12	NHLH2	FETAL-BIASED
-1.46	-5.99	1.15e-08	2.141e-08	IMPG2	FETAL-BIASED
-1.46	-5.31	3.302e-07	5.637e-07	LINC01327	FETAL-BIASED
-1.46	-5.22	5.027e-07	8.492e-07	PRR27	FETAL-BIASED
-1.45	-17.63	6.794e-41	1.954e-39	SPATA17	FETAL-BIASED
-1.45	-15.63	3.146e-35	4.324e-34	OLFML3	FETAL-BIASED
-1.45	-14.59	3.127e-32	3.047e-31	LRFN5	FETAL-BIASED
-1.45	-12.18	3.388e-25	1.755e-24	PTN	FETAL-BIASED
-1.45	-11.12	3.825e-22	1.582e-21	LOC105374428	FETAL-BIASED
-1.45	-10.81	2.89e-21	1.126e-20	ROBO1	FETAL-BIASED
-1.45	-10.65	8.138e-21	3.087e-20	C3orf67-AS1	FETAL-BIASED
-1.45	-9.24	7.605e-17	2.251e-16	LINC01490	FETAL-BIASED
-1.45	-8.94	4.985e-16	1.412e-15	CTSS	FETAL-BIASED
-1.45	-7.62	1.49e-12	3.463e-12	MYL4	FETAL-BIASED
-1.45	-7.54	2.292e-12	5.276e-12	KYNU	FETAL-BIASED
-1.45	-5.74	3.99e-08	7.199e-08	SCARNA18	FETAL-BIASED
-1.44	-11.66	1.034e-23	4.789e-23	FER1L6-AS1	FETAL-BIASED
-1.44	-8.88	7.232e-16	2.029e-15	C1QTNF3	FETAL-BIASED
-1.44	-8.8	1.157e-15	3.202e-15	LOC101928696	FETAL-BIASED
-1.44	-8.71	2.007e-15	5.467e-15	LOC101927668	FETAL-BIASED
-1.44	-8.14	6.452e-14	1.617e-13	CDH9	FETAL-BIASED
-1.44	-7.88	3.114e-13	7.524e-13	CELF2	FETAL-BIASED
-1.43	-11.73	6.749e-24	3.172e-23	LOC339593	FETAL-BIASED
-1.43	-11.52	2.627e-23	1.183e-22	BTN3A2	FETAL-BIASED
-1.43	-10.51	2.091e-20	7.711e-20	LINC00939	FETAL-BIASED
-1.43	-9.82	1.884e-18	6.164e-18	LOC101928519	FETAL-BIASED
-1.43	-9.57	9.455e-18	2.952e-17	CNTNAP4	FETAL-BIASED
-1.43	-6.7	2.675e-10	5.451e-10	LINC01142	FETAL-BIASED
-1.43	-6.63	3.914e-10	7.904e-10	LRRC10	FETAL-BIASED
-1.43	-5.9	1.816e-08	3.344e-08	LOC728673	FETAL-BIASED
-1.43	-5.52	1.173e-07	2.059e-07	RGS13	FETAL-BIASED
-1.42	-22.07	8.022e-53	3.747e-50	ZNF577	FETAL-BIASED
-1.42	-21.94	1.74e-52	7.034e-50	ZNF649-AS1	FETAL-BIASED
-1.42	-21.92	1.926e-52	7.674e-50	NOVA1	FETAL-BIASED
-1.42	-20.95	6.588e-50	1.19e-47	TRAM1L1	FETAL-BIASED
-1.42	-18.91	1.958e-44	1.05e-42	ADGRB3	FETAL-BIASED
-1.42	-17.86	1.59e-41	5.144e-40	HIST1H4H	FETAL-BIASED
-1.42	-17.8	2.22e-41	6.92e-40	MEF2C-AS1	FETAL-BIASED
-1.42	-12.87	3.239e-27	1.946e-26	NR2F2-AS1	FETAL-BIASED
-1.42	-10.3	8.159e-20	2.892e-19	FREM1	FETAL-BIASED
-1.42	-8.73	1.844e-15	5.036e-15	LMOD3	FETAL-BIASED
-1.42	-8.48	8.375e-15	2.202e-14	LOC101929577	FETAL-BIASED
-1.42	-7.32	8.257e-12	1.84e-11	MIR301A	FETAL-BIASED
-1.42	-3.54	0.000513	0.0007199	MIR891B	FETAL-BIASED
-1.41	-17.44	2.348e-40	6.235e-39	CNTNAP2	FETAL-BIASED
-1.41	-17.32	5.045e-40	1.277e-38	HIST1H3I	FETAL-BIASED
-1.41	-15.61	3.743e-35	5.082e-34	SLC2A3	FETAL-BIASED
-1.41	-15.48	8.823e-35	1.147e-33	MORF4L2-AS1	FETAL-BIASED
-1.41	-14.72	1.315e-32	1.335e-31	MPZL3	FETAL-BIASED
-1.41	-12.47	4.6e-26	2.538e-25	LINC02036	FETAL-BIASED
-1.41	-11.92	1.824e-24	8.94e-24	GLRA3	FETAL-BIASED
-1.41	-11.31	1.072e-22	4.621e-22	MASP1	FETAL-BIASED
-1.41	-11.1	4.265e-22	1.758e-21	LINC00705	FETAL-BIASED
-1.41	-9.96	7.488e-19	2.504e-18	LINC01919	FETAL-BIASED
-1.41	-9.91	1.009e-18	3.347e-18	LRRC4C	FETAL-BIASED
-1.41	-8.01	1.455e-13	3.581e-13	LOC100506098	FETAL-BIASED
-1.41	-7.82	4.411e-13	1.057e-12	KRTAP19-1	FETAL-BIASED
-1.41	-6.75	2.041e-10	4.189e-10	DKFZP586I1420	FETAL-BIASED
-1.41	-6.01	1.051e-08	1.962e-08	SNORA25	FETAL-BIASED
-1.4	-21.92	1.96e-52	7.695e-50	LINC00665	FETAL-BIASED
-1.4	-18.56	1.761e-43	8.058e-42	BCL11A	FETAL-BIASED
-1.4	-17.94	9.49e-42	3.202e-40	PNISR	FETAL-BIASED
-1.4	-17.06	2.748e-39	6.28e-38	HIST1H3G	FETAL-BIASED
-1.4	-15.88	6.098e-36	9.197e-35	HMP19	FETAL-BIASED
-1.4	-14.94	3.162e-33	3.451e-32	CHM	FETAL-BIASED
-1.4	-11.95	1.529e-24	7.534e-24	LOC100506474	FETAL-BIASED
-1.4	-11.67	1.012e-23	4.692e-23	CEP85L	FETAL-BIASED
-1.4	-11.5	3.118e-23	1.396e-22	RGS4	FETAL-BIASED
-1.4	-9.96	7.52e-19	2.514e-18	RGAG1	FETAL-BIASED
-1.4	-9.96	7.369e-19	2.465e-18	POPDC2	FETAL-BIASED
-1.4	-9.78	2.377e-18	7.723e-18	MIR4289	FETAL-BIASED
-1.4	-9.6	7.629e-18	2.397e-17	SAMD9	FETAL-BIASED
-1.4	-7.72	7.864e-13	1.857e-12	LOC101928322	FETAL-BIASED
-1.4	-7.41	4.82e-12	1.088e-11	ZC2HC1B	FETAL-BIASED
-1.4	-6.74	2.173e-10	4.45e-10	MIR4789	FETAL-BIASED
-1.4	-6.09	6.67e-09	1.259e-08	ENAM	FETAL-BIASED
-1.4	-4.8	3.306e-06	5.328e-06	LOC101928283	FETAL-BIASED
-1.4	-4.25	3.483e-05	5.274e-05	LINC01986	FETAL-BIASED
-1.4	-2.68	0.007952	0.01012	LOC101928437	FETAL-BIASED
-1.39	-19.21	3.069e-45	1.942e-43	LOC101928307	FETAL-BIASED
-1.39	-18.31	8.497e-43	3.42e-41	HIST1H2AK	FETAL-BIASED
-1.39	-17.06	2.76e-39	6.294e-38	HIST1H2AB	FETAL-BIASED
-1.39	-11.17	2.778e-22	1.162e-21	ZNF540	FETAL-BIASED
-1.39	-11.09	4.701e-22	1.931e-21	CC2D2A	FETAL-BIASED
-1.39	-9.27	6.194e-17	1.843e-16	DNAJC12	FETAL-BIASED
-1.39	-7.54	2.368e-12	5.443e-12	LINC01091	FETAL-BIASED
-1.39	-7.51	2.82e-12	6.452e-12	MIR125B2	FETAL-BIASED
-1.39	-7.41	4.799e-12	1.084e-11	ATP2B1	FETAL-BIASED
-1.39	-6.1	6.533e-09	1.234e-08	MIR591	FETAL-BIASED
-1.39	-5.77	3.463e-08	6.27e-08	DEFB113	FETAL-BIASED
-1.39	-5.41	2.019e-07	3.49e-07	MIR3974	FETAL-BIASED
-1.39	-2.05	0.04166	0.04979	MRC1	FETAL-BIASED
-1.38	-19.28	1.877e-45	1.231e-43	MARCKS	FETAL-BIASED
-1.38	-18.72	6.541e-44	3.175e-42	TRAPPC13	FETAL-BIASED
-1.38	-16.78	1.686e-38	3.471e-37	RNU6-8	FETAL-BIASED
-1.38	-16.43	1.632e-37	2.976e-36	RPL35A	FETAL-BIASED
-1.38	-13.87	3.945e-30	3.07e-29	NFKBIZ	FETAL-BIASED
-1.38	-10.72	5.188e-21	1.992e-20	LINC02076	FETAL-BIASED
-1.38	-9.54	1.09e-17	3.396e-17	LINC01082	FETAL-BIASED
-1.38	-9.37	3.3e-17	9.997e-17	SLC9A9	FETAL-BIASED
-1.38	-9.14	1.36e-16	3.964e-16	SLC4A10	FETAL-BIASED
-1.38	-9.07	2.164e-16	6.237e-16	C4orf51	FETAL-BIASED
-1.38	-6.39	1.437e-09	2.813e-09	LOC105369893	FETAL-BIASED
-1.38	-3.34	0.001017	0.001401	SNORD3D	FETAL-BIASED
-1.37	-16.98	4.647e-39	1.024e-37	HIST1H3C	FETAL-BIASED
-1.37	-15.54	5.783e-35	7.68e-34	RNY3	FETAL-BIASED
-1.37	-12.85	3.769e-27	2.251e-26	SOGA3	FETAL-BIASED
-1.37	-11.68	9.014e-24	4.197e-23	ZFHX4-AS1	FETAL-BIASED
-1.37	-8.05	1.112e-13	2.755e-13	EGLN1	FETAL-BIASED
-1.37	-7.7	8.876e-13	2.09e-12	EMCN	FETAL-BIASED
-1.37	-5.95	1.407e-08	2.605e-08	IL2	FETAL-BIASED
-1.37	-5.48	1.466e-07	2.557e-07	AFP	FETAL-BIASED
-1.37	-2.18	0.03087	0.03738	RIMBP3B	FETAL-BIASED
-1.36	-18.09	3.49e-42	1.278e-40	BCL9	FETAL-BIASED
-1.36	-17.95	8.562e-42	2.925e-40	PABPC4L	FETAL-BIASED
-1.36	-17.08	2.342e-39	5.405e-38	FAM133A	FETAL-BIASED
-1.36	-17.05	2.809e-39	6.39e-38	LOC101927365	FETAL-BIASED
-1.36	-14.34	1.686e-31	1.526e-30	LINC01278	FETAL-BIASED
-1.36	-12	1.111e-24	5.521e-24	TPH2	FETAL-BIASED
-1.36	-9.76	2.772e-18	8.968e-18	SULF1	FETAL-BIASED
-1.36	-8.75	1.598e-15	4.382e-15	EVI5	FETAL-BIASED
-1.36	-6.16	4.795e-09	9.127e-09	MKRN3	FETAL-BIASED
-1.35	-18.71	7.031e-44	3.401e-42	TRIM23	FETAL-BIASED
-1.35	-17.73	3.494e-41	1.055e-39	NCAM1	FETAL-BIASED
-1.35	-15.19	5.955e-34	7.035e-33	MBNL2	FETAL-BIASED
-1.35	-11.06	5.705e-22	2.33e-21	CHRM2	FETAL-BIASED
-1.35	-10.87	1.923e-21	7.578e-21	MIR4633	FETAL-BIASED
-1.35	-7.35	6.899e-12	1.545e-11	MIR2052	FETAL-BIASED
-1.35	-7.23	1.412e-11	3.1e-11	MYH15	FETAL-BIASED
-1.35	-6.25	2.975e-09	5.722e-09	TMPRSS11E	FETAL-BIASED
-1.35	-5.64	6.666e-08	1.187e-07	LOC340107	FETAL-BIASED
-1.35	-2.95	0.003587	0.004743	MIR1912	FETAL-BIASED
-1.35	-2.34	0.02047	0.02521	HSFY2	FETAL-BIASED
-1.34	-18.67	9.143e-44	4.345e-42	DNAJB4	FETAL-BIASED
-1.34	-18.21	1.617e-42	6.258e-41	MRPL1	FETAL-BIASED
-1.34	-17.19	1.191e-39	2.831e-38	FANCM	FETAL-BIASED
-1.34	-17.01	3.753e-39	8.389e-38	SNAP25-AS1	FETAL-BIASED
-1.34	-15.99	2.899e-36	4.548e-35	HIST1H2BK	FETAL-BIASED
-1.34	-15.03	1.759e-33	1.969e-32	LINC01322	FETAL-BIASED
-1.34	-9.18	1.059e-16	3.106e-16	GBP3	FETAL-BIASED
-1.34	-8.92	5.676e-16	1.601e-15	LOC145845	FETAL-BIASED
-1.34	-8.71	2.054e-15	5.591e-15	MIR325HG	FETAL-BIASED
-1.34	-7.83	4.197e-13	1.007e-12	LOC101927854	FETAL-BIASED
-1.34	-7.77	6.127e-13	1.456e-12	MIR4714	FETAL-BIASED
-1.34	-7.73	7.436e-13	1.758e-12	MIR3660	FETAL-BIASED
-1.34	-7.39	5.652e-12	1.272e-11	KCNK2	FETAL-BIASED
-1.34	-6.5	7.867e-10	1.564e-09	LINC01551	FETAL-BIASED
-1.34	-6.36	1.652e-09	3.22e-09	P2RY12	FETAL-BIASED
-1.34	-3.88	0.0001464	0.0002135	HCG4B	FETAL-BIASED
-1.33	-20.31	3.252e-48	3.863e-46	WNK3	FETAL-BIASED
-1.33	-20.2	6.422e-48	7.218e-46	LOC731157	FETAL-BIASED
-1.33	-18.96	1.465e-44	8.199e-43	WDR75	FETAL-BIASED
-1.33	-18.81	3.635e-44	1.841e-42	ARRDC3	FETAL-BIASED
-1.33	-18.62	1.208e-43	5.639e-42	FUBP1	FETAL-BIASED
-1.33	-17.28	6.693e-40	1.65e-38	NEIL3	FETAL-BIASED
-1.33	-14.98	2.399e-33	2.655e-32	SPRY1	FETAL-BIASED
-1.33	-14.78	9.339e-33	9.655e-32	ZNF883	FETAL-BIASED
-1.33	-12.03	8.733e-25	4.378e-24	IFIT3	FETAL-BIASED
-1.33	-10.86	2.158e-21	8.471e-21	LINC00970	FETAL-BIASED
-1.33	-10.25	1.183e-19	4.147e-19	ACPP	FETAL-BIASED
-1.33	-10.2	1.591e-19	5.54e-19	LOC100130880	FETAL-BIASED
-1.33	-8.6	4.123e-15	1.103e-14	CNTN6	FETAL-BIASED
-1.33	-7.97	1.893e-13	4.636e-13	RGS1	FETAL-BIASED
-1.33	-6.47	9.19e-10	1.819e-09	LINC01350	FETAL-BIASED
-1.33	-6.46	9.52e-10	1.882e-09	FAS-AS1	FETAL-BIASED
-1.32	-20.55	7.382e-49	9.998e-47	DSE	FETAL-BIASED
-1.32	-20.13	9.772e-48	1.042e-45	CETN3	FETAL-BIASED
-1.32	-19.56	3.438e-46	2.51e-44	MORF4L2	FETAL-BIASED
-1.32	-18.31	8.551e-43	3.432e-41	ZRANB2	FETAL-BIASED
-1.32	-18.21	1.63e-42	6.297e-41	ZRANB2-AS2	FETAL-BIASED
-1.32	-17.84	1.73e-41	5.539e-40	TIMM9	FETAL-BIASED
-1.32	-14.42	9.971e-32	9.26e-31	FGF12	FETAL-BIASED
-1.32	-10.67	7.381e-21	2.806e-20	TMEM196	FETAL-BIASED
-1.32	-7.64	1.28e-12	2.986e-12	UNC13C	FETAL-BIASED
-1.32	-6.74	2.185e-10	4.474e-10	CHRM5	FETAL-BIASED
-1.32	-6.59	4.891e-10	9.826e-10	ZBTB20-AS3	FETAL-BIASED
-1.32	-6.09	6.811e-09	1.285e-08	MIR630	FETAL-BIASED
-1.32	-5.87	2.053e-08	3.767e-08	MIR548AS	FETAL-BIASED
-1.31	-20.55	7.426e-49	1.001e-46	TSPYL4	FETAL-BIASED
-1.31	-18.05	4.683e-42	1.68e-40	CWF19L2	FETAL-BIASED
-1.31	-16.58	6.38e-38	1.225e-36	NAP1L3	FETAL-BIASED
-1.31	-15.89	5.737e-36	8.677e-35	SLX4IP	FETAL-BIASED
-1.31	-15.59	4.114e-35	5.553e-34	EGFEM1P	FETAL-BIASED
-1.31	-15.53	6.348e-35	8.368e-34	HIST1H4C	FETAL-BIASED
-1.31	-15.23	4.429e-34	5.28e-33	HIST1H2BE	FETAL-BIASED
-1.31	-15.04	1.555e-33	1.754e-32	C6orf118	FETAL-BIASED
-1.31	-14.76	1.01e-32	1.038e-31	EPHA5	FETAL-BIASED
-1.31	-8.36	1.793e-14	4.636e-14	IFI44L	FETAL-BIASED
-1.31	-7.12	2.62e-11	5.665e-11	RUNX2	FETAL-BIASED
-1.31	-6.95	6.563e-11	1.387e-10	WARS2-IT1	FETAL-BIASED
-1.31	-5.2	5.442e-07	9.179e-07	LIPN	FETAL-BIASED
-1.3	-18.84	2.951e-44	1.528e-42	GNB4	FETAL-BIASED
-1.3	-16.42	1.718e-37	3.11e-36	CWC22	FETAL-BIASED
-1.3	-12.78	5.844e-27	3.437e-26	MYOF	FETAL-BIASED
-1.3	-10.74	4.761e-21	1.83e-20	LINC01415	FETAL-BIASED
-1.3	-9.24	7.327e-17	2.17e-16	RANBP3L	FETAL-BIASED
-1.3	-7.67	1.078e-12	2.526e-12	CSRP3	FETAL-BIASED
-1.3	-7.53	2.39e-12	5.492e-12	LOC105369423	FETAL-BIASED
-1.3	-6.4	1.339e-09	2.627e-09	SNORD6	FETAL-BIASED
-1.3	-6.12	5.757e-09	1.091e-08	LOC105374516	FETAL-BIASED
-1.3	-6.06	7.978e-09	1.498e-08	GPR141	FETAL-BIASED
-1.3	-4.98	1.508e-06	2.478e-06	LOC101929579	FETAL-BIASED
-1.3	-3.81	0.0001888	0.0002733	CFHR4	FETAL-BIASED
-1.29	-19.31	1.549e-45	1.028e-43	TRIM59	FETAL-BIASED
-1.29	-18.55	1.945e-43	8.811e-42	PKIA	FETAL-BIASED
-1.29	-18.15	2.426e-42	9.091e-41	TRIM2	FETAL-BIASED
-1.29	-16.54	7.985e-38	1.516e-36	ITGB3BP	FETAL-BIASED
-1.29	-16.49	1.133e-37	2.116e-36	EFCAB7	FETAL-BIASED
-1.29	-16.2	7.636e-37	1.285e-35	SNORD13	FETAL-BIASED
-1.29	-15.31	2.71e-34	3.325e-33	TTI2	FETAL-BIASED
-1.29	-15.15	7.753e-34	9.025e-33	SREK1IP1	FETAL-BIASED
-1.29	-14.55	4.129e-32	3.972e-31	CCNB1IP1	FETAL-BIASED
-1.29	-13.12	6.222e-28	3.981e-27	THSD7A	FETAL-BIASED
-1.29	-11.69	8.609e-24	4.013e-23	BTN3A1	FETAL-BIASED
-1.29	-9.6	7.628e-18	2.397e-17	ANKRD55	FETAL-BIASED
-1.29	-9.49	1.541e-17	4.758e-17	LINC01080	FETAL-BIASED
-1.29	-8.62	3.53e-15	9.481e-15	KIAA0408	FETAL-BIASED
-1.29	-7.59	1.71e-12	3.962e-12	HRAT56	FETAL-BIASED
-1.29	-7.49	3.088e-12	7.051e-12	SNORD44	FETAL-BIASED
-1.29	-6.18	4.27e-09	8.149e-09	MNDA	FETAL-BIASED
-1.29	-5.85	2.306e-08	4.221e-08	LOC644285	FETAL-BIASED
-1.29	-5.34	2.843e-07	4.873e-07	LINC00648	FETAL-BIASED
-1.29	-2.33	0.02068	0.02545	LOC100996415	FETAL-BIASED
-1.28	-22.59	3.875e-54	2.385e-51	DZIP3	FETAL-BIASED
-1.28	-19.82	6.719e-47	5.884e-45	SMARCAD1	FETAL-BIASED
-1.28	-18.73	5.978e-44	2.918e-42	ZNF432	FETAL-BIASED
-1.28	-17.47	1.89e-40	5.104e-39	KIAA0586	FETAL-BIASED
-1.28	-16.34	2.912e-37	5.13e-36	ETV1	FETAL-BIASED
-1.28	-15.95	3.761e-36	5.813e-35	MEIS1	FETAL-BIASED
-1.28	-15.11	1.011e-33	1.162e-32	KRR1	FETAL-BIASED
-1.28	-14.75	1.125e-32	1.151e-31	ZNF226	FETAL-BIASED
-1.28	-14.55	4.092e-32	3.939e-31	CSTF2T	FETAL-BIASED
-1.28	-11.12	3.768e-22	1.56e-21	IFIT1	FETAL-BIASED
-1.28	-9.11	1.67e-16	4.847e-16	LINC00461	FETAL-BIASED
-1.28	-8.29	2.623e-14	6.717e-14	HIF1A-AS2	FETAL-BIASED
-1.28	-8.22	4.201e-14	1.064e-13	MID1	FETAL-BIASED
-1.28	-7.54	2.362e-12	5.43e-12	LINC00641	FETAL-BIASED
-1.28	-7.49	3.073e-12	7.019e-12	NPPA	FETAL-BIASED
-1.28	-6.61	4.342e-10	8.743e-10	MIR320C1	FETAL-BIASED
-1.28	-6.3	2.239e-09	4.336e-09	MIR599	FETAL-BIASED
-1.28	-5.88	2.003e-08	3.678e-08	TMPRSS15	FETAL-BIASED
-1.28	-5.49	1.394e-07	2.435e-07	EPYC	FETAL-BIASED
-1.28	-5.48	1.411e-07	2.463e-07	APOBEC4	FETAL-BIASED
-1.28	-5.21	5.242e-07	8.848e-07	MIR8054	FETAL-BIASED
-1.28	-5.19	5.741e-07	9.669e-07	NCOA1	FETAL-BIASED
-1.28	-2.59	0.01049	0.01323	USP17L5	FETAL-BIASED
-1.27	-22.56	4.563e-54	2.747e-51	KIAA1524	FETAL-BIASED
-1.27	-19.74	1.106e-46	9.077e-45	LOC101929210	FETAL-BIASED
-1.27	-17.38	3.397e-40	8.823e-39	SOX4	FETAL-BIASED
-1.27	-16.85	1.088e-38	2.284e-37	ZSCAN26	FETAL-BIASED
-1.27	-16	2.742e-36	4.315e-35	DACH1	FETAL-BIASED
-1.27	-15.46	9.632e-35	1.247e-33	RNU6-7	FETAL-BIASED
-1.27	-15.12	9.185e-34	1.061e-32	HIST1H2AH	FETAL-BIASED
-1.27	-15.05	1.469e-33	1.662e-32	ZNF233	FETAL-BIASED
-1.27	-13.39	9.927e-29	6.801e-28	PABPC5	FETAL-BIASED
-1.27	-13.27	2.176e-28	1.45e-27	GOLPH3L	FETAL-BIASED
-1.27	-11.36	7.913e-23	3.442e-22	GNG11	FETAL-BIASED
-1.27	-10.71	5.62e-21	2.152e-20	ZNF608	FETAL-BIASED
-1.27	-9.69	4.37e-18	1.394e-17	GPR183	FETAL-BIASED
-1.27	-8.11	8.131e-14	2.026e-13	LINC02015	FETAL-BIASED
-1.27	-7.88	3.219e-13	7.774e-13	HIST2H2BC	FETAL-BIASED
-1.27	-7.46	3.743e-12	8.504e-12	MIR548H3	FETAL-BIASED
-1.27	-7.33	7.662e-12	1.711e-11	LOC100506071	FETAL-BIASED
-1.27	-6.91	8.228e-11	1.729e-10	PTPRB	FETAL-BIASED
-1.27	-6.05	8.209e-09	1.54e-08	HOXA2	FETAL-BIASED
-1.26	-20.53	8.605e-49	1.148e-46	ZNF880	FETAL-BIASED
-1.26	-19.77	8.968e-47	7.498e-45	SKIDA1	FETAL-BIASED
-1.26	-19.13	4.986e-45	3.07e-43	CRADD	FETAL-BIASED
-1.26	-18.51	2.441e-43	1.082e-41	MAP9	FETAL-BIASED
-1.26	-16.34	2.901e-37	5.116e-36	HIST1H2BI	FETAL-BIASED
-1.26	-15.08	1.195e-33	1.362e-32	CWC27	FETAL-BIASED
-1.26	-12.54	2.981e-26	1.664e-25	LOC101928162	FETAL-BIASED
-1.26	-10.86	2.159e-21	8.476e-21	CYYR1	FETAL-BIASED
-1.26	-10.17	1.926e-19	6.675e-19	CALD1	FETAL-BIASED
-1.26	-9.74	3.138e-18	1.011e-17	FHL2	FETAL-BIASED
-1.26	-8.59	4.429e-15	1.182e-14	GARNL3	FETAL-BIASED
-1.26	-7.16	2.058e-11	4.476e-11	C7orf62	FETAL-BIASED
-1.26	-6.92	7.963e-11	1.675e-10	CPB1	FETAL-BIASED
-1.26	-6.74	2.119e-10	4.346e-10	MEOX2-AS1	FETAL-BIASED
-1.26	-5.18	6.023e-07	1.013e-06	LINC01697	FETAL-BIASED
-1.25	-19.23	2.625e-45	1.685e-43	FAM229B	FETAL-BIASED
-1.25	-19.23	2.68e-45	1.712e-43	TUBE1	FETAL-BIASED
-1.25	-17.83	1.862e-41	5.879e-40	HIST1H2AM	FETAL-BIASED
-1.25	-17.83	1.925e-41	6.048e-40	HIST1H2BO	FETAL-BIASED
-1.25	-16.26	4.976e-37	8.541e-36	HIST1H2BJ	FETAL-BIASED
-1.25	-14.88	4.74e-33	5.097e-32	VCAN	FETAL-BIASED
-1.25	-12.02	9.325e-25	4.661e-24	FLRT2	FETAL-BIASED
-1.25	-9.79	2.244e-18	7.307e-18	STC1	FETAL-BIASED
-1.25	-9.22	8.283e-17	2.447e-16	GABRA3	FETAL-BIASED
-1.25	-6.93	7.49e-11	1.578e-10	EIF1AX-AS1	FETAL-BIASED
-1.25	-6.73	2.196e-10	4.496e-10	LINC01037	FETAL-BIASED
-1.25	-5.89	1.922e-08	3.535e-08	MIR128-1	FETAL-BIASED
-1.24	-19.59	2.809e-46	2.102e-44	ENC1	FETAL-BIASED
-1.24	-18.89	2.271e-44	1.201e-42	TUBA1A	FETAL-BIASED
-1.24	-18.52	2.256e-43	1.008e-41	ZNF229	FETAL-BIASED
-1.24	-16.25	5.401e-37	9.178e-36	HDX	FETAL-BIASED
-1.24	-15.25	3.991e-34	4.786e-33	MAGT1	FETAL-BIASED
-1.24	-14.24	3.292e-31	2.872e-30	NCOA7	FETAL-BIASED
-1.24	-12.89	2.919e-27	1.762e-26	ARMCX5-GPRASP2	FETAL-BIASED
-1.24	-12.68	1.187e-26	6.83e-26	GNG2	FETAL-BIASED
-1.24	-12.26	1.968e-25	1.038e-24	ARID5B	FETAL-BIASED
-1.24	-11.94	1.629e-24	8.019e-24	SNORD50B	FETAL-BIASED
-1.24	-11.8	4.166e-24	1.99e-23	MIR3684	FETAL-BIASED
-1.24	-9.4	2.678e-17	8.155e-17	USP54	FETAL-BIASED
-1.24	-8.41	1.317e-14	3.427e-14	NR2F2	FETAL-BIASED
-1.24	-8.22	3.999e-14	1.014e-13	LINC01844	FETAL-BIASED
-1.24	-8.12	7.62e-14	1.902e-13	LOC101927023	FETAL-BIASED
-1.24	-7.89	2.947e-13	7.137e-13	LINC01299	FETAL-BIASED
-1.24	-6.5	7.909e-10	1.571e-09	MIR875	FETAL-BIASED
-1.24	-5.98	1.224e-08	2.277e-08	LINC01708	FETAL-BIASED
-1.24	-5.71	4.713e-08	8.468e-08	LINC00307	FETAL-BIASED
-1.24	-5.02	1.271e-06	2.097e-06	LINC01473	FETAL-BIASED
-1.24	-4.47	1.375e-05	2.135e-05	MTHFD2P1	FETAL-BIASED
-1.24	-4.03	8.194e-05	0.0001213	LINC01608	FETAL-BIASED
-1.24	-3.55	0.0004877	0.0006857	LINC00566	FETAL-BIASED
-1.23	-21.65	1.002e-51	2.951e-49	MTF2	FETAL-BIASED
-1.23	-21.05	3.623e-50	6.815e-48	ZNF667	FETAL-BIASED
-1.23	-17.93	9.894e-42	3.33e-40	HFM1	FETAL-BIASED
-1.23	-17.03	3.28e-39	7.411e-38	HIST1H2BN	FETAL-BIASED
-1.23	-16.24	5.872e-37	9.967e-36	HIST2H2AB	FETAL-BIASED
-1.23	-14.08	9.735e-31	8.062e-30	NLGN1	FETAL-BIASED
-1.23	-7.7	9.286e-13	2.182e-12	LINC01587	FETAL-BIASED
-1.23	-6.28	2.481e-09	4.793e-09	LOC101928135	FETAL-BIASED
-1.23	-5.33	2.948e-07	5.047e-07	TMEM207	FETAL-BIASED
-1.23	-5.13	7.489e-07	1.253e-06	MIR644A	FETAL-BIASED
-1.23	-2.15	0.03297	0.03981	GXYLT1P3	FETAL-BIASED
-1.22	-23.61	1.016e-56	1.259e-53	PRH1	FETAL-BIASED
-1.22	-23.61	1.016e-56	1.259e-53	PRH1-TAS2R14	FETAL-BIASED
-1.22	-23.61	1.022e-56	1.259e-53	PRH1-PRR4	FETAL-BIASED
-1.22	-19.63	2.149e-46	1.677e-44	LCA5	FETAL-BIASED
-1.22	-18.35	6.672e-43	2.722e-41	LOC643072	FETAL-BIASED
-1.22	-18.01	5.937e-42	2.094e-40	ZNF285	FETAL-BIASED
-1.22	-17.52	1.416e-40	3.907e-39	C11orf58	FETAL-BIASED
-1.22	-16.96	5.23e-39	1.143e-37	NONO	FETAL-BIASED
-1.22	-15.71	1.848e-35	2.609e-34	HIST1H4B	FETAL-BIASED
-1.22	-15.08	1.191e-33	1.358e-32	ZNF462	FETAL-BIASED
-1.22	-13.3	1.799e-28	1.208e-27	SKA2	FETAL-BIASED
-1.22	-13.15	5.044e-28	3.254e-27	PRR11	FETAL-BIASED
-1.22	-12.66	1.309e-26	7.513e-26	LINC01132	FETAL-BIASED
-1.22	-11.79	4.419e-24	2.106e-23	ADAMTS12	FETAL-BIASED
-1.22	-11.56	2.105e-23	9.525e-23	DLGAP1-AS2	FETAL-BIASED
-1.22	-11.37	7.294e-23	3.183e-22	PTX3	FETAL-BIASED
-1.22	-9.81	1.943e-18	6.351e-18	TRPC7	FETAL-BIASED
-1.22	-8.78	1.342e-15	3.695e-15	NDP	FETAL-BIASED
-1.22	-8	1.568e-13	3.854e-13	LINC01069	FETAL-BIASED
-1.22	-7.13	2.404e-11	5.208e-11	ATP11C	FETAL-BIASED
-1.22	-6.95	6.602e-11	1.395e-10	LINC01994	FETAL-BIASED
-1.22	-6.82	1.341e-10	2.783e-10	NCRNA00250	FETAL-BIASED
-1.22	-6.75	1.979e-10	4.065e-10	LOC101927296	FETAL-BIASED
-1.22	-6.44	1.089e-09	2.148e-09	MIR548AJ1	FETAL-BIASED
-1.22	-5.91	1.715e-08	3.161e-08	MIR3171	FETAL-BIASED
-1.22	-5.62	7.35e-08	1.305e-07	MSTN	FETAL-BIASED
-1.21	-17.33	4.802e-40	1.219e-38	SRFBP1	FETAL-BIASED
-1.21	-16.77	1.753e-38	3.595e-37	TCEAL8	FETAL-BIASED
-1.21	-15.59	4.157e-35	5.603e-34	ZSCAN23	FETAL-BIASED
-1.21	-15.12	9.322e-34	1.075e-32	LINC00643	FETAL-BIASED
-1.21	-14.18	5.018e-31	4.272e-30	PCDH17	FETAL-BIASED
-1.21	-13.98	1.928e-30	1.552e-29	COPS5	FETAL-BIASED
-1.21	-12.96	1.787e-27	1.101e-26	LRRC7	FETAL-BIASED
-1.21	-12.82	4.384e-27	2.606e-26	ARMCX5	FETAL-BIASED
-1.21	-12.48	4.283e-26	2.368e-25	DUSP19	FETAL-BIASED
-1.21	-11.43	4.91e-23	2.172e-22	PXDNL	FETAL-BIASED
-1.21	-9.04	2.599e-16	7.458e-16	CASP10	FETAL-BIASED
-1.21	-8.55	5.617e-15	1.492e-14	LSMEM1	FETAL-BIASED
-1.21	-7.96	2e-13	4.89e-13	PRMT8	FETAL-BIASED
-1.21	-7.58	1.784e-12	4.128e-12	LINC01923	FETAL-BIASED
-1.21	-7.04	4.038e-11	8.644e-11	LINC01099	FETAL-BIASED
-1.21	-6.77	1.844e-10	3.796e-10	LOC101927354	FETAL-BIASED
-1.21	-6.74	2.102e-10	4.314e-10	AIRN	FETAL-BIASED
-1.21	-6.62	4.08e-10	8.229e-10	LOC101927378	FETAL-BIASED
-1.21	-6.44	1.069e-09	2.109e-09	C6	FETAL-BIASED
-1.21	-6.34	1.88e-09	3.655e-09	SNORD132	FETAL-BIASED
-1.21	-6.19	4.02e-09	7.679e-09	OTOR	FETAL-BIASED
-1.21	-5.78	3.214e-08	5.83e-08	TMPRSS11BNL	FETAL-BIASED
-1.21	-4.97	1.578e-06	2.588e-06	CASC17	FETAL-BIASED
-1.21	-4.74	4.358e-06	6.972e-06	KRTAP29-1	FETAL-BIASED
-1.21	-4.54	1.052e-05	1.646e-05	LINC01684	FETAL-BIASED
-1.2	-20.09	1.254e-47	1.312e-45	VPS45	FETAL-BIASED
-1.2	-19.53	4.032e-46	2.882e-44	MRPS33	FETAL-BIASED
-1.2	-19.32	1.54e-45	1.025e-43	MYNN	FETAL-BIASED
-1.2	-19.28	1.924e-45	1.259e-43	ZNF781	FETAL-BIASED
-1.2	-17.58	9.575e-41	2.696e-39	ZNF227	FETAL-BIASED
-1.2	-16.07	1.72e-36	2.781e-35	OSGEPL1-AS1	FETAL-BIASED
-1.2	-16.04	2.078e-36	3.314e-35	OSGEPL1	FETAL-BIASED
-1.2	-15.22	4.762e-34	5.668e-33	ZNF585B	FETAL-BIASED
-1.2	-14.81	7.494e-33	7.832e-32	HIST1H2AI	FETAL-BIASED
-1.2	-13.64	1.892e-29	1.38e-28	HIST1H2BC	FETAL-BIASED
-1.2	-12.49	4.035e-26	2.234e-25	PABPC5-AS1	FETAL-BIASED
-1.2	-11.41	5.56e-23	2.446e-22	SLC9C1	FETAL-BIASED
-1.2	-10.82	2.711e-21	1.058e-20	GUCY1A3	FETAL-BIASED
-1.2	-9.82	1.87e-18	6.117e-18	CHD1	FETAL-BIASED
-1.2	-9.79	2.18e-18	7.106e-18	GPR21	FETAL-BIASED
-1.2	-8.75	1.636e-15	4.484e-15	SNRPN	FETAL-BIASED
-1.2	-8.16	6.038e-14	1.515e-13	SNORD137	FETAL-BIASED
-1.2	-6.43	1.128e-09	2.222e-09	KCNJ13	FETAL-BIASED
-1.2	-5.8	2.986e-08	5.426e-08	MIRLET7C	FETAL-BIASED
-1.2	-2.76	0.006352	0.008149	SNAR-A1	FETAL-BIASED
-1.2	-2.85	0.004877	0.00632	CFHR3	FETAL-BIASED
-1.2	-2.23	0.02674	0.03257	PPIAL4C	FETAL-BIASED
-1.19	-18.08	3.852e-42	1.397e-40	CRB1	FETAL-BIASED
-1.19	-17.93	9.687e-42	3.264e-40	NUP205	FETAL-BIASED
-1.19	-17.51	1.515e-40	4.15e-39	LOC100506885	FETAL-BIASED
-1.19	-17.44	2.359e-40	6.258e-39	ZKSCAN3	FETAL-BIASED
-1.19	-16.61	5.15e-38	9.994e-37	MTTP	FETAL-BIASED
-1.19	-16.54	7.88e-38	1.497e-36	TRMT10A	FETAL-BIASED
-1.19	-15.6	3.897e-35	5.281e-34	MCTS1	FETAL-BIASED
-1.19	-15.61	3.607e-35	4.916e-34	WDR12	FETAL-BIASED
-1.19	-15.61	3.688e-35	5.021e-34	CARF	FETAL-BIASED
-1.19	-15.36	1.871e-34	2.336e-33	ZNF521	FETAL-BIASED
-1.19	-15.34	2.16e-34	2.682e-33	HIST1H2BL	FETAL-BIASED
-1.19	-15.26	3.682e-34	4.441e-33	GIN1	FETAL-BIASED
-1.19	-14.57	3.709e-32	3.589e-31	HIST1H1A	FETAL-BIASED
-1.19	-13.73	1.01e-29	7.527e-29	ZIM2	FETAL-BIASED
-1.19	-13.71	1.13e-29	8.39e-29	PEG3	FETAL-BIASED
-1.19	-10.61	1.097e-20	4.127e-20	MIR6073	FETAL-BIASED
-1.19	-9.29	5.35e-17	1.598e-16	PALMD	FETAL-BIASED
-1.19	-6.96	6.244e-11	1.321e-10	TLR1	FETAL-BIASED
-1.19	-6.52	6.946e-10	1.384e-09	RPA3	FETAL-BIASED
-1.19	-5.54	1.082e-07	1.903e-07	GPC5-AS1	FETAL-BIASED
-1.19	-4.99	1.452e-06	2.389e-06	MIR103A1	FETAL-BIASED
-1.19	-4.86	2.541e-06	4.12e-06	SNORD114-18	FETAL-BIASED
-1.19	-3.56	0.0004773	0.0006716	PCDHA11	FETAL-BIASED
-1.19	-2.38	0.01836	0.0227	GOLGA8DP	FETAL-BIASED
-1.18	-20.19	6.957e-48	7.788e-46	ZNF667-AS1	FETAL-BIASED
-1.18	-19.01	1.076e-44	6.164e-43	CCDC8	FETAL-BIASED
-1.18	-18.81	3.789e-44	1.915e-42	ZFC3H1	FETAL-BIASED
-1.18	-17.85	1.662e-41	5.328e-40	SLC25A53	FETAL-BIASED
-1.18	-17.25	7.973e-40	1.953e-38	SNAI2	FETAL-BIASED
-1.18	-15.79	1.114e-35	1.62e-34	GAS1RR	FETAL-BIASED
-1.18	-15.19	5.748e-34	6.796e-33	PPIP5K2	FETAL-BIASED
-1.18	-12.97	1.682e-27	1.038e-26	LAMA2	FETAL-BIASED
-1.18	-10.55	1.66e-20	6.17e-20	TBC1D5	FETAL-BIASED
-1.18	-9.7	4.117e-18	1.316e-17	ADD3	FETAL-BIASED
-1.18	-9.62	6.748e-18	2.128e-17	MIR573	FETAL-BIASED
-1.18	-9.61	7.298e-18	2.296e-17	DPY19L2P1	FETAL-BIASED
-1.18	-9.38	3.11e-17	9.441e-17	MASCRNA	FETAL-BIASED
-1.18	-9.18	1.076e-16	3.155e-16	LOC101927822	FETAL-BIASED
-1.18	-8.29	2.724e-14	6.965e-14	EGF	FETAL-BIASED
-1.18	-8.26	3.165e-14	8.066e-14	MIR4276	FETAL-BIASED
-1.18	-8.3	2.528e-14	6.478e-14	CASP4	FETAL-BIASED
-1.18	-8.15	6.114e-14	1.534e-13	HNRNPKP3	FETAL-BIASED
-1.18	-7	5.015e-11	1.068e-10	MIR21	FETAL-BIASED
-1.18	-6.31	2.163e-09	4.193e-09	MIR181A1	FETAL-BIASED
-1.18	-6.06	7.854e-09	1.476e-08	SEMA3D	FETAL-BIASED
-1.18	-6	1.064e-08	1.985e-08	CASQ2	FETAL-BIASED
-1.18	-5.58	8.756e-08	1.548e-07	MIR7856	FETAL-BIASED
-1.18	-5.48	1.437e-07	2.508e-07	MIR6755	FETAL-BIASED
-1.18	-2.76	0.006433	0.008248	FAM197Y5P	FETAL-BIASED
-1.17	-18.72	6.296e-44	3.062e-42	THAP2	FETAL-BIASED
-1.17	-18.62	1.21e-43	5.639e-42	SGCE	FETAL-BIASED
-1.17	-17.85	1.657e-41	5.319e-40	GSTA4	FETAL-BIASED
-1.17	-17.45	2.142e-40	5.739e-39	ZNF814	FETAL-BIASED
-1.17	-16.31	3.72e-37	6.477e-36	HIST1H2AG	FETAL-BIASED
-1.17	-14.28	2.546e-31	2.253e-30	RNU11	FETAL-BIASED
-1.17	-14.13	6.968e-31	5.842e-30	WDR89	FETAL-BIASED
-1.17	-14.04	1.25e-30	1.022e-29	HIST1H2AC	FETAL-BIASED
-1.17	-13.91	3.104e-30	2.443e-29	MIR3143	FETAL-BIASED
-1.17	-13.43	7.724e-29	5.339e-28	HECW2	FETAL-BIASED
-1.17	-13.1	7.142e-28	4.546e-27	ZSCAN1	FETAL-BIASED
-1.17	-12.37	9.126e-26	4.935e-25	NGDN	FETAL-BIASED
-1.17	-11.19	2.398e-22	1.008e-21	MIR6068	FETAL-BIASED
-1.17	-10.96	1.069e-21	4.285e-21	GABRB1	FETAL-BIASED
-1.17	-10.27	1.008e-19	3.552e-19	NFIA-AS2	FETAL-BIASED
-1.17	-9.49	1.542e-17	4.758e-17	GUSBP2	FETAL-BIASED
-1.17	-9.51	1.32e-17	4.089e-17	GAS2	FETAL-BIASED
-1.17	-9.09	1.909e-16	5.526e-16	SPTLC3	FETAL-BIASED
-1.17	-7.87	3.294e-13	7.954e-13	LINC02126	FETAL-BIASED
-1.17	-6.27	2.724e-09	5.249e-09	PLEKHG7	FETAL-BIASED
-1.17	-5.15	6.911e-07	1.16e-06	LINC01239	FETAL-BIASED
-1.17	-2.83	0.005183	0.0067	LOC100507334	FETAL-BIASED
-1.17	-2.75	0.006542	0.008383	SNAR-A2	FETAL-BIASED
-1.17	-2.15	0.03255	0.03933	LOC389906	FETAL-BIASED
-1.16	-17.24	8.489e-40	2.068e-38	CRYZ	FETAL-BIASED
-1.16	-16.83	1.184e-38	2.48e-37	MAGED2	FETAL-BIASED
-1.16	-15.82	9.265e-36	1.362e-34	IKZF4	FETAL-BIASED
-1.16	-15.66	2.624e-35	3.642e-34	NBAS	FETAL-BIASED
-1.16	-12.12	5.054e-25	2.585e-24	CLVS1	FETAL-BIASED
-1.16	-11.07	5.371e-22	2.197e-21	PCDH20	FETAL-BIASED
-1.16	-10.97	1.011e-21	4.06e-21	DNAH6	FETAL-BIASED
-1.16	-10.21	1.513e-19	5.277e-19	SLC38A4	FETAL-BIASED
-1.16	-10	5.965e-19	2.007e-18	HAS2	FETAL-BIASED
-1.16	-9.47	1.769e-17	5.438e-17	LINC01489	FETAL-BIASED
-1.16	-8.3	2.486e-14	6.374e-14	LINC01788	FETAL-BIASED
-1.16	-7.71	8.389e-13	1.978e-12	HECTD2-AS1	FETAL-BIASED
-1.16	-7.05	3.909e-11	8.377e-11	LOC105369920	FETAL-BIASED
-1.16	-6.96	6.277e-11	1.328e-10	MC2R	FETAL-BIASED
-1.16	-6.64	3.577e-10	7.237e-10	LOC100128317	FETAL-BIASED
-1.16	-6.1	6.367e-09	1.203e-08	MIR181B1	FETAL-BIASED
-1.16	-5.89	1.899e-08	3.493e-08	LINC01687	FETAL-BIASED
-1.16	-5.26	4.09e-07	6.944e-07	A1CF	FETAL-BIASED
-1.16	-5.06	1.055e-06	1.749e-06	MIR1261	FETAL-BIASED
-1.15	-17.45	2.167e-40	5.794e-39	RN7SK	FETAL-BIASED
-1.15	-16.89	8.031e-39	1.717e-37	ATP10D	FETAL-BIASED
-1.15	-16.59	5.832e-38	1.128e-36	MED7	FETAL-BIASED
-1.15	-16.15	1.019e-36	1.688e-35	NSUN3	FETAL-BIASED
-1.15	-16.13	1.224e-36	2.011e-35	NR2F1-AS1	FETAL-BIASED
-1.15	-14.09	9.365e-31	7.77e-30	ZSCAN12	FETAL-BIASED
-1.15	-13.97	1.995e-30	1.601e-29	RNU4-2	FETAL-BIASED
-1.15	-12.64	1.536e-26	8.775e-26	HNRNPA1	FETAL-BIASED
-1.15	-10.92	1.437e-21	5.711e-21	KCNJ8	FETAL-BIASED
-1.15	-9.22	8.732e-17	2.574e-16	PRICKLE2-AS3	FETAL-BIASED
-1.15	-8.7	2.221e-15	6.034e-15	CDH12	FETAL-BIASED
-1.15	-7.36	6.668e-12	1.495e-11	LOC102724933	FETAL-BIASED
-1.15	-7.13	2.435e-11	5.273e-11	MIR3926-2	FETAL-BIASED
-1.15	-6.15	4.922e-09	9.363e-09	LOC101929680	FETAL-BIASED
-1.15	-5.75	3.786e-08	6.842e-08	TMEM108-AS1	FETAL-BIASED
-1.15	-5.28	3.753e-07	6.387e-07	LINC02115	FETAL-BIASED
-1.15	-4.91	2.024e-06	3.298e-06	SNORD114-1	FETAL-BIASED
-1.14	-19.41	8.296e-46	5.689e-44	ZNF660	FETAL-BIASED
-1.14	-17.38	3.5e-40	9.054e-39	PEG10	FETAL-BIASED
-1.14	-17.23	9.149e-40	2.205e-38	ZNF93	FETAL-BIASED
-1.14	-16.25	5.298e-37	9.027e-36	C11orf65	FETAL-BIASED
-1.14	-16.14	1.093e-36	1.804e-35	LMNA	FETAL-BIASED
-1.14	-15.2	5.465e-34	6.471e-33	FBXO16	FETAL-BIASED
-1.14	-15.04	1.633e-33	1.836e-32	TIA1	FETAL-BIASED
-1.14	-14.32	1.905e-31	1.71e-30	COX7A2	FETAL-BIASED
-1.14	-14.24	3.233e-31	2.824e-30	BCL11B	FETAL-BIASED
-1.14	-14.06	1.142e-30	9.386e-30	SNAP25	FETAL-BIASED
-1.14	-13.49	5.23e-29	3.666e-28	LAMA4	FETAL-BIASED
-1.14	-12.87	3.206e-27	1.928e-26	RNF43	FETAL-BIASED
-1.14	-11.41	5.615e-23	2.47e-22	ZNF385D	FETAL-BIASED
-1.14	-11.33	9.528e-23	4.125e-22	ARMC3	FETAL-BIASED
-1.14	-10.35	5.966e-20	2.136e-19	C14orf39	FETAL-BIASED
-1.14	-7.56	2.005e-12	4.626e-12	LINC02027	FETAL-BIASED
-1.14	-6.86	1.073e-10	2.241e-10	MIR3973	FETAL-BIASED
-1.14	-6.69	2.864e-10	5.827e-10	ALDH1A1	FETAL-BIASED
-1.14	-6.55	6.064e-10	1.212e-09	MIR4307HG	FETAL-BIASED
-1.14	-5.32	3.028e-07	5.181e-07	LIPJ	FETAL-BIASED
-1.14	-4.39	1.908e-05	2.935e-05	MIR653	FETAL-BIASED
-1.14	-4.1	6.322e-05	9.425e-05	MIR6130	FETAL-BIASED
-1.14	-3.97	0.0001027	0.0001512	TMEM257	FETAL-BIASED
-1.13	-18.95	1.488e-44	8.275e-43	TBCK	FETAL-BIASED
-1.13	-18.4	4.891e-43	2.07e-41	LOC101927359	FETAL-BIASED
-1.13	-18.34	7.312e-43	2.97e-41	PCDH10	FETAL-BIASED
-1.13	-17.53	1.263e-40	3.502e-39	AASDH	FETAL-BIASED
-1.13	-16.87	9.446e-39	2.004e-37	TYW3	FETAL-BIASED
-1.13	-15.81	9.443e-36	1.384e-34	HIST1H4D	FETAL-BIASED
-1.13	-15.39	1.53e-34	1.925e-33	LOC101928650	FETAL-BIASED
-1.13	-15.14	8.45e-34	9.787e-33	HCG14	FETAL-BIASED
-1.13	-15.01	1.913e-33	2.135e-32	ZNF827	FETAL-BIASED
-1.13	-14.68	1.727e-32	1.737e-31	TCEAL1	FETAL-BIASED
-1.13	-14.04	1.251e-30	1.023e-29	RNU5E-1	FETAL-BIASED
-1.13	-13.76	8.512e-30	6.412e-29	RNY1	FETAL-BIASED
-1.13	-13.73	1.002e-29	7.47e-29	DPY19L2	FETAL-BIASED
-1.13	-13.66	1.597e-29	1.172e-28	GHET1	FETAL-BIASED
-1.13	-13.58	2.847e-29	2.044e-28	ZBBX	FETAL-BIASED
-1.13	-13.48	5.29e-29	3.706e-28	KHDRBS2	FETAL-BIASED
-1.13	-12.36	1.002e-25	5.399e-25	LOC100134868	FETAL-BIASED
-1.13	-12.41	6.906e-26	3.762e-25	CBX5	FETAL-BIASED
-1.13	-10.98	9.362e-22	3.771e-21	CTNND2	FETAL-BIASED
-1.13	-7.92	2.483e-13	6.037e-13	GCNT2	FETAL-BIASED
-1.13	-7.93	2.374e-13	5.778e-13	ZNF714	FETAL-BIASED
-1.13	-7.65	1.222e-12	2.853e-12	LMO7DN	FETAL-BIASED
-1.13	-7.02	4.474e-11	9.551e-11	LOC340017	FETAL-BIASED
-1.13	-6.78	1.745e-10	3.596e-10	MIR4677	FETAL-BIASED
-1.13	-6.47	9.012e-10	1.784e-09	SNORD87	FETAL-BIASED
-1.13	-5.43	1.821e-07	3.157e-07	MIR216B	FETAL-BIASED
-1.13	-5.39	2.207e-07	3.805e-07	TAS2R10	FETAL-BIASED
-1.13	-2.09	0.03784	0.04544	USP17L21	FETAL-BIASED
-1.12	-16.93	6.427e-39	1.386e-37	PSMB1	FETAL-BIASED
-1.12	-16.86	1.004e-38	2.124e-37	N4BP2L2	FETAL-BIASED
-1.12	-15.82	8.844e-36	1.304e-34	MEX3A	FETAL-BIASED
-1.12	-15.71	1.887e-35	2.661e-34	MYCN	FETAL-BIASED
-1.12	-15.69	2.136e-35	2.995e-34	DHFR2	FETAL-BIASED
-1.12	-15.28	3.164e-34	3.843e-33	GORAB	FETAL-BIASED
-1.12	-14.66	2.033e-32	2.024e-31	CLGN	FETAL-BIASED
-1.12	-13.73	1.038e-29	7.729e-29	ATF6	FETAL-BIASED
-1.12	-12.38	8.435e-26	4.572e-25	GRM3	FETAL-BIASED
-1.12	-11.62	1.357e-23	6.217e-23	ZSWIM2	FETAL-BIASED
-1.12	-10.11	2.908e-19	9.976e-19	STARD13	FETAL-BIASED
-1.12	-6.94	6.972e-11	1.471e-10	MIR3926-1	FETAL-BIASED
-1.12	-6.91	8.37e-11	1.758e-10	LINC01695	FETAL-BIASED
-1.12	-6.85	1.168e-10	2.433e-10	LOC102725191	FETAL-BIASED
-1.12	-6.32	2.015e-09	3.91e-09	LOC101928565	FETAL-BIASED
-1.12	-4.46	1.466e-05	2.271e-05	TSHB	FETAL-BIASED
-1.12	-3.96	0.0001102	0.0001619	ASIC5	FETAL-BIASED
-1.11	-20.08	1.329e-47	1.379e-45	RFC3	FETAL-BIASED
-1.11	-19.11	5.618e-45	3.412e-43	LINC00888	FETAL-BIASED
-1.11	-18.02	5.495e-42	1.956e-40	RSRC1	FETAL-BIASED
-1.11	-17.42	2.632e-40	6.955e-39	BRD8	FETAL-BIASED
-1.11	-16.05	1.966e-36	3.149e-35	PPIL3	FETAL-BIASED
-1.11	-16.05	1.999e-36	3.197e-35	MKKS	FETAL-BIASED
-1.11	-15.28	3.212e-34	3.896e-33	CEP44	FETAL-BIASED
-1.11	-14.85	5.517e-33	5.882e-32	PTPRD-AS1	FETAL-BIASED
-1.11	-14.39	1.253e-31	1.15e-30	INTU	FETAL-BIASED
-1.11	-13.78	7.457e-30	5.649e-29	MIR3184	FETAL-BIASED
-1.11	-13.76	8.177e-30	6.17e-29	BPGM	FETAL-BIASED
-1.11	-13.71	1.167e-29	8.643e-29	COPS4	FETAL-BIASED
-1.11	-13.59	2.548e-29	1.837e-28	RNU4-1	FETAL-BIASED
-1.11	-13.44	6.865e-29	4.764e-28	PIGK	FETAL-BIASED
-1.11	-13.1	7.09e-28	4.514e-27	NEXN-AS1	FETAL-BIASED
-1.11	-12.75	7.143e-27	4.178e-26	PPP1R10	FETAL-BIASED
-1.11	-11.37	7.154e-23	3.124e-22	FLJ42969	FETAL-BIASED
-1.11	-10.82	2.788e-21	1.087e-20	ST8SIA2	FETAL-BIASED
-1.11	-10.63	9.578e-21	3.615e-20	CD109	FETAL-BIASED
-1.11	-10.6	1.172e-20	4.396e-20	LOC101928489	FETAL-BIASED
-1.11	-8.39	1.493e-14	3.873e-14	C1orf141	FETAL-BIASED
-1.11	-5.81	2.767e-08	5.038e-08	LINC01340	FETAL-BIASED
-1.11	-5.82	2.72e-08	4.957e-08	BTBD9-AS1	FETAL-BIASED
-1.11	-5.74	3.966e-08	7.158e-08	GPR65	FETAL-BIASED
-1.11	-5.3	3.472e-07	5.92e-07	MIR3942	FETAL-BIASED
-1.11	-4.83	2.996e-06	4.84e-06	SLN	FETAL-BIASED
-1.11	-4.6	8.132e-06	1.281e-05	LOC285762	FETAL-BIASED
-1.11	-4.27	3.153e-05	4.788e-05	MIR576	FETAL-BIASED
-1.11	-4.08	6.761e-05	0.0001006	LINC01611	FETAL-BIASED
-1.11	-4.16	4.994e-05	7.497e-05	LOC646736	FETAL-BIASED
-1.11	-2.92	0.003996	0.005215	FAM74A1	FETAL-BIASED
-1.11	-2.56	0.0112	0.01409	PRAMEF36P	FETAL-BIASED
-1.11	-2.73	0.007042	0.009	FAM86B3P	FETAL-BIASED
-1.1	-20.41	1.73e-48	2.15e-46	EED	FETAL-BIASED
-1.1	-17.63	6.749e-41	1.943e-39	UFM1	FETAL-BIASED
-1.1	-17.6	8.279e-41	2.353e-39	SUGT1	FETAL-BIASED
-1.1	-17.51	1.482e-40	4.075e-39	RPS27A	FETAL-BIASED
-1.1	-17.38	3.324e-40	8.658e-39	KIF20A	FETAL-BIASED
-1.1	-16.6	5.271e-38	1.021e-36	IFT74-AS1	FETAL-BIASED
-1.1	-16.59	5.995e-38	1.155e-36	ALG14	FETAL-BIASED
-1.1	-16.47	1.269e-37	2.35e-36	CLDN12	FETAL-BIASED
-1.1	-16.32	3.303e-37	5.784e-36	NEMF	FETAL-BIASED
-1.1	-15.98	3.135e-36	4.901e-35	BCL6	FETAL-BIASED
-1.1	-15.88	6.14e-36	9.255e-35	NME7	FETAL-BIASED
-1.1	-15.76	1.386e-35	1.987e-34	ZBED8	FETAL-BIASED
-1.1	-15.46	9.895e-35	1.278e-33	ZNF585A	FETAL-BIASED
-1.1	-15.11	1.028e-33	1.18e-32	ORC4	FETAL-BIASED
-1.1	-14.88	4.729e-33	5.088e-32	ZNF790-AS1	FETAL-BIASED
-1.1	-14.18	4.886e-31	4.169e-30	WDPCP	FETAL-BIASED
-1.1	-14.17	5.459e-31	4.63e-30	MDH1	FETAL-BIASED
-1.1	-14.1	8.638e-31	7.193e-30	ZNF587B	FETAL-BIASED
-1.1	-13.84	4.71e-30	3.638e-29	RPL41	FETAL-BIASED
-1.1	-13.63	2.018e-29	1.467e-28	MIR423	FETAL-BIASED
-1.1	-13.55	3.37e-29	2.406e-28	PDZRN3	FETAL-BIASED
-1.1	-11.81	3.965e-24	1.898e-23	SBDSP1	FETAL-BIASED
-1.1	-11.75	5.685e-24	2.686e-23	EPHA5-AS1	FETAL-BIASED
-1.1	-11.61	1.454e-23	6.647e-23	LOC728084	FETAL-BIASED
-1.1	-11.56	2.053e-23	9.293e-23	HMGA2	FETAL-BIASED
-1.1	-11.37	7.381e-23	3.219e-22	SCG5	FETAL-BIASED
-1.1	-11.34	9.132e-23	3.959e-22	ST8SIA4	FETAL-BIASED
-1.1	-10.33	6.818e-20	2.431e-19	FOLH1	FETAL-BIASED
-1.1	-9.91	1.034e-18	3.426e-18	LINC01829	FETAL-BIASED
-1.1	-9.83	1.723e-18	5.65e-18	LOC105375843	FETAL-BIASED
-1.1	-9.41	2.581e-17	7.862e-17	TLR3	FETAL-BIASED
-1.1	-9.16	1.237e-16	3.616e-16	SEMA3E	FETAL-BIASED
-1.1	-8.32	2.197e-14	5.651e-14	AGR2	FETAL-BIASED
-1.1	-8.28	2.927e-14	7.476e-14	LINC01170	FETAL-BIASED
-1.1	-7.33	7.949e-12	1.773e-11	LINC01797	FETAL-BIASED
-1.1	-6.38	1.48e-09	2.895e-09	SLC15A2	FETAL-BIASED
-1.1	-6.08	7.077e-09	1.334e-08	LINC00890	FETAL-BIASED
-1.1	-5.58	8.853e-08	1.565e-07	LOC101929095	FETAL-BIASED
-1.1	-5.16	6.534e-07	1.097e-06	KLRC4-KLRK1	FETAL-BIASED
-1.1	-4.82	3.099e-06	5.001e-06	OR6C68	FETAL-BIASED
-1.09	-21.01	4.462e-50	8.336e-48	GDAP1	FETAL-BIASED
-1.09	-20.32	2.996e-48	3.576e-46	CDC40	FETAL-BIASED
-1.09	-17.83	1.829e-41	5.8e-40	KBTBD3	FETAL-BIASED
-1.09	-17.71	4.038e-41	1.209e-39	LSG1	FETAL-BIASED
-1.09	-16.97	4.987e-39	1.094e-37	LOC150051	FETAL-BIASED
-1.09	-15.83	8.284e-36	1.226e-34	BLZF1	FETAL-BIASED
-1.09	-15.68	2.254e-35	3.149e-34	NIF3L1	FETAL-BIASED
-1.09	-14.93	3.368e-33	3.665e-32	PKD2L2	FETAL-BIASED
-1.09	-14.78	9.046e-33	9.371e-32	GPR19	FETAL-BIASED
-1.09	-14.65	2.155e-32	2.138e-31	MIMT1	FETAL-BIASED
-1.09	-14.38	1.273e-31	1.167e-30	HDAC8	FETAL-BIASED
-1.09	-14.35	1.65e-31	1.495e-30	RSPH4A	FETAL-BIASED
-1.09	-13.91	2.952e-30	2.327e-29	CARD8	FETAL-BIASED
-1.09	-13.32	1.625e-28	1.097e-27	PBX1	FETAL-BIASED
-1.09	-12.33	1.242e-25	6.642e-25	PCDH7	FETAL-BIASED
-1.09	-11.88	2.456e-24	1.194e-23	NHSL1	FETAL-BIASED
-1.09	-10.68	7.12e-21	2.712e-20	AGPAT1	FETAL-BIASED
-1.09	-10.49	2.442e-20	8.955e-20	RNU5D-1	FETAL-BIASED
-1.09	-10.41	3.936e-20	1.424e-19	RNF5	FETAL-BIASED
-1.09	-9.78	2.368e-18	7.698e-18	MIR4309	FETAL-BIASED
-1.09	-9.02	2.952e-16	8.455e-16	ALX1	FETAL-BIASED
-1.09	-8.43	1.113e-14	2.908e-14	SNORD144	FETAL-BIASED
-1.09	-6.49	8.193e-10	1.626e-09	FMO6P	FETAL-BIASED
-1.09	-5.97	1.253e-08	2.328e-08	GALNT1	FETAL-BIASED
-1.09	-5.81	2.773e-08	5.049e-08	MIR8068	FETAL-BIASED
-1.09	-5.56	9.636e-08	1.699e-07	PRICKLE2-AS1	FETAL-BIASED
-1.09	-5.49	1.399e-07	2.444e-07	NFIB	FETAL-BIASED
-1.09	-4.66	6.298e-06	9.977e-06	SNORD114-17	FETAL-BIASED
-1.09	-3.44	0.0007221	0.001004	MIR548AN	FETAL-BIASED
-1.09	-3.02	0.0029	0.003863	USP17L13	FETAL-BIASED
-1.08	-23.77	4.042e-57	6.083e-54	SMIM10L1	FETAL-BIASED
-1.08	-19.96	2.725e-47	2.627e-45	SPDL1	FETAL-BIASED
-1.08	-19.13	4.789e-45	2.962e-43	DEPDC1B	FETAL-BIASED
-1.08	-17.89	1.315e-41	4.34e-40	AASDHPPT	FETAL-BIASED
-1.08	-17.73	3.524e-41	1.063e-39	HIST3H2A	FETAL-BIASED
-1.08	-17.61	7.787e-41	2.225e-39	HIF3A	FETAL-BIASED
-1.08	-16.98	4.495e-39	9.932e-38	ZNF613	FETAL-BIASED
-1.08	-16.37	2.53e-37	4.491e-36	TIAM1	FETAL-BIASED
-1.08	-16.01	2.657e-36	4.19e-35	CCDC7	FETAL-BIASED
-1.08	-15.24	4.372e-34	5.218e-33	EFCAB2	FETAL-BIASED
-1.08	-15.03	1.747e-33	1.957e-32	COX16	FETAL-BIASED
-1.08	-14.84	6.084e-33	6.448e-32	CEP152	FETAL-BIASED
-1.08	-14.8	7.76e-33	8.098e-32	FZD2	FETAL-BIASED
-1.08	-14.48	6.678e-32	6.303e-31	PIN4	FETAL-BIASED
-1.08	-14.42	1.029e-31	9.547e-31	MAGOHB	FETAL-BIASED
-1.08	-14.36	1.503e-31	1.368e-30	RPPH1	FETAL-BIASED
-1.08	-13.95	2.389e-30	1.9e-29	CAPS2	FETAL-BIASED
-1.08	-13.92	2.743e-30	2.174e-29	GLIPR1L2	FETAL-BIASED
-1.08	-13.85	4.393e-30	3.403e-29	LARP7	FETAL-BIASED
-1.08	-13.85	4.491e-30	3.476e-29	ZGRF1	FETAL-BIASED
-1.08	-13.59	2.67e-29	1.921e-28	CHGB	FETAL-BIASED
-1.08	-13.28	2.071e-28	1.382e-27	RALYL	FETAL-BIASED
-1.08	-12.9	2.654e-27	1.61e-26	BMPR1B-AS1	FETAL-BIASED
-1.08	-12.31	1.395e-25	7.437e-25	MRPS18B	FETAL-BIASED
-1.08	-10.31	7.503e-20	2.668e-19	USP40	FETAL-BIASED
-1.08	-9.63	6.283e-18	1.986e-17	LIX1	FETAL-BIASED
-1.08	-8.96	4.437e-16	1.259e-15	PROX1-AS1	FETAL-BIASED
-1.08	-8.16	5.842e-14	1.468e-13	JAKMIP2-AS1	FETAL-BIASED
-1.08	-6.66	3.265e-10	6.621e-10	LOC101927787	FETAL-BIASED
-1.08	-5.98	1.18e-08	2.197e-08	CD163L1	FETAL-BIASED
-1.08	-5.81	2.772e-08	5.048e-08	LINC01014	FETAL-BIASED
-1.08	-5.15	6.908e-07	1.159e-06	LINC00358	FETAL-BIASED
-1.08	-5.01	1.286e-06	2.122e-06	LOC101926897	FETAL-BIASED
-1.07	-23.05	2.634e-55	2.099e-52	ZSCAN5A	FETAL-BIASED
-1.07	-17.59	8.688e-41	2.464e-39	SLU7	FETAL-BIASED
-1.07	-17.55	1.161e-40	3.242e-39	ZBTB41	FETAL-BIASED
-1.07	-17.44	2.282e-40	6.072e-39	PFN2	FETAL-BIASED
-1.07	-15.99	2.89e-36	4.538e-35	LOC101929431	FETAL-BIASED
-1.07	-15.9	5.311e-36	8.06e-35	UBE2T	FETAL-BIASED
-1.07	-15.07	1.285e-33	1.461e-32	SART3	FETAL-BIASED
-1.07	-15.05	1.499e-33	1.695e-32	SDCCAG8	FETAL-BIASED
-1.07	-14.92	3.615e-33	3.93e-32	ARL6	FETAL-BIASED
-1.07	-14.67	1.893e-32	1.897e-31	NEGR1	FETAL-BIASED
-1.07	-14.33	1.856e-31	1.668e-30	EIF3E	FETAL-BIASED
-1.07	-14.2	4.228e-31	3.636e-30	HSPA13	FETAL-BIASED
-1.07	-14.15	5.991e-31	5.057e-30	CDKAL1	FETAL-BIASED
-1.07	-14.02	1.429e-30	1.164e-29	LPXN	FETAL-BIASED
-1.07	-13.91	2.971e-30	2.341e-29	LOC100507006	FETAL-BIASED
-1.07	-13.82	5.645e-30	4.332e-29	CARD8-AS1	FETAL-BIASED
-1.07	-13.5	4.78e-29	3.361e-28	CDCA7	FETAL-BIASED
-1.07	-13.07	8.723e-28	5.51e-27	LOC283575	FETAL-BIASED
-1.07	-12.91	2.466e-27	1.502e-26	NDUFS4	FETAL-BIASED
-1.07	-12.89	2.775e-27	1.679e-26	ENOX2	FETAL-BIASED
-1.07	-10.89	1.742e-21	6.882e-21	SIAH3	FETAL-BIASED
-1.07	-10.77	3.699e-21	1.432e-20	LSAMP	FETAL-BIASED
-1.07	-10.08	3.492e-19	1.193e-18	SNTG1	FETAL-BIASED
-1.07	-8.57	4.767e-15	1.271e-14	ANGPT1	FETAL-BIASED
-1.07	-8.21	4.405e-14	1.115e-13	LINC00838	FETAL-BIASED
-1.07	-7.2	1.592e-11	3.488e-11	THRA1/BTR	FETAL-BIASED
-1.07	-6.8	1.502e-10	3.11e-10	IQCJ-SCHIP1	FETAL-BIASED
-1.07	-6.8	1.502e-10	3.11e-10	IQCJ	FETAL-BIASED
-1.07	-5.84	2.442e-08	4.464e-08	LINC01934	FETAL-BIASED
-1.07	-5.05	1.112e-06	1.842e-06	VEGFD	FETAL-BIASED
-1.07	-4.98	1.463e-06	2.406e-06	ABCB1	FETAL-BIASED
-1.07	-4.82	3.044e-06	4.915e-06	ALB	FETAL-BIASED
-1.07	-4.34	2.363e-05	3.617e-05	LOC101927062	FETAL-BIASED
-1.07	-3.89	0.0001441	0.0002102	LINC01360	FETAL-BIASED
-1.07	-3.76	0.0002317	0.0003333	MIR4528	FETAL-BIASED
-1.06	-19.45	6.674e-46	4.647e-44	MLLT10	FETAL-BIASED
-1.06	-18.1	3.338e-42	1.225e-40	ZBTB8B	FETAL-BIASED
-1.06	-17.65	5.814e-41	1.705e-39	ATXN7L3B	FETAL-BIASED
-1.06	-17.06	2.698e-39	6.179e-38	HIST3H2BB	FETAL-BIASED
-1.06	-16.58	6.115e-38	1.177e-36	TEX9	FETAL-BIASED
-1.06	-16.15	1.033e-36	1.71e-35	ERGIC2	FETAL-BIASED
-1.06	-16.03	2.3e-36	3.645e-35	HIST1H4A	FETAL-BIASED
-1.06	-15.76	1.395e-35	2e-34	POLR1A	FETAL-BIASED
-1.06	-15.75	1.484e-35	2.118e-34	PTCD3	FETAL-BIASED
-1.06	-15.53	6.172e-35	8.172e-34	ATP6AP1L	FETAL-BIASED
-1.06	-14.47	7.377e-32	6.936e-31	LOC102503427	FETAL-BIASED
-1.06	-14.18	5.023e-31	4.274e-30	LOC100505715	FETAL-BIASED
-1.06	-14.18	4.839e-31	4.131e-30	MIR3175	FETAL-BIASED
-1.06	-14.15	6.005e-31	5.066e-30	ZFP91	FETAL-BIASED
-1.06	-14.15	6.005e-31	5.066e-30	ZFP91-CNTF	FETAL-BIASED
-1.06	-13.24	2.797e-28	1.845e-27	HIST2H2AC	FETAL-BIASED
-1.06	-12.64	1.554e-26	8.875e-26	ZNF140	FETAL-BIASED
-1.06	-12.36	9.924e-26	5.349e-25	EBF1	FETAL-BIASED
-1.06	-11.95	1.478e-24	7.295e-24	HNRNPC	FETAL-BIASED
-1.06	-11.28	1.277e-22	5.475e-22	SEMA6D	FETAL-BIASED
-1.06	-10.59	1.258e-20	4.71e-20	LOC105370622	FETAL-BIASED
-1.06	-10.01	5.5e-19	1.855e-18	LOC90768	FETAL-BIASED
-1.06	-8.87	7.751e-16	2.171e-15	LINC01960	FETAL-BIASED
-1.06	-8.72	1.901e-15	5.187e-15	IFIT2	FETAL-BIASED
-1.06	-7.83	4.165e-13	9.997e-13	MIR3681HG	FETAL-BIASED
-1.06	-7.53	2.444e-12	5.613e-12	METTL21EP	FETAL-BIASED
-1.06	-6.49	8.182e-10	1.624e-09	MIR190A	FETAL-BIASED
-1.06	-6.49	8.342e-10	1.655e-09	LINC01391	FETAL-BIASED
-1.06	-5.1	8.682e-07	1.447e-06	MIR4451	FETAL-BIASED
-1.06	-4.7	5.198e-06	8.28e-06	MIR103B1	FETAL-BIASED
-1.06	-4.59	8.461e-06	1.331e-05	LINC01689	FETAL-BIASED
-1.06	-3.97	0.000104	0.000153	MIR4300	FETAL-BIASED
-1.06	-3.56	0.00047	0.0006616	MIR105-2	FETAL-BIASED
-1.06	-2.99	0.003204	0.004252	MIR6077	FETAL-BIASED
-1.06	-2.97	0.003367	0.004463	TBC1D3L	FETAL-BIASED
-1.05	-18.89	2.238e-44	1.189e-42	TAF7	FETAL-BIASED
-1.05	-18.64	1.1e-43	5.155e-42	MNS1	FETAL-BIASED
-1.05	-18.55	1.944e-43	8.811e-42	PROX1	FETAL-BIASED
-1.05	-17.95	8.457e-42	2.893e-40	FKBP3	FETAL-BIASED
-1.05	-17.79	2.374e-41	7.384e-40	VCPKMT	FETAL-BIASED
-1.05	-17.37	3.65e-40	9.425e-39	ZSCAN16-AS1	FETAL-BIASED
-1.05	-17.35	4.103e-40	1.048e-38	DHX36	FETAL-BIASED
-1.05	-17.24	8.313e-40	2.029e-38	LOC389705	FETAL-BIASED
-1.05	-16.93	6.216e-39	1.345e-37	UFL1	FETAL-BIASED
-1.05	-16.88	8.769e-39	1.866e-37	RSL24D1	FETAL-BIASED
-1.05	-16.8	1.519e-38	3.135e-37	SETDB1	FETAL-BIASED
-1.05	-16.61	5.009e-38	9.727e-37	LOC101928068	FETAL-BIASED
-1.05	-16.45	1.489e-37	2.732e-36	TSPAN6	FETAL-BIASED
-1.05	-16.18	8.594e-37	1.441e-35	TBP	FETAL-BIASED
-1.05	-15.76	1.342e-35	1.931e-34	HIST1H2AL	FETAL-BIASED
-1.05	-15.27	3.581e-34	4.325e-33	CDK1	FETAL-BIASED
-1.05	-14.8	7.864e-33	8.197e-32	TTC26	FETAL-BIASED
-1.05	-14.38	1.347e-31	1.232e-30	FKBP14	FETAL-BIASED
-1.05	-14.1	8.675e-31	7.222e-30	C11orf74	FETAL-BIASED
-1.05	-14.01	1.554e-30	1.259e-29	ZNF112	FETAL-BIASED
-1.05	-13.27	2.207e-28	1.469e-27	FMC1	FETAL-BIASED
-1.05	-12.88	2.996e-27	1.808e-26	LUC7L2	FETAL-BIASED
-1.05	-12.38	8.669e-26	4.694e-25	SCG3	FETAL-BIASED
-1.05	-12.3	1.512e-25	8.034e-25	ADGRL3	FETAL-BIASED
-1.05	-11.95	1.516e-24	7.474e-24	MRPL13	FETAL-BIASED
-1.05	-11.95	1.572e-24	7.743e-24	MTBP	FETAL-BIASED
-1.05	-11.82	3.659e-24	1.756e-23	EFNB3	FETAL-BIASED
-1.05	-11.05	5.928e-22	2.418e-21	MAGED1	FETAL-BIASED
-1.05	-10.83	2.569e-21	1.004e-20	PDGFRA	FETAL-BIASED
-1.05	-10.41	4.129e-20	1.491e-19	DPP10-AS1	FETAL-BIASED
-1.05	-9.34	4.015e-17	1.209e-16	SCRG1	FETAL-BIASED
-1.05	-8.8	1.187e-15	3.282e-15	ZNF177	FETAL-BIASED
-1.05	-8.81	1.091e-15	3.026e-15	MEIS1-AS2	FETAL-BIASED
-1.05	-8.67	2.69e-15	7.27e-15	SP8	FETAL-BIASED
-1.05	-8.47	9.024e-15	2.367e-14	LOC101928453	FETAL-BIASED
-1.05	-6.86	1.101e-10	2.297e-10	KLF5	FETAL-BIASED
-1.05	-6.85	1.192e-10	2.481e-10	SNORA103	FETAL-BIASED
-1.05	-6.6	4.474e-10	9.004e-10	C1orf162	FETAL-BIASED
-1.05	-5.86	2.205e-08	4.04e-08	MIR30C2	FETAL-BIASED
-1.05	-5.2	5.46e-07	9.208e-07	LOC101927901	FETAL-BIASED
-1.05	-5.07	1.013e-06	1.682e-06	MIR490	FETAL-BIASED
-1.05	-4.85	2.71e-06	4.388e-06	MIR580	FETAL-BIASED
-1.05	-4.53	1.084e-05	1.694e-05	OR13C2	FETAL-BIASED
-1.05	-4.17	4.727e-05	7.107e-05	MIR383	FETAL-BIASED
-1.05	-2.69	0.007914	0.01007	MIR3180-2	FETAL-BIASED
-1.05	-2.54	0.01202	0.01509	TBC1D3G	FETAL-BIASED
-1.04	-18	6.28e-42	2.207e-40	SMC2	FETAL-BIASED
-1.04	-17.8	2.336e-41	7.272e-40	PCNX4	FETAL-BIASED
-1.04	-17.77	2.691e-41	8.312e-40	EMC2	FETAL-BIASED
-1.04	-17.06	2.754e-39	6.285e-38	TRIQK	FETAL-BIASED
-1.04	-17.05	2.912e-39	6.607e-38	HEXB	FETAL-BIASED
-1.04	-16.7	2.849e-38	5.7e-37	IMMP1L	FETAL-BIASED
-1.04	-16.69	3.082e-38	6.144e-37	TTC32	FETAL-BIASED
-1.04	-16.59	5.931e-38	1.145e-36	ELP4	FETAL-BIASED
-1.04	-16.43	1.614e-37	2.945e-36	STAM	FETAL-BIASED
-1.04	-16.19	7.855e-37	1.318e-35	RBBP5	FETAL-BIASED
-1.04	-16.16	9.776e-37	1.624e-35	LOC101929231	FETAL-BIASED
-1.04	-15.96	3.677e-36	5.696e-35	TMEM209	FETAL-BIASED
-1.04	-15.96	3.674e-36	5.694e-35	WBP11	FETAL-BIASED
-1.04	-15.95	3.815e-36	5.885e-35	C12orf60	FETAL-BIASED
-1.04	-15.8	1.029e-35	1.502e-34	CCND2-AS1	FETAL-BIASED
-1.04	-15.42	1.298e-34	1.648e-33	OSTC	FETAL-BIASED
-1.04	-15.38	1.638e-34	2.056e-33	CCNH	FETAL-BIASED
-1.04	-15.21	5.155e-34	6.122e-33	MBD5	FETAL-BIASED
-1.04	-14.62	2.614e-32	2.571e-31	C7orf55-LUC7L2	FETAL-BIASED
-1.04	-14.24	3.377e-31	2.943e-30	MIR4500HG	FETAL-BIASED
-1.04	-13.77	7.534e-30	5.704e-29	FBXO8	FETAL-BIASED
-1.04	-13.52	4.214e-29	2.98e-28	C10orf107	FETAL-BIASED
-1.04	-13.55	3.349e-29	2.391e-28	POT1-AS1	FETAL-BIASED
-1.04	-12.91	2.49e-27	1.516e-26	NPR3	FETAL-BIASED
-1.04	-12.82	4.573e-27	2.715e-26	RNY5	FETAL-BIASED
-1.04	-11.81	3.801e-24	1.822e-23	ABCB7	FETAL-BIASED
-1.04	-11.8	4.13e-24	1.974e-23	MAP2K6	FETAL-BIASED
-1.04	-10.92	1.438e-21	5.712e-21	SBDS	FETAL-BIASED
-1.04	-10.8	3.095e-21	1.205e-20	TRO	FETAL-BIASED
-1.04	-9.01	3.251e-16	9.287e-16	MIR618	FETAL-BIASED
-1.04	-8.68	2.42e-15	6.555e-15	JPX	FETAL-BIASED
-1.04	-8.6	4.045e-15	1.083e-14	LINC00240	FETAL-BIASED
-1.04	-6.69	2.815e-10	5.731e-10	F2RL2	FETAL-BIASED
-1.04	-6.03	9.119e-09	1.707e-08	CDH19	FETAL-BIASED
-1.04	-5.64	6.504e-08	1.16e-07	FMO2	FETAL-BIASED
-1.04	-5.55	1.046e-07	1.842e-07	DUSP27	FETAL-BIASED
-1.04	-5.53	1.142e-07	2.006e-07	SAMD9L	FETAL-BIASED
-1.04	-5.35	2.74e-07	4.7e-07	KIAA1109	FETAL-BIASED
-1.04	-4.54	1.02e-05	1.597e-05	RAB40A	FETAL-BIASED
-1.04	-3.93	0.0001221	0.0001788	LOC101929473	FETAL-BIASED
-1.04	-2.94	0.003694	0.004834	RHOU	FETAL-BIASED
-1.04	-2.94	0.003694	0.004834	FAM138A	FETAL-BIASED
-1.04	-2.94	0.003694	0.004834	OR4F29	FETAL-BIASED
-1.04	-2.94	0.003694	0.004834	PRAMEF33P	FETAL-BIASED
-1.04	-2.94	0.003694	0.004834	PRAMEF13	FETAL-BIASED
-1.04	-2.94	0.003694	0.004834	PRAMEF8	FETAL-BIASED
-1.04	-2.94	0.003694	0.004834	PRAMEF15	FETAL-BIASED
-1.04	-2.94	0.003694	0.004834	PRAMEF14	FETAL-BIASED
-1.04	-2.94	0.003694	0.004834	PRAMEF19	FETAL-BIASED
-1.04	-2.94	0.003694	0.004834	RNU1-3	FETAL-BIASED
-1.04	-2.94	0.003694	0.004834	RNU1-4	FETAL-BIASED
-1.04	-2.94	0.003694	0.004834	PDZK1P1	FETAL-BIASED
-1.04	-2.94	0.003694	0.004834	LOC100132057	FETAL-BIASED
-1.04	-2.94	0.003694	0.004834	RNVU1-3	FETAL-BIASED
-1.04	-2.94	0.003694	0.004834	PPIAL4F	FETAL-BIASED
-1.04	-2.94	0.003694	0.004834	HIST2H4A	FETAL-BIASED
-1.04	-2.94	0.003694	0.004834	HIST2H3C	FETAL-BIASED
-1.04	-2.94	0.003694	0.004834	HIST2H3A	FETAL-BIASED
-1.04	-2.94	0.003694	0.004834	HIST2H4B	FETAL-BIASED
-1.04	-2.94	0.003694	0.004834	RNA5S1	FETAL-BIASED
-1.04	-2.94	0.003694	0.004834	RNA5S3	FETAL-BIASED
-1.04	-2.94	0.003694	0.004834	RNA5S4	FETAL-BIASED
-1.04	-2.94	0.003694	0.004834	RNA5S5	FETAL-BIASED
-1.04	-2.94	0.003694	0.004834	RNA5S7	FETAL-BIASED
-1.04	-2.94	0.003694	0.004834	RNA5S10	FETAL-BIASED
-1.04	-2.94	0.003694	0.004834	RNA5S16	FETAL-BIASED
-1.04	-2.94	0.003694	0.004834	DUSP5P1	FETAL-BIASED
-1.04	-2.94	0.003694	0.004834	RGPD6	FETAL-BIASED
-1.04	-2.94	0.003694	0.004834	TISP43	FETAL-BIASED
-1.04	-2.94	0.003694	0.004834	GPAT2	FETAL-BIASED
-1.04	-2.94	0.003694	0.004834	LOC100506076	FETAL-BIASED
-1.04	-2.94	0.003694	0.004834	RGPD5	FETAL-BIASED
-1.04	-2.94	0.003694	0.004834	LIMS3	FETAL-BIASED
-1.04	-2.94	0.003694	0.004834	LIMS3-LOC440895	FETAL-BIASED
-1.04	-2.94	0.003694	0.004834	MIR4436B1	FETAL-BIASED
-1.04	-2.94	0.003694	0.004834	MIR4436B2	FETAL-BIASED
-1.04	-2.94	0.003694	0.004834	LIMS4	FETAL-BIASED
-1.04	-2.94	0.003694	0.004834	LOC646743	FETAL-BIASED
-1.04	-2.94	0.003694	0.004834	USP17L17	FETAL-BIASED
-1.04	-2.94	0.003694	0.004834	USP17L27	FETAL-BIASED
-1.04	-2.94	0.003694	0.004834	USP17L28	FETAL-BIASED
-1.04	-2.94	0.003694	0.004834	GUSBP3	FETAL-BIASED
-1.04	-2.94	0.003694	0.004834	SERF1B	FETAL-BIASED
-1.04	-2.94	0.003694	0.004834	GTF2H2B	FETAL-BIASED
-1.04	-2.94	0.003694	0.004834	SERF1A	FETAL-BIASED
-1.04	-2.94	0.003694	0.004834	GTF2H2	FETAL-BIASED
-1.04	-2.94	0.003694	0.004834	LOC100132062	FETAL-BIASED
-1.04	-2.94	0.003694	0.004834	OR4F3	FETAL-BIASED
-1.04	-2.94	0.003694	0.004834	C4A	FETAL-BIASED
-1.04	-2.94	0.003694	0.004834	C4B	FETAL-BIASED
-1.04	-2.94	0.003694	0.004834	GTF2IP1	FETAL-BIASED
-1.04	-2.94	0.003694	0.004834	SPDYE6	FETAL-BIASED
-1.04	-2.94	0.003694	0.004834	OR2A20P	FETAL-BIASED
-1.04	-2.94	0.003694	0.004834	REXO1L2P	FETAL-BIASED
-1.04	-2.94	0.003694	0.004834	CBWD6	FETAL-BIASED
-1.04	-2.94	0.003694	0.004834	FGF7P3	FETAL-BIASED
-1.04	-2.94	0.003694	0.004834	LOC554249	FETAL-BIASED
-1.04	-2.94	0.003694	0.004834	LOC105379252	FETAL-BIASED
-1.04	-2.94	0.003694	0.004834	LOC105376064	FETAL-BIASED
-1.04	-2.94	0.003694	0.004834	LOC102724238	FETAL-BIASED
-1.04	-2.94	0.003694	0.004834	FGF7P6	FETAL-BIASED
-1.04	-2.94	0.003694	0.004834	FAM74A4	FETAL-BIASED
-1.04	-2.94	0.003694	0.004834	SPATA31A7	FETAL-BIASED
-1.04	-2.94	0.003694	0.004834	LOC101928381	FETAL-BIASED
-1.04	-2.94	0.003694	0.004834	FOXD4L4	FETAL-BIASED
-1.04	-2.94	0.003694	0.004834	SPATA31D4	FETAL-BIASED
-1.04	-2.94	0.003694	0.004834	SPATA31D3	FETAL-BIASED
-1.04	-2.94	0.003694	0.004834	CT47A12	FETAL-BIASED
-1.04	-2.94	0.003694	0.004834	CT45A5	FETAL-BIASED
-1.04	-2.94	0.003694	0.004834	SPANXA2-OT1	FETAL-BIASED
-1.04	-2.94	0.003694	0.004834	SPRY3	FETAL-BIASED
-1.04	-2.94	0.003694	0.004834	PLCXD1	FETAL-BIASED
-1.04	-2.94	0.003694	0.004834	GAGE13	FETAL-BIASED
-1.04	-2.94	0.003694	0.004834	GAGE12B	FETAL-BIASED
-1.04	-2.94	0.003694	0.004834	GAGE2D	FETAL-BIASED
-1.04	-2.94	0.003694	0.004834	GAGE2C	FETAL-BIASED
-1.04	-2.94	0.003694	0.004834	GAGE12D	FETAL-BIASED
-1.04	-2.94	0.003694	0.004834	GAGE12F	FETAL-BIASED
-1.04	-2.94	0.003694	0.004834	GAGE12H	FETAL-BIASED
-1.04	-2.94	0.003694	0.004834	GAGE1	FETAL-BIASED
-1.04	-2.94	0.003694	0.004834	MAGED4B	FETAL-BIASED
-1.04	-2.94	0.003694	0.004834	SNORA11E	FETAL-BIASED
-1.04	-2.94	0.003694	0.004834	MAGED4	FETAL-BIASED
-1.04	-2.94	0.003694	0.004834	SNORA11D	FETAL-BIASED
-1.04	-2.94	0.003694	0.004834	XAGE2	FETAL-BIASED
-1.04	-2.94	0.003694	0.004834	XAGE1B	FETAL-BIASED
-1.04	-2.94	0.003694	0.004834	XAGE1E	FETAL-BIASED
-1.04	-2.94	0.003694	0.004834	SSX2	FETAL-BIASED
-1.04	-2.94	0.003694	0.004834	SSX2B	FETAL-BIASED
-1.04	-2.94	0.003694	0.004834	FAM156B	FETAL-BIASED
-1.04	-2.94	0.003694	0.004834	LINC00891	FETAL-BIASED
-1.04	-2.94	0.003694	0.004834	CXorf49B	FETAL-BIASED
-1.04	-2.94	0.003694	0.004834	LOC100132741	FETAL-BIASED
-1.04	-2.94	0.003694	0.004834	FAM236B	FETAL-BIASED
-1.04	-2.94	0.003694	0.004834	FAM226A	FETAL-BIASED
-1.04	-2.94	0.003694	0.004834	TCP11X2	FETAL-BIASED
-1.04	-2.94	0.003694	0.004834	CT47A11	FETAL-BIASED
-1.04	-2.94	0.003694	0.004834	CT47A9	FETAL-BIASED
-1.04	-2.94	0.003694	0.004834	CT47A8	FETAL-BIASED
-1.04	-2.94	0.003694	0.004834	CT47A7	FETAL-BIASED
-1.04	-2.94	0.003694	0.004834	CT47A5	FETAL-BIASED
-1.04	-2.94	0.003694	0.004834	CT47A4	FETAL-BIASED
-1.04	-2.94	0.003694	0.004834	CT47A3	FETAL-BIASED
-1.04	-2.94	0.003694	0.004834	CT47A2	FETAL-BIASED
-1.04	-2.94	0.003694	0.004834	CXorf51B	FETAL-BIASED
-1.04	-2.94	0.003694	0.004834	CXorf51A	FETAL-BIASED
-1.04	-2.94	0.003694	0.004834	MAGEA2	FETAL-BIASED
-1.04	-2.94	0.003694	0.004834	PNMA6A	FETAL-BIASED
-1.04	-2.94	0.003694	0.004834	CTAG1A	FETAL-BIASED
-1.04	-2.94	0.003694	0.004834	CTAG1B	FETAL-BIASED
-1.04	-2.94	0.003694	0.004834	VAMP7	FETAL-BIASED
-1.04	-2.94	0.003694	0.004834	IL9R	FETAL-BIASED
-1.04	-2.94	0.003694	0.004834	XGY2	FETAL-BIASED
-1.04	-2.94	0.003694	0.004834	HSFY1	FETAL-BIASED
-1.04	-2.94	0.003694	0.004834	DAZ1	FETAL-BIASED
-1.04	-2.94	0.003694	0.004834	DAZ2	FETAL-BIASED
-1.04	-2.94	0.003694	0.004834	TTTY1B	FETAL-BIASED
-1.04	-2.94	0.003694	0.004834	TTTY7	FETAL-BIASED
-1.04	-2.94	0.003694	0.004834	TSPY3	FETAL-BIASED
-1.04	-2.94	0.003694	0.004834	TTTY7B	FETAL-BIASED
-1.04	-2.94	0.003694	0.004834	TTTY1	FETAL-BIASED
-1.04	-2.94	0.003694	0.004834	VCY	FETAL-BIASED
-1.04	-2.94	0.003694	0.004834	VCY1B	FETAL-BIASED
-1.04	-2.94	0.003694	0.004834	FAM41AY1	FETAL-BIASED
-1.04	-2.94	0.003694	0.004834	XKRY	FETAL-BIASED
-1.04	-2.94	0.003694	0.004834	XKRY2	FETAL-BIASED
-1.04	-2.94	0.003694	0.004834	FAM224A	FETAL-BIASED
-1.04	-2.94	0.003694	0.004834	FAM41AY2	FETAL-BIASED
-1.04	-2.94	0.003694	0.004834	RBMY1A1	FETAL-BIASED
-1.04	-2.94	0.003694	0.004834	RBMY1D	FETAL-BIASED
-1.04	-2.94	0.003694	0.004834	RBMY1E	FETAL-BIASED
-1.04	-2.94	0.003694	0.004834	TTTY6B	FETAL-BIASED
-1.04	-2.94	0.003694	0.004834	LOC101929148	FETAL-BIASED
-1.04	-2.94	0.003694	0.004834	TTTY6	FETAL-BIASED
-1.04	-2.94	0.003694	0.004834	TTTY17A	FETAL-BIASED
-1.04	-2.94	0.003694	0.004834	TTTY4	FETAL-BIASED
-1.04	-2.94	0.003694	0.004834	BPY2	FETAL-BIASED
-1.04	-2.94	0.003694	0.004834	CDY1B	FETAL-BIASED
-1.04	-2.94	0.003694	0.004834	GOLGA2P2Y	FETAL-BIASED
-1.04	-2.94	0.003694	0.004834	BPY2B	FETAL-BIASED
-1.04	-2.94	0.003694	0.004834	DAZ3	FETAL-BIASED
-1.04	-2.94	0.003694	0.004834	BPY2C	FETAL-BIASED
-1.04	-2.94	0.003694	0.004834	TTTY4C	FETAL-BIASED
-1.04	-2.94	0.003694	0.004834	GOLGA2P3Y	FETAL-BIASED
-1.04	-2.94	0.003694	0.004834	CSPG4P1Y	FETAL-BIASED
-1.04	-2.94	0.003694	0.004834	CDY1	FETAL-BIASED
-1.04	-2.94	0.003694	0.004834	AGAP9	FETAL-BIASED
-1.04	-2.94	0.003694	0.004834	PARGP1	FETAL-BIASED
-1.04	-2.94	0.003694	0.004834	ANXA8L1	FETAL-BIASED
-1.04	-2.94	0.003694	0.004834	FAM25BP	FETAL-BIASED
-1.04	-2.94	0.003694	0.004834	FAM25G	FETAL-BIASED
-1.04	-2.94	0.003694	0.004834	ANXA8	FETAL-BIASED
-1.04	-2.94	0.003694	0.004834	TRIM49D1	FETAL-BIASED
-1.04	-2.94	0.003694	0.004834	PRR20C	FETAL-BIASED
-1.04	-2.94	0.003694	0.004834	PRR20E	FETAL-BIASED
-1.04	-2.94	0.003694	0.004834	LOC101927079	FETAL-BIASED
-1.04	-2.94	0.003694	0.004834	GOLGA6L1	FETAL-BIASED
-1.04	-2.94	0.003694	0.004834	GOLGA6B	FETAL-BIASED
-1.04	-2.94	0.003694	0.004834	GOLGA6A	FETAL-BIASED
-1.04	-2.94	0.003694	0.004834	ADAMTS7P1	FETAL-BIASED
-1.04	-2.94	0.003694	0.004834	GOLGA6L9	FETAL-BIASED
-1.04	-2.94	0.003694	0.004834	GOLGA6L10	FETAL-BIASED
-1.04	-2.94	0.003694	0.004834	NPIPA3	FETAL-BIASED
-1.04	-2.94	0.003694	0.004834	NPIPB5	FETAL-BIASED
-1.04	-2.94	0.003694	0.004834	PLA2G10	FETAL-BIASED
-1.04	-2.94	0.003694	0.004834	MIR3670-1	FETAL-BIASED
-1.04	-2.94	0.003694	0.004834	MIR3179-2	FETAL-BIASED
-1.04	-2.94	0.003694	0.004834	MIR3670-2	FETAL-BIASED
-1.04	-2.94	0.003694	0.004834	MIR6770-2	FETAL-BIASED
-1.04	-2.94	0.003694	0.004834	NPIPA7	FETAL-BIASED
-1.04	-2.94	0.003694	0.004834	NPIPA8	FETAL-BIASED
-1.04	-2.94	0.003694	0.004834	MIR6770-3	FETAL-BIASED
-1.04	-2.94	0.003694	0.004834	MIR3670-3	FETAL-BIASED
-1.04	-2.94	0.003694	0.004834	MIR3179-3	FETAL-BIASED
-1.04	-2.94	0.003694	0.004834	LOC100190986	FETAL-BIASED
-1.04	-2.94	0.003694	0.004834	SULT1A4	FETAL-BIASED
-1.04	-2.94	0.003694	0.004834	SULT1A3	FETAL-BIASED
-1.04	-2.94	0.003694	0.004834	TP53TG3C	FETAL-BIASED
-1.04	-2.94	0.003694	0.004834	TP53TG3B	FETAL-BIASED
-1.04	-2.94	0.003694	0.004834	NSF	FETAL-BIASED
-1.04	-2.94	0.003694	0.004834	LOC79999	FETAL-BIASED
-1.04	-2.94	0.003694	0.004834	LOC388436	FETAL-BIASED
-1.04	-2.94	0.003694	0.004834	NSFP1	FETAL-BIASED
-1.04	-2.94	0.003694	0.004834	FAM138F	FETAL-BIASED
-1.04	-2.94	0.003694	0.004834	ZNF826P	FETAL-BIASED
-1.04	-2.94	0.003694	0.004834	MIR1270	FETAL-BIASED
-1.04	-2.94	0.003694	0.004834	SNAR-A8	FETAL-BIASED
-1.04	-2.94	0.003694	0.004834	SNAR-A11	FETAL-BIASED
-1.04	-2.94	0.003694	0.004834	LOC101927859	FETAL-BIASED
-1.04	-2.94	0.003694	0.004834	UBE2L3	FETAL-BIASED
-1.04	-2.94	0.003694	0.004834	DDTL	FETAL-BIASED
-1.04	-2.93	0.003798	0.004966	RBMY1J	FETAL-BIASED
-1.03	-22.38	1.324e-53	7.474e-51	ZNF542P	FETAL-BIASED
-1.03	-19.83	6.156e-47	5.45e-45	CDC7	FETAL-BIASED
-1.03	-18.11	3.107e-42	1.147e-40	YARS2	FETAL-BIASED
-1.03	-18.06	4.408e-42	1.586e-40	AIMP1	FETAL-BIASED
-1.03	-17.9	1.192e-41	3.953e-40	MEIS1-AS3	FETAL-BIASED
-1.03	-16.83	1.218e-38	2.547e-37	MRPS30	FETAL-BIASED
-1.03	-16.74	2.215e-38	4.482e-37	LINC01572	FETAL-BIASED
-1.03	-16.67	3.389e-38	6.73e-37	RND3	FETAL-BIASED
-1.03	-16.52	9.196e-38	1.732e-36	GTF2B	FETAL-BIASED
-1.03	-16.47	1.245e-37	2.309e-36	BRCAT54	FETAL-BIASED
-1.03	-15.82	9.034e-36	1.33e-34	ZNF681	FETAL-BIASED
-1.03	-15.2	5.647e-34	6.68e-33	LOC101929147	FETAL-BIASED
-1.03	-14.57	3.727e-32	3.604e-31	LOC100506844	FETAL-BIASED
-1.03	-13.81	6.081e-30	4.651e-29	EXOSC8	FETAL-BIASED
-1.03	-13.37	1.12e-28	7.653e-28	PARP2	FETAL-BIASED
-1.03	-13.34	1.43e-28	9.698e-28	POT1	FETAL-BIASED
-1.03	-12.84	4.006e-27	2.388e-26	NSRP1	FETAL-BIASED
-1.03	-12.13	4.677e-25	2.396e-24	ZNF331	FETAL-BIASED
-1.03	-11.92	1.823e-24	8.935e-24	LINC00437	FETAL-BIASED
-1.03	-10.68	6.977e-21	2.659e-20	LOC105373300	FETAL-BIASED
-1.03	-8.04	1.209e-13	2.989e-13	PGAM1P5	FETAL-BIASED
-1.03	-7.32	8.309e-12	1.851e-11	SNORD71	FETAL-BIASED
-1.03	-5.7	4.839e-08	8.689e-08	IDO1	FETAL-BIASED
-1.03	-4.89	2.215e-06	3.602e-06	CPLX4	FETAL-BIASED
-1.03	-2.4	0.01731	0.02144	USP17L12	FETAL-BIASED
-1.02	-19.45	6.715e-46	4.653e-44	RNF150	FETAL-BIASED
-1.02	-18.25	1.258e-42	4.931e-41	TOMM70	FETAL-BIASED
-1.02	-17.54	1.178e-40	3.281e-39	RPL22L1	FETAL-BIASED
-1.02	-16.7	2.824e-38	5.654e-37	CTSO	FETAL-BIASED
-1.02	-16.29	4.212e-37	7.296e-36	ABHD10	FETAL-BIASED
-1.02	-15.73	1.692e-35	2.399e-34	TGFB2-AS1	FETAL-BIASED
-1.02	-15.71	1.843e-35	2.602e-34	MMADHC	FETAL-BIASED
-1.02	-15.65	2.776e-35	3.841e-34	C12orf4	FETAL-BIASED
-1.02	-15.29	3.044e-34	3.703e-33	CEP126	FETAL-BIASED
-1.02	-15.16	7.382e-34	8.619e-33	ENOX1	FETAL-BIASED
-1.02	-15.16	7.072e-34	8.287e-33	WARS2	FETAL-BIASED
-1.02	-15.13	8.65e-34	1.001e-32	HMMR	FETAL-BIASED
-1.02	-15.11	9.911e-34	1.14e-32	RAB30	FETAL-BIASED
-1.02	-14.81	7.53e-33	7.863e-32	LAPTM4A	FETAL-BIASED
-1.02	-14.42	1.017e-31	9.439e-31	RPL32P3	FETAL-BIASED
-1.02	-14.3	2.231e-31	1.992e-30	FAM13C	FETAL-BIASED
-1.02	-14.19	4.559e-31	3.903e-30	ZNF578	FETAL-BIASED
-1.02	-14.17	5.203e-31	4.418e-30	TCEAL9	FETAL-BIASED
-1.02	-13.85	4.535e-30	3.509e-29	BICC1	FETAL-BIASED
-1.02	-13.72	1.083e-29	8.054e-29	WDR63	FETAL-BIASED
-1.02	-13.62	2.08e-29	1.511e-28	NDUFA9	FETAL-BIASED
-1.02	-13.25	2.563e-28	1.698e-27	FUZ	FETAL-BIASED
-1.02	-13.22	3.175e-28	2.086e-27	LOC105377348	FETAL-BIASED
-1.02	-13.01	1.226e-27	7.647e-27	HIST2H2BE	FETAL-BIASED
-1.02	-12.92	2.265e-27	1.385e-26	LOC101927768	FETAL-BIASED
-1.02	-11.38	6.965e-23	3.045e-22	TBC1D8B	FETAL-BIASED
-1.02	-11.33	9.621e-23	4.163e-22	ANKRD45	FETAL-BIASED
-1.02	-10.43	3.619e-20	1.312e-19	PRSS35	FETAL-BIASED
-1.02	-10.04	4.392e-19	1.491e-18	HIST2H2BA	FETAL-BIASED
-1.02	-9.83	1.747e-18	5.728e-18	NTM	FETAL-BIASED
-1.02	-9.79	2.255e-18	7.341e-18	METTL7A	FETAL-BIASED
-1.02	-9.34	4.076e-17	1.227e-16	LOC101927377	FETAL-BIASED
-1.02	-6.76	1.879e-10	3.866e-10	LOC102724849	FETAL-BIASED
-1.02	-6.81	1.436e-10	2.975e-10	MIR10A	FETAL-BIASED
-1.02	-6.44	1.065e-09	2.101e-09	MIR4799	FETAL-BIASED
-1.02	-6.35	1.713e-09	3.335e-09	DISC2	FETAL-BIASED
-1.02	-5.88	1.948e-08	3.58e-08	ADAMTS9-AS1	FETAL-BIASED
-1.02	-5.11	8.213e-07	1.371e-06	MIR3122	FETAL-BIASED
-1.02	-4.6	7.845e-06	1.237e-05	SNORD113-6	FETAL-BIASED
-1.02	-2.89	0.004308	0.005605	LINC01660	FETAL-BIASED
-1.01	-19.8	7.578e-47	6.558e-45	COX20	FETAL-BIASED
-1.01	-18.95	1.499e-44	8.32e-43	RTKN2	FETAL-BIASED
-1.01	-17.8	2.215e-41	6.912e-40	CEP97	FETAL-BIASED
-1.01	-17.68	4.94e-41	1.472e-39	CLHC1	FETAL-BIASED
-1.01	-17.28	6.323e-40	1.568e-38	FPGT-TNNI3K	FETAL-BIASED
-1.01	-17.28	6.323e-40	1.568e-38	FPGT	FETAL-BIASED
-1.01	-17.23	9.075e-40	2.189e-38	LRRIQ3	FETAL-BIASED
-1.01	-16.82	1.291e-38	2.694e-37	LOC644554	FETAL-BIASED
-1.01	-16.56	6.951e-38	1.33e-36	DYNC2H1	FETAL-BIASED
-1.01	-16.5	1.028e-37	1.922e-36	NDUFB4	FETAL-BIASED
-1.01	-16.47	1.298e-37	2.399e-36	ZNF345	FETAL-BIASED
-1.01	-16.22	6.474e-37	1.097e-35	STAM-AS1	FETAL-BIASED
-1.01	-16.05	2.019e-36	3.225e-35	SNORD45C	FETAL-BIASED
-1.01	-15.91	5.21e-36	7.929e-35	TGFB2	FETAL-BIASED
-1.01	-15.31	2.705e-34	3.322e-33	MYC	FETAL-BIASED
-1.01	-14.87	5.122e-33	5.491e-32	OTUD6B-AS1	FETAL-BIASED
-1.01	-14.86	5.32e-33	5.687e-32	OTUD6B	FETAL-BIASED
-1.01	-14.79	8.334e-33	8.67e-32	ZBED3-AS1	FETAL-BIASED
-1.01	-14.49	6.308e-32	5.971e-31	C4orf22	FETAL-BIASED
-1.01	-14.29	2.332e-31	2.074e-30	ZNF726	FETAL-BIASED
-1.01	-14.11	7.713e-31	6.447e-30	PBDC1	FETAL-BIASED
-1.01	-14.06	1.117e-30	9.181e-30	GATB	FETAL-BIASED
-1.01	-13.97	1.978e-30	1.587e-29	HNRNPH2	FETAL-BIASED
-1.01	-13.77	7.685e-30	5.813e-29	RPS26	FETAL-BIASED
-1.01	-13.56	3.177e-29	2.272e-28	AKAP3	FETAL-BIASED
-1.01	-13.51	4.535e-29	3.195e-28	ARMC1	FETAL-BIASED
-1.01	-13.16	4.732e-28	3.061e-27	LOC643770	FETAL-BIASED
-1.01	-12.86	3.41e-27	2.043e-26	SCN9A	FETAL-BIASED
-1.01	-11.31	1.053e-22	4.54e-22	DDX60L	FETAL-BIASED
-1.01	-11.15	3.164e-22	1.318e-21	HAS2-AS1	FETAL-BIASED
-1.01	-11.16	2.993e-22	1.249e-21	RNF165	FETAL-BIASED
-1.01	-10.99	9.215e-22	3.712e-21	SPAG17	FETAL-BIASED
-1.01	-11	8.278e-22	3.345e-21	MARCH11	FETAL-BIASED
-1.01	-10.84	2.466e-21	9.648e-21	LOC101929163	FETAL-BIASED
-1.01	-10.51	2.163e-20	7.967e-20	HIST1H4K	FETAL-BIASED
-1.01	-9.7	3.946e-18	1.263e-17	LOC100129940	FETAL-BIASED
-1.01	-9.62	6.679e-18	2.108e-17	KLHL3	FETAL-BIASED
-1.01	-9.46	1.797e-17	5.523e-17	CDH8	FETAL-BIASED
-1.01	-9.04	2.582e-16	7.414e-16	C3orf49	FETAL-BIASED
-1.01	-8.77	1.393e-15	3.832e-15	LINC00354	FETAL-BIASED
-1.01	-8.76	1.551e-15	4.258e-15	LINC00506	FETAL-BIASED
-1.01	-8.18	5.284e-14	1.331e-13	CCDC89	FETAL-BIASED
-1.01	-7.35	6.979e-12	1.563e-11	NCOA7-AS1	FETAL-BIASED
-1.01	-7.05	3.846e-11	8.245e-11	ENOX1-AS2	FETAL-BIASED
-1.01	-6.33	1.952e-09	3.791e-09	POU3F4	FETAL-BIASED
-1.01	-5.49	1.36e-07	2.377e-07	MIR1262	FETAL-BIASED
-1.01	-5.28	3.809e-07	6.479e-07	LINC00333	FETAL-BIASED
-1.01	-5.06	1.063e-06	1.762e-06	HOXA-AS2	FETAL-BIASED
-1.01	-4.77	3.846e-06	6.173e-06	ADH1B	FETAL-BIASED
-1	-21.19	1.565e-50	3.232e-48	SUPT3H	FETAL-BIASED
-1	-20	2.125e-47	2.093e-45	ASF1A	FETAL-BIASED
-1	-19.3	1.725e-45	1.14e-43	FER	FETAL-BIASED
-1	-19.12	5.183e-45	3.17e-43	RNPC3	FETAL-BIASED
-1	-18.36	6.176e-43	2.55e-41	SRSF11	FETAL-BIASED
-1	-18.36	6.246e-43	2.571e-41	LRRC40	FETAL-BIASED
-1	-18.16	2.241e-42	8.433e-41	NAPEPLD	FETAL-BIASED
-1	-17.07	2.536e-39	5.811e-38	SEMA3C	FETAL-BIASED
-1	-16.8	1.493e-38	3.088e-37	PPIL1	FETAL-BIASED
-1	-16.68	3.2e-38	6.365e-37	UQCRC2	FETAL-BIASED
-1	-16.31	3.723e-37	6.477e-36	MRPS18C	FETAL-BIASED
-1	-16.31	3.723e-37	6.477e-36	RNU4ATAC	FETAL-BIASED
-1	-16.27	4.619e-37	7.97e-36	HELQ	FETAL-BIASED
-1	-15.83	8.278e-36	1.225e-34	UQCRB	FETAL-BIASED
-1	-15.57	4.791e-35	6.422e-34	RAD51AP1	FETAL-BIASED
-1	-15.15	7.575e-34	8.833e-33	TMEM67	FETAL-BIASED
-1	-15.12	9.241e-34	1.066e-32	ZNF91	FETAL-BIASED
-1	-15.04	1.6e-33	1.802e-32	BRIP1	FETAL-BIASED
-1	-15.04	1.555e-33	1.754e-32	ZNF614	FETAL-BIASED
-1	-14.87	4.906e-33	5.272e-32	NUDCD2	FETAL-BIASED
-1	-14.8	7.854e-33	8.192e-32	RAB30-AS1	FETAL-BIASED
-1	-14.75	1.136e-32	1.16e-31	PTK7	FETAL-BIASED
-1	-14.71	1.411e-32	1.429e-31	MRPS21	FETAL-BIASED
-1	-14.44	8.811e-32	8.228e-31	CCDC90B	FETAL-BIASED
-1	-14.43	9.36e-32	8.714e-31	ING3	FETAL-BIASED
-1	-13.89	3.525e-30	2.76e-29	GLA	FETAL-BIASED
-1	-13.68	1.373e-29	1.013e-28	RSRC2	FETAL-BIASED
-1	-13.59	2.525e-29	1.823e-28	RBM39	FETAL-BIASED
-1	-13.31	1.645e-28	1.109e-27	EPM2AIP1	FETAL-BIASED
-1	-13.26	2.381e-28	1.581e-27	MLH1	FETAL-BIASED
-1	-12.9	2.696e-27	1.634e-26	DPH5	FETAL-BIASED
-1	-12.9	2.712e-27	1.643e-26	LOC102606465	FETAL-BIASED
-1	-12.37	9.516e-26	5.138e-25	CDO1	FETAL-BIASED
-1	-10.72	5.235e-21	2.009e-20	ARHGAP18	FETAL-BIASED
-1	-8.59	4.352e-15	1.162e-14	GLYATL1	FETAL-BIASED
-1	-7.01	4.873e-11	1.038e-10	MAB21L1	FETAL-BIASED
-1	-5.69	5.092e-08	9.133e-08	MYCT1	FETAL-BIASED
-1	-4.17	4.709e-05	7.08e-05	LINC01851	FETAL-BIASED
-0.99	-19.57	3.225e-46	2.38e-44	WASF1	FETAL-BIASED
-0.99	-18.79	4.235e-44	2.12e-42	FGFBP3	FETAL-BIASED
-0.99	-18.14	2.664e-42	9.925e-41	ZNF420	FETAL-BIASED
-0.99	-17.47	1.926e-40	5.19e-39	CSDE1	FETAL-BIASED
-0.99	-17.23	8.942e-40	2.161e-38	MBIP	FETAL-BIASED
-0.99	-16.85	1.033e-38	2.177e-37	ETFRF1	FETAL-BIASED
-0.99	-16.8	1.474e-38	3.051e-37	CASC1	FETAL-BIASED
-0.99	-16.7	2.819e-38	5.649e-37	CCDC14	FETAL-BIASED
-0.99	-16.25	5.296e-37	9.027e-36	RAB3C	FETAL-BIASED
-0.99	-15.82	8.911e-36	1.313e-34	ZNF649	FETAL-BIASED
-0.99	-14.94	3.208e-33	3.498e-32	HIST1H3A	FETAL-BIASED
-0.99	-14.6	2.913e-32	2.853e-31	C3orf14	FETAL-BIASED
-0.99	-14.55	4.234e-32	4.069e-31	PTPRG-AS1	FETAL-BIASED
-0.99	-14.27	2.681e-31	2.366e-30	FKBP7	FETAL-BIASED
-0.99	-14.05	1.22e-30	9.988e-30	EXOC4	FETAL-BIASED
-0.99	-13.75	9.155e-30	6.874e-29	BASP1	FETAL-BIASED
-0.99	-13.47	5.642e-29	3.943e-28	UFC1	FETAL-BIASED
-0.99	-13.18	4.033e-28	2.624e-27	RPL34	FETAL-BIASED
-0.99	-13.18	4.09e-28	2.66e-27	ZRANB3	FETAL-BIASED
-0.99	-12.84	3.876e-27	2.312e-26	R3HDM1	FETAL-BIASED
-0.99	-12.27	1.827e-25	9.649e-25	SPSB4	FETAL-BIASED
-0.99	-12.3	1.458e-25	7.758e-25	HMBOX1	FETAL-BIASED
-0.99	-12.02	9.733e-25	4.859e-24	LOC642366	FETAL-BIASED
-0.99	-11.89	2.347e-24	1.143e-23	ITGB8	FETAL-BIASED
-0.99	-11.76	5.503e-24	2.603e-23	PLCB4	FETAL-BIASED
-0.99	-11.63	1.282e-23	5.892e-23	HIST1H1B	FETAL-BIASED
-0.99	-11.51	2.817e-23	1.265e-22	NFATC2	FETAL-BIASED
-0.99	-11.36	7.764e-23	3.382e-22	PDZRN3-AS1	FETAL-BIASED
-0.99	-10.89	1.72e-21	6.801e-21	ENSA	FETAL-BIASED
-0.99	-9.69	4.216e-18	1.347e-17	SGK1	FETAL-BIASED
-0.99	-9.67	4.764e-18	1.517e-17	SLC19A3	FETAL-BIASED
-0.99	-8.93	5.102e-16	1.444e-15	LOC101927623	FETAL-BIASED
-0.99	-8.64	3.112e-15	8.379e-15	DCC	FETAL-BIASED
-0.99	-6.9	8.824e-11	1.852e-10	LOC101929084	FETAL-BIASED
-0.99	-5.47	1.526e-07	2.657e-07	NAT2	FETAL-BIASED
-0.99	-5.05	1.095e-06	1.814e-06	SFTA1P	FETAL-BIASED
-0.99	-4.76	4.065e-06	6.517e-06	MGC27382	FETAL-BIASED
-0.99	-4.08	6.89e-05	0.0001025	LINC00547	FETAL-BIASED
-0.98	-21.52	2.126e-51	5.593e-49	PGAP1	FETAL-BIASED
-0.98	-18.35	6.673e-43	2.722e-41	TOMM7	FETAL-BIASED
-0.98	-18.06	4.209e-42	1.518e-40	LNP1	FETAL-BIASED
-0.98	-17.77	2.708e-41	8.345e-40	THAP10	FETAL-BIASED
-0.98	-16.56	7.212e-38	1.378e-36	LINC00467	FETAL-BIASED
-0.98	-16.34	2.891e-37	5.102e-36	TTC8	FETAL-BIASED
-0.98	-16.1	1.423e-36	2.315e-35	SRP54	FETAL-BIASED
-0.98	-16.01	2.681e-36	4.222e-35	ZNF695	FETAL-BIASED
-0.98	-15.92	4.844e-36	7.392e-35	BMT2	FETAL-BIASED
-0.98	-15.45	1.057e-34	1.359e-33	LOC101929140	FETAL-BIASED
-0.98	-14.26	2.877e-31	2.53e-30	LOC646903	FETAL-BIASED
-0.98	-14.22	3.883e-31	3.359e-30	S1PR1	FETAL-BIASED
-0.98	-14.08	9.883e-31	8.172e-30	SERINC1	FETAL-BIASED
-0.98	-13.5	4.876e-29	3.427e-28	BCAS2	FETAL-BIASED
-0.98	-13.3	1.763e-28	1.185e-27	KNTC1	FETAL-BIASED
-0.98	-13.09	7.215e-28	4.591e-27	RPL34-AS1	FETAL-BIASED
-0.98	-12.51	3.588e-26	1.992e-25	DLGAP1-AS1	FETAL-BIASED
-0.98	-11.82	3.546e-24	1.702e-23	KAT7	FETAL-BIASED
-0.98	-11.79	4.42e-24	2.106e-23	INTS9	FETAL-BIASED
-0.98	-11.65	1.16e-23	5.348e-23	SOX5	FETAL-BIASED
-0.98	-11.64	1.17e-23	5.392e-23	ILF2	FETAL-BIASED
-0.98	-11.55	2.186e-23	9.886e-23	ZNF732	FETAL-BIASED
-0.98	-11.07	5.145e-22	2.106e-21	ECHDC1	FETAL-BIASED
-0.98	-11.06	5.578e-22	2.28e-21	ALG10	FETAL-BIASED
-0.98	-10.51	2.081e-20	7.675e-20	CPED1	FETAL-BIASED
-0.98	-9.7	4.017e-18	1.285e-17	LCA5L	FETAL-BIASED
-0.98	-9.61	6.957e-18	2.192e-17	LOC101928386	FETAL-BIASED
-0.98	-9.46	1.847e-17	5.671e-17	PPFIA2	FETAL-BIASED
-0.98	-8.92	5.629e-16	1.588e-15	ZNF532	FETAL-BIASED
-0.98	-7.18	1.864e-11	4.067e-11	TLR6	FETAL-BIASED
-0.98	-6.42	1.169e-09	2.301e-09	GABRA4	FETAL-BIASED
-0.98	-6.29	2.334e-09	4.515e-09	ADH1C	FETAL-BIASED
-0.98	-6.2	3.898e-09	7.451e-09	CFI	FETAL-BIASED
-0.98	-6.19	4.049e-09	7.734e-09	RIT2	FETAL-BIASED
-0.98	-5.99	1.108e-08	2.066e-08	MIR4705	FETAL-BIASED
-0.98	-5.22	5.026e-07	8.491e-07	LOC101929294	FETAL-BIASED
-0.98	-4.86	2.604e-06	4.22e-06	LINC01241	FETAL-BIASED
-0.98	-4.77	3.84e-06	6.165e-06	PCDH9-AS3	FETAL-BIASED
-0.98	-4.71	5.032e-06	8.02e-06	SNORD114-16	FETAL-BIASED
-0.98	-4.15	5.066e-05	7.602e-05	FABP2	FETAL-BIASED
-0.97	-19.34	1.28e-45	8.601e-44	ACBD5	FETAL-BIASED
-0.97	-17.95	8.793e-42	2.992e-40	UBR1	FETAL-BIASED
-0.97	-17.96	8.173e-42	2.806e-40	BLOC1S6	FETAL-BIASED
-0.97	-17.45	2.113e-40	5.667e-39	COX7C	FETAL-BIASED
-0.97	-16.28	4.554e-37	7.862e-36	SPC25	FETAL-BIASED
-0.97	-16.14	1.134e-36	1.868e-35	ZNF790	FETAL-BIASED
-0.97	-15.85	7.379e-36	1.102e-34	GTPBP10	FETAL-BIASED
-0.97	-15.73	1.648e-35	2.338e-34	ISCU	FETAL-BIASED
-0.97	-15.67	2.482e-35	3.45e-34	CTDSPL2	FETAL-BIASED
-0.97	-15.54	5.637e-35	7.507e-34	KIFAP3	FETAL-BIASED
-0.97	-15.43	1.203e-34	1.535e-33	PSMA3	FETAL-BIASED
-0.97	-15.42	1.313e-34	1.666e-33	TRERF1	FETAL-BIASED
-0.97	-15.37	1.775e-34	2.221e-33	KLF12	FETAL-BIASED
-0.97	-15.29	3.032e-34	3.69e-33	RBM12B-AS1	FETAL-BIASED
-0.97	-14.91	3.79e-33	4.112e-32	MEIS2	FETAL-BIASED
-0.97	-14.83	6.427e-33	6.779e-32	CEP57	FETAL-BIASED
-0.97	-14.35	1.639e-31	1.487e-30	NDUFAF4P1	FETAL-BIASED
-0.97	-14.27	2.714e-31	2.391e-30	KNL1	FETAL-BIASED
-0.97	-14.16	5.711e-31	4.835e-30	FIGN	FETAL-BIASED
-0.97	-14.03	1.322e-30	1.08e-29	PKIB	FETAL-BIASED
-0.97	-13.73	1.018e-29	7.587e-29	ITFG2	FETAL-BIASED
-0.97	-12.4	7.414e-26	4.035e-25	TENM4	FETAL-BIASED
-0.97	-12.02	9.838e-25	4.908e-24	ARHGAP24	FETAL-BIASED
-0.97	-11.93	1.763e-24	8.651e-24	NRSN1	FETAL-BIASED
-0.97	-11.79	4.534e-24	2.157e-23	ISL1	FETAL-BIASED
-0.97	-11.29	1.229e-22	5.275e-22	ZWILCH	FETAL-BIASED
-0.97	-11.16	2.911e-22	1.216e-21	PTPRD	FETAL-BIASED
-0.97	-9.97	7.09e-19	2.374e-18	FRRS1	FETAL-BIASED
-0.97	-7.43	4.252e-12	9.636e-12	LINC02003	FETAL-BIASED
-0.97	-6.83	1.29e-10	2.681e-10	COL6A3	FETAL-BIASED
-0.97	-6.42	1.222e-09	2.402e-09	SRI	FETAL-BIASED
-0.97	-6.34	1.808e-09	3.518e-09	SNORD56B	FETAL-BIASED
-0.97	-6.14	5.331e-09	1.012e-08	SNORD79	FETAL-BIASED
-0.97	-6.05	8.434e-09	1.581e-08	SNORD78	FETAL-BIASED
-0.97	-5.54	1.065e-07	1.875e-07	MIR4273	FETAL-BIASED
-0.97	-2.08	0.03922	0.04703	TTTY17B	FETAL-BIASED
-0.96	-21.06	3.409e-50	6.503e-48	PLK4	FETAL-BIASED
-0.96	-19.78	8.495e-47	7.169e-45	PROSER1	FETAL-BIASED
-0.96	-19.17	3.808e-45	2.377e-43	RTTN	FETAL-BIASED
-0.96	-18.45	3.577e-43	1.538e-41	LOC101928436	FETAL-BIASED
-0.96	-17.68	5.02e-41	1.494e-39	PCDH9	FETAL-BIASED
-0.96	-17.48	1.766e-40	4.785e-39	LOC102546294	FETAL-BIASED
-0.96	-16.74	2.206e-38	4.466e-37	ZNF207	FETAL-BIASED
-0.96	-16.35	2.814e-37	4.975e-36	SEMA6A	FETAL-BIASED
-0.96	-16.26	4.997e-37	8.573e-36	FAM227B	FETAL-BIASED
-0.96	-15.82	9.428e-36	1.383e-34	TUSC3	FETAL-BIASED
-0.96	-15.76	1.369e-35	1.968e-34	BCLAF1	FETAL-BIASED
-0.96	-15.26	3.757e-34	4.525e-33	KBTBD6	FETAL-BIASED
-0.96	-15.18	6.366e-34	7.494e-33	MALAT1	FETAL-BIASED
-0.96	-15.03	1.679e-33	1.886e-32	CEP170	FETAL-BIASED
-0.96	-14.39	1.184e-31	1.091e-30	COPB1	FETAL-BIASED
-0.96	-14.38	1.312e-31	1.202e-30	ZNF85	FETAL-BIASED
-0.96	-14.25	3.203e-31	2.799e-30	RUNX1T1	FETAL-BIASED
-0.96	-13.89	3.529e-30	2.762e-29	ZNF175	FETAL-BIASED
-0.96	-13.66	1.671e-29	1.224e-28	LOC101928370	FETAL-BIASED
-0.96	-13.32	1.573e-28	1.063e-27	DCTN4	FETAL-BIASED
-0.96	-13.15	5.083e-28	3.278e-27	SUGT1P1	FETAL-BIASED
-0.96	-12.71	9.367e-27	5.427e-26	VTA1	FETAL-BIASED
-0.96	-12.67	1.2e-26	6.902e-26	NMBR	FETAL-BIASED
-0.96	-11.83	3.402e-24	1.635e-23	PCSK2	FETAL-BIASED
-0.96	-11.71	7.359e-24	3.446e-23	CEP162	FETAL-BIASED
-0.96	-10.11	2.904e-19	9.964e-19	TUBB2B	FETAL-BIASED
-0.96	-9.48	1.633e-17	5.032e-17	DSG2-AS1	FETAL-BIASED
-0.96	-8.31	2.41e-14	6.184e-14	LRP1B	FETAL-BIASED
-0.96	-6.85	1.157e-10	2.412e-10	PDE4D	FETAL-BIASED
-0.96	-6.73	2.229e-10	4.562e-10	PART1	FETAL-BIASED
-0.96	-6.35	1.741e-09	3.389e-09	CATSPERB	FETAL-BIASED
-0.96	-6.36	1.694e-09	3.299e-09	LOC101929584	FETAL-BIASED
-0.96	-5.88	1.938e-08	3.562e-08	GNE	FETAL-BIASED
-0.96	-5.83	2.513e-08	4.588e-08	SLCO1C1	FETAL-BIASED
-0.96	-5.59	8.354e-08	1.479e-07	SPINK1	FETAL-BIASED
-0.96	-5.49	1.391e-07	2.431e-07	C14orf105	FETAL-BIASED
-0.96	-4.97	1.568e-06	2.572e-06	HPGDS	FETAL-BIASED
-0.96	-4.68	5.689e-06	9.036e-06	SNORD113-8	FETAL-BIASED
-0.96	-4.18	4.528e-05	6.814e-05	ZNF33BP1	FETAL-BIASED
-0.96	-2.47	0.01436	0.01791	RBMY1F	FETAL-BIASED
-0.96	-2.43	0.01623	0.02015	USP17L29	FETAL-BIASED
-0.95	-18.23	1.502e-42	5.845e-41	FARSB	FETAL-BIASED
-0.95	-17.41	2.726e-40	7.176e-39	FBXO38	FETAL-BIASED
-0.95	-17.26	7.599e-40	1.865e-38	ANAPC10	FETAL-BIASED
-0.95	-16.7	2.906e-38	5.805e-37	MIR632	FETAL-BIASED
-0.95	-16.48	1.17e-37	2.182e-36	ARHGAP19-SLIT1	FETAL-BIASED
-0.95	-16.48	1.17e-37	2.182e-36	ARHGAP19	FETAL-BIASED
-0.95	-16.12	1.248e-36	2.046e-35	DTWD1	FETAL-BIASED
-0.95	-15.71	1.878e-35	2.649e-34	PRRC2C	FETAL-BIASED
-0.95	-15.48	8.604e-35	1.12e-33	ZNF221	FETAL-BIASED
-0.95	-15.43	1.219e-34	1.553e-33	MIS18BP1	FETAL-BIASED
-0.95	-15.29	3.007e-34	3.662e-33	CCND2	FETAL-BIASED
-0.95	-14.9	3.999e-33	4.321e-32	LOC101928812	FETAL-BIASED
-0.95	-14.69	1.647e-32	1.662e-31	MANEA-AS1	FETAL-BIASED
-0.95	-14.64	2.26e-32	2.235e-31	MAP2K4P1	FETAL-BIASED
-0.95	-14.63	2.407e-32	2.376e-31	WRAP53	FETAL-BIASED
-0.95	-14.39	1.217e-31	1.119e-30	ZNF671	FETAL-BIASED
-0.95	-13.92	2.866e-30	2.265e-29	UBQLN2	FETAL-BIASED
-0.95	-13.92	2.814e-30	2.227e-29	SERPINI1	FETAL-BIASED
-0.95	-13.87	3.981e-30	3.096e-29	MYEF2	FETAL-BIASED
-0.95	-13.83	5.274e-30	4.062e-29	GRIA2	FETAL-BIASED
-0.95	-13.28	2.096e-28	1.397e-27	PJA2	FETAL-BIASED
-0.95	-13.02	1.179e-27	7.366e-27	LRRC9	FETAL-BIASED
-0.95	-12.33	1.236e-25	6.614e-25	ID4	FETAL-BIASED
-0.95	-11.42	5.368e-23	2.366e-22	CENPW	FETAL-BIASED
-0.95	-11.24	1.747e-22	7.407e-22	CDH11	FETAL-BIASED
-0.95	-9.6	7.538e-18	2.37e-17	GULP1	FETAL-BIASED
-0.95	-8.67	2.619e-15	7.081e-15	STMN2	FETAL-BIASED
-0.95	-8.4	1.335e-14	3.471e-14	CCL2	FETAL-BIASED
-0.95	-7.98	1.735e-13	4.254e-13	SNORD61	FETAL-BIASED
-0.95	-7.96	2.002e-13	4.894e-13	MEOX2	FETAL-BIASED
-0.95	-7.43	4.485e-12	1.015e-11	SCML4	FETAL-BIASED
-0.95	-7.41	4.997e-12	1.127e-11	SLC7A11	FETAL-BIASED
-0.95	-6.15	5.038e-09	9.581e-09	EHBP1	FETAL-BIASED
-0.95	-6.14	5.366e-09	1.018e-08	MIR30D	FETAL-BIASED
-0.95	-6.11	6.049e-09	1.145e-08	LOC102724804	FETAL-BIASED
-0.95	-5.38	2.372e-07	4.083e-07	MIR4529	FETAL-BIASED
-0.95	-5.21	5.108e-07	8.626e-07	CMAHP	FETAL-BIASED
-0.95	-4.91	2.08e-06	3.386e-06	SNORD45B	FETAL-BIASED
-0.95	-4.53	1.064e-05	1.663e-05	GNGT1	FETAL-BIASED
-0.95	-4.44	1.573e-05	2.433e-05	LOC105369146	FETAL-BIASED
-0.95	-3.82	0.0001868	0.0002705	LOC105374704	FETAL-BIASED
-0.94	-21.75	5.225e-52	1.685e-49	SPAG16	FETAL-BIASED
-0.94	-20.2	6.254e-48	7.08e-46	LINC00476	FETAL-BIASED
-0.94	-18.98	1.233e-44	7e-43	PPP1R12A	FETAL-BIASED
-0.94	-17.95	8.686e-42	2.963e-40	DCDC1	FETAL-BIASED
-0.94	-17.96	7.933e-42	2.737e-40	TUBB	FETAL-BIASED
-0.94	-17.9	1.191e-41	3.953e-40	ASPM	FETAL-BIASED
-0.94	-17.58	9.648e-41	2.714e-39	MBTPS2	FETAL-BIASED
-0.94	-17.01	3.847e-39	8.578e-38	ZCCHC11	FETAL-BIASED
-0.94	-15.33	2.285e-34	2.822e-33	FNBP4	FETAL-BIASED
[truncated: 20,669 more rows]

## Sheet: Aging Promoter Accessibility
logFC	t	P.Value	adj.P.Val	DIR	GENE
-12.49	-4.2	0.0002925	0.002009	YOUNG-BIASED	RPS4Y1
-12.31	-3.26	0.003169	0.01129	YOUNG-BIASED	TTTY14
-12.16	-7.04	2.105e-07	3.988e-05	YOUNG-BIASED	ZFY-AS1
-12.14	-8.75	4.129e-09	1.713e-05	YOUNG-BIASED	GYG2P1
-12.08	-5.53	9.255e-06	0.0002165	YOUNG-BIASED	PRKY
-11.77	-4.31	0.0002191	0.001646	YOUNG-BIASED	UTY
-11.75	-3.81	0.0008034	0.004138	YOUNG-BIASED	KDM5D
-11.48	-3.59	0.001411	0.006218	YOUNG-BIASED	TXLNGY
-11.3	-3.64	0.001225	0.005603	YOUNG-BIASED	DDX3Y
-11.05	-3.67	0.001133	0.005299	YOUNG-BIASED	EIF1AY
-11.01	-6.26	1.454e-06	8.106e-05	YOUNG-BIASED	TTTY20
-10.98	-4.66	8.746e-05	0.0008968	YOUNG-BIASED	RBMY2FP
-10.78	-5.41	1.277e-05	0.000263	YOUNG-BIASED	TBL1Y
-10.69	-5.35	1.469e-05	0.0002879	YOUNG-BIASED	RBMY1A3P
-10.65	-6.64	5.597e-07	5.454e-05	YOUNG-BIASED	LINC00278
-10.52	-3.67	0.001138	0.005314	YOUNG-BIASED	TTTY15
-10.47	-3.43	0.002094	0.008295	YOUNG-BIASED	ZFY
-10.4	-6.95	2.654e-07	4.136e-05	YOUNG-BIASED	LOC100652931
-10.34	-5.36	1.434e-05	0.0002842	YOUNG-BIASED	TTTY11
-10.28	-5.84	4.158e-06	0.0001378	YOUNG-BIASED	NLGN4Y
-10.28	-6.03	2.565e-06	0.00011	YOUNG-BIASED	TMSB4Y
-9.99	-3.84	0.0007389	0.003909	YOUNG-BIASED	TTTY16
-9.9	-4.96	4.033e-05	0.000538	YOUNG-BIASED	SRY
-9.84	-6.78	4.027e-07	4.805e-05	YOUNG-BIASED	RBMY3AP
-9.72	-8.78	3.829e-09	1.713e-05	YOUNG-BIASED	TTTY12
-9.67	-9.05	2.151e-09	1.713e-05	YOUNG-BIASED	USP9Y
-9.42	-5.12	2.67e-05	0.0004147	YOUNG-BIASED	PCDH11Y
-9.42	-8.85	3.347e-09	1.713e-05	YOUNG-BIASED	TTTY5
-9.4	-8.09	1.815e-08	2.049e-05	YOUNG-BIASED	FAM197Y7P
-9.38	-4.61	9.993e-05	0.0009822	YOUNG-BIASED	NLGN4Y-AS1
-9.11	-8.15	1.579e-08	2.036e-05	YOUNG-BIASED	FAM197Y9
-9.05	-3.27	0.003144	0.01123	YOUNG-BIASED	RPS4Y2
-8.98	-5.85	4.068e-06	0.0001368	YOUNG-BIASED	FAM197Y3
-8.87	-4.11	0.000366	0.002361	YOUNG-BIASED	AMELY
-8.81	-4.19	0.0003011	0.00205	YOUNG-BIASED	BCORP1
-8.81	-5.12	2.642e-05	0.0004125	YOUNG-BIASED	FAM197Y6
-8.79	-5.45	1.15e-05	0.0002465	YOUNG-BIASED	FAM197Y4P
-8.74	-5.15	2.464e-05	0.0003946	YOUNG-BIASED	RBMY2EP
-8.32	-4.87	5.144e-05	0.0006333	YOUNG-BIASED	PRORY
-8.27	-6.54	7.289e-07	6.042e-05	YOUNG-BIASED	TTTY18
-8.13	-8.27	1.189e-08	1.859e-05	YOUNG-BIASED	SMA5
-8.01	-5.01	3.536e-05	0.0004955	YOUNG-BIASED	TTTY10
-7.98	-4.41	0.000168	0.001381	YOUNG-BIASED	TTTY13
-7.75	-6.44	9.148e-07	6.436e-05	YOUNG-BIASED	TSPY10
-7.55	-8.09	1.809e-08	2.049e-05	YOUNG-BIASED	DAZ4
-7.5	-10.54	1e-10	2.71e-06	YOUNG-BIASED	MIR586
-7.3	-5.59	7.842e-06	0.0001958	YOUNG-BIASED	TSPY2
-7.23	-5.89	3.723e-06	0.0001311	YOUNG-BIASED	LINC00279
-6.87	-6.98	2.43e-07	4.089e-05	YOUNG-BIASED	RHOXF2B
-6.67	-4.19	0.0003011	0.00205	YOUNG-BIASED	PRY
-6.32	-4.35	0.0001975	0.001531	YOUNG-BIASED	TTTY19
-6.19	-4.23	0.0002696	0.001898	YOUNG-BIASED	TGIF2LY
-6.11	-3.18	0.003843	0.01303	YOUNG-BIASED	TSPY1
-6.05	-4.95	4.2e-05	0.0005515	YOUNG-BIASED	TSPY8
-6	-3.46	0.001931	0.007818	YOUNG-BIASED	CHRFAM7A
-5.68	-4.38	0.0001811	0.001452	YOUNG-BIASED	TSPY4
-5.4	-2.94	0.006942	0.02048	YOUNG-BIASED	LINC01138
-4.91	-2.53	0.0179	0.04274	YOUNG-BIASED	APOBEC3B
-4.79	-2.89	0.007744	0.02234	YOUNG-BIASED	TTTY4B
-4.78	-3.48	0.001831	0.007526	YOUNG-BIASED	PRR23D2
-4.68	-5.64	7.036e-06	0.0001864	YOUNG-BIASED	FGB
-4.63	-3.2	0.003664	0.01258	YOUNG-BIASED	MBD3L2
-4.55	-4.28	0.0002402	0.001752	YOUNG-BIASED	LOC101928509
-4.55	-3.65	0.001183	0.005461	YOUNG-BIASED	OR4F21
-4.48	-3.3	0.002882	0.01052	YOUNG-BIASED	SPATA31A3
-4.46	-2.8	0.00958	0.02622	YOUNG-BIASED	FAM224B
-4.39	-4.17	0.0003129	0.00211	YOUNG-BIASED	TNNI3K
-4.35	-2.71	0.012	0.03128	YOUNG-BIASED	ACOT1
-4.2	-3.57	0.001474	0.006431	YOUNG-BIASED	WASH7P
-4.19	-3.46	0.001948	0.007872	YOUNG-BIASED	TTTY9B
-4.17	-2.65	0.01378	0.03477	YOUNG-BIASED	SMN1
-4.09	-2.49	0.01979	0.04627	YOUNG-BIASED	NAIP
-3.98	-3.11	0.004589	0.0149	YOUNG-BIASED	POTEH-AS1
-3.87	-5.86	3.943e-06	0.0001347	YOUNG-BIASED	LOC105374820
-3.73	-2.78	0.0101	0.02728	YOUNG-BIASED	SI
-3.73	-2.49	0.01966	0.04601	YOUNG-BIASED	TTTY23
-3.64	-4.85	5.373e-05	0.0006489	YOUNG-BIASED	RRH
-3.5	-2.99	0.006118	0.01858	YOUNG-BIASED	FBXW7-AS1
-3.37	-2.82	0.009254	0.02554	YOUNG-BIASED	PCDHA11
-3.34	-2.98	0.006308	0.01904	YOUNG-BIASED	KLRK1
-3.15	-6.75	4.263e-07	4.935e-05	YOUNG-BIASED	MIR16-2
-3.14	-6.73	4.522e-07	4.967e-05	YOUNG-BIASED	MIR15B
-3.12	-5.97	3.031e-06	0.0001188	YOUNG-BIASED	GRM5-AS1
-3.08	-4.24	0.0002602	0.001855	YOUNG-BIASED	LOC102723883
-3.07	-3.74	0.0009555	0.004663	YOUNG-BIASED	LOC101928020
-3.02	-3.83	0.0007571	0.003977	YOUNG-BIASED	LOC101928283
-2.99	-4.1	0.0003798	0.002424	YOUNG-BIASED	CCDC158
-2.92	-6.7	4.874e-07	5.059e-05	YOUNG-BIASED	MIR3169
-2.92	-3.44	0.002044	0.008166	YOUNG-BIASED	PCDH9-AS4
-2.86	-3.08	0.004976	0.01583	YOUNG-BIASED	XKR3
-2.85	-7.35	1.003e-07	3.301e-05	YOUNG-BIASED	SNORD113-4
-2.83	-3.54	0.001573	0.006745	YOUNG-BIASED	CYP7A1
-2.82	-4.25	0.000256	0.001836	YOUNG-BIASED	LINC01821
-2.81	-5.51	9.787e-06	0.0002241	YOUNG-BIASED	DEFB114
-2.77	-2.56	0.01681	0.04071	YOUNG-BIASED	FAM90A7P
-2.77	-2.56	0.01681	0.04071	YOUNG-BIASED	RBMY1F
-2.64	-4.73	7.403e-05	0.0008041	YOUNG-BIASED	CSN1S1
-2.58	-3.5	0.00175	0.007278	YOUNG-BIASED	SNORD113-2
-2.56	-2.55	0.0174	0.04183	YOUNG-BIASED	MIR561
-2.53	-4.28	0.0002356	0.001727	YOUNG-BIASED	SERPINI2
-2.51	-3.5	0.00176	0.007312	YOUNG-BIASED	LINC00924
-2.39	-3.7	0.001043	0.004978	YOUNG-BIASED	LINC02032
-2.36	-2.5	0.01934	0.04545	YOUNG-BIASED	MIR1264
-2.35	-2.62	0.01478	0.0367	YOUNG-BIASED	CYLC2
-2.31	-5.82	4.45e-06	0.0001424	YOUNG-BIASED	LOC102724919
-2.24	-3.81	0.0007914	0.004094	YOUNG-BIASED	LINC01365
-2.24	-5.75	5.317e-06	0.0001576	YOUNG-BIASED	MIR644A
-2.23	-2.47	0.0204	0.04733	YOUNG-BIASED	MIR1-2
-2.22	-6.22	1.6e-06	8.584e-05	YOUNG-BIASED	MTHFD2P1
-2.22	-2.63	0.01426	0.0357	YOUNG-BIASED	LOC100130964
-2.21	-6.22	1.594e-06	8.567e-05	YOUNG-BIASED	MIR4657
-2.13	-3.33	0.002651	0.009884	YOUNG-BIASED	CRISP3
-2.11	-4.37	0.0001876	0.001481	YOUNG-BIASED	OPA1-AS1
-2.11	-6.13	1.99e-06	9.565e-05	YOUNG-BIASED	PCDHB14
-2.09	-3.26	0.003185	0.01133	YOUNG-BIASED	LINC00448
-2.09	-3.89	0.0006511	0.003563	YOUNG-BIASED	LINC00597
-2.06	-5.32	1.591e-05	0.0003019	YOUNG-BIASED	LINC00377
-2.04	-3.45	0.00198	0.007966	YOUNG-BIASED	LOC105374516
-2.02	-6.73	4.495e-07	4.967e-05	YOUNG-BIASED	ADRA2C
-2.02	-2.65	0.01373	0.03467	YOUNG-BIASED	MIR548E
-2.01	-4.83	5.641e-05	0.0006717	YOUNG-BIASED	LOC643733
-2.01	-3.54	0.001567	0.006727	YOUNG-BIASED	LINC00566
-2	-5.69	6.18e-06	0.0001726	YOUNG-BIASED	SNORD126
-1.99	-5.02	3.507e-05	0.0004922	YOUNG-BIASED	LRRC39
-1.98	-4.45	0.0001521	0.001298	YOUNG-BIASED	ALPK1
-1.98	-4.19	0.0002995	0.002043	YOUNG-BIASED	MIR3974
-1.98	-4.46	0.0001473	0.001271	YOUNG-BIASED	OR6C68
-1.96	-5.1	2.843e-05	0.0004306	YOUNG-BIASED	GJA9-MYCBP
-1.96	-5.1	2.843e-05	0.0004306	YOUNG-BIASED	GJA9
-1.94	-8.21	1.372e-08	1.859e-05	YOUNG-BIASED	MGAT3
-1.92	-4.91	4.598e-05	0.0005878	YOUNG-BIASED	OSTN
-1.92	-5.47	1.08e-05	0.0002377	YOUNG-BIASED	N4BP2L2-IT2
-1.91	-3.8	0.0008088	0.004156	YOUNG-BIASED	MIR630
-1.89	-4.69	8.147e-05	0.0008578	YOUNG-BIASED	LRRC70
-1.89	-4.69	8.147e-05	0.0008578	YOUNG-BIASED	IPO11-LRRC70
-1.89	-4.12	0.000356	0.002312	YOUNG-BIASED	MIR548F3
-1.87	-6.93	2.8e-07	4.168e-05	YOUNG-BIASED	EBF4
-1.85	-3.85	0.0007236	0.003849	YOUNG-BIASED	LINC01360
-1.83	-5.74	5.391e-06	0.000159	YOUNG-BIASED	CACNA1H
-1.82	-3.91	0.0006133	0.003406	YOUNG-BIASED	DNAJA1P5
-1.82	-7.73	4.124e-08	2.818e-05	YOUNG-BIASED	FAM69B
-1.8	-4.7	7.95e-05	0.0008444	YOUNG-BIASED	MIR3688-2
-1.8	-4.51	0.0001317	0.001177	YOUNG-BIASED	MIR103A1
-1.8	-4.05	0.00043	0.002659	YOUNG-BIASED	LOC105369738
-1.8	-3.81	0.0007915	0.004094	YOUNG-BIASED	MIR548AS
-1.78	-7.23	1.344e-07	3.413e-05	YOUNG-BIASED	CPLX1
-1.78	-4.4	0.000175	0.001416	YOUNG-BIASED	CXCL9
-1.78	-4.76	6.749e-05	0.0007587	YOUNG-BIASED	MIR103B1
-1.78	-4.9	4.677e-05	0.0005946	YOUNG-BIASED	LOC102723439
-1.78	-7.39	9.229e-08	3.301e-05	YOUNG-BIASED	B4GALNT4
-1.77	-3.54	0.001577	0.006755	YOUNG-BIASED	OTOGL
-1.76	-5.8	4.585e-06	0.0001439	YOUNG-BIASED	STX19
-1.76	-3.4	0.002266	0.008799	YOUNG-BIASED	MIR3713
-1.74	-5.26	1.853e-05	0.00033	YOUNG-BIASED	LOC101928551
-1.73	-5.09	2.852e-05	0.0004312	YOUNG-BIASED	LOC730159
-1.73	-4.99	3.769e-05	0.0005181	YOUNG-BIASED	AFP
-1.73	-4.01	0.0004749	0.002842	YOUNG-BIASED	ANXA10
-1.73	-3.99	0.0005013	0.002954	YOUNG-BIASED	LOC101927058
-1.73	-3.25	0.003255	0.01153	YOUNG-BIASED	MIR1279
-1.73	-7.44	8.071e-08	3.301e-05	YOUNG-BIASED	GDF1
-1.72	-5.36	1.431e-05	0.0002842	YOUNG-BIASED	SOX1
-1.71	-4.59	0.000107	0.001026	YOUNG-BIASED	ASB14
-1.7	-3.87	0.0006762	0.003664	YOUNG-BIASED	GFRAL
-1.7	-5.34	1.506e-05	0.0002926	YOUNG-BIASED	KLRA1P
-1.69	-6.25	1.492e-06	8.233e-05	YOUNG-BIASED	TCF15
-1.68	-4.13	0.0003458	0.002264	YOUNG-BIASED	CPS1-IT1
-1.68	-4.82	5.892e-05	0.0006918	YOUNG-BIASED	SNORA32
-1.67	-8.21	1.366e-08	1.859e-05	YOUNG-BIASED	FNDC10
-1.66	-4.41	0.0001714	0.001396	YOUNG-BIASED	CRYGS
-1.66	-4.38	0.000184	0.001465	YOUNG-BIASED	LINC01899
-1.65	-4.14	0.0003416	0.002245	YOUNG-BIASED	C4orf17
-1.65	-6.88	3.16e-07	4.42e-05	YOUNG-BIASED	PDE10A
-1.65	-2.65	0.01374	0.03469	YOUNG-BIASED	PMCH
-1.65	-7.06	2.027e-07	3.985e-05	YOUNG-BIASED	LINC01599
-1.64	-5.36	1.433e-05	0.0002842	YOUNG-BIASED	AIRN
-1.64	-4.5	0.0001328	0.001182	YOUNG-BIASED	DKFZP586I1420
-1.64	-6.77	4.087e-07	4.856e-05	YOUNG-BIASED	EN2
-1.64	-7.16	1.605e-07	3.653e-05	YOUNG-BIASED	SCRT1
-1.64	-4.6	0.000102	0.0009945	YOUNG-BIASED	LINC01553
-1.64	-7.66	4.917e-08	3.033e-05	YOUNG-BIASED	TRAF3
-1.64	-7.53	6.652e-08	3.301e-05	YOUNG-BIASED	CASKIN1
-1.64	-4.96	4.049e-05	0.0005389	YOUNG-BIASED	CELSR1
-1.63	-5.19	2.236e-05	0.000374	YOUNG-BIASED	SNORD45B
-1.63	-5.54	8.935e-06	0.0002119	YOUNG-BIASED	C1orf105
-1.63	-4.57	0.0001124	0.001058	YOUNG-BIASED	TMPRSS11BNL
-1.63	-4.78	6.504e-05	0.0007406	YOUNG-BIASED	SOX6
-1.63	-7.24	1.306e-07	3.413e-05	YOUNG-BIASED	DOC2B
-1.62	-6.67	5.207e-07	5.151e-05	YOUNG-BIASED	SEMA3F
-1.62	-5.17	2.362e-05	0.0003875	YOUNG-BIASED	CXCL10
-1.62	-4.27	0.0002439	0.001773	YOUNG-BIASED	MIR16-1
-1.61	-3.62	0.001298	0.005835	YOUNG-BIASED	LOC101929529
-1.61	-5.21	2.138e-05	0.000362	YOUNG-BIASED	PCDHA9
-1.61	-7.98	2.31e-08	2.221e-05	YOUNG-BIASED	KCNH2
-1.61	-7.29	1.173e-07	3.31e-05	YOUNG-BIASED	MIR628
-1.61	-4.36	0.0001944	0.001512	YOUNG-BIASED	SALL3
-1.61	-5.03	3.361e-05	0.0004787	YOUNG-BIASED	MIR125B2
-1.61	-7.4	9.006e-08	3.301e-05	YOUNG-BIASED	MAPK8IP2
-1.6	-3.3	0.002878	0.01051	YOUNG-BIASED	RBMS3-AS1
-1.6	-3.48	0.001835	0.007536	YOUNG-BIASED	KCNQ5-IT1
-1.6	-2.84	0.00872	0.02441	YOUNG-BIASED	MIR133A1
-1.59	-4.71	7.684e-05	0.000823	YOUNG-BIASED	KIAA1107
-1.59	-4.27	0.0002409	0.001756	YOUNG-BIASED	SLCO1B1
-1.59	-7.21	1.402e-07	3.421e-05	YOUNG-BIASED	MEX3D
-1.58	-6.35	1.164e-06	7.248e-05	YOUNG-BIASED	NAT8L
-1.58	-5.64	6.952e-06	0.000186	YOUNG-BIASED	FLT4
-1.58	-7.4	8.995e-08	3.301e-05	YOUNG-BIASED	PTPRN2
-1.58	-8.76	4.064e-09	1.713e-05	YOUNG-BIASED	MIR3621
-1.58	-4.67	8.573e-05	0.0008853	YOUNG-BIASED	MIR6755
-1.57	-4.16	0.0003222	0.002154	YOUNG-BIASED	TFPI
-1.57	-6.59	6.355e-07	5.758e-05	YOUNG-BIASED	CYS1
-1.57	-3.49	0.001802	0.007434	YOUNG-BIASED	FGL1
-1.57	-5.02	3.475e-05	0.0004888	YOUNG-BIASED	LOC100506071
-1.56	-7.47	7.645e-08	3.301e-05	YOUNG-BIASED	EGR4
-1.56	-7.27	1.225e-07	3.386e-05	YOUNG-BIASED	GRIN1
-1.56	-2.64	0.01396	0.03514	YOUNG-BIASED	SNORD113-9
-1.56	-6.87	3.201e-07	4.424e-05	YOUNG-BIASED	GABRB3
-1.56	-6.5	7.977e-07	6.192e-05	YOUNG-BIASED	MIR124-3
-1.56	-5.81	4.524e-06	0.000143	YOUNG-BIASED	PHF21B
-1.55	-3.24	0.003312	0.01168	YOUNG-BIASED	TSHB
-1.55	-3.22	0.003484	0.01212	YOUNG-BIASED	MIR591
-1.55	-4.38	0.0001844	0.001467	YOUNG-BIASED	CTNNA3
-1.55	-4.46	0.0001493	0.001282	YOUNG-BIASED	LOC102724719
-1.55	-7.39	9.246e-08	3.301e-05	YOUNG-BIASED	JAG2
-1.55	-5.89	3.681e-06	0.0001311	YOUNG-BIASED	MIR935
-1.54	-5.12	2.703e-05	0.0004171	YOUNG-BIASED	NKX6-2
-1.54	-4.95	4.146e-05	0.0005468	YOUNG-BIASED	ATP2B1
-1.54	-5.25	1.894e-05	0.0003333	YOUNG-BIASED	KIF26A
-1.54	-5.82	4.436e-06	0.0001423	YOUNG-BIASED	LOC339593
-1.53	-3.88	0.0006679	0.003636	YOUNG-BIASED	MIRLET7A1
-1.53	-6.95	2.622e-07	4.136e-05	YOUNG-BIASED	GPSM1
-1.53	-5.47	1.083e-05	0.000238	YOUNG-BIASED	ANGPTL5
-1.52	-5.86	3.988e-06	0.0001354	YOUNG-BIASED	FGFR3
-1.52	-6.98	2.475e-07	4.134e-05	YOUNG-BIASED	CRMP1
-1.52	-4.51	0.0001295	0.001162	YOUNG-BIASED	GNGT1
-1.52	-4.36	0.000194	0.001511	YOUNG-BIASED	SNORA25
-1.52	-6.4	1.03e-06	6.861e-05	YOUNG-BIASED	CELF5
-1.52	-6.36	1.134e-06	7.165e-05	YOUNG-BIASED	FAM19A5
-1.51	-6.7	4.899e-07	5.059e-05	YOUNG-BIASED	FAM131B
-1.51	-7.04	2.121e-07	3.988e-05	YOUNG-BIASED	KBTBD11
-1.51	-5.3	1.676e-05	0.000311	YOUNG-BIASED	CPNE7
-1.51	-7.02	2.218e-07	3.996e-05	YOUNG-BIASED	NDRG4
-1.51	-3.03	0.005589	0.01732	YOUNG-BIASED	ARHGAP28
-1.5	-4.38	0.0001834	0.001461	YOUNG-BIASED	CPNE4
-1.5	-3.18	0.003913	0.01321	YOUNG-BIASED	MIR563
-1.5	-3.84	0.0007376	0.003903	YOUNG-BIASED	YIPF7
-1.5	-3.63	0.001266	0.005731	YOUNG-BIASED	AMTN
-1.5	-5.26	1.839e-05	0.0003298	YOUNG-BIASED	UNCX
-1.5	-8.56	6.248e-09	1.713e-05	YOUNG-BIASED	NPDC1
-1.5	-6.47	8.691e-07	6.363e-05	YOUNG-BIASED	RET
-1.5	-3.78	0.000868	0.004369	YOUNG-BIASED	MIR4490
-1.5	-7.29	1.162e-07	3.31e-05	YOUNG-BIASED	PDE9A
-1.5	-7.47	7.665e-08	3.301e-05	YOUNG-BIASED	SHANK3
-1.49	-4.4	0.000174	0.001409	YOUNG-BIASED	TNFAIP6
-1.49	-5.93	3.35e-06	0.0001245	YOUNG-BIASED	PRR35
-1.49	-6.76	4.248e-07	4.935e-05	YOUNG-BIASED	NPTXR
-1.48	-3.84	0.0007324	0.003884	YOUNG-BIASED	MIR128-1
-1.48	-6.73	4.469e-07	4.967e-05	YOUNG-BIASED	DKFZP434A062
-1.48	-3.96	0.0005365	0.003102	YOUNG-BIASED	SNORA8
-1.48	-4.78	6.41e-05	0.0007327	YOUNG-BIASED	OLR1
-1.48	-6.9	2.959e-07	4.332e-05	YOUNG-BIASED	CERS1
-1.47	-6.4	1.031e-06	6.861e-05	YOUNG-BIASED	GABRD
-1.47	-5.44	1.167e-05	0.0002486	YOUNG-BIASED	RASGRP3
-1.47	-3.19	0.003767	0.01284	YOUNG-BIASED	MIR944
-1.47	-7.48	7.477e-08	3.301e-05	YOUNG-BIASED	WNK2
-1.47	-5.25	1.924e-05	0.0003371	YOUNG-BIASED	LMF1
-1.47	-6.53	7.31e-07	6.042e-05	YOUNG-BIASED	SHC2
-1.47	-6.23	1.552e-06	8.409e-05	YOUNG-BIASED	SOX18
-1.46	-6.58	6.475e-07	5.789e-05	YOUNG-BIASED	SHISA8
-1.45	-3.23	0.003408	0.01193	YOUNG-BIASED	MNDA
-1.45	-3.12	0.004501	0.01469	YOUNG-BIASED	RGS21
-1.45	-4.9	4.708e-05	0.000597	YOUNG-BIASED	HAGLROS
-1.45	-5.35	1.463e-05	0.0002874	YOUNG-BIASED	CHD1
-1.45	-7.31	1.1e-07	3.301e-05	YOUNG-BIASED	N4BP3
-1.45	-5.08	2.988e-05	0.0004441	YOUNG-BIASED	SOX17
-1.45	-3.96	0.0005471	0.003138	YOUNG-BIASED	LINC01619
-1.45	-5.05	3.181e-05	0.0004615	YOUNG-BIASED	LINC01915
-1.44	-4.58	0.0001083	0.001034	YOUNG-BIASED	CRIPAK
-1.44	-4.12	0.0003575	0.00232	YOUNG-BIASED	MIR580
-1.44	-5.94	3.263e-06	0.0001229	YOUNG-BIASED	MNX1
-1.44	-4.31	0.0002203	0.001652	YOUNG-BIASED	LOC100132781
-1.44	-5.34	1.528e-05	0.0002952	YOUNG-BIASED	GATA3
-1.44	-4.84	5.597e-05	0.0006695	YOUNG-BIASED	HIF1A-AS2
-1.44	-7.44	8.077e-08	3.301e-05	YOUNG-BIASED	ACE
-1.44	-2.54	0.01743	0.04188	YOUNG-BIASED	LINC01722
-1.44	-7.13	1.707e-07	3.676e-05	YOUNG-BIASED	HRH3
-1.43	-3.95	0.000563	0.003208	YOUNG-BIASED	SMR3B
-1.43	-4.51	0.0001316	0.001177	YOUNG-BIASED	EYS
-1.43	-5.46	1.121e-05	0.0002427	YOUNG-BIASED	LINC01277
-1.43	-5.66	6.603e-06	0.0001801	YOUNG-BIASED	SSMEM1
-1.43	-3.47	0.001877	0.007659	YOUNG-BIASED	OGN
-1.43	-7.07	1.98e-07	3.985e-05	YOUNG-BIASED	MCF2L
-1.43	-6.64	5.707e-07	5.514e-05	YOUNG-BIASED	FAM171A2
-1.42	-3.15	0.004215	0.01399	YOUNG-BIASED	DIRC1
-1.42	-7.37	9.72e-08	3.301e-05	YOUNG-BIASED	GPRIN1
-1.42	-6.66	5.385e-07	5.269e-05	YOUNG-BIASED	NRN1
-1.42	-5.42	1.216e-05	0.0002558	YOUNG-BIASED	GATA3-AS1
-1.42	-4.22	0.0002773	0.001935	YOUNG-BIASED	SNORD98
-1.42	-5.91	3.512e-06	0.0001275	YOUNG-BIASED	MED4-AS1
-1.42	-5.02	3.468e-05	0.0004883	YOUNG-BIASED	SOX8
-1.42	-5.84	4.202e-06	0.000138	YOUNG-BIASED	MEP1B
-1.41	-4.2	0.0002882	0.001989	YOUNG-BIASED	ACKR4
-1.41	-6.46	8.902e-07	6.364e-05	YOUNG-BIASED	ANK1
-1.41	-3.9	0.0006397	0.00352	YOUNG-BIASED	LURAP1L-AS1
-1.41	-3.95	0.0005554	0.003173	YOUNG-BIASED	CLECL1
-1.41	-7.22	1.366e-07	3.413e-05	YOUNG-BIASED	SYT3
-1.4	-2.92	0.007351	0.02145	YOUNG-BIASED	PTPRC
-1.4	-4.53	0.0001254	0.001135	YOUNG-BIASED	NR5A2
-1.4	-4.81	5.987e-05	0.0006982	YOUNG-BIASED	GS1-279B7.1
-1.4	-4.05	0.0004358	0.002678	YOUNG-BIASED	MIR3688-1
-1.4	-6.37	1.111e-06	7.156e-05	YOUNG-BIASED	PTGDS
-1.4	-7.22	1.364e-07	3.413e-05	YOUNG-BIASED	DIP2C
-1.4	-3.93	0.0005919	0.003316	YOUNG-BIASED	TUBAL3
-1.4	-6.89	3.074e-07	4.382e-05	YOUNG-BIASED	MTA1
-1.4	-5.99	2.84e-06	0.0001141	YOUNG-BIASED	BEAN1
-1.4	-7.19	1.496e-07	3.555e-05	YOUNG-BIASED	ADAM11
-1.4	-7.31	1.107e-07	3.301e-05	YOUNG-BIASED	GPS1
-1.4	-5.39	1.316e-05	0.0002674	YOUNG-BIASED	ZNF818P
-1.39	-7.45	7.985e-08	3.301e-05	YOUNG-BIASED	TMEM240
-1.39	-6.14	1.957e-06	9.539e-05	YOUNG-BIASED	SEMA3F-AS1
-1.39	-3.38	0.002359	0.009062	YOUNG-BIASED	IMPG2
-1.39	-3.46	0.001924	0.007798	YOUNG-BIASED	MIR4803
-1.39	-3.5	0.001745	0.007266	YOUNG-BIASED	LOC644285
-1.39	-5.84	4.182e-06	0.0001378	YOUNG-BIASED	MNX1-AS1
-1.39	-6.72	4.627e-07	5.008e-05	YOUNG-BIASED	LOC101928058
-1.39	-8.4	8.855e-09	1.713e-05	YOUNG-BIASED	LRRC26
-1.39	-6.68	5.171e-07	5.151e-05	YOUNG-BIASED	RASGEF1A
-1.39	-5.12	2.695e-05	0.0004167	YOUNG-BIASED	MIR548AR
-1.39	-6.32	1.233e-06	7.454e-05	YOUNG-BIASED	EML1
-1.39	-6.47	8.482e-07	6.268e-05	YOUNG-BIASED	AGPAT3
-1.38	-5.35	1.472e-05	0.0002884	YOUNG-BIASED	BRE
-1.38	-5.72	5.76e-06	0.0001651	YOUNG-BIASED	GBX2
-1.38	-3.89	0.0006539	0.003573	YOUNG-BIASED	LOC100506122
-1.38	-3.35	0.002566	0.009652	YOUNG-BIASED	ENAM
-1.38	-8.34	1.032e-08	1.859e-05	YOUNG-BIASED	ADCY1
-1.38	-6.1	2.178e-06	0.000101	YOUNG-BIASED	NCS1
-1.38	-4.63	9.658e-05	0.0009596	YOUNG-BIASED	IGF2-AS
-1.38	-6.86	3.321e-07	4.481e-05	YOUNG-BIASED	LOC100507437
-1.38	-6.12	2.048e-06	9.68e-05	YOUNG-BIASED	GRIN2C
-1.38	-3.78	0.000868	0.004369	YOUNG-BIASED	MIR4528
-1.38	-7.58	5.806e-08	3.231e-05	YOUNG-BIASED	ZNF135
-1.38	-4.58	0.0001092	0.001037	YOUNG-BIASED	CDH4
-1.37	-5.3	1.674e-05	0.000311	YOUNG-BIASED	WNT4
-1.37	-4.6	0.0001032	0.001002	YOUNG-BIASED	NKD2
-1.37	-4.99	3.731e-05	0.000515	YOUNG-BIASED	HLA-DOB
-1.37	-4.55	0.0001173	0.00109	YOUNG-BIASED	RHAG
-1.37	-7.24	1.319e-07	3.413e-05	YOUNG-BIASED	NRARP
-1.37	-5.39	1.312e-05	0.0002668	YOUNG-BIASED	KCNQ1
-1.37	-6.47	8.519e-07	6.271e-05	YOUNG-BIASED	AKT1
-1.37	-7.14	1.684e-07	3.676e-05	YOUNG-BIASED	RFNG
-1.37	-5.32	1.605e-05	0.0003037	YOUNG-BIASED	EFNA2
-1.37	-6.28	1.365e-06	7.865e-05	YOUNG-BIASED	DPF1
-1.36	-6.8	3.854e-07	4.75e-05	YOUNG-BIASED	LRRN2
-1.36	-6.39	1.047e-06	6.882e-05	YOUNG-BIASED	ADD2
-1.36	-7.32	1.097e-07	3.301e-05	YOUNG-BIASED	MELTF-AS1
-1.36	-3.72	0.001008	0.004856	YOUNG-BIASED	ASIC5
-1.36	-3.49	0.001792	0.007404	YOUNG-BIASED	SNORA1
-1.36	-4.97	3.912e-05	0.0005304	YOUNG-BIASED	LOC105369971
-1.36	-6.16	1.854e-06	9.268e-05	YOUNG-BIASED	CBLN1
-1.35	-3.54	0.001578	0.006759	YOUNG-BIASED	TNFSF18
-1.35	-3.75	0.0009345	0.004587	YOUNG-BIASED	AJAP1
-1.35	-4.66	8.851e-05	0.0009044	YOUNG-BIASED	HMX1
-1.35	-4.64	9.324e-05	0.00094	YOUNG-BIASED	LMX1B
-1.35	-7.07	1.977e-07	3.985e-05	YOUNG-BIASED	BARHL1
-1.35	-4.51	0.0001314	0.001176	YOUNG-BIASED	SNORA19
-1.35	-5.25	1.909e-05	0.0003349	YOUNG-BIASED	OVOL1
-1.35	-7.34	1.04e-07	3.301e-05	YOUNG-BIASED	TMEM145
-1.34	-6.88	3.162e-07	4.42e-05	YOUNG-BIASED	ZNF853
-1.34	-5.29	1.723e-05	0.0003164	YOUNG-BIASED	PGGHG
-1.34	-6.75	4.349e-07	4.954e-05	YOUNG-BIASED	MGAT5B
-1.34	-6.49	8.095e-07	6.212e-05	YOUNG-BIASED	DIRAS1
-1.34	-7.31	1.118e-07	3.301e-05	YOUNG-BIASED	ZSCAN1
-1.33	-5.62	7.425e-06	0.0001901	YOUNG-BIASED	LHX4
-1.33	-4.53	0.0001248	0.001133	YOUNG-BIASED	MIR4742
-1.33	-5.64	7.027e-06	0.0001864	YOUNG-BIASED	ADRA2B
-1.33	-7.37	9.655e-08	3.301e-05	YOUNG-BIASED	SFMBT1
-1.33	-6.99	2.406e-07	4.073e-05	YOUNG-BIASED	ZNF316
-1.33	-4.58	0.0001091	0.001037	YOUNG-BIASED	GPR85
-1.33	-4.68	8.475e-05	0.0008801	YOUNG-BIASED	IDO1
-1.33	-4.85	5.324e-05	0.0006465	YOUNG-BIASED	BARX1-AS1
-1.33	-6.67	5.294e-07	5.215e-05	YOUNG-BIASED	TMEM121
-1.33	-5.93	3.35e-06	0.0001245	YOUNG-BIASED	ARHGDIG
-1.33	-3.04	0.005485	0.01707	YOUNG-BIASED	ASPA
-1.33	-6.7	4.817e-07	5.057e-05	YOUNG-BIASED	DUS1L
-1.33	-4.23	0.0002667	0.001885	YOUNG-BIASED	LOC105372069
-1.33	-6.11	2.111e-06	9.894e-05	YOUNG-BIASED	ZNF358
-1.32	-4.5	0.0001351	0.001197	YOUNG-BIASED	LOC101927854
-1.32	-7.17	1.568e-07	3.636e-05	YOUNG-BIASED	VWA5B2
-1.32	-5.13	2.634e-05	0.000412	YOUNG-BIASED	SOX7
-1.32	-4.75	7.048e-05	0.0007815	YOUNG-BIASED	BARX1
-1.32	-7.08	1.908e-07	3.946e-05	YOUNG-BIASED	LOC100129697
-1.32	-5.96	3.051e-06	0.0001192	YOUNG-BIASED	MIR2909
-1.32	-5.11	2.744e-05	0.0004213	YOUNG-BIASED	C2CD4C
-1.32	-5.93	3.365e-06	0.0001249	YOUNG-BIASED	KCNJ4
-1.31	-6.71	4.694e-07	5.008e-05	YOUNG-BIASED	ADAM23
-1.31	-5.87	3.845e-06	0.0001329	YOUNG-BIASED	MSX1
-1.31	-4.69	8.263e-05	0.0008652	YOUNG-BIASED	LOC101927822
-1.31	-3.16	0.004092	0.01366	YOUNG-BIASED	RNASE9
-1.31	-5.26	1.84e-05	0.0003298	YOUNG-BIASED	HBM
-1.31	-5.02	3.423e-05	0.0004841	YOUNG-BIASED	GRIN3B
-1.31	-6.95	2.657e-07	4.136e-05	YOUNG-BIASED	MAPK12
-1.3	-6.85	3.341e-07	4.481e-05	YOUNG-BIASED	VWA1
-1.3	-5.86	4.006e-06	0.0001358	YOUNG-BIASED	KIAA1522
-1.3	-5.14	2.555e-05	0.0004043	YOUNG-BIASED	LOC101927787
-1.3	-6.85	3.342e-07	4.481e-05	YOUNG-BIASED	ADCY3
-1.3	-5.25	1.895e-05	0.0003333	YOUNG-BIASED	PPP2R2C
-1.3	-6.2	1.67e-06	8.786e-05	YOUNG-BIASED	NACC2
-1.3	-6.74	4.394e-07	4.954e-05	YOUNG-BIASED	FAM171A1
-1.3	-6.27	1.399e-06	7.952e-05	YOUNG-BIASED	CRTAC1
-1.3	-5.82	4.438e-06	0.0001423	YOUNG-BIASED	FBXL16
-1.3	-5.79	4.721e-06	0.0001465	YOUNG-BIASED	CACNG4
-1.3	-6.53	7.436e-07	6.042e-05	YOUNG-BIASED	STAC2
-1.3	-6.31	1.27e-06	7.564e-05	YOUNG-BIASED	AATK-AS1
-1.3	-6.4	1.028e-06	6.861e-05	YOUNG-BIASED	LRRC4B
-1.29	-4.46	0.0001492	0.001282	YOUNG-BIASED	SPHAR
-1.29	-3.51	0.001701	0.00713	YOUNG-BIASED	ITGB6
-1.29	-3.3	0.00288	0.01051	YOUNG-BIASED	MIR548F2
-1.29	-4.62	9.698e-05	0.0009623	YOUNG-BIASED	SLC12A7
-1.29	-6.14	1.98e-06	9.56e-05	YOUNG-BIASED	VWC2
-1.29	-3.94	0.0005777	0.003268	YOUNG-BIASED	AKR1C3
-1.29	-3.72	0.001007	0.004853	YOUNG-BIASED	MIR8054
-1.29	-7.34	1.046e-07	3.301e-05	YOUNG-BIASED	MCF2L-AS1
-1.29	-5.36	1.438e-05	0.0002842	YOUNG-BIASED	CRAMP1
-1.29	-6.74	4.416e-07	4.954e-05	YOUNG-BIASED	KLHL36
-1.29	-4.96	4.019e-05	0.0005367	YOUNG-BIASED	TBX2
-1.29	-6.48	8.29e-07	6.268e-05	YOUNG-BIASED	AATK
-1.29	-6.15	1.919e-06	9.468e-05	YOUNG-BIASED	ELAVL3
-1.29	-6.73	4.49e-07	4.967e-05	YOUNG-BIASED	WTIP
-1.29	-5.05	3.174e-05	0.000461	YOUNG-BIASED	IL11
-1.29	-7.52	6.74e-08	3.301e-05	YOUNG-BIASED	XKR7
-1.29	-6.31	1.273e-06	7.564e-05	YOUNG-BIASED	RASL10A
-1.28	-6.87	3.2e-07	4.424e-05	YOUNG-BIASED	ZBTB8A
-1.28	-5.48	1.052e-05	0.0002342	YOUNG-BIASED	TRIM67
-1.28	-6.02	2.678e-06	0.0001116	YOUNG-BIASED	DVL1
-1.28	-6.62	5.887e-07	5.552e-05	YOUNG-BIASED	HES5
-1.28	-6.53	7.357e-07	6.042e-05	YOUNG-BIASED	B4GALT2
-1.28	-6.67	5.196e-07	5.151e-05	YOUNG-BIASED	CELSR2
-1.28	-6.36	1.123e-06	7.158e-05	YOUNG-BIASED	WNT9A
-1.28	-6.86	3.276e-07	4.481e-05	YOUNG-BIASED	SLC4A3
-1.28	-6.83	3.499e-07	4.557e-05	YOUNG-BIASED	PODXL2
-1.28	-6.27	1.413e-06	7.967e-05	YOUNG-BIASED	SRSF12
-1.28	-6.79	3.858e-07	4.75e-05	YOUNG-BIASED	PRKAR2B
-1.28	-4.74	7.168e-05	0.000789	YOUNG-BIASED	TBX2-AS1
-1.28	-7.14	1.688e-07	3.676e-05	YOUNG-BIASED	HID1
-1.28	-6.48	8.434e-07	6.268e-05	YOUNG-BIASED	CELF4
-1.28	-4.02	0.0004641	0.002801	YOUNG-BIASED	ONECUT3
-1.28	-5.08	2.998e-05	0.0004447	YOUNG-BIASED	VSTM2B
-1.28	-5.32	1.598e-05	0.0003024	YOUNG-BIASED	SHISA7
-1.28	-6.53	7.311e-07	6.042e-05	YOUNG-BIASED	TAF4
-1.27	-3.14	0.004303	0.0142	YOUNG-BIASED	LINC01781
-1.27	-7.34	1.024e-07	3.301e-05	YOUNG-BIASED	CCDC71
-1.27	-4.57	0.0001112	0.001051	YOUNG-BIASED	PCDHB19P
-1.27	-6.29	1.337e-06	7.774e-05	YOUNG-BIASED	DBN1
-1.27	-6.36	1.126e-06	7.158e-05	YOUNG-BIASED	TMEM181
-1.27	-4.6	0.000103	0.001001	YOUNG-BIASED	GRID1
-1.27	-4.7	7.979e-05	0.0008457	YOUNG-BIASED	ADAMTS14
-1.27	-5.71	5.894e-06	0.0001677	YOUNG-BIASED	TTC7B
-1.27	-4.9	4.755e-05	0.0006004	YOUNG-BIASED	BUB1B-PAK6
-1.27	-6.08	2.297e-06	0.0001036	YOUNG-BIASED	NHLRC4
-1.27	-7.74	4.007e-08	2.818e-05	YOUNG-BIASED	SLC19A1
-1.26	-6.84	3.418e-07	4.539e-05	YOUNG-BIASED	RIIAD1
-1.26	-4.12	0.0003604	0.002334	YOUNG-BIASED	LINC01338
-1.26	-7.17	1.57e-07	3.636e-05	YOUNG-BIASED	PHF2
-1.26	-6.96	2.576e-07	4.136e-05	YOUNG-BIASED	ATP1A3
-1.25	-7.07	1.96e-07	3.985e-05	YOUNG-BIASED	MANEAL
-1.25	-6.53	7.395e-07	6.042e-05	YOUNG-BIASED	RNF144A
-1.25	-3.39	0.002292	0.008859	YOUNG-BIASED	SAMD7
-1.25	-3.31	0.002841	0.01041	YOUNG-BIASED	PEX5L-AS2
-1.25	-6.83	3.576e-07	4.581e-05	YOUNG-BIASED	RANBP17
-1.25	-5.58	8.237e-06	0.0002021	YOUNG-BIASED	FOXF2
-1.25	-7.55	6.25e-08	3.301e-05	YOUNG-BIASED	LOC100133669
-1.25	-7.51	6.904e-08	3.301e-05	YOUNG-BIASED	LY6E
-1.25	-3.64	0.001229	0.005613	YOUNG-BIASED	MIRLET7F1
-1.25	-4.94	4.25e-05	0.0005566	YOUNG-BIASED	CLEC2D
-1.25	-6.71	4.752e-07	5.008e-05	YOUNG-BIASED	FZD10-AS1
-1.25	-6.48	8.412e-07	6.268e-05	YOUNG-BIASED	GAS6-AS2
-1.25	-5.33	1.538e-05	0.0002959	YOUNG-BIASED	KREMEN2
-1.25	-6.52	7.505e-07	6.042e-05	YOUNG-BIASED	MAST1
-1.25	-5.94	3.254e-06	0.0001229	YOUNG-BIASED	CHST8
-1.25	-4.12	0.0003576	0.00232	YOUNG-BIASED	PLPP2
-1.25	-6.43	9.443e-07	6.542e-05	YOUNG-BIASED	SLC2A4RG
-1.24	-6.3	1.318e-06	7.714e-05	YOUNG-BIASED	VANGL2
-1.24	-5	3.614e-05	0.0005036	YOUNG-BIASED	GAREM2
-1.24	-3.85	0.0007108	0.003805	YOUNG-BIASED	MIR3607
-1.24	-6.26	1.463e-06	8.14e-05	YOUNG-BIASED	COL11A2
-1.24	-6.16	1.849e-06	9.258e-05	YOUNG-BIASED	ADCYAP1R1
-1.24	-2.86	0.008363	0.02364	YOUNG-BIASED	LINC01608
-1.24	-2.79	0.009847	0.02678	YOUNG-BIASED	LOC105369893
-1.24	-4.44	0.000158	0.001331	YOUNG-BIASED	MIR759
-1.24	-5.96	3.066e-06	0.0001192	YOUNG-BIASED	ZIC5
-1.24	-7.24	1.302e-07	3.413e-05	YOUNG-BIASED	TYRO3
-1.24	-5.62	7.384e-06	0.0001901	YOUNG-BIASED	MIR627
-1.24	-5.95	3.184e-06	0.0001212	YOUNG-BIASED	WSCD1
-1.24	-6.77	4.116e-07	4.869e-05	YOUNG-BIASED	B4GALT6
-1.24	-6.19	1.714e-06	8.902e-05	YOUNG-BIASED	FSD1
-1.24	-6.81	3.691e-07	4.651e-05	YOUNG-BIASED	NR2F6
-1.24	-5.31	1.635e-05	0.0003063	YOUNG-BIASED	INSM1
-1.23	-5.3	1.691e-05	0.0003127	YOUNG-BIASED	ALS2CR12
-1.23	-6.52	7.561e-07	6.042e-05	YOUNG-BIASED	CAMK2N2
-1.23	-5.41	1.249e-05	0.0002594	YOUNG-BIASED	PCDHGA8
-1.23	-3.59	0.001398	0.006182	YOUNG-BIASED	SNORD87
-1.23	-6.15	1.902e-06	9.402e-05	YOUNG-BIASED	MVB12B
-1.23	-4.86	5.238e-05	0.0006397	YOUNG-BIASED	LHX3
-1.23	-6.75	4.286e-07	4.941e-05	YOUNG-BIASED	SCN4B
-1.23	-6.59	6.429e-07	5.767e-05	YOUNG-BIASED	GAS6
-1.23	-4.28	0.0002398	0.00175	YOUNG-BIASED	DIO3
-1.23	-6.73	4.547e-07	4.967e-05	YOUNG-BIASED	HDGFRP3
-1.23	-3.16	0.004034	0.01351	YOUNG-BIASED	LINC01028
-1.23	-6.29	1.341e-06	7.776e-05	YOUNG-BIASED	NPTX1
-1.23	-5.91	3.48e-06	0.0001269	YOUNG-BIASED	NFIC
-1.23	-6.89	3.071e-07	4.382e-05	YOUNG-BIASED	LRFN3
-1.23	-4.98	3.842e-05	0.0005246	YOUNG-BIASED	C2CD2
-1.23	-5.31	1.629e-05	0.000306	YOUNG-BIASED	FAM83F
-1.22	-2.71	0.01198	0.03124	YOUNG-BIASED	SCARNA18
-1.22	-3.98	0.0005153	0.003018	YOUNG-BIASED	ENPP3
-1.22	-6.24	1.529e-06	8.356e-05	YOUNG-BIASED	URGCP-MRPS24
-1.22	-4.36	0.0001952	0.001518	YOUNG-BIASED	SAMD9
-1.22	-3.27	0.00313	0.0112	YOUNG-BIASED	PNLIPRP3
-1.22	-6.33	1.203e-06	7.388e-05	YOUNG-BIASED	DPYSL4
-1.22	-6.48	8.447e-07	6.268e-05	YOUNG-BIASED	CBX2
-1.22	-6.82	3.585e-07	4.581e-05	YOUNG-BIASED	NOVA2
-1.22	-7.37	9.593e-08	3.301e-05	YOUNG-BIASED	DNMT3B
-1.21	-7.81	3.396e-08	2.628e-05	YOUNG-BIASED	CHRNB2
-1.21	-4.01	0.000482	0.002872	YOUNG-BIASED	EGLN1
-1.21	-5.58	8.168e-06	0.0002012	YOUNG-BIASED	KCNK12
-1.21	-4.99	3.75e-05	0.0005161	YOUNG-BIASED	CYP26B1
-1.21	-3.63	0.001245	0.005666	YOUNG-BIASED	KCNJ13
-1.21	-3.41	0.002172	0.008537	YOUNG-BIASED	LSAMP-AS1
-1.21	-4.74	7.263e-05	0.0007954	YOUNG-BIASED	MIR6720
-1.21	-5.43	1.207e-05	0.0002547	YOUNG-BIASED	HLA-DQB1
-1.21	-3.22	0.003524	0.01224	YOUNG-BIASED	MIR548AZ
-1.21	-6.87	3.235e-07	4.449e-05	YOUNG-BIASED	CCDC183-AS1
-1.21	-6.31	1.279e-06	7.584e-05	YOUNG-BIASED	KNDC1
-1.21	-4.38	0.0001841	0.001466	YOUNG-BIASED	LOC105378330
-1.21	-7.38	9.386e-08	3.301e-05	YOUNG-BIASED	TMEM132A
-1.21	-5.58	8.088e-06	0.0001999	YOUNG-BIASED	CACNA1C
-1.21	-3.68	0.001115	0.005244	YOUNG-BIASED	MIR4501
-1.21	-6.19	1.733e-06	8.926e-05	YOUNG-BIASED	IGDCC3
-1.21	-6.6	6.248e-07	5.699e-05	YOUNG-BIASED	MIR9-3HG
-1.21	-5.8	4.686e-06	0.0001457	YOUNG-BIASED	JPH3
-1.21	-7.14	1.658e-07	3.676e-05	YOUNG-BIASED	MPP3
-1.2	-6.19	1.717e-06	8.902e-05	YOUNG-BIASED	KLHL17
-1.2	-3.59	0.001409	0.006213	YOUNG-BIASED	PDC
-1.2	-5.52	9.584e-06	0.0002208	YOUNG-BIASED	KIF1A
-1.2	-3.18	0.003895	0.01317	YOUNG-BIASED	SULT1E1
-1.2	-6.46	8.903e-07	6.364e-05	YOUNG-BIASED	SNCB
-1.2	-4.97	3.975e-05	0.0005336	YOUNG-BIASED	MMP10
-1.2	-5.03	3.334e-05	0.0004759	YOUNG-BIASED	MSI1
-1.2	-3.78	0.00086	0.004342	YOUNG-BIASED	MIR5006
-1.2	-3.83	0.0007626	0.004001	YOUNG-BIASED	ADAM20P1
-1.2	-6.44	9.277e-07	6.477e-05	YOUNG-BIASED	ZNF710
-1.2	-4.04	0.0004454	0.002722	YOUNG-BIASED	C15orf59
-1.2	-5.47	1.071e-05	0.0002369	YOUNG-BIASED	ADAMTS7
-1.2	-6.62	5.879e-07	5.552e-05	YOUNG-BIASED	LOC729652
-1.2	-4.83	5.619e-05	0.0006706	YOUNG-BIASED	CRLF1
-1.2	-6.95	2.622e-07	4.136e-05	YOUNG-BIASED	MARK4
-1.2	-6.5	8.045e-07	6.212e-05	YOUNG-BIASED	MIR3195
-1.2	-6.06	2.393e-06	0.0001056	YOUNG-BIASED	LAMA5
-1.2	-7.43	8.273e-08	3.301e-05	YOUNG-BIASED	SYNGR1
-1.2	-6.88	3.117e-07	4.42e-05	YOUNG-BIASED	MAPK11
-1.19	-3.11	0.004591	0.0149	YOUNG-BIASED	SPTA1
-1.19	-4.16	0.0003219	0.002154	YOUNG-BIASED	NHLH2
-1.19	-7.06	2.007e-07	3.985e-05	YOUNG-BIASED	CACNA2D2
-1.19	-2.83	0.009013	0.02503	YOUNG-BIASED	SMR3A
-1.19	-6.55	7.082e-07	6.042e-05	YOUNG-BIASED	MGAT4B
-1.19	-3.61	0.001319	0.005909	YOUNG-BIASED	MIR1302-6
-1.19	-5.88	3.799e-06	0.0001325	YOUNG-BIASED	GFRA2
-1.19	-3.39	0.002317	0.008936	YOUNG-BIASED	LINC01241
-1.19	-5.3	1.657e-05	0.0003088	YOUNG-BIASED	AIF1L
-1.19	-4.85	5.412e-05	0.0006516	YOUNG-BIASED	AQP5
-1.19	-5.95	3.193e-06	0.0001213	YOUNG-BIASED	FZD10
-1.19	-5.77	4.969e-06	0.0001505	YOUNG-BIASED	NUDT14
-1.19	-6.76	4.182e-07	4.883e-05	YOUNG-BIASED	CSNK2A2
-1.19	-4.97	3.906e-05	0.0005303	YOUNG-BIASED	FLJ16779
-1.19	-7.03	2.179e-07	3.988e-05	YOUNG-BIASED	BID
-1.18	-4.7	7.977e-05	0.0008457	YOUNG-BIASED	HES2
-1.18	-6.3	1.298e-06	7.653e-05	YOUNG-BIASED	EIF4E1B
-1.18	-3.99	0.0004962	0.002935	YOUNG-BIASED	ERICH1-AS1
-1.18	-7.03	2.152e-07	3.988e-05	YOUNG-BIASED	FBXL6
-1.18	-4.89	4.798e-05	0.0006048	YOUNG-BIASED	FIBCD1
-1.18	-6.83	3.546e-07	4.581e-05	YOUNG-BIASED	GOLGA7B
-1.18	-5.12	2.685e-05	0.0004166	YOUNG-BIASED	EBF3
-1.18	-7.65	5.039e-08	3.033e-05	YOUNG-BIASED	FBXL15
-1.18	-6.67	5.21e-07	5.151e-05	YOUNG-BIASED	NRXN2
-1.18	-7.99	2.25e-08	2.221e-05	YOUNG-BIASED	TFDP1
-1.18	-3.2	0.003715	0.01271	YOUNG-BIASED	SNORD114-18
-1.18	-7.03	2.197e-07	3.995e-05	YOUNG-BIASED	AP3B2
-1.18	-6.08	2.264e-06	0.0001025	YOUNG-BIASED	ACSF3
-1.18	-4.41	0.0001705	0.001392	YOUNG-BIASED	PLPPR3
-1.17	-4.36	0.0001921	0.001503	YOUNG-BIASED	MMP23B
-1.17	-5.1	2.845e-05	0.0004306	YOUNG-BIASED	LOC101060391
-1.17	-2.94	0.007	0.02061	YOUNG-BIASED	GRM7-AS2
-1.17	-5.78	4.929e-06	0.0001502	YOUNG-BIASED	SOWAHA
-1.17	-7.16	1.603e-07	3.653e-05	YOUNG-BIASED	PRKAR1B
-1.17	-5.81	4.568e-06	0.0001439	YOUNG-BIASED	NACAD
-1.17	-7.01	2.273e-07	3.998e-05	YOUNG-BIASED	SLC52A2
-1.17	-7.24	1.325e-07	3.413e-05	YOUNG-BIASED	MIR4488
-1.17	-7.22	1.364e-07	3.413e-05	YOUNG-BIASED	LRRC10B
-1.17	-7.25	1.269e-07	3.413e-05	YOUNG-BIASED	P3H3
-1.17	-4.37	0.0001858	0.001473	YOUNG-BIASED	SNORD108
-1.17	-6.61	6.091e-07	5.593e-05	YOUNG-BIASED	FAM173A
-1.17	-5.57	8.37e-06	0.0002035	YOUNG-BIASED	RHBDL3
-1.17	-5.57	8.339e-06	0.000203	YOUNG-BIASED	COX6B2
-1.17	-5.02	3.444e-05	0.0004859	YOUNG-BIASED	SCARF2
-1.16	-6.95	2.63e-07	4.136e-05	YOUNG-BIASED	YEATS2
-1.16	-3.7	0.001061	0.005044	YOUNG-BIASED	LOC101928885
-1.16	-5.16	2.403e-05	0.0003908	YOUNG-BIASED	C5orf66
-1.16	-2.78	0.01021	0.02749	YOUNG-BIASED	LINC02115
-1.16	-6.42	9.646e-07	6.618e-05	YOUNG-BIASED	SQSTM1
-1.16	-4.53	0.0001228	0.001123	YOUNG-BIASED	PIK3CG
-1.16	-6.54	7.132e-07	6.042e-05	YOUNG-BIASED	HIP1R
-1.16	-5.67	6.385e-06	0.0001761	YOUNG-BIASED	THCAT155
-1.16	-4.29	0.0002287	0.001692	YOUNG-BIASED	MIR1247
-1.16	-6.61	6.114e-07	5.595e-05	YOUNG-BIASED	SBK1
-1.16	-4.43	0.0001589	0.001336	YOUNG-BIASED	BAIAP3
-1.16	-4.72	7.568e-05	0.0008166	YOUNG-BIASED	LOC102723471
-1.16	-4.83	5.614e-05	0.0006706	YOUNG-BIASED	LOC284395
-1.16	-5.97	2.992e-06	0.0001179	YOUNG-BIASED	R3HDM4
-1.16	-6.68	5.098e-07	5.151e-05	YOUNG-BIASED	PFKL
-1.16	-6.11	2.136e-06	9.994e-05	YOUNG-BIASED	SEPT3
-1.15	-2.77	0.0103	0.02769	YOUNG-BIASED	LEMD1
-1.15	-4.87	5.119e-05	0.0006315	YOUNG-BIASED	ESPN
-1.15	-5.66	6.651e-06	0.0001811	YOUNG-BIASED	BCAN
-1.15	-3.59	0.001403	0.006193	YOUNG-BIASED	LOC100287010
-1.15	-3.93	0.0005786	0.003272	YOUNG-BIASED	LOC105747689
-1.15	-3.63	0.001272	0.005751	YOUNG-BIASED	KBTBD12
-1.15	-3.05	0.005269	0.01653	YOUNG-BIASED	MIR2054
-1.15	-4.77	6.569e-05	0.0007445	YOUNG-BIASED	SCUBE3
-1.15	-3.81	0.0007894	0.004091	YOUNG-BIASED	DLGAP2
-1.15	-6.46	8.721e-07	6.364e-05	YOUNG-BIASED	CDH23
-1.15	-5.79	4.807e-06	0.0001485	YOUNG-BIASED	JAM3
-1.15	-4.05	0.0004311	0.002662	YOUNG-BIASED	B3GAT1
-1.15	-6.23	1.579e-06	8.503e-05	YOUNG-BIASED	MARCH9
-1.15	-6.93	2.787e-07	4.168e-05	YOUNG-BIASED	TEX22
-1.15	-5.56	8.497e-06	0.0002046	YOUNG-BIASED	ANKRD63
-1.15	-3.77	0.0008764	0.004393	YOUNG-BIASED	HOXB9
-1.15	-5.34	1.515e-05	0.0002939	YOUNG-BIASED	PTPRS
-1.15	-6.28	1.37e-06	7.881e-05	YOUNG-BIASED	TTC9B
-1.15	-6.14	1.972e-06	9.552e-05	YOUNG-BIASED	PLCB4
-1.15	-7.06	2.031e-07	3.985e-05	YOUNG-BIASED	ADARB1
-1.15	-4.06	0.0004153	0.002588	YOUNG-BIASED	COL6A2
-1.15	-5.08	2.928e-05	0.0004382	YOUNG-BIASED	SCUBE1
-1.14	-6.05	2.456e-06	0.0001076	YOUNG-BIASED	LRRC71
-1.14	-5.82	4.435e-06	0.0001423	YOUNG-BIASED	TRNP1
-1.14	-3.41	0.00221	0.008642	YOUNG-BIASED	ANGPTL3
-1.14	-6.37	1.112e-06	7.156e-05	YOUNG-BIASED	RAB6B
-1.14	-3.71	0.001039	0.004965	YOUNG-BIASED	IRX4
-1.14	-6.32	1.247e-06	7.454e-05	YOUNG-BIASED	MIR449C
-1.14	-3.84	0.000734	0.003888	YOUNG-BIASED	PCDHB9
-1.14	-3.9	0.0006333	0.00349	YOUNG-BIASED	LOC401442
-1.14	-5.04	3.262e-05	0.0004701	YOUNG-BIASED	FAM225A
-1.14	-6.44	9.211e-07	6.448e-05	YOUNG-BIASED	OLFM1
-1.14	-5.14	2.539e-05	0.0004029	YOUNG-BIASED	SCUBE2
-1.14	-5.78	4.929e-06	0.0001502	YOUNG-BIASED	TEAD4
-1.14	-5.26	1.856e-05	0.00033	YOUNG-BIASED	HRK
-1.14	-3.91	0.0006225	0.003443	YOUNG-BIASED	LINC00400
-1.14	-4.89	4.838e-05	0.0006073	YOUNG-BIASED	LHX1
-1.14	-6.23	1.578e-06	8.503e-05	YOUNG-BIASED	RNF165
-1.14	-5.97	3.036e-06	0.0001188	YOUNG-BIASED	NFIX
-1.14	-6.83	3.563e-07	4.581e-05	YOUNG-BIASED	MIR1470
-1.14	-6.52	7.657e-07	6.065e-05	YOUNG-BIASED	ARFGAP1
-1.13	-4.93	4.411e-05	0.0005707	YOUNG-BIASED	CHD5
-1.13	-5.64	7.017e-06	0.0001864	YOUNG-BIASED	ADGRB2
-1.13	-6.64	5.66e-07	5.495e-05	YOUNG-BIASED	DOK1
-1.13	-3.46	0.001956	0.007889	YOUNG-BIASED	CD200R1L
-1.13	-6.85	3.347e-07	4.481e-05	YOUNG-BIASED	CHRD
-1.13	-3.72	0.001	0.004832	YOUNG-BIASED	CTD-2194D22.4
-1.13	-4.95	4.197e-05	0.0005515	YOUNG-BIASED	SNORA98
-1.13	-4.73	7.291e-05	0.000797	YOUNG-BIASED	GBX1
-1.13	-4.46	0.0001484	0.001277	YOUNG-BIASED	ELFN1-AS1
-1.13	-4.62	9.717e-05	0.0009631	YOUNG-BIASED	KCNK9
-1.13	-5.76	5.12e-06	0.0001528	YOUNG-BIASED	KCNT1
-1.13	-6.97	2.487e-07	4.134e-05	YOUNG-BIASED	DNM1
-1.13	-5.69	6.135e-06	0.0001718	YOUNG-BIASED	ENTPD2
-1.13	-6.33	1.219e-06	7.454e-05	YOUNG-BIASED	RCOR2
-1.13	-2.97	0.006491	0.01945	YOUNG-BIASED	PRR20B
-1.13	-6.75	4.311e-07	4.948e-05	YOUNG-BIASED	EVL
-1.13	-6.39	1.036e-06	6.874e-05	YOUNG-BIASED	VASH1
-1.13	-6.43	9.392e-07	6.524e-05	YOUNG-BIASED	ADCY9
-1.13	-6.02	2.683e-06	0.0001117	YOUNG-BIASED	TBC1D24
-1.13	-5.01	3.519e-05	0.0004937	YOUNG-BIASED	HAS3
-1.13	-7.58	5.928e-08	3.231e-05	YOUNG-BIASED	PLD2
-1.13	-5.36	1.436e-05	0.0002842	YOUNG-BIASED	KCNH6
-1.13	-5.08	2.94e-05	0.0004395	YOUNG-BIASED	GJD3
-1.13	-5.7	6.019e-06	0.0001704	YOUNG-BIASED	SAMD14
-1.13	-6.51	7.684e-07	6.068e-05	YOUNG-BIASED	PARD6G
-1.13	-4.12	0.000356	0.002312	YOUNG-BIASED	SYDE1
-1.13	-5.45	1.14e-05	0.0002453	YOUNG-BIASED	ZNF578
-1.13	-6.33	1.229e-06	7.454e-05	YOUNG-BIASED	SYT5
-1.13	-4.85	5.346e-05	0.0006477	YOUNG-BIASED	NKAIN4
-1.13	-6.09	2.219e-06	0.0001018	YOUNG-BIASED	OGFRP1
-1.12	-6.18	1.794e-06	9.08e-05	YOUNG-BIASED	CFAP74
-1.12	-3.59	0.001391	0.00616	YOUNG-BIASED	LOC101927967
-1.12	-3.49	0.001811	0.007461	YOUNG-BIASED	LINC01831
-1.12	-5.81	4.53e-06	0.000143	YOUNG-BIASED	AMER3
-1.12	-4.27	0.0002453	0.00178	YOUNG-BIASED	HOXD9
-1.12	-6.46	8.78e-07	6.364e-05	YOUNG-BIASED	TCF7
-1.12	-4.57	0.0001109	0.00105	YOUNG-BIASED	PCDHGA12
-1.12	-6.57	6.644e-07	5.863e-05	YOUNG-BIASED	BRD3
-1.12	-6.32	1.243e-06	7.454e-05	YOUNG-BIASED	ATOH7
-1.12	-3.63	0.001268	0.005735	YOUNG-BIASED	OR10AG1
-1.12	-5.35	1.466e-05	0.0002876	YOUNG-BIASED	SALRNA1
-1.12	-5.04	3.292e-05	0.0004724	YOUNG-BIASED	FAM189A1
-1.12	-6.07	2.349e-06	0.0001048	YOUNG-BIASED	PIGQ
-1.12	-6.69	4.952e-07	5.081e-05	YOUNG-BIASED	SLC9A3R2
-1.12	-3.97	0.0005229	0.003046	YOUNG-BIASED	FOXF1
-1.12	-6.4	1.016e-06	6.845e-05	YOUNG-BIASED	CHD3
-1.12	-6.71	4.75e-07	5.008e-05	YOUNG-BIASED	SLC8A2
-1.12	-5.05	3.206e-05	0.0004642	YOUNG-BIASED	CBARP
-1.12	-5.36	1.44e-05	0.0002842	YOUNG-BIASED	LINC01749
-1.12	-5.24	1.974e-05	0.0003424	YOUNG-BIASED	ZNF512B
-1.11	-3.39	0.002285	0.008845	YOUNG-BIASED	MIR4666A
-1.11	-4.82	5.802e-05	0.0006853	YOUNG-BIASED	SNTG2
-1.11	-5.77	5.025e-06	0.0001514	YOUNG-BIASED	ATG4B
-1.11	-4.15	0.0003356	0.002219	YOUNG-BIASED	NKX1-1
-1.11	-3.1	0.004696	0.01513	YOUNG-BIASED	MIR3140
-1.11	-7.18	1.52e-07	3.58e-05	YOUNG-BIASED	ADCK2
-1.11	-3.88	0.0006628	0.003612	YOUNG-BIASED	FAM83H
-1.11	-3.92	0.0005936	0.003323	YOUNG-BIASED	FAM83H-AS1
-1.11	-5.78	4.897e-06	0.0001501	YOUNG-BIASED	ZNF618
-1.11	-5.31	1.628e-05	0.000306	YOUNG-BIASED	PPP1R26
-1.11	-3.96	0.0005415	0.00312	YOUNG-BIASED	LRP5
-1.11	-5.53	9.305e-06	0.0002173	YOUNG-BIASED	GRIK4
-1.11	-4.06	0.0004156	0.002589	YOUNG-BIASED	ANO1
-1.11	-5.32	1.596e-05	0.0003023	YOUNG-BIASED	MCAM
-1.11	-3.16	0.004092	0.01366	YOUNG-BIASED	OR6C70
-1.11	-5.98	2.901e-06	0.0001159	YOUNG-BIASED	IL17D
-1.11	-4.65	9.103e-05	0.000925	YOUNG-BIASED	CPLX3
-1.11	-5.85	4.08e-06	0.0001369	YOUNG-BIASED	METRN
-1.11	-4.32	0.0002137	0.001619	YOUNG-BIASED	MMP25
-1.11	-4.23	0.0002681	0.00189	YOUNG-BIASED	NTN1
-1.11	-4.74	7.242e-05	0.0007949	YOUNG-BIASED	SMTNL2
-1.11	-5.66	6.712e-06	0.0001818	YOUNG-BIASED	TMEM132E
-1.11	-6.7	4.909e-07	5.059e-05	YOUNG-BIASED	WIZ
-1.11	-5.43	1.187e-05	0.0002514	YOUNG-BIASED	KDELR3
-1.1	-6.14	1.969e-06	9.552e-05	YOUNG-BIASED	RIMKLA
-1.1	-4.63	9.626e-05	0.0009579	YOUNG-BIASED	BARHL2
-1.1	-3.1	0.004732	0.01522	YOUNG-BIASED	TGFB2-OT1
-1.1	-4.66	8.803e-05	0.0009005	YOUNG-BIASED	MIR194-1
-1.1	-3.6	0.001373	0.0061	YOUNG-BIASED	ACMSD
-1.1	-7.58	5.871e-08	3.231e-05	YOUNG-BIASED	ZDBF2
-1.1	-5.61	7.447e-06	0.0001901	YOUNG-BIASED	SYN2
-1.1	-5.94	3.239e-06	0.0001226	YOUNG-BIASED	C3orf70
-1.1	-5.12	2.645e-05	0.0004126	YOUNG-BIASED	TMEM30CP
-1.1	-5.69	6.08e-06	0.0001712	YOUNG-BIASED	MFSD7
-1.1	-2.7	0.01229	0.03183	YOUNG-BIASED	TMPRSS11GP
-1.1	-5.34	1.501e-05	0.0002919	YOUNG-BIASED	PSD2
-1.1	-4.11	0.0003701	0.002379	YOUNG-BIASED	TFAP2D
-1.1	-6.9	3.008e-07	4.357e-05	YOUNG-BIASED	HTR5A
-1.1	-5.62	7.294e-06	0.0001895	YOUNG-BIASED	DMTN
-1.1	-4.9	4.704e-05	0.000597	YOUNG-BIASED	CACNA1B
-1.1	-2.56	0.01696	0.04099	YOUNG-BIASED	MIR873
-1.1	-6.15	1.929e-06	9.5e-05	YOUNG-BIASED	DPP7
-1.1	-5.55	8.716e-06	0.0002084	YOUNG-BIASED	TMEM210
-1.1	-5.03	3.404e-05	0.0004831	YOUNG-BIASED	ALX4
-1.1	-6.03	2.604e-06	0.0001105	YOUNG-BIASED	MIR3160-1
-1.1	-3.5	0.001745	0.007266	YOUNG-BIASED	SNORD6
-1.1	-7	2.354e-07	4.041e-05	YOUNG-BIASED	LOC101929089
-1.1	-7.02	2.25e-07	3.998e-05	YOUNG-BIASED	TMEM25
-1.1	-3.3	0.00289	0.01054	YOUNG-BIASED	LOC101928449
-1.1	-5.49	1.037e-05	0.0002323	YOUNG-BIASED	CLMN
-1.1	-2.97	0.006503	0.01947	YOUNG-BIASED	SNORD114-16
-1.1	-4.82	5.779e-05	0.0006833	YOUNG-BIASED	NECAB2
-1.1	-5.96	3.055e-06	0.0001192	YOUNG-BIASED	SRCIN1
-1.1	-5.31	1.621e-05	0.0003049	YOUNG-BIASED	KIF19
-1.1	-6.96	2.581e-07	4.136e-05	YOUNG-BIASED	RUNDC3A
-1.1	-5.99	2.828e-06	0.000114	YOUNG-BIASED	C1QL1
-1.1	-6.39	1.043e-06	6.874e-05	YOUNG-BIASED	ZNF236
-1.1	-6.3	1.3e-06	7.653e-05	YOUNG-BIASED	SOCS6
-1.1	-6.43	9.592e-07	6.611e-05	YOUNG-BIASED	GAMT
-1.09	-6.12	2.049e-06	9.68e-05	YOUNG-BIASED	PGBD5
-1.09	-4.24	0.000262	0.001863	YOUNG-BIASED	TP73
-1.09	-4.24	0.0002643	0.001873	YOUNG-BIASED	CLDN22
-1.09	-4.4	0.0001751	0.001416	YOUNG-BIASED	PCDHA12
-1.09	-4.15	0.0003333	0.002208	YOUNG-BIASED	PCDHB18P
-1.09	-4.26	0.0002506	0.001806	YOUNG-BIASED	LINC00583
-1.09	-3.28	0.003001	0.01085	YOUNG-BIASED	LIPJ
-1.09	-6.09	2.241e-06	0.0001021	YOUNG-BIASED	CDK2AP1
-1.09	-5.61	7.528e-06	0.0001907	YOUNG-BIASED	ZIC2
-1.09	-7.02	2.228e-07	3.996e-05	YOUNG-BIASED	PTPN21
-1.09	-5.7	5.999e-06	0.00017	YOUNG-BIASED	SLC22A17
-1.09	-5.43	1.205e-05	0.0002547	YOUNG-BIASED	BEGAIN
-1.09	-4.75	7.013e-05	0.0007795	YOUNG-BIASED	HCN4
-1.09	-6.41	9.99e-07	6.765e-05	YOUNG-BIASED	ITFG1-AS1
-1.09	-6.32	1.239e-06	7.454e-05	YOUNG-BIASED	NETO2
-1.09	-6.96	2.572e-07	4.136e-05	YOUNG-BIASED	RUNDC3A-AS1
-1.09	-5.74	5.461e-06	0.0001603	YOUNG-BIASED	LOC729683
-1.09	-6.51	7.806e-07	6.124e-05	YOUNG-BIASED	LOC100131655
-1.09	-7.28	1.189e-07	3.319e-05	YOUNG-BIASED	ZNF544
-1.09	-4.13	0.0003492	0.00228	YOUNG-BIASED	BHLHE23
-1.08	-5.8	4.609e-06	0.0001442	YOUNG-BIASED	EFNA3
-1.08	-6.48	8.392e-07	6.268e-05	YOUNG-BIASED	SELENON
-1.08	-6.22	1.619e-06	8.632e-05	YOUNG-BIASED	ASAP2
-1.08	-5.01	3.556e-05	0.0004967	YOUNG-BIASED	EMX1
-1.08	-2.65	0.01385	0.03492	YOUNG-BIASED	CP
-1.08	-5.34	1.516e-05	0.0002939	YOUNG-BIASED	HAND1
-1.08	-5.29	1.732e-05	0.0003174	YOUNG-BIASED	SLC22A23
-1.08	-6.8	3.811e-07	4.75e-05	YOUNG-BIASED	CD83
-1.08	-5.74	5.366e-06	0.0001587	YOUNG-BIASED	HR
-1.08	-4.89	4.909e-05	0.0006126	YOUNG-BIASED	FAM225B
-1.08	-4.61	0.0001013	0.0009914	YOUNG-BIASED	LHX2
-1.08	-5.1	2.799e-05	0.0004268	YOUNG-BIASED	MAP6
-1.08	-6.82	3.66e-07	4.633e-05	YOUNG-BIASED	C11orf84
-1.08	-5.63	7.21e-06	0.0001883	YOUNG-BIASED	PLXNC1
-1.08	-6.59	6.392e-07	5.767e-05	YOUNG-BIASED	TMEM229B
-1.08	-5.12	2.69e-05	0.0004167	YOUNG-BIASED	ZBTB42
-1.08	-7	2.336e-07	4.041e-05	YOUNG-BIASED	GLIS2-AS1
-1.08	-4.25	0.0002553	0.001833	YOUNG-BIASED	SDK2
-1.08	-4.3	0.0002224	0.001666	YOUNG-BIASED	SPNS2
-1.08	-6.79	3.941e-07	4.782e-05	YOUNG-BIASED	SARM1
-1.07	-6.38	1.083e-06	7.059e-05	YOUNG-BIASED	GPR137B
-1.07	-4.89	4.811e-05	0.0006053	YOUNG-BIASED	FMN2
-1.07	-4.29	0.0002316	0.001706	YOUNG-BIASED	HTR6
-1.07	-4.6	0.0001046	0.001011	YOUNG-BIASED	CFAP126
-1.07	-3.14	0.004286	0.01417	YOUNG-BIASED	MIR4677
-1.07	-6.03	2.563e-06	0.00011	YOUNG-BIASED	FBXO41
-1.07	-5.58	8.098e-06	0.0002	YOUNG-BIASED	THAP4
-1.07	-6.37	1.115e-06	7.157e-05	YOUNG-BIASED	MDGA1
-1.07	-4.44	0.0001565	0.001323	YOUNG-BIASED	ZC2HC1B
-1.07	-4.69	8.275e-05	0.0008658	YOUNG-BIASED	CCDC166
-1.07	-4.69	8.271e-05	0.0008657	YOUNG-BIASED	LOC101928160
-1.07	-5.87	3.865e-06	0.0001333	YOUNG-BIASED	HRAS
-1.07	-5.85	4.034e-06	0.0001362	YOUNG-BIASED	CDC42BPG
-1.07	-6.43	9.573e-07	6.611e-05	YOUNG-BIASED	GALNT16
-1.07	-4.78	6.458e-05	0.0007379	YOUNG-BIASED	RGS6
-1.07	-5.05	3.23e-05	0.0004671	YOUNG-BIASED	ALDH1A3
-1.07	-5.01	3.574e-05	0.0004988	YOUNG-BIASED	HBQ1
-1.07	-4.83	5.674e-05	0.0006752	YOUNG-BIASED	NTN3
-1.07	-4.12	0.000356	0.002312	YOUNG-BIASED	ANKRD29
-1.07	-4.76	6.895e-05	0.0007696	YOUNG-BIASED	MIR6718
-1.07	-5.45	1.15e-05	0.0002465	YOUNG-BIASED	TCEA2
-1.06	-3.93	0.0005935	0.003322	YOUNG-BIASED	WNT3A
-1.06	-3.89	0.0006496	0.003558	YOUNG-BIASED	GBP3
-1.06	-6.57	6.637e-07	5.863e-05	YOUNG-BIASED	MEX3A
-1.06	-3.72	0.001011	0.004866	YOUNG-BIASED	PRG4
-1.06	-4.99	3.763e-05	0.0005177	YOUNG-BIASED	PCDHGB1
-1.06	-5.25	1.885e-05	0.000333	YOUNG-BIASED	UNC5A
-1.06	-4.03	0.0004533	0.002755	YOUNG-BIASED	RGS20
-1.06	-5.97	2.994e-06	0.0001179	YOUNG-BIASED	CHD7
-1.06	-4.12	0.000355	0.002309	YOUNG-BIASED	GNE
-1.06	-5.95	3.152e-06	0.0001211	YOUNG-BIASED	ABLIM1
-1.06	-3.9	0.0006318	0.003482	YOUNG-BIASED	ZNF32-AS2
-1.06	-6.1	2.156e-06	0.0001005	YOUNG-BIASED	PALD1
-1.06	-5.86	3.943e-06	0.0001347	YOUNG-BIASED	KLHL35
-1.06	-5.13	2.58e-05	0.0004064	YOUNG-BIASED	PIANP
-1.06	-5.17	2.363e-05	0.0003875	YOUNG-BIASED	LOC101927583
-1.06	-6.84	3.49e-07	4.557e-05	YOUNG-BIASED	TMEM253
-1.06	-4.62	9.828e-05	0.0009688	YOUNG-BIASED	EFS
-1.06	-6.52	7.53e-07	6.042e-05	YOUNG-BIASED	CKB
-1.06	-6.79	3.917e-07	4.78e-05	YOUNG-BIASED	CELF6
-1.06	-4.37	0.0001854	0.001472	YOUNG-BIASED	GSG1L
-1.06	-6.99	2.388e-07	4.069e-05	YOUNG-BIASED	SEZ6L2
-1.06	-7.3	1.145e-07	3.301e-05	YOUNG-BIASED	CCDC57
-1.06	-4.99	3.697e-05	0.0005123	YOUNG-BIASED	USH1G
-1.06	-4.99	3.789e-05	0.0005202	YOUNG-BIASED	HCN2
-1.06	-5.99	2.856e-06	0.0001146	YOUNG-BIASED	STRN4
-1.06	-6.02	2.65e-06	0.0001115	YOUNG-BIASED	FKRP
-1.06	-6.09	2.208e-06	0.0001017	YOUNG-BIASED	NAT14
-1.06	-5.24	1.967e-05	0.0003423	YOUNG-BIASED	CHRNA4
-1.05	-6.82	3.62e-07	4.604e-05	YOUNG-BIASED	LMNA
-1.05	-6.57	6.629e-07	5.863e-05	YOUNG-BIASED	ELOA
-1.05	-4.67	8.579e-05	0.0008857	YOUNG-BIASED	DPYSL5
-1.05	-5.4	1.311e-05	0.0002668	YOUNG-BIASED	CACNA2D3
-1.05	-3.65	0.001194	0.005491	YOUNG-BIASED	LOC101927379
-1.05	-5.92	3.452e-06	0.0001264	YOUNG-BIASED	REEP2
-1.05	-2.83	0.008945	0.02488	YOUNG-BIASED	MACC1-AS1
-1.05	-6.93	2.785e-07	4.168e-05	YOUNG-BIASED	LIMK1
-1.05	-5.58	8.134e-06	0.0002005	YOUNG-BIASED	TUSC3
-1.05	-3.79	0.0008338	0.004249	YOUNG-BIASED	MIR4664
-1.05	-6.47	8.492e-07	6.268e-05	YOUNG-BIASED	EHMT1
-1.05	-4.03	0.0004539	0.002757	YOUNG-BIASED	PRDM12
-1.05	-5.62	7.386e-06	0.0001901	YOUNG-BIASED	FGD1
-1.05	-5.84	4.191e-06	0.0001378	YOUNG-BIASED	IGSF9B
-1.05	-7.46	7.761e-08	3.301e-05	YOUNG-BIASED	MAPK8IP1
-1.05	-4.76	6.871e-05	0.0007675	YOUNG-BIASED	MDK
-1.05	-7.32	1.089e-07	3.301e-05	YOUNG-BIASED	RIN1
-1.05	-6.63	5.738e-07	5.514e-05	YOUNG-BIASED	LRFN4
-1.05	-4.73	7.402e-05	0.0008041	YOUNG-BIASED	FGF19
-1.05	-6.61	6.057e-07	5.584e-05	YOUNG-BIASED	TPBGL
-1.05	-2.52	0.01847	0.04374	YOUNG-BIASED	MIR4300
-1.05	-5.47	1.086e-05	0.0002381	YOUNG-BIASED	JPH4
-1.05	-2.7	0.01212	0.03151	YOUNG-BIASED	ADAM20
-1.05	-6.27	1.403e-06	7.952e-05	YOUNG-BIASED	ELMO3
-1.05	-6.13	2.01e-06	9.57e-05	YOUNG-BIASED	OGFOD3
-1.05	-6.52	7.64e-07	6.065e-05	YOUNG-BIASED	SGSM2
-1.05	-6.92	2.868e-07	4.245e-05	YOUNG-BIASED	MAP3K14-AS1
-1.05	-4.91	4.575e-05	0.0005854	YOUNG-BIASED	SPHK1
-1.05	-5.95	3.179e-06	0.0001211	YOUNG-BIASED	PCYT2
-1.05	-5.23	2.028e-05	0.0003484	YOUNG-BIASED	APC2
-1.05	-4.81	6.023e-05	0.0007012	YOUNG-BIASED	CILP2
-1.05	-4.38	0.0001834	0.001461	YOUNG-BIASED	ZNF404
-1.05	-6.07	2.352e-06	0.0001048	YOUNG-BIASED	SMOX
-1.05	-6.3	1.314e-06	7.714e-05	YOUNG-BIASED	L3MBTL1
-1.05	-4.32	0.0002143	0.001621	YOUNG-BIASED	COL18A1
-1.05	-4.17	0.0003152	0.002121	YOUNG-BIASED	CLDN5
-1.04	-3.89	0.0006554	0.00358	YOUNG-BIASED	PRDM16
-1.04	-4.6	0.000103	0.001001	YOUNG-BIASED	CAMK2N1
-1.04	-5.33	1.558e-05	0.0002984	YOUNG-BIASED	SLC6A17
-1.04	-5.66	6.677e-06	0.0001814	YOUNG-BIASED	KIAA1614
-1.04	-6.74	4.418e-07	4.954e-05	YOUNG-BIASED	DGKD
-1.04	-3.66	0.00117	0.005414	YOUNG-BIASED	SOX11
-1.04	-3.85	0.0007267	0.003864	YOUNG-BIASED	HTR2B
-1.04	-3.91	0.0006135	0.003406	YOUNG-BIASED	ZAR1
-1.04	-6.46	8.894e-07	6.364e-05	YOUNG-BIASED	TRIP13
-1.04	-4.75	7.056e-05	0.0007821	YOUNG-BIASED	PCDHGB2
-1.04	-6.46	8.821e-07	6.364e-05	YOUNG-BIASED	BRD9
-1.04	-5.66	6.704e-06	0.0001818	YOUNG-BIASED	PAPD7
-1.04	-6	2.812e-06	0.0001138	YOUNG-BIASED	CDC20B
-1.04	-5.63	7.114e-06	0.0001877	YOUNG-BIASED	SRPK2
-1.04	-7.04	2.124e-07	3.988e-05	YOUNG-BIASED	LOC105375429
-1.04	-5.65	6.758e-06	0.0001823	YOUNG-BIASED	RAI2
-1.04	-5.34	1.524e-05	0.0002948	YOUNG-BIASED	GDI1
-1.04	-6.71	4.739e-07	5.008e-05	YOUNG-BIASED	ZMYND11
-1.04	-3.41	0.002201	0.008624	YOUNG-BIASED	FAS-AS1
-1.04	-4.21	0.0002823	0.001959	YOUNG-BIASED	LBX1-AS1
-1.04	-6.22	1.614e-06	8.625e-05	YOUNG-BIASED	DEGS2
-1.04	-5.56	8.681e-06	0.0002082	YOUNG-BIASED	PYGO1
-1.04	-5.71	5.777e-06	0.0001654	YOUNG-BIASED	HOMER2
-1.04	-5.58	8.248e-06	0.0002021	YOUNG-BIASED	RGS11
-1.04	-5.83	4.272e-06	0.0001399	YOUNG-BIASED	SEPT9
-1.04	-4.64	9.208e-05	0.0009325	YOUNG-BIASED	KCNN1
-1.04	-4.75	6.913e-05	0.0007712	YOUNG-BIASED	LPAR2
-1.04	-5.83	4.289e-06	0.0001403	YOUNG-BIASED	CDH22
-1.04	-5.62	7.284e-06	0.0001895	YOUNG-BIASED	OGFR
-1.04	-5.63	7.108e-06	0.0001877	YOUNG-BIASED	HAR1B
-1.04	-4.48	0.0001428	0.001243	YOUNG-BIASED	TBX1
-1.04	-5.64	7.001e-06	0.0001863	YOUNG-BIASED	AIFM3
-1.04	-3.57	0.00148	0.006452	YOUNG-BIASED	ADM2
-1.03	-5.76	5.093e-06	0.0001523	YOUNG-BIASED	RPS6KA1
-1.03	-5.89	3.649e-06	0.0001309	YOUNG-BIASED	ABL2
-1.03	-6.01	2.739e-06	0.0001123	YOUNG-BIASED	CGREF1
-1.03	-4.14	0.0003403	0.00224	YOUNG-BIASED	NEUROG2
-1.03	-4.54	0.0001192	0.0011	YOUNG-BIASED	PCDHGB8P
-1.03	-2.49	0.01977	0.04622	YOUNG-BIASED	MLIP
-1.03	-5.22	2.085e-05	0.0003557	YOUNG-BIASED	RGS17
-1.03	-4.13	0.0003492	0.00228	YOUNG-BIASED	HCG23
-1.03	-6.78	3.96e-07	4.782e-05	YOUNG-BIASED	ACTL6B
-1.03	-4.43	0.0001604	0.001344	YOUNG-BIASED	TMEFF1
-1.03	-5.4	1.31e-05	0.0002668	YOUNG-BIASED	RXRA
-1.03	-6.61	6.037e-07	5.584e-05	YOUNG-BIASED	GOLM1
-1.03	-5.36	1.441e-05	0.0002842	YOUNG-BIASED	FRRS1L
-1.03	-6.34	1.187e-06	7.334e-05	YOUNG-BIASED	ARRDC1-AS1
-1.03	-6.4	1.021e-06	6.847e-05	YOUNG-BIASED	LINC00866
-1.03	-5.61	7.483e-06	0.0001907	YOUNG-BIASED	CREB3L1
-1.03	-7.7	4.393e-08	2.903e-05	YOUNG-BIASED	LOC101927495
-1.03	-3.57	0.001463	0.0064	YOUNG-BIASED	MIR920
-1.03	-6.25	1.489e-06	8.231e-05	YOUNG-BIASED	ZBTB39
-1.03	-4.43	0.0001615	0.001351	YOUNG-BIASED	P2RX2
-1.03	-3.1	0.004764	0.01529	YOUNG-BIASED	LINC00557
-1.03	-6.88	3.165e-07	4.42e-05	YOUNG-BIASED	RABGGTA
-1.03	-5.57	8.429e-06	0.0002035	YOUNG-BIASED	CHMP6
-1.03	-5.81	4.573e-06	0.0001439	YOUNG-BIASED	KCTD15
-1.03	-4.93	4.354e-05	0.0005654	YOUNG-BIASED	ADM5
-1.03	-6.93	2.749e-07	4.168e-05	YOUNG-BIASED	CCDC106
-1.03	-5.74	5.423e-06	0.0001595	YOUNG-BIASED	ZNF329
-1.03	-4.75	7.026e-05	0.0007797	YOUNG-BIASED	NEFH
-1.02	-6.17	1.812e-06	9.108e-05	YOUNG-BIASED	PATJ
-1.02	-5.41	1.272e-05	0.0002624	YOUNG-BIASED	PLCH2
-1.02	-5.44	1.158e-05	0.000247	YOUNG-BIASED	DISP3
-1.02	-5.95	3.159e-06	0.0001211	YOUNG-BIASED	RCAN3AS
-1.02	-5.96	3.058e-06	0.0001192	YOUNG-BIASED	RCAN3
-1.02	-5.33	1.543e-05	0.0002965	YOUNG-BIASED	REEP1
-1.02	-3.47	0.001891	0.007699	YOUNG-BIASED	GDF7
-1.02	-5.07	3.073e-05	0.0004517	YOUNG-BIASED	RAPGEF4-AS1
-1.02	-6.4	1.018e-06	6.845e-05	YOUNG-BIASED	ZNF518B
-1.02	-4.1	0.0003784	0.002419	YOUNG-BIASED	ANXA3
-1.02	-2.95	0.006797	0.02015	YOUNG-BIASED	MIR577
-1.02	-5.72	5.705e-06	0.0001644	YOUNG-BIASED	ZNF454
-1.02	-3.4	0.002246	0.008741	YOUNG-BIASED	SEMA5A-AS1
-1.02	-4.79	6.304e-05	0.0007245	YOUNG-BIASED	WBSCR17
-1.02	-6.02	2.674e-06	0.0001116	YOUNG-BIASED	FAM160B2
-1.02	-5.72	5.701e-06	0.0001644	YOUNG-BIASED	INPP5E
-1.02	-6.02	2.663e-06	0.0001115	YOUNG-BIASED	RABL6
-1.02	-5.88	3.808e-06	0.0001326	YOUNG-BIASED	CABP4
-1.02	-3.76	0.0008946	0.004446	YOUNG-BIASED	LOC101927248
-1.02	-3.39	0.002279	0.008832	YOUNG-BIASED	SNORD114-1
-1.02	-6.62	5.958e-07	5.565e-05	YOUNG-BIASED	UNC119
-1.02	-5.72	5.696e-06	0.0001644	YOUNG-BIASED	C17orf102
-1.02	-5.24	1.939e-05	0.0003386	YOUNG-BIASED	RASL10B
-1.02	-5.55	8.782e-06	0.0002094	YOUNG-BIASED	LOC105371907
-1.02	-6.28	1.384e-06	7.912e-05	YOUNG-BIASED	CERS4
-1.02	-6.14	1.958e-06	9.539e-05	YOUNG-BIASED	PPDPF
-1.02	-6.45	9.014e-07	6.408e-05	YOUNG-BIASED	KCTD17
-1.01	-5.44	1.154e-05	0.0002469	YOUNG-BIASED	LINC01770
-1.01	-2.82	0.009188	0.02541	YOUNG-BIASED	NCOA1
-1.01	-4.47	0.0001432	0.001245	YOUNG-BIASED	C2orf72
-1.01	-5.5	9.986e-06	0.0002272	YOUNG-BIASED	BOK-AS1
-1.01	-5.14	2.527e-05	0.0004018	YOUNG-BIASED	BOK
-1.01	-6.38	1.08e-06	7.059e-05	YOUNG-BIASED	EFCC1
-1.01	-5.98	2.916e-06	0.0001162	YOUNG-BIASED	THPO
-1.01	-5.07	3.074e-05	0.0004517	YOUNG-BIASED	LINC00682
-1.01	-4.23	0.0002683	0.00189	YOUNG-BIASED	NR2F1
-1.01	-3.8	0.0008126	0.00417	YOUNG-BIASED	LINC02104
-1.01	-5.81	4.579e-06	0.0001439	YOUNG-BIASED	PRR7
-1.01	-4.06	0.0004185	0.002602	YOUNG-BIASED	MIR5690
-1.01	-7.22	1.386e-07	3.413e-05	YOUNG-BIASED	DNAAF5
-1.01	-5.17	2.336e-05	0.0003847	YOUNG-BIASED	RAPGEF5
-1.01	-4.4	0.0001719	0.001399	YOUNG-BIASED	KIAA1549
-1.01	-6.09	2.222e-06	0.0001018	YOUNG-BIASED	TBXAS1
-1.01	-5.67	6.433e-06	0.0001771	YOUNG-BIASED	ADRA2A
-1.01	-6.12	2.051e-06	9.68e-05	YOUNG-BIASED	NPAS4
-1.01	-4.02	0.0004669	0.002812	YOUNG-BIASED	SIGIRR
-1.01	-5.32	1.581e-05	0.0003007	YOUNG-BIASED	CHST1
-1.01	-5.38	1.364e-05	0.0002751	YOUNG-BIASED	RASGRP2
-1.01	-3.37	0.002442	0.009296	YOUNG-BIASED	CCDC168
-1.01	-5.99	2.883e-06	0.0001155	YOUNG-BIASED	BRF1
-1.01	-7.06	2.045e-07	3.985e-05	YOUNG-BIASED	CDH24
-1.01	-5.39	1.326e-05	0.0002688	YOUNG-BIASED	ARNT2
-1.01	-6.14	1.958e-06	9.539e-05	YOUNG-BIASED	MYO5C
-1.01	-6.7	4.912e-07	5.059e-05	YOUNG-BIASED	CIB2
-1.01	-4.96	4.059e-05	0.0005398	YOUNG-BIASED	NGFR
-1.01	-5.23	1.998e-05	0.000345	YOUNG-BIASED	LIMD2
-1.01	-5.29	1.738e-05	0.0003181	YOUNG-BIASED	CYGB
-1.01	-6.19	1.731e-06	8.926e-05	YOUNG-BIASED	ARID3A
-1.01	-5.59	7.941e-06	0.0001972	YOUNG-BIASED	CTXN1
-1.01	-3.59	0.001401	0.006189	YOUNG-BIASED	NOTCH3
-1.01	-5.64	6.974e-06	0.0001861	YOUNG-BIASED	UNC13A
-1.01	-3.51	0.001716	0.007174	YOUNG-BIASED	LOC101929413
-1.01	-4.53	0.000123	0.001124	YOUNG-BIASED	SLC32A1
-1.01	-3.15	0.004189	0.01393	YOUNG-BIASED	KRTAP22-2
-1.01	-4.58	0.0001078	0.00103	YOUNG-BIASED	CABP7
-1	-6.36	1.14e-06	7.165e-05	YOUNG-BIASED	ZNF496
-1	-5.29	1.72e-05	0.0003164	YOUNG-BIASED	KIF17
-1	-4.03	0.0004573	0.002773	YOUNG-BIASED	DMRTA2
-1	-4.82	5.832e-05	0.0006871	YOUNG-BIASED	OTX1
-1	-4.17	0.0003195	0.00214	YOUNG-BIASED	SP9
-1	-3.42	0.002162	0.008508	YOUNG-BIASED	ICOS
-1	-5.12	2.663e-05	0.0004144	YOUNG-BIASED	CHL1-AS2
-1	-5.77	5.053e-06	0.0001518	YOUNG-BIASED	MAP6D1
-1	-2.92	0.007336	0.02141	YOUNG-BIASED	KIAA1109
-1	-4.57	0.0001118	0.001055	YOUNG-BIASED	LOC102723704
-1	-5.73	5.577e-06	0.000163	YOUNG-BIASED	NEURL1B
-1	-5.16	2.407e-05	0.0003912	YOUNG-BIASED	TTBK1
-1	-4.24	0.0002661	0.001883	YOUNG-BIASED	SNORA29
-1	-5.89	3.669e-06	0.0001311	YOUNG-BIASED	AFDN-AS1
-1	-5.18	2.286e-05	0.000379	YOUNG-BIASED	GPER1
-1	-4.87	5.051e-05	0.0006257	YOUNG-BIASED	IGFBPL1
-1	-5.51	9.813e-06	0.0002241	YOUNG-BIASED	MIR3160-2
-1	-5.55	8.766e-06	0.0002092	YOUNG-BIASED	AP5B1
-1	-5.7	6.044e-06	0.0001704	YOUNG-BIASED	GPR152
-1	-6.66	5.388e-07	5.269e-05	YOUNG-BIASED	SCN3B
-1	-5.19	2.229e-05	0.0003732	YOUNG-BIASED	BICDL1
-1	-4.32	0.0002132	0.001618	YOUNG-BIASED	WNT1
-1	-5.92	3.439e-06	0.0001264	YOUNG-BIASED	DOCK9
-1	-2.65	0.0137	0.0346	YOUNG-BIASED	FOXG1
-1	-3.21	0.003587	0.01239	YOUNG-BIASED	LINC01551
-1	-6.24	1.519e-06	8.33e-05	YOUNG-BIASED	ABHD17C
-1	-5.54	9.106e-06	0.0002139	YOUNG-BIASED	ITPKA
-1	-6.09	2.234e-06	0.000102	YOUNG-BIASED	PAQR4
-1	-6.19	1.75e-06	8.944e-05	YOUNG-BIASED	MLLT6
-1	-3.71	0.001019	0.004891	YOUNG-BIASED	LINC01415
-1	-5.69	6.111e-06	0.0001714	YOUNG-BIASED	RTBDN
-1	-5.4	1.298e-05	0.000266	YOUNG-BIASED	SLC4A11
-1	-7	2.357e-07	4.041e-05	YOUNG-BIASED	SLCO4A1
-1	-6.21	1.631e-06	8.682e-05	YOUNG-BIASED	PRDM15
-0.99	-6.84	3.477e-07	4.557e-05	YOUNG-BIASED	NBL1
-0.99	-7.04	2.126e-07	3.988e-05	YOUNG-BIASED	MRPL9
-0.99	-3.73	0.0009884	0.004784	YOUNG-BIASED	ACOXL-AS1
-0.99	-3.93	0.0005897	0.003307	YOUNG-BIASED	HOXD8
-0.99	-2.82	0.0092	0.02543	YOUNG-BIASED	LOC100130452
-0.99	-6.35	1.157e-06	7.222e-05	YOUNG-BIASED	ATXN7
-0.99	-4	0.0004855	0.002888	YOUNG-BIASED	LINC02011
-0.99	-5.34	1.5e-05	0.0002919	YOUNG-BIASED	JAKMIP1
-0.99	-5.09	2.879e-05	0.0004334	YOUNG-BIASED	C4orf48
-0.99	-7.09	1.883e-07	3.924e-05	YOUNG-BIASED	CLPTM1L
-0.99	-3.01	0.005877	0.018	YOUNG-BIASED	CARD6
-0.99	-4.31	0.0002175	0.001637	YOUNG-BIASED	PROB1
-0.99	-5.32	1.579e-05	0.0003007	YOUNG-BIASED	COL26A1
-0.99	-3.99	0.0005038	0.002965	YOUNG-BIASED	HYALP1
-0.99	-6.34	1.189e-06	7.334e-05	YOUNG-BIASED	ZNF777
-0.99	-7.22	1.382e-07	3.413e-05	YOUNG-BIASED	AK8
-0.99	-4.21	0.000283	0.001961	YOUNG-BIASED	ST8SIA6
-0.99	-3.6	0.001355	0.006032	YOUNG-BIASED	OR13A1
-0.99	-6	2.773e-06	0.000113	YOUNG-BIASED	PIDD1
-0.99	-3.04	0.005497	0.01709	YOUNG-BIASED	MS4A2
-0.99	-5.72	5.738e-06	0.0001648	YOUNG-BIASED	TESC-AS1
-0.99	-5.18	2.276e-05	0.000378	YOUNG-BIASED	NXPH4
-0.99	-5.76	5.089e-06	0.0001523	YOUNG-BIASED	TESC
-0.99	-6.36	1.122e-06	7.158e-05	YOUNG-BIASED	FBRSL1
-0.99	-3.67	0.001143	0.005327	YOUNG-BIASED	LINC00452
-0.99	-6.63	5.838e-07	5.552e-05	YOUNG-BIASED	TSR1
-0.99	-5.86	3.959e-06	0.0001347	YOUNG-BIASED	NAA38
-0.99	-6.14	1.975e-06	9.552e-05	YOUNG-BIASED	CHAD
-0.99	-4.82	5.862e-05	0.0006892	YOUNG-BIASED	MYO15B
-0.99	-4.59	0.0001046	0.001011	YOUNG-BIASED	CACNA1A
-0.99	-6.47	8.588e-07	6.305e-05	YOUNG-BIASED	LRP3
-0.99	-5.24	1.959e-05	0.0003411	YOUNG-BIASED	RIMS4
-0.98	-4.29	0.0002318	0.001706	YOUNG-BIASED	ETNK2
-0.98	-4.7	7.889e-05	0.000839	YOUNG-BIASED	GALNT14
-0.98	-2.94	0.006967	0.02054	YOUNG-BIASED	LINC01376
-0.98	-5.06	3.121e-05	0.0004556	YOUNG-BIASED	SEMA5B
-0.98	-5.59	7.968e-06	0.0001975	YOUNG-BIASED	GPR62
-0.98	-2.64	0.01416	0.03552	YOUNG-BIASED	MIR7978
-0.98	-3.68	0.001118	0.005253	YOUNG-BIASED	LEF1-AS1
-0.98	-4.78	6.519e-05	0.0007413	YOUNG-BIASED	FOXC1
-0.98	-5.88	3.801e-06	0.0001325	YOUNG-BIASED	VPS37D
-0.98	-4.19	0.0003013	0.002051	YOUNG-BIASED	ECM2
-0.98	-6.04	2.494e-06	0.0001087	YOUNG-BIASED	CNIH2
-0.98	-4.72	7.48e-05	0.0008096	YOUNG-BIASED	PRIMA1
-0.98	-4.24	0.0002637	0.00187	YOUNG-BIASED	NTRK3
-0.98	-3.62	0.001306	0.005862	YOUNG-BIASED	GOLGA8A
-0.98	-5.57	8.392e-06	0.0002035	YOUNG-BIASED	NME4
-0.98	-5.15	2.478e-05	0.0003961	YOUNG-BIASED	STX1B
-0.98	-4.7	7.952e-05	0.0008444	YOUNG-BIASED	ADORA2B
-0.98	-4.57	0.0001125	0.001058	YOUNG-BIASED	OTOP2
-0.98	-5.83	4.304e-06	0.0001403	YOUNG-BIASED	HEXDC
-0.98	-3.97	0.0005317	0.00308	YOUNG-BIASED	MIR4745
-0.98	-4.84	5.493e-05	0.000659	YOUNG-BIASED	TMEM59L
-0.98	-5.61	7.547e-06	0.0001909	YOUNG-BIASED	CLIP3
-0.98	-3.65	0.001207	0.00554	YOUNG-BIASED	TTYH1
-0.98	-5.43	1.196e-05	0.000253	YOUNG-BIASED	VSTM2L
-0.98	-5.16	2.425e-05	0.0003918	YOUNG-BIASED	PHACTR3
-0.98	-3.32	0.002716	0.01005	YOUNG-BIASED	NKX2-2
-0.98	-5.2	2.165e-05	0.0003649	YOUNG-BIASED	KCNB1
-0.98	-3.73	0.0009856	0.004775	YOUNG-BIASED	COL9A3
-0.98	-5.07	3.013e-05	0.0004465	YOUNG-BIASED	EMID1
-0.97	-5.96	3.108e-06	0.0001201	YOUNG-BIASED	LOC102724450
-0.97	-6.45	8.931e-07	6.366e-05	YOUNG-BIASED	RCC2
-0.97	-6.52	7.561e-07	6.042e-05	YOUNG-BIASED	GMEB1
-0.97	-4.8	6.096e-05	0.0007073	YOUNG-BIASED	TMEM54
-0.97	-5	3.662e-05	0.0005088	YOUNG-BIASED	RNF144A-AS1
-0.97	-3.86	0.0007056	0.003785	YOUNG-BIASED	HOXD11
-0.97	-5.17	2.359e-05	0.0003875	YOUNG-BIASED	CHL1
-0.97	-5.42	1.231e-05	0.0002574	YOUNG-BIASED	SEL1L3
-0.97	-5.03	3.417e-05	0.0004838	YOUNG-BIASED	PACSIN1
-0.97	-5.87	3.836e-06	0.0001329	YOUNG-BIASED	AFDN
-0.97	-5.1	2.841e-05	0.0004306	YOUNG-BIASED	MMD2
-0.97	-6.44	9.304e-07	6.479e-05	YOUNG-BIASED	SMKR1
-0.97	-6.1	2.164e-06	0.0001005	YOUNG-BIASED	TMOD1
-0.97	-6.04	2.508e-06	0.0001087	YOUNG-BIASED	PKN3
-0.97	-3.64	0.00123	0.005616	YOUNG-BIASED	LOC101929234
-0.97	-2.49	0.01963	0.04597	YOUNG-BIASED	LIPK
-0.97	-6.69	5.019e-07	5.111e-05	YOUNG-BIASED	PSD
-0.97	-4.62	9.797e-05	0.000968	YOUNG-BIASED	LMO1
-0.97	-3.33	0.00267	0.009935	YOUNG-BIASED	MIR17
-0.97	-3.27	0.003123	0.01118	YOUNG-BIASED	MIR18A
-0.97	-5.25	1.89e-05	0.0003331	YOUNG-BIASED	ARHGEF7-AS2
-0.97	-5.18	2.265e-05	0.0003764	YOUNG-BIASED	TMEM179
-0.97	-4	0.0004892	0.002903	YOUNG-BIASED	KIF7
-0.97	-3.26	0.003156	0.01126	YOUNG-BIASED	PCSK6
-0.97	-5.4	1.301e-05	0.0002661	YOUNG-BIASED	CDYL2
-0.97	-5.48	1.043e-05	0.0002334	YOUNG-BIASED	NME3
-0.97	-4.79	6.252e-05	0.00072	YOUNG-BIASED	LRRC75A
-0.97	-2.51	0.01881	0.04443	YOUNG-BIASED	ABCA10
-0.97	-5.49	1.025e-05	0.0002311	YOUNG-BIASED	SLC25A10
-0.97	-4.53	0.0001254	0.001135	YOUNG-BIASED	DOK6
-0.97	-4.95	4.196e-05	0.0005515	YOUNG-BIASED	PALM
-0.97	-3.54	0.001568	0.006729	YOUNG-BIASED	FBN3
-0.97	-6.03	2.573e-06	0.00011	YOUNG-BIASED	MAP1S
-0.97	-5.97	3.035e-06	0.0001188	YOUNG-BIASED	YJEFN3
-0.97	-5.93	3.303e-06	0.0001235	YOUNG-BIASED	LIN7B
-0.97	-5.06	3.12e-05	0.0004556	YOUNG-BIASED	EEF1A2
-0.96	-4.41	0.000171	0.001394	YOUNG-BIASED	ALPL
-0.96	-4.42	0.0001636	0.001361	YOUNG-BIASED	TNFRSF18
-0.96	-5.6	7.803e-06	0.0001952	YOUNG-BIASED	GNB1
-0.96	-2.98	0.006262	0.01893	YOUNG-BIASED	SNORD44
-0.96	-3.94	0.0005747	0.003256	YOUNG-BIASED	FAM89A
-0.96	-4.48	0.0001429	0.001243	YOUNG-BIASED	UNC80
-0.96	-5.42	1.224e-05	0.0002568	YOUNG-BIASED	GPC1
-0.96	-5.92	3.389e-06	0.0001254	YOUNG-BIASED	SPATA18
-0.96	-5.15	2.459e-05	0.000394	YOUNG-BIASED	LOC285484
-0.96	-4.89	4.815e-05	0.0006053	YOUNG-BIASED	SLC35F1
-0.96	-4.36	0.0001931	0.001507	YOUNG-BIASED	RNF182
-0.96	-6.46	8.816e-07	6.364e-05	YOUNG-BIASED	BEND3
-0.96	-3.88	0.0006625	0.003611	YOUNG-BIASED	HOXA3
-0.96	-5.65	6.812e-06	0.0001832	YOUNG-BIASED	TRMT10B
-0.96	-4.4	0.000172	0.001399	YOUNG-BIASED	ZIC3
-0.96	-5.05	3.199e-05	0.0004639	YOUNG-BIASED	PFKP
-0.96	-6.61	6.06e-07	5.584e-05	YOUNG-BIASED	ASB13
-0.96	-4.18	0.0003074	0.002079	YOUNG-BIASED	OR51E2
-0.96	-4.54	0.0001203	0.001107	YOUNG-BIASED	CDKN1C
-0.96	-4.76	6.878e-05	0.000768	YOUNG-BIASED	BTBD18
-0.96	-5.46	1.117e-05	0.0002423	YOUNG-BIASED	PLCB3
-0.96	-3.79	0.0008335	0.004248	YOUNG-BIASED	FUT8
-0.96	-5.35	1.478e-05	0.0002888	YOUNG-BIASED	PLEKHD1
-0.96	-6.06	2.377e-06	0.0001052	YOUNG-BIASED	LOC102723354
-0.96	-5.28	1.781e-05	0.0003225	YOUNG-BIASED	LOC100128770
-0.96	-6.74	4.378e-07	4.954e-05	YOUNG-BIASED	ZNF629
-0.96	-3.44	0.002052	0.008179	YOUNG-BIASED	FENDRR
-0.96	-6.04	2.537e-06	0.0001095	YOUNG-BIASED	NT5M
-0.96	-4.04	0.0004369	0.002683	YOUNG-BIASED	ODF3L2
-0.96	-6.18	1.751e-06	8.944e-05	YOUNG-BIASED	MBD3
-0.96	-3.77	0.0008939	0.004444	YOUNG-BIASED	BCAM
-0.96	-4.29	0.0002294	0.001696	YOUNG-BIASED	TGIF2-C20orf24
-0.96	-5.61	7.454e-06	0.0001901	YOUNG-BIASED	BCR
-0.95	-5.64	7.04e-06	0.0001864	YOUNG-BIASED	FBXO2
-0.95	-2.9	0.007605	0.02205	YOUNG-BIASED	TRPM8
-0.95	-5.82	4.458e-06	0.0001424	YOUNG-BIASED	CHST10
-0.95	-3.4	0.002265	0.008799	YOUNG-BIASED	LINC01124
-0.95	-7.06	2.015e-07	3.985e-05	YOUNG-BIASED	COPS9
-0.95	-5.72	5.738e-06	0.0001648	YOUNG-BIASED	MED12L
-0.95	-4.79	6.322e-05	0.0007254	YOUNG-BIASED	SNRK-AS1
-0.95	-3.65	0.001208	0.005544	YOUNG-BIASED	PCDHA3
-0.95	-5.4	1.29e-05	0.0002651	YOUNG-BIASED	RASGEF1C
-0.95	-5.53	9.353e-06	0.000218	YOUNG-BIASED	GRM4
-0.95	-3.21	0.003632	0.0125	YOUNG-BIASED	SNORD50A
-0.95	-3.57	0.001465	0.006408	YOUNG-BIASED	LOC101928168
-0.95	-3.61	0.001325	0.005925	YOUNG-BIASED	LINC01007
-0.95	-5.62	7.297e-06	0.0001895	YOUNG-BIASED	PRRT4
-0.95	-4.78	6.532e-05	0.0007419	YOUNG-BIASED	XKR4
-0.95	-3.42	0.002115	0.008361	YOUNG-BIASED	MAPK15
-0.95	-5.96	3.068e-06	0.0001192	YOUNG-BIASED	CIZ1
-0.95	-4.98	3.829e-05	0.0005235	YOUNG-BIASED	DSCAML1
-0.95	-5.26	1.855e-05	0.00033	YOUNG-BIASED	DGKZ
-0.95	-4.02	0.0004643	0.002802	YOUNG-BIASED	LOC102723895
-0.95	-5.97	2.992e-06	0.0001179	YOUNG-BIASED	SLC25A22
-0.95	-6.42	9.804e-07	6.673e-05	YOUNG-BIASED	C11orf95
-0.95	-4.31	0.0002171	0.001636	YOUNG-BIASED	LRRC32
-0.95	-6.69	5.041e-07	5.115e-05	YOUNG-BIASED	LOC100506125
-0.95	-5.45	1.131e-05	0.0002441	YOUNG-BIASED	ARL6IP4
-0.95	-5.42	1.216e-05	0.0002558	YOUNG-BIASED	PPP1R36
-0.95	-4.74	7.207e-05	0.0007917	YOUNG-BIASED	PRTG
-0.95	-5.15	2.458e-05	0.000394	YOUNG-BIASED	DLL4
-0.95	-6.13	1.991e-06	9.565e-05	YOUNG-BIASED	USP7
-0.95	-6.21	1.664e-06	8.773e-05	YOUNG-BIASED	ZNF598
-0.95	-6.01	2.731e-06	0.0001121	YOUNG-BIASED	CTU2
-0.95	-5.03	3.4e-05	0.000483	YOUNG-BIASED	HIC1
-0.95	-4.76	6.809e-05	0.0007619	YOUNG-BIASED	KLK13
-0.95	-6.59	6.418e-07	5.767e-05	YOUNG-BIASED	ZIK1
-0.95	-5.79	4.792e-06	0.0001484	YOUNG-BIASED	ZNF154
-0.95	-5.47	1.091e-05	0.0002388	YOUNG-BIASED	ATP9A
-0.95	-6.42	9.65e-07	6.618e-05	YOUNG-BIASED	SCRT2
-0.95	-5.78	4.861e-06	0.0001496	YOUNG-BIASED	SOGA1
-0.95	-4.39	0.0001787	0.001438	YOUNG-BIASED	EMILIN3
-0.94	-5.13	2.589e-05	0.0004072	YOUNG-BIASED	ZSWIM5
-0.94	-6.32	1.244e-06	7.454e-05	YOUNG-BIASED	SRM
-0.94	-2.49	0.01968	0.04606	YOUNG-BIASED	SCN2A
-0.94	-3.95	0.0005631	0.003208	YOUNG-BIASED	HOXD-AS2
-0.94	-4.01	0.0004715	0.00283	YOUNG-BIASED	ADCY5
-0.94	-5.72	5.722e-06	0.0001647	YOUNG-BIASED	TMEM158
-0.94	-4.56	0.0001136	0.001065	YOUNG-BIASED	MAGI1-AS1
-0.94	-2.79	0.009952	0.027	YOUNG-BIASED	MIR576
-0.94	-4.54	0.0001204	0.001107	YOUNG-BIASED	OTP
-0.94	-3.27	0.00307	0.01103	YOUNG-BIASED	MIR548P
-0.94	-2.46	0.0209	0.04828	YOUNG-BIASED	GABRR1
-0.94	-3.53	0.001635	0.006933	YOUNG-BIASED	TEAD3
-0.94	-5.17	2.367e-05	0.0003879	YOUNG-BIASED	CUX1
-0.94	-4.17	0.0003179	0.002132	YOUNG-BIASED	SP8
-0.94	-3.93	0.0005922	0.003316	YOUNG-BIASED	AEBP1
-0.94	-3.72	0.001004	0.004846	YOUNG-BIASED	NAT16
-0.94	-3.76	0.0008969	0.004452	YOUNG-BIASED	LOC102723703
-0.94	-6.42	9.677e-07	6.619e-05	YOUNG-BIASED	PAOX
-0.94	-4.98	3.838e-05	0.0005243	YOUNG-BIASED	KCNC1
-0.94	-4.8	6.155e-05	0.0007119	YOUNG-BIASED	LOC101928943
-0.94	-5.95	3.149e-06	0.0001211	YOUNG-BIASED	RPS6KA4
-0.94	-3.12	0.004505	0.01469	YOUNG-BIASED	ABCC9
-0.94	-6.62	5.972e-07	5.565e-05	YOUNG-BIASED	ADCY6
-0.94	-4.43	0.0001587	0.001334	YOUNG-BIASED	C1QL4
-0.94	-4.97	3.931e-05	0.0005314	YOUNG-BIASED	DNAJC22
-0.94	-6.28	1.373e-06	7.883e-05	YOUNG-BIASED	ANKLE2
-0.94	-3.66	0.001164	0.005394	YOUNG-BIASED	KLF5
-0.94	-5.16	2.392e-05	0.0003904	YOUNG-BIASED	FAM81A
-0.94	-5.46	1.104e-05	0.0002403	YOUNG-BIASED	C15orf56
-0.94	-4.36	0.0001911	0.0015	YOUNG-BIASED	CPNE2
-0.94	-2.94	0.006924	0.02044	YOUNG-BIASED	LOC101927009
-0.94	-5.14	2.527e-05	0.0004018	YOUNG-BIASED	C16orf74
-0.94	-6.01	2.694e-06	0.0001117	YOUNG-BIASED	RNF166
-0.94	-5.61	7.527e-06	0.0001907	YOUNG-BIASED	SEZ6
-0.94	-5.71	5.785e-06	0.0001654	YOUNG-BIASED	MAFG-AS1
-0.94	-5.14	2.553e-05	0.0004043	YOUNG-BIASED	LINC01535
-0.94	-6.03	2.59e-06	0.0001103	YOUNG-BIASED	NACC1
-0.94	-3.78	0.0008525	0.00432	YOUNG-BIASED	MIR3187
-0.94	-5.17	2.352e-05	0.0003871	YOUNG-BIASED	GMIP
-0.94	-3.86	0.0006935	0.003738	YOUNG-BIASED	EXOC3L2
-0.94	-6.32	1.244e-06	7.454e-05	YOUNG-BIASED	PTOV1-AS1
-0.94	-3.65	0.00119	0.005478	YOUNG-BIASED	C21orf91-OT1
-0.94	-2.58	0.016	0.03915	YOUNG-BIASED	ANKRD62P1-PARP4P3
-0.94	-4.77	6.604e-05	0.0007476	YOUNG-BIASED	RASD2
-0.93	-4.02	0.0004673	0.002814	YOUNG-BIASED	FBLIM1
-0.93	-4.04	0.0004404	0.002699	YOUNG-BIASED	TMEM200B
-0.93	-5.34	1.515e-05	0.0002939	YOUNG-BIASED	LOC100132111
-0.93	-4.5	0.000133	0.001184	YOUNG-BIASED	COLEC11
-0.93	-6.16	1.877e-06	9.328e-05	YOUNG-BIASED	DNMT3A
-0.93	-3.24	0.003315	0.01169	YOUNG-BIASED	SP5
-0.93	-4.29	0.0002316	0.001706	YOUNG-BIASED	SCG2
-0.93	-5.09	2.913e-05	0.0004366	YOUNG-BIASED	MIR149
-0.93	-3.55	0.001559	0.006704	YOUNG-BIASED	ARHGEF3-AS1
-0.93	-5.78	4.933e-06	0.0001502	YOUNG-BIASED	LOC101930370
-0.93	-2.96	0.006684	0.01989	YOUNG-BIASED	C1QTNF7
-0.93	-2.69	0.01253	0.03231	YOUNG-BIASED	LOC340017
-0.93	-5.63	7.18e-06	0.0001883	YOUNG-BIASED	SEPT8
-0.93	-5.66	6.564e-06	0.0001794	YOUNG-BIASED	FAM20C
-0.93	-5.68	6.325e-06	0.0001752	YOUNG-BIASED	LRRC4
-0.93	-5.48	1.051e-05	0.0002342	YOUNG-BIASED	LRRC24
-0.93	-5.87	3.908e-06	0.0001342	YOUNG-BIASED	MFHAS1
-0.93	-6.76	4.152e-07	4.883e-05	YOUNG-BIASED	R3HCC1
-0.93	-5.09	2.859e-05	0.0004319	YOUNG-BIASED	NKX6-3
-0.93	-4.11	0.0003642	0.002351	YOUNG-BIASED	ABO
-0.93	-3.97	0.0005277	0.003066	YOUNG-BIASED	NRG3
-0.93	-5.91	3.548e-06	0.0001285	YOUNG-BIASED	C10orf35
-0.93	-3.91	0.000613	0.003405	YOUNG-BIASED	LBX1
-0.93	-3.47	0.001873	0.007648	YOUNG-BIASED	HMX3
-0.93	-4.23	0.0002719	0.001907	YOUNG-BIASED	UTF1
-0.93	-4.29	0.0002305	0.001699	YOUNG-BIASED	FUOM
-0.93	-4.96	4.083e-05	0.0005417	YOUNG-BIASED	DKFZp686K1684
-0.93	-4.89	4.837e-05	0.0006073	YOUNG-BIASED	ARHGEF7
-0.93	-3.5	0.001739	0.007252	YOUNG-BIASED	SNORD115-45
-0.93	-4.56	0.0001148	0.001073	YOUNG-BIASED	YBX2
-0.93	-7.04	2.114e-07	3.988e-05	YOUNG-BIASED	XYLT2
-0.93	-5.52	9.542e-06	0.0002201	YOUNG-BIASED	MAFG
-0.93	-5.63	7.247e-06	0.0001889	YOUNG-BIASED	ARHGEF1
-0.93	-3.52	0.001655	0.006996	YOUNG-BIASED	LOC100505585
-0.93	-3.51	0.001691	0.007102	YOUNG-BIASED	MLLT10P1
-0.93	-3.54	0.001592	0.006794	YOUNG-BIASED	TFAP2C
-0.93	-3.13	0.004334	0.01428	YOUNG-BIASED	LINC01695
-0.92	-5.06	3.111e-05	0.0004556	YOUNG-BIASED	KDM5B
-0.92	-4.58	0.0001078	0.001031	YOUNG-BIASED	ARHGEF16
-0.92	-5.47	1.072e-05	0.0002369	YOUNG-BIASED	RNF207
-0.92	-4.67	8.571e-05	0.0008853	YOUNG-BIASED	RAPGEF4
-0.92	-3.5	0.001741	0.007257	YOUNG-BIASED	LINC01248
-0.92	-3.42	0.002162	0.008508	YOUNG-BIASED	HOXD1
-0.92	-4.81	5.98e-05	0.0006982	YOUNG-BIASED	EOMES
-0.92	-3.23	0.003418	0.01195	YOUNG-BIASED	LEF1
-0.92	-5.3	1.661e-05	0.000309	YOUNG-BIASED	CTBP1
-0.92	-4.75	6.92e-05	0.0007714	YOUNG-BIASED	HTRA3
-0.92	-4.14	0.0003448	0.002261	YOUNG-BIASED	TMEM150C
-0.92	-4.63	9.505e-05	0.0009529	YOUNG-BIASED	PCDHGA5
-0.92	-5.11	2.716e-05	0.000418	YOUNG-BIASED	FBLL1
-0.92	-4.43	0.0001601	0.001342	YOUNG-BIASED	DLX6
-0.92	-6.53	7.369e-07	6.042e-05	YOUNG-BIASED	SPACA9
-0.92	-5.78	4.93e-06	0.0001502	YOUNG-BIASED	NELFB
-0.92	-3.52	0.001649	0.00698	YOUNG-BIASED	DOCK1
-0.92	-3.14	0.004246	0.01407	YOUNG-BIASED	FAM196A
-0.92	-6.59	6.311e-07	5.737e-05	YOUNG-BIASED	PACS1
-0.92	-2.69	0.01237	0.03201	YOUNG-BIASED	NAV3
-0.92	-5.82	4.403e-06	0.0001421	YOUNG-BIASED	AGAP2-AS1
-0.92	-4.26	0.0002528	0.00182	YOUNG-BIASED	GPR12
-0.92	-5.26	1.848e-05	0.00033	YOUNG-BIASED	MEGF11
-0.92	-3.32	0.002736	0.01011	YOUNG-BIASED	SNORD115-47
-0.92	-6	2.789e-06	0.0001133	YOUNG-BIASED	PDCD7
-0.92	-5.11	2.707e-05	0.0004174	YOUNG-BIASED	LINC01314
-0.92	-6.01	2.714e-06	0.0001118	YOUNG-BIASED	MAN2A2
-0.92	-5.92	3.437e-06	0.0001264	YOUNG-BIASED	BRD7
-0.92	-4.02	0.000465	0.002803	YOUNG-BIASED	IRX3
-0.92	-4.3	0.0002277	0.001688	YOUNG-BIASED	PLLP
-0.92	-6.02	2.644e-06	0.0001115	YOUNG-BIASED	ATMIN
-0.92	-6.24	1.513e-06	8.314e-05	YOUNG-BIASED	ZNF778
-0.92	-4.77	6.699e-05	0.0007555	YOUNG-BIASED	CRHR1
-0.92	-5.57	8.429e-06	0.0002035	YOUNG-BIASED	KLHL10
-0.92	-4.98	3.801e-05	0.000521	YOUNG-BIASED	CCR10
-0.92	-6.39	1.041e-06	6.874e-05	YOUNG-BIASED	MYCBPAP
-0.92	-4.38	0.0001807	0.001449	YOUNG-BIASED	SECTM1
-0.92	-4.59	0.0001072	0.001027	YOUNG-BIASED	ZNF532
-0.92	-5.19	2.247e-05	0.0003749	YOUNG-BIASED	TUBB4A
-0.92	-5.05	3.236e-05	0.0004675	YOUNG-BIASED	ISYNA1
-0.92	-4.63	9.576e-05	0.000956	YOUNG-BIASED	PTH2
-0.92	-5.62	7.432e-06	0.0001901	YOUNG-BIASED	SAMD10
-0.92	-5.59	7.987e-06	0.0001978	YOUNG-BIASED	LKAAEAR1
-0.92	-4.84	5.551e-05	0.0006651	YOUNG-BIASED	CACNG2
-0.92	-5.72	5.685e-06	0.0001644	YOUNG-BIASED	RANGAP1
-0.91	-2.88	0.007993	0.02288	YOUNG-BIASED	LINC01787
-0.91	-5.31	1.635e-05	0.0003063	YOUNG-BIASED	WRAP73
-0.91	-5.88	3.743e-06	0.0001315	YOUNG-BIASED	LOC440934
-0.91	-3.36	0.002464	0.009354	YOUNG-BIASED	TRIM71
-0.91	-5.57	8.453e-06	0.0002037	YOUNG-BIASED	UBE2E1-AS1
-0.91	-4.93	4.346e-05	0.0005654	YOUNG-BIASED	SCD5
-0.91	-4.16	0.0003251	0.002169	YOUNG-BIASED	NKX3-2
-0.91	-6.01	2.716e-06	0.0001118	YOUNG-BIASED	LOC100288152
-0.91	-4.05	0.0004272	0.002646	YOUNG-BIASED	IRX2
-0.91	-4.06	0.0004177	0.002599	YOUNG-BIASED	PITX1
-0.91	-5.3	1.678e-05	0.000311	YOUNG-BIASED	MIR4281
-0.91	-2.68	0.01281	0.03286	YOUNG-BIASED	NCOA7-AS1
-0.91	-4.94	4.311e-05	0.000562	YOUNG-BIASED	LINC00602
-0.91	-5.15	2.446e-05	0.000393	YOUNG-BIASED	GTF2IRD1
-0.91	-3.9	0.0006272	0.003463	YOUNG-BIASED	TCF24
-0.91	-5.71	5.809e-06	0.0001658	YOUNG-BIASED	ANKS6
-0.91	-3.06	0.00523	0.01643	YOUNG-BIASED	CLRN3
-0.91	-3.45	0.001984	0.007974	YOUNG-BIASED	PLEKHA7
-0.91	-4.89	4.797e-05	0.0006048	YOUNG-BIASED	PAX6
-0.91	-5.48	1.047e-05	0.000234	YOUNG-BIASED	FJX1
-0.91	-6	2.781e-06	0.0001131	YOUNG-BIASED	FKBP4
-0.91	-5.68	6.358e-06	0.0001757	YOUNG-BIASED	BRI3BP
-0.91	-4.02	0.0004641	0.002801	YOUNG-BIASED	MIR6763
-0.91	-3.43	0.002076	0.008249	YOUNG-BIASED	SNORD115-48
-0.91	-4.93	4.419e-05	0.0005711	YOUNG-BIASED	SCNN1G
-0.91	-6.08	2.275e-06	0.0001029	YOUNG-BIASED	GFER
-0.91	-7.12	1.737e-07	3.677e-05	YOUNG-BIASED	ZNF205
-0.91	-5.12	2.639e-05	0.0004123	YOUNG-BIASED	FA2H
-0.91	-3.96	0.0005465	0.003137	YOUNG-BIASED	MIR744
-0.91	-6.44	9.206e-07	6.448e-05	YOUNG-BIASED	GIT1
-0.91	-6.42	9.749e-07	6.652e-05	YOUNG-BIASED	KAT2A
-0.91	-4.65	8.995e-05	0.0009167	YOUNG-BIASED	MIR657
-0.91	-5.59	7.899e-06	0.0001967	YOUNG-BIASED	CDC34
-0.91	-3.65	0.001187	0.005469	YOUNG-BIASED	CACTIN-AS1
-0.91	-5.96	3.098e-06	0.0001201	YOUNG-BIASED	MRI1
-0.91	-5.19	2.257e-05	0.0003753	YOUNG-BIASED	SAMD1
-0.91	-5.69	6.196e-06	0.0001729	YOUNG-BIASED	MAP3K10
-0.91	-4.59	0.0001049	0.001012	YOUNG-BIASED	GIPR
-0.91	-5.09	2.895e-05	0.0004347	YOUNG-BIASED	GDAP1L1
-0.91	-3.49	0.001795	0.007413	YOUNG-BIASED	OLIG2
-0.91	-4.93	4.354e-05	0.0005654	YOUNG-BIASED	OLIG1
-0.91	-3.94	0.000568	0.003229	YOUNG-BIASED	CARD10
-0.9	-5.1	2.791e-05	0.0004259	YOUNG-BIASED	NTSR2
-0.9	-4.4	0.0001759	0.00142	YOUNG-BIASED	KCNK3
-0.9	-3.32	0.002723	0.01007	YOUNG-BIASED	MIR7704
-0.9	-4.88	4.97e-05	0.0006184	YOUNG-BIASED	CDK5R2
-0.9	-4.59	0.0001054	0.001016	YOUNG-BIASED	PTPRN
-0.9	-4.04	0.0004433	0.002711	YOUNG-BIASED	SLC38A3
-0.9	-3.85	0.000711	0.003805	YOUNG-BIASED	GATA2-AS1
-0.9	-2.48	0.02036	0.04726	YOUNG-BIASED	LINC01014
-0.9	-5.94	3.259e-06	0.0001229	YOUNG-BIASED	DCLK2
-0.9	-5.9	3.606e-06	0.0001297	YOUNG-BIASED	PP7080
-0.9	-4.23	0.0002685	0.001892	YOUNG-BIASED	LOC101927488
-0.9	-5.09	2.882e-05	0.0004334	YOUNG-BIASED	MYB
-0.9	-4.41	0.0001678	0.001381	YOUNG-BIASED	MAP7
-0.9	-5.16	2.433e-05	0.0003918	YOUNG-BIASED	HIPSTR
-0.9	-4.07	0.0004116	0.002575	YOUNG-BIASED	SIM1
-0.9	-3.36	0.002504	0.00947	YOUNG-BIASED	LOC285804
-0.9	-4.5	0.0001327	0.001182	YOUNG-BIASED	NRCAM
-0.9	-4.4	0.0001747	0.001414	YOUNG-BIASED	MIR335
-0.9	-4.38	0.0001818	0.001455	YOUNG-BIASED	PTPN3
-0.9	-4.58	0.0001085	0.001035	YOUNG-BIASED	ITIH5
-0.9	-4.31	0.0002193	0.001647	YOUNG-BIASED	MIR4685
-0.9	-5.51	9.789e-06	0.0002241	YOUNG-BIASED	FBXW8
-0.9	-6.55	7.125e-07	6.042e-05	YOUNG-BIASED	ZNF605
-0.9	-5.67	6.525e-06	0.0001791	YOUNG-BIASED	GGACT
-0.9	-4.04	0.000443	0.002711	YOUNG-BIASED	GJA3
-0.9	-5.62	7.308e-06	0.0001896	YOUNG-BIASED	DOCK9-AS2
-0.9	-5.07	3.064e-05	0.0004514	YOUNG-BIASED	SYNE2
-0.9	-2.89	0.007871	0.02261	YOUNG-BIASED	SNORD114-17
-0.9	-5.16	2.423e-05	0.0003918	YOUNG-BIASED	MYZAP
-0.9	-5.16	2.423e-05	0.0003918	YOUNG-BIASED	GCOM1
-0.9	-2.63	0.0144	0.03597	YOUNG-BIASED	SCARNA15
-0.9	-5.84	4.181e-06	0.0001378	YOUNG-BIASED	CDK5R1
-0.9	-3.82	0.0007829	0.00407	YOUNG-BIASED	THEG
-0.9	-6.33	1.227e-06	7.454e-05	YOUNG-BIASED	LMNB2
-0.9	-5.52	9.425e-06	0.0002191	YOUNG-BIASED	AES
-0.9	-3.47	0.001872	0.007647	YOUNG-BIASED	TBXA2R
-0.9	-5.89	3.721e-06	0.0001311	YOUNG-BIASED	SSBP4
-0.9	-5.9	3.595e-06	0.0001295	YOUNG-BIASED	GRWD1
-0.9	-5.6	7.77e-06	0.0001952	YOUNG-BIASED	STMN3
-0.9	-3.17	0.003982	0.01339	YOUNG-BIASED	MIR155
-0.9	-3.51	0.001692	0.007105	YOUNG-BIASED	GSC2
-0.9	-6.09	2.198e-06	0.0001016	YOUNG-BIASED	PATZ1
-0.9	-5.26	1.881e-05	0.000333	YOUNG-BIASED	MICALL1
-0.9	-4.79	6.341e-05	0.0007263	YOUNG-BIASED	SULT4A1
-0.89	-5.28	1.772e-05	0.0003213	YOUNG-BIASED	KIF26B
-0.89	-4.37	0.0001886	0.001487	YOUNG-BIASED	KCNQ4
-0.89	-3.91	0.0006141	0.003408	YOUNG-BIASED	SYT14
-0.89	-5.7	5.996e-06	0.00017	YOUNG-BIASED	AMIGO1
-0.89	-4.44	0.0001583	0.001332	YOUNG-BIASED	INSRR
-0.89	-5.3	1.655e-05	0.0003088	YOUNG-BIASED	ARL4C
-0.89	-3.28	0.003016	0.01089	YOUNG-BIASED	HAGLR
-0.89	-4.81	5.997e-05	0.0006987	YOUNG-BIASED	GRM2
-0.89	-4.42	0.0001651	0.00137	YOUNG-BIASED	TLL1
-0.89	-6.14	1.973e-06	9.552e-05	YOUNG-BIASED	DGKQ
-0.89	-5.54	9.006e-06	0.0002128	YOUNG-BIASED	CTBP1-AS2
-0.89	-3.61	0.001332	0.005953	YOUNG-BIASED	BMPR1B-AS1
-0.89	-3.96	0.0005471	0.003138	YOUNG-BIASED	PCDHGA6
-0.89	-3.04	0.005428	0.01693	YOUNG-BIASED	TLX3
-0.89	-5.54	9.077e-06	0.0002135	YOUNG-BIASED	LOC100288254
-0.89	-4.49	0.0001361	0.001204	YOUNG-BIASED	NRSN1
-0.89	-4.89	4.912e-05	0.0006127	YOUNG-BIASED	ITPR3
-0.89	-6.09	2.229e-06	0.000102	YOUNG-BIASED	PAQR8
-0.89	-3.9	0.00063	0.003475	YOUNG-BIASED	LIN28B-AS1
-0.89	-3.28	0.003012	0.01087	YOUNG-BIASED	PACRG-AS3
-0.89	-5.51	9.835e-06	0.0002244	YOUNG-BIASED	PHF10
-0.89	-5.61	7.498e-06	0.0001907	YOUNG-BIASED	HIPK2
-0.89	-5.39	1.343e-05	0.0002714	YOUNG-BIASED	TDRP
-0.89	-5.35	1.476e-05	0.0002887	YOUNG-BIASED	LGI3
-0.89	-5.26	1.882e-05	0.000333	YOUNG-BIASED	ASTN2
-0.89	-5.22	2.064e-05	0.0003528	YOUNG-BIASED	BSPRY
-0.89	-2.9	0.007678	0.0222	YOUNG-BIASED	LOC105375972
-0.89	-6.29	1.345e-06	7.783e-05	YOUNG-BIASED	PIP5KL1
-0.89	-5.51	9.872e-06	0.0002251	YOUNG-BIASED	NDOR1
-0.89	-5.36	1.444e-05	0.0002843	YOUNG-BIASED	CTBP2
-0.89	-3.15	0.004199	0.01395	YOUNG-BIASED	MSS51
-0.89	-3.18	0.003837	0.01302	YOUNG-BIASED	VAX1
-0.89	-5.75	5.314e-06	0.0001576	YOUNG-BIASED	NECTIN1
-0.89	-2.86	0.008486	0.02391	YOUNG-BIASED	WT1
-0.89	-2.87	0.008109	0.02312	YOUNG-BIASED	WT1-AS
-0.89	-5.36	1.434e-05	0.0002842	YOUNG-BIASED	MIR4487
-0.89	-4.93	4.351e-05	0.0005654	YOUNG-BIASED	BCL7A
-0.89	-5.49	1.03e-05	0.0002319	YOUNG-BIASED	FGF9
-0.89	-5.1	2.785e-05	0.0004255	YOUNG-BIASED	TMEM255B
-0.89	-4.1	0.000383	0.002442	YOUNG-BIASED	SYNDIG1L
-0.89	-3.52	0.001648	0.006979	YOUNG-BIASED	MIR1179
-0.89	-5.57	8.45e-06	0.0002037	YOUNG-BIASED	SIAH1
-0.89	-5.4	1.304e-05	0.0002662	YOUNG-BIASED	RNF213
-0.89	-6.28	1.377e-06	7.888e-05	YOUNG-BIASED	DHRS11
-0.89	-4.51	0.000131	0.001173	YOUNG-BIASED	GJC1
-0.89	-3.51	0.001716	0.007174	YOUNG-BIASED	TBX4
-0.89	-5.81	4.565e-06	0.0001439	YOUNG-BIASED	FOXJ1
-0.89	-4.69	8.166e-05	0.0008589	YOUNG-BIASED	ONECUT2
-0.89	-4.61	9.997e-05	0.0009822	YOUNG-BIASED	PLK5
-0.89	-3.47	0.001898	0.007718	YOUNG-BIASED	GIPC3
-0.89	-5.45	1.13e-05	0.0002441	YOUNG-BIASED	ATG4D
-0.89	-3.58	0.001445	0.006342	YOUNG-BIASED	PTGER1
-0.89	-4.79	6.24e-05	0.0007193	YOUNG-BIASED	BRD4
-0.89	-4.86	5.232e-05	0.0006392	YOUNG-BIASED	ZNF581
-0.89	-3.69	0.001095	0.005171	YOUNG-BIASED	TGIF2
-0.89	-3.07	0.005013	0.01592	YOUNG-BIASED	ERG
-0.89	-4.59	0.0001048	0.001012	YOUNG-BIASED	JAM2
-0.89	-5.02	3.44e-05	0.0004858	YOUNG-BIASED	CECR6
-0.88	-4.27	0.0002409	0.001756	YOUNG-BIASED	TAL1
-0.88	-4.37	0.0001864	0.001476	YOUNG-BIASED	MIR3679
-0.88	-5.85	4.121e-06	0.0001376	YOUNG-BIASED	ILKAP
-0.88	-5.95	3.174e-06	0.0001211	YOUNG-BIASED	LOC389199
-0.88	-4.46	0.0001499	0.001285	YOUNG-BIASED	PCDHGA3
-0.88	-4	0.0004927	0.002921	YOUNG-BIASED	C5orf66-AS1
-0.88	-4.96	4.02e-05	0.0005367	YOUNG-BIASED	SLC6A7
-0.88	-4.43	0.0001625	0.001355	YOUNG-BIASED	TMEM151B
-0.88	-4.86	5.225e-05	0.0006387	YOUNG-BIASED	LINC00473
-0.88	-5.4	1.295e-05	0.0002656	YOUNG-BIASED	LINC00092
-0.88	-5.49	1.031e-05	0.0002319	YOUNG-BIASED	TMEM203
-0.88	-6.53	7.354e-07	6.042e-05	YOUNG-BIASED	ACBD7-DCLRE1CP1
-0.88	-6.53	7.354e-07	6.042e-05	YOUNG-BIASED	ACBD7
-0.88	-5.7	6.032e-06	0.0001704	YOUNG-BIASED	KCNH3
-0.88	-2.62	0.01476	0.03666	YOUNG-BIASED	LOC105370306
-0.88	-4.49	0.0001372	0.001209	YOUNG-BIASED	ADCY4
-0.88	-2.87	0.00825	0.02341	YOUNG-BIASED	SNORD113-1
-0.88	-5.32	1.592e-05	0.0003021	YOUNG-BIASED	UNKL
-0.88	-3.83	0.0007569	0.003977	YOUNG-BIASED	VPS9D1-AS1
-0.88	-6.15	1.894e-06	9.378e-05	YOUNG-BIASED	ASPHD1
-0.88	-4.06	0.0004218	0.002617	YOUNG-BIASED	SNORD111
-0.88	-5.83	4.299e-06	0.0001403	YOUNG-BIASED	FAM57A
-0.88	-6.04	2.539e-06	0.0001095	YOUNG-BIASED	MIR212
-0.88	-6.31	1.272e-06	7.564e-05	YOUNG-BIASED	ETV4
-0.88	-3.61	0.001311	0.005877	YOUNG-BIASED	MIR10A
-0.88	-4.09	0.0003898	0.002477	YOUNG-BIASED	DLX4
-0.88	-4.28	0.000235	0.001723	YOUNG-BIASED	MIR3065
-0.88	-4.29	0.0002295	0.001696	YOUNG-BIASED	MIR338
-0.88	-5.16	2.436e-05	0.000392	YOUNG-BIASED	FASN
-0.88	-6.52	7.633e-07	6.065e-05	YOUNG-BIASED	SLC44A2
-0.88	-5.31	1.62e-05	0.0003049	YOUNG-BIASED	MIER2
-0.88	-5.23	1.984e-05	0.0003434	YOUNG-BIASED	RASIP1
-0.88	-5.76	5.15e-06	0.0001535	YOUNG-BIASED	CENPB
-0.88	-2.81	0.009417	0.02589	YOUNG-BIASED	LINC01432
-0.88	-5.94	3.214e-06	0.0001219	YOUNG-BIASED	ZC3H7B
-0.87	-4.65	9.033e-05	0.0009192	YOUNG-BIASED	BMP8A
-0.87	-5.63	7.155e-06	0.0001878	YOUNG-BIASED	UCK2
-0.87	-5.26	1.852e-05	0.00033	YOUNG-BIASED	FBXO44
-0.87	-3.87	0.0006846	0.003698	YOUNG-BIASED	EPHA8
-0.87	-5.97	3.004e-06	0.0001181	YOUNG-BIASED	VWA3B
-0.87	-6.23	1.544e-06	8.399e-05	YOUNG-BIASED	NCK2
-0.87	-5.66	6.616e-06	0.0001803	YOUNG-BIASED	MREG
-0.87	-3.71	0.001025	0.004915	YOUNG-BIASED	WNT10A
-0.87	-4.17	0.0003192	0.002139	YOUNG-BIASED	SERPINE2
-0.87	-3.38	0.002367	0.009081	YOUNG-BIASED	CCDC54
-0.87	-4.79	6.369e-05	0.0007286	YOUNG-BIASED	LOC729870
-0.87	-5.1	2.826e-05	0.0004296	YOUNG-BIASED	SHROOM1
-0.87	-5.33	1.538e-05	0.0002959	YOUNG-BIASED	FGF18
-0.87	-3.88	0.0006738	0.003656	YOUNG-BIASED	SLC35D3
-0.87	-4.21	0.0002845	0.001971	YOUNG-BIASED	PODXL
-0.87	-4.23	0.0002669	0.001886	YOUNG-BIASED	JPH1
-0.87	-2.69	0.01256	0.03235	YOUNG-BIASED	MIR4662B
-0.87	-3.67	0.001137	0.005311	YOUNG-BIASED	LOC100128593
-0.87	-5.03	3.371e-05	0.0004792	YOUNG-BIASED	NSMF
-0.87	-4.97	3.909e-05	0.0005303	YOUNG-BIASED	SFRP5
-0.87	-3.37	0.002441	0.009293	YOUNG-BIASED	PKP3
-0.87	-5.65	6.818e-06	0.0001832	YOUNG-BIASED	APBB1
-0.87	-3.85	0.0007183	0.003832	YOUNG-BIASED	ADAMTS8
-0.87	-5.26	1.851e-05	0.00033	YOUNG-BIASED	LRRC56
-0.87	-6.68	5.164e-07	5.151e-05	YOUNG-BIASED	AP2A2
-0.87	-5.25	1.89e-05	0.0003331	YOUNG-BIASED	MIR129-2
-0.87	-6.27	1.427e-06	8.003e-05	YOUNG-BIASED	KLC2
-0.87	-4.97	3.984e-05	0.0005338	YOUNG-BIASED	DHH
-0.87	-5.07	3.072e-05	0.0004517	YOUNG-BIASED	B3GLCT
-0.87	-4.06	0.0004179	0.002599	YOUNG-BIASED	GRTP1
-0.87	-5.35	1.478e-05	0.0002888	YOUNG-BIASED	CCDC85C
-0.87	-5.35	1.458e-05	0.0002867	YOUNG-BIASED	HHIPL1
-0.87	-5.17	2.319e-05	0.0003832	YOUNG-BIASED	CEP170B
-0.87	-6.72	4.58e-07	4.982e-05	YOUNG-BIASED	BTBD6
-0.87	-4.51	0.0001321	0.001179	YOUNG-BIASED	ISL2
-0.87	-4.88	5.037e-05	0.0006245	YOUNG-BIASED	LOC105371049
-0.87	-4.83	5.715e-05	0.0006782	YOUNG-BIASED	LLGL2
-0.87	-4.87	5.165e-05	0.0006349	YOUNG-BIASED	CNTNAP1
-0.87	-5.23	1.995e-05	0.0003449	YOUNG-BIASED	CA4
-0.87	-5.26	1.838e-05	0.0003298	YOUNG-BIASED	RNF157-AS1
-0.87	-5.96	3.096e-06	0.0001201	YOUNG-BIASED	MRPL12
-0.87	-3.41	0.002171	0.008535	YOUNG-BIASED	NFATC1
-0.87	-5.31	1.644e-05	0.0003074	YOUNG-BIASED	ZNF833P
-0.87	-6.32	1.242e-06	7.454e-05	YOUNG-BIASED	CPT1C
-0.87	-5.52	9.417e-06	0.0002191	YOUNG-BIASED	ZIM2-AS1
-0.87	-3.94	0.0005706	0.003237	YOUNG-BIASED	ZNF556
-0.87	-4.39	0.0001786	0.001437	YOUNG-BIASED	MIR4322
-0.87	-5.71	5.788e-06	0.0001654	YOUNG-BIASED	CDC25B
-0.87	-5.41	1.25e-05	0.0002595	YOUNG-BIASED	SS18L1
-0.87	-5.62	7.343e-06	0.00019	YOUNG-BIASED	CHAF1B
-0.87	-4.9	4.712e-05	0.000597	YOUNG-BIASED	GP1BB
-0.87	-3.36	0.002462	0.009351	YOUNG-BIASED	SOX10
-0.87	-5.11	2.711e-05	0.0004178	YOUNG-BIASED	PDGFB
-0.87	-4.15	0.0003299	0.002191	YOUNG-BIASED	A4GALT
-0.86	-5.93	3.336e-06	0.0001243	YOUNG-BIASED	KCNC4
-0.86	-2.77	0.01031	0.0277	YOUNG-BIASED	LINC01037
-0.86	-5.14	2.548e-05	0.0004038	YOUNG-BIASED	SUSD4
-0.86	-6.44	9.138e-07	6.436e-05	YOUNG-BIASED	EFHD2
-0.86	-5.98	2.913e-06	0.0001162	YOUNG-BIASED	KCNC4-AS1
-0.86	-4.67	8.512e-05	0.0008818	YOUNG-BIASED	VANGL1
-0.86	-6.63	5.74e-07	5.514e-05	YOUNG-BIASED	OAZ3
-0.86	-3.75	0.0009273	0.004559	YOUNG-BIASED	GJC2
-0.86	-3.77	0.0008748	0.004391	YOUNG-BIASED	WIPF1
-0.86	-3.91	0.0006235	0.003447	YOUNG-BIASED	MYCNOS
-0.86	-3.4	0.002234	0.008714	YOUNG-BIASED	C1GALT1C1L
-0.86	-5.14	2.531e-05	0.0004022	YOUNG-BIASED	DOCK3
-0.86	-4.6	0.0001031	0.001001	YOUNG-BIASED	MYRIP
-0.86	-5.91	3.549e-06	0.0001285	YOUNG-BIASED	ZNF35
-0.86	-4.08	0.0003988	0.002516	YOUNG-BIASED	IGF2BP2
-0.86	-5.6	7.682e-06	0.0001932	YOUNG-BIASED	ZKSCAN7
-0.86	-6.07	2.328e-06	0.0001042	YOUNG-BIASED	AFAP1
-0.86	-3.78	0.0008619	0.004349	YOUNG-BIASED	LINC01096
-0.86	-4.24	0.0002612	0.00186	YOUNG-BIASED	RPS6KA2
-0.86	-3.1	0.004761	0.01529	YOUNG-BIASED	ZC3HAV1L
-0.86	-3.67	0.00115	0.005349	YOUNG-BIASED	KCNS2
-0.86	-3.07	0.00511	0.01615	YOUNG-BIASED	PRRX2
-0.86	-5.68	6.327e-06	0.0001752	YOUNG-BIASED	SNORA17A
-0.86	-4.6	0.0001024	0.0009965	YOUNG-BIASED	SYN1
-0.86	-3.62	0.001296	0.005829	YOUNG-BIASED	PAUPAR
-0.86	-6.56	6.806e-07	5.962e-05	YOUNG-BIASED	GDPD5
-0.86	-5.59	7.888e-06	0.0001966	YOUNG-BIASED	PANO1
-0.86	-3.78	0.0008528	0.00432	YOUNG-BIASED	TNNT3
-0.86	-3.54	0.001586	0.006779	YOUNG-BIASED	MIR3973
-0.86	-3.33	0.002651	0.009884	YOUNG-BIASED	COLCA1
-0.86	-4.79	6.244e-05	0.0007194	YOUNG-BIASED	KMT2D
-0.86	-4.21	0.0002867	0.001981	YOUNG-BIASED	NTF3
-0.86	-4.33	0.0002075	0.001589	YOUNG-BIASED	POU4F1
-0.86	-3.33	0.002708	0.01003	YOUNG-BIASED	GPC5-AS2
-0.86	-4.66	8.8e-05	0.0009005	YOUNG-BIASED	SNRPN
-0.86	-5.92	3.434e-06	0.0001264	YOUNG-BIASED	CYFIP1
-0.86	-4.57	0.000113	0.001061	YOUNG-BIASED	GRAMD2
-0.86	-5.76	5.087e-06	0.0001523	YOUNG-BIASED	CMTM4
-0.86	-5.13	2.606e-05	0.0004094	YOUNG-BIASED	SYNGR3
-0.86	-5.27	1.789e-05	0.0003237	YOUNG-BIASED	TGFB1I1
-0.86	-5.78	4.943e-06	0.0001502	YOUNG-BIASED	DOK4
-0.86	-5.46	1.107e-05	0.0002404	YOUNG-BIASED	ZNF319
-0.86	-5.47	1.074e-05	0.0002371	YOUNG-BIASED	DBNDD1
-0.86	-4.32	0.0002163	0.001633	YOUNG-BIASED	WNT9B
-0.86	-5.43	1.206e-05	0.0002547	YOUNG-BIASED	GPS2
-0.86	-4.48	0.0001428	0.001243	YOUNG-BIASED	TNK1
-0.86	-6.21	1.66e-06	8.773e-05	YOUNG-BIASED	RUNDC1
-0.86	-6.06	2.369e-06	0.0001052	YOUNG-BIASED	PRDX2
-0.86	-4.14	0.0003387	0.002234	YOUNG-BIASED	HOMER3
-0.86	-5.25	1.927e-05	0.0003374	YOUNG-BIASED	APLP1
-0.86	-4.74	7.082e-05	0.0007843	YOUNG-BIASED	NOL4L
-0.86	-3.65	0.00119	0.005478	YOUNG-BIASED	DLGAP4-AS1
-0.86	-3.81	0.0008067	0.004146	YOUNG-BIASED	ANKRD60
-0.86	-3.73	0.0009731	0.004729	YOUNG-BIASED	KLHDC7B
-0.86	-4.59	0.0001067	0.001025	YOUNG-BIASED	LOC105373021
-0.86	-3.83	0.0007661	0.004013	YOUNG-BIASED	TEX33
-0.85	-4.26	0.0002482	0.001794	YOUNG-BIASED	EPHB2
-0.85	-4.27	0.0002434	0.00177	YOUNG-BIASED	GNG4
-0.85	-4.59	0.0001049	0.001012	YOUNG-BIASED	GPR153
-0.85	-3.59	0.001396	0.006174	YOUNG-BIASED	RBP7
-0.85	-4.13	0.0003472	0.00227	YOUNG-BIASED	HECW2
-0.85	-5.23	1.998e-05	0.000345	YOUNG-BIASED	LONRF2
-0.85	-3.66	0.001156	0.005371	YOUNG-BIASED	TLX2
-0.85	-2.84	0.008877	0.02474	YOUNG-BIASED	MAL
-0.85	-5.71	5.91e-06	0.000168	YOUNG-BIASED	DUSP2
-0.85	-3.01	0.005837	0.0179	YOUNG-BIASED	WDR49
-0.85	-5.51	9.806e-06	0.0002241	YOUNG-BIASED	ZNF660
-0.85	-3.44	0.002026	0.008105	YOUNG-BIASED	TRPC3
-0.85	-5.89	3.727e-06	0.0001311	YOUNG-BIASED	GALNT7
-0.85	-4.3	0.0002272	0.001686	YOUNG-BIASED	LGI2
-0.85	-3.93	0.0005817	0.00328	YOUNG-BIASED	C5orf38
-0.85	-4.7	8.061e-05	0.0008503	YOUNG-BIASED	CPNE5
-0.85	-4.79	6.314e-05	0.000725	YOUNG-BIASED	PM20D2
-0.85	-3.56	0.001503	0.00652	YOUNG-BIASED	BVES
-0.85	-4.18	0.000311	0.0021	YOUNG-BIASED	HOXA-AS3
-0.85	-5.36	1.434e-05	0.0002842	YOUNG-BIASED	BMP1
-0.85	-5.98	2.97e-06	0.0001175	YOUNG-BIASED	TONSL
-0.85	-5.68	6.325e-06	0.0001752	YOUNG-BIASED	GBGT1
-0.85	-6.51	7.867e-07	6.138e-05	YOUNG-BIASED	SDCCAG3
-0.85	-6.45	9.037e-07	6.408e-05	YOUNG-BIASED	PMPCA
-0.85	-4.42	0.0001628	0.001357	YOUNG-BIASED	TMEM151A
-0.85	-3.65	0.001202	0.005522	YOUNG-BIASED	RASSF10
-0.85	-6.54	7.291e-07	6.042e-05	YOUNG-BIASED	MAP4K2
-0.85	-4.96	4.006e-05	0.0005359	YOUNG-BIASED	SYT12
-0.85	-5.38	1.361e-05	0.0002746	YOUNG-BIASED	CORO1B
-0.85	-5.74	5.459e-06	0.0001603	YOUNG-BIASED	RNF214
-0.85	-3.72	0.0009934	0.004806	YOUNG-BIASED	ROBO3
-0.85	-4.46	0.0001498	0.001285	YOUNG-BIASED	RIMKLB
-0.85	-3.67	0.001129	0.005286	YOUNG-BIASED	CLEC7A
-0.85	-2.92	0.007226	0.02114	YOUNG-BIASED	MIR19A
-0.85	-4.01	0.0004807	0.002867	YOUNG-BIASED	FAM177A1
-0.85	-6.09	2.217e-06	0.0001018	YOUNG-BIASED	REM2
-0.85	-3.89	0.0006532	0.003572	YOUNG-BIASED	GPHB5
-0.85	-5.02	3.466e-05	0.0004883	YOUNG-BIASED	AKAP5
-0.85	-4.42	0.0001669	0.001378	YOUNG-BIASED	MMP15
-0.85	-5.47	1.08e-05	0.0002377	YOUNG-BIASED	CLCN7
-0.85	-6.02	2.632e-06	0.0001112	YOUNG-BIASED	DYNC1LI2
-0.85	-6.05	2.458e-06	0.0001076	YOUNG-BIASED	LOC106699570
-0.85	-5.94	3.233e-06	0.0001225	YOUNG-BIASED	RTN4RL1
-0.85	-6.17	1.798e-06	9.08e-05	YOUNG-BIASED	PTGES3L-AARSD1
-0.85	-6.17	1.798e-06	9.08e-05	YOUNG-BIASED	PTGES3L
-0.85	-3.78	0.0008537	0.004323	YOUNG-BIASED	HOXB8
-0.85	-2.69	0.01238	0.03202	YOUNG-BIASED	GALNT1
-0.85	-3.2	0.003656	0.01256	YOUNG-BIASED	SNORD58C
-0.85	-5.25	1.896e-05	0.0003333	YOUNG-BIASED	GNG7
-0.85	-3.25	0.003275	0.01158	YOUNG-BIASED	CPAMD8
-0.85	-3.69	0.001092	0.005163	YOUNG-BIASED	ZNF540
-0.85	-3.71	0.001019	0.004891	YOUNG-BIASED	LINC01480
-0.85	-5.76	5.085e-06	0.0001523	YOUNG-BIASED	PTOV1
-0.85	-3.21	0.003572	0.01235	YOUNG-BIASED	ADRA1D
-0.85	-3.76	0.0009114	0.004504	YOUNG-BIASED	LRRC3
-0.84	-4.82	5.803e-05	0.0006853	YOUNG-BIASED	PTPRU
-0.84	-4.69	8.171e-05	0.0008589	YOUNG-BIASED	NAV1
-0.84	-6.09	2.204e-06	0.0001017	YOUNG-BIASED	TP73-AS1
-0.84	-5.07	3.042e-05	0.0004491	YOUNG-BIASED	FAM131C
-0.84	-5.53	9.193e-06	0.0002154	YOUNG-BIASED	ZNF362
-0.84	-6.46	8.861e-07	6.364e-05	YOUNG-BIASED	LOC101928120
-0.84	-4.85	5.338e-05	0.0006473	YOUNG-BIASED	KLHL29
-0.84	-4.49	0.0001381	0.001215	YOUNG-BIASED	PPP1R1C
-0.84	-4.85	5.333e-05	0.0006473	YOUNG-BIASED	KCMF1
-0.84	-5.8	4.639e-06	0.0001448	YOUNG-BIASED	MIR153-1
-0.84	-3.77	0.0008868	0.004428	YOUNG-BIASED	MSL3P1
-0.84	-4.97	3.967e-05	0.0005333	YOUNG-BIASED	NUP210
-0.84	-3.39	0.00232	0.008944	YOUNG-BIASED	MIR8053
-0.84	-2.48	0.02028	0.04711	YOUNG-BIASED	HPGDS
-0.84	-6.02	2.659e-06	0.0001115	YOUNG-BIASED	EXOC3-AS1
-0.84	-6	2.807e-06	0.0001138	YOUNG-BIASED	EXOC3
-0.84	-3.53	0.001613	0.006867	YOUNG-BIASED	PCDHB6
-0.84	-3.79	0.0008387	0.004267	YOUNG-BIASED	PCDHB7
-0.84	-6.73	4.545e-07	4.967e-05	YOUNG-BIASED	RPP21
-0.84	-5.95	3.168e-06	0.0001211	YOUNG-BIASED	PCOLCE-AS1
-0.84	-5.28	1.749e-05	0.0003188	YOUNG-BIASED	VGF
-0.84	-3.92	0.0006003	0.003351	YOUNG-BIASED	ASAP1
-0.84	-5.08	2.935e-05	0.000439	YOUNG-BIASED	GNG10
-0.84	-6.38	1.085e-06	7.059e-05	YOUNG-BIASED	LOC100507346
-0.84	-4.01	0.0004753	0.002842	YOUNG-BIASED	AGPAT2
-0.84	-4.81	5.935e-05	0.0006949	YOUNG-BIASED	NEURL1
-0.84	-3.69	0.001069	0.005072	YOUNG-BIASED	SCT
-0.84	-5.57	8.335e-06	0.000203	YOUNG-BIASED	PDDC1
-0.84	-5.69	6.222e-06	0.0001732	YOUNG-BIASED	PCSK7
-0.84	-5.49	1.016e-05	0.0002295	YOUNG-BIASED	ASIC1
-0.84	-5.62	7.423e-06	0.0001901	YOUNG-BIASED	SLC48A1
-0.84	-3.36	0.002459	0.009343	YOUNG-BIASED	HOXC12
-0.84	-5.54	8.921e-06	0.0002118	YOUNG-BIASED	SERP2
-0.84	-4.09	0.0003863	0.002457	YOUNG-BIASED	ZDHHC22
-0.84	-4.49	0.0001365	0.001204	YOUNG-BIASED	DAPK2
-0.84	-5.01	3.561e-05	0.0004973	YOUNG-BIASED	PAK6
-0.84	-6.27	1.419e-06	7.977e-05	YOUNG-BIASED	SLC30A4
-0.84	-3.75	0.0009311	0.004574	YOUNG-BIASED	RBPMS2
-0.84	-4.99	3.742e-05	0.0005157	YOUNG-BIASED	ZNF423
-0.84	-4.82	5.884e-05	0.0006913	YOUNG-BIASED	USB1
-0.84	-4.36	0.0001923	0.001503	YOUNG-BIASED	RAB11FIP4
-0.84	-6	2.819e-06	0.000114	YOUNG-BIASED	CYB561
-0.84	-4.64	9.259e-05	0.0009356	YOUNG-BIASED	SYNGR2
-0.84	-4.23	0.000271	0.001904	YOUNG-BIASED	SGSH
-0.84	-4.23	0.000271	0.001904	YOUNG-BIASED	SLC26A11
-0.84	-3.77	0.0008863	0.004427	YOUNG-BIASED	SLC7A10
-0.84	-4.32	0.0002125	0.001615	YOUNG-BIASED	ETV2
-0.84	-4.54	0.0001221	0.001119	YOUNG-BIASED	GGN
-0.84	-4.95	4.162e-05	0.0005484	YOUNG-BIASED	CADM4
-0.84	-3.6	0.00136	0.006053	YOUNG-BIASED	LOC100130587
-0.84	-6.04	2.511e-06	0.0001087	YOUNG-BIASED	PLAGL2
-0.84	-3.81	0.0007879	0.004087	YOUNG-BIASED	LRRC3-AS1
-0.84	-5.92	3.443e-06	0.0001264	YOUNG-BIASED	SBF1
-0.83	-3.87	0.0006905	0.003725	YOUNG-BIASED	TRABD2B
-0.83	-3.56	0.001499	0.00651	YOUNG-BIASED	TNFRSF4
-0.83	-5.64	7.029e-06	0.0001864	YOUNG-BIASED	SDF4
-0.83	-4.03	0.0004474	0.00273	YOUNG-BIASED	ANKRD65
-0.83	-3.19	0.003787	0.01289	YOUNG-BIASED	SNORD21
-0.83	-4.53	0.0001255	0.001135	YOUNG-BIASED	MIR9-1
-0.83	-2.46	0.02125	0.0489	YOUNG-BIASED	MIR3122
-0.83	-4.92	4.543e-05	0.0005827	YOUNG-BIASED	MBOAT2
-0.83	-5.52	9.529e-06	0.0002201	YOUNG-BIASED	THOC7
-0.83	-3.13	0.004389	0.01441	YOUNG-BIASED	MIR548AY
-0.83	-3.8	0.0008252	0.004214	YOUNG-BIASED	GPR27
-0.83	-4.87	5.081e-05	0.0006282	YOUNG-BIASED	MIR3684
-0.83	-4.98	3.803e-05	0.000521	YOUNG-BIASED	MCIDAS
-0.83	-4.33	0.0002084	0.001593	YOUNG-BIASED	LHFPL5
-0.83	-3.99	0.0005058	0.002974	YOUNG-BIASED	LOC100505530
-0.83	-3.96	0.000536	0.0031	YOUNG-BIASED	MIR1236
-0.83	-3.49	0.001813	0.007466	YOUNG-BIASED	IGF2BP3
-0.83	-3.93	0.0005904	0.003309	YOUNG-BIASED	SMO
-0.83	-5.73	5.539e-06	0.0001624	YOUNG-BIASED	COPG2
-0.83	-4.47	0.0001445	0.001254	YOUNG-BIASED	C9orf50
-0.83	-3.07	0.005015	0.01593	YOUNG-BIASED	CELP
-0.83	-3.75	0.0009403	0.004605	YOUNG-BIASED	CLIC3
-0.83	-5.47	1.09e-05	0.0002387	YOUNG-BIASED	KCNIP2
-0.83	-5.48	1.058e-05	0.0002349	YOUNG-BIASED	LOC171391
-0.83	-3.86	0.0007075	0.003793	YOUNG-BIASED	B4GALNT3
-0.83	-2.89	0.007807	0.02248	YOUNG-BIASED	CLEC4D
-0.83	-3.34	0.002632	0.009835	YOUNG-BIASED	SMCO3
-0.83	-6.07	2.31e-06	0.0001039	YOUNG-BIASED	ANKRD52
-0.83	-3.7	0.001046	0.004992	YOUNG-BIASED	FLT3
-0.83	-3.35	0.00253	0.009549	YOUNG-BIASED	MLNR
-0.83	-4.84	5.464e-05	0.0006559	YOUNG-BIASED	HAGHL
-0.83	-5.52	9.431e-06	0.0002191	YOUNG-BIASED	MIR1225
-0.83	-4	0.0004889	0.002902	YOUNG-BIASED	BAHCC1
-0.83	-4.51	0.0001308	0.001172	YOUNG-BIASED	MEOX1
-0.83	-3.68	0.001121	0.00526	YOUNG-BIASED	TMEM235
-0.83	-6.04	2.507e-06	0.0001087	YOUNG-BIASED	CCDC40
-0.83	-3.38	0.002346	0.009021	YOUNG-BIASED	MIR320C1
-0.83	-3.67	0.001147	0.005339	YOUNG-BIASED	SKOR2
-0.83	-3.89	0.0006464	0.003544	YOUNG-BIASED	KISS1R
-0.83	-4.6	0.0001039	0.001006	YOUNG-BIASED	KLF16
-0.83	-4.46	0.0001505	0.001288	YOUNG-BIASED	TM6SF2
-0.83	-6.37	1.106e-06	7.148e-05	YOUNG-BIASED	TMEM147
-0.83	-4.88	4.949e-05	0.0006167	YOUNG-BIASED	COX7A1
-0.83	-4.22	0.0002787	0.001942	YOUNG-BIASED	LOC644189
-0.83	-4.03	0.0004583	0.002778	YOUNG-BIASED	SPRED3
-0.83	-5.22	2.087e-05	0.0003557	YOUNG-BIASED	LMTK3
-0.83	-6.06	2.374e-06	0.0001052	YOUNG-BIASED	POFUT1
-0.83	-2.85	0.008517	0.02398	YOUNG-BIASED	PREX1
-0.83	-4.77	6.581e-05	0.0007453	YOUNG-BIASED	LINC01664
-0.83	-4.82	5.861e-05	0.0006892	YOUNG-BIASED	RTN4R
-0.82	-4.97	3.929e-05	0.0005313	YOUNG-BIASED	CELF3
-0.82	-5.2	2.196e-05	0.0003692	YOUNG-BIASED	KIF5C
-0.82	-5.14	2.557e-05	0.0004043	YOUNG-BIASED	CHN1
-0.82	-4.44	0.0001566	0.001323	YOUNG-BIASED	CMPK2
-0.82	-3.17	0.003931	0.01326	YOUNG-BIASED	HOXD13
-0.82	-4.53	0.0001236	0.001125	YOUNG-BIASED	LINC01117
-0.82	-3.86	0.0007034	0.003775	YOUNG-BIASED	MECOM
-0.82	-4.14	0.0003393	0.002235	YOUNG-BIASED	LHFPL4
-0.82	-4.63	9.497e-05	0.0009526	YOUNG-BIASED	ACVR2B-AS1
-0.82	-3.57	0.001456	0.006376	YOUNG-BIASED	SOX2
-0.82	-5.2	2.153e-05	0.0003635	YOUNG-BIASED	NSD2
-0.82	-4.75	6.973e-05	0.0007761	YOUNG-BIASED	GLRB
-0.82	-4.35	0.0001978	0.001532	YOUNG-BIASED	NSG1
-0.82	-3.72	0.00101	0.004861	YOUNG-BIASED	SLC10A4
-0.82	-4.93	4.345e-05	0.0005654	YOUNG-BIASED	FSTL4
-0.82	-5.6	7.792e-06	0.0001952	YOUNG-BIASED	GABBR1
-0.82	-3.55	0.001563	0.006713	YOUNG-BIASED	POU3F2
-0.82	-5.77	5.054e-06	0.0001518	YOUNG-BIASED	UBE3C
-0.82	-6.07	2.335e-06	0.0001044	YOUNG-BIASED	SLC37A3
-0.82	-5.59	7.843e-06	0.0001958	YOUNG-BIASED	ARHGAP39
-0.82	-2.67	0.01324	0.03368	YOUNG-BIASED	SMIM18
-0.82	-5.68	6.362e-06	0.0001757	YOUNG-BIASED	SCRIB
-0.82	-4.74	7.124e-05	0.0007861	YOUNG-BIASED	RAPGEF1
-0.82	-5.5	9.9e-06	0.0002255	YOUNG-BIASED	UCK1
-0.82	-6.1	2.148e-06	0.0001003	YOUNG-BIASED	RALGDS
-0.82	-5.77	5.007e-06	0.0001514	YOUNG-BIASED	C9orf142
-0.82	-4.73	7.33e-05	0.0007992	YOUNG-BIASED	DHRSX
-0.82	-4.74	7.194e-05	0.0007909	YOUNG-BIASED	ZBED1
-0.82	-4.21	0.0002868	0.001982	YOUNG-BIASED	LOXL4
-0.82	-5.85	4.13e-06	0.0001376	YOUNG-BIASED	GLRX3
-0.82	-3.27	0.003127	0.01119	YOUNG-BIASED	LOC101927120
-0.82	-3.83	0.0007603	0.003991	YOUNG-BIASED	CLEC1B
-0.82	-5.89	3.716e-06	0.0001311	YOUNG-BIASED	GDF11
-0.82	-2.78	0.01015	0.02739	YOUNG-BIASED	LOC101927284
-0.82	-4.02	0.0004709	0.002827	YOUNG-BIASED	GSX1
-0.82	-5.19	2.218e-05	0.000372	YOUNG-BIASED	CPNE6
-0.82	-3.84	0.0007398	0.003912	YOUNG-BIASED	CHGA
-0.82	-5.23	2.003e-05	0.0003453	YOUNG-BIASED	CHST14
-0.82	-4.67	8.627e-05	0.0008884	YOUNG-BIASED	DNAJA4
-0.82	-4.61	0.0001009	0.0009882	YOUNG-BIASED	PRKCB
-0.82	-4.86	5.2e-05	0.0006368	YOUNG-BIASED	NKD1
-0.82	-4.57	0.0001106	0.001049	YOUNG-BIASED	RHBDF1
-0.82	-5.62	7.431e-06	0.0001901	YOUNG-BIASED	MIR132
-0.82	-4.33	0.0002088	0.001595	YOUNG-BIASED	MMP28
-0.82	-5.02	3.463e-05	0.0004883	YOUNG-BIASED	NT5C3B
-0.82	-5.12	2.65e-05	0.0004131	YOUNG-BIASED	KCNH4
-0.82	-4.28	0.0002399	0.00175	YOUNG-BIASED	METRNL
-0.82	-3.62	0.001287	0.005798	YOUNG-BIASED	MIR4321
-0.82	-6.11	2.111e-06	9.894e-05	YOUNG-BIASED	TMEM147-AS1
-0.82	-3.78	0.0008681	0.004369	YOUNG-BIASED	GPR4
-0.82	-5.6	7.789e-06	0.0001952	YOUNG-BIASED	LINC01521
-0.81	-4	0.0004946	0.002928	YOUNG-BIASED	PLEKHN1
-0.81	-4.33	0.0002094	0.001599	YOUNG-BIASED	NKAIN1
-0.81	-5.38	1.37e-05	0.0002761	YOUNG-BIASED	NES
-0.81	-2.86	0.008485	0.02391	YOUNG-BIASED	LINC01247
-0.81	-3.94	0.0005778	0.003269	YOUNG-BIASED	LOC102724849
-0.81	-4.7	7.883e-05	0.0008388	YOUNG-BIASED	LRRC3B
-0.81	-2.91	0.007533	0.02187	YOUNG-BIASED	LINC00698
-0.81	-5.72	5.652e-06	0.0001641	YOUNG-BIASED	TOPBP1
-0.81	-3.98	0.0005111	0.002997	YOUNG-BIASED	FAM169A
-0.81	-5.66	6.557e-06	0.0001794	YOUNG-BIASED	RING1
-0.81	-5.6	7.673e-06	0.0001932	YOUNG-BIASED	B3GALT4
-0.81	-2.81	0.009335	0.0257	YOUNG-BIASED	OPN5
-0.81	-3.47	0.001887	0.00769	YOUNG-BIASED	BVES-AS1
-0.81	-5.17	2.321e-05	0.0003832	YOUNG-BIASED	MTURN
-0.81	-4.45	0.0001521	0.001298	YOUNG-BIASED	EGR3
-0.81	-2.65	0.01376	0.03473	YOUNG-BIASED	MIR4662A
-0.81	-4.13	0.0003522	0.002296	YOUNG-BIASED	CNTFR
-0.81	-3.48	0.001853	0.007593	YOUNG-BIASED	FOXB2
-0.81	-6.19	1.719e-06	8.902e-05	YOUNG-BIASED	ZMYND19
-0.81	-4.95	4.121e-05	0.0005443	YOUNG-BIASED	PWWP2B
-0.81	-3.68	0.001118	0.00525	YOUNG-BIASED	MIR3663HG
-0.81	-4.62	9.806e-05	0.000968	YOUNG-BIASED	CALY
-0.81	-3.59	0.0014	0.006185	YOUNG-BIASED	HOTS
-0.81	-4.95	4.117e-05	0.000544	YOUNG-BIASED	MIR130A
-0.81	-4.72	7.584e-05	0.0008166	YOUNG-BIASED	GRK2
-0.81	-3.64	0.001231	0.005619	YOUNG-BIASED	PIWIL4
-0.81	-4.24	0.00026	0.001855	YOUNG-BIASED	ABCG4
-0.81	-5.87	3.919e-06	0.0001344	YOUNG-BIASED	TBCEL
-0.81	-3.59	0.001395	0.006172	YOUNG-BIASED	TMEM132C
-0.81	-3.71	0.001024	0.00491	YOUNG-BIASED	RPSAP52
-0.81	-2.63	0.01448	0.03613	YOUNG-BIASED	PTPRB
-0.81	-4.24	0.0002617	0.001862	YOUNG-BIASED	USP44
-0.81	-2.79	0.009867	0.02682	YOUNG-BIASED	MIR20A
-0.81	-2.56	0.01696	0.04099	YOUNG-BIASED	SNORD114-14
-0.81	-2.78	0.01024	0.02757	YOUNG-BIASED	ASPG
-0.81	-3.08	0.004956	0.01579	YOUNG-BIASED	INF2
-0.81	-3.89	0.0006449	0.003541	YOUNG-BIASED	CPEB1
-0.81	-5.3	1.655e-05	0.0003088	YOUNG-BIASED	CRTC3
-0.81	-3.99	0.0004995	0.002946	YOUNG-BIASED	FAM174B
-0.81	-4.41	0.0001692	0.001388	YOUNG-BIASED	LRRC36
-0.81	-4.89	4.865e-05	0.000609	YOUNG-BIASED	PPM1E
-0.81	-4.91	4.63e-05	0.0005896	YOUNG-BIASED	FADS6
-0.81	-4.92	4.484e-05	0.000576	YOUNG-BIASED	HID1-AS1
-0.81	-3.73	0.000975	0.004735	YOUNG-BIASED	MADCAM1
-0.81	-4.33	0.000211	0.001608	YOUNG-BIASED	LOC100288123
-0.81	-6.37	1.089e-06	7.059e-05	YOUNG-BIASED	BTBD2
-0.81	-5.84	4.144e-06	0.0001378	YOUNG-BIASED	ZNF14
-0.81	-5.07	3.031e-05	0.0004486	YOUNG-BIASED	CCNE1
-0.81	-4.58	0.0001081	0.001033	YOUNG-BIASED	USF2
-0.81	-5.85	4.116e-06	0.0001376	YOUNG-BIASED	LZTS3
-0.81	-4.36	0.0001923	0.001503	YOUNG-BIASED	TMEM74B
-0.81	-4.57	0.0001118	0.001055	YOUNG-BIASED	DUSP15
-0.81	-4.64	9.281e-05	0.0009373	YOUNG-BIASED	KCNK15
-0.81	-3.11	0.004549	0.01479	YOUNG-BIASED	WFDC11
-0.81	-5.16	2.379e-05	0.0003894	YOUNG-BIASED	PSMA7
-0.81	-4.57	0.0001108	0.001049	YOUNG-BIASED	UMODL1-AS1
-0.81	-5.13	2.629e-05	0.0004117	YOUNG-BIASED	BRD1
-0.81	-5	3.679e-05	0.0005106	YOUNG-BIASED	ASPHD2
-0.81	-4.01	0.0004815	0.002871	YOUNG-BIASED	LIF
-0.81	-3.59	0.001386	0.006145	YOUNG-BIASED	RFPL3
-0.81	-4.32	0.0002157	0.00163	YOUNG-BIASED	PKDREJ
-0.8	-5.41	1.272e-05	0.0002624	YOUNG-BIASED	B3GALT6
-0.8	-5.57	8.28e-06	0.0002026	YOUNG-BIASED	SSU72
-0.8	-4.3	0.0002251	0.001677	YOUNG-BIASED	SMIM1
-0.8	-3.89	0.0006547	0.003577	YOUNG-BIASED	SCARNA1
-0.8	-3.55	0.001562	0.006711	YOUNG-BIASED	PDIA3P1
-0.8	-5.57	8.295e-06	0.0002028	YOUNG-BIASED	ADAM15
-0.8	-3.85	0.0007155	0.003822	YOUNG-BIASED	BLACAT1
-0.8	-5.54	9.142e-06	0.0002146	YOUNG-BIASED	MAPKAPK2
-0.8	-4.23	0.000271	0.001904	YOUNG-BIASED	ITM2C
-0.8	-5.86	4.028e-06	0.0001362	YOUNG-BIASED	GRHL1
-0.8	-5.85	4.072e-06	0.0001368	YOUNG-BIASED	ABI2
-0.8	-7.23	1.352e-07	3.413e-05	YOUNG-BIASED	OBSL1
-0.8	-3.38	0.002379	0.009118	YOUNG-BIASED	B3GNT7
-0.8	-4.71	7.696e-05	0.000823	YOUNG-BIASED	ZNF502
-0.8	-4.92	4.473e-05	0.0005754	YOUNG-BIASED	MIR4787
-0.8	-4.18	0.000308	0.002082	YOUNG-BIASED	SNORD19
-0.8	-4	0.000484	0.002883	YOUNG-BIASED	LINC01391
-0.8	-4.32	0.0002138	0.00162	YOUNG-BIASED	TMEM44
-0.8	-5.66	6.664e-06	0.0001812	YOUNG-BIASED	IDUA
-0.8	-3.33	0.00268	0.00996	YOUNG-BIASED	REST
-0.8	-2.58	0.01624	0.0396	YOUNG-BIASED	STATH
-0.8	-4.87	5.13e-05	0.000632	YOUNG-BIASED	NRG2
-0.8	-4.14	0.0003397	0.002236	YOUNG-BIASED	GFRA3
-0.8	-3.56	0.001506	0.00653	YOUNG-BIASED	ARSI
-0.8	-4.01	0.0004722	0.002832	YOUNG-BIASED	MYLK4
-0.8	-3.52	0.001667	0.00703	YOUNG-BIASED	FAXC
-0.8	-5.14	2.569e-05	0.0004056	YOUNG-BIASED	ARFGEF3
-0.8	-3.47	0.001886	0.007687	YOUNG-BIASED	MDFI
-0.8	-2.81	0.009551	0.02617	YOUNG-BIASED	POU6F2-AS2
-0.8	-3.63	0.001277	0.005769	YOUNG-BIASED	VSTM2A
-0.8	-4.27	0.000243	0.001767	YOUNG-BIASED	FZD6
-0.8	-5.9	3.56e-06	0.0001286	YOUNG-BIASED	TSNARE1
-0.8	-5.81	4.473e-06	0.0001424	YOUNG-BIASED	GLI4
-0.8	-5.7	6.041e-06	0.0001704	YOUNG-BIASED	HSF1
-0.8	-5.69	6.102e-06	0.0001714	YOUNG-BIASED	WDR5
-0.8	-3.53	0.001607	0.006848	YOUNG-BIASED	MIR6722
-0.8	-3.28	0.003047	0.01097	YOUNG-BIASED	PDZD4
-0.8	-5.17	2.358e-05	0.0003875	YOUNG-BIASED	LOC105369438
-0.8	-4.67	8.515e-05	0.0008818	YOUNG-BIASED	PTPRJ
-0.8	-3.5	0.001765	0.007326	YOUNG-BIASED	LINC01219
-0.8	-4.3	0.0002256	0.001678	YOUNG-BIASED	MMP17
-0.8	-3.99	0.0005056	0.002974	YOUNG-BIASED	SHISA2
-0.8	-4	0.0004847	0.002885	YOUNG-BIASED	PRKD1
-0.8	-5.57	8.414e-06	0.0002035	YOUNG-BIASED	CERNA1
-0.8	-4.5	0.0001346	0.001194	YOUNG-BIASED	LOXL1-AS1
-0.8	-4.98	3.83e-05	0.0005235	YOUNG-BIASED	LOC105371038
-0.8	-4.96	4.089e-05	0.0005421	YOUNG-BIASED	WDR90
-0.8	-4.96	4.078e-05	0.0005413	YOUNG-BIASED	GLIS2
-0.8	-6.25	1.482e-06	8.21e-05	YOUNG-BIASED	BCKDK
-0.8	-5.45	1.132e-05	0.0002441	YOUNG-BIASED	CHTF8
-0.8	-5.45	1.141e-05	0.0002453	YOUNG-BIASED	UTP4
-0.8	-3.49	0.001808	0.007454	YOUNG-BIASED	ABR
-0.8	-4.2	0.0002946	0.002018	YOUNG-BIASED	PITPNM3
-0.8	-2.68	0.01288	0.033	YOUNG-BIASED	OMG
-0.8	-5.8	4.596e-06	0.000144	YOUNG-BIASED	TBC1D16
-0.8	-3.77	0.0008814	0.004409	YOUNG-BIASED	PDE6G
-0.8	-3.77	0.0008886	0.004432	YOUNG-BIASED	SLC16A3
-0.8	-3.99	0.0004963	0.002936	YOUNG-BIASED	MMP24
-0.8	-5.25	1.884e-05	0.000333	YOUNG-BIASED	BCAS4
-0.8	-2.97	0.006383	0.0192	YOUNG-BIASED	NTSR1
-0.8	-5.09	2.863e-05	0.0004319	YOUNG-BIASED	SPEF1
-0.8	-4.49	0.0001384	0.001216	YOUNG-BIASED	TTLL9
-0.8	-4.41	0.000169	0.001387	YOUNG-BIASED	ZNF334
-0.8	-3.62	0.001301	0.005843	YOUNG-BIASED	HUNK
-0.79	-3.65	0.001184	0.005463	YOUNG-BIASED	HES4
-0.79	-4.09	0.0003921	0.002486	YOUNG-BIASED	NT5C1A
-0.79	-6.27	1.415e-06	7.967e-05	YOUNG-BIASED	PYGO2
-0.79	-5.04	3.269e-05	0.0004705	YOUNG-BIASED	AP1S3
-0.79	-3.13	0.004358	0.01434	YOUNG-BIASED	FAM150B
-0.79	-4.05	0.0004306	0.00266	YOUNG-BIASED	MYCN
-0.79	-3.98	0.0005219	0.003043	YOUNG-BIASED	TMEM178A
-0.79	-3.42	0.002164	0.008514	YOUNG-BIASED	LINC01159
-0.79	-4.25	0.0002571	0.001842	YOUNG-BIASED	CRYBA2
-0.79	-4.54	0.0001204	0.001107	YOUNG-BIASED	PP14571
-0.79	-3.24	0.00334	0.01175	YOUNG-BIASED	WNT7A
-0.79	-4.12	0.0003595	0.002331	YOUNG-BIASED	OXTR
-0.79	-4.64	9.363e-05	0.000943	YOUNG-BIASED	CPNE9
-0.79	-3.45	0.002004	0.008041	YOUNG-BIASED	ZIC1
-0.79	-4.75	7.018e-05	0.0007795	YOUNG-BIASED	TNK2
-0.79	-3.09	0.004828	0.01546	YOUNG-BIASED	GRIA2
-0.79	-4.83	5.676e-05	0.0006752	YOUNG-BIASED	CLGN
-0.79	-4.48	0.00014	0.001225	YOUNG-BIASED	CCNI2
-0.79	-3.36	0.002512	0.009495	YOUNG-BIASED	PCDHB16
-0.79	-3.62	0.001287	0.005798	YOUNG-BIASED	PCDHGB5
-0.79	-4.3	0.0002231	0.00167	YOUNG-BIASED	NDST1-AS1
-0.79	-3.19	0.003785	0.01289	YOUNG-BIASED	DCDC2
-0.79	-4.87	5.146e-05	0.0006333	YOUNG-BIASED	HMGA1
-0.79	-3.09	0.004876	0.01558	YOUNG-BIASED	TFAP2A-AS1
-0.79	-3.26	0.003157	0.01126	YOUNG-BIASED	LOC105377879
-0.79	-3.25	0.00327	0.01157	YOUNG-BIASED	NR2E1
-0.79	-4.97	3.925e-05	0.0005313	YOUNG-BIASED	JAZF1-AS1
[truncated: 9,855 more rows]

## Sheet: Region-Associated Genesets
FETALBIASED Regions – FETALBIASED Promoter Accessibility	ADULTBIASED Regions – ADULTBIASED Promoter Accessibility		FETALBIASED Regions – FETALBIASED Promoter Intersects	ADULTBIASED Regions – ADULTBIASED Promoter Intersects			Young-Adult Regions – Young-Adult Promoter Accessibility	Old-Adult Regions – Old-Adult Promoter Accessibility		Young-Adult Regions – Young-Adult Promoter Intersects	Old-Adult Regions – Old-Adult Promoter Intersects
ZFP36L1	C22orf34		BCL6	C22orf34			SNAI3	OR4N4		SNAI3	CCT8L2
BCL6	FAM19A5		ADAMTS1	PTX4			WDR24	NPAP1		SUN1	PSG9
ADAMTS1	GABBR2		MPDZ	NCF4			FBXL16	CCT8L2		RHOT2	PSG5
MPDZ	TELO2		MARCKS	SPACA7			JMJD8	NNMT		WDR24	CST1
MARCKS	PTX4		FGGY	CAMSAP3			PRKAR1B	KNTC1		FBXL16	TUBA3C
FGGY	TSNARE1		JUN	PVALB			TMCO3	RSRC2		STUB1	OR7D4
JUN	RHOT2		REV3L	CSF2RB			DCUN1D2	FKBP5		RHBDL1	TAF1L
REV3L	WDR24		ROR1	DGKQ			PDGFA	TNFRSF17		PRKAR1B	LPAR1
ROR1	FBXL16		ENOX1	SLC26A1			FAM20C	RBM47		TMCO3	TRIM60
ENOX1	JMJD8		LPP	MIOX			P2RX2	OR1G1		DCUN1D2	OR10W1
KCTD12	RHBDL1		KCTD12	AIPL1			SLCO4A1	MUC16		FAM20C	SLC30A5
GATA6	CLCN7		CGNL1	KCNG2			PIEZO1	HCAR3		PIEZO1	RFPL3S
RBPMS	NCF4		RBPMS	RGS12			ENDOV	HCAR2		RPL13	PLGRKT
ZNF608	SPACA7		ZNF608	FTCD			ADNP2	PSG9		STK32C	TMEM220
UCHL3	MOV10L1		UCHL3	TCL1A			SLC19A1	KIR2DL3		LRRC27	CPN1
COMMD6	LINGO3		COMMD6	TRPM1			TELO2	TMEM213		ENDOV	TMEM132B
SORBS1	GSG1L		SORBS1	LINC00955			SLC2A4RG	ATP6V0A4		F10	CDH9
ZNF704	BRD1		ZNF704	PADI4			SPG7	CPA6		ADNP2	IGSF6
ATXN1	CAMSAP3		ATXN1	CST2			LCNL1	PSG5		SLC2A4RG	AMZ2
EMILIN2	OR4M2		EMILIN2	ABHD16B			COL6A2	CST1		SPG7	SERBP1
SORBS2	PQLC1		SORBS2	CHID1			AP2A2	DOPEY2		COL6A2	KRTAP11-1
EXT1	PVALB		EXT1	ZNF280A			ZNF778	BCL6		AP2A2	WDR64
IGF1R	CSF2RB		IGF1R	SLC6A18			DIDO1	DOCK8		ZNF778	KRTAP13-4
HOXA5	CST5		SH2D4A	KIR2DL3			GID8	C9orf66		INTS1	IGSF22
HOXA3	MYL5		HOXA5	CCDC154			INTS1	KLHL24		SNX8	MC3R
TRAF3IP2	ATP5I		HOXA6	OR10H5			SNX8	TUBA3C		NOC4L	C8orf46
HES1	TEX33		TRAF3IP2	MAN2B2			EIF3B	MUC17		DDX51	TNFSF14
LURAP1L	BRD9		CT62	PRAME			NOC4L	LYZL2		ENGASE	CCR1
MYL12B	TRIP13		HES1	LL22NC03-63E9.3			DDX51	NBPF15		HN1L	SOHLH2
FZD1	IGSF21		LURAP1L	IGLL5			ENGASE	FETUB		FN3KRP	KRT33A
CSNK1A1	SHISA9		MYL12B	CRYBB2			HN1L	LDHA		TMEM255B	ZNF564
LTBP1	SLC2A4RG		FZD1	TMEM132B			GAS6	OR7D4		NPTX1	OR10H1
MAML3	LIME1		CSNK1A1	PADI3			RAB40B	SLC5A1		CCND1	OR4N5
ZEB2	TSR3		LTBP1	MLN			FN3KRP	TAF1L		AP3D1	OR7G2
MYOM1	GNPTG		CHD7	MUC17			TMEM255B	SPG20		PCBP3	EMB
MXI1	CHST8		ZEB2	TMPRSS9			NPTX1	SMIM14		MCF2L	RFC5
NR2F1	CPAMD8		MYOM1	CCL16			RASA3	OR2L5		F7	TAF4B
CETN3	OR4N4		MAPRE2	MUC16			COL6A1	PSG11		GPR146	TGM6
UCHL1	DGKQ		NR2F1	SNAPC4			METRNL	C16orf97		ATP11A	CDRT15
TEAD1	SLC26A1		CETN3	CPXM2			MAFK	LPAR1		TMEM175	HAO2
RERE	IDUA		UCHL1	TPSD1			SLC38A10	CCL24		GAK	SPRR4
NRP2	FGFRL1		TEAD1	RNF151			LINGO3	AFG3L2		MAD1L1	FRG2C
C4orf36	BOK		RERE	C5orf60			DOT1L	TRIM61		HDAC11	ADH4
SHROOM3	METRN		NRP2	KLK6			MCF2L	OR7G1		ORAOV1	CYP2C18
DYRK2	WSCD1		C4orf36	RDH8			EPPK1	CST2		CLCN7	ZNF714
DAAM1	MIOX		AFF1	MLXIPL			GPR146	OR2L3		RAB11FIP3	ZNF91
FMNL2	AIPL1		SHROOM3	GAB4			ATP11A	SP110		MYT1	A2ML1
DCTN6	MRPS34		SOWAHB	JSRP1			TMEM175	TRIM60		C21orf2	CEACAM7
TRDMT1	NME3		DYRK2	NPAP1			GAK	OR10W1		NCOR2	MAPK10
HOXA2	EME2		DAAM1	GAL3ST2			MAD1L1	PSG1		RTEL1-TNFRSF6B	MYH8
C11orf58	SIN3B		FMNL2	TUBA3C			HDAC11	ZNF679		STMN3
PALM2	SCRT1		DCTN6	BPIFA2			ORAOV1	VSTM1		RTEL1
GTDC1	TMEM249		N4BP2L1	BPIFB6			CLCN7	TARM1		TSNARE1
HOXA1	SLC52A2		NCALD	ACER1			SORCS2	CCL16		PRR26
VIM	FBXL6		TRDMT1	RSPO4			RAB11FIP3	WIPI1		TPD52L2
ARID5B	SSTR5		HOXA2	ZBTB46			MYT1	NDE1		CELSR1
TRIM13	C1QTNF8		C11orf58	CST1			C21orf2	KIAA0430		COX19
DCLK2	KCNG2		PALM2	CASP14			NCOR2	PLGRKT		C9orf62
SAMD4A	SHISA6		GTDC1	CEACAM7			RTEL1-TNFRSF6B	RAB30		SOX8
THBS1	MPPED1		HOXA1	MYEOV			GMEB2	TMEM220		LMF1
SPATS2L	RGS12		SERP2	PSG9			STMN3	CCL3		NKAIN4
STXBP6	NWD1		VIM	TGM6			RTEL1	ISX		ARFGAP1
LBH	FTCD		ARID5B	MUC2			TSNARE1	HMGCS1		RGS19
TSC22D2	CACNA1B		TRIM13	MUC5B			PRR26	ZNF611		OPRL1
TLR3	TCL1A		DCLK2	MBD3L1			KCNQ2	CST5		BHLHE23
EPSTI1	CYTL1		SAMD4A	UBBP4			CELSR1	JAK2		HDAC4
REEP3	SLC25A1		XPNPEP1	AIFM3			COX19	PGRMC2		METRN
RAI14	TRPM1		THBS1	DPP7			C9orf62	RBAK-RBAKDN		NUBP2
MIOS	HSBP1L1		SPATS2L	PPP2R2C			SOX8	CPN1		MRPS34
TBL1XR1	CLDN5		STXBP6	KRT3			LMF1	TMEM132B		NME3
POC1B-GALNT4	LINC00955		FARP1	ZBTB32			NKAIN4	BFAR		PCMTD2
POC1B	NLRP1		LBH	AHRR			ARFGAP1	CYP2A13		SPON2
GALNT4	EPPK1		TSC22D2	PCBP3			RGS19	ANKRD30BL		DIP2C
STARD4	DLGAP2		TLR3	TMEM132D			OPRL1	CDH9		C19orf35
HOXB8	GPR26		EPSTI1	CST4			BHLHE23	OR51I2		DLK1
ETV6	PADI4		REEP3	SOHLH1			METRN	SIRPD		CYC1
QKI	CST2		GPR135	BPIFB1			MRPS34	SLC5A11		GPAA1
FYN	ABHD16B		RAI14	TEX29			NME3	ANTXRL		COL18A1
RASSF8	DUS1L		MIOS	SEMA4D			EME2	SLC7A13		GPR132
JMJD1C	CHID1		TBL1XR1	FAM209B			PCMTD2	C8orf44		ADRM1
PHACTR2	PUS1		POC1B-GALNT4	CIB3			ACSF3	MBD3L1		UBE2S
HIVEP2	IL17REL		POC1B	PPP1R27			SPON2	HSPB1		MAEA
UBE2N	ZNF280A		GALNT4	CARD14			DIP2C	RSL24D1		ACTG1
HIF1A	KCTD17		STARD4	IFNL3			UBE2I	CASP14		ZC3H18
IRF2BPL	BRF1		HOXB8	CCT8L2			CABLES2	C9orf85		PEX10
TPM1	SPON2		ETV6	OTOP1			MAPK8IP3	ABHD17B		NPBWR2
PTCD2	CORO2A		QKI	OAS1			CYC1	ADH1B		TEX19
MRPS27	ZNF750		FYN	LAT			GPAA1	IGFL3		SUMO3
CCDC82	GLB1L2		RASSF8	CYP4F22			EXOSC4	DEFB116		FSTL3
JRKL	SYCE3		JMJD1C	CST9L			COL18A1	KRTAP11-1		PQLC1
SERINC5	SLC6A18		PHACTR2	FADS6			ADRM1	TRUB1		ADARB1
PDCD4	TMEM175		HIVEP2	SERPINA12			MAEA	ZNF600		TMEM86B
NUAK1	GAK		UBE2N	PAEP			ACTG1	GADD45A		ZFPM1
CITED2	SLC9A3		MAP1LC3B2	ALOX15B			FSCN2	ZNF595		PALM
LRCH1	KIR2DL3		HIF1A	KRT34			ABCA2	PRELID2		PTBP1
ARHGAP5	NRBP2		TPM1	LCA10			TFDP1	HAVCR1		PLCH2
NCOA7	TMEM132E		PTCD2	MYADML2			BSG	SIRPB1		CDC16
FGFR1	C17orf102		MRPS27	NOS1			PEX10	KRTAP13-4		C1QTNF1
KLF7	CCDC154		CCDC82	PLA2G2C			SUMO3	ATP6V0D2		SNAPC4
HOXB5	OR10H5		JRKL	BOD1L2			FSTL3	PABPC1		PWP2
JAG1	CABLES2		SERINC5	GML			PQLC1	KLHL38		MTHFSD
ARMC2	MAN2B2		LIMCH1	ATP12A			ADARB1	HNRNPH3		POLRMT
RCBTB2	PRAME		PDCD4	SLC5A5			TMEM86B	PBLD		BRSK2
PAG1	LL22NC03-63E9.3		NUAK1	CYP2A13			ZFPM1	UBBP4		PDXK
MBNL2	EXOC3		CITED2	RASAL3			LSM14B	MC3R		GLOD4
DPH6	NOXA1		LRCH1	OR1M1			SLC39A3	ZNF823		MEIOB
PSD3	EXD3		ARHGAP5	KRT76			PALM	ENSA		RP1L1
MB21D2	LCNL1		NCOA7	PADI1			ZCCHC14	C8orf46		BRF1
ADAMTS5	TMEM204		HOXB5	C20orf78			PLCH2	TNFSF14		CDH23
EDN1	CBFA2T3		JAG1	KRTAP5-1			RTL1	VPREB1		PHRF1
MYSM1	C19orf35		ARMC2	APBA2			CDC16	CCR1		RASSF7
FGL1	MEIOB		USP25	CYP11B2			PWP2	KMT2E		NUDT1
PPID	HOMER2		HTRA4	GLP2R			UBE2G2	NFX1		RRP1
C2orf73	QSOX2		RCBTB2	CST7			DNLZ	AKTIP		SLC22A31
ERI1	IGLL5		PAG1	PAX2			ELFN1	WDR59		PHACTR3
TGFB2	CRYBB2		PLEKHA7	KRT73			MTHFSD	KRT16		LSM7
NUDT4	GPIHBP1		MBNL2	UGT1A3			AMH	ZNF622		TSR3
APP	LY6H		DPH6	HK3			POLRMT	TRIM54		GNPTG
DDHD2	TMEM132B		SMIM2	ACAN			BRSK2	ZNF736		TIMP2
LGR4	PADI3		PSD3	CECR1			GLOD4	PTER		MISP
MAP4K4	MLN		MB21D2	SNED1			SIK1	SOHLH2		TCF3
LDB2	MUC17		ADAMTS5	OR10H2			IL17REL	ACSM5		MICAL3
ARHGAP20	FGF19		EDN1	WBSCR28			BRF1	OR1M1		SLC45A4
YTHDC2	TMPRSS9		MYSM1	LY6K			CDH23	ZNF564		MUC5B
PDS5B	CCL16		PPID	MAS1			PHRF1	OR10H1		PSMA7
PPFIBP1	IL12RB1		C2orf73	OR6B2			RASSF7	ZNF808		SS18L1
BMPER	MAST3		ERI1	KRT82			RXRA	ZNF28		NRBP2
HOXB4	SNAI3		TGFB2	LAIR1			NUDT1	ASB18		QSOX2
GJA1	POLR2L		CCDC122	KRT6A			RRP1	DCUN1D1		R3HDM4
HECTD2	TSPAN4		LACC1	FCN1			IER5L	DDIT4L		KISS1R
MGST2	MUC16		APP	KRT1			PHACTR3	POC5		ARID3A
FGF1	SNAPC4		DDHD2	KRTAP10-5			LSM7	NHLRC1		TONSL
RPS27L	HS3ST6		CTDSPL	VPREB1			POLR2L	RNF144B		SOX7
COL5A2	RCE1		LGR4	TPM4			TSPAN4	OR13C2		TALDO1
FEM1B	TMEM121		MAP4K4	KLK13			TSR3	PPP1R3C		FAM53A
VLDLR	ZFP41		LDB2	OR2M4			GNPTG	OR51T1		AGPAT3
MCC	GUCY2D		TRIO	BTNL8			TIMP2	OR4N5		FZR1
ADD3	CPXM2		ARHGAP20	PSG5			MISP	OR7G2		DOHH
HAND2	JAKMIP1		YTHDC2	KLK9			TCF3	IGFL2		DNAL4
CDKN1B	ATP8B3		BHLHE41	POU5F1			SHISA7	TCEANC		SUN2
ZNF521	ANO1		PDS5B	SLC25A41			CHRNA4	GPR89A		MAN2B2
SH3PXD2A	TPSD1		PPFIBP1	TAF1L			MICAL3	EMB		PKMYT1
FNIP2	RNF151		BMPER	IGFN1			SLC45A4	KIR3DL2		NOXA1
KLLN	DNAJC5		GJA1	OR7C2			PSMA7	ZNF182		EXD3
PTEN	C5orf60		HECTD2	SPATC1			SS18L1	SPACA5		SAPCD2
KLF6	KLK6		MGST2	OR10H3			NRBP2	NPFFR2		MAN1B1
ZBTB10	NMRK2		FGF1	TBX1			QSOX2	PRSS54		BRD1
FXN	GMEB2		RPS27L	ZNF541			R3HDM4	CRNN		ZBED4
IGFBP5	RDH8		KLF3	MYO1F			KISS1R	VNN1		DNMT3L
PLCB1	COL5A3		COL5A2	CEACAM3			ARID3A	CCL19		SMAD7
CD36	MLXIPL		FEM1B	TM4SF19			TONSL	SLC22A10		WDR18
GNAI1	GPAA1		VLDLR	TCL1B			PREX1	DYX1C1		GRIN3B
LAMA4	TBL3		MCC	INSL3			SOX7	IST1		PCID2
MAP1B	LMF2		ADD3	CLEC4G			FAM53A	ZNF439		BAIAP2
GUCY1A3	GABRB3		HAND2	FAM166A			AGPAT3	CLEC17A		CAPN15
TNPO1	CEMP1		CUEDC1	C20orf197			FOXF1	SIGLEC9		ZNF555
SNX18	GAB4		CDKN1B	CABP5			DOHH	AGBL1		CELF5
IFIT5	DPH7		MATR3	NPBWR2			MAN2B2	IGFL1		FGF22
LIPA	JSRP1		ZNF521	SLC22A12			PKMYT1	HIST1H2BM		ZNF784
APBB2	NPAP1		SH3PXD2A	GPR179			UBAC1	IBTK		FBRSL1
C8orf86	GAL3ST2		IL12A	GGNBP1			NOXA1	TMEM65		PAQR4
ZMYND8	FBLN2		FNIP2	OR7A17			EXD3	HAUS6		TSPAN9
KRR1	FGF4		KLLN	KLK7			SAPCD2	BAMBI		HSF2BP
RNASEH2B	AGPAT3		PTEN	ZFP92			BRD1	EFCAB5		RRP1B
PTK2	NACC2		KLF6	ELFN1			ZBED4	SSH2		UBE2J2
RB1	AMH		ZBTB10	ITGAD			DNMT3L	STXBP4		SRRM2
MED13L	SLC6A3		FXN	FBXO39			SMAD7	COX11		ZBTB46
ZNF532	TERT		IGFBP5	CD209			WDR18	FAM214B		TRAPPC10
FOXN3	PGAM5		PLCB1	ANGPT4			GRIN3B	TGM6		C17orf107
SEMA3D	TUBA3C		CD36	KCNG4			PCID2	CTAGE1		CSNK1D
PRICKLE2	INTS1		GNAI1	SEC14L3			CUL4A	PPP4R2		NFIC
MND1	BPIFA2		LAMA4	KLHDC7B			BAIAP2	CNOT8		MORN1
ZNF24	FAM53A		MAP1B	OR10H1			CAPN15	TNC		RER1
AUTS2	BPIFB6		GUCY1A3	HLA-G			PMPCA	SHF		ADAMTS2
CAPZA2	ACER1		TNPO1	UNC13A			SDCCAG3	NBPF1		MRPS18A
PPIB	L3MBTL1		HOXB6	TRIML2			CELF5	UGT2B15		HBZ
CREM	B3GAT1		HOXB3	MRPL28			FGF22	DAGLB		HBM
CREBL2	MAP2K3		ITGA9	PSG1			ZNF784	CUTC		ZNF423
N6AMT1	PADI2		MOB3B	PRSS22			FBRSL1	ACAT1		HSPBP1
ACIN1	RSPO4		CCDC110	HBZ			DOC2B	ACSM1		BRSK1
C14orf119	ZBTB46		SNX18	HBM			KREMEN2	CDRT15		PPP6R1
FZD3	RGS19		IFIT5	TUBB3			PAQR4	OR7C2		ICOSLG
FBXO16	OPRL1		LIPA	PNPLA5			TSPAN9	MYBL1		STX16-NPEPL1
IRF2BP2	CYP4F12		APBB2	CRX			HSF2BP	CAP1		STX16
ARRDC3	LY6E		ADM	TPRX1			RRP1B	SPRR4		CCDC154
TSPAN13	UBAC1		AMPD3	ERN2			UBE2J2	NLRC4		C19orf25
MATN2	ATCAY		C8orf86	OR2T1			SRRM2	UGP2		ANKRD24
SH3PXD2B	PLEC		HOXA7	TDRD12			CBFA2T3	ACTG2		SIRT6
MTMR2	CST1		ZMYND8	DEFA5			JPH3	CXCR2		CREB3L3
RASL11B	METRNL		KRR1	MROH2A			TRAPPC10	FRG2C		PCNT
TMEM184C	CASP14		RNASEH2B	PLK5			OLFM1	DAPP1		C21orf58
APOBEC4	CEACAM7		TMPRSS7	ACTL9			CSNK1D	SVOPL		MPPED1
HOXB2	CEACAM5		PTK2	GTSF1L			NFIC	OC90		MED16
CBR4	MTA1		RB1	DNAH17			MORN1	CYP2C18		TMC6
SHOC2	MYEOV		HOXA13	GNG7			RER1	OR51Q1		TMEM8A
BBIP1	C9orf62		MED13L	BPIFB4			ADAMTS2	OR8B8		CMIP
SLC1A3	KIRREL2		ZNF532	GPR142			MRPS18A	OR8B4		CTBP1
PDZRN3	OR7C1		FOXN3	WDR88			HBM	BBS10		CAMSAP1
TIPARP	PSG9		PRICKLE2	PPP2R2D			ZNF423	OR1A2		SSNA1
JARID2	TGM6		HOXD9	LAT2			BRSK1	KRT39		ANAPC2
PCM1	BHLHE23		MND1	C20orf202			PPP6R1	ZNF708		RPS6KA4
CPOX	DLGAP4		HOXB7	TMEM215			STX16-NPEPL1	ZNF714		GINS2
RAP2A	DOK7		ZNF24	CGB7			STX16	ZNF85		LINGO1
MAML2	PAPD7		LYSMD4	CNFN			SDC3	ZNF91		SPR
SNAPC1	EPO		AUTS2	TSSK2			CCDC154	PSG6		ZNF581
RIN2	DNLZ		VEZF1	GPR132			AATK	SIGLEC12		ZNF580
COL1A2	ZDHHC12		CAPZA2	KRT78			C19orf25	NLRP2		COL5A1
HIBCH	SLC19A1		PPIB	GP6			SIRT6	CD160		CDKN1C
SMIM20	MUC2		CREM	RETN			PCNT	BNIP2		LSG1
BAMBI	RAC2		CREBL2	SPTBN2			C21orf58	ANO4		ARFGEF2
HIST2H2AB	OLFM1		ZNF217	PROZ			PXMP2	DIABLO		SEPT9
HIST2H2AC	MUC5B		ACIN1	LTA			POLE	PPP1R17		CDT1
HIST2H2BE	RHPN2		C14orf119	TNF			BAK1	FAH		UVSSA
BOLA1	BLACE		FZD3	SCGB1D2			SEZ6	C9orf152		BRD9
ZBTB20	HMX3		FBXO16	SLC13A5			MPPED1	CYB5B		TRIP13
WNK1	MMP17		IRF2BP2	LGALS16			MED16	CA6		AGPAT2
AFAP1	JAKMIP3		ARRDC3	PSG4			TMC8	C15orf53		VPS53
KCNRG	MBD3L1		TSPAN13	CSTL1			TMEM8A	CEACAM7		FAM57A
SLX4IP	UBBP4		MATN2	C14orf177			CMIP	STAG1		SYT8
MKKS	PDCD1		SH3PXD2B	CCL25			CTBP1	MAPK10		TNNI2
PARVA	AIFM3		MTMR2	SEMA6B			CAMSAP1	TENM3		TBL3
GRHL2	DPP7		RASL11B	PLA2G2F			RPS6KA4	ELL2		SLC35B2
COL4A1	SEPT3		TMEM184C	SAA2			GINS2	PNRC1		IRF7
COL4A2	CPT1B		TMEM252	LILRA1			HSBP1L1	C8orf44-SGK3		PSAPL1
TMEM65	NDUFB10		APOBEC4	KRTAP10-9			LINGO1	VCPIP1		NDOR1
GTF3C3	CCNDBP1		PLXNC1	KRTAP10-10			NKX6-2	SLC11A2		TMEM203
DIRC1	PPP2R2C		HOXB2	KRT77			FAM53B	NFKBIA		TPRN
SKP2	KRT3		CBR4	OBP2A			ZNF581	TTBK2		SIGIRR
LMBRD2	ZBTB32		SHOC2	CLEC17A			ZNF580	CYP2A7		ISOC2
TBC1D9	NAA10		BBIP1	PLIN4			C10orf105	NBN		OXLD1
C9orf72	RENBP		ZIC1	CYP2F1			VPS28	DECR1		CCDC137
PTPRG	ARHGAP4		SLC1A3	SIGLEC8			CDKN1C			NPLOC4
FAM227B	AHRR		PDZRN3	DOC2A			COX4I1			PDE6G
DTWD1	PCBP3		TIPARP	LST1			EMC8			TLE2
LNX1	ANO7		JARID2	NCR3			ARFGEF2			MFNG
PAIP2	TMEM132D		PCM1	SIRPD			SEPT9			CSTB
TRIB2	CST4		CPOX	IFNL1			EEF1A2			HPCAL1
RPS13	SOHLH1		RAP2A	KRT2			CDT1			CEMP1
MN1	KCNT1		MAML2	OR2AT4			BRD9			MOV10L1
NFIB	ABCD1		SNAPC1	TGM7			TRIP13			SCRT1
EPS8	BCAP31		RIN2	CDRT15L2			AGPAT2			SLC52A2
STRAP	BPIFB1		COL1A2	RIMBP2			FAM57A			DGAT1
FZD8	PARVB		INPP1	CLIP4			TNNI2			FBXL6
PRKCE	UNKL		HIBCH	KRT71			TBL3			EMX1
KLHL38	GPS1		CD200R1	APOBEC3H			SLC35B2			SBK3
ANGPTL2	RFNG		SEL1L3	KRT84			PSAPL1			SBK2
APH1B	ZBTB49		SMIM20	CD70			NDOR1			EEF2
CDK5RAP3	LYAR		BAMBI	HCAR3			TMEM203			PPP2R2C
CLVS1	PSMA7		HOXB9	SLC13A2			TPRN			PGAM5
HSPA14	SS18L1		HIST2H2AB	BPIFA1			PKP3			RNF151
CDNF	PSAPL1		HIST2H2AC	SIGLEC12			SIGIRR			ATP8B3
SLC16A12	KLC3		HIST2H2BE	GJB5			NXN			RAPGEF1
SLC38A1	TEX29		BOLA1	KRT6C			OXLD1			ZNF787
MLLT3	FCN2		ZBTB20	BPIFA3			CCDC137			DIP2A
SMARCA2	BTNL9		WNK1	OR1N1			NPLOC4			ZNF77
TBC1D23	HSF1		AFAP1	C3orf22			PDE6G			GLYCTK
BCL2	P2RX2		SLX4IP	OR1G1			TLE2			TMEM190
PCYOX1L	PARVG		MKKS	DPRX			MFNG			IL11
PDLIM5	COMMD5		EML6	IFNL2			CSTB			SLC6A3
MEIS2	CALY		PLAGL1	ITGAE			HPCAL1			GPC1
SFR1	PRAP1		PARVA	SPINT3			MOV10L1			NACC2
NEDD4L	FUOM		GRHL2	CD19			SCRT1			INPP5E
RELL1	NPS		CLUL1	OR1I1			TMEM249			CALY
GLCCI1	IL17C		COL4A1	VSTM1			SLC52A2			PRAP1
NFIA	SLC17A9		COL4A2	TARM1			DGAT1			C16orf95
CENPF	SEMA4D		TMEM65	KRT74			FBXL6			TFF1
CCDC150	CEP72		LHX9	ZNF536			EMX1			ADCK5
ARHGAP42	CDH15		GTF3C3	KRTAP10-1			SBK3			FOXL1
S1PR1	FAM209B		SKP2	PSG6			EEF2			TOLLIP
LMO4	CIB3		LMBRD2	ASGR2			PPP2R2C			CACNA1H
SMAD6	AMDHD2		TBC1D9	NAALADL1			PRRX2			SHANK3
GRIA2	ATP6V0C		ARNTL2	OR10W1			OAZ1			ZSCAN10
ERMN	CERCAM		C9orf72	CST11			PGAM5			ZNF205
METTL14	LSP1		PTPRG	RASGRP4			ATP8B3			GNG7
PPP4R1	PPP1R27		TRAK1	RYR1			CDH22			TPRG1L
PDLIM3	GCGR		FAM227B	PHACTR3			RAPGEF1			PXDN
GSTO2	CARD14		DTWD1	GSC2			GGT6			DIO3
ATP5G2	IFNL3		LNX1	LAIR2			DIP2A			DBH
ETS1	FUT7		PAIP2	CA5A			ITPK1			ELANE
GAP43	ABCA2		RREB1	HCAR2			PWWP2B			C19orf24
SESN3	GRIK4		TRIB2	PRR25			HMCN2			COX6B2
UBE2E2	ENGASE		RPS13	TMPRSS6			IL11			A4GALT
ADAMTS9	ARFGAP1		EPS8	CYP2A6			SLC6A3			SLC25A42
PLCXD2	ANKRD24		STRAP	ST18			SLC12A5			SMG5
MNAT1	SIRT6		FZD8	ARRDC5			TRMT2A			ARRB1
PPP1R3C	CREB3L3		PRKCE	KCNA7			CASZ1			ABCG1
ASAP1	DOCK3		KLHL38	SLC1A6			GPC1			RNF213
PHLDA1	CCT8L2		ANGPTL2	CCDC105			NACC2			HHIPL1
ITGB6	OTOP1		APH1B	NLRP9			INPP5E			ZGPAT
TNIK	ATP1B2		CDK5RAP3	GP9			CALY			ARFRP1
CSGALNACT1	KRT5		CLVS1	FCER2			FUOM			C2CD2
PRICKLE1	LRPAP1		HSPA14	KRTAP5-6			PRDM16			ELFN2
ZBTB2	HDAC11		CDNF	CYP2A7			ADCK5			SCRIB
TET2	MYH11		PHLDB2	TMEM184A			FOXL1			UNKL
DOCK4	RNF213		SLC16A12	SPN			TOLLIP			C16orf90
ZNF277	LAT		ATG16L2	APOF			INF2			NDUFA8
MTSS1	CYP4F22		SLC38A1	OR7D4			CACNA1H			MORN5
ZDHHC21	CST9L		PLEKHA2	SHANK2			MMP25			GOLGA3
HMBOX1	FADS6		MLLT3	KRT20			COL20A1			TMEM238
INTS9	EP400NL		EML4	NPC1L1			AIRE			RPL28
MTCH1	SERPINA12		RTN4	PCP2			PFKL			COL23A1
XRCC4	GPR35		TBC1D23	TP53TG5			ZNF556			CNPY1
TMEM167A	PAEP		ZNRF3	TCP10L2			CHD5			INPP5A
FBXL7	RAB11FIP3		BCL2	SLC22A6			BIRC5			SF1
ZNF703	EPS8L2		PCYOX1L	TCP10L			SHANK3			TUBGCP3
CRIM1	TEX19		PRKCA	LY6G5B			RASGRP2			WDR4
ARHGAP26	ALOX15B		PDLIM5	OR2G2			ZSCAN10			SLC6A7
CAV1	NAT16		MEIS2	TEX37			ZNF205			NRXN2
WDR7	GAS6		AK4	XCR1			GNG7			TMEM204
GAS1	CYFIP1		SFR1	ZG16B			TPRG1L			ZNF516
NFE2L1	KRT34		NEDD4L	KRTAP3-3			DIO3			NPTXR
KANK1	NUDT14		RELL1	PSG11			COX6B2			CHSY1
IRX5	SERPIND1		GLCCI1	SIGLEC9			A4GALT			HAPLN4
CPEB2	LCA10		NFIA	KRTAP10-3			ARRB1			COTL1
TFEC	TPO		CENPF	KRT10			NLGN2			KCNH4
LRIG3	PRSS33		CCDC150	OR6F1			ABCG1			DNAJB8
LSG1	TMEM8A		ARHGAP42	ZNF716			RNF213			HBQ1
SEPT11	TXNRD2		S1PR1	NLRP13			LFNG			APOBEC3B
ATP1B1	COMT		LMO4	KRTAP4-11			FGFR1			ABCA7
STARD13	ZXDC		NOTCH2NL	CD6			HHIPL1			SPATA33
LIMS1	NOTUM		GRIA2	CYP4F2			ZGPAT			CHMP1A
C12orf60	MYADML2		ERMN	PI3			ARFRP1			HOXB8
WBP11	CDT1		METTL14	FSD1			C2CD2			BRAT1
LRRTM2	GNAZ		PPP4R1	IL2RB			ELFN2			ZNF75A
ACVR1	SIRT7		SAMD12	LPO			SCRIB			TIGD7
TNC	WFDC1		PDLIM3	SIRPB1			UNKL			TSPAN3
APCDD1	CHP2		GSTO2	PNMA5			GOLGA3			KRTAP5-5
SF3B4	NOS1		ATP5G2	LRFN1			TMEM238			MOB2
AKAP12	IRX1		ETS1	CCR6			COL23A1			GATA5
HOXA4	MTRNR2L1		GAP43	UGT1A5			CNPY1			PDE9A
FCHSD2	AXIN1		TSPAN9	UGT1A6			TUBGCP3			EVL
OXCT1	ASPHD1		UBE2E2	ITGAM			SLC6A7			KLHDC4
MBLAC2	EN2		ADAMTS9	KRT33A			MAFA			GEMIN4
BOC	CST9		PLCXD2	TACR2			NRXN2			MAP1LC3B
ADAMTS6	ZGPAT		MNAT1	TGM5			NPTXR			DNAAF3
ARHGAP18	ARFRP1		TMEM30B	SIGLEC14			CHSY1			SOX1
PDE3A	BHLHA15		NR4A2	TPTE2			KCNH4			MECR
HNRNPA1	B3GNT3		PPP1R3C				NKD2			DGKQ
CBX5	PLA2G2C		ASAP1				HBQ1			IDUA
COMMD2	PTPRN2		PHLDA1				APOBEC3B			FGFRL1
WDR31	BOD1L2		FRMD4B				SPATA33			MRGPRE
DUSP16	GML		ITGB6				CHMP1A			SLC6A12
LIPJ	TBC1D13		TNIK				HOXB8			SDR39U1
TSHZ2	AJAP1		CSGALNACT1				WFIKKN1			FBXO31
BICC1	ADCK5		PRICKLE1				ZNF75A			CRAT
SIL1	ATP12A		ZBTB2				TIGD7			ATAD3B
PFDN4	SAPCD1		DOCK4				FAM19A5			CACNA2D2
IGFBP2	SLC5A5		ZNF277				MOB2			HOXA1
COL3A1	CYP2A13		MTSS1				GATA5			RPS3
SLC9C1	KCNN1		ZDHHC21				PDE9A			TIAF1
FAM184A	RASAL3		KL				TRMU			GIPC3
COMMD3-BMI1	MRPL20		HMBOX1				EVL			CCDC94
ZNF622	OR1M1		INTS9				GEMIN4			CAPN11
CDC42EP3	BIRC7		MTCH1				SOX1			ZNF174
MAP4K3	KRT76		XRCC4				MECR			ZSCAN32
RAPGEF2	PADI1		TMEM167A				DENND3			ZNF707
AIG1	C20orf78		FBXL7				GAA			STK24
SREK1	EHMT1		ZNF703				DGKQ			SYT5
COLGALT2	ARRDC1		CRIM1				IDUA			HSF1
LDLRAD3	MYL10		ARHGAP26				FGFRL1			APBA3
FZD4	PEPD		CAV1				ERICH1			RNF166
ERLIN2	NDOR1		WDR7				MRGPRE			CTU2
TOM1L2	TMEM203		GAS1				ADAP1			CARD14
TBC1D19	TPRN		NFE2L1				ATAD3B			TCF15
MNS1	KRT79		DENND3				GPR35			RUFY1
ZNF697	POFUT2		KANK1				CACNA2D2			RAB20
AP3B1	KRTAP5-1		FAM134B				TIAF1			KRT78
UTS2B	CYP4F3		CPEB2				TNRC6C			ZNF213
CCDC50	ZFYVE28		TFEC				APC2			HAMP
ARHGAP10	APBA2		LRIG3				GIPC3			HOXB7
GPR19	COL9A3		LSG1				ZNF707			GPX4
SMCO3	CYP11B2		SEPT11				STK24			DECR2
MRPS35	GLP2R		ATP1B1				SYT5			SAMD10
ZNF397	CST7		STARD13				HSF1			PTPRN2
SPRYD7	PIEZO1		LIMS1				APBA3			DLX4
ZSCAN30	PAX2		C12orf60				RNF166			DDX39A
PLXNA2	DEFA4		WBP11				CTU2			ADORA2A
C9orf3	CLDN15		ARHGEF3				TCF15
GAB1	RELB		LRRTM2				RUFY1
VCAN	EFCC1		ACVR1				ABCA3
SRP19	KIAA1257		TNC				TFEB
APC	CAMKK1		APCDD1				HCN2
CUL2	KRT73		FBXL18				ATP2A3
HMGA2	RAB11FIP4		SF3B4				PRPF6
DNAJC6	ATP10A		AKAP12				SAMD10
KIAA0922	ADAMTS16		HOXA4				PTPRN2
CTSO	IL4R		FCHSD2				DLX4
ATP2B1	UGT1A3		OXCT1				ADORA2A
KPNB1	HK3		MBLAC2
APOLD1	PTGES		BOC
SLC40A1	FAM193A		ADAMTS6
NID2	ACAN		ARHGAP18
ZFYVE26	CECR1		PDE3A
RAD51B	LPCAT1		HNRNPA1
GARNL3	ZMYND19		CBX5
SLC35A5	JPH3		PRRX1
ATG3	TONSL		COMMD2
TACC1	TAS1R3		WDR31
HERPUD2	SNED1		DUSP16
IGFBP3	UMODL1		TSHZ2
C8orf48	MUC3A		BICC1
C10orf107	CDH1		SIL1
KIF26B	OR10H2		PFDN4
TBC1D4	DECR2		IGFBP2
SRP9	WBSCR28		COL3A1
LCLAT1	LY6K		SLC9C1
PDGFRA	EVC2		FAM184A
GTF2E2	MAS1		HOXD12
BDH2	CCDC57		MFHAS1
CCDC80	OR6B2		COMMD3-BMI1
GAPT	ZNF556		ZNF622
CEP41	KRT82		SMAD3
MRPS28	LAIR1		CDC42EP3
MED30	SLC38A8		MAP4K3
FAM149A	KRT6A		AIG1
COPZ1	FCN1		SREK1
ANTXR1	KRT1		COLGALT2
BRCA2	GABRG3		TJP2
TMEM44	KRTAP10-5		LDLRAD3
BMI1	VPREB1		FZD4
LLPH	IGFALS		ERLIN2
POLR2M	FA2H		TOM1L2
MTHFD1L	TPM4		TBC1D19
FRY	KLK13		FSCN1
WDR78	TRAF3		MNS1
MIER1	OR2M4		ZNF697
TRIM2	BTNL8		AP3B1
FAM122A	PSG5		UTS2B
SMUG1	KLK9		CCDC50
USP38	KLK8		ARHGAP10
TMEM144	PAX7		GPR19
SMIM13	VENTX		MRPS35
SDC2	MAFK		ZNF397
DNAJC21	KCNQ2		SPRYD7
ASB4	POU5F1		MBOAT4
PGM2	SYT12		ZSCAN30
TOMM7	HTR3D		PLXNA2
RYBP	SLC25A41		GAB1
NREP	AMN		VCAN
BET1	TAF1L		SRP19
RNF219	FAM83F		APC
AHR	SLC22A11		CUL2
AKAP2	STX1A		HMGA2
PALM2-AKAP2	ITGAX		DNAJC6
RFESD	C14orf132		KIAA0922
SYPL1	OSBPL2		CTSO
IDO1	EEF1A2		KPNB1
ZHX1	IGFN1		APOLD1
ERCC8	OR7C2		SLC40A1
NDUFAF2	SP110		NID2
WASF2	PARP10		ZFYVE26
HINT3	SPATC1		RAD51B
HAS2	TALDO1		GARNL3
FAM189A2	MYO5B		SLC35A5
EFCAB11	OR10H3		ATG3
TDP1	ACHE		TACC1
PRPF40A	TBX1		DNM3
ARL6IP6	UNCX		SLC25A26
ENAH	ZNF541		HERPUD2
MYO1B	MYO1F		IGFBP3
TTC23L	CEACAM3		C8orf48
C1orf105	TM4SF19		C10orf107
PRDM6	FGF3		KIF26B
ZNF143	ULK1		TBC1D4
LPAR1	TCL1B		NCOR2
FLRT3	CPEB1		SRP9
TMEM212	INSL3		LCLAT1
TANC1	SERPINA9		PDGFRA
MACC1	VWA5B2		GTF2E2
ABCA10	CLEC4G		ELL2
GPR89B	SNX8		BDH2
TLR10	L1CAM		CCDC80
OVCA2	FAM166A		CEP41
CDH11	NELFB		MRPS28
GLRB	C20orf197		MED30
TGFB3	CABP5		FAM149A
SOX4	WDR45		MICAL2
BACH2	GDF1		NFE2
MKL1	CERS1		COPZ1
FGF18	RASAL1		FAM174B
SPAG1	MAP1S		ANTXR1
FRZB	SCNN1B		BRCA2
ISPD	GAL3ST1		TMEM44
POLE3	NPBWR2		BMI1
C9orf43	SLC22A12		MAPK8IP1
SIK2	CTTN		LLPH
CERS6	GPR179		POLR2M
HIST1H3G	MATK		GCOM1
HIST1H2BI	RAC3		MYZAP
ZNF572	SLC12A5		MTHFD1L
C12orf65	XAF1		FRY
PIK3R1	CACNA1A		WDR78
STIM2	KIFC2		MIER1
SLK	CYHR1		TRIM2
CAMK4	FOXH1		FAM122A
SPRED1	PPP1R16A		SMUG1
ISCU	PRR5		SGIP1
AMOTL2	TOLLIP		USP38
EDNRA	SERPINA3		TMEM144
AKAP6	PGPEP1		SMIM13
DNAJC1	GDF15		SDC2
TYMS	AP1B1		DNAJC21
CTGF	GGNBP1		ASB4
PDGFRL	SDHAF1		PGM2
STC1	TMPRSS2		TOMM7
HRASLS	NARFL		MEF2A
EBF2	MSLN		RYBP
USPL1	OR7A17		FZD5
HMGB1	KLK7		BET1
ADAMTS15	SPPL2C		RNF219
ATP5J	ZFP92		AHR
GABPA	CNTN2		AKAP2
CCDC141	ASIP		PALM2-AKAP2
RNLS	TRIM56		RFESD
E2F7	ELFN1		SYPL1
KCNJ2	ITGAD		IDO1
PGM1	KANK2		ERCC8
ITGB3BP	FBXO39		NDUFAF2
ANKRD1	CD209		WASF2
ITPR1	ANGPT4		HINT3
WDYHV1	SCRIB		HAS2
ATAD2	ENO2		FAM189A2
PGRMC2	KCNG4		EFCAB11
MED4	SAPCD2		TDP1
NOD1	UAP1L1		PRPF40A
SOCS2	CSNK2A2		ARL6IP6
PTX3	CHD5		ENAH
GGCT	SEC14L3		MYO1B
RAB31	CDH23		P2RY6
HIST1H1E	CSNK1D		PRDM6
HIST1H2BD	KLHDC7B		ZNF143
RBM20	CPLX1		ETS2
SGMS1	OR10H1		LPAR1
FGL2	GPR78		FLRT3
FAM133B	AP3B2		KREMEN1
CNOT2	HLA-G		BTG2
LHFP	UNC13A		TANC1
FAT4	PCMTD2		HOXD10
FILIP1	ZCCHC14		MACC1
HDAC9	BCL6B		GPR89B
MEIS1	GPT		HECA
STK39	PRND		TLR10
ZNF189	SNCB		CDH24
MRPL50	MUC12		OVCA2
ACP6	MKNK2		CDH11
TRMT11	TRIML2		YPEL2
FAM13C	MRPL28		TAPT1
SMG7	PSG1		NQO2
TNRC18	PRSS22		ZIC4
VPS45	TNIP2		GLRB
METAP1	TBC1D24		RNF19A
NR3C2	HSD3B7		BACH2
PIP5K1B	JAG2		MKL1
MYL12A	MFNG		FGF18
ST5	NRROS		SPOCK2
AKIP1	HBZ		NOX5
WSB1	HBM		SPAG1
CD47	TUBB3		FAM49B
EPHB3	LRRC14B		TBX2
ABCC9	PNPLA5		FRZB
EPYC	CDHR2		ISPD
CELF2	GHRL		POLE3
DSE	WFIKKN1		C9orf43
TSPYL4	PRIMA1		SIK2
IFIT2	ACSF3		CERS6
NRIP1	CRX		HIST1H3G
FRMD4A	TPRX1		HIST1H2BI
ARGLU1	CLIC3		ZNF572
CD164	C9orf142		C12orf65
ITM2B	ERN2		PIK3R1
EEA1	CLIP2		STIM2
DPYSL3	SLC25A10		SLK
DNAJB12	MRPL12		CAMK4
DIP2B	OR2T1		SV2A
TMTC2	LDOC1L		SPRED1
SPRY1	C1QB		ISCU
RGMB	IL21R		EDNRA
PLEKHM3	DRD4		AKAP6
LAPTM4B	KIAA1024		DNAJC1
ALPK2	TDRD12		TYMS
CACHD1	DEFA5		FAM129A
C8orf4	CDA		CTGF
SLC2A8	ASB18		MAP3K1
IGSF3	THBD		PDGFRL
C1orf220	SPO11		STC1
BEND3	PANX2		ADORA2A
RDH10	MROH2A		HRASLS
RPL7	GRM4		EBF2
PRKG1	ZNF707		USPL1
PEAK1	PLK5		HMGB1
HMG20A	ACTL9		ATP5J
SP3	C11orf86		GABPA
SLC14A2	NUDT16L1		CCDC141
COG6	ANKRD9		RNLS
PIGC	IFFO2		E2F7
NEUROG2	GTSF1L		KCNJ2
ARSB	WBP2NL		PGM1
CTBS	DNAH17		ITGB3BP
SMIM19	GNG7		ANKRD1
SLC20A2	BPIFB4		PRKCH
TMTC3	GPR139		MLPH
CEP290	GPR142		ITPR1
TBX3	WDR88		RIPK1
HIST1H4E	PPP2R2D		WDYHV1
FN1	LAT2		ATAD2
EBF1	KLHDC7A		MYO10
TAB2	PDXK		PGRMC2
TRIP4	HTR3E		MED4
CISD2	C20orf202		NOD1
UBE2D3	TMEM215		DENND1A
BOD1L1	DLX4		LAYN
ACTB	CGB7		SUMF1
FAM26E	RTN4R		PTX3
ING3	PCK1		GGCT
RBM12B	ZNF469		RAB31
RBM12B-AS1	CNFN		HIST1H1E
DUSP6	FBXW12		HIST1H2BD
TMSB4X	TSSK2		RBM20
HECW2	SLC39A4		FAR2
NAP1L1	ARHGAP23		SGMS1
METAP2	DPYSL4		FGL2
KIAA0754	GPR132		FAM133B
ISOC1	S100B		CNOT2
EPB41L2	CFB		LHFP
CRADD	KRT78		CD58
INTS6	MVP		FAT4
ABCA9	GP6		FILIP1
SLC4A4	ARMC5		HDAC9
KDSR	TRAPPC5		STK39
MRPS31	RETN		REEP1
NEURL1B	FOXL1		ZNF189
CASC10	SLCO4A1		MRPL50
BCL2L2-PABPN1	SEC14L5		ZNF365
BMPR1B	PPL		ACP6
ANKMY2	S100P		TRMT11
BZW2	C11orf80		FAM13C
OTUD6B	SPTBN2		SMG7
PANK1	PROZ		TNRC18
SCAF11	LTA		VPS45
CHD2	TNF		METAP1
ZHX2	SCGB1D2		NR3C2
FOSL2	SLC13A5		PIP5K1B
AMZ2	EIF3G		NTN4
TIGD4	P2RY11		MYL12A
ARFIP1	LGALS16		ST5
GIN1	CSTL1		AKIP1
PPIP5K2	C14orf177		WSB1
DFNB59	ZNF792		FLNB
PRKRA	LRRN2		CD47
TGFBR2	SLC44A4		ABCC9
NAMPT	CCL25		RNF144A
PTDSS1	SEPT1		CELF2
SLC38A2	HGFAC		DSE
CXADR	POLD4		TSPYL4
CREB3L2	DPEP3		IFIT2
OSR1	SEMA6B		NRIP1
TATDN1	PLIN5		FRMD4A
NDUFB9	LRG1		C7orf49
F3	IL22RA1		SLCO3A1
POLR3GL	PLA2G2F		ARGLU1
ANKRD34A	LCN6		CD164
SSR3	LCN10		ITM2B
ENPEP	SAA2		SLC28A1
SLC12A2	ELAVL3		EEA1
NIN	LILRA1		DPYSL3
ATP2B4	KRTAP10-9		HOXD1
TOX	KRTAP10-10		DNAJB12
HIST1H4H	MIB2		DIP2B
RHOU	KRT77		TMTC2
GJA5	HAGH		RGMB
TMEM217	PRRX2		PLEKHM3
TBC1D22B	ZNF467		SLC44A3
N4BP2L2	TTYH1		LAPTM4B
ANXA2	OBP2A		ALPK2
ARPC5	ORAI2		ZMIZ1
RGL1	WIZ		CACHD1
INPP4B	CLEC17A		C8orf4
POP1	PHLDB3		SLC2A8
CCDC6	PLIN4		IGSF3
TRAPPC3L	CYP2F1		C1orf220
TAX1BP1	SIGLEC8		MFSD6
DLEU1	C16orf92		BEND3
ANP32A	DOC2A		RDH10
NFKBIZ	ADAMTS2		RPL7
RNF13	YJEFN3		PRKG1
C14orf93	PPP1R26		PEAK1
KCNJ16	RNF212		HMG20A
LEPR	MUC5AC		SP3
LEPROT	TNNT1		SLC14A2
NUDT6	MX2		COG6
SPATA5	PMPCA		ATP1A1
NCOA3	SDCCAG3		PIGC
TNFAIP8	UBE2G2		USP46
SCHIP1	SFRP5		NEUROG2
VPS37A	TPPP		CTBS
CNOT7	SLC52A1		SMIM19
TMEM64	TMEM221		SLC20A2
SACM1L	LST1		TMTC3
TAGLN3	NCR3		CEP290
MAN2A1	KCNC4		TBX3
MTDH	LDHC		HIST1H4E
NARS	ARHGDIA		FN1
C11orf44	TRIML1		EBF1
SCRG1	HEMGN		TRIP4
FOXG1	CRTAC1		CISD2
ZFAND3	SIRPD		UBE2D3
SH3D19	PLD4		BOD1L1
SOX2	IFNL1		ACTB
CLDN1	IQCF6		FAM26E
ARHGEF38	LTB		ING3
PDSS2	KRT2		RBM12B
PKP4	PPIL2		RBM12B-AS1
CCDC148	OR2AT4		ZDHHC13
ANAPC16	DTX1		DUSP6
ASCC1	HOMER3		TMSB4X
DUSP1	ZC3H12A		HECW2
RAD52	SLC6A11		NAP1L1
ERC1	TGM7		METAP2
DUSP4	SLC7A10		KIAA0754
TMEM192	CDRT15L2		ISOC1
KLHL2	RIMBP2		EPB41L2
NCOA2	PLA2G2E		HOXA11
SUV39H2	CLIP4		CRADD
FAM198B	NGEF		INTS6
CAND1	TMEM95		ABCA9
TXNL1	KCTD11		SLC4A4
TMEM161B	SLC32A1		KDSR
KCNMB4	GADD45B		MRPS31
AP2S1	LRFN4		NEURL1B
KLHL5	KRT71		CASC10
TMEM261	MAP3K10		BCL2L2-PABPN1
GNA12	PIM3		SREBF1
TRMT12	APOBEC3H		TNS3
PHTF2	KRT84		FAM20A
TMEM60	SH2B2		BMPR1B
FOXP2	CRNN		ANKMY2
CAV2	CD70		BZW2
DDIT4	HCAR3		OTUD6B
DTWD2	SP140L		PANK1
CD109	SLC13A2		CD44
SLC2A1	MLKL		SCAF11
PITPNC1	NAGPA		CHD2
TPD52	BPIFA1		ZHX2
GSTCD	NUDT1		FOSL2
PLK2	NKX2-2		AMZ2
POU3F2	SLC22A10		TIGD4
LRRC17	SIGLEC12		ARFIP1
RHOBTB1	C19orf18		GIN1
ARHGDIB	GJB5		PPIP5K2
ZCRB1	AGXT		DFNB59
COX7A2	WDR45B		PRKRA
TUBE1	CCL3		TGFBR2
FAM229B	SLC9A3R1		NAMPT
EPGN	KRT6C		PRSS48
ITGA1	PEX10		PTDSS1
PELO	FCHO1		SLC38A2
HEATR5A	MICALL1		CXADR
TANK	BPIFA3		CSRP1
MDFIC	OR1N1		SIPA1L1
SCFD2	ZFP42		TLN2
OXR1	EPB41L1		GPRC5A
LRIG1	CES1		CREB3L2
AKTIP	C3orf22		OSR1
CLTC	OR1G1		TATDN1
GARS	DPRX		NDUFB9
PDP1	RAB3B		F3
ATP5S	WNT7A		POLR3GL
L2HGDH	BTNL3		ANKRD34A
TSN	PITPNM3		SSR3
MANSC1	C19orf45		ENPEP
VCAM1	IFNL2		SLC12A2
PAIP1	ZFP36		NIN
CPA5	PPP1R16B		ATP2B4
TMED10	CARD10		TOX
FOXO3	ATP2B2		HIST1H4H
BTAF1	OTOG		NHLRC1
PTPN13	ITGAE		GJA5
MAGI2	PLVAP		TMEM217
TNFRSF11B	SPINT3		N4BP2L2
ATL1	DRD1		ANXA2
MANBA	INF2		ARPC5
UFSP2	TRIM14		RGL1
SNX2	CD19		INPP4B
MIB1	NLRP8		MRPS18A
WLS	SUMO3		POP1
VEPH1	BTBD6		CCDC6
HIST1H1D	RHOD		TAX1BP1
GDPD1	OR1I1		DLEU1
HMGCR	MMD2		SPESP1
MEOX2	LRP3		EZR
MGP	VSTM1		NFKBIZ
PFKM	TARM1		RNF13
SENP1	CD81		CXCL3
CDK14	CNIH2		PPIC
FAM114A1	KRT74		FNDC9
IFT81	ZFR2		C14orf93
SLC1A4	ZNF536		KCNJ16
PIGF	KRTAP10-2		LEPR
CRIPT	KRTAP10-1		LEPROT
SCAF8	COL6A2		NUDT6
TCF7L2	ASS1		SPATA5
MSMO1	SLC37A1		NCOA3
IL6ST	WNT3A		TNFAIP8
USP16	PSG6		SCHIP1
SRSF1	PHLDA2		SH3RF1
DIRAS3	ASGR2		WWC2
DDAH1	NAALADL1		KLKB1
CYR61	OR10W1		VPS37A
RASGRP3	OR11H6		CNOT7
PLD1	CST11		TMEM64
BNIP1	TAF4		NECAB1
E2F3	PLXNB3		SACM1L
DTD2	GRIK5		TAGLN3
RIPK2	ZNF574		MAN2A1
NAV3	LCAT		MTDH
NFKB1	OR2M3		SVIL
TMEM41B	TMEM255B		NARS
PTPN1	RASGRP4		C11orf44
TYW5	RYR1		SCRG1
RFC3	PHACTR3		FOXG1
EFCAB13	DPP3		ZFAND3
TLE1	ENO3		PLEKHO2
CBX1	ETV2		SH3D19
CASC4	EBI3		SOX2
RBM26	MEF2B		KIF13B
PSMB5	GSC2		CLDN1
DDX20	ATOH8		ARHGEF38
FAM212B	TMEM147		PDSS2
CCNL1	LAIR2		PDK4
ANTXR2	NCAN		PKP4
CLGN	NR2C2AP		CCDC148
LRP6	CA5A		ANAPC16
MSRB3	CACNA1E		ASCC1
DNAJC15	HCAR2		DUSP1
CLEC16A	CNPY1		RAD52
IRF6	PRR25		ERC1
DTNA	TMPRSS6		DUSP4
DPT	NFIC		TMEM192
TMEM246	CYP2A6		KLHL2
TPT1	RABL6		NCOA2
DNM1L	ASPG		SUV39H2
ZBED6	DEF8		IFIH1
ZC3H11A	PDE4A		GCA
RAB1A	C19orf38		FAM198B
ANXA13	UCKL1		CAND1
TOB1	VWA7		TXNL1
HIST1H3E	ST18		TMEM161B
CPED1	ARRDC5		KCNMB4
MYCBP2	IP6K3		AP2S1
SLC5A3	KCNA7		KLHL5
MRPS6	NUP210		RAI1
FJX1	SLC1A6		GNA12
ELMO1	CCDC105		TRMT12
STAT4	VSTM2B		PHTF2
HIST1H2AD	POU4F3		TMEM60
HIST1H3D	NLRP9		FOXP2
HIST1H2BF	NPBWR1		CAV2
CACNA2D1	KLHDC4		DTWD2
PEG10	GP9		CD109
SGCE	ACR		SLC2A1
ZNF462	FCER2		PITPNC1
PSMD6	TMEM240		TPD52
SASH1	KRTAP5-6		NIPAL4
NTPCR	CYP2A7		SERPINB6
ASNSD1	TMEM184A		SERPINB9
ANXA2R	SPN		UBE2E1
CCDC112	ABHD17A		FBP1
CTTNBP2	OR13G1		GSTCD
ANGPT1	CHDH		PLK2
ME3	IL17RB		ARHGEF28
FRAS1	AIF1		LRRC17
GLIS3	KAT2A		RHOBTB1
PAWR	HSPB9		ARHGDIB
RNFT2	RASGEF1C		ZCRB1
C12orf49	CCDC87		COX7A2
MAP4K5	APOF		TUBE1
IFT43	CD300A		FAM229B
PGAP1	CECR2		ITGA1
SLC7A11	C1QTNF1-AS1		PELO
EIF5A2	OR7D4		HEATR5A
POPDC3	SHANK2		TANK
SULT1C4	UMOD		SCFD2
FOXP1	KRT20		OXR1
MECOM	TTC38		LRIG1
NPAS3	PKDREJ		AKTIP
HSPA8	VARS		CLTC
TRAK2	NPC1L1		GARS
SEC61B	SHH		PDP1
ALG2	ARHGAP22		ATP5S
CHD9	DHRS7C		L2HGDH
THOC1	KRT33B		TSN
ATL2	FBXO27		HOXD11
TMEM178A	CRIPAK		EVX2
CMSS1	GRIK3		MANSC1
DAB2	MARCO		AP1G2
KPNA5	GOLGA3		VCAM1
ENPP2	PCP2		PAIP1
SKIDA1	STXBP2		CPA5
CCDC7	RPS6KA4		TMED10
NUDT13	SEC14L6		FOXO3
ITPRIP	MLXIP		BTAF1
MED21	TGFBR3L		PTPN13
TCEANC	DBNDD2		MAPK10
SEPT7	TP53TG5		MTMR11
PEX2	TCP10L2		EFEMP1
MAB21L3	SLC22A6		MAGI2
SBF2	ABCC1		TNFRSF11B
BACH1	TCP10L		ATL1
PNMAL2	RBFOX1		LYL1
ARHGAP21	LRWD1		MANBA
FGFR2	ALKBH4		UFSP2
MDH1B	LY6G5B		SNX2
FASTKD2	MUC6		ABHD3
TRIM44	TYMP		MIB1
TMEM160	ODF3B		WLS
KAT6B	PDGFB		VEPH1
PCBD1	OR2G2		CXCL2
LIMA1	OR2M7		HIST1H1D
EFNB2	TEX37		GDPD1
SEMA6A	XCR1		HMGCR
ALDH1A1	ZG16B		MEOX2
NAPG	PLD6		MGP
PTGFRN	KRTAP3-3		PFKM
DERL1	POU2F2		SENP1
TBC1D31	PSG11		CDK14
CDK15	SIGLEC9		FAM114A1
ALG14	KRTAP10-3		IFT81
PABPN1	GRM6		SLC1A4
GLRX	KRT10		CLDN23
SP1	OR6F1		PIGF
BCL2L2	ZNF716		CRIPT
HOMEZ	BAIAP3		SCAF8
PPP1R3E	CEACAM16		TCF7L2
SIX1	NLRP13		HOXD13
AAGAB	COX6A2		MSMO1
IQCH	KRTAP4-11		IL6ST
SPRY4	YBX2		USP16
POLR3G	HPN		GNPDA1
PLIN2	TUBGCP6		CCKAR
GPR21	TRAPPC10		CORO2B
GMFB	GPRC5C		SRSF1
C15orf41	CD6		DIRAS3
GRK5	SHD		DDAH1
ADIPOR2	CYP4F2		CYR61
CYCS	PI3		RASGRP3
FANCC	NRXN2		PLD1
RPL37A	CEACAM1		BNIP1
EMP1	ABHD1		E2F3
FAM91A1	PHYHD1		DTD2
NUP160	CEP170B		RIPK2
NAV1	FSD1		NAV3
BMP2	TMIGD2		NFKB1
BMF	IL2RB		TMEM41B
RAB8B	GPR68		CYP24A1
BRWD1	TMEM214		PTPN1
CNN3	ITPR3		TYW5
ERAP2	IFITM1		RFC3
MCU	C1orf167		EFCAB13
SACS	HAPLN4		TLE1
BRE	VMO1		SNX11
RBKS	GLTPD2		CBX1
VAPA	LPO		CASC4
AUNIP	ZNF600		ZFP36L2
CLDND1	SIRPB1		RBM26
SPAG17	PNMA5		PSMB5
HPGD	PRDM12		DDX20
SSBP2	SGSH		FAM212B
E2F8	SLC26A11		CCNL1
DNAJC10	TUBB4A		ANTXR2
REPS1	LRFN1		CLGN
CMAS	CCR6		CTNNA1
STAT1	B4GALNT2		LRP6
PELI1	ZDHHC8		MSRB3
CTNNBL1	CSF3R		DNAJC15
EDEM3	UGT1A5		C15orf53
ULK4	UGT1A6		CLEC16A
NLGN1	RGS14		IRF6
CORIN	PLA2G16		DTNA
BMP2K	ITGAM		DPT
RASA1	KRT33A		PERP
ZSCAN9	MRI1		TMEM246
EIF4G2	ZNF114		TPT1
EIF3M	IGLON5		SIX6
CLASP2	RABL2B		DNM1L
TES	ATP2A3		ZBED6
PHF19	ITSN2		ZC3H11A
KPNA3	TACR2		RAB1A
C1D	TGM5		ANXA13
KLHL8	DPEP1		LDLRAD4
SYNPO2	CHST4		HIST1H3E
LSMEM1	ATAD3C		CPED1
TCP11L2	EDF1		MYCBP2
CHST11	ABCC8		SLC5A3
SYT4	TGFB1		MRPS6
NUP54	SIGLEC14		FJX1
NUDT17	SIGLEC5		CLCA2
TP53BP2	TPTE2		TEX2
FSTL1	SCGB3A1		ELMO1
NKAIN2	PLCH2		STAT4
C11orf52			HIST1H2AD
HSPB2-C11orf52			HIST1H3D
HSPB2			HIST1H2BF
FERMT2			CACNA2D1
BBS12			PEG10
UBE2D2			SGCE
BAG4			ZNF462
LSM1			PSMD6
ST3GAL1			SASH1
PLEKHG3			NTPCR
RPS6KA5			ASNSD1
C14orf159			ANXA2R
TOP2A			CCDC112
ATP5O			DTNBP1
NABP1			RCAN2
HIVEP1			CTTNBP2
KMT2E			ANGPT1
ADAMTS12			ME3
MRC2			FRAS1
PIF1			PAWR
LYSMD3			RNFT2
YAE1D1			C12orf49
USP47			MAP4K5
KCNJ8			IFT43
TUBA1A			PGAP1
TUBA1C			SLC7A11
DCN			EIF5A2
HTATSF1			POPDC3
HNRNPU			SULT1C4
RAB23			FOXP1
LUM			MECOM
MRPS30			NPAS3
LHX2			ERGIC1
CXCR4			KCTD18
TOMM20			RBPMS2
UBE2V1			HSPA8
ABT1			TRAK2
RASAL2			SEC61B
GCFC2			ALG2
GLS			IL17RD
IMPA1			CHD9
LDHB			THOC1
SOX5			MEST
GPX8			PDE4B
SAMD5			TMEM178A
SRD5A3			CMSS1
PCDH9			DAB2
NDUFV2			KPNA5
PROX1			PON3
PPM1L			ENPP2
DNAJC18			SKIDA1
BPGM			CCDC7
DPM2			NUDT13
NRDE2			ITPRIP
NDC80			MED21
METTL4			TCEANC
CPSF3			SEPT7
ITGB1BP1			PEX2
AFAP1L1			MAB21L3
MCM3			SBF2
COL12A1			BACH1
ID2			MAPKAPK2
BTBD8			BSPRY
SF3B5			ARHGAP21
MTMR7			MDH1B
FOS			FASTKD2
KIF13A			TRIM44
CEP57L1			TMEM160
SESN1			KAT6B
STARD10			PCBD1
LYPLAL1			LIMA1
SSFA2			ASAP2
NAA50			TBC1D2B
ATP6V1A			SH2D7
MTHFD2L			EFNB2
BASP1			SEMA6A
GHR			ALDH1A1
PRELID2			TMEM63C
RAB18			NAPG
VCL			PTGFRN
ATF7IP			DERL1
DIEXF			TBC1D31
TARBP1			CDK15
CEP97			PRDM11
CHST2			ALG14
COX20			ZBTB24
SETD7			TNFAIP3
RSPO2			GLRX
MEX3B			SP1
UNC80			BCL2L2
SDAD1			HOMEZ
FEM1C			SIX1
SLC25A27			AAGAB
CYP39A1			IQCH
ALX1			SPRY4
ALCAM			ASIC4
NR6A1			POLR3G
IPO9			JAZF1
MRPL33			PLIN2
RBM22			GPR21
FAM53B			GMFB
BOD1			C15orf41
MYLIP			GRK5
MPC2			ZBTB34
DCAF6			ADIPOR2
NEK7			CYCS
ACTN2			FANCC
HEATR1			DGKZ
CRYBG3			RPL37A
SLC2A2			EMP1
HSD17B11			FAM91A1
CASP6			NUP160
FAM185A			NAV1
LETM2			ACVR1C
CAAP1			ERVFRD-1
ENDOD1			LYZ
DERA			BMP2
FBN1			RAB8B
PPARGC1A			BRWD1
CARD6			CNN3
RPL37			ERAP2
KLHL31			PALD1
FAM84B			MCU
TTF2			SACS
COLEC12			RBKS
LSAMP			VAPA
OPA1			COL15A1
TMEM155			AUNIP
SCAMP1			RNF149
FER			INHA
STC2			OBSL1
FBXW2			CLDND1
NRP1			SPAG17
IFIT1			HPGD
GOLPH3			SSBP2
CTIF			E2F8
NGLY1			DNAJC10
PRDM8			PDGFRB
ISL1			REPS1
FGFR1OP2			CMAS
PHLPP1			COPZ2
GNG5			STAT1
MAGI1			DKK3
PPIL6			PELI1
SMPD2			CTNNBL1
RNF217			EDEM3
TMEM55A			PYCR2
WEE1			LEFTY2
NUFIP2			ULK4
LTN1			NLGN1
MAST4			CORIN
MSI2			BMP2K
HS2ST1			RASA1
PHGDH			ZSCAN9
LRRC28			TMEM140
TTC23			EIF4G2
SMAD5			EIF3M
ECM2			PTPRR
DIRC3			CLN5
CDKAL1			FHL1
ADRA1A			CLASP2
GNG2			TES
GNAQ			PHF19
RPS3A			KPNA3
FAM98A			C1D
TBR1			GPD2
SLC4A7			KLHL8
FBXL5			SYNPO2
FAM200B			TCP11L2
CNOT6L			CKAP4
CDK6			CHST11
ITGB1			MAN1C1
FRS2			CA12
ESR2			SYT4
DIS3			NUP54
PIBF1			NUDT17
ANKRD55			TP53BP2
PIM1			FSTL1
LAMC1			NKAIN2
GNS			C11orf52
EEPD1			HSPB2-C11orf52
SIK3			HSPB2
CORO1C			FERMT2
EXTL1			BBS12
B4GALT5			UBE2D2
SLC25A28			BAG4
SPATA24			LSM1
ZFHX3			ST3GAL1
MCM5			PLEKHG3
NUFIP1			RPS6KA5
GPALPP1			C14orf159
ZFAT			SCARB1
USP54			TOP2A
NT5C3A			ATP5O
HEY1			NABP1
HPSE2			FOXO1
MDK			HIVEP1
LAMC2			KMT2E
CEP63			FAM102A
ADAT2			RFTN1
PEX3			ADAMTS12
DLX5			MRC2
RRAGA			PIF1
RCN2			LYSMD3
SSH1			YAE1D1
ESCO1			USP47
CPEB4			KCNJ8
TMEM50A			TUBA1A
NAB1			TUBA1C
FST			HTATSF1
SNCAIP			HNRNPU
INTS10			RBM45
TRIQK			RAB23
RC3H2			FAS
ECD			LUM
FAM149B1			MRPS30
RMDN3			LHX2
TCF12			CXCR4
ZNF280D			RRBP1
CXorf58			TOMM20
APOO			UBE2V1
SCN2A			ABT1
HNRNPA3			RASAL2
EIF2A			GCFC2
FAM26F			IMPA1
LRP12			LDHB
TENM4			SOX5
CHPF			GPX8
TMEM198			SAMD5
PLN			SRD5A3
ITGB8			PCDH9
LMOD3			CLN6
SETD9			NDUFV2
LIX1			VAV3
AHI1			PROX1
CCNE2			PPM1L
NDUFAF6			DNAJC18
STK38L			BPGM
IKBIP			DPM2
APAF1			PAX6
YES1			NRDE2
PLCB4			NDC80
TTLL7			METTL4
DLC1			FERMT1
ABCA5			CPSF3
NTS			ITGB1BP1
RMI1			AFAP1L1
HNRNPK			MCM3
VPS4B			COL12A1
RALGPS2			ID2
MRPL35			BTBD8
IMMT			ADCY5
IRF2			SF3B5
ANKRD37			CPA1
HMGN4			MTMR7
KLF14			FOS
PLEKHF2			NAA20
PRDX3			DNASE2B
CREBRF			KIF13A
FGD4			CAPZB
PI4K2B			CEP57L1
SEPSECS			SESN1
CDCA2			TGFBI
KCTD9			STK24
SLIT3			ARAP1
VEGFA			STARD10
BCO2			TMEM206
CALCOCO1			LYPLAL1
FDX1			SSFA2
GSTZ1			NAA50
POMT2			ATP6V1A
C1orf162			MTHFD2L
OTUD7B			BASP1
VEGFC			GHR
KLF12			PRELID2
C8orf44-SGK3			DEC1
VCPIP1			WDR38
MCRS1			RAB18
RSRC1			ATF7IP
C4orf46			DIEXF
ETFDH			TARBP1
PPWD1			CEP97
CENPK			CHST2
PTCH1			COX20
YEATS4			SETD7
TARS			RSPO2
PMF1			MEX3B
PMF1-BGLAP			CASQ2
RPS24			UNC80
POLR3A			SDAD1
FAM98B			FEM1C
CCDC88A			SLC25A27
EMC2			CYP39A1
CACNB2			ALX1
BCAT1			ALCAM
VWA8			NR6A1
ANXA4			IPO9
RSPH3			MRPL33
LPAR3			RBM22
TTC27			PIP4K2A
SOWAHC			FAM53B
SEPT10			BOD1
PLSCR5			MYLIP
SKIL			MPC2
SPARCL1			DCAF6
TIGD2			NEK7
FAM13A			ACTN2
ITGA2			HEATR1
CCNH			CRYBG3
MLIP			SLC2A2
SENP6			HSD17B11
HEY2			CASP6
INHBA			GPX3
KIAA1456			FAM185A
BBOX1			LETM2
CEP57			CAAP1
FAM76B			ENDOD1
FAM216A			DERA
SLC25A30			FBN1
FNDC3A			TSC22D3
DACH1			PPARGC1A
ABCA8			CARD6
SCAF1			RPL37
TCF7L1			KLHL31
EPHA4			TTF2
TNKS			SYTL2
ZFHX4			COLEC12
C9orf170			LSAMP
PLXDC2			ATP13A4
POSTN			OPA1
POU4F1			TMEM155
HABP4			SCAMP1
ZNHIT6			FER
FOXN2			STC2
CLK1			FBXW2
ZNF737			NRP1
CAMK1G			IFIT1
GPRIN3			GOLPH3
NT5DC1			NGLY1
HBP1			PRDM8
CALD1			ISL1
FGFBP3			FGFR1OP2
PICALM			PHLPP1
TMTC1			GNG5
CCT2			MAGI1
TDRD3			PPIL6
XPO1			SMPD2
MAP2K6			RNF217
TMEM79			TMEM55A
TBCC			WEE1
PIGY			NUFIP2
PYURF			LTN1
HERC3			MAST4
ARSG			MSI2
APOL2			HS2ST1
RARA			LGALSL
DSCC1			ZDHHC14
MTMR12			LRRC28
CYSLTR2			TTC23
VPS54			SMAD5
COL6A3			ECM2
PPA2			DIRC3
TMEM74			CDKAL1
SMG8			ADRA1A
ATPAF2			CCDC60
GID4			GNG2
DST			GNAQ
BEND6			RPS3A
CNIH1			PHLDA3
KATNAL1			FAM98A
ETV1			TBR1
KCNJ5			SLC4A7
RTKN2			FBXL5
RCN1			FAM200B
SLC35F1			CNOT6L
SLC18B1			ENPP1
TWISTNB			TMOD1
PSME4			ITGB1
ACYP2			ESR2
SPTBN1			DIS3
FHOD3			PIBF1
ASF1A			TINAG
DR1			ANKRD55
SERTAD2			PIM1
ORC2			C6orf223
FBXL13			ITGA11
ARMC10			LAMC1
WBP4			GNS
ELF1			EEPD1
ETFA			SIK3
THUMPD1			CORO1C
SLC9B1			EXTL1
ADAMTS14			TMEM154
KCNQ5			B4GALT5
GEM			SLC25A28
CASP10			SPATA24
MAP2			ZFHX3
TAF7			TLDC1
AKIRIN2			HMOX1
COL28A1			MCM5
SMC3			NUFIP1
AHDC1			GPALPP1
UGGT2			ZFAT
TRA2B			USP54
SPDL1			RUFY4
SUCLA2			P2RY2
NUDT15			NT5C3A
NELFCD			HEY1
PTPRM			STRBP
ERMAP			HPSE2
HIST1H2AJ			MDK
HIST1H2BM			DHRS12
HSPA2			LAMC2
MTRF1			CEP63
EIF2B2			ADAT2
ZC2HC1C			PEX3
PAPPA			DLX5
KBTBD4			RRAGA
MB			TESC
FHIT			RCN2
LEKR1			SSH1
PHOX2B			ESCO1
METTL2B			CPEB4
INTS8			TMEM50A
TSFM			ANKRD35
BTG3			NAB1
IVNS1ABP			FST
STK17B			SNCAIP
PARD3B			INTS10
RBMS3			TRIQK
TMEM30A			RC3H2
ELAVL2			ECD
FIBIN			FAM149B1
CAPS2			RMDN3
GLIPR1L2			TCF12
COL25A1			ZNF280D
EXO1			CXorf58
CRTAP			APOO
FBXW7			SCN2A
STARD3NL			HNRNPA3
ANXA7			EIF2A
CTDSP2			FAM26F
DCAF7			LRP12
STX6			CHPF
TBX5			TMEM198
SIX4			ITGB8
DISP1			LMOD3
ATPIF1			SETD9
RAVER2			NOTCH2
DEPDC1			LIX1
RWDD3			AHI1
TTC21B			CCNE2
TFDP2			NDUFAF6
TDO2			ZNF485
ZSWIM6			STK38L
LNPEP			IKBIP
AGR3			APAF1
PTPN12			YES1
HILPDA			PLCB4
STAR			TTLL7
FAM160B1			ABCA5
KLHL42			NTS
EFS			CHST3
MICAL3			RMI1
GFPT1			HNRNPK
HNMT			VPS4B
GULP1			KANK4
SOBP			RALGPS2
STAMBPL1			MRPL35
MGST1			IMMT
TWF1			IRF2
USP45			ANKRD37
CPB1			HMGN4
SUPT3H			KLF14
LIN7A			PLEKHF2
ASAH2B			SLC35C1
MAGEF1			MALT1
TRIM27			PRDX3
SCARB2			CREBRF
RANBP3L			FGD4
CPVL			PI4K2B
FKBP14			SEPSECS
PLEKHA8			CDCA2
DHRS3			KCTD9
SPC25			SLIT3
CPO			VEGFA
PHACTR1			BCO2
TRIM32			CALCOCO1
DDX47			FDX1
LIG4			GSTZ1
ABHD13			POMT2
CAPN14			LRRC8D
EHD3			C1orf162
MCM6			OTUD7B
NUSAP1			VEGFC
OIP5			MCIDAS
IFI44L			MLNR
PIAS3			KLF12
GMCL1			C19orf24
SLC4A10			C8orf44-SGK3
NXPE3			VCPIP1
CCDC158			PRPF40B
HIST1H4C			MCRS1
KIAA0408			RGS8
ASAH1			SHOX2
RUSC2			RSRC1
CCDC91			C4orf46
PIN4			ETFDH
ZIC5			PPWD1
GPBP1L1			CENPK
TMEM69			PMP2
IFI44			PTCH1
ODF2L			YEATS4
STXBP3			SMG6
FMO4			SRR
DARS			TARS
GALNT5			HEBP2
IRS1			DRAM1
ANAPC13			PMF1
ATR			PMF1-BGLAP
GMPS			GYG1
SLC9B2			RPS24
PRSS12			POLR3A
ANXA5			FAM98B
PJA2			C1orf137
HIST1H4B			CCDC88A
TFAP2B			EMC2
PDE7B			CACNB2
TFB1M			BCAT1
IMMP2L			SLC2A13
LRRCC1			VWA8
NAA35			ANXA4
FAM208B			PBX3
SLC1A2			RSPH3
USP28			LPAR3
GPC5			TTC27
ACYP1			SOWAHC
C15orf57			SEPT10
SCG3			FZD7
RPL24			SKIL
CD200			SPARCL1
ENC1			FAM13A
HEXB			ITGA2
UBE3D			CCNH
DOPEY1			SENP6
LTV1			HEY2
KPNA2			INHBA
NMNAT2			CH25H
CCDC146			TMEM9B
OGFOD2			BBOX1
PSMD5			CEP57
USP3			FAM76B
SPG21			FAM216A
RAB2A			SLC25A30
HECTD1			FNDC3A
ECH1			ABCA8
FRMD3			SCAF1
THNSL1			BCAS1
IDNK			TCF7L1
PPP2R1B			TNKS
RPF2			ZFHX4
SNX4			C9orf170
ZBTB25			PLXDC2
ZBTB1			POSTN
DENND5A			POU4F1
APIP			UCP1
PDHX			HABP4
ZFP64			FBXO18
RMI2			ANKRD16
TSEN15			ZNHIT6
EIF2D			FOXN2
DESI2			CLK1
RDX			HPS1
PSMB3			ZNF737
PCGF2			CAMK1G
WNT5A			NENF
CLEC7A			GPRIN3
ELMSAN1			NT5DC1
MTPAP			HBP1
RRS1			CALD1
TMEM100			FGFBP3
SMC5			PICALM
CCT5			CCT2
FAM173B			TDRD3
SQLE			XPO1
CCDC28A			PYGL
EXTL3			MAP2K6
ENOSF1			CPA4
NRBF2			PMP22
RHEBL1			TMEM79
TFAP4			SMG5
DBF4B			IRF1
ABCA1			TBCC
GFM2			PIGY
NSA2			PYURF
CENPL			HERC3
SNX9			TP53INP1
PTN			ARSG
GSR			EMID1
SYCP2L			APOL2
TMEM14B			RARA
PPP3CA			DSCC1
SEC24D			MTMR12
LRRC1			CYSLTR2
FBXW11			VPS54
DENND4A			COL6A3
RNF24			PPA2
TEX14			TMEM74
RAD51C			HDHD3
CLIC4			MRVI1
ACOT11			SMG8
HIST2H2AA3			OLFML2A
TNFSF4			ATPAF2
RNF2			GID4
PCBP1			DST
PIK3R4			BEND6
ACAD11			CNIH1
NAALADL2			KATNAL1
C3orf70			ETV1
FIP1L1			KCNJ5
CCDC152			C5orf64
ARHGEF37			SERPINB1
FAM46A			RTKN2
MOXD1			RCN1
ZNRF2			ALDH1L2
HGF			RPL26L1
SLC10A5			SLC35F1
ZBTB26			SLC18B1
NSUN6			TWISTNB
LUZP2			PSME4
TIGD3			ACYP2
MSANTD4			SPTBN1
DCPS			FHOD3
ZFC3H1			CHL1
METTL25			ASF1A
CCDC59			DR1
KBTBD6			SERTAD2
L3HYPDH			ORC2
JKAMP			FBXL13
PEX26			ARMC10
LAPTM4A			RGCC
DUSP19			WBP4
STK11IP			ELF1
ABI3BP			DGKH
HIST1H3A			ETFA
HIST1H4A			THUMPD1
HIST1H1A			NMT2
SNX14			TGIF1
SP8			SLC9B1
KLRC4			ADAMTS14
KLRC4-KLRK1			KCNQ5
ZNF516			GEM
JAK1			CASP10
FRYL			MAP2
ADH4			KDR
HCRTR2			TAF7
ORC5			AKIRIN2
EBPL			COL28A1
PPP1CB			SMC3
HIST1H2BK			SMURF2
HIST1H2AH			AHDC1
SMPDL3A			B3GNT2
NCKAP5L			CASP8
EID3			UGGT2
HAUS4			TRA2B
RPUSD2			SPDL1
MAF			C10orf11
DLX6			CLMP
AKAP7			SUCLA2
FAM168A			NUDT15
SNX30			NELFCD
DLGAP5			PFKFB3
SERINC4			PTPRM
SNRPD3			CTSZ
GUCD1			ERMAP
RHBDD3			HIST1H2AJ
EWSR1			HIST1H2BM
GNG12			HSPA2
ALS2CR12			PLCXD3
ABHD10			MTRF1
GRIA1			EIF2B2
RPA3			ZC2HC1C
ZNF483			PAPPA
CYP2R1			KBTBD4
ROCK1			MB
FHL2			FHIT
LMCD1			LEKR1
STX16-NPEPL1			PHOX2B
STX16			METTL2B
ATP6V0E1			INTS8
NET1			TSFM
UBE2H			BTG3
MYCBPAP			IVNS1ABP
SAP30			STK17B
RPL5			PARD3B
SLC25A44			RBMS3
LEPROTL1			TMEM30A
ATF7			ELAVL2
SYT1			FIBIN
GTF2F2			CAPS2
RBM25			GLIPR1L2
KNOP1			COL25A1
RAP2B			MAN2A2
TSPAN5			USP18
SNRPD1			EXO1
ATP6V1E2			CRTAP
RHOQ			FBXW7
VGLL4			STARD3NL
CWC27			ANXA7
SREK1IP1			DCAF7
TXLNB			GREB1L
IL6			STX6
ZNF706			PTPRJ
ZNF79			HEBP1
DLAT			ALDH1B1
CDC7			TM4SF4
RAD1			TBX5
BRIX1			DISP1
ZNF165			MTFR1L
MEP1A			ATPIF1
SH3BGRL2			DNAJC8
CSRP3			RAVER2
PTPRO			DEPDC1
NCAM1			RWDD3
TARBP2			TTC21B
RNASEL			HGD
DYRK3			TFDP2
MYH15			TDO2
GFM1			ZSWIM6
FNDC3B			LNPEP
DDX60			HBEGF
CEP44			AGR3
FBXO8			PTPN12
COPS5			HILPDA
NOV			STAR
TAF2			GSTO1
ACCS			FAM160B1
HIST4H4			KLHL42
TMBIM4			EFS
NUTM1			MICAL3
SLC12A6			GFPT1
NOP10			HNMT
SCN3A			GULP1
TTC30B			NAAA
SCG2			SOBP
PLEKHG1			STAMBPL1
POLR2K			MGST1
FBXO43			TWF1
TMEM106C			USP45
OSBPL8			CPB1
PROSER1			SUPT3H
NHLRC3			LIN7A
GDAP1			NR3C1
GUCY1A2			ASAH2B
SEMA4F			MAGEF1
KIF1B			TRIM27
SSX2IP			CHRNA1
GORAB			SCARB2
CNRIP1			RANBP3L
C5orf51			CPVL
SIM1			FKBP14
ZFP91-CNTF			PLEKHA8
LPXN			DHRS3
ZFP91			SPC25
KITLG			ST3GAL6
CCDC175			TRIM32
HMCN1			DDX47
SETBP1			LIG4
TMEM259			ABHD13
SRBD1			SLC22A15
NHSL1			CAPN14
SEC11C			EHD3
OSBPL3			NUSAP1
CD34			OIP5
KDM3A			IFI44L
RFX8			PIAS3
CLASP1			GMCL1
CSRNP3			LYPD6B
OXSM			SLC4A10
SENP7			LRP2
CLOCK			NXPE3
ARHGAP24			HIST1H4C
ALDH7A1			KIAA0408
ADAMTS19			ASAH1
RSPH4A			RUSC2
TERF1			CCDC91
ANXA1			PIN4
ALDOB			RAPGEF1
TXNDC8			ZIC5
CASP12			ZIC2
KBTBD7			DOCK9
CDADC1			GPBP1L1
PRMT5			TMEM69
AJUBA			IFI44
PRPF39			ODF2L
C14orf39			STXBP3
MTHFD1			FMO4
PSMC3IP			LEFTY1
PRR11			DARS
SKA2			GALNT5
TIMP3			IRS1
B3GALT2			C3orf52
FIGN			ANAPC13
KCNE4			ATR
STT3B			GMPS
PLOD2			SLC9B2
CAPSL			PRSS12
EPB41L4A			ANXA5
EPB41L4A-AS2			PJA2
JAKMIP2			KCNIP1
SH3TC2			HIST1H4B
GLRA1			PDE7B
DMTF1			MAP3K5
PDIA4			TFB1M
CA8			IMMP2L
SPRY2			LRRCC1
CXXC4			KCNS2
CCNT2			NAA35
RCAN1			FAM208B
OXNAD1			SWAP70
AGTPBP1			SLC1A2
ZFR			USP28
OAZ2			GPC5
TTC7A			ACYP1
RHEB			DLST
TSC22D1			C15orf57
NGRN			SCG3
FBXL22			RPL24
RPF1			ENC1
FAM69A			HEXB
DPH5			UBE3D
FAM46C			DOPEY1
NUCKS1			LTV1
H3F3A			KPNA2
HAT1			NMNAT2
PLCL1			GCH1
POPDC2			CCDC146
AFM			C9orf135
ZNF300			OGFOD2
DCTN4			PSMD5
TBX18			USP3
VTA1			SPG21
MTBP			RAB2A
MRPL13			HECTD1
TOPORS			LRRC4
ZNF510			ECH1
SMNDC1			FRMD3
CHD4			THNSL1
ABCD2			ENKUR
SCN8A			GLOD4
KERA			IDNK
SLC38A6			PPP2R1B
TRMT5			RPF2
GOSR2			SNX4
MRPL10			ZBTB25
LRRC46			ZBTB1
RSAD1			HSPB8
DHX40			DENND5A
ZNF431			APIP
RGS4			PDHX
SDPR			ZFP64
SLC39A10			SOCS1
KAT2B			RMI2
FGF12			TSEN15
INTS12			EIF2D
NPNT			DESI2
AP1AR			NIT2
SNX24			FRMD8
KIAA1586			RDX
PPP1R9A			PSMB3
NAT2			PCGF2
FREM1			WNT5A
CDK1			CLEC7A
CACNA1G			ELMSAN1
PHF6			MTPAP
UBA3			ABHD17C
SPEF1			RRS1
MAB21L2			ADHFE1
EDIL3			ONECUT1
SNX13			NAP1L5
SP4			CA2
NIPSNAP3A			ITIH2
ACSS3			TMEM100
TTN			SMC5
SCLT1			CCT5
C4orf33			FAM173B
ZC2HC1B			RBM47
ARHGAP6			SQLE
CDH6			CCDC28A
RNF152			EXTL3
NFU1			CHST14
MARS2			ENOSF1
ATP13A3			SLC38A10
SCD5			NRBF2
UTP15			RHEBL1
ANKRA2			TFAP4
RPP30			DBF4B
ENO1			CLDN11
UBAP1			ABCA1
C10orf67			GFM2
FBXO34			NSA2
VPS29			C15orf62
RAD9B			CENPL
CYYR1			SNX9
PPP1R3B			PTN
MED24			GSR
MANBAL			SYCP2L
EFCAB5			TMEM14B
SSH2			PPP3CA
KCNN3			SEC24D
ANKS1A			LRRC1
TAF11			FBXW11
YWHAZ			YY1
FAM126B			DENND4A
NDUFB3			RNF24
HINT2			CRYBB1
MKX			COL27A1
			TEX14
			RAD51C
			CLIC4
			ACOT11
			HIST2H2AA3
			TNFSF4
			RNF2
			PCBP1
			PIK3R4
			ACAD11
			NAALADL2
			C3orf70
			FIP1L1
			CCDC152
			FAM13B
			ARHGEF37
			FAM46A
			MOXD1
			WIPI2
			ZNRF2
			HGF
			ZBTB26
			NSUN6
			LUZP2
			TIGD3
			MSANTD4
			DCPS
			DHH
			ZFC3H1
			METTL25
			CCDC59
			KBTBD6
			L3HYPDH
			JKAMP
			BLVRB
			PEX26
			LAPTM4A
			DUSP19
			STK11IP
			ABI3BP
			TBC1D1
			HIST1H3A
			HIST1H4A
			HIST1H1A
			SNX14
			NOX4
			SP8
			ZNF516
			SNAI1
			MCFD2
			JAK1
			FRYL
			ORC5
			DOCK10
			EBPL
			PPP1CB
			HIST1H2BK
			HIST1H2AH
			SMPDL3A
			NFRKB
			NCKAP5L
			EID3
			HAUS4
			RPUSD2
			MAF
			DLX6
			GSX2
			AKAP7
			FAM168A
			SNX30
			C12orf42
			COBL
			RGS16
			C2orf91
			DLGAP5
			APOL6
			AQP4
			SNRPD3
			RHBDD3
			EWSR1
			FAM129B
			GNG12
			ALS2CR12
[truncated: 289 more rows]

## Sheet: Genesets - GO Enrich
ADULT-BIASED Regions – Promoter Accessibility GENES – GO BP Enrichments:											OLD-BIASED Regions – Promoter Accessibility GENES – GO BP Enrichments:
ID	Description	GeneRatio	BgRatio	pvalue	p.adjust	qvalue	geneID	Count			ID	Description	GeneRatio	BgRatio	pvalue	p.adjust	qvalue	geneID	Count
GO:0031424	keratinization	36/875	198/14662	1.66817e-09	4.32504e-06	4.32504e-06	23581/3850/3852/3885/51350/338785/387264/319101/3888/3853/3848/386680/26085/84518/196374/5493/386676/353333/374454/3849/112802/3890/286887/121391/386679/386677/440023/54474/3884/85293/386682/3858/653240/5266/3883/9333	36			GO:0050907	detection of chemical stimulus involved in sensory perception	22/199	324/14662	5.38845e-10	1.16768e-06	1.15653e-06	283694/8390/1469/125958/81466/125962/1470/391192/81341/390064/125963/26539/392376/401665/390437/390882/26658/390061/26493/283162/26189/765	22
GO:0070268	cornification	25/875	105/14662	1.77401e-09	4.32504e-06	4.32504e-06	23581/3850/3852/3885/51350/338785/319101/3888/3853/3848/26085/196374/5493/374454/3849/112802/3890/286887/121391/54474/3884/3858/5266/3883/9333	25			GO:0009593	detection of chemical stimulus	22/199	357/14662	3.30567e-09	3.45562e-06	3.42263e-06	283694/8390/1469/125958/81466/125962/1470/391192/81341/390064/125963/26539/392376/401665/390437/390882/26658/390061/26493/283162/26189/765	22
GO:0008544	epidermis development	50/875	422/14662	2.60014e-06	0.00253566	0.00253566	79755/125981/23581/3850/3852/247/3885/51350/338785/387264/319101/3888/3853/3848/386680/79152/26085/5650/23513/3714/84518/196374/5493/7124/80736/386676/353333/374454/3849/112802/3890/2709/9368/286887/7538/121391/386679/386677/5459/440023/54474/6469/3884/85293/386682/3858/653240/5266/3883/9333	50			GO:0007606	sensory perception of chemical stimulus	22/199	368/14662	5.77628e-09	3.45562e-06	3.42263e-06	283694/8390/1469/125958/81466/125962/1470/391192/81341/390064/125963/26539/392376/401665/390437/390882/26658/390061/26493/283162/26189/765	22
GO:0043588	skin development	46/875	383/14662	4.54222e-06	0.00369131	0.00369131	50509/125981/23581/3850/3852/247/3885/51350/338785/387264/319101/3888/3853/3848/386680/79152/26085/84518/196374/5493/7124/386676/353333/374454/9509/4050/3849/112802/3890/286887/7538/121391/386679/386677/6261/440023/54474/6469/3884/85293/386682/3858/653240/5266/3883/9333	46			GO:0008631	intrinsic apoptotic signaling pathway in response to oxidative stress	5/199	38/14662	0.000152753	0.0370974	0.0367433	3717/3315/90441/8876/56616	5
ADULT-BIASED Regions – Promoter Intersection GENES – GO BP Enrichments:											GO:1990868	response to chemokine	7/199	85/14662	0.000154073	0.0370974	0.0367433	81704/6369/6360/6348/1230/6363/3579	7
ID	Description	GeneRatio	BgRatio	pvalue	p.adjust	qvalue	geneID	Count			GO:1990869	cellular response to chemokine	7/199	85/14662	0.000154073	0.0370974	0.0367433	81704/6369/6360/6348/1230/6363/3579	7
GO:0031424	keratinization	31/290	151/12683	3.76946e-21	9.90615e-18	9.73315e-18	23581/3850/3885/51350/387264/319101/3888/3853/3848/386680/26085/84518/196374/386676/353333/374454/3849/112802/3890/286887/121391/386677/440023/54474/85293/386682/3858/653240/5266/3883/9333	31			OLD-BIASED Regions – Promoter Intersection GENES – GO BP Enrichments:
GO:0043588	skin development	35/290	313/12683	5.30721e-15	2.78947e-12	2.74075e-12	125981/23581/3850/247/3885/51350/387264/319101/3888/3853/3848/386680/26085/84518/196374/7124/386676/353333/374454/3849/112802/3890/286887/121391/386677/6261/440023/54474/85293/386682/3858/653240/5266/3883/9333	35			ID	Description	GeneRatio	BgRatio	pvalue	p.adjust	qvalue	geneID	Count
GO:0008544	epidermis development	36/290	340/12683	1.16413e-14	5.09887e-12	5.00983e-12	125981/23581/3850/247/3885/51350/387264/319101/3888/3853/3848/386680/26085/5650/84518/196374/7124/386676/353333/374454/3849/112802/3890/2709/286887/121391/386677/440023/54474/85293/386682/3858/653240/5266/3883/9333	36			GO:0050907	detection of chemical stimulus involved in sensory perception	6/42	177/12683	2.3464e-05	0.0100582	0.00940722	1469/125958/81341/26539/390437/390882	6
GO:0050907	detection of chemical stimulus involved in sensory perception	22/290	177/12683	9.72621e-11	3.6515e-08	3.58773e-08	1470/284433/1469/1472/125963/26538/389090/26245/26658/26532/26333/26539/26696/341152/138883/8390/126370/81341/125958/81470/343169/4025	22			GO:0009593	detection of chemical stimulus	6/42	206/12683	5.49882e-05	0.0100582	0.00940722	1469/125958/81341/26539/390437/390882	6
GO:0007606	sensory perception of chemical stimulus	23/290	211/12683	5.17133e-10	1.69878e-07	1.66911e-07	1470/284433/1469/1472/125963/26538/389090/26245/26658/26532/26333/26539/26696/29991/341152/138883/8390/126370/81341/125958/81470/343169/4025	23			GO:0007606	sensory perception of chemical stimulus	6/42	211/12683	6.2837e-05	0.0100582	0.00940722	1469/125958/81341/26539/390437/390882	6
GO:0009593	detection of chemical stimulus	22/290	206/12683	1.84094e-09	5.37554e-07	5.28167e-07	1470/284433/1469/1472/125963/26538/389090/26245/26658/26532/26333/26539/26696/341152/138883/8390/126370/81341/125958/81470/343169/4025	22			GO:0050906	detection of stimulus involved in sensory perception	6/42	214/12683	6.79609e-05	0.0100582	0.00940722	1469/125958/81341/26539/390437/390882	6
GO:0051606	detection of stimulus	24/290	346/12683	1.34549e-06	0.000271997	0.000267247	23746/1470/284433/1469/1472/133060/125963/26538/389090/26245/26658/26532/26333/26539/26696/341152/138883/8390/126370/81341/125958/81470/343169/4025	24			GO:0051606	detection of stimulus	7/42	346/12683	0.000125402	0.0144468	0.0135118	1469/125958/81341/26539/390437/390882/5985	7
GO:0006959	humoral immune response	15/290	149/12683	1.58818e-06	0.000298125	0.000292918	100423062/140683/92747/3853/2219/3848/5650/1670/4049/7124/51297/930/2208/5266/1235	15
GO:0019373	epoxygenase P450 pathway	5/290	13/12683	6.68584e-06	0.00117136	0.0011509	1553/1572/1548/1549/8529	5
GO:0042738	exogenous drug catabolic process	5/290	15/12683	1.50237e-05	0.00246764	0.00242454	4842/1553/1572/1548/1549	5			YOUNG-BIASED Regions – Promoter Accessibility GENES – GO BP Enrichments:
GO:0051346	negative regulation of hydrolase activity	21/290	337/12683	3.17484e-05	0.00490793	0.00482222	57662/1470/1469/121256/1472/10507/116729/128821/145264/4842/284257/8530/5076/392617/7124/128817/23504/10816/140880/116154/5266	21			(no significant results)
GO:0018149	peptide cross-linking	7/290	42/12683	4.12802e-05	0.0060269	0.00592165	343641/3848/3849/116179/3858/5266/9333	7
GO:0002250	adaptive immune response	18/290	278/12683	7.18378e-05	0.00943949	0.00927464	100423062/27040/3903/79908/339390/30835/3135/7462/4049/7124/11024/970/930/441864/2208/6693/923/1235	18			YOUNG-BIASED Regions – Promoter Intersections GENES – GO BP Enrichments:
GO:0010923	negative regulation of phosphatase activity	9/290	87/12683	0.00016244	0.0194277	0.0190884	57662/121256/10507/116729/284257/392617/7124/23504/116154	9			(no significant results)
GO:0002922	positive regulation of humoral immune response	4/290	13/12683	0.000162637	0.0194277	0.0190884	5650/4049/7124/2208	4
GO:0006805	xenobiotic metabolic process	9/290	90/12683	0.000210711	0.0240761	0.0236556	57491/1553/54659/1572/1548/1549/4025/54579/54578	9
GO:0045104	intermediate filament cytoskeleton organization	6/290	42/12683	0.000356081	0.0374313	0.0367776	3850/3849/112802/286887/121391/54474	6
GO:0045103	intermediate filament-based process	6/290	43/12683	0.000405983	0.0410356	0.0403189	3850/3849/112802/286887/121391/54474	6
GO:0002385	mucosal immune response	4/290	17/12683	0.000503611	0.0472675	0.046442	92747/1670/51297/282616	4
GO:0019724	B cell mediated immunity	8/290	82/12683	0.000558369	0.0489131	0.0480589	100423062/3135/4049/7124/970/930/2208/1235	8
FETAL-BIASED Regions – Promoter Accessibility GENES – GO BP Enrichments:
ID	Description	GeneRatio	BgRatio	pvalue	p.adjust	qvalue	geneID	Count
GO:0048762	mesenchymal cell differentiation	52/1669	201/14662	7.66084e-09	3.42151e-05	2.96371e-05	3280/9839/8828/3091/27250/2260/182/1906/7042/9464/5728/223117/25805/11171/596/80139/90/8091/3037/7043/2487/1909/10252/157506/2335/7048/130497/6934/4040/1601/2263/57556/650/6772/23122/8092/8829/3670/23603/23462/4192/23493/8929/6910/202151/7474/55273/3082/3569/10505/4254/23332	52
GO:0060537	muscle tissue development	77/1669	355/14662	1.37379e-08	3.42151e-05	2.96371e-05	2627/8470/8736/7168/79810/2260/1906/7042/2697/5728/3488/5925/25976/3720/596/10611/1063/1901/56999/857/90/1281/5156/9472/27063/9734/4211/115701/6926/7048/1525/130497/2702/93986/858/3156/4223/64208/2263/1948/6495/650/1634/3192/4729/5629/3398/2353/88/10891/3670/148/3688/10818/5292/26011/5350/56203/7422/23493/5457/3344/5914/80206/8929/6910/51804/7474/5530/8819/8048/22989/905/64091/5999/983/7273	77
GO:0060411	cardiac septum morphogenesis	26/1669	70/14662	1.80174e-08	3.42151e-05	2.96371e-05	2627/3280/8321/8828/10370/182/7042/55742/4091/90/6659/6926/7048/2702/2263/5629/3398/8829/3670/23462/6586/23493/5914/6910/9249/7474	26
GO:0035051	cardiocyte differentiation	39/1669	136/14662	2.83497e-08	3.9141e-05	3.39039e-05	2627/8470/3280/8736/27250/182/1906/7042/9464/10611/144165/90/5156/9472/10252/115701/6926/1525/302/7412/1948/650/3192/5629/88/3670/148/3688/10818/26011/7422/23493/5914/80206/6910/8048/5999/983/7273	39
GO:0001525	angiogenesis	89/1669	441/14662	3.92976e-08	3.9141e-05	3.39039e-05	3725/2627/3202/3200/8828/7057/7098/3091/2260/182/1906/7042/168667/2246/9464/5728/5747/55742/1282/1284/8325/1901/2113/56999/857/90627/90/2549/8091/81575/5156/10163/8817/161742/51421/1909/144455/9734/4211/2049/2335/7048/2152/2028/2702/302/3953/92140/10769/255324/4223/23576/23328/284/5168/2263/1948/57556/6667/79602/79733/6772/1634/7852/9270/8829/3670/3688/23462/4192/3696/7422/7424/5797/55294/7474/55…	89
GO:0048738	cardiac muscle tissue development	50/1669	199/14662	4.12228e-08	3.9141e-05	3.39039e-05	2627/8470/8736/7168/79810/2260/1906/7042/2697/5728/3720/10611/1901/56999/90/5156/9472/27063/4211/115701/6926/7048/1525/2702/2263/1948/650/3192/4729/5629/3398/88/3670/148/3688/10818/5292/26011/5350/7422/23493/5457/5914/80206/6910/7474/8048/5999/983/7273	50
GO:0010632	regulation of epithelial cell migration	50/1669	200/14662	4.89971e-08	3.98766e-05	3.45411e-05	3725/8828/7057/3091/2260/1906/7042/9448/168667/2246/4163/5728/5747/5793/11171/5581/2113/56999/90627/3037/8817/161742/6781/3146/9734/411/7114/7048/10769/4223/23328/284/27086/5168/6667/23122/1634/5629/9270/8829/23603/7422/7424/3673/5797/55294/7474/5764/23332/301	50
GO:0001655	urogenital system development	66/1669	307/14662	2.09985e-07	0.000108753	9.42017e-05	9510/3280/84159/79810/2260/182/7042/55366/168667/2246/10116/1027/5728/25976/1282/596/4774/1063/4091/9788/3371/55083/5156/3037/6659/79633/2049/10252/157506/80184/130497/2028/10972/9863/284/80144/2263/1948/6495/23279/650/3248/6772/1634/5629/3398/10409/2200/8829/4090/10818/54806/317/7422/5727/2043/5914/51804/7021/7474/5800/6492/947/301/9096/255743	66
GO:0001667	ameboidal-type cell migration	73/1669	358/14662	4.33543e-07	0.000176421	0.000152816	3725/9839/8828/84159/7057/3091/2260/1906/7042/9448/168667/2246/4163/9464/5728/5747/223117/5793/11171/5581/2113/56999/23189/90627/90/9590/10163/3037/8817/161742/51421/6781/3146/9734/411/2335/7114/7048/2768/10769/397/4223/23328/284/27086/5168/1948/57556/6667/23122/9530/1634/5629/9270/8092/2241/8829/3670/3688/23603/7422/7424/3673/5797/8929/55294/7474/5764/7857/10505/4254/23332/301	73
GO:0031589	cell-substrate adhesion	66/1669	319/14662	9.00766e-07	0.000294336	0.000254954	604/10580/84034/7057/182/9448/5728/948/5747/55742/5581/596/4091/56999/3694/23189/3987/1281/8322/22795/151887/84168/3037/5295/9748/56672/2049/79834/2335/3672/7412/5861/8910/284/5921/23122/10979/81792/9270/7414/88/2241/8829/1842/1021/3688/3915/23603/4192/3918/10395/7422/3673/10631/5764/25890/6093/5800/947/23332/84962/255743/55435/158326/10085/395	66
GO:0090132	epithelium migration	56/1669	258/14662	1.25423e-06	0.00037607	0.000325752	3725/9839/8828/7057/3091/2260/1906/7042/9448/168667/2246/4163/5728/5747/79977/5793/11171/5581/2113/56999/23189/90627/3037/8817/161742/6781/3146/9734/411/7114/7048/10769/4223/23328/284/27086/5168/1948/6667/23122/1634/5629/9270/8829/3688/23603/7422/7424/3673/5797/55294/7474/5764/7857/23332/301	56
GO:0033002	muscle cell proliferation	41/1669	173/14662	3.35354e-06	0.000683115	0.000591714	9510/3725/2627/7057/7168/27250/2260/1906/7042/2697/1027/5728/3488/3720/6502/1901/4331/3486/7043/4211/5592/7048/10135/3156/6934/284/27086/2263/6495/3248/6772/3398/10891/5292/26011/3673/23493/6910/60560/3569/983	41
GO:0000082	G1/S transition of mitotic cell cycle	49/1669	223/14662	3.9658e-06	0.000779074	0.000674833	9510/51065/1027/5728/23236/5925/6502/596/7325/4331/90/8453/6659/54107/7298/144455/4848/8738/58480/29883/10769/571/79733/55904/4172/3398/7465/246175/1021/3688/4174/11319/9134/586/902/3624/4999/10106/7029/4175/5962/81853/5530/5001/6119/8317/301/27085/983	49
GO:0044843	cell cycle G1/S phase transition	51/1669	237/14662	4.79321e-06	0.00091023	0.000788441	9510/51065/1027/5728/23236/5925/6502/596/7325/4331/90/8453/6659/54107/7298/144455/4848/8738/493/58480/29883/10769/571/79733/55904/4172/3398/7465/246175/1021/3688/4174/11319/9134/586/902/3624/4999/55294/10106/7029/4175/5962/81853/5530/5001/6119/8317/301/27085/983	51
GO:0071559	response to transforming growth factor beta	50/1669	231/14662	4.97868e-06	0.000914953	0.000792532	677/3725/4052/7057/2534/10370/1906/7042/5747/65997/1278/25805/1284/11171/4091/80139/857/3987/90/5139/1281/9315/7043/27063/658/7048/9076/858/135228/79674/23089/1601/2263/3248/50515/10979/6660/2353/2200/10891/4090/463/317/7525/6498/10631/6770/7474/6093/255743	50
GO:0050673	epithelial cell proliferation	67/1669	345/14662	7.37493e-06	0.00122645	0.00106235	677/3725/3202/3280/8828/7057/3091/2260/2267/7042/55366/168667/2697/2246/4163/1027/5728/3488/5925/4781/11171/9788/80139/857/3486/675/3037/3146/130497/2152/6657/93986/858/135228/255324/6934/3664/5828/2263/1948/6667/599/6495/650/6772/5629/9270/3398/8829/3670/1021/10818/3915/4192/1749/7422/7424/5727/5797/55294/51804/7474/5764/3082/1750/7857/947	67
GO:0007044	cell-substrate junction assembly	26/1669	92/14662	7.53481e-06	0.00122645	0.00106235	10580/7057/9448/5728/5747/596/3987/9748/79834/2335/23122/10979/9270/88/8829/3915/23603/3918/10395/7422/3673/667/6093/23332/84962/395	26
GO:0150115	cell-substrate junction organization	26/1669	92/14662	7.53481e-06	0.00122645	0.00106235	10580/7057/9448/5728/5747/596/3987/9748/79834/2335/23122/10979/9270/88/8829/3915/23603/3918/10395/7422/3673/667/6093/23332/84962/395	26
GO:0060562	epithelial tube morphogenesis	61/1669	306/14662	8.04583e-06	0.00124895	0.00108184	3202/3280/8321/9839/57619/3091/1906/7042/55366/2697/2246/9464/7976/8195/79977/1282/596/8543/144165/9788/90627/90/3371/55083/25902/6659/1909/79633/10252/157506/80184/6926/7048/130497/57534/4040/27086/2263/1948/6495/650/81792/9355/7852/5629/340419/8092/8829/4192/54806/317/10395/7422/5727/2043/5914/51804/7474/4522/10253/255743	61
GO:0071560	cellular response to transforming growth factor beta stimulus	48/1669	226/14662	1.3047e-05	0.00181289	0.00157033	677/3725/4052/7057/2534/10370/1906/7042/5747/65997/1278/25805/1284/11171/4091/80139/857/3987/90/5139/1281/9315/7043/27063/658/7048/9076/858/135228/79674/23089/1601/2263/3248/50515/10979/6660/2353/2200/10891/4090/317/7525/6498/10631/6770/7474/255743	48
FETAL-BIASED Regions – Promoter Intersection GENES – GO BP Enrichments:
ID	Description	GeneRatio	BgRatio	pvalue	p.adjust	qvalue	geneID	Count
GO:0001501	skeletal system development	117/1995	401/12683	3.59438e-12	1.99632e-08	1.7393e-08	2131/3202/3203/55636/3199/3198/84159/3218/3091/3215/1906/7042/2697/1290/9464/3216/3213/3204/3209/1112/3235/3217/5479/4147/285590/3212/25976/1278/3219/8195/79977/55790/3201/5396/1281/3238/4088/1462/8091/5156/25902/10163/3037/2114/3236/1009/202018/8817/2487/7298/6781/79633/3231/157506/6670/6926/3207/658/960/8575/7048/64764/130497/2702/302/10743/10234/2202/4982/4256/3239/4040/27086/6495/650/3623/505…	117
GO:0007507	heart development	126/1995	454/12683	2.28354e-11	6.3414e-08	5.52497e-08	9510/3725/8470/3280/8321/4052/55636/8736/8828/3091/7168/79810/27250/10370/182/1906/7042/2697/9464/1027/9782/5728/133/5747/5925/285590/3720/8195/55742/79977/157378/57142/10611/1901/8543/27295/56999/4331/144165/90/5019/11174/80114/1281/4088/5156/9645/4205/3037/23767/6909/161742/1909/9472/27063/8737/282996/79633/9734/115701/57178/6926/1848/7048/1525/130497/2702/302/7412/57534/4040/64208/1948/6495/79…	126
GO:0048514	blood vessel morphogenesis	116/1995	433/12683	1.48779e-09	2.75439e-06	2.39978e-06	3725/3202/3280/55636/8828/3198/7057/7098/9444/3091/182/1906/7042/168667/2697/2246/9464/5728/3213/133/3204/5747/7716/25976/55742/1282/1284/8325/5578/1901/2113/56999/857/90627/90/5396/1281/8322/2549/8091/81575/5156/51666/7855/10163/3037/8817/79400/6909/161742/1909/144455/9734/57178/2335/7048/2152/2028/2702/302/3953/92140/10769/4223/23576/23328/284/5168/1948/57556/7128/6667/6495/79602/1306/3248/7973…	116
GO:0061061	muscle structure development	128/1995	496/12683	2.68887e-09	3.73349e-06	3.25282e-06	8470/3280/8321/55636/8736/7345/84159/9444/7168/79810/27250/182/1906/7042/79365/2697/5728/3488/23236/133/5925/3235/3720/596/10611/1063/1901/27295/144165/857/90/91653/1281/4088/3486/5156/4205/93166/7832/85461/3236/6909/9472/27063/8737/9734/2317/8763/389072/115701/6926/9325/1106/7048/1525/1465/6840/93986/858/3156/4223/6934/1495/8910/64208/348093/1948/5738/6495/650/23363/5159/2273/3192/5629/2353/1040…	128
GO:0031589	cell-substrate adhesion	78/1995	260/12683	3.83474e-09	4.25963e-06	3.71122e-06	604/10580/84034/7057/22998/182/9448/5728/948/3204/5747/55742/6239/5581/90102/59339/596/56999/3694/23189/3987/1281/4088/8322/22795/151887/84168/3037/9806/5295/9748/59277/56672/79834/2335/960/3672/7412/10391/5861/8910/284/5921/23122/10979/81792/55612/9270/88/2241/8829/1842/3688/22801/3915/23603/4192/3918/7422/8324/3673/10631/129080/3791/5795/3175/5764/25890/6093/5800/23332/84962/255743/55435/158326…	78
GO:0060537	muscle tissue development	87/1995	308/12683	1.22585e-08	1.13473e-05	9.88637e-06	8470/55636/8736/7168/79810/1906/7042/2697/5728/3488/5925/3235/25976/3720/596/10611/1063/1901/56999/857/90/1281/4088/5156/4205/7832/3236/6909/9472/27063/8737/9734/2317/115701/6926/7048/1525/1465/130497/2702/6840/93986/858/3156/4223/64208/1948/6495/650/23363/5159/3192/4729/5629/3398/2353/88/10891/3670/148/3688/5292/56203/7422/6474/8324/23493/5457/3344/5914/80206/8929/6910/1134/4036/7474/5530/7528/5…	87
GO:0010632	regulation of epithelial cell migration	57/1995	176/12683	2.53892e-08	1.89968e-05	1.65511e-05	3725/10982/8828/7057/3091/1906/7042/9448/168667/2246/4163/5728/5747/5793/6239/11171/5581/57142/5578/2113/56999/90627/3037/8817/161742/6781/3146/9734/7114/7048/10769/4223/23328/284/27086/5168/6667/5801/23122/949/5629/9270/8829/23603/3162/7422/7424/3673/28984/3791/5797/55294/1839/7474/5764/23332/301	57
GO:0002009	morphogenesis of an epithelium	113/1995	439/12683	2.73631e-08	1.89968e-05	1.65511e-05	4919/3202/3280/8321/9839/57619/23002/3091/182/1906/7042/55366/2697/2246/10116/9464/5728/3488/133/166336/3217/7976/3212/8195/79977/1282/6239/90102/4300/84133/596/8543/144165/9788/90627/90/3371/4088/8322/55083/9645/25902/7855/23767/6909/2487/1909/79633/59277/157506/80184/6926/3207/960/7048/130497/1175/1213/3237/9863/57534/3239/5693/4040/9861/80144/27086/1601/1948/6495/650/6772/23122/81792/9355/7852…	113
GO:0010810	regulation of cell-substrate adhesion	51/1995	161/12683	2.97428e-07	0.000123092	0.000107245	604/84034/7057/22998/182/9448/5728/948/3204/5747/6239/5581/90102/59339/596/23189/3987/4088/8322/151887/3037/9806/5295/9748/79834/2335/10391/5921/23122/55612/9270/8829/1842/23603/4192/7422/8324/10631/129080/3791/5795/3175/5764/25890/6093/5800/23332/255743/55435/10085/395	51
GO:0007015	actin filament organization	80/1995	295/12683	3.1028e-07	0.000123092	0.000107245	4082/84952/10580/8470/8736/57619/7168/22998/120/830/285590/8195/203228/2059/5581/90102/596/1901/57471/27295/23189/9873/93663/4088/10602/6624/9645/10163/55740/4430/1902/5295/961/1809/7114/10092/7430/9886/10391/5074/51474/2764/23363/5921/23122/171024/9530/5629/9270/832/116985/88/2241/8829/7111/23603/56203/163782/6711/80206/28984/10278/57553/5756/5987/23075/5962/643338/51429/50507/23242/6093/23433/2…	80
GO:0071559	response to transforming growth factor beta	59/1995	199/12683	4.6555e-07	0.000150582	0.000131196	3725/4052/7057/2534/10370/203100/1906/7042/5747/65997/1278/25805/1284/11171/80139/857/3987/90/5139/1281/4088/27063/658/7048/9076/858/135228/79674/678/753/23089/1601/130399/3248/27122/7044/50515/10979/6660/55612/2353/2200/10891/4090/463/317/7525/6498/10631/64750/6770/2908/10637/7474/3175/50507/6093/124857/255743	59
GO:0007044	cell-substrate junction assembly	31/1995	80/12683	5.15136e-07	0.000150582	0.000131196	10580/7057/22998/9448/5728/5747/90102/596/3987/4088/9748/79834/2335/10391/23122/10979/9270/88/8829/3915/23603/3918/7422/3673/667/3791/5795/6093/23332/84962/395	31
GO:0150115	cell-substrate junction organization	31/1995	80/12683	5.15136e-07	0.000150582	0.000131196	10580/7057/22998/9448/5728/5747/90102/596/3987/4088/9748/79834/2335/10391/23122/10979/9270/88/8829/3915/23603/3918/7422/3673/667/3791/5795/6093/23332/84962/395	31
GO:0048762	mesenchymal cell differentiation	53/1995	173/12683	5.73969e-07	0.000151801	0.000132257	3280/9839/8828/3091/27250/182/1906/7042/9464/5728/25805/11171/90102/57142/596/80139/90/4088/8091/3037/202018/2487/1909/157506/2335/7048/130497/6934/4040/753/1601/57556/650/6772/23122/8092/8829/3670/23603/23462/4192/23493/28984/8929/6910/202151/7474/55273/3082/6615/3569/4254/23332	53
GO:0048704	embryonic skeletal system morphogenesis	30/1995	77/12683	6.8328e-07	0.000172497	0.000150289	3202/3203/3199/3198/3218/3215/3216/3213/3204/3235/3217/3212/79977/3201/5396/4088/5156/25902/3236/157506/3207/7048/130497/6495/50515/8092/6474/7703/4522/6913	30
GO:0090132	epithelium migration	64/1995	225/12683	7.86396e-07	0.000181985	0.000158555	3725/9839/10982/8828/7057/3091/1906/7042/9448/168667/2246/4163/5728/5747/79977/5793/6239/11171/5581/57142/5578/2113/56999/23189/90627/3037/8817/161742/6781/3146/9734/7114/7048/10769/4223/23328/284/27086/5168/1948/6667/5801/23122/949/5629/55612/9270/8829/3688/23603/3162/7422/7424/3673/28984/3791/5797/55294/1839/7474/5764/7857/23332/301	64
GO:0071560	cellular response to transforming growth factor beta stimulus	57/1995	194/12683	1.00214e-06	0.000210884	0.000183733	3725/4052/7057/2534/10370/203100/1906/7042/5747/65997/1278/25805/1284/11171/80139/857/3987/90/5139/1281/4088/27063/658/7048/9076/858/135228/79674/678/753/23089/1601/130399/3248/27122/7044/50515/10979/6660/55612/2353/2200/10891/4090/317/7525/6498/10631/64750/6770/2908/10637/7474/3175/50507/124857/255743	57
GO:0001667	ameboidal-type cell migration	80/1995	305/12683	1.33507e-06	0.00025569	0.000222771	3725/9839/10982/8828/84159/7057/3091/1906/7042/9448/168667/2246/4163/9464/5728/5747/5793/6239/11171/5581/57142/5578/2113/56999/23189/90627/90/9590/10163/3037/8817/161742/6781/3146/9734/2335/7114/7048/2768/10769/397/4223/23328/284/27086/5168/1948/57556/6667/130399/5801/23122/9530/949/5629/55612/9270/8092/2241/8829/3670/3688/23603/3162/7422/7424/3673/28984/3791/64750/5797/8929/55294/1839/7474/5764/…	80
GO:0033002	muscle cell proliferation	47/1995	152/12683	1.84424e-06	0.000330416	0.000287877	9510/3725/7057/7168/27250/1906/7042/2697/1027/3592/5728/3488/3720/6502/1901/4331/3486/5031/4835/6909/8737/5592/7048/10135/3156/6934/284/27086/348093/7128/6495/3248/5159/6772/3398/10891/5292/3162/3673/23493/6910/1839/4217/60560/3569/983/2081	47
GO:0110053	regulation of actin filament organization	56/1995	193/12683	1.92139e-06	0.000333482	0.000290548	7168/22998/120/830/285590/8195/203228/2059/5581/90102/1901/23189/9873/93663/4088/10602/10163/1902/5295/961/7114/10092/9886/10391/51474/2764/5921/23122/171024/9530/9270/832/116985/88/2241/8829/7111/56203/163782/6711/80206/28984/5756/5987/23075/5962/643338/51429/50507/6093/23332/5999/55435/55607/395/2934	56

## Sheet: Developmental RNA-seq METADATA
METADATA
File.accession	File.format	File.assembly	Assay	Lab	Biosample.term.name	Output.type	Experiment.accession	type	simplified
ENCFF739OIE	tsv	GRCh38	polyA plus RNA-seq	ENCODE Processing Pipeline	adrenal gland	gene quantifications	ENCSR146ZKR	adult	adrenal gland
ENCFF866LBS	tsv	GRCh38	polyA plus RNA-seq	ENCODE Processing Pipeline	adrenal gland	gene quantifications	ENCSR680AAZ	adult	adrenal gland
ENCFF802ADF	tsv	GRCh38	polyA plus RNA-seq	ENCODE Processing Pipeline	adrenal gland	gene quantifications	ENCSR598KJX	adult	adrenal gland
ENCFF908UKE	tsv	GRCh38	polyA plus RNA-seq	ENCODE Processing Pipeline	adrenal gland	gene quantifications	ENCSR555BCP	embryo	adrenal gland
ENCFF555RGZ	tsv	GRCh38	polyA plus RNA-seq	ENCODE Processing Pipeline	adrenal gland	gene quantifications	ENCSR688YOZ	embryo	adrenal gland
ENCFF217TKV	tsv	GRCh38	polyA plus RNA-seq	ENCODE Processing Pipeline	adrenal gland	gene quantifications	ENCSR740OPV	embryo	adrenal gland
ENCFF467PRR	tsv	GRCh38	polyA plus RNA-seq	ENCODE Processing Pipeline	adrenal gland	gene quantifications	ENCSR120NEA	embryo	adrenal gland
ENCFF918DYI	tsv	GRCh38	polyA plus RNA-seq	ENCODE Processing Pipeline	adrenal gland	gene quantifications	ENCSR335GET	embryo	adrenal gland
ENCFF784ZTQ	tsv	GRCh38	polyA plus RNA-seq	ENCODE Processing Pipeline	brain	gene quantifications	ENCSR274JRR	adult	brain
ENCFF323NAG	tsv	GRCh38	polyA plus RNA-seq	ENCODE Processing Pipeline	layer of hippocampus	gene quantifications	ENCSR239GFM	adult	brain
ENCFF951YSP	tsv	GRCh38	polyA plus RNA-seq	ENCODE Processing Pipeline	germinal matrix	gene quantifications	ENCSR969JYY	embryo	brain
ENCFF777IQQ	tsv	GRCh38	polyA plus RNA-seq	ENCODE Processing Pipeline	cerebellum	gene quantifications	ENCSR470JHE	embryo	brain
ENCFF823DWN	tsv	GRCh38	polyA plus RNA-seq	ENCODE Processing Pipeline	heart right ventricle	gene quantifications	ENCSR433XCV	adult	heart
ENCFF860DPP	tsv	GRCh38	polyA plus RNA-seq	ENCODE Processing Pipeline	heart left ventricle	gene quantifications	ENCSR769LNJ	adult	heart
ENCFF635SOC	tsv	GRCh38	polyA plus RNA-seq	ENCODE Processing Pipeline	right cardiac atrium	gene quantifications	ENCSR675YAS	adult	heart
ENCFF227RBV	tsv	GRCh38	polyA plus RNA-seq	ENCODE Processing Pipeline	heart	gene quantifications	ENCSR635GTY	adult	heart
ENCFF496OSH	tsv	GRCh38	polyA plus RNA-seq	ENCODE Processing Pipeline	heart	gene quantifications	ENCSR047LLJ	embryo	heart
ENCFF089NNQ	tsv	GRCh38	polyA plus RNA-seq	ENCODE Processing Pipeline	heart	gene quantifications	ENCSR863BUL	embryo	heart
ENCFF051UVH	tsv	GRCh38	polyA plus RNA-seq	ENCODE Processing Pipeline	lung	gene quantifications	ENCSR129KCJ	adult	lung
ENCFF947WLV	tsv	GRCh38	polyA plus RNA-seq	ENCODE Processing Pipeline	lung	gene quantifications	ENCSR917YHC	adult	lung
ENCFF391BNP	tsv	GRCh38	polyA plus RNA-seq	ENCODE Processing Pipeline	left lung	gene quantifications	ENCSR572FXC	embryo	lung
ENCFF035KGA	tsv	GRCh38	polyA plus RNA-seq	ENCODE Processing Pipeline	right lung	gene quantifications	ENCSR176WMG	embryo	lung
ENCFF643UJO	tsv	GRCh38	polyA plus RNA-seq	ENCODE Processing Pipeline	left lung	gene quantifications	ENCSR592EZK	embryo	lung
ENCFF406OKZ	tsv	GRCh38	polyA plus RNA-seq	ENCODE Processing Pipeline	left lung	gene quantifications	ENCSR733MWN	embryo	lung
ENCFF015DMG	tsv	GRCh38	polyA plus RNA-seq	ENCODE Processing Pipeline	right lung	gene quantifications	ENCSR560MDQ	embryo	lung
ENCFF535JUK	tsv	GRCh38	polyA plus RNA-seq	ENCODE Processing Pipeline	right lung	gene quantifications	ENCSR074APH	embryo	lung
ENCFF066QDJ	tsv	GRCh38	polyA plus RNA-seq	ENCODE Processing Pipeline	left lung	gene quantifications	ENCSR499NEL	embryo	lung
ENCFF487DRK	tsv	GRCh38	polyA plus RNA-seq	ENCODE Processing Pipeline	right lung	gene quantifications	ENCSR044JAQ	embryo	lung
ENCFF934RBH	tsv	GRCh38	polyA plus RNA-seq	ENCODE Processing Pipeline	left lung	gene quantifications	ENCSR222IGR	embryo	lung
ENCFF919EYT	tsv	GRCh38	polyA plus RNA-seq	ENCODE Processing Pipeline	left lung	gene quantifications	ENCSR861SOG	embryo	lung
ENCFF083YGV	tsv	GRCh38	polyA plus RNA-seq	ENCODE Processing Pipeline	right lung	gene quantifications	ENCSR554KBK	embryo	lung
ENCFF489IIG	tsv	GRCh38	polyA plus RNA-seq	ENCODE Processing Pipeline	psoas muscle	gene quantifications	ENCSR843HXR	adult	muscle
ENCFF543WCB	tsv	GRCh38	polyA plus RNA-seq	ENCODE Processing Pipeline	psoas muscle	gene quantifications	ENCSR502OTI	adult	muscle
ENCFF038FYS	tsv	GRCh38	polyA plus RNA-seq	ENCODE Processing Pipeline	muscle of arm	gene quantifications	ENCSR547TNE	embryo	muscle
ENCFF382FLL	tsv	GRCh38	polyA plus RNA-seq	ENCODE Processing Pipeline	muscle of back	gene quantifications	ENCSR094RGI	embryo	muscle
ENCFF622TLD	tsv	GRCh38	polyA plus RNA-seq	ENCODE Processing Pipeline	muscle of leg	gene quantifications	ENCSR545WAC	embryo	muscle
ENCFF647PIL	tsv	GRCh38	polyA plus RNA-seq	ENCODE Processing Pipeline	muscle of arm	gene quantifications	ENCSR332MTG	embryo	muscle
ENCFF927KFT	tsv	GRCh38	polyA plus RNA-seq	ENCODE Processing Pipeline	forelimb muscle	gene quantifications	ENCSR711NGL	embryo	muscle
ENCFF114CDE	tsv	GRCh38	polyA plus RNA-seq	ENCODE Processing Pipeline	muscle of leg	gene quantifications	ENCSR561WEX	embryo	muscle
ENCFF073LSZ	tsv	GRCh38	polyA plus RNA-seq	ENCODE Processing Pipeline	muscle of trunk	gene quantifications	ENCSR906HEV	embryo	muscle
ENCFF860PYR	tsv	GRCh38	polyA plus RNA-seq	ENCODE Processing Pipeline	muscle of back	gene quantifications	ENCSR522XTV	embryo	muscle
ENCFF316SOJ	tsv	GRCh38	polyA plus RNA-seq	ENCODE Processing Pipeline	muscle of leg	gene quantifications	ENCSR699YJR	embryo	muscle
ENCFF393OUO	tsv	GRCh38	polyA plus RNA-seq	ENCODE Processing Pipeline	muscle of leg	gene quantifications	ENCSR174ESD	embryo	muscle
ENCFF603FIV	tsv	GRCh38	polyA plus RNA-seq	ENCODE Processing Pipeline	muscle of arm	gene quantifications	ENCSR785OCX	embryo	muscle
ENCFF398PFM	tsv	GRCh38	polyA plus RNA-seq	ENCODE Processing Pipeline	muscle of leg	gene quantifications	ENCSR447IJE	embryo	muscle
ENCFF115ORA	tsv	GRCh38	polyA plus RNA-seq	ENCODE Processing Pipeline	muscle of back	gene quantifications	ENCSR891JVD	embryo	muscle
ENCFF726VKQ	tsv	GRCh38	polyA plus RNA-seq	ENCODE Processing Pipeline	muscle of arm	gene quantifications	ENCSR317LMH	embryo	muscle
ENCFF282SUS	tsv	GRCh38	polyA plus RNA-seq	ENCODE Processing Pipeline	muscle of back	gene quantifications	ENCSR239BBI	embryo	muscle
ENCFF404ZXJ	tsv	GRCh38	polyA plus RNA-seq	ENCODE Processing Pipeline	muscle of arm	gene quantifications	ENCSR575OHC	embryo	muscle
ENCFF993LHQ	tsv	GRCh38	polyA plus RNA-seq	ENCODE Processing Pipeline	muscle of arm	gene quantifications	ENCSR990LHE	embryo	muscle
ENCFF195KMJ	tsv	GRCh38	polyA plus RNA-seq	ENCODE Processing Pipeline	muscle of back	gene quantifications	ENCSR806ESH	embryo	muscle
ENCFF350ZWB	tsv	GRCh38	polyA plus RNA-seq	ENCODE Processing Pipeline	muscle of arm	gene quantifications	ENCSR364IBB	embryo	muscle
ENCFF185TFE	tsv	GRCh38	polyA plus RNA-seq	ENCODE Processing Pipeline	muscle of back	gene quantifications	ENCSR576UKA	embryo	muscle
ENCFF313PHN	tsv	GRCh38	polyA plus RNA-seq	ENCODE Processing Pipeline	muscle of back	gene quantifications	ENCSR729ZII	embryo	muscle
ENCFF272NAO	tsv	GRCh38	polyA plus RNA-seq	ENCODE Processing Pipeline	muscle of arm	gene quantifications	ENCSR305NXN	embryo	muscle
ENCFF706VUD	tsv	GRCh38	polyA plus RNA-seq	ENCODE Processing Pipeline	muscle of back	gene quantifications	ENCSR652AWW	embryo	muscle
ENCFF513PLX	tsv	GRCh38	polyA plus RNA-seq	ENCODE Processing Pipeline	muscle of arm	gene quantifications	ENCSR406YML	embryo	muscle
ENCFF424LYQ	tsv	GRCh38	polyA plus RNA-seq	ENCODE Processing Pipeline	muscle of back	gene quantifications	ENCSR995ORR	embryo	muscle
ENCFF690YGY	tsv	GRCh38	polyA plus RNA-seq	ENCODE Processing Pipeline	muscle of arm	gene quantifications	ENCSR620ZNQ	embryo	muscle
ENCFF905BGI	tsv	GRCh38	polyA plus RNA-seq	ENCODE Processing Pipeline	muscle of arm	gene quantifications	ENCSR423LLK	embryo	muscle
ENCFF884IWB	tsv	GRCh38	polyA plus RNA-seq	ENCODE Processing Pipeline	muscle of leg	gene quantifications	ENCSR086DZF	embryo	muscle
ENCFF680ZPA	tsv	GRCh38	polyA plus RNA-seq	ENCODE Processing Pipeline	hindlimb muscle	gene quantifications	ENCSR516VDS	embryo	muscle
ENCFF302HTI	tsv	GRCh38	polyA plus RNA-seq	ENCODE Processing Pipeline	muscle of back	gene quantifications	ENCSR027EJD	embryo	muscle
ENCFF007LRI	tsv	GRCh38	polyA plus RNA-seq	ENCODE Processing Pipeline	muscle of arm	gene quantifications	ENCSR677MYO	embryo	muscle
ENCFF068NMI	tsv	GRCh38	polyA plus RNA-seq	ENCODE Processing Pipeline	muscle of leg	gene quantifications	ENCSR096USV	embryo	muscle
ENCFF419PGC	tsv	GRCh38	polyA plus RNA-seq	ENCODE Processing Pipeline	muscle of trunk	gene quantifications	ENCSR531RKI	embryo	muscle
ENCFF559DXJ	tsv	GRCh38	polyA plus RNA-seq	ENCODE Processing Pipeline	muscle of leg	gene quantifications	ENCSR144UVO	embryo	muscle
ENCFF125HHE	tsv	GRCh38	polyA plus RNA-seq	ENCODE Processing Pipeline	muscle of leg	gene quantifications	ENCSR860DST	embryo	muscle
ENCFF545TFV	tsv	GRCh38	polyA plus RNA-seq	ENCODE Processing Pipeline	spleen	gene quantifications	ENCSR910QOX	adult	spleen
ENCFF809RAX	tsv	GRCh38	polyA plus RNA-seq	ENCODE Processing Pipeline	spleen	gene quantifications	ENCSR448VSW	adult	spleen
ENCFF597SJD	tsv	GRCh38	polyA plus RNA-seq	ENCODE Processing Pipeline	spleen	gene quantifications	ENCSR510PSL	adult	spleen
ENCFF921BKL	tsv	GRCh38	polyA plus RNA-seq	ENCODE Processing Pipeline	spleen	gene quantifications	ENCSR700QVJ	embryo	spleen
ENCFF693OQP	tsv	GRCh38	polyA plus RNA-seq	ENCODE Processing Pipeline	spleen	gene quantifications	ENCSR265NZF	embryo	spleen
ENCFF850QFV	tsv	GRCh38	polyA plus RNA-seq	ENCODE Processing Pipeline	stomach	gene quantifications	ENCSR721HDG	adult	stomach
ENCFF082DAH	tsv	GRCh38	polyA plus RNA-seq	ENCODE Processing Pipeline	stomach	gene quantifications	ENCSR980UEY	adult	stomach
ENCFF815DCS	tsv	GRCh38	polyA plus RNA-seq	ENCODE Processing Pipeline	stomach	gene quantifications	ENCSR571IUW	embryo	stomach
ENCFF031EAX	tsv	GRCh38	polyA plus RNA-seq	ENCODE Processing Pipeline	stomach	gene quantifications	ENCSR951NPS	embryo	stomach
ENCFF953SNL	tsv	GRCh38	polyA plus RNA-seq	ENCODE Processing Pipeline	stomach	gene quantifications	ENCSR123ZCX	embryo	stomach
ENCFF050VJS	tsv	GRCh38	polyA plus RNA-seq	ENCODE Processing Pipeline	stomach	gene quantifications	ENCSR774SEX	embryo	stomach
ENCFF648ZHB	tsv	GRCh38	polyA plus RNA-seq	ENCODE Processing Pipeline	stomach	gene quantifications	ENCSR783BUO	embryo	stomach
ENCFF874WKO	tsv	GRCh38	polyA plus RNA-seq	ENCODE Processing Pipeline	stomach	gene quantifications	ENCSR549DVY	embryo	stomach
ENCFF881ZXZ	tsv	GRCh38	polyA plus RNA-seq	ENCODE Processing Pipeline	stomach	gene quantifications	ENCSR702IGQ	embryo	stomach

## Sheet: Aging RNA-seq Data METADATA
METADATA
GTEX ACCESSION	age	tissue	SIMPLE	TISSUE_SIMPLIFIED
GTEX.111CU.0326.SM.5GZXO	55	Lung	OLD	Lung
GTEX.111CU.0926.SM.5EGIK	55	Stomach	OLD	Stomach
GTEX.111CU.2026.SM.5GZZC	55	Muscle - Skeletal	OLD	Muscle
GTEX.111FC.0326.SM.5GZZ1	65	Muscle - Skeletal	OLD	Muscle
GTEX.111FC.0826.SM.5GZWO	65	Heart - Left Ventricle	OLD	Heart
GTEX.111FC.1126.SM.5GZWU	65	Lung	OLD	Lung
GTEX.111FC.3326.SM.5GZYV	65	Brain - Cerebellum	OLD	Brain
GTEX.111VG.0726.SM.5GIDC	65	Lung	OLD	Lung
GTEX.111VG.2626.SM.5GZY2	65	Muscle - Skeletal	OLD	Muscle
GTEX.111YS.0426.SM.5987O	65	Heart - Left Ventricle	OLD	Heart
GTEX.111YS.0626.SM.5GZXV	65	Lung	OLD	Lung
GTEX.111YS.1126.SM.5GZYQ	65	Stomach	OLD	Stomach
GTEX.111YS.2326.SM.5987L	65	Muscle - Skeletal	OLD	Muscle
GTEX.117XS.2526.SM.5H11G	65	Muscle - Skeletal	OLD	Muscle
GTEX.117XS.3126.SM.5GIDP	65	Brain - Cerebellum	OLD	Brain
GTEX.117YW.0326.SM.5N9CY	55	Heart - Left Ventricle	OLD	Heart
GTEX.117YW.0526.SM.5H11C	55	Lung	OLD	Lung
GTEX.117YW.2226.SM.5N9DB	55	Stomach	OLD	Stomach
GTEX.117YW.2426.SM.5Q5AE	55	Muscle - Skeletal	OLD	Muscle
GTEX.117YX.1026.SM.5H11V	55	Stomach	OLD	Stomach
GTEX.117YX.1126.SM.5H128	55	Heart - Left Ventricle	OLD	Heart
GTEX.117YX.1326.SM.5H125	55	Lung	OLD	Lung
GTEX.117YX.2526.SM.5EQ4Q	55	Muscle - Skeletal	OLD	Muscle
GTEX.1192X.0426.SM.5GIEE	55	Muscle - Skeletal	OLD	Muscle
GTEX.1192X.3226.SM.5987D	55	Brain - Cerebellum	OLD	Brain
GTEX.11DXZ.0626.SM.5GU77	55	Heart - Left Ventricle	OLD	Heart
GTEX.11DXZ.0726.SM.5N9C4	55	Lung	OLD	Lung
GTEX.11DXZ.2426.SM.5N9DT	55	Muscle - Skeletal	OLD	Muscle
GTEX.11DYG.2926.SM.5H132	65	Brain - Cerebellum	OLD	Brain
GTEX.11DZ1.0426.SM.5H11A	55	Lung	OLD	Lung
GTEX.11DZ1.0926.SM.5EQ5R	55	Muscle - Skeletal	OLD	Muscle
GTEX.11DZ1.2926.SM.5A5KI	55	Brain - Cerebellum	OLD	Brain
GTEX.11EI6.0326.SM.5EQ6G	65	Muscle - Skeletal	OLD	Muscle
GTEX.11EI6.0826.SM.5985V	65	Lung	OLD	Lung
GTEX.11EI6.2426.SM.5PNVS	65	Stomach	OLD	Stomach
GTEX.11EI6.2926.SM.5985U	65	Brain - Cerebellum	OLD	Brain
GTEX.11EQ8.0526.SM.5N9BC	65	Muscle - Skeletal	OLD	Muscle
GTEX.11EQ9.0226.SM.5A5JX	35	Lung	YOUNG	Lung
GTEX.11EQ9.1226.SM.5987E	35	Stomach	YOUNG	Stomach
GTEX.11EQ9.2126.SM.5PNVW	35	Muscle - Skeletal	YOUNG	Muscle
GTEX.11GS4.0526.SM.5A5KQ	65	Heart - Left Ventricle	OLD	Heart
GTEX.11GS4.2526.SM.5A5KT	65	Muscle - Skeletal	OLD	Muscle
GTEX.11GSO.2526.SM.5PNVX	65	Muscle - Skeletal	OLD	Muscle
GTEX.11GSO.3026.SM.5Q5AL	65	Brain - Cerebellum	OLD	Brain
GTEX.11LCK.0426.SM.5A5M8	35	Lung	YOUNG	Lung
GTEX.11LCK.0926.SM.5A5KA	35	Heart - Left Ventricle	YOUNG	Heart
GTEX.11LCK.1226.SM.5Q5AM	35	Muscle - Skeletal	YOUNG	Muscle
GTEX.11NSD.0326.SM.5A5LS	25	Lung	YOUNG	Lung
GTEX.11NSD.1426.SM.5HL67	25	Stomach	YOUNG	Stomach
GTEX.11NSD.2026.SM.5HL5U	25	Muscle - Skeletal	YOUNG	Muscle
GTEX.11NUK.0226.SM.5A5L4	55	Muscle - Skeletal	OLD	Muscle
GTEX.11NUK.0826.SM.5HL4U	55	Lung	OLD	Lung
GTEX.11NUK.2426.SM.5BC4U	55	Stomach	OLD	Stomach
GTEX.11NUK.3026.SM.5986K	55	Brain - Cerebellum	OLD	Brain
GTEX.11NV4.0326.SM.5HL58	65	Muscle - Skeletal	OLD	Muscle
GTEX.11NV4.1126.SM.5HL6J	65	Lung	OLD	Lung
GTEX.11NV4.2226.SM.5BC4T	65	Brain - Cerebellum	OLD	Brain
GTEX.11O72.0326.SM.5986D	45	Muscle - Skeletal	YOUNG	Muscle
GTEX.11O72.1126.SM.5N9E2	45	Heart - Left Ventricle	YOUNG	Heart
GTEX.11O72.1326.SM.5BC5A	45	Lung	YOUNG	Lung
GTEX.11O72.2826.SM.5HL6W	45	Brain - Cerebellum	YOUNG	Brain
GTEX.11OF3.1126.SM.5986C	65	Lung	OLD	Lung
GTEX.11OF3.2526.SM.5P9JL	65	Muscle - Skeletal	OLD	Muscle
GTEX.11ONC.0126.SM.5PNW6	65	Heart - Left Ventricle	OLD	Heart
GTEX.11ONC.2426.SM.5GU7H	65	Muscle - Skeletal	OLD	Muscle
GTEX.11ONC.3026.SM.5985W	65	Brain - Cerebellum	OLD	Brain
GTEX.11P7K.0326.SM.59871	35	Lung	YOUNG	Lung
GTEX.11P7K.1726.SM.5GU6F	35	Stomach	YOUNG	Stomach
GTEX.11P7K.1926.SM.5GU6R	35	Muscle - Skeletal	YOUNG	Muscle
GTEX.11P82.0726.SM.5PNYL	25	Stomach	YOUNG	Stomach
GTEX.11P82.1826.SM.5PNYJ	25	Muscle - Skeletal	YOUNG	Muscle
GTEX.11PRG.0326.SM.5GU53	55	Muscle - Skeletal	OLD	Muscle
GTEX.11PRG.0926.SM.5EGI8	55	Lung	OLD	Lung
GTEX.11PRG.2826.SM.5BC54	55	Brain - Cerebellum	OLD	Brain
GTEX.11TT1.0726.SM.5GU5A	25	Stomach	YOUNG	Stomach
GTEX.11TT1.1326.SM.5PNYM	25	Heart - Left Ventricle	YOUNG	Heart
GTEX.11TT1.1626.SM.5EQL7	25	Lung	YOUNG	Lung
GTEX.11TT1.2326.SM.5GU6N	25	Muscle - Skeletal	YOUNG	Muscle
GTEX.11TUW.0526.SM.5LU9A	65	Lung	OLD	Lung
GTEX.11TUW.1026.SM.5GU7D	65	Heart - Left Ventricle	OLD	Heart
GTEX.11TUW.2526.SM.5EQKN	65	Muscle - Skeletal	OLD	Muscle
GTEX.11UD2.0326.SM.5EQLE	55	Muscle - Skeletal	OLD	Muscle
GTEX.11UD2.0726.SM.5EQ69	55	Lung	OLD	Lung
GTEX.11WQC.0626.SM.5EQMF	65	Lung	OLD	Lung
GTEX.11WQC.2626.SM.5CVLF	65	Muscle - Skeletal	OLD	Muscle
GTEX.11WQK.0726.SM.5GU71	55	Muscle - Skeletal	OLD	Muscle
GTEX.11WQK.1226.SM.5GU5Z	55	Lung	OLD	Lung
GTEX.11WQK.2626.SM.5EQ4K	55	Stomach	OLD	Stomach
GTEX.11ZU8.2326.SM.5EQMJ	65	Muscle - Skeletal	OLD	Muscle
GTEX.11ZUS.0126.SM.5EQM5	35	Lung	YOUNG	Lung
GTEX.11ZUS.0226.SM.5FQT8	35	Heart - Left Ventricle	YOUNG	Heart
GTEX.11ZUS.1426.SM.5FQSP	35	Muscle - Skeletal	YOUNG	Muscle
GTEX.11ZUS.2826.SM.5EQKW	35	Brain - Cerebellum	YOUNG	Brain
GTEX.12126.0526.SM.5PNW4	25	Muscle - Skeletal	YOUNG	Muscle
GTEX.12126.0926.SM.5FQTW	25	Brain - Cerebellum	YOUNG	Brain
GTEX.1212Z.0626.SM.5FQTB	65	Heart - Left Ventricle	OLD	Heart
GTEX.1212Z.1026.SM.5EGJ8	65	Lung	OLD	Lung
GTEX.1212Z.2626.SM.5YY8P	65	Muscle - Skeletal	OLD	Muscle
GTEX.12584.0526.SM.5FQTS	45	Muscle - Skeletal	YOUNG	Muscle
GTEX.12584.0926.SM.5FQTN	45	Heart - Left Ventricle	YOUNG	Heart
GTEX.12584.1426.SM.5EGJ9	45	Lung	YOUNG	Lung
GTEX.12696.1026.SM.5FQUV	65	Lung	OLD	Lung
GTEX.12696.1126.SM.5FQTI	65	Heart - Left Ventricle	OLD	Heart
GTEX.12696.1726.SM.5EQLH	65	Stomach	OLD	Stomach
GTEX.12696.2826.SM.5FQTY	65	Muscle - Skeletal	OLD	Muscle
GTEX.12C56.0526.SM.5FQST	25	Stomach	YOUNG	Stomach
GTEX.12C56.1926.SM.5FQUG	25	Muscle - Skeletal	YOUNG	Muscle
GTEX.12KS4.0726.SM.5FQSX	35	Lung	YOUNG	Lung
GTEX.12KS4.0826.SM.5BC5R	35	Muscle - Skeletal	YOUNG	Muscle
GTEX.12WSA.0726.SM.5FQU2	65	Muscle - Skeletal	OLD	Muscle
GTEX.12WSA.1026.SM.5EGHN	65	Lung	OLD	Lung
GTEX.12WSE.0826.SM.5S2VL	25	Lung	YOUNG	Lung
GTEX.12WSE.2926.SM.5RQJ9	25	Brain - Cerebellum	YOUNG	Brain
GTEX.12WSF.0926.SM.6PALU	75	Muscle - Skeletal	OLD	Muscle
GTEX.12WSH.0126.SM.5GCO3	55	Lung	OLD	Lung
GTEX.12WSH.2526.SM.5CVNH	55	Muscle - Skeletal	OLD	Muscle
GTEX.12WSH.3126.SM.5LZW8	55	Brain - Cerebellum	OLD	Brain
GTEX.12WSI.0826.SM.5EGKD	55	Lung	OLD	Lung
GTEX.12WSL.1026.SM.5CVNJ	55	Lung	OLD	Lung
GTEX.12WSL.2726.SM.5CVNL	55	Muscle - Skeletal	OLD	Muscle
GTEX.12WSM.0326.SM.5LZVI	65	Muscle - Skeletal	OLD	Muscle
GTEX.12WSM.2126.SM.5GCOC	65	Brain - Cerebellum	OLD	Brain
GTEX.12WSN.2526.SM.5LZU8	45	Muscle - Skeletal	YOUNG	Muscle
GTEX.12ZZW.0926.SM.5LZUD	55	Lung	OLD	Lung
GTEX.12ZZW.1026.SM.5GCMM	55	Heart - Left Ventricle	OLD	Heart
GTEX.12ZZY.0626.SM.5EQ5T	65	Muscle - Skeletal	OLD	Muscle
GTEX.12ZZY.0926.SM.5EQ6I	65	Lung	OLD	Lung
GTEX.12ZZY.1126.SM.5DUWQ	65	Heart - Left Ventricle	OLD	Heart
GTEX.12ZZY.2926.SM.5DUXO	65	Brain - Cerebellum	OLD	Brain
GTEX.12ZZZ.0226.SM.59HKU	65	Muscle - Skeletal	OLD	Muscle
GTEX.12ZZZ.1726.SM.59HK5	65	Heart - Left Ventricle	OLD	Heart
GTEX.12ZZZ.3126.SM.5LZU6	65	Brain - Cerebellum	OLD	Brain
GTEX.13111.0426.SM.5DUXR	55	Lung	OLD	Lung
GTEX.13111.1226.SM.5GCNC	55	Stomach	OLD	Stomach
GTEX.13111.2226.SM.5LZUE	55	Muscle - Skeletal	OLD	Muscle
GTEX.13112.0426.SM.5PNVC	55	Heart - Left Ventricle	OLD	Heart
GTEX.13112.2626.SM.5BC66	55	Muscle - Skeletal	OLD	Muscle
GTEX.13112.2926.SM.5DUWT	55	Brain - Cerebellum	OLD	Brain
GTEX.1314G.0126.SM.5LZUL	35	Heart - Left Ventricle	YOUNG	Heart
GTEX.1314G.1726.SM.5LZUX	35	Muscle - Skeletal	YOUNG	Muscle
GTEX.131XE.0626.SM.5HL98	55	Heart - Left Ventricle	OLD	Heart
GTEX.131XE.0726.SM.5HL9K	55	Lung	OLD	Lung
GTEX.131XE.2226.SM.5PNYX	55	Stomach	OLD	Stomach
GTEX.131XE.2726.SM.5P9G7	55	Muscle - Skeletal	OLD	Muscle
GTEX.131XF.1026.SM.5BC6A	65	Lung	OLD	Lung
GTEX.131XF.1226.SM.5HL8V	65	Stomach	OLD	Stomach
GTEX.131XF.2326.SM.5BC6B	65	Muscle - Skeletal	OLD	Muscle
GTEX.131XH.0226.SM.5LZVB	55	Heart - Left Ventricle	OLD	Heart
GTEX.131XH.0426.SM.5DUWU	55	Lung	OLD	Lung
GTEX.131XH.2726.SM.5GCO2	55	Muscle - Skeletal	OLD	Muscle
GTEX.131XH.2926.SM.5LZU4	55	Brain - Cerebellum	OLD	Brain
GTEX.132NY.0726.SM.5KLZM	65	Muscle - Skeletal	OLD	Muscle
GTEX.132NY.1226.SM.5PNVF	65	Lung	OLD	Lung
GTEX.132NY.1726.SM.5EGKK	65	Heart - Left Ventricle	OLD	Heart
GTEX.132Q8.0626.SM.5L3F3	65	Muscle - Skeletal	OLD	Muscle
GTEX.132Q8.2926.SM.5IFFP	65	Brain - Cerebellum	OLD	Brain
GTEX.132QS.0426.SM.5KLZ6	65	Heart - Left Ventricle	OLD	Heart
GTEX.132QS.0726.SM.5IJE9	65	Lung	OLD	Lung
GTEX.132QS.1826.SM.5IFFN	65	Stomach	OLD	Stomach
GTEX.1339X.0426.SM.5KLZY	45	Heart - Left Ventricle	YOUNG	Heart
GTEX.1339X.0626.SM.5IJER	45	Lung	YOUNG	Lung
GTEX.1339X.1426.SM.5K7YO	45	Stomach	YOUNG	Stomach
GTEX.1339X.2426.SM.5KLYU	45	Muscle - Skeletal	YOUNG	Muscle
GTEX.1399Q.2426.SM.5J2MO	45	Muscle - Skeletal	YOUNG	Muscle
GTEX.1399R.1126.SM.5IFIO	35	Stomach	YOUNG	Stomach
GTEX.1399R.1926.SM.5K7X8	35	Heart - Left Ventricle	YOUNG	Heart
GTEX.1399R.2526.SM.5IFG2	35	Muscle - Skeletal	YOUNG	Muscle
GTEX.1399T.0426.SM.5PNVJ	65	Heart - Left Ventricle	OLD	Heart
GTEX.1399T.2426.SM.5L3FJ	65	Muscle - Skeletal	OLD	Muscle
GTEX.1399T.3126.SM.5IJFS	65	Brain - Cerebellum	OLD	Brain
GTEX.139T6.0426.SM.5IJEM	55	Lung	OLD	Lung
GTEX.139T6.2026.SM.5IFFL	55	Muscle - Skeletal	OLD	Muscle
GTEX.139TS.2626.SM.5J1MT	65	Muscle - Skeletal	OLD	Muscle
GTEX.139TS.3126.SM.5LZWX	65	Brain - Cerebellum	OLD	Brain
GTEX.139TT.0426.SM.5IJFA	65	Muscle - Skeletal	OLD	Muscle
GTEX.139TT.0726.SM.5K7XW	65	Lung	OLD	Lung
GTEX.139TT.2626.SM.5LZUB	65	Brain - Cerebellum	OLD	Brain
GTEX.139TU.0526.SM.5J2M8	65	Muscle - Skeletal	OLD	Muscle
GTEX.139UW.0226.SM.5K7WU	65	Lung	OLD	Lung
GTEX.139UW.2626.SM.5K7W1	65	Muscle - Skeletal	OLD	Muscle
GTEX.139YR.0826.SM.5LZXY	55	Heart - Left Ventricle	OLD	Heart
GTEX.139YR.0926.SM.5LZYB	55	Lung	OLD	Lung
GTEX.139YR.1926.SM.5LZXM	55	Stomach	OLD	Stomach
GTEX.139YR.2526.SM.5IJC6	55	Muscle - Skeletal	OLD	Muscle
GTEX.13CF2.0426.SM.5KM1H	65	Heart - Left Ventricle	OLD	Heart
GTEX.13CF2.2726.SM.5LZWW	65	Muscle - Skeletal	OLD	Muscle
GTEX.13CF2.3026.SM.5IFFX	65	Brain - Cerebellum	OLD	Brain
GTEX.13FHO.0726.SM.5IJDG	65	Muscle - Skeletal	OLD	Muscle
GTEX.13FHO.1026.SM.5KM1Q	65	Lung	OLD	Lung
GTEX.13FHO.2926.SM.5L3ES	65	Brain - Cerebellum	OLD	Brain
GTEX.13FHP.0526.SM.5K7UY	55	Muscle - Skeletal	OLD	Muscle
GTEX.13FHP.0726.SM.5K7YI	55	Lung	OLD	Lung
GTEX.13FHP.1026.SM.5K7Y2	55	Heart - Left Ventricle	OLD	Heart
GTEX.13FHP.2926.SM.5IJG9	55	Brain - Cerebellum	OLD	Brain
GTEX.13FLV.0426.SM.5KLZA	55	Lung	OLD	Lung
GTEX.13FLV.0926.SM.5L3DZ	55	Heart - Left Ventricle	OLD	Heart
GTEX.13FTW.1026.SM.5L3E3	45	Heart - Left Ventricle	YOUNG	Heart
GTEX.13FTW.1726.SM.5KM2B	45	Stomach	YOUNG	Stomach
GTEX.13FTW.2326.SM.5K7YS	45	Muscle - Skeletal	YOUNG	Muscle
GTEX.13FTZ.0226.SM.5K7X6	65	Heart - Left Ventricle	OLD	Heart
GTEX.13FTZ.0526.SM.5IJCW	65	Lung	OLD	Lung
GTEX.13FTZ.2226.SM.5LZXI	65	Muscle - Skeletal	OLD	Muscle
GTEX.13FXS.0326.SM.5K7TV	55	Muscle - Skeletal	OLD	Muscle
GTEX.13FXS.3026.SM.5LZYO	55	Brain - Cerebellum	OLD	Brain
GTEX.13G51.0426.SM.5K7Z5	65	Lung	OLD	Lung
GTEX.13G51.2726.SM.5LZZ9	65	Muscle - Skeletal	OLD	Muscle
GTEX.13G51.3126.SM.5IJG7	65	Brain - Cerebellum	OLD	Brain
GTEX.13IVO.0626.SM.5LZYJ	75	Muscle - Skeletal	OLD	Muscle
GTEX.13JVG.0126.SM.5L3D3	65	Muscle - Skeletal	OLD	Muscle
GTEX.13JVG.1326.SM.5N9F8	65	Heart - Left Ventricle	OLD	Heart
GTEX.13JVG.1426.SM.5MR4W	65	Lung	OLD	Lung
GTEX.13JVG.3226.SM.5IJGJ	65	Brain - Cerebellum	OLD	Brain
GTEX.13N1W.0526.SM.5MR4I	75	Muscle - Skeletal	OLD	Muscle
GTEX.13N1W.0726.SM.5MR57	75	Lung	OLD	Lung
GTEX.13N1W.1026.SM.5IJC5	75	Heart - Left Ventricle	OLD	Heart
GTEX.13N1W.2026.SM.5K7YU	75	Stomach	OLD	Stomach
GTEX.13N2G.0826.SM.5IJE6	65	Lung	OLD	Lung
GTEX.13N2G.2326.SM.5J1ON	65	Muscle - Skeletal	OLD	Muscle
GTEX.13N2G.3126.SM.5IJGL	65	Brain - Cerebellum	OLD	Brain
GTEX.13NYB.0226.SM.5N9G4	45	Heart - Left Ventricle	YOUNG	Heart
GTEX.13NYB.0626.SM.5MR47	45	Lung	YOUNG	Lung
GTEX.13NYB.2726.SM.5J2MT	45	Muscle - Skeletal	YOUNG	Muscle
GTEX.13NYB.3226.SM.5J2ND	45	Brain - Cerebellum	YOUNG	Brain
GTEX.13NYC.0726.SM.5J2NQ	65	Muscle - Skeletal	OLD	Muscle
GTEX.13NZ9.0626.SM.5IJCO	55	Muscle - Skeletal	OLD	Muscle
GTEX.13NZ9.0926.SM.5KM12	55	Lung	OLD	Lung
GTEX.13NZA.0526.SM.5L3D7	65	Muscle - Skeletal	OLD	Muscle
GTEX.13NZA.1426.SM.5KM4Y	65	Lung	OLD	Lung
GTEX.13NZB.0226.SM.5KM1T	35	Heart - Left Ventricle	YOUNG	Heart
GTEX.13NZB.2626.SM.5J2M7	35	Muscle - Skeletal	YOUNG	Muscle
GTEX.13O21.0926.SM.5IFGT	55	Stomach	OLD	Stomach
GTEX.13O21.1726.SM.5MR5A	55	Muscle - Skeletal	OLD	Muscle
GTEX.13O21.2326.SM.5MR3X	55	Heart - Left Ventricle	OLD	Heart
GTEX.13O21.3026.SM.5J2NI	55	Lung	OLD	Lung
GTEX.13O3P.0626.SM.5L3D5	55	Muscle - Skeletal	OLD	Muscle
GTEX.13O3P.1026.SM.5N9E7	55	Lung	OLD	Lung
GTEX.13O3P.1626.SM.5K7X3	55	Heart - Left Ventricle	OLD	Heart
GTEX.13O3Q.0526.SM.5KM18	55	Lung	OLD	Lung
GTEX.13O3Q.2126.SM.5KM4C	55	Stomach	OLD	Stomach
GTEX.13O3Q.2726.SM.5KM51	55	Muscle - Skeletal	OLD	Muscle
GTEX.13O3Q.3026.SM.5IJGD	55	Brain - Cerebellum	OLD	Brain
GTEX.13O61.0526.SM.5J2M1	65	Heart - Left Ventricle	OLD	Heart
GTEX.13O61.0726.SM.5J2MD	65	Lung	OLD	Lung
GTEX.13O61.1126.SM.5L3FI	65	Stomach	OLD	Stomach
GTEX.13O61.2326.SM.5J1NJ	65	Muscle - Skeletal	OLD	Muscle
GTEX.13OVG.0326.SM.5KM57	65	Lung	OLD	Lung
GTEX.13OVG.0526.SM.5K7YD	65	Heart - Left Ventricle	OLD	Heart
GTEX.13OVG.2126.SM.5KM1K	65	Muscle - Skeletal	OLD	Muscle
GTEX.13OVH.0626.SM.5L3EI	75	Muscle - Skeletal	OLD	Muscle
GTEX.13OVH.1026.SM.5J2NP	75	Lung	OLD	Lung
GTEX.13OVH.2926.SM.5IJFH	75	Brain - Cerebellum	OLD	Brain
GTEX.13OVK.0926.SM.7KUFX	45	Stomach	YOUNG	Stomach
GTEX.13OVK.1926.SM.6M48G	45	Muscle - Skeletal	YOUNG	Muscle
GTEX.13OVL.0526.SM.5KLZQ	55	Heart - Left Ventricle	OLD	Heart
GTEX.13OVL.0626.SM.5KM13	55	Lung	OLD	Lung
GTEX.13OVL.1426.SM.5IJC1	55	Muscle - Skeletal	OLD	Muscle
GTEX.13OVL.3026.SM.5IJF1	55	Brain - Cerebellum	OLD	Brain
GTEX.13OW5.0326.SM.5L3HK	65	Muscle - Skeletal	OLD	Muscle
GTEX.13OW5.0726.SM.5KLZK	65	Lung	OLD	Lung
GTEX.13OW5.1126.SM.5J1NR	65	Heart - Left Ventricle	OLD	Heart
GTEX.13OW5.3126.SM.5MR3Y	65	Brain - Cerebellum	OLD	Brain
GTEX.13OW6.0626.SM.5L3IB	55	Muscle - Skeletal	OLD	Muscle
GTEX.13OW6.0826.SM.5L3GA	55	Lung	OLD	Lung
GTEX.13OW6.1126.SM.5L3HL	55	Heart - Left Ventricle	OLD	Heart
GTEX.13OW6.2526.SM.5IJEC	55	Stomach	OLD	Stomach
GTEX.13OW6.2926.SM.5KM29	55	Brain - Cerebellum	OLD	Brain
GTEX.13OW7.0326.SM.5J1MP	55	Muscle - Skeletal	OLD	Muscle
GTEX.13OW7.0926.SM.5L3EX	55	Lung	OLD	Lung
GTEX.13OW7.2926.SM.5MR3Z	55	Brain - Cerebellum	OLD	Brain
GTEX.13OW8.1426.SM.5IJDT	65	Muscle - Skeletal	OLD	Muscle
GTEX.13OW8.1726.SM.5L3GO	65	Lung	OLD	Lung
GTEX.13OW8.2126.SM.5J1OS	65	Heart - Left Ventricle	OLD	Heart
GTEX.13OW8.2926.SM.5L3FV	65	Brain - Cerebellum	OLD	Brain
GTEX.13PDP.0326.SM.5K7XP	65	Muscle - Skeletal	OLD	Muscle
GTEX.13PVQ.0326.SM.5K7YF	55	Muscle - Skeletal	OLD	Muscle
GTEX.13PVQ.0926.SM.5IJFD	55	Lung	OLD	Lung
GTEX.13PVQ.1226.SM.5IJDC	55	Heart - Left Ventricle	OLD	Heart
GTEX.13PVQ.2126.SM.5L3FW	55	Stomach	OLD	Stomach
GTEX.13PVQ.2926.SM.5L3HJ	55	Brain - Cerebellum	OLD	Brain
GTEX.13QJ3.0726.SM.5SI68	55	Muscle - Skeletal	OLD	Muscle
GTEX.13QJ3.1026.SM.5QGQU	55	Lung	OLD	Lung
GTEX.13QJ3.2726.SM.5SI6L	55	Stomach	OLD	Stomach
GTEX.13RTJ.0726.SM.5QGQN	65	Heart - Left Ventricle	OLD	Heart
GTEX.13RTJ.1126.SM.5S2UJ	65	Lung	OLD	Lung
GTEX.13RTJ.2726.SM.73KVG	65	Muscle - Skeletal	OLD	Muscle
GTEX.13RTJ.3126.SM.5S2Q4	65	Brain - Cerebellum	OLD	Brain
GTEX.13RTK.0226.SM.5RQHR	25	Stomach	YOUNG	Stomach
GTEX.13RTK.1626.SM.5QGQS	25	Muscle - Skeletal	YOUNG	Muscle
GTEX.13RTL.0326.SM.7LT89	45	Muscle - Skeletal	YOUNG	Muscle
GTEX.13S86.0226.SM.5S2PJ	45	Heart - Left Ventricle	YOUNG	Heart
GTEX.13S86.0626.SM.5Q5E7	45	Lung	YOUNG	Lung
GTEX.13S86.2326.SM.5RQK1	45	Muscle - Skeletal	YOUNG	Muscle
GTEX.13SLW.0326.SM.5RQK5	75	Muscle - Skeletal	OLD	Muscle
GTEX.13SLW.1226.SM.5S2Q7	75	Lung	OLD	Lung
GTEX.13VXU.0326.SM.5LU36	55	Muscle - Skeletal	OLD	Muscle
GTEX.13VXU.2726.SM.5LU4N	55	Lung	OLD	Lung
GTEX.13VXU.3026.SM.5LU3K	55	Brain - Cerebellum	OLD	Brain
GTEX.13W46.0726.SM.5LU3Z	55	Muscle - Skeletal	OLD	Muscle
GTEX.13X6I.0526.SM.5QGP8	65	Muscle - Skeletal	OLD	Muscle
GTEX.13X6I.1426.SM.5SI9Z	65	Heart - Left Ventricle	OLD	Heart
GTEX.13X6I.2926.SM.5Q5C3	65	Brain - Cerebellum	OLD	Brain
GTEX.13X6J.0326.SM.7EPGD	55	Muscle - Skeletal	OLD	Muscle
GTEX.13X6J.2126.SM.5TDCV	55	Stomach	OLD	Stomach
GTEX.13X6J.2926.SM.7EPGP	55	Brain - Cerebellum	OLD	Brain
GTEX.13YAN.0526.SM.5O9BE	65	Muscle - Skeletal	OLD	Muscle
GTEX.13YAN.1026.SM.5O9CF	65	Lung	OLD	Lung
GTEX.13YAN.1326.SM.5Q5F1	65	Heart - Left Ventricle	OLD	Heart
GTEX.1445S.0626.SM.5LU3C	65	Muscle - Skeletal	OLD	Muscle
GTEX.144FL.0326.SM.5O99O	55	Muscle - Skeletal	OLD	Muscle
GTEX.144GL.0326.SM.5QGOY	55	Muscle - Skeletal	OLD	Muscle
GTEX.144GL.2926.SM.5O99F	55	Brain - Cerebellum	OLD	Brain
GTEX.144GM.0126.SM.5Q5AX	25	Lung	YOUNG	Lung
GTEX.144GM.1726.SM.5O9AS	25	Stomach	YOUNG	Stomach
GTEX.144GM.2026.SM.5LU3D	25	Muscle - Skeletal	YOUNG	Muscle
GTEX.145LU.0526.SM.5O9AT	55	Lung	OLD	Lung
GTEX.145LU.2026.SM.5Q5E8	55	Muscle - Skeletal	OLD	Muscle
GTEX.145LU.2626.SM.5LU9Z	55	Brain - Cerebellum	OLD	Brain
GTEX.145MF.0726.SM.5Q5BT	55	Lung	OLD	Lung
GTEX.145MF.2826.SM.7EPGU	55	Brain - Cerebellum	OLD	Brain
GTEX.145MG.0226.SM.5TDDB	55	Muscle - Skeletal	OLD	Muscle
GTEX.145MG.3126.SM.5Q5D3	55	Brain - Cerebellum	OLD	Brain
GTEX.145MH.0326.SM.5LU8H	55	Muscle - Skeletal	OLD	Muscle
GTEX.145MH.0626.SM.5NQAK	55	Lung	OLD	Lung
GTEX.145MH.2926.SM.5Q5D2	55	Brain - Cerebellum	OLD	Brain
GTEX.145MN.0626.SM.5QGRH	35	Heart - Left Ventricle	YOUNG	Heart
GTEX.145MN.0926.SM.5NQBT	35	Lung	YOUNG	Lung
GTEX.145MN.1326.SM.5NQ9S	35	Stomach	YOUNG	Stomach
GTEX.145MN.2426.SM.5NQA5	35	Muscle - Skeletal	YOUNG	Muscle
GTEX.145MO.0726.SM.5NQB9	65	Muscle - Skeletal	OLD	Muscle
GTEX.145MO.1126.SM.5NQBX	65	Heart - Left Ventricle	OLD	Heart
GTEX.145MO.1326.SM.5Q5EF	65	Lung	OLD	Lung
GTEX.145MO.2226.SM.5Q5BN	65	Stomach	OLD	Stomach
GTEX.146FQ.0326.SM.5NQAX	35	Muscle - Skeletal	YOUNG	Muscle
GTEX.146FQ.0926.SM.5LUAV	35	Lung	YOUNG	Lung
GTEX.14753.0526.SM.5QGPR	65	Muscle - Skeletal	OLD	Muscle
GTEX.1477Z.0626.SM.5NQB7	65	Lung	OLD	Lung
GTEX.1477Z.1626.SM.5SIA8	65	Muscle - Skeletal	OLD	Muscle
GTEX.147F4.0326.SM.5TDCK	55	Muscle - Skeletal	OLD	Muscle
GTEX.147F4.0926.SM.5Q5EO	55	Lung	OLD	Lung
GTEX.147F4.1226.SM.5NQAY	55	Heart - Left Ventricle	OLD	Heart
GTEX.147F4.3026.SM.5Q5BJ	55	Brain - Cerebellum	OLD	Brain
GTEX.147GR.0126.SM.62LER	65	Muscle - Skeletal	OLD	Muscle
GTEX.147GR.1226.SM.5TDCL	65	Lung	OLD	Lung
GTEX.147GR.3126.SM.5S2PM	65	Brain - Cerebellum	OLD	Brain
GTEX.147JS.0526.SM.5TDD3	65	Muscle - Skeletal	OLD	Muscle
GTEX.147JS.1226.SM.5RQK4	65	Lung	OLD	Lung
GTEX.147JS.1526.SM.5ZZWF	65	Heart - Left Ventricle	OLD	Heart
GTEX.148VJ.0326.SM.5QGQE	75	Muscle - Skeletal	OLD	Muscle
GTEX.148VJ.0826.SM.5LU8V	75	Lung	OLD	Lung
GTEX.148VJ.1526.SM.5Q5DU	75	Heart - Left Ventricle	OLD	Heart
GTEX.1497J.0326.SM.5Q5CN	65	Lung	OLD	Lung
GTEX.1497J.1226.SM.5Q5BL	65	Heart - Left Ventricle	OLD	Heart
GTEX.1497J.2626.SM.5SI9K	65	Muscle - Skeletal	OLD	Muscle
GTEX.14A5H.0326.SM.5RQIB	65	Muscle - Skeletal	OLD	Muscle
GTEX.14A6H.0226.SM.5Q5DX	35	Heart - Left Ventricle	YOUNG	Heart
GTEX.14A6H.0526.SM.5NQAZ	35	Lung	YOUNG	Lung
GTEX.14ABY.0126.SM.62LDI	55	Muscle - Skeletal	OLD	Muscle
GTEX.14ABY.1126.SM.5Q5F8	55	Lung	OLD	Lung
GTEX.14ABY.3026.SM.664NE	55	Brain - Cerebellum	OLD	Brain
GTEX.14ASI.0526.SM.5QGQP	65	Muscle - Skeletal	OLD	Muscle
GTEX.14ASI.2926.SM.5Q5DG	65	Brain - Cerebellum	OLD	Brain
GTEX.14B4R.0726.SM.5TDDR	35	Stomach	YOUNG	Stomach
GTEX.14BIL.0326.SM.5SI9Q	55	Muscle - Skeletal	OLD	Muscle
GTEX.14BIL.1126.SM.79OMC	55	Heart - Left Ventricle	OLD	Heart
GTEX.14BIL.1226.SM.79OME	55	Lung	OLD	Lung
GTEX.14BIL.1926.SM.73KYI	55	Stomach	OLD	Stomach
GTEX.14BMV.0326.SM.5RQHW	55	Muscle - Skeletal	OLD	Muscle
GTEX.14BMV.0826.SM.73KXU	55	Lung	OLD	Lung
GTEX.14BMV.2226.SM.5RQHX	55	Stomach	OLD	Stomach
GTEX.14BMV.2926.SM.5TDEE	55	Brain - Cerebellum	OLD	Brain
GTEX.14C38.0426.SM.5TDDZ	55	Muscle - Skeletal	OLD	Muscle
GTEX.14C38.1426.SM.5RQHZ	55	Heart - Left Ventricle	OLD	Heart
GTEX.14C39.0326.SM.5TDDX	45	Lung	YOUNG	Lung
GTEX.14C39.0926.SM.5TDDV	45	Heart - Left Ventricle	YOUNG	Heart
GTEX.14C39.2426.SM.5S2U5	45	Muscle - Skeletal	YOUNG	Muscle
GTEX.14C39.3026.SM.5S2QE	45	Brain - Cerebellum	YOUNG	Brain
GTEX.14C5O.0626.SM.664N2	65	Muscle - Skeletal	OLD	Muscle
GTEX.14C5O.1126.SM.5TDEH	65	Lung	OLD	Lung
GTEX.14C5O.1326.SM.5S2UW	65	Heart - Left Ventricle	OLD	Heart
GTEX.14C5O.2926.SM.5RQI1	65	Brain - Cerebellum	OLD	Brain
GTEX.14DAR.0226.SM.5S2PR	55	Lung	OLD	Lung
GTEX.14DAR.0926.SM.73KUQ	55	Stomach	OLD	Stomach
GTEX.14DAR.1826.SM.664N1	55	Muscle - Skeletal	OLD	Muscle
GTEX.14E1K.0226.SM.62LDT	55	Lung	OLD	Lung
GTEX.14E1K.1026.SM.73KUR	55	Heart - Left Ventricle	OLD	Heart
GTEX.14E1K.1526.SM.664MN	55	Stomach	OLD	Stomach
GTEX.14E1K.2326.SM.664MP	55	Muscle - Skeletal	OLD	Muscle
GTEX.14E6C.0426.SM.5YYA8	45	Heart - Left Ventricle	YOUNG	Heart
GTEX.14E6C.1426.SM.5ZZWH	45	Lung	YOUNG	Lung
GTEX.14E6C.1526.SM.664ND	45	Muscle - Skeletal	YOUNG	Muscle
GTEX.14E6D.0326.SM.62LDX	55	Muscle - Skeletal	OLD	Muscle
GTEX.14E6D.0926.SM.5S2QV	55	Heart - Left Ventricle	OLD	Heart
GTEX.14E6D.1026.SM.5S2RS	55	Lung	OLD	Lung
GTEX.14E6D.2926.SM.664OP	55	Brain - Cerebellum	OLD	Brain
GTEX.14E6E.0426.SM.73KUE	35	Lung	YOUNG	Lung
GTEX.14E6E.0926.SM.664N8	35	Stomach	YOUNG	Stomach
GTEX.14E6E.2026.SM.664N5	35	Muscle - Skeletal	YOUNG	Muscle
GTEX.14E7W.1226.SM.5RQIU	75	Heart - Left Ventricle	OLD	Heart
GTEX.14E7W.1326.SM.5RQIV	75	Lung	OLD	Lung
GTEX.14E7W.2926.SM.5S2R8	75	Brain - Cerebellum	OLD	Brain
GTEX.14JFF.2826.SM.6871Q	65	Brain - Cerebellum	OLD	Brain
GTEX.14JG1.0126.SM.5ZZUP	45	Muscle - Skeletal	YOUNG	Muscle
GTEX.14JG1.0926.SM.5YY8W	45	Lung	YOUNG	Lung
GTEX.14JG1.1026.SM.6ETZY	45	Heart - Left Ventricle	YOUNG	Heart
GTEX.14JG1.2926.SM.686ZK	45	Brain - Cerebellum	YOUNG	Brain
GTEX.14JIY.0426.SM.62LF7	65	Muscle - Skeletal	OLD	Muscle
GTEX.14JIY.1126.SM.6EU28	65	Heart - Left Ventricle	OLD	Heart
GTEX.14JIY.1326.SM.6AJB3	65	Lung	OLD	Lung
GTEX.14JIY.2326.SM.6AJAJ	65	Brain - Cerebellum	OLD	Brain
GTEX.14PHX.1026.SM.664OL	55	Stomach	OLD	Stomach
GTEX.14PHX.2126.SM.6EU2U	55	Heart - Left Ventricle	OLD	Heart
GTEX.14PII.0626.SM.69LPY	65	Muscle - Skeletal	OLD	Muscle
GTEX.14PJ2.0326.SM.6EU2Q	55	Muscle - Skeletal	OLD	Muscle
GTEX.14PJ2.1026.SM.6EU1M	55	Heart - Left Ventricle	OLD	Heart
GTEX.14PJ3.1426.SM.664O8	55	Stomach	OLD	Stomach
GTEX.14PJ3.2026.SM.5ZZVK	55	Muscle - Skeletal	OLD	Muscle
GTEX.14PJ4.0626.SM.6AJBS	65	Lung	OLD	Lung
GTEX.14PJ4.1126.SM.5YY91	65	Heart - Left Ventricle	OLD	Heart
GTEX.14PJ4.1626.SM.664OB	65	Stomach	OLD	Stomach
GTEX.14PJ4.2426.SM.6EU1U	65	Muscle - Skeletal	OLD	Muscle
GTEX.14PJN.2126.SM.6AJBM	35	Muscle - Skeletal	YOUNG	Muscle
GTEX.14PJO.0526.SM.6EU2O	65	Muscle - Skeletal	OLD	Muscle
GTEX.14PJO.0926.SM.686YT	65	Lung	OLD	Lung
GTEX.14PJO.2926.SM.686ZI	65	Brain - Cerebellum	OLD	Brain
GTEX.14PN4.0326.SM.6EU2N	55	Muscle - Skeletal	OLD	Muscle
GTEX.14PN4.3026.SM.664O4	55	Brain - Cerebellum	OLD	Brain
GTEX.15CHQ.0726.SM.6EU18	65	Muscle - Skeletal	OLD	Muscle
GTEX.15CHQ.1526.SM.69LPW	65	Heart - Left Ventricle	OLD	Heart
GTEX.15CHR.0226.SM.7PC2Z	55	Heart - Left Ventricle	OLD	Heart
GTEX.15CHR.0726.SM.7EPHG	55	Lung	OLD	Lung
GTEX.15CHR.1326.SM.79OLT	55	Stomach	OLD	Stomach
GTEX.15CHR.2426.SM.7DUFX	55	Muscle - Skeletal	OLD	Muscle
GTEX.15D1Q.0526.SM.6AJAY	45	Lung	YOUNG	Lung
GTEX.15D79.0526.SM.6ETZP	55	Muscle - Skeletal	OLD	Muscle
GTEX.15DCE.1626.SM.6LPJM	25	Stomach	YOUNG	Stomach
GTEX.15EO6.2826.SM.6PANB	55	Muscle - Skeletal	OLD	Muscle
GTEX.15EO6.2926.SM.6M48D	55	Brain - Cerebellum	OLD	Brain
GTEX.15EU6.1226.SM.6AJBE	55	Lung	OLD	Lung
GTEX.15EU6.2526.SM.7KUGB	55	Stomach	OLD	Stomach
GTEX.15G19.0526.SM.6PAMT	65	Muscle - Skeletal	OLD	Muscle
GTEX.15G19.1526.SM.6LPKP	65	Stomach	OLD	Stomach
GTEX.15G19.2826.SM.6M48K	65	Brain - Cerebellum	OLD	Brain
GTEX.15G1A.0426.SM.6M468	35	Lung	YOUNG	Lung
GTEX.15G1A.1226.SM.7KUF3	35	Stomach	YOUNG	Stomach
GTEX.15G1A.2026.SM.7KUFG	35	Muscle - Skeletal	YOUNG	Muscle
GTEX.15RIE.0326.SM.6PAMC	65	Lung	OLD	Lung
GTEX.15RIE.1026.SM.6LPJQ	65	Stomach	OLD	Stomach
GTEX.15RIE.1726.SM.7KUMU	65	Heart - Left Ventricle	OLD	Heart
GTEX.15RIE.2426.SM.7KUDS	65	Muscle - Skeletal	OLD	Muscle
GTEX.15RIF.1126.SM.7KUG2	25	Stomach	YOUNG	Stomach
GTEX.15RIF.2126.SM.7KUM8	25	Muscle - Skeletal	YOUNG	Muscle
GTEX.15RIG.0426.SM.7KUF4	45	Muscle - Skeletal	YOUNG	Muscle
GTEX.15RJ7.0226.SM.7KUMN	45	Heart - Left Ventricle	YOUNG	Heart
GTEX.15RJ7.0626.SM.6M47V	45	Lung	YOUNG	Lung
GTEX.15RJ7.2426.SM.6M48L	45	Muscle - Skeletal	YOUNG	Muscle
GTEX.15RJE.0626.SM.7KUKR	45	Heart - Left Ventricle	YOUNG	Heart
GTEX.15RJE.1026.SM.6M46X	45	Lung	YOUNG	Lung
GTEX.15SHV.0326.SM.6M475	65	Lung	OLD	Lung
GTEX.15SHV.2526.SM.6PAMG	65	Muscle - Skeletal	OLD	Muscle
GTEX.15SHW.0726.SM.7KUEI	65	Muscle - Skeletal	OLD	Muscle
GTEX.15SHW.0926.SM.6LPIO	65	Lung	OLD	Lung
GTEX.15SHW.1226.SM.6M46C	65	Heart - Left Ventricle	OLD	Heart
GTEX.15SHW.2126.SM.6M46Y	65	Stomach	OLD	Stomach
GTEX.15SKB.0826.SM.7KUFB	65	Lung	OLD	Lung
GTEX.15SKB.2526.SM.6PALP	65	Muscle - Skeletal	OLD	Muscle
GTEX.15UF7.1226.SM.6M46G	45	Stomach	YOUNG	Stomach
GTEX.15UF7.2226.SM.6PAMQ	45	Muscle - Skeletal	YOUNG	Muscle
GTEX.15UKP.0326.SM.7KUFP	25	Muscle - Skeletal	YOUNG	Muscle
GTEX.15UKP.1926.SM.6LPI9	25	Lung	YOUNG	Lung
GTEX.169BO.0226.SM.79OL1	55	Lung	OLD	Lung
GTEX.169BO.1526.SM.9KNVR	55	Muscle - Skeletal	OLD	Muscle
GTEX.16AAH.0426.SM.7DUFM	55	Lung	OLD	Lung
GTEX.16AAH.1226.SM.79OO9	55	Stomach	OLD	Stomach
GTEX.16AAH.1826.SM.7939D	55	Muscle - Skeletal	OLD	Muscle
GTEX.16GPK.0526.SM.7KUER	65	Muscle - Skeletal	OLD	Muscle
GTEX.16GPK.1826.SM.7MGW5	65	Lung	OLD	Lung
GTEX.16MTA.1226.SM.7KULL	55	Lung	OLD	Lung
GTEX.16MTA.2026.SM.7KUL3	55	Muscle - Skeletal	OLD	Muscle
GTEX.16NPX.0626.SM.7KULB	55	Muscle - Skeletal	OLD	Muscle
GTEX.16NPX.0926.SM.7KUEZ	55	Heart - Left Ventricle	OLD	Heart
GTEX.16XZY.0426.SM.793BI	75	Heart - Left Ventricle	OLD	Heart
GTEX.16XZY.2226.SM.7938N	75	Muscle - Skeletal	OLD	Muscle
GTEX.16XZZ.0526.SM.7KUF1	65	Muscle - Skeletal	OLD	Muscle
GTEX.16XZZ.0926.SM.7DHLI	65	Lung	OLD	Lung
GTEX.16XZZ.2926.SM.6LPK4	65	Brain - Cerebellum	OLD	Brain
GTEX.16YQH.0426.SM.7KUL7	35	Muscle - Skeletal	YOUNG	Muscle
GTEX.16YQH.0926.SM.793BC	35	Heart - Left Ventricle	YOUNG	Heart
GTEX.16YQH.2926.SM.6LPJE	35	Brain - Cerebellum	YOUNG	Brain
GTEX.178AV.0326.SM.6LPJF	45	Lung	YOUNG	Lung
GTEX.17EUY.0626.SM.793BE	25	Muscle - Skeletal	YOUNG	Muscle
GTEX.17EUY.1526.SM.793CA	25	Stomach	YOUNG	Stomach
GTEX.17EVP.0726.SM.7EWDX	45	Lung	YOUNG	Lung
GTEX.17EVP.1326.SM.7DHMR	45	Muscle - Skeletal	YOUNG	Muscle
GTEX.17EVP.2926.SM.793BU	45	Brain - Cerebellum	YOUNG	Brain
GTEX.17EVQ.1226.SM.7LG59	75	Muscle - Skeletal	OLD	Muscle
GTEX.17EVQ.1526.SM.79ONG	75	Lung	OLD	Lung
GTEX.17EVQ.2726.SM.7EWDT	75	Brain - Cerebellum	OLD	Brain
GTEX.17F96.0626.SM.793CC	75	Lung	OLD	Lung
GTEX.17F96.2726.SM.7LT9F	75	Muscle - Skeletal	OLD	Muscle
GTEX.17F97.0526.SM.7DUF8	55	Muscle - Skeletal	OLD	Muscle
GTEX.17F97.2926.SM.7DUEQ	55	Brain - Cerebellum	OLD	Brain
GTEX.17F9E.0226.SM.79OKK	55	Muscle - Skeletal	OLD	Muscle
GTEX.17F9E.0926.SM.7IGMG	55	Heart - Left Ventricle	OLD	Heart
GTEX.17F9E.2226.SM.7IGNC	55	Stomach	OLD	Stomach
GTEX.17GQL.0526.SM.72D5N	65	Heart - Left Ventricle	OLD	Heart
GTEX.17GQL.0726.SM.731BL	65	Lung	OLD	Lung
GTEX.17GQL.1226.SM.7KFTS	65	Stomach	OLD	Stomach
GTEX.17GQL.1926.SM.718B9	65	Muscle - Skeletal	OLD	Muscle
GTEX.17HGU.0626.SM.7939Y	55	Muscle - Skeletal	OLD	Muscle
GTEX.17HGU.0926.SM.79OKO	55	Lung	OLD	Lung
GTEX.17HGU.1026.SM.79OKL	55	Heart - Left Ventricle	OLD	Heart
GTEX.17HGU.2126.SM.7IGOV	55	Stomach	OLD	Stomach
GTEX.17HHE.0626.SM.7DHL6	55	Lung	OLD	Lung
GTEX.17HHE.1026.SM.79ON6	55	Stomach	OLD	Stomach
GTEX.17HHE.2126.SM.7DHLO	55	Muscle - Skeletal	OLD	Muscle
GTEX.17HHY.0326.SM.7938H	55	Muscle - Skeletal	OLD	Muscle
GTEX.17HHY.1426.SM.7EWDQ	55	Heart - Left Ventricle	OLD	Heart
GTEX.17HHY.2926.SM.79OJW	55	Brain - Cerebellum	OLD	Brain
GTEX.17HII.0426.SM.793A3	55	Muscle - Skeletal	OLD	Muscle
GTEX.17HII.0926.SM.79ON7	55	Lung	OLD	Lung
GTEX.17HII.1326.SM.7IGOB	55	Heart - Left Ventricle	OLD	Heart
GTEX.17HII.2426.SM.7KFTT	55	Stomach	OLD	Stomach
GTEX.17HII.2926.SM.79OMK	55	Brain - Cerebellum	OLD	Brain
GTEX.17KNJ.0826.SM.793A4	55	Heart - Left Ventricle	OLD	Heart
GTEX.17KNJ.0926.SM.7IGP2	55	Lung	OLD	Lung
GTEX.17KNJ.1526.SM.7LTA9	55	Stomach	OLD	Stomach
GTEX.17KNJ.2426.SM.7DHLR	55	Muscle - Skeletal	OLD	Muscle
GTEX.17MF6.0726.SM.7LT8E	45	Heart - Left Ventricle	YOUNG	Heart
GTEX.17MF6.0826.SM.7LT8F	45	Lung	YOUNG	Lung
GTEX.17MF6.2026.SM.7LG5I	45	Muscle - Skeletal	YOUNG	Muscle
GTEX.17MF6.2126.SM.7KFS7	45	Stomach	YOUNG	Stomach
GTEX.17MFQ.1926.SM.793A6	25	Muscle - Skeletal	YOUNG	Muscle
GTEX.183FY.0226.SM.7LG54	25	Muscle - Skeletal	YOUNG	Muscle
GTEX.183FY.0726.SM.793C3	25	Lung	YOUNG	Lung
GTEX.18465.0326.SM.7LTAD	55	Muscle - Skeletal	OLD	Muscle
GTEX.18465.0626.SM.7LT8X	55	Lung	OLD	Lung
GTEX.18465.0926.SM.731AY	55	Heart - Left Ventricle	OLD	Heart
GTEX.18465.2926.SM.7KFSE	55	Brain - Cerebellum	OLD	Brain
GTEX.18A66.0126.SM.731CQ	65	Muscle - Skeletal	OLD	Muscle
GTEX.18A66.0926.SM.718BG	65	Lung	OLD	Lung
GTEX.18A66.1226.SM.7LT8G	65	Heart - Left Ventricle	OLD	Heart
GTEX.18A66.2226.SM.7189E	65	Stomach	OLD	Stomach
GTEX.18A67.0326.SM.7LG5X	55	Muscle - Skeletal	OLD	Muscle
GTEX.18A67.1126.SM.7KFSB	55	Lung	OLD	Lung
GTEX.18A67.1226.SM.7KFRS	55	Heart - Left Ventricle	OLD	Heart
GTEX.18A67.2626.SM.718AD	55	Stomach	OLD	Stomach
GTEX.18A6Q.0326.SM.718AT	65	Muscle - Skeletal	OLD	Muscle
GTEX.18A6Q.0826.SM.7KFRD	65	Lung	OLD	Lung
GTEX.18A6Q.1626.SM.7KFTA	65	Heart - Left Ventricle	OLD	Heart
GTEX.18A6Q.2826.SM.7LTAO	65	Brain - Cerebellum	OLD	Brain
GTEX.18A7B.0326.SM.7LG65	75	Muscle - Skeletal	OLD	Muscle
GTEX.18D9U.0526.SM.72D7C	45	Lung	YOUNG	Lung
GTEX.18D9U.0626.SM.7LTA4	45	Muscle - Skeletal	YOUNG	Muscle
GTEX.18D9U.1126.SM.72D5Y	45	Heart - Left Ventricle	YOUNG	Heart
GTEX.18QFQ.0326.SM.731C3	35	Muscle - Skeletal	YOUNG	Muscle
GTEX.18QFQ.0926.SM.7LG4V	35	Lung	YOUNG	Lung
GTEX.18QFQ.1226.SM.718AE	35	Stomach	YOUNG	Stomach
GTEX.1A3MV.0526.SM.72D5A	35	Lung	YOUNG	Lung
GTEX.1A3MV.1226.SM.718BW	35	Stomach	YOUNG	Stomach
GTEX.1A3MV.2026.SM.718BU	35	Muscle - Skeletal	YOUNG	Muscle
GTEX.1A3MX.0526.SM.718A9	65	Muscle - Skeletal	OLD	Muscle
GTEX.1A3MX.1326.SM.72D58	65	Heart - Left Ventricle	OLD	Heart
GTEX.1A3MX.1926.SM.72D7F	65	Stomach	OLD	Stomach
GTEX.1A3MX.2926.SM.718B7	65	Brain - Cerebellum	OLD	Brain
GTEX.1A8G6.0126.SM.7DUFY	65	Muscle - Skeletal	OLD	Muscle
GTEX.1A8G6.0726.SM.73KV5	65	Lung	OLD	Lung
GTEX.1A8G6.1426.SM.731EZ	65	Stomach	OLD	Stomach
GTEX.1A8G6.1626.SM.7MGWO	65	Heart - Left Ventricle	OLD	Heart
GTEX.1A8G6.3126.SM.731D8	65	Brain - Cerebellum	OLD	Brain
GTEX.1A8G7.0326.SM.72D5B	65	Muscle - Skeletal	OLD	Muscle
GTEX.1A8G7.3026.SM.73KTT	65	Brain - Cerebellum	OLD	Brain
GTEX.1AX9I.0326.SM.73KXQ	65	Muscle - Skeletal	OLD	Muscle
GTEX.1AX9I.0826.SM.73KUT	65	Lung	OLD	Lung
GTEX.1AX9I.1126.SM.7EPHH	65	Heart - Left Ventricle	OLD	Heart
GTEX.1AX9J.0126.SM.73KY2	65	Muscle - Skeletal	OLD	Muscle
GTEX.1AX9J.1026.SM.72D6E	65	Heart - Left Ventricle	OLD	Heart
GTEX.1AX9J.1626.SM.73KUI	65	Lung	OLD	Lung
GTEX.1AX9J.2626.SM.731EK	65	Stomach	OLD	Stomach
GTEX.1AX9K.0526.SM.73KV1	55	Heart - Left Ventricle	OLD	Heart
GTEX.1AX9K.0826.SM.731F9	55	Lung	OLD	Lung
GTEX.1AX9K.2726.SM.7DHMA	55	Muscle - Skeletal	OLD	Muscle
GTEX.1AYCT.0426.SM.73KVZ	55	Heart - Left Ventricle	OLD	Heart
GTEX.1AYCT.0726.SM.7IGNG	55	Lung	OLD	Lung
GTEX.1AYCT.1326.SM.7MKHB	55	Stomach	OLD	Stomach
GTEX.1AYD5.1226.SM.7EWEP	55	Lung	OLD	Lung
GTEX.1AYD5.2226.SM.73KX3	55	Muscle - Skeletal	OLD	Muscle
GTEX.1B8KE.0126.SM.793AM	55	Heart - Left Ventricle	OLD	Heart
GTEX.1B8KE.1326.SM.73KVI	55	Stomach	OLD	Stomach
GTEX.1B8KE.2226.SM.7939K	55	Muscle - Skeletal	OLD	Muscle
GTEX.1B8KZ.0526.SM.73KW2	55	Lung	OLD	Lung
GTEX.1B8KZ.1226.SM.793CP	55	Stomach	OLD	Stomach
GTEX.1B8KZ.2126.SM.73KYG	55	Muscle - Skeletal	OLD	Muscle
GTEX.1B8L1.0526.SM.79ONX	65	Heart - Left Ventricle	OLD	Heart
GTEX.1B8L1.0626.SM.7EPHL	65	Lung	OLD	Lung
GTEX.1B8L1.1526.SM.79OLK	65	Stomach	OLD	Stomach
GTEX.1B8L1.2726.SM.793AL	65	Muscle - Skeletal	OLD	Muscle
GTEX.1B8L1.3226.SM.7P8OX	65	Brain - Cerebellum	OLD	Brain
GTEX.1B8SF.0426.SM.79OL4	65	Muscle - Skeletal	OLD	Muscle
GTEX.1B8SF.0826.SM.73KW8	65	Lung	OLD	Lung
GTEX.1B8SF.3026.SM.731DX	65	Brain - Cerebellum	OLD	Brain
GTEX.1B8SG.0326.SM.73KXW	55	Muscle - Skeletal	OLD	Muscle
GTEX.1B8SG.0826.SM.7EWF7	55	Heart - Left Ventricle	OLD	Heart
GTEX.1B8SG.1926.SM.73KUB	55	Brain - Cerebellum	OLD	Brain
GTEX.1B97I.0226.SM.73KVO	45	Lung	YOUNG	Lung
GTEX.1B97I.1226.SM.7MGWQ	45	Stomach	YOUNG	Stomach
GTEX.1B97I.2026.SM.7DHN2	45	Muscle - Skeletal	YOUNG	Muscle
GTEX.1B996.0326.SM.7DHMU	65	Muscle - Skeletal	OLD	Muscle
GTEX.1B996.0726.SM.7IGPI	65	Lung	OLD	Lung
GTEX.1B996.1126.SM.73KWN	65	Heart - Left Ventricle	OLD	Heart
GTEX.1B996.2926.SM.7MXUH	65	Brain - Cerebellum	OLD	Brain
GTEX.1BAJH.0126.SM.7DHMF	75	Muscle - Skeletal	OLD	Muscle
GTEX.1BAJH.1326.SM.7RHFS	75	Lung	OLD	Lung
GTEX.1BAJH.1626.SM.73KUV	75	Heart - Left Ventricle	OLD	Heart
GTEX.1BAJH.3126.SM.7MGXY	75	Brain - Cerebellum	OLD	Brain
GTEX.1C2JI.0526.SM.7EWEQ	55	Heart - Left Ventricle	OLD	Heart
GTEX.1C2JI.2126.SM.793CG	55	Muscle - Skeletal	OLD	Muscle
GTEX.1C4CL.0326.SM.7DHMH	35	Muscle - Skeletal	YOUNG	Muscle
GTEX.1C4CL.0826.SM.7EWEZ	35	Lung	YOUNG	Lung
GTEX.1C64N.0326.SM.7P8QC	55	Muscle - Skeletal	OLD	Muscle
GTEX.1C64N.3126.SM.79OO3	55	Brain - Cerebellum	OLD	Brain
GTEX.1C64O.0326.SM.73KVW	65	Muscle - Skeletal	OLD	Muscle
GTEX.1C64O.0826.SM.79OKZ	65	Heart - Left Ventricle	OLD	Heart
GTEX.1C64O.1226.SM.79OOC	65	Lung	OLD	Lung
GTEX.1C64O.2226.SM.73KTV	65	Stomach	OLD	Stomach
GTEX.1C6VQ.0326.SM.7DHMS	55	Muscle - Skeletal	OLD	Muscle
GTEX.1C6VQ.1126.SM.7EWET	55	Heart - Left Ventricle	OLD	Heart
GTEX.1C6VR.0626.SM.79OOY	65	Lung	OLD	Lung
GTEX.1C6VR.2526.SM.7DHMT	65	Muscle - Skeletal	OLD	Muscle
GTEX.1C6VR.3026.SM.7IGLW	65	Brain - Cerebellum	OLD	Brain
GTEX.1C6WA.0326.SM.7DUGE	65	Muscle - Skeletal	OLD	Muscle
GTEX.1C6WA.0726.SM.7IGQ5	65	Lung	OLD	Lung
GTEX.1C6WA.3326.SM.7MKGN	65	Brain - Cerebellum	OLD	Brain
GTEX.1CAMQ.0326.SM.7MXUI	45	Muscle - Skeletal	YOUNG	Muscle
GTEX.1CAMQ.1026.SM.7EPIC	45	Lung	YOUNG	Lung
GTEX.1CAMR.0726.SM.7EPIE	25	Stomach	YOUNG	Stomach
GTEX.1CAMR.1726.SM.793CU	25	Muscle - Skeletal	YOUNG	Muscle
GTEX.1CB4E.0526.SM.7MXTK	65	Heart - Left Ventricle	OLD	Heart
GTEX.1CB4E.1326.SM.7DUGD	65	Stomach	OLD	Stomach
GTEX.1CB4E.2126.SM.793AP	65	Muscle - Skeletal	OLD	Muscle
GTEX.1CB4F.0326.SM.9MQKD	65	Muscle - Skeletal	OLD	Muscle
GTEX.1CB4F.0926.SM.7DHMJ	65	Lung	OLD	Lung
GTEX.1CB4G.0426.SM.7MXUN	65	Muscle - Skeletal	OLD	Muscle
GTEX.1CB4G.0826.SM.7DUGF	65	Heart - Left Ventricle	OLD	Heart
GTEX.1CB4G.2926.SM.7MKFQ	65	Brain - Cerebellum	OLD	Brain
GTEX.1CB4I.0326.SM.7DHMM	55	Muscle - Skeletal	OLD	Muscle
GTEX.1CB4I.1626.SM.7RHGV	55	Heart - Left Ventricle	OLD	Heart
GTEX.1CB4I.2126.SM.793AG	55	Lung	OLD	Lung
GTEX.1CB4J.0326.SM.7PBZO	65	Heart - Left Ventricle	OLD	Heart
GTEX.1CB4J.1226.SM.7P8P3	65	Muscle - Skeletal	OLD	Muscle
GTEX.1CB4J.1726.SM.79OOL	65	Lung	OLD	Lung
GTEX.1E1VI.0426.SM.7DHN1	55	Muscle - Skeletal	OLD	Muscle
GTEX.1E1VI.0926.SM.7P8T3	55	Lung	OLD	Lung
GTEX.1E1VI.1326.SM.7IGQD	55	Heart - Left Ventricle	OLD	Heart
GTEX.1E1VI.2826.SM.7MGWU	55	Stomach	OLD	Stomach
GTEX.1E1VI.2926.SM.7IGLT	55	Brain - Cerebellum	OLD	Brain
GTEX.1E2YA.0526.SM.7P8RY	55	Muscle - Skeletal	OLD	Muscle
GTEX.1E2YA.0926.SM.7MXUK	55	Lung	OLD	Lung
GTEX.1E2YA.2426.SM.7EPIG	55	Stomach	OLD	Stomach
GTEX.1E2YA.2926.SM.7MGWX	55	Brain - Cerebellum	OLD	Brain
GTEX.1EH9U.0326.SM.7P8S2	65	Muscle - Skeletal	OLD	Muscle
GTEX.1EH9U.0826.SM.7IGPT	65	Heart - Left Ventricle	OLD	Heart
GTEX.1EH9U.2226.SM.7PBXX	65	Stomach	OLD	Stomach
GTEX.1EH9U.3126.SM.7MXU5	65	Brain - Cerebellum	OLD	Brain
GTEX.1EKGG.1126.SM.7MGXB	65	Heart - Left Ventricle	OLD	Heart
GTEX.1EKGG.1326.SM.7MXUM	65	Lung	OLD	Lung
GTEX.1EKGG.3126.SM.9WPO5	65	Brain - Cerebellum	OLD	Brain
GTEX.1EMGI.0326.SM.9MQM5	65	Muscle - Skeletal	OLD	Muscle
GTEX.1EMGI.1226.SM.793DD	65	Heart - Left Ventricle	OLD	Heart
GTEX.1EMGI.1426.SM.7IGNQ	65	Lung	OLD	Lung
GTEX.1EMGI.3126.SM.7MXUR	65	Brain - Cerebellum	OLD	Brain
GTEX.1EU9M.0126.SM.7P8P8	65	Muscle - Skeletal	OLD	Muscle
GTEX.1EU9M.1826.SM.7DUGU	65	Heart - Left Ventricle	OLD	Heart
GTEX.1EU9M.2926.SM.793DF	65	Brain - Cerebellum	OLD	Brain
GTEX.1EX96.0226.SM.7RHHR	55	Lung	OLD	Lung
GTEX.1EX96.1526.SM.7PBXK	55	Muscle - Skeletal	OLD	Muscle
GTEX.1EX96.2526.SM.7RHGW	55	Heart - Left Ventricle	OLD	Heart
GTEX.1EX96.3126.SM.9JGGC	55	Brain - Cerebellum	OLD	Brain
GTEX.1F5PK.0326.SM.9KNUD	55	Heart - Left Ventricle	OLD	Heart
GTEX.1F5PK.0526.SM.7MXUA	55	Lung	OLD	Lung
GTEX.1F5PK.1826.SM.7RHHX	55	Stomach	OLD	Stomach
GTEX.1F5PK.2626.SM.7RHH6	55	Muscle - Skeletal	OLD	Muscle
GTEX.1F6I4.0326.SM.7P8T8	65	Muscle - Skeletal	OLD	Muscle
GTEX.1F6I4.0726.SM.7PC2P	65	Heart - Left Ventricle	OLD	Heart
GTEX.1F6I4.1026.SM.7P8PS	65	Lung	OLD	Lung
GTEX.1F6I4.3026.SM.7P8SI	65	Brain - Cerebellum	OLD	Brain
GTEX.1F6IF.0226.SM.7PBZ6	65	Muscle - Skeletal	OLD	Muscle
GTEX.1F6IF.2526.SM.7P8TV	65	Heart - Left Ventricle	OLD	Heart
GTEX.1F6IF.3026.SM.7P8QN	65	Brain - Cerebellum	OLD	Brain
GTEX.1F75A.0626.SM.7PBYI	55	Muscle - Skeletal	OLD	Muscle
GTEX.1F75A.2926.SM.7MXVN	55	Brain - Cerebellum	OLD	Brain
GTEX.1F75B.0526.SM.7P8T5	55	Muscle - Skeletal	OLD	Muscle
GTEX.1F75B.1026.SM.9JGFS	55	Lung	OLD	Lung
GTEX.1F75I.0526.SM.7RHI3	45	Muscle - Skeletal	YOUNG	Muscle
GTEX.1F75I.1126.SM.9WYUO	45	Heart - Left Ventricle	YOUNG	Heart
GTEX.1F75I.1826.SM.7MKGX	45	Stomach	YOUNG	Stomach
GTEX.1F75W.0326.SM.7PC2Q	65	Muscle - Skeletal	OLD	Muscle
GTEX.1F75W.0626.SM.7PC13	65	Lung	OLD	Lung
GTEX.1F75W.3126.SM.7P8SJ	65	Brain - Cerebellum	OLD	Brain
GTEX.1FIGZ.0326.SM.7RHGT	45	Lung	YOUNG	Lung
GTEX.1FIGZ.1726.SM.9MQKS	45	Muscle - Skeletal	YOUNG	Muscle
GTEX.1GF9V.0126.SM.9WYT2	65	Muscle - Skeletal	OLD	Muscle
GTEX.1GF9V.1026.SM.9KNW3	65	Lung	OLD	Lung
GTEX.1GF9V.1626.SM.7PBXL	65	Heart - Left Ventricle	OLD	Heart
GTEX.1GF9V.3026.SM.7P8R8	65	Brain - Cerebellum	OLD	Brain
GTEX.1GF9W.0526.SM.9MQJP	65	Muscle - Skeletal	OLD	Muscle
GTEX.1GF9W.2726.SM.9JGGW	65	Brain - Cerebellum	OLD	Brain
GTEX.1GL5R.0326.SM.9WYTJ	55	Heart - Left Ventricle	OLD	Heart
GTEX.1GL5R.0526.SM.9WPOQ	55	Lung	OLD	Lung
GTEX.1GL5R.1926.SM.9WG7U	55	Stomach	OLD	Stomach
GTEX.1GMR2.0126.SM.9JGHC	55	Lung	OLD	Lung
GTEX.1GMR2.1426.SM.7RHHK	55	Heart - Left Ventricle	OLD	Heart
GTEX.1GMR2.2126.SM.7P8TX	55	Muscle - Skeletal	OLD	Muscle
GTEX.1GMR3.0226.SM.7RHIB	45	Lung	YOUNG	Lung
GTEX.1GMR3.0326.SM.7P8QT	45	Heart - Left Ventricle	YOUNG	Heart
GTEX.1GMR3.2126.SM.9WYTZ	45	Muscle - Skeletal	YOUNG	Muscle
GTEX.1GMRU.0326.SM.9WYT6	55	Muscle - Skeletal	OLD	Muscle
GTEX.1GMRU.1426.SM.9WPPL	55	Lung	OLD	Lung
GTEX.1GMRU.1526.SM.9WYT5	55	Heart - Left Ventricle	OLD	Heart
GTEX.1GMRU.2526.SM.9WG7T	55	Stomach	OLD	Stomach
GTEX.1GN1V.0326.SM.9WYTO	65	Muscle - Skeletal	OLD	Muscle
GTEX.1GN1V.0826.SM.9KNU6	65	Heart - Left Ventricle	OLD	Heart
GTEX.1GN2E.0726.SM.9MQLU	65	Muscle - Skeletal	OLD	Muscle
GTEX.1GN2E.1326.SM.9KNVG	65	Heart - Left Ventricle	OLD	Heart
GTEX.1GN2E.1526.SM.7P8TD	65	Lung	OLD	Lung
GTEX.1GN73.0126.SM.CNPPT	65	Muscle - Skeletal	OLD	Muscle
GTEX.1GN73.1026.SM.9KNV9	65	Lung	OLD	Lung
GTEX.1GN73.2426.SM.7RHFQ	65	Heart - Left Ventricle	OLD	Heart
GTEX.1GN73.3026.SM.7MXV8	65	Brain - Cerebellum	OLD	Brain
GTEX.1GPI6.0326.SM.9MQM6	65	Muscle - Skeletal	OLD	Muscle
GTEX.1GPI7.0426.SM.7RHHP	25	Muscle - Skeletal	YOUNG	Muscle
GTEX.1GPI7.1326.SM.9KNVA	25	Stomach	YOUNG	Stomach
GTEX.1GPI7.1526.SM.9JGG8	25	Lung	YOUNG	Lung
GTEX.1GTWX.0326.SM.9WYTP	65	Muscle - Skeletal	OLD	Muscle
GTEX.1GTWX.0626.SM.9WYU1	65	Lung	OLD	Lung
GTEX.1GTWX.1026.SM.7P8QW	65	Heart - Left Ventricle	OLD	Heart
GTEX.1GTWX.2926.SM.7MXV4	65	Brain - Cerebellum	OLD	Brain
GTEX.1GZ2Q.0426.SM.9WPOU	45	Muscle - Skeletal	YOUNG	Muscle
GTEX.1GZ2Q.0726.SM.9KNVV	45	Lung	YOUNG	Lung
GTEX.1GZ2Q.3026.SM.9JGG3	45	Brain - Cerebellum	YOUNG	Brain
GTEX.1GZ4I.0526.SM.9YFLX	55	Muscle - Skeletal	OLD	Muscle
GTEX.1GZ4I.0726.SM.9QEHL	55	Lung	OLD	Lung
GTEX.1GZ4I.1026.SM.9KNV5	55	Heart - Left Ventricle	OLD	Heart
GTEX.1GZ4I.2926.SM.9JGGO	55	Brain - Cerebellum	OLD	Brain
GTEX.1I6K7.0326.SM.B2LXO	45	Muscle - Skeletal	YOUNG	Muscle
GTEX.1I6K7.0626.SM.ARL7Q	45	Heart - Left Ventricle	YOUNG	Heart
GTEX.1I6K7.1226.SM.B2LVS	45	Lung	YOUNG	Lung
GTEX.1I6K7.1726.SM.B2LXQ	45	Stomach	YOUNG	Stomach
GTEX.1ICLY.0326.SM.ARL7S	55	Muscle - Skeletal	OLD	Muscle
GTEX.1ICLY.0926.SM.CM2RJ	55	Lung	OLD	Lung
GTEX.1ICLY.1326.SM.CJI47	55	Heart - Left Ventricle	OLD	Heart
GTEX.1ICLZ.0626.SM.ARL83	65	Muscle - Skeletal	OLD	Muscle
GTEX.1ICLZ.0926.SM.CKZPQ	65	Lung	OLD	Lung
GTEX.1ICLZ.1026.SM.A9SLF	65	Heart - Left Ventricle	OLD	Heart
GTEX.1IDFM.1526.SM.ARL7U	65	Muscle - Skeletal	OLD	Muscle
GTEX.1IDJC.2026.SM.ADEIK	55	Muscle - Skeletal	OLD	Muscle
GTEX.1IDJD.1326.SM.CM2TQ	35	Muscle - Skeletal	YOUNG	Muscle
GTEX.1IDJD.2426.SM.C1YS6	35	Stomach	YOUNG	Stomach
GTEX.1IDJF.0326.SM.ADEIG	25	Muscle - Skeletal	YOUNG	Muscle
GTEX.1IDJF.0726.SM.CJI1U	25	Heart - Left Ventricle	YOUNG	Heart
GTEX.1IDJF.1426.SM.ACKWK	25	Stomach	YOUNG	Stomach
GTEX.1JJ6O.0926.SM.CYPT1	65	Muscle - Skeletal	OLD	Muscle
GTEX.1JJ6O.2126.SM.CNNP6	65	Heart - Left Ventricle	OLD	Heart
GTEX.1JJ6O.3026.SM.C1YQH	65	Brain - Cerebellum	OLD	Brain
GTEX.1JKYN.1726.SM.AHZ48	35	Stomach	YOUNG	Stomach
GTEX.1JKYN.1826.SM.ARZMZ	35	Muscle - Skeletal	YOUNG	Muscle
GTEX.1JKYN.2126.SM.ARU8W	35	Lung	YOUNG	Lung
GTEX.1JKYR.0326.SM.CNPOL	25	Muscle - Skeletal	YOUNG	Muscle
GTEX.1JMLX.0326.SM.CM2RP	55	Muscle - Skeletal	OLD	Muscle
GTEX.1JMLX.0926.SM.CNNPQ	55	Lung	OLD	Lung
GTEX.1JMLX.1626.SM.ARZMV	55	Heart - Left Ventricle	OLD	Heart
GTEX.1JMLX.2426.SM.CXZJQ	55	Stomach	OLD	Stomach
GTEX.1JMLX.3026.SM.EV79Q	55	Brain - Cerebellum	OLD	Brain
GTEX.1JMPY.0926.SM.ARL92	35	Stomach	YOUNG	Stomach
GTEX.1JMPY.1226.SM.CJI3A	35	Muscle - Skeletal	YOUNG	Muscle
GTEX.1JMPZ.0126.SM.CNPOZ	35	Muscle - Skeletal	YOUNG	Muscle
GTEX.1JMPZ.1126.SM.ARU8X	35	Lung	YOUNG	Lung
GTEX.1JMPZ.1426.SM.CJI3C	35	Heart - Left Ventricle	YOUNG	Heart
GTEX.1JMPZ.1826.SM.CXZJT	35	Stomach	YOUNG	Stomach
GTEX.1JMPZ.2826.SM.C1YRA	35	Brain - Cerebellum	YOUNG	Brain
GTEX.1JMQI.1126.SM.ARZN2	55	Lung	OLD	Lung
GTEX.1JMQI.2126.SM.CM2SC	55	Muscle - Skeletal	OLD	Muscle
GTEX.1JMQJ.0126.SM.E6CI2	55	Muscle - Skeletal	OLD	Muscle
GTEX.1JMQJ.1326.SM.D4P3B	55	Stomach	OLD	Stomach
GTEX.1JMQJ.2126.SM.CNPPA	55	Lung	OLD	Lung
GTEX.1JMQJ.3126.SM.EV79G	55	Brain - Cerebellum	OLD	Brain
GTEX.1JMQK.0326.SM.ARZN5	65	Muscle - Skeletal	OLD	Muscle
GTEX.1JMQK.0626.SM.D4P2R	65	Heart - Left Ventricle	OLD	Heart
GTEX.1JMQK.2926.SM.D4P2T	65	Brain - Cerebellum	OLD	Brain
GTEX.1JN6P.0526.SM.COH33	65	Muscle - Skeletal	OLD	Muscle
GTEX.1JN6P.0726.SM.ARZN7	65	Lung	OLD	Lung
GTEX.1JN6P.1126.SM.CKZON	65	Heart - Left Ventricle	OLD	Heart
GTEX.1K2DA.0826.SM.CGQGD	55	Stomach	OLD	Stomach
GTEX.1K2DA.2226.SM.CGQGM	55	Muscle - Skeletal	OLD	Muscle
GTEX.1K2DU.0526.SM.D4P2Y	25	Lung	YOUNG	Lung
GTEX.1K2DU.2526.SM.D3L8V	25	Muscle - Skeletal	YOUNG	Muscle
GTEX.1KAFJ.0326.SM.DHXJG	55	Lung	OLD	Lung
GTEX.1KAFJ.2326.SM.D3L8Z	55	Muscle - Skeletal	OLD	Muscle
GTEX.1KANA.0926.SM.D3L9K	25	Muscle - Skeletal	YOUNG	Muscle
GTEX.1KANA.1126.SM.D3L9M	25	Stomach	YOUNG	Stomach
GTEX.1KANB.0126.SM.E6CJT	55	Muscle - Skeletal	OLD	Muscle
GTEX.1KANB.1026.SM.D3L9F	55	Lung	OLD	Lung
GTEX.1KANB.3226.SM.D4P3G	55	Brain - Cerebellum	OLD	Brain
GTEX.1KD4Q.0326.SM.E9TJA	45	Muscle - Skeletal	YOUNG	Muscle
GTEX.1KD4Q.0726.SM.DIPGE	45	Heart - Left Ventricle	YOUNG	Heart
GTEX.1KD4Q.0926.SM.CXZKI	45	Lung	YOUNG	Lung
GTEX.1KD4Q.3026.SM.EV7A7	45	Brain - Cerebellum	YOUNG	Brain
GTEX.1KD5A.0726.SM.DIPEO	55	Muscle - Skeletal	OLD	Muscle
GTEX.1KD5A.1026.SM.CY8I8	55	Heart - Left Ventricle	OLD	Heart
GTEX.1KD5A.1126.SM.CXZK6	55	Lung	OLD	Lung
GTEX.1KD5A.1426.SM.D4P3V	55	Stomach	OLD	Stomach
GTEX.1KWVE.0426.SM.DHXJX	35	Lung	YOUNG	Lung
GTEX.1KWVE.0926.SM.CXZKP	35	Muscle - Skeletal	YOUNG	Muscle
GTEX.1KWVE.2226.SM.CXZKN	35	Brain - Cerebellum	YOUNG	Brain
GTEX.1KXAM.0426.SM.DHXKG	65	Lung	OLD	Lung
GTEX.1KXAM.0926.SM.CXZKA	65	Stomach	OLD	Stomach
GTEX.1KXAM.1326.SM.E9TJW	65	Heart - Left Ventricle	OLD	Heart
GTEX.1KXAM.2426.SM.DIPFC	65	Muscle - Skeletal	OLD	Muscle
GTEX.1L5NE.0426.SM.E9TIX	55	Heart - Left Ventricle	OLD	Heart
GTEX.1L5NE.0726.SM.CXZKQ	55	Lung	OLD	Lung
GTEX.1L5NE.1526.SM.DIPFW	55	Stomach	OLD	Stomach
GTEX.1L5NE.2226.SM.CXZKS	55	Muscle - Skeletal	OLD	Muscle
GTEX.1LB8K.0126.SM.EVYCN	55	Muscle - Skeletal	OLD	Muscle
GTEX.1LB8K.0826.SM.D4P41	55	Lung	OLD	Lung
GTEX.1LB8K.1026.SM.DHXJJ	55	Heart - Left Ventricle	OLD	Heart
GTEX.1LBAC.0326.SM.DIPF1	25	Muscle - Skeletal	YOUNG	Muscle
GTEX.1LBAC.1426.SM.CXZKT	25	Stomach	YOUNG	Stomach
GTEX.1LC47.0626.SM.DIPFE	65	Muscle - Skeletal	OLD	Muscle
GTEX.1LC47.1026.SM.D3LAH	65	Heart - Left Ventricle	OLD	Heart
GTEX.1LC47.1126.SM.D4P43	65	Lung	OLD	Lung
GTEX.1LG7Y.0126.SM.E6CJ8	55	Muscle - Skeletal	OLD	Muscle
GTEX.1LG7Y.0826.SM.E9TJX	55	Lung	OLD	Lung
GTEX.1LG7Y.1226.SM.CXZKD	55	Heart - Left Ventricle	OLD	Heart
GTEX.1LG7Y.3126.SM.EV7AS	55	Brain - Cerebellum	OLD	Brain
GTEX.1LG7Z.1226.SM.DHXK4	35	Stomach	YOUNG	Stomach
GTEX.1LG7Z.2126.SM.CXKYU	35	Muscle - Skeletal	YOUNG	Muscle
GTEX.1LSNL.0126.SM.EWRNR	55	Muscle - Skeletal	OLD	Muscle
GTEX.1LSNM.0526.SM.DIPG6	55	Heart - Left Ventricle	OLD	Heart
GTEX.1LSNM.1026.SM.DHXL2	55	Stomach	OLD	Stomach
GTEX.1LSNM.2326.SM.EWRO8	55	Muscle - Skeletal	OLD	Muscle
GTEX.1LSVX.0626.SM.E9U59	65	Lung	OLD	Lung
GTEX.1LSVX.2826.SM.EVR58	65	Brain - Cerebellum	OLD	Brain
GTEX.1LVA9.0326.SM.DLHBU	55	Muscle - Skeletal	OLD	Muscle
GTEX.1LVA9.0926.SM.EVR5G	55	Heart - Left Ventricle	OLD	Heart
GTEX.1LVAO.0526.SM.EWRNS	65	Muscle - Skeletal	OLD	Muscle
GTEX.1LVAO.1226.SM.DIPGB	65	Lung	OLD	Lung
GTEX.1M4P7.0126.SM.DKPQF	65	Muscle - Skeletal	OLD	Muscle
GTEX.1M4P7.0826.SM.E9TJR	65	Lung	OLD	Lung
GTEX.1M5QR.1026.SM.DHXK9	45	Heart - Left Ventricle	YOUNG	Heart
GTEX.1M5QR.1326.SM.EWROC	45	Muscle - Skeletal	YOUNG	Muscle
GTEX.1MA7X.0626.SM.E9TJI	65	Lung	OLD	Lung
GTEX.1MCQQ.0626.SM.E9U5Q	65	Muscle - Skeletal	OLD	Muscle
GTEX.1MGNQ.0826.SM.EVR41	45	Lung	YOUNG	Lung
GTEX.1MGNQ.1826.SM.DPRYI	45	Stomach	YOUNG	Stomach
GTEX.1MJIX.0326.SM.EVR42	45	Heart - Left Ventricle	YOUNG	Heart
GTEX.1MJIX.0626.SM.DTX8V	45	Lung	YOUNG	Lung
GTEX.1MJIX.1126.SM.EV7AO	45	Stomach	YOUNG	Stomach
GTEX.1MJIX.2126.SM.E9J3A	45	Muscle - Skeletal	YOUNG	Muscle
GTEX.1MJK2.1126.SM.E9TJ7	55	Lung	OLD	Lung
GTEX.1MJK2.3026.SM.EV7A5	55	Brain - Cerebellum	OLD	Brain
GTEX.1MJK3.1426.SM.E9TK1	25	Muscle - Skeletal	YOUNG	Muscle
GTEX.1MUQO.0226.SM.E9TJL	65	Muscle - Skeletal	OLD	Muscle
GTEX.1MUQO.1226.SM.E9TJK	65	Heart - Left Ventricle	OLD	Heart
GTEX.1MUQO.1926.SM.EAZ59	65	Stomach	OLD	Stomach
GTEX.1N2DV.0526.SM.DTX8W	45	Muscle - Skeletal	YOUNG	Muscle
GTEX.1N2DV.0926.SM.E9TJT	45	Stomach	YOUNG	Stomach
GTEX.1N2DW.0426.SM.E9TK4	55	Muscle - Skeletal	OLD	Muscle
GTEX.1N2DW.1126.SM.EVR59	55	Lung	OLD	Lung
GTEX.1N2EF.0526.SM.E76OK	65	Muscle - Skeletal	OLD	Muscle
GTEX.1N2EF.2826.SM.E6CQF	65	Heart - Left Ventricle	OLD	Heart
GTEX.1NHNU.1226.SM.DTX8I	55	Muscle - Skeletal	OLD	Muscle
GTEX.1NSGN.1626.SM.EXOJF	55	Lung	OLD	Lung
GTEX.1NSGN.1926.SM.E9J36	55	Stomach	OLD	Stomach
GTEX.1NV8Z.1526.SM.DTX8X	65	Heart - Left Ventricle	OLD	Heart
GTEX.1NV8Z.3026.SM.DTX8Z	65	Brain - Cerebellum	OLD	Brain
GTEX.1O97I.0826.SM.E8VNE	65	Heart - Left Ventricle	OLD	Heart
GTEX.1O9I2.0526.SM.EYYXI	55	Muscle - Skeletal	OLD	Muscle
GTEX.1O9I2.1126.SM.DTXEA	55	Heart - Left Ventricle	OLD	Heart
GTEX.1OFPY.1026.SM.EXUSO	65	Heart - Left Ventricle	OLD	Heart
GTEX.1OFPY.2526.SM.DTXEK	65	Muscle - Skeletal	OLD	Muscle
GTEX.1OJC3.0726.SM.DTX92	25	Lung	YOUNG	Lung
GTEX.1OKEX.0726.SM.DPRYE	65	Heart - Left Ventricle	OLD	Heart
GTEX.1P4AB.0326.SM.EXUT3	55	Muscle - Skeletal	OLD	Muscle
GTEX.1P4AB.1026.SM.DTXES	55	Lung	OLD	Lung
GTEX.1P4AB.3026.SM.EXOJS	55	Brain - Cerebellum	OLD	Brain
GTEX.1PBJJ.0326.SM.E8VNT	35	Muscle - Skeletal	YOUNG	Muscle
GTEX.1PDJ9.0526.SM.DTXDL	25	Muscle - Skeletal	YOUNG	Muscle
GTEX.1PIGE.0226.SM.E76OT	25	Muscle - Skeletal	YOUNG	Muscle
GTEX.1PIGE.1126.SM.EWRMV	25	Stomach	YOUNG	Stomach
GTEX.1PIIG.0126.SM.E9J46	35	Muscle - Skeletal	YOUNG	Muscle
GTEX.1PIIG.1826.SM.DTX7N	35	Lung	YOUNG	Lung
GTEX.1PIIG.2826.SM.DTX7O	35	Brain - Cerebellum	YOUNG	Brain
GTEX.1PPGY.0426.SM.DTXFE	65	Muscle - Skeletal	OLD	Muscle
GTEX.1PPGY.1126.SM.E76OU	65	Heart - Left Ventricle	OLD	Heart
GTEX.1PPGY.1826.SM.EXOJ8	65	Lung	OLD	Lung
GTEX.1PPH7.0226.SM.E76Q1	45	Lung	YOUNG	Lung
GTEX.1PPH7.2026.SM.E9J3N	45	Heart - Left Ventricle	YOUNG	Heart
GTEX.1PPH7.2526.SM.E76OJ	45	Muscle - Skeletal	YOUNG	Muscle
GTEX.1PPH8.0326.SM.E76PR	25	Muscle - Skeletal	YOUNG	Muscle
GTEX.1PPH8.1326.SM.DTXFO	25	Stomach	YOUNG	Stomach
GTEX.1PWST.0426.SM.E76QV	75	Muscle - Skeletal	OLD	Muscle
GTEX.1PWST.0826.SM.DTXF1	75	Lung	OLD	Lung
GTEX.1PWST.1026.SM.DTXF2	75	Heart - Left Ventricle	OLD	Heart
GTEX.1PWST.3026.SM.EAZ3H	75	Brain - Cerebellum	OLD	Brain
GTEX.1QAET.0426.SM.EXUSM	55	Lung	OLD	Lung
GTEX.1QAET.2026.SM.E9J3S	55	Muscle - Skeletal	OLD	Muscle
GTEX.1QCLY.0426.SM.E8VOH	35	Muscle - Skeletal	YOUNG	Muscle
GTEX.1QCLY.1026.SM.EWRNI	35	Lung	YOUNG	Lung
GTEX.1QCLY.1126.SM.EAZ4J	35	Stomach	YOUNG	Stomach
GTEX.1QMI2.0526.SM.DTXFU	65	Muscle - Skeletal	OLD	Muscle
GTEX.1QMI2.0926.SM.DTX7S	65	Lung	OLD	Lung
GTEX.1QMI2.2126.SM.DPRXQ	65	Stomach	OLD	Stomach
GTEX.1QP29.1226.SM.E6CQ1	55	Lung	OLD	Lung
GTEX.1QP29.1526.SM.EXUSY	55	Heart - Left Ventricle	OLD	Heart
GTEX.1QP29.2326.SM.EXOJO	55	Stomach	OLD	Stomach
GTEX.1QP2A.0526.SM.E8VN5	55	Muscle - Skeletal	OLD	Muscle
GTEX.1QP2A.1126.SM.EVR3H	55	Heart - Left Ventricle	OLD	Heart
GTEX.1QP2A.1226.SM.EVR3I	55	Lung	OLD	Lung
GTEX.1QP2A.2126.SM.DPRZ7	55	Stomach	OLD	Stomach
GTEX.1QP66.1626.SM.E76PC	55	Muscle - Skeletal	OLD	Muscle
GTEX.1QP6S.0426.SM.DTXG4	45	Muscle - Skeletal	YOUNG	Muscle
GTEX.1QP6S.3026.SM.EAZ4N	45	Brain - Cerebellum	YOUNG	Brain
GTEX.1QP9N.1926.SM.E6CPY	35	Muscle - Skeletal	YOUNG	Muscle
GTEX.1QW4Y.0726.SM.DTX8E	35	Stomach	YOUNG	Stomach
GTEX.1QW4Y.1726.SM.EWRN1	35	Muscle - Skeletal	YOUNG	Muscle
GTEX.1R7EU.0626.SM.DTX9N	65	Muscle - Skeletal	OLD	Muscle
GTEX.1R7EU.1126.SM.EAZ4M	65	Stomach	OLD	Stomach
GTEX.1R7EV.0326.SM.E76PA	45	Heart - Left Ventricle	YOUNG	Heart
GTEX.1R7EV.2026.SM.DTX83	45	Muscle - Skeletal	YOUNG	Muscle
GTEX.1R9K4.0626.SM.E76OZ	65	Muscle - Skeletal	OLD	Muscle
GTEX.1R9K4.1326.SM.DTX8G	65	Heart - Left Ventricle	OLD	Heart
GTEX.1R9K5.0326.SM.EWRNG	55	Muscle - Skeletal	OLD	Muscle
GTEX.1R9K5.1026.SM.EAZ4F	55	Stomach	OLD	Stomach
GTEX.1R9K5.1326.SM.E6CPR	55	Heart - Left Ventricle	OLD	Heart
GTEX.1R9PM.0426.SM.EVR3P	25	Lung	YOUNG	Lung
GTEX.1R9PM.2226.SM.E8VOC	25	Muscle - Skeletal	YOUNG	Muscle
GTEX.1RAZA.0526.SM.E76R2	25	Muscle - Skeletal	YOUNG	Muscle
GTEX.1RAZQ.0426.SM.DTXFQ	35	Muscle - Skeletal	YOUNG	Muscle
GTEX.1RAZQ.1026.SM.EAZ4R	35	Lung	YOUNG	Lung
GTEX.1RAZR.0326.SM.EWRNM	45	Muscle - Skeletal	YOUNG	Muscle
GTEX.1RAZR.0726.SM.EV7BA	45	Lung	YOUNG	Lung
GTEX.1RAZR.1526.SM.EAZ4U	45	Stomach	YOUNG	Stomach
GTEX.1RB15.0326.SM.E6CQB	65	Heart - Left Ventricle	OLD	Heart
GTEX.1RB15.1026.SM.E9U6V	65	Stomach	OLD	Stomach
GTEX.1RB15.2226.SM.DTXFZ	65	Muscle - Skeletal	OLD	Muscle
GTEX.1RLM8.0626.SM.E76OW	55	Lung	OLD	Lung
GTEX.1RMOY.0626.SM.E9TIE	55	Heart - Left Ventricle	OLD	Heart
GTEX.1RMOY.1126.SM.EV79E	55	Stomach	OLD	Stomach
GTEX.1RNSC.1226.SM.E9U52	65	Lung	OLD	Lung
GTEX.1RNSC.3126.SM.EVR4V	65	Brain - Cerebellum	OLD	Brain
GTEX.1RQEC.0126.SM.E9J2H	65	Muscle - Skeletal	OLD	Muscle
GTEX.1RQEC.0926.SM.EWROG	65	Heart - Left Ventricle	OLD	Heart
GTEX.1RQEC.2126.SM.DPS15	65	Stomach	OLD	Stomach
GTEX.1RQEC.3026.SM.DPRXM	65	Brain - Cerebellum	OLD	Brain
GTEX.1RQED.0426.SM.E6CJP	65	Muscle - Skeletal	OLD	Muscle
GTEX.1RQED.1026.SM.EVYCT	65	Lung	OLD	Lung
GTEX.1S3DN.0726.SM.E9TIO	55	Heart - Left Ventricle	OLD	Heart
GTEX.1S3DN.1526.SM.EVYCB	55	Stomach	OLD	Stomach
GTEX.1S5VW.0526.SM.E6CHL	65	Muscle - Skeletal	OLD	Muscle
GTEX.1S5VW.0926.SM.EWRNU	65	Lung	OLD	Lung
GTEX.1S5ZA.0526.SM.EWRO1	25	Muscle - Skeletal	YOUNG	Muscle
GTEX.1S82Y.2226.SM.EWRNV	45	Muscle - Skeletal	YOUNG	Muscle
GTEX.1S831.1126.SM.EWROI	25	Stomach	YOUNG	Stomach
GTEX.1S83E.2126.SM.EWRO6	45	Muscle - Skeletal	YOUNG	Muscle
GTEX.N7MS.0426.SM.2YUN6	65	Muscle - Skeletal	OLD	Muscle
GTEX.N7MS.0826.SM.2HML4	65	Heart - Left Ventricle	OLD	Heart
GTEX.N7MS.0926.SM.2HMIZ	65	Lung	OLD	Lung
GTEX.N7MS.2526.SM.2D7W3	65	Brain - Cerebellum	OLD	Brain
GTEX.NFK9.0626.SM.2HMIV	45	Muscle - Skeletal	YOUNG	Muscle
GTEX.NFK9.0926.SM.2HMJU	45	Heart - Left Ventricle	YOUNG	Heart
GTEX.NFK9.1026.SM.2HMK1	45	Lung	YOUNG	Lung
GTEX.NFK9.1526.SM.3LK7B	45	Stomach	YOUNG	Stomach
GTEX.NPJ8.0326.SM.2D7VV	45	Lung	YOUNG	Lung
GTEX.NPJ8.0426.SM.2HMK6	45	Heart - Left Ventricle	YOUNG	Heart
GTEX.NPJ8.2626.SM.2D7W2	45	Brain - Cerebellum	YOUNG	Brain
GTEX.O5YT.0326.SM.32PKA	25	Heart - Left Ventricle	YOUNG	Heart
GTEX.O5YT.0526.SM.32PK8	25	Lung	YOUNG	Lung
GTEX.O5YT.1626.SM.32PK6	25	Muscle - Skeletal	YOUNG	Muscle
GTEX.O5YW.0326.SM.2I5EI	55	Heart - Left Ventricle	OLD	Heart
GTEX.O5YW.0526.SM.2YUMX	55	Lung	OLD	Lung
GTEX.O5YW.1526.SM.3MJGL	55	Stomach	OLD	Stomach
GTEX.OHPM.0326.SM.33HCA	55	Heart - Left Ventricle	OLD	Heart
GTEX.OHPM.0526.SM.2YUMJ	55	Lung	OLD	Lung
GTEX.OHPM.1526.SM.EV796	55	Stomach	OLD	Stomach
GTEX.OIZF.0326.SM.3MJGY	65	Heart - Left Ventricle	OLD	Heart
GTEX.OIZF.0526.SM.7MXVM	65	Lung	OLD	Lung
GTEX.OIZF.1526.SM.2I5GR	65	Stomach	OLD	Stomach
GTEX.OIZF.1626.SM.2YUNE	65	Muscle - Skeletal	OLD	Muscle
GTEX.OIZG.0526.SM.2HMLF	55	Lung	OLD	Lung
GTEX.OIZG.1126.SM.2HMIU	55	Heart - Left Ventricle	OLD	Heart
GTEX.OIZG.1326.SM.2HMIQ	55	Muscle - Skeletal	OLD	Muscle
GTEX.OIZH.0326.SM.2HMKC	55	Heart - Left Ventricle	OLD	Heart
GTEX.OIZH.0526.SM.2HMKV	55	Lung	OLD	Lung
GTEX.OIZH.1526.SM.3NB1J	55	Stomach	OLD	Stomach
GTEX.OIZH.1626.SM.2HMKI	55	Muscle - Skeletal	OLD	Muscle
GTEX.OIZI.0626.SM.2XCEH	45	Muscle - Skeletal	YOUNG	Muscle
GTEX.OIZI.0926.SM.E6CHF	45	Heart - Left Ventricle	YOUNG	Heart
GTEX.OIZI.1026.SM.3NB1K	45	Lung	YOUNG	Lung
GTEX.OOBJ.0326.SM.33HBO	65	Heart - Left Ventricle	OLD	Heart
GTEX.OOBJ.0526.SM.48TDK	65	Lung	OLD	Lung
GTEX.OOBJ.1526.SM.3NB1Q	65	Stomach	OLD	Stomach
GTEX.OOBJ.1626.SM.2I3F7	65	Muscle - Skeletal	OLD	Muscle
GTEX.OOBK.0526.SM.2HMJJ	45	Lung	YOUNG	Lung
GTEX.OOBK.1626.SM.2HMKG	45	Muscle - Skeletal	YOUNG	Muscle
GTEX.OXRL.0326.SM.2I3F2	55	Heart - Left Ventricle	OLD	Heart
GTEX.OXRL.0526.SM.2I3EZ	55	Lung	OLD	Lung
GTEX.OXRL.1526.SM.E6CHQ	55	Stomach	OLD	Stomach
GTEX.OXRL.1626.SM.2YUMU	55	Muscle - Skeletal	OLD	Muscle
GTEX.OXRN.0526.SM.2I5EN	55	Lung	OLD	Lung
GTEX.OXRN.1326.SM.3LK5V	55	Muscle - Skeletal	OLD	Muscle
GTEX.P44G.0526.SM.2XCD1	35	Muscle - Skeletal	YOUNG	Muscle
GTEX.P44G.0826.SM.2I5ES	35	Heart - Left Ventricle	YOUNG	Heart
GTEX.P44G.2526.SM.2I5EK	35	Brain - Cerebellum	YOUNG	Brain
GTEX.P44H.0426.SM.2XCEZ	45	Muscle - Skeletal	YOUNG	Muscle
GTEX.P44H.0726.SM.48TBT	45	Heart - Left Ventricle	YOUNG	Heart
GTEX.P44H.1126.SM.48TBU	45	Lung	YOUNG	Lung
GTEX.P44H.2426.SM.2XCEJ	45	Brain - Cerebellum	YOUNG	Brain
GTEX.P4PQ.0326.SM.2HMJ8	65	Heart - Left Ventricle	OLD	Heart
GTEX.P4PQ.0526.SM.2HMKR	65	Lung	OLD	Lung
GTEX.P4PQ.1526.SM.3NMCK	65	Stomach	OLD	Stomach
GTEX.P4PQ.1626.SM.2HMKK	65	Muscle - Skeletal	OLD	Muscle
GTEX.P4QS.0326.SM.2I3EU	65	Heart - Left Ventricle	OLD	Heart
GTEX.P4QS.0526.SM.2I3ET	65	Lung	OLD	Lung
GTEX.P4QS.1626.SM.2S1NH	65	Muscle - Skeletal	OLD	Muscle
GTEX.PLZ5.0626.SM.2I5F8	55	Heart - Left Ventricle	OLD	Heart
GTEX.PLZ5.0726.SM.2I5F9	55	Lung	OLD	Lung
GTEX.PLZ5.1226.SM.EXOHA	55	Stomach	OLD	Stomach
GTEX.PLZ5.1726.SM.2I5F6	55	Muscle - Skeletal	OLD	Muscle
GTEX.PLZ6.0426.SM.5IJDW	35	Lung	YOUNG	Lung
GTEX.PLZ6.0826.SM.3P61K	35	Stomach	YOUNG	Stomach
GTEX.PLZ6.1526.SM.2S1OC	35	Muscle - Skeletal	YOUNG	Muscle
GTEX.POYW.0526.SM.2XCEY	65	Muscle - Skeletal	OLD	Muscle
GTEX.POYW.1226.SM.2XCEP	65	Lung	OLD	Lung
GTEX.PSDG.0426.SM.5SI86	55	Muscle - Skeletal	OLD	Muscle
GTEX.PSDG.0926.SM.2I5FP	55	Heart - Left Ventricle	OLD	Heart
GTEX.PSDG.1126.SM.2S1ON	55	Lung	OLD	Lung
GTEX.PVOW.0426.SM.5MR5R	45	Heart - Left Ventricle	YOUNG	Heart
GTEX.PVOW.1026.SM.2XCF9	45	Lung	YOUNG	Lung
GTEX.PVOW.2626.SM.32PL8	45	Brain - Cerebellum	YOUNG	Brain
GTEX.PW2O.0526.SM.2I3DX	25	Lung	YOUNG	Lung
GTEX.PW2O.1226.SM.48TCH	25	Stomach	YOUNG	Stomach
GTEX.PW2O.1726.SM.2S1OO	25	Muscle - Skeletal	YOUNG	Muscle
GTEX.Q2AH.0426.SM.2I3EP	45	Lung	YOUNG	Lung
GTEX.Q2AH.0526.SM.2I3ED	45	Heart - Left Ventricle	YOUNG	Heart
GTEX.Q2AH.1126.SM.48TZM	45	Stomach	YOUNG	Stomach
GTEX.Q2AH.1826.SM.2S1Q2	45	Muscle - Skeletal	YOUNG	Muscle
GTEX.Q2AI.0826.SM.48TZO	45	Stomach	YOUNG	Stomach
GTEX.Q2AI.1526.SM.3GIJ3	45	Muscle - Skeletal	YOUNG	Muscle
GTEX.QDVJ.0426.SM.2I5FW	55	Heart - Left Ventricle	OLD	Heart
GTEX.QDVJ.0926.SM.2I5FU	55	Lung	OLD	Lung
GTEX.QDVJ.1426.SM.48U1Y	55	Stomach	OLD	Stomach
GTEX.QDVJ.1926.SM.2S1PJ	55	Muscle - Skeletal	OLD	Muscle
GTEX.QDVN.0326.SM.2I3FS	55	Heart - Left Ventricle	OLD	Heart
GTEX.QDVN.0726.SM.4B64L	55	Lung	OLD	Lung
GTEX.QDVN.1226.SM.48TZ5	55	Stomach	OLD	Stomach
GTEX.QDVN.2426.SM.2S1Q4	55	Muscle - Skeletal	OLD	Muscle
GTEX.QEG4.0426.SM.33HC3	35	Heart - Left Ventricle	YOUNG	Heart
GTEX.QEG4.0526.SM.48TZD	35	Lung	YOUNG	Lung
GTEX.QEG4.0626.SM.2S1OY	35	Muscle - Skeletal	YOUNG	Muscle
GTEX.QEG5.0426.SM.2I5GJ	25	Muscle - Skeletal	YOUNG	Muscle
GTEX.QEG5.0926.SM.2TC64	25	Heart - Left Ventricle	YOUNG	Heart
GTEX.QEG5.1126.SM.33HC2	25	Lung	YOUNG	Lung
GTEX.QEL4.0626.SM.3GIJM	55	Muscle - Skeletal	OLD	Muscle
GTEX.QEL4.0826.SM.3GAF2	55	Lung	OLD	Lung
GTEX.QEL4.0926.SM.3GAD1	55	Heart - Left Ventricle	OLD	Heart
GTEX.QESD.0526.SM.2I5G5	25	Heart - Left Ventricle	YOUNG	Heart
GTEX.QESD.0626.SM.2I5G4	25	Lung	YOUNG	Lung
GTEX.QESD.1626.SM.2S1RB	25	Muscle - Skeletal	YOUNG	Muscle
GTEX.QLQ7.0526.SM.2I5G3	65	Heart - Left Ventricle	OLD	Heart
GTEX.QLQ7.0826.SM.447B3	65	Stomach	OLD	Stomach
GTEX.QLQ7.1726.SM.2S1QQ	65	Muscle - Skeletal	OLD	Muscle
GTEX.QMR6.1326.SM.32PLB	55	Brain - Cerebellum	OLD	Brain
GTEX.QMR6.1926.SM.32PL9	55	Lung	OLD	Lung
GTEX.QMRM.0526.SM.2I5GA	55	Heart - Left Ventricle	OLD	Heart
GTEX.QMRM.0826.SM.3NB33	55	Lung	OLD	Lung
GTEX.QMRM.1126.SM.447BN	55	Stomach	OLD	Stomach
GTEX.QV31.0626.SM.447C5	35	Stomach	YOUNG	Stomach
GTEX.QV31.1426.SM.2S1QD	35	Muscle - Skeletal	YOUNG	Muscle
GTEX.QV44.0526.SM.2S1RE	55	Heart - Left Ventricle	OLD	Heart
GTEX.QV44.0926.SM.2S1RH	55	Lung	OLD	Lung
GTEX.QV44.1226.SM.CJI1S	55	Stomach	OLD	Stomach
GTEX.QV44.2026.SM.2S1RD	55	Muscle - Skeletal	OLD	Muscle
GTEX.QXCU.0626.SM.2TC69	55	Lung	OLD	Lung
GTEX.QXCU.1726.SM.2TC6L	55	Muscle - Skeletal	OLD	Muscle
GTEX.QXCU.1926.SM.48FE4	55	Stomach	OLD	Stomach
GTEX.R55C.0326.SM.3GAF1	45	Heart - Left Ventricle	YOUNG	Heart
GTEX.R55C.0526.SM.3GIKA	45	Lung	YOUNG	Lung
GTEX.R55C.1026.SM.48FCM	45	Stomach	YOUNG	Stomach
GTEX.R55C.1726.SM.3GADJ	45	Muscle - Skeletal	YOUNG	Muscle
GTEX.R55D.0626.SM.3GAD5	55	Muscle - Skeletal	OLD	Muscle
GTEX.R55D.0926.SM.3GAEU	55	Lung	OLD	Lung
GTEX.R55D.1526.SM.48FEJ	55	Stomach	OLD	Stomach
GTEX.R55E.0526.SM.2TC6B	25	Muscle - Skeletal	YOUNG	Muscle
GTEX.R55E.1026.SM.2TC5S	25	Heart - Left Ventricle	YOUNG	Heart
GTEX.R55E.2526.SM.2TC6H	25	Brain - Cerebellum	YOUNG	Brain
GTEX.REY6.0426.SM.2TF5G	65	Lung	OLD	Lung
GTEX.REY6.0826.SM.2TF4S	65	Muscle - Skeletal	OLD	Muscle
GTEX.REY6.1026.SM.2TF4Y	65	Heart - Left Ventricle	OLD	Heart
GTEX.RM2N.0426.SM.2TF4T	55	Lung	OLD	Lung
GTEX.RM2N.0826.SM.48FD3	55	Stomach	OLD	Stomach
GTEX.RM2N.1626.SM.2TF5N	55	Muscle - Skeletal	OLD	Muscle
GTEX.RN64.0326.SM.2TC5J	55	Muscle - Skeletal	OLD	Muscle
GTEX.RN64.0826.SM.2TC62	55	Heart - Left Ventricle	OLD	Heart
GTEX.RN64.1226.SM.2TC6E	55	Lung	OLD	Lung
GTEX.RUSQ.0526.SM.2TF72	55	Heart - Left Ventricle	OLD	Heart
GTEX.RUSQ.0626.SM.2TF5V	55	Lung	OLD	Lung
GTEX.RUSQ.1126.SM.EAZAU	55	Stomach	OLD	Stomach
GTEX.RUSQ.1726.SM.2TF68	55	Muscle - Skeletal	OLD	Muscle
GTEX.RVPV.1726.SM.2NKAQ	65	Lung	OLD	Lung
GTEX.RWSA.0626.SM.2XCBD	45	Heart - Left Ventricle	YOUNG	Heart
GTEX.RWSA.0726.SM.2XCBE	45	Muscle - Skeletal	YOUNG	Muscle
GTEX.RWSA.1126.SM.2XCAZ	45	Lung	YOUNG	Lung
GTEX.S33H.0526.SM.COH1W	35	Heart - Left Ventricle	YOUNG	Heart
GTEX.S33H.0626.SM.2XCBJ	35	Lung	YOUNG	Lung
GTEX.S33H.2226.SM.DKPOP	35	Muscle - Skeletal	YOUNG	Muscle
GTEX.S3LF.1126.SM.EVR33	75	Lung	OLD	Lung
GTEX.S3XE.1026.SM.4AD4O	55	Stomach	OLD	Stomach
GTEX.S4Q7.0726.SM.4AD5F	25	Stomach	YOUNG	Stomach
GTEX.S4Z8.1226.SM.4AD6W	65	Stomach	OLD	Stomach
GTEX.S7PM.0526.SM.3NM92	65	Muscle - Skeletal	OLD	Muscle
GTEX.S7SE.0926.SM.2XCD6	55	Lung	OLD	Lung
GTEX.S7SE.2526.SM.2XCDL	55	Brain - Cerebellum	OLD	Brain
GTEX.S95S.0826.SM.4B64N	65	Stomach	OLD	Stomach
GTEX.S95S.1426.SM.2XCDM	65	Muscle - Skeletal	OLD	Muscle
GTEX.SIU8.0526.SM.2XCDP	55	Muscle - Skeletal	OLD	Muscle
GTEX.SIU8.0826.SM.2XCDQ	55	Heart - Left Ventricle	OLD	Heart
GTEX.SIU8.0926.SM.COH1X	55	Lung	OLD	Lung
GTEX.SJXC.0526.SM.2XCFG	65	Muscle - Skeletal	OLD	Muscle
GTEX.SJXC.1026.SM.EYYVA	65	Lung	OLD	Lung
GTEX.SNMC.0126.SM.2XCFO	25	Heart - Left Ventricle	YOUNG	Heart
GTEX.SNMC.0626.SM.4DM6H	25	Stomach	YOUNG	Stomach
GTEX.SNMC.1426.SM.2XCFM	25	Muscle - Skeletal	YOUNG	Muscle
GTEX.SNOS.0426.SM.32PMH	45	Lung	YOUNG	Lung
GTEX.SNOS.0826.SM.4DM5N	45	Stomach	YOUNG	Stomach
GTEX.SNOS.1526.SM.32PLW	45	Muscle - Skeletal	YOUNG	Muscle
GTEX.SSA3.0326.SM.32QPS	65	Muscle - Skeletal	OLD	Muscle
GTEX.SUCS.0326.SM.32PLL	75	Heart - Left Ventricle	OLD	Heart
GTEX.SUCS.0626.SM.32PM5	75	Lung	OLD	Lung
GTEX.SUCS.0926.SM.4DM4Z	75	Stomach	OLD	Stomach
GTEX.SUCS.1626.SM.32PLS	75	Muscle - Skeletal	OLD	Muscle
GTEX.T5JC.0626.SM.3NMA6	25	Muscle - Skeletal	YOUNG	Muscle
GTEX.T5JC.0826.SM.32PMC	25	Lung	YOUNG	Lung
GTEX.T5JC.1926.SM.4DM6Q	25	Stomach	YOUNG	Stomach
GTEX.T5JC.2326.SM.32PMR	25	Brain - Cerebellum	YOUNG	Brain
GTEX.T6MN.0526.SM.32PMS	55	Muscle - Skeletal	OLD	Muscle
GTEX.T6MN.0826.SM.32PM4	55	Lung	OLD	Lung
GTEX.T6MN.0926.SM.32PLX	55	Heart - Left Ventricle	OLD	Heart
GTEX.T6MN.2526.SM.32PMN	55	Brain - Cerebellum	OLD	Brain
GTEX.T8EM.0326.SM.3DB7F	45	Lung	YOUNG	Lung
GTEX.T8EM.1226.SM.4DM5J	45	Stomach	YOUNG	Stomach
GTEX.T8EM.1326.SM.3DB7G	45	Muscle - Skeletal	YOUNG	Muscle
GTEX.TKQ1.0526.SM.4DXTG	35	Stomach	YOUNG	Stomach
GTEX.TKQ1.1426.SM.4GICK	35	Muscle - Skeletal	YOUNG	Muscle
GTEX.TKQ2.0826.SM.33HB6	55	Muscle - Skeletal	OLD	Muscle
GTEX.TKQ2.0926.SM.4DXU5	55	Stomach	OLD	Stomach
GTEX.TMZS.0326.SM.3DB9P	65	Muscle - Skeletal	OLD	Muscle
GTEX.U3ZG.0326.SM.47JXN	55	Muscle - Skeletal	OLD	Muscle
GTEX.U3ZH.0326.SM.3DB7A	35	Heart - Left Ventricle	YOUNG	Heart
GTEX.U3ZH.0526.SM.3DB75	35	Lung	YOUNG	Lung
GTEX.U3ZH.1926.SM.4DXTR	35	Muscle - Skeletal	YOUNG	Muscle
GTEX.U3ZM.0426.SM.3DB73	45	Lung	YOUNG	Lung
GTEX.U3ZM.1226.SM.3DB9G	45	Muscle - Skeletal	YOUNG	Muscle
GTEX.U412.0326.SM.3DB9L	65	Muscle - Skeletal	OLD	Muscle
GTEX.U412.0826.SM.3DB9K	65	Lung	OLD	Lung
GTEX.U4B1.0326.SM.3DB8K	45	Heart - Left Ventricle	YOUNG	Heart
GTEX.U4B1.1026.SM.4DXT1	45	Stomach	YOUNG	Stomach
GTEX.U4B1.1626.SM.3DB8N	45	Muscle - Skeletal	YOUNG	Muscle
GTEX.U8T8.1426.SM.3DB9H	65	Muscle - Skeletal	OLD	Muscle
GTEX.U8T8.2226.SM.3DB95	65	Lung	OLD	Lung
GTEX.U8XE.0726.SM.3DB8O	35	Muscle - Skeletal	YOUNG	Muscle
GTEX.U8XE.1126.SM.3DB8W	35	Heart - Left Ventricle	YOUNG	Heart
GTEX.U8XE.1426.SM.3DB8Q	35	Lung	YOUNG	Lung
GTEX.UJMC.0526.SM.3GAE3	55	Heart - Left Ventricle	OLD	Heart
GTEX.UJMC.0726.SM.3GADX	55	Lung	OLD	Lung
GTEX.UJMC.1226.SM.4IHLI	55	Stomach	OLD	Stomach
GTEX.UJMC.1826.SM.3GADT	55	Muscle - Skeletal	OLD	Muscle
GTEX.UPJH.0526.SM.4IHK8	55	Muscle - Skeletal	OLD	Muscle
GTEX.UPJH.0826.SM.4WKFD	55	Lung	OLD	Lung
GTEX.UPK5.0326.SM.CYPR4	45	Heart - Left Ventricle	YOUNG	Heart
GTEX.UPK5.1126.SM.3GAEJ	45	Lung	YOUNG	Lung
GTEX.UPK5.2126.SM.4JBJK	45	Stomach	YOUNG	Stomach
GTEX.UTHO.0726.SM.3GAEN	65	Muscle - Skeletal	OLD	Muscle
GTEX.UTHO.2926.SM.3P5Z9	65	Brain - Cerebellum	OLD	Brain
GTEX.V1D1.0526.SM.4JBGW	55	Heart - Left Ventricle	OLD	Heart
GTEX.V1D1.0826.SM.3P5ZA	55	Lung	OLD	Lung
GTEX.V1D1.1726.SM.4JBHB	55	Stomach	OLD	Stomach
GTEX.V1D1.2426.SM.3GAER	55	Muscle - Skeletal	OLD	Muscle
GTEX.V955.0726.SM.3GAFG	65	Heart - Left Ventricle	OLD	Heart
GTEX.V955.1326.SM.4JBHR	65	Stomach	OLD	Stomach
GTEX.V955.2426.SM.3GAEF	65	Muscle - Skeletal	OLD	Muscle
GTEX.VJYA.0326.SM.3GAEX	65	Lung	OLD	Lung
GTEX.VJYA.1026.SM.4KL21	65	Stomach	OLD	Stomach
GTEX.VJYA.1926.SM.3GIJJ	65	Muscle - Skeletal	OLD	Muscle
GTEX.VUSG.0926.SM.3GIK6	55	Lung	OLD	Lung
GTEX.VUSG.2626.SM.4KKZI	55	Muscle - Skeletal	OLD	Muscle
GTEX.WFG7.0526.SM.3GIKI	25	Lung	YOUNG	Lung
GTEX.WFG7.0726.SM.3GIKO	25	Heart - Left Ventricle	YOUNG	Heart
GTEX.WFG7.1326.SM.4LMK1	25	Stomach	YOUNG	Stomach
GTEX.WFG7.2226.SM.3GIKP	25	Muscle - Skeletal	YOUNG	Muscle
GTEX.WFG8.0626.SM.3GILJ	25	Heart - Left Ventricle	YOUNG	Heart
GTEX.WFG8.0926.SM.3GIKJ	25	Lung	YOUNG	Lung
GTEX.WFG8.1326.SM.4LVN3	25	Stomach	YOUNG	Stomach
GTEX.WFG8.2426.SM.3GILL	25	Muscle - Skeletal	YOUNG	Muscle
GTEX.WFJO.0326.SM.3GIL3	35	Lung	YOUNG	Lung
GTEX.WFJO.1126.SM.4LVLZ	35	Stomach	YOUNG	Stomach
GTEX.WFON.0326.SM.3GIKX	45	Heart - Left Ventricle	YOUNG	Heart
GTEX.WFON.0426.SM.3GIL4	45	Lung	YOUNG	Lung
GTEX.WFON.1126.SM.4LVMA	45	Stomach	YOUNG	Stomach
GTEX.WFON.2326.SM.3LK7M	45	Muscle - Skeletal	YOUNG	Muscle
GTEX.WH7G.0426.SM.3NMBJ	45	Heart - Left Ventricle	YOUNG	Heart
GTEX.WH7G.0726.SM.3NMBM	45	Lung	YOUNG	Lung
GTEX.WH7G.1526.SM.4LVMX	45	Stomach	YOUNG	Stomach
GTEX.WHPG.0426.SM.4M1XW	55	Stomach	OLD	Stomach
GTEX.WHPG.0826.SM.3NMBF	55	Heart - Left Ventricle	OLD	Heart
GTEX.WHPG.1426.SM.3NMBB	55	Lung	OLD	Lung
GTEX.WHPG.2226.SM.3NMBO	55	Muscle - Skeletal	OLD	Muscle
GTEX.WHSB.0326.SM.5FQSD	55	Lung	OLD	Lung
GTEX.WHSB.1226.SM.4M1XR	55	Stomach	OLD	Stomach
GTEX.WHSB.1826.SM.3TW8M	55	Muscle - Skeletal	OLD	Muscle
GTEX.WHSE.0526.SM.5GZZD	25	Muscle - Skeletal	YOUNG	Muscle
GTEX.WHSE.0926.SM.3NMBS	25	Heart - Left Ventricle	YOUNG	Heart
GTEX.WHSE.2926.SM.3NMBG	25	Brain - Cerebellum	YOUNG	Brain
GTEX.WHWD.0426.SM.3LK83	55	Heart - Left Ventricle	OLD	Heart
GTEX.WHWD.1426.SM.4OORU	55	Stomach	OLD	Stomach
GTEX.WK11.0526.SM.3NB3O	55	Lung	OLD	Lung
GTEX.WK11.0826.SM.EZ6LH	55	Heart - Left Ventricle	OLD	Heart
GTEX.WK11.2526.SM.3NM9Y	55	Muscle - Skeletal	OLD	Muscle
GTEX.WL46.0626.SM.3LK7R	55	Muscle - Skeletal	OLD	Muscle
GTEX.WL46.0926.SM.3LK7T	55	Heart - Left Ventricle	OLD	Heart
GTEX.WL46.2826.SM.3LK81	55	Brain - Cerebellum	OLD	Brain
GTEX.WOFL.0626.SM.3MJG3	65	Muscle - Skeletal	OLD	Muscle
GTEX.WOFM.0126.SM.3MJFE	25	Lung	YOUNG	Lung
GTEX.WOFM.1326.SM.3MJFR	25	Muscle - Skeletal	YOUNG	Muscle
GTEX.WQUQ.1426.SM.3MJFD	65	Heart - Left Ventricle	OLD	Heart
GTEX.WVJS.0826.SM.4MVNR	55	Lung	OLD	Lung
GTEX.WVLH.2926.SM.3MJG5	55	Brain - Cerebellum	OLD	Brain
GTEX.WWTW.0626.SM.4MVNS	55	Muscle - Skeletal	OLD	Muscle
GTEX.WY7C.0426.SM.3NB3C	55	Lung	OLD	Lung
GTEX.WY7C.0526.SM.3NB3D	55	Heart - Left Ventricle	OLD	Heart
GTEX.WY7C.1726.SM.4ONCC	55	Stomach	OLD	Stomach
GTEX.WY7C.2526.SM.3NB2N	55	Muscle - Skeletal	OLD	Muscle
GTEX.WYJK.0826.SM.3NM8Y	55	Lung	OLD	Lung
GTEX.WYJK.1026.SM.3NM8W	55	Heart - Left Ventricle	OLD	Heart
GTEX.WYJK.1726.SM.3NM9U	55	Muscle - Skeletal	OLD	Muscle
GTEX.WYJK.2526.SM.4ONDF	55	Stomach	OLD	Stomach
GTEX.WZTO.0426.SM.3NM99	45	Lung	YOUNG	Lung
GTEX.WZTO.0826.SM.3NM8Q	45	Muscle - Skeletal	YOUNG	Muscle
GTEX.WZTO.1326.SM.3NM8X	45	Heart - Left Ventricle	YOUNG	Heart
GTEX.WZTO.2126.SM.4PQYW	45	Stomach	YOUNG	Stomach
GTEX.WZTO.2826.SM.3NM8P	45	Brain - Cerebellum	YOUNG	Brain
GTEX.X261.0326.SM.3NMD4	55	Muscle - Skeletal	OLD	Muscle
GTEX.X261.1026.SM.3NMDL	55	Lung	OLD	Lung
GTEX.X261.1426.SM.4PQZ1	55	Heart - Left Ventricle	OLD	Heart
GTEX.X261.3126.SM.4PQZC	55	Brain - Cerebellum	OLD	Brain
GTEX.X3Y1.0426.SM.3P5Z4	45	Heart - Left Ventricle	YOUNG	Heart
GTEX.X3Y1.0626.SM.3P5YS	45	Lung	YOUNG	Lung
GTEX.X4LF.0526.SM.3NMB6	55	Lung	OLD	Lung
GTEX.X4XX.0626.SM.3NMC1	65	Muscle - Skeletal	OLD	Muscle
GTEX.X4XX.1026.SM.4QARO	65	Lung	OLD	Lung
GTEX.X4XX.2926.SM.3NMB1	65	Brain - Cerebellum	OLD	Brain
GTEX.X4XY.0626.SM.4E3IN	65	Muscle - Skeletal	OLD	Muscle
GTEX.X4XY.1026.SM.46MVX	65	Lung	OLD	Lung
GTEX.X585.1026.SM.46MW6	55	Lung	OLD	Lung
GTEX.X5EB.0426.SM.46MVY	45	Lung	YOUNG	Lung
GTEX.X5EB.2326.SM.46MW5	45	Muscle - Skeletal	YOUNG	Muscle
GTEX.X88G.0326.SM.47JZ4	35	Muscle - Skeletal	YOUNG	Muscle
GTEX.XAJ8.0326.SM.47JYI	45	Stomach	YOUNG	Stomach
GTEX.XAJ8.1026.SM.47JY9	45	Muscle - Skeletal	YOUNG	Muscle
GTEX.XBEC.0626.SM.4QARY	55	Muscle - Skeletal	OLD	Muscle
GTEX.XBEC.1026.SM.4QASM	55	Lung	OLD	Lung
GTEX.XBEC.1326.SM.4AT69	55	Heart - Left Ventricle	OLD	Heart
GTEX.XBED.0526.SM.47JY3	65	Heart - Left Ventricle	OLD	Heart
GTEX.XBED.0826.SM.47JYC	65	Lung	OLD	Lung
GTEX.XBED.1226.SM.4AT5V	65	Stomach	OLD	Stomach
GTEX.XBED.2626.SM.4E3J5	65	Muscle - Skeletal	OLD	Muscle
GTEX.XBEW.0226.SM.4AT6A	45	Lung	YOUNG	Lung
GTEX.XBEW.1026.SM.4QARV	45	Muscle - Skeletal	YOUNG	Muscle
GTEX.XBEW.1826.SM.4RTWX	45	Stomach	YOUNG	Stomach
GTEX.XGQ4.0326.SM.4GIEE	55	Heart - Left Ventricle	OLD	Heart
GTEX.XGQ4.0826.SM.4AT4T	55	Lung	OLD	Lung
GTEX.XGQ4.2326.SM.4AT53	55	Muscle - Skeletal	OLD	Muscle
GTEX.XLM4.2926.SM.4AT59	65	Brain - Cerebellum	OLD	Brain
GTEX.XMD1.0626.SM.EZ6MC	65	Muscle - Skeletal	OLD	Muscle
GTEX.XMD1.2826.SM.4AT5F	65	Brain - Cerebellum	OLD	Brain
GTEX.XMK1.1526.SM.EYYVO	45	Stomach	YOUNG	Stomach
GTEX.XPT6.0126.SM.4B65S	25	Heart - Left Ventricle	YOUNG	Heart
GTEX.XPT6.2026.SM.4B64V	25	Muscle - Skeletal	YOUNG	Muscle
GTEX.XPVG.0826.SM.4B654	55	Heart - Left Ventricle	OLD	Heart
GTEX.XPVG.1026.SM.4B64Y	55	Lung	OLD	Lung
GTEX.XPVG.1526.SM.4B66C	55	Stomach	OLD	Stomach
GTEX.XPVG.2526.SM.4B66D	55	Muscle - Skeletal	OLD	Muscle
GTEX.XQ3S.0426.SM.4BOOA	25	Muscle - Skeletal	YOUNG	Muscle
GTEX.XQ3S.0626.SM.4BOOB	25	Heart - Left Ventricle	YOUNG	Heart
GTEX.XQ3S.0926.SM.4BOPI	25	Lung	YOUNG	Lung
GTEX.XQ8I.0126.SM.4BOPL	55	Heart - Left Ventricle	OLD	Heart
GTEX.XQ8I.0626.SM.4BOPT	55	Muscle - Skeletal	OLD	Muscle
GTEX.XQ8I.1126.SM.4BOO2	55	Lung	OLD	Lung
GTEX.XQ8I.2026.SM.4BOOL	55	Stomach	OLD	Stomach
GTEX.XUYS.0326.SM.47JX2	55	Muscle - Skeletal	OLD	Muscle
GTEX.XXEK.0626.SM.4BRWE	55	Lung	OLD	Lung
GTEX.XXEK.0826.SM.4BRWG	55	Stomach	OLD	Stomach
GTEX.XXEK.0926.SM.4BRWH	55	Heart - Left Ventricle	OLD	Heart
GTEX.Y111.0326.SM.4SOIX	55	Muscle - Skeletal	OLD	Muscle
GTEX.Y111.1026.SM.4TT22	55	Lung	OLD	Lung
GTEX.Y111.2826.SM.4TT3O	55	Brain - Cerebellum	OLD	Brain
GTEX.Y3I4.0426.SM.4TT29	55	Lung	OLD	Lung
GTEX.Y3I4.0626.SM.4TT7A	55	Heart - Left Ventricle	OLD	Heart
GTEX.Y3I4.1626.SM.4TT7W	55	Stomach	OLD	Stomach
GTEX.Y3I4.2326.SM.4TT81	55	Muscle - Skeletal	OLD	Muscle
GTEX.Y5V6.0226.SM.4V6G7	65	Lung	OLD	Lung
GTEX.Y5V6.0826.SM.4VBRU	65	Heart - Left Ventricle	OLD	Heart
GTEX.Y5V6.1326.SM.4VDTF	65	Stomach	OLD	Stomach
GTEX.Y5V6.2626.SM.5IFIX	65	Muscle - Skeletal	OLD	Muscle
GTEX.Y8DK.0326.SM.4TT3P	65	Muscle - Skeletal	OLD	Muscle
GTEX.Y8DK.0726.SM.4TT3S	65	Brain - Cerebellum	OLD	Brain
GTEX.Y8E4.0326.SM.4VBRR	45	Heart - Left Ventricle	YOUNG	Heart
GTEX.Y8E4.0526.SM.4V6GC	45	Lung	YOUNG	Lung
GTEX.Y8E4.1026.SM.4VBQ5	45	Muscle - Skeletal	YOUNG	Muscle
GTEX.Y8E4.1526.SM.4WWDI	45	Stomach	YOUNG	Stomach
GTEX.Y8E5.0326.SM.57WBM	65	Muscle - Skeletal	OLD	Muscle
GTEX.Y9LG.0526.SM.4VBRY	35	Lung	YOUNG	Lung
GTEX.Y9LG.1026.SM.5IFJN	35	Stomach	YOUNG	Stomach
GTEX.Y9LG.1926.SM.5IFHY	35	Muscle - Skeletal	YOUNG	Muscle
GTEX.YB5E.0726.SM.4VDSH	45	Lung	YOUNG	Lung
GTEX.YB5E.1126.SM.664NU	45	Stomach	YOUNG	Stomach
GTEX.YB5E.2226.SM.5IFJ5	45	Muscle - Skeletal	YOUNG	Muscle
GTEX.YEC3.0226.SM.DO11B	55	Lung	OLD	Lung
GTEX.YEC3.0726.SM.CMKFH	55	Heart - Left Ventricle	OLD	Heart
GTEX.YEC3.1426.SM.D4P1S	55	Stomach	OLD	Stomach
GTEX.YEC3.2126.SM.4YCDB	55	Muscle - Skeletal	OLD	Muscle
GTEX.YEC4.0326.SM.4W216	45	Heart - Left Ventricle	YOUNG	Heart
GTEX.YEC4.0526.SM.4W21U	45	Lung	YOUNG	Lung
GTEX.YEC4.1426.SM.5IFHS	45	Stomach	YOUNG	Stomach
GTEX.YEC4.2226.SM.5IFJT	45	Muscle - Skeletal	YOUNG	Muscle
GTEX.YECK.0626.SM.4W1ZE	65	Muscle - Skeletal	OLD	Muscle
GTEX.YECK.0926.SM.4W214	65	Lung	OLD	Lung
GTEX.YF7O.0426.SM.5P9FS	55	Heart - Left Ventricle	OLD	Heart
GTEX.YF7O.0626.SM.4W21R	55	Lung	OLD	Lung
GTEX.YF7O.2526.SM.5IFJX	55	Muscle - Skeletal	OLD	Muscle
GTEX.YJ89.2926.SM.5P9IT	65	Brain - Cerebellum	OLD	Brain
GTEX.YJ8A.1526.SM.5P9FT	25	Stomach	YOUNG	Stomach
GTEX.Z93S.1326.SM.5CVMR	55	Muscle - Skeletal	OLD	Muscle
GTEX.Z93S.2826.SM.57WBL	55	Brain - Cerebellum	OLD	Brain
GTEX.Z9EW.1726.SM.5CVMO	45	Muscle - Skeletal	YOUNG	Muscle
GTEX.ZA64.0326.SM.5HL8T	25	Lung	YOUNG	Lung
GTEX.ZA64.0826.SM.5HL9U	25	Stomach	YOUNG	Stomach
GTEX.ZA64.2026.SM.5PNXT	25	Muscle - Skeletal	YOUNG	Muscle
GTEX.ZAB4.0426.SM.5HL7N	45	Muscle - Skeletal	YOUNG	Muscle
GTEX.ZAB4.0626.SM.5CVN3	45	Lung	YOUNG	Lung
GTEX.ZAB4.1026.SM.5HL7T	45	Heart - Left Ventricle	YOUNG	Heart
GTEX.ZAB4.1526.SM.5CVN7	45	Stomach	YOUNG	Stomach
GTEX.ZAB4.2926.SM.57WCV	45	Brain - Cerebellum	YOUNG	Brain
GTEX.ZAB5.0226.SM.5CVMH	55	Heart - Left Ventricle	OLD	Heart
GTEX.ZAB5.0626.SM.5PNVB	55	Lung	OLD	Lung
GTEX.ZAB5.2126.SM.5K7UN	55	Muscle - Skeletal	OLD	Muscle
GTEX.ZAKK.0326.SM.5EGHA	75	Muscle - Skeletal	OLD	Muscle
GTEX.ZDTS.0526.SM.4WKH9	65	Muscle - Skeletal	OLD	Muscle
GTEX.ZDTS.1026.SM.4WAXS	65	Lung	OLD	Lung
GTEX.ZDTS.1326.SM.6LLHE	65	Heart - Left Ventricle	OLD	Heart
GTEX.ZDTT.0726.SM.4WKFK	65	Heart - Left Ventricle	OLD	Heart
GTEX.ZDTT.0926.SM.5J2MS	65	Lung	OLD	Lung
GTEX.ZDXO.0326.SM.4WKHJ	65	Muscle - Skeletal	OLD	Muscle
GTEX.ZDXO.0726.SM.57WBT	65	Heart - Left Ventricle	OLD	Heart
GTEX.ZDXO.1326.SM.57WBS	65	Lung	OLD	Lung
GTEX.ZDXO.2926.SM.4WKFM	65	Brain - Cerebellum	OLD	Brain
GTEX.ZDYS.0226.SM.5HL4K	55	Heart - Left Ventricle	OLD	Heart
GTEX.ZDYS.0426.SM.5IJEQ	55	Lung	OLD	Lung
GTEX.ZDYS.1726.SM.5HL4Y	55	Muscle - Skeletal	OLD	Muscle
GTEX.ZDYS.1926.SM.5HL59	55	Stomach	OLD	Stomach
GTEX.ZEX8.0426.SM.DO92Y	55	Heart - Left Ventricle	OLD	Heart
GTEX.ZEX8.0526.SM.DO115	55	Lung	OLD	Lung
GTEX.ZEX8.1626.SM.4WKG7	55	Stomach	OLD	Stomach
GTEX.ZEX8.2526.SM.DO92M	55	Muscle - Skeletal	OLD	Muscle
GTEX.ZF28.0526.SM.4WKGW	65	Muscle - Skeletal	OLD	Muscle
GTEX.ZF28.0726.SM.4WKFU	65	Lung	OLD	Lung
GTEX.ZF28.2926.SM.4WKG1	65	Brain - Cerebellum	OLD	Brain
GTEX.ZG7Y.0926.SM.5EQ6O	55	Heart - Left Ventricle	OLD	Heart
GTEX.ZG7Y.1026.SM.4WWDG	55	Lung	OLD	Lung
GTEX.ZLFU.0226.SM.4WWFH	45	Heart - Left Ventricle	YOUNG	Heart
GTEX.ZLFU.1326.SM.DO11R	45	Stomach	YOUNG	Stomach
GTEX.ZLFU.2526.SM.DO91K	45	Muscle - Skeletal	YOUNG	Muscle
GTEX.ZPU1.0626.SM.4YCDM	45	Heart - Left Ventricle	YOUNG	Heart
GTEX.ZPU1.0926.SM.57WDO	45	Lung	YOUNG	Lung
GTEX.ZPU1.1626.SM.4WWB2	45	Stomach	YOUNG	Stomach
GTEX.ZQUD.0826.SM.57WDQ	35	Stomach	YOUNG	Stomach
GTEX.ZQUD.1526.SM.7IGO2	35	Heart - Left Ventricle	YOUNG	Heart
GTEX.ZQUD.1726.SM.7P8ON	35	Muscle - Skeletal	YOUNG	Muscle
GTEX.ZT9W.0726.SM.9JGG2	55	Lung	OLD	Lung
GTEX.ZT9W.1526.SM.4YCDE	55	Stomach	OLD	Stomach
GTEX.ZT9X.0326.SM.51MTE	45	Lung	YOUNG	Lung
GTEX.ZT9X.1826.SM.57WDU	45	Muscle - Skeletal	YOUNG	Muscle
GTEX.ZTTD.1126.SM.51MRP	55	Lung	OLD	Lung
GTEX.ZTX8.0426.SM.59HLG	25	Stomach	YOUNG	Stomach
GTEX.ZTX8.1626.SM.51MRY	25	Muscle - Skeletal	YOUNG	Muscle
GTEX.ZUA1.0326.SM.5NQA3	45	Muscle - Skeletal	YOUNG	Muscle
GTEX.ZUA1.0826.SM.4YCDL	45	Heart - Left Ventricle	YOUNG	Heart
GTEX.ZUA1.1026.SM.4YCEA	45	Lung	YOUNG	Lung
GTEX.ZUA1.2926.SM.59HL3	45	Brain - Cerebellum	YOUNG	Brain
GTEX.ZV7C.0326.SM.57WB1	55	Heart - Left Ventricle	OLD	Heart
GTEX.ZV7C.1626.SM.5NQ7E	55	Stomach	OLD	Stomach
GTEX.ZV7C.2426.SM.5NQ7Q	55	Muscle - Skeletal	OLD	Muscle
GTEX.ZVE2.0626.SM.5GU7I	55	Muscle - Skeletal	OLD	Muscle
GTEX.ZVP2.1626.SM.5GU5D	55	Stomach	OLD	Stomach
GTEX.ZVP2.2126.SM.5GU6E	55	Muscle - Skeletal	OLD	Muscle
GTEX.ZVZO.0326.SM.5HL4N	45	Muscle - Skeletal	YOUNG	Muscle
GTEX.ZVZP.0226.SM.5NQ73	55	Heart - Left Ventricle	OLD	Heart
GTEX.ZVZP.1726.SM.5GZWY	55	Stomach	OLD	Stomach
GTEX.ZVZP.2526.SM.57WBR	55	Muscle - Skeletal	OLD	Muscle
GTEX.ZWKS.0326.SM.5NQ7G	35	Muscle - Skeletal	YOUNG	Muscle
GTEX.ZXG5.0326.SM.5GICH	65	Muscle - Skeletal	OLD	Muscle
GTEX.ZXG5.0826.SM.5GID6	65	Lung	OLD	Lung
GTEX.ZY6K.0326.SM.5SIBB	55	Lung	OLD	Lung
GTEX.ZY6K.0726.SM.5A5L8	55	Stomach	OLD	Stomach
GTEX.ZY6K.2026.SM.5GZXQ	55	Muscle - Skeletal	OLD	Muscle
GTEX.ZYFC.0526.SM.5GIDF	55	Muscle - Skeletal	OLD	Muscle
GTEX.ZYFC.1126.SM.5E44W	55	Heart - Left Ventricle	OLD	Heart
GTEX.ZYFD.0326.SM.5NQ8I	55	Muscle - Skeletal	OLD	Muscle
GTEX.ZYFD.2926.SM.5GID9	55	Brain - Cerebellum	OLD	Brain
GTEX.ZYT6.0526.SM.5GIEA	35	Lung	YOUNG	Lung
GTEX.ZYT6.1626.SM.5E45R	35	Muscle - Skeletal	YOUNG	Muscle
GTEX.ZYT6.1726.SM.5E44P	35	Heart - Left Ventricle	YOUNG	Heart
GTEX.ZYW4.0526.SM.5GZZ5	65	Muscle - Skeletal	OLD	Muscle
GTEX.ZYW4.0926.SM.59HJS	65	Heart - Left Ventricle	OLD	Heart
GTEX.ZYW4.1526.SM.5SIBA	65	Lung	OLD	Lung
GTEX.ZZ64.0426.SM.5E43F	25	Stomach	YOUNG	Stomach
GTEX.ZZ64.1526.SM.5E43K	25	Muscle - Skeletal	YOUNG	Muscle
GTEX.ZZPT.0626.SM.5GZXT	55	Muscle - Skeletal	OLD	Muscle
GTEX.ZZPT.1326.SM.5E43H	55	Lung	OLD	Lung
GTEX.ZZPT.2926.SM.5EQ5S	55	Brain - Cerebellum	OLD	Brain

## Sheet: Region and Expression Overlaps
Developmental Regions (with Promoter accessibility) and Expression										Developmental Regions (with Promoter intersections) and Expression										Aging Regions (with Promoter accessibility) and Expression										Aging Regions (with Promoter intersections) and Expression
type	Intersect	Region-Associated Genes with RRA < 0.05	All RRA <0.05 RNA-seq genes	All RNA-seq genes	Region-associated Genes	hyper_P	FC Enrichment			type	Intersect	Region-Associated Genes with RRA < 0.05	All RRA <0.05 RNA-seq genes	All RNA-seq genes	Region-associated Genes	hyper_P	FC Enrichment			type	Intersect	Region-Associated Genes with significant DE	All DE RNA-seq genes	All RNA-seq genes	All Region-associated Genes	hyper_P	FC Enrichment			type	Intersect	Region-Associated Genes with significant DE	All DE RNA-seq genes	All RNA-seq genes	All Region-associated Genes	hyper_P	FC Enrichment
RRA Expression	All Region-Associated Genes	1502	8487	9816	2915	6.73657e-10	1.11122			RRA Expression	All Region-Associated Genes	1416	8487	9816	2625	0	1.16333			GTEX Expression DE	All Region-Associated Genes	297	8461	9842	619	0.197858	1.03793			GTEX Expression DE	All Region-Associated Genes	214	8461	9842	427	0.0569572	1.08414
FETALBIASED EXPRESSION	FETAL-BIASED Region-Associated Genes	1053	6224	12079	1916	0	1.61616			FETAL-BIASED EXPRESSION	FETAL-BIASED Region-Associated Genes	1154	6224	12079	2288	0	1.48321			YOUNGBIASED EXPRESSION	YOUNGBIASED Region-Associated Genes	89	4373	13930	388	0.69078	0.960066			YOUNGBIASED EXPRESSION	YOUNGBIASED Region-Associated Genes	90	4373	13930	377	0.523865	0.999181
ADULTBIASED_EXPRESSION	ADULT-BIASED Region-Associated Genes	236	2435	15868	999	0	1.7757			ADULT-BIASED EXPRESSION	ADULT-BIASED Region-Associated Genes	144	2435	15868	337	0	3.21185			OLDBIASED EXPRESSION	OLDBIASED Region-Associated Genes	31	4089	14214	231	0.999802	0.600696			OLDBIASED EXPRESSION	OLDBIASED Region-Associated Genes	5	4089	14214	50	0.99307	0.447616
Observed:										Observed:
	ADULTBIASED_DNASE	FETALBIASED_DNASE	pval	stat							ADULTBIASED_DNASE	FETALBIASED_DNASE	pval	stat						Observed:										Observed:
ADULTBIASED_RNA	236	96	7.18656e-107	482.175						ADULTBIASED_RNA	144	138	1.23188e-131	596.015							OLDBIASED	YOUNGBIASED	pval	stat							OLDBIASED	YOUNGBIASED	pval	stat
FETALBIASED_RNA	144	1053	7.18656e-107	482.175						FETALBIASED_RNA	10	1154	1.23188e-131	596.015						ADULTBIASED_RNA	31	132	0.00636159	7.44492						ADULTBIASED_RNA	5	110	0.26191	1.25863
																				FETALBIASED_RNA	45	89	0.00636159	7.44492						FETALBIASED_RNA	9	90	0.26191	1.25863
Expected:										Expected:
	ADULTBIASED_DNASE	FETALBIASED_DNASE									ADULTBIASED_DNASE	FETALBIASED_DNASE								Expected:										Expected:
ADULTBIASED_RNA	82.5114	249.489								ADULTBIASED_RNA	30.0332	251.967									OLDAGE	YOUNGAGE									OLDAGE	YOUNGAGE
FETALBIASED_RNA	297.489	899.511								FETALBIASED_RNA	123.967	1040.03								ADULTBIASED_RNA	41.7104	121.29								ADULTBIASED_RNA	7.52336	107.477
																				FETALBIASED_RNA	34.2896	99.7104								FETALBIASED_RNA	6.47664	92.5234
Developmental RRA Genes – GTEX DE Genes – Intersections
type	Intersect	RRA Genes with GTEX DE Assignment	All DE RNA-seq genes	All RNA-seq genes	All RRA Genes	hyper_P	FC Enrichment
RRA Expression	GTEX Expression DE	4919	9663	9648	9874	0.739907	0.995581
FETAL-BIASED EXPRESSION	YOUNGAGE EXPRESSION	2408	4928	14383	6740	0	1.40001
ADULT-BIASED_EXPRESSION	OLDAGE EXPRESSION	489	4737	14574	2942	1	0.677591

## Sheet: RNA-seq Genes - GO Enrich
ADULT-BIASED RRA GENES – GO BP Enrichments:											OLD-BIASED DE GENES (adj. P-val < 0.05) – GO BP Enrichments:
ID	Description	GeneRatio	BgRatio	pvalue	p.adjust	qvalue	geneID	Count			ID	Description	GeneRatio	BgRatio	pvalue	p.adjust	qvalue	geneID	Count
GO:0050911	detection of chemical stimulus involved in sensory perception of smell	316/3296	394/17949	2.63174e-161	1.51351e-157	1.49732e-157	4994/196335/442179/8392/286362/390442/343170/8590/254973/286365/8388/402135/341276/390058/390064/441933/219870/135941/442361/143502/7932/390084/81697/127623/390264/255725/120787/346525/390059/219869/390326/393046/138804/392138/390892/26492/338662/138805/219858/390054/138802/135946/81472/390261/283159/79317/81282/401665/79490/26689/343406/219484/26248/219447/81328/390265/138882/127064/390649/39118…	316			GO:0061448	connective tissue development	139/4178	270/16916	1.40154e-21	8.77086e-18	6.7997e-18	64102/30812/5310/9971/864/960/846/1301/8692/2121/2736/2249/5915/2260/4208/7481/2778/5744/91355/5155/150356/1690/655/57642/9658/55512/7227/9149/7040/1311/3696/3200/3202/2737/657/59/1277/579/4192/55553/4617/81029/2251/4256/1303/4015/4090/5159/1294/2202/3398/1386/5396/4209/8609/1490/3213/1958/8785/6615/81578/860/583/652/8200/54795/1289/22856/4147/4017/7482/6660/11173/4856/23213/4322/2247/658/4060/12…	139
GO:0007608	sensory perception of smell	324/3296	421/17949	1.7303e-155	4.97549e-152	4.92226e-152	4994/196335/442179/8392/286362/390442/343170/8590/254973/286365/8388/402135/341276/390058/390064/441933/219870/135941/442361/143502/7932/390084/81697/127623/390264/255725/120787/346525/390059/219869/390326/393046/138804/392138/10941/390892/26492/338662/4975/138805/219858/390054/138802/135946/81472/390261/283159/79317/81282/401665/79490/26689/343406/219484/26248/219447/81328/390265/138882/127064/3…	324			GO:0030198	extracellular matrix organization	169/4178	363/16916	5.50434e-20	1.42238e-16	1.10271e-16	3683/1634/23187/960/7133/3381/7077/1462/1298/2006/10319/2296/1301/23332/6624/2192/2191/50509/1310/1307/4313/22795/3655/151887/7042/7093/25/5155/150356/284217/28984/55512/2294/7040/1311/3696/10049/165/1842/2022/3384/1277/4617/1303/1297/64094/3910/4015/6678/1294/3676/2335/4237/7276/1490/2331/8434/4035/1300/8785/6939/1289/3911/10266/3691/63827/4629/4017/5156/2113/8728/3569/1515/2295/23213/64066/4322…	169
GO:0009593	detection of chemical stimulus	337/3296	478/17949	6.98276e-142	8.03157e-139	7.94565e-139	4994/563/196335/442179/23643/353164/8392/286362/390442/343170/8590/254973/286365/8388/402135/341276/80834/390058/390064/441933/219870/135941/442361/143502/7932/390084/81697/127623/390264/255725/120787/346525/390059/219869/390326/393046/138804/392138/10941/390892/26492/338662/138805/219858/390054/138802/135946/81472/390261/283159/79317/81282/401665/79490/26689/343406/219484/26248/219447/81328/3902…	337			GO:0043062	extracellular structure organization	187/4178	416/16916	6.81868e-20	1.42238e-16	1.10271e-16	3683/1634/23187/960/7133/3381/7077/1462/1298/2006/10319/2296/1301/10347/949/23332/6624/2192/2191/50509/1310/1307/1071/4313/22795/3655/151887/7042/7093/25/29801/5155/150356/5360/655/284217/28984/55512/2294/7040/1311/3696/10049/165/1842/2022/3384/1277/345/4617/1303/1297/64094/3910/4015/6678/1294/3676/2335/4237/335/7276/1490/56155/2331/8434/4035/1300/8785/6939/348/1289/3911/10266/3691/63827/4629/401…	187
GO:0031424	keratinization	122/3296	223/17949	1.91823e-34	1.57596e-31	1.5591e-31	3859/23581/1475/440023/100507608/439915/6701/340654/254910/387267/3883/3885/3884/3891/112802/653240/3890/3888/9119/147409/51350/337977/386674/81851/643803/386685/387266/85285/728224/2312/643394/353135/100505724/353142/100505753/100533177/100132386/730755/81872/386684/386672/140258/126638/337879/81850/1823/728255/386683/337978/386681/728318/85280/353144/440051/26154/26239/84616/353134/337976/33796…	122			GO:0001525	angiogenesis	206/4178	486/16916	3.37095e-18	5.27386e-15	4.08861e-15	64102/23129/126393/221981/6376/6915/5286/1634/3670/3082/25960/9047/2324/9734/2296/51564/4804/10203/6672/22846/4854/4162/2260/2191/10411/4313/285/57556/7042/25/8829/4627/6789/140862/182/27286/2321/28984/6422/25865/54922/3696/5764/857/3200/3202/3315/4223/2022/219699/10014/2549/55294/4192/2004/2251/23328/64094/7422/9037/6678/7060/2246/5159/3273/2335/1386/2034/3953/10000/356/8828/7128/1490/6943/5228/…	206
GO:0035278	miRNA mediated inhibition of translation	48/3296	74/17949	1.44204e-18	6.91097e-16	6.83704e-16	574457/100126314/574501/100126355/406954/406955/406881/724029/442910/406958/407019/406911/406912/406995/406901/406990/406894/407000/407035/406882/406951/406895/442891/406940/407054/574461/406930/406985/574473/407001/406949/407029/574474/407046/406987/406929/406892/406950/406900/406994/406921/406937/407006/407053/407020/100126296/407007/406893	48			GO:0001503	ossification	171/4178	384/16916	8.4621e-18	1.05912e-14	8.21091e-15	30812/6863/9902/25937/3082/3381/4653/846/1462/2296/1301/51564/10272/8626/2736/58476/4208/7481/43/4313/2778/5744/5027/8646/7042/91355/655/9770/182/5020/91851/55512/6422/7040/6320/1311/1021/1749/5764/3199/2737/54829/657/1277/4192/10312/4617/2735/4256/5191/4015/6678/4090/93/3398/525/4209/1490/8074/7010/63923/8600/7291/5552/6615/860/652/8200/4958/6608/57045/7166/54857/3727/54795/79412/22856/3021/9365…	171
GO:0040033	negative regulation of translation, ncRNA-mediated	48/3296	74/17949	1.44204e-18	6.91097e-16	6.83704e-16	574457/100126314/574501/100126355/406954/406955/406881/724029/442910/406958/407019/406911/406912/406995/406901/406990/406894/407000/407035/406882/406951/406895/442891/406940/407054/574461/406930/406985/574473/407001/406949/407029/574474/407046/406987/406929/406892/406950/406900/406994/406921/406937/407006/407053/407020/100126296/407007/406893	48			GO:0007517	muscle organ development	169/4178	386/16916	9.69204e-17	9.24914e-14	7.17049e-14	56603/30812/55692/1634/3670/9172/9099/9734/2006/60529/2296/1301/4638/2121/2260/26281/4208/1310/3776/43/6910/825/4637/7042/7093/10521/1120/85366/140706/8736/4092/2010/6901/6445/7040/858/857/4223/2022/657/2648/6442/3131/4621/8929/1410/55553/4617/2735/9750/221662/4015/4209/5997/5629/7139/1385/6943/1958/6909/64091/7291/23363/1948/652/6939/6495/5300/8910/93986/6608/3235/3236/54567/8048/6665/3911/14525…	169
GO:0045974	regulation of translation, ncRNA-mediated	48/3296	74/17949	1.44204e-18	6.91097e-16	6.83704e-16	574457/100126314/574501/100126355/406954/406955/406881/724029/442910/406958/407019/406911/406912/406995/406901/406990/406894/407000/407035/406882/406951/406895/442891/406940/407054/574461/406930/406985/574473/407001/406949/407029/574474/407046/406987/406929/406892/406950/406900/406994/406921/406937/407006/407053/407020/100126296/407007/406893	48			GO:0007409	axonogenesis	196/4178	468/16916	1.03458e-16	9.24914e-14	7.17049e-14	6405/23129/170302/3475/1951/56920/2534/7869/3670/9369/9846/65078/2042/4804/9423/1496/4756/1400/2736/10371/60/5063/4133/4983/285220/54437/4504/393/57556/1808/10013/25/8829/1943/9252/55816/655/284217/4168/79006/7976/9253/5802/1749/3199/5803/2737/1855/2625/6387/219699/9211/8153/8929/2549/113246/10090/7422/9037/1627/90249/3676/6711/57142/2335/25806/9048/6794/8828/1385/8609/8013/63923/9499/22865/7852/…	196
GO:0042742	defense response to bacterium	103/3296	255/17949	1.31395e-16	5.81271e-14	5.75052e-14	6279/6280/6170/2634/3133/3240/6156/3346/1051/2207/57817/5320/6590/140823/245911/3512/57379/641517/6556/57119/5897/1669/6283/84569/3593/4153/3906/26253/122665/644414/55894/3934/338322/1991/729201/245909/117285/353142/10407/85569/613209/140881/4069/128488/406955/245939/245929/306/353144/140850/54/254773/2268/6779/149233/84659/81623/140880/119180/117159/354/140596/503618/245928/245938/245932/245915/…	103			GO:0030335	positive regulation of cell migration	200/4178	493/16916	2.61773e-15	1.63818e-12	1.27001e-12	6405/6863/56920/5286/7869/972/3082/25960/4653/23604/2324/79567/9734/23224/51564/4638/949/23332/10371/4162/5063/2260/54437/7481/50507/7205/3655/57556/7042/10013/3717/25/8829/5155/623/655/27286/8874/2321/2294/79791/57214/85360/208/25865/7040/5764/857/3315/5919/2625/6387/64115/6355/1277/2549/4192/81029/3458/4739/9750/23328/64094/7422/9037/6678/7060/2246/5159/2771/27086/3676/57142/2335/9181/10000/562…	200
GO:0006119	oxidative phosphorylation	69/3296	142/17949	1.9656e-16	8.07439e-14	7.98801e-14	4537/4539/4513/4536/4508/4535/4514/4538/4519/4512/4540/4707/521/9551/1345/10476/4725/4729/4695/522/1327/1340/1347/1329/23479/55967/4694/9377/400916/388753/27089/4717/4714/4696/4716/4715/1339/4728/5232/4702/4700/4701/516/26471/29796/4706/4509/1346/1350/1351/4711/51085/1337/4722/509/65018/513/84275/84300/539/11315/4710/89/4541/7388/515/4708/4718/4709	69			GO:0007156	homophilic cell adhesion via plasma membrane adhesion molecules	88/4178	167/16916	5.96904e-15	3.11285e-12	2.41327e-12	1951/5310/28513/56131/56142/56113/83259/53841/27328/56133/56132/26167/56130/56129/1004/51294/84966/27253/56128/56126/56122/56124/9499/5819/1828/1825/5100/57575/9746/64403/1009/1012/83872/152330/90952/64405/65217/1006/64221/64084/5979/8642/22883/29930/682/56127/1003/6092/56123/389118/54510/79633/23654/56125/3897/56114/9752/56140/56141/56143/56144/56146/56147/55714/56136/5098/56097/56139/26025/5610…	88
GO:0006959	humoral immune response	98/3296	252/17949	1.28857e-14	4.94038e-12	4.88752e-12	6279/6280/6170/3119/3133/1675/718/8547/710/716/6156/3346/629/5320/6590/140823/3512/56832/3452/6556/57119/51279/1669/715/6283/26525/3273/2919/57829/4153/55894/3934/5079/3441/11326/3440/1991/117285/1604/10407/85569/4069/713/3449/733/140850/81494/708/3467/2597/84659/3445/80341/81623/117159/354/128822/966/1361/6357/1370/574461/574473/2920/3444/3448/1672/1380/2213/1235/3439/5225/140683/57115/5919/820/…	98			GO:0030278	regulation of ossification	92/4178	189/16916	6.94232e-13	2.17225e-10	1.68406e-10	6863/3082/51564/8626/4208/2778/5027/8646/7042/655/9770/182/5020/6422/7040/1311/1021/5764/3199/2737/657/4192/10312/2735/4256/4090/93/3398/8074/63923/7291/5552/860/652/4958/57045/7166/54857/3727/54795/79412/22856/9365/4038/3569/7020/658/10140/3491/1893/197/6423/4851/2697/654/56172/6497/4041/9249/54361/4921/4880/202151/115908/3611/4088/50964/4054/3516/255743/7480/1901/5734/596/1051/162466/54880/9241…	92
GO:0043588	skin development	140/3296	418/17949	5.5247e-14	1.98578e-11	1.96454e-11	8644/10628/3859/388698/23581/1475/440023/5920/100507608/439915/8456/6701/340654/254910/247/387267/3883/3885/3884/3891/112802/653240/3890/3888/9119/147409/51350/337977/386674/81851/643803/386685/387266/85285/3229/728224/2312/643394/353135/100505724/353142/100505753/100533177/100132386/730755/81872/386684/100129271/386672/140258/126638/337879/81850/1823/728255/386683/337978/386681/728318/4831/85280…	140			GO:0001667	ameboidal-type cell migration	157/4178	382/16916	7.76419e-13	2.31373e-10	1.79374e-10	6405/23129/30812/6863/6915/56920/5286/1634/7869/3670/25960/2324/9734/51564/6672/8692/22846/949/23332/10371/2249/5063/2260/2191/4208/54437/7481/5829/393/285/57556/7042/10013/25/8829/23616/5155/4627/655/27286/8874/28984/85360/25865/7040/5764/3315/4223/2625/10014/8929/55294/397/3458/23328/64094/7422/9037/6678/2246/3273/27086/3676/57142/2335/10000/5629/335/8828/7010/7291/152007/3164/5335/1948/652/154…	157
GO:0006614	SRP-dependent cotranslational protein targeting to membrane	51/3296	102/17949	3.91574e-13	1.31664e-10	1.30255e-10	378706/6232/6227/6133/6170/6155/6229/6029/6217/6164/6169/6136/6173/6224/6222/11224/6194/6210/6207/6228/6146/6152/6160/6230/9349/6201/6143/6156/6231/6167/6154/6205/6235/6144/6209/6139/6157/3921/6189/6171/6218/378707/6129/6233/6147/6206/6135/6137/6204/6165/7311	51			GO:0010959	regulation of metal ion transport	153/4178	378/16916	6.31751e-12	1.36327e-09	1.05689e-09	6376/920/2534/1272/477/3755/846/3757/816/4638/1815/10681/815/88/117/3781/4986/79570/2775/28954/5027/80024/4842/84502/825/25/255057/5155/623/128414/6640/57119/2332/2259/3356/57214/10859/7040/857/2645/6387/8787/57620/3458/2916/5159/8614/2771/54800/30818/2641/116444/845/5311/1394/3208/7852/10268/5335/4987/3306/10142/7533/135/2847/482/3741/84766/1804/81/9104/51669/187/5270/23479/7225/53826/486/4283/1…	153
GO:0008544	epidermis development	147/3296	463/17949	1.52796e-12	4.39364e-10	4.34663e-10	8644/10628/3859/388698/23581/2171/1475/440023/5920/100507608/439915/8456/6701/340654/254910/247/387267/3883/3885/3884/3891/112802/653240/3890/3888/9119/147409/10481/51350/337977/386674/81851/643803/386685/387266/85285/3229/728224/2312/643394/353135/100505724/353142/100505753/100533177/100132386/730755/81872/386684/100129271/386672/140258/126638/337879/81850/1823/728255/5459/386683/337978/386681/7…	147			GO:0019932	second-messenger-mediated signaling	171/4178	435/16916	6.67383e-12	1.39216e-09	1.07929e-09	5577/6915/4843/920/5725/477/2981/5733/2983/10203/5141/6343/29995/108/117/10411/2778/5744/5027/4842/11069/84502/997/23551/1113/84174/83988/333/10900/84687/683/10645/57211/7422/2771/7535/2641/2274/5997/23266/2633/845/5311/7320/1394/8600/576/3208/7852/5737/10268/5335/4987/1907/8445/2770/135/50940/91860/196883/348/54795/9104/4772/84658/10266/10267/6754/187/3357/109/3973/51196/8654/4283/3651/1012/8844…	171
GO:0019730	antimicrobial humoral response	50/3296	117/17949	8.54979e-10	1.89115e-07	1.87091e-07	6279/6280/6170/3133/6156/3346/5320/6590/140823/3512/6556/57119/1669/6283/26525/3273/2919/55894/3934/1991/117285/10407/85569/4069/140850/2597/84659/80341/81623/117159/354/128822/6357/2920/1672/5225/140683/57115/5919/820/3347/5650/10578/1113/6407/5967/114771/4589/653423/5266	50			GO:0050678	regulation of epithelial cell proliferation	134/4178	324/16916	2.2086e-11	4.31919e-09	3.3485e-09	64102/1750/3670/864/2324/5798/4804/22846/55679/8626/2260/4208/5241/7042/8829/5155/2321/28984/6422/25865/7040/1021/1749/5764/858/857/3202/2625/6387/657/55294/4192/2735/1027/7422/9037/6678/7060/2246/3280/3676/57142/5967/1386/10000/10765/5629/6794/8828/7128/8013/5228/7010/7291/3164/5335/1948/652/8200/9572/6495/64919/7538/93986/6608/54567/8854/1028/348/93974/9104/4853/187/3357/26257/3586/153090/23213…	134
GO:0000184	nuclear-transcribed mRNA catabolic process, nonsense-mediated decay	49/3296	120/17949	7.84713e-09	1.61174e-06	1.5945e-06	6232/6227/6133/6170/6155/6229/6217/6164/6169/6136/6173/6224/6222/11224/6194/6210/6207/6228/6146/6152/6160/6230/9349/6201/6143/6156/6231/6167/6154/6205/6235/6144/6209/6139/6157/3921/6189/6171/6218/6129/6233/6147/6206/6135/6137/4116/6204/6165/7311	49			GO:0050673	epithelial cell proliferation	151/4178	380/16916	4.48843e-11	8.26135e-09	6.40469e-09	64102/1750/3670/3082/864/2324/5798/4804/22846/55679/949/8626/2260/2191/4208/5241/2099/7042/8829/5155/2321/28984/6422/25865/7040/1021/1749/5764/858/857/3202/2625/6387/657/55294/4192/2735/1027/7422/9037/6678/7060/2246/3280/3676/57142/5967/3398/1386/10000/10765/5629/6794/335/8828/7128/8013/5228/7010/8600/7291/3164/5335/1948/652/8200/9572/6495/64919/7538/93986/6608/54567/8854/1028/348/93974/9104/4017…	151
GO:1903670	regulation of sprouting angiogenesis	47/3296	116/17949	2.10737e-08	4.17914e-06	4.13443e-06	6271/574408/574453/664616/100187716/406968/574452/406903/407019/406973/442909/407030/406964/574409/407037/406894/406910/407035/2624/494324/407034/406951/407015/574434/407016/2752/407042/406930/406949/406942/407041/406929/407031/406950/406889/406972/2693/10519/494326/406921/301/407006/5315/407007/100423036/406893/100506013	47			GO:0031589	cell-substrate adhesion	140/4178	346/16916	5.12705e-11	8.67164e-09	6.72278e-09	3683/6376/5310/960/4653/2042/9341/10319/22998/4287/10420/87/55679/23332/88/2192/50509/1307/7205/22795/5829/3655/285/151887/10580/3717/25/8829/3956/11078/182/8874/2294/10391/6422/1021/5764/1842/1277/683/4192/4617/4739/64094/7422/3273/3676/2335/2633/335/1490/9480/7010/63923/10174/3204/4035/7471/23499/8910/81/3911/4814/3691/27329/51754/11117/50624/8499/3695/10516/1012/8631/54828/126147/3491/1295/901…	140
GO:0050832	defense response to fungus	22/3296	40/17949	2.1928e-07	3.94087e-05	3.89871e-05	6279/6280/3346/57817/1669/6283/26525/3273/122665/338322/1991/245909/2597/84659/117159/245928/503841/3605/5919/3347/10578/1113	22			GO:0001649	osteoblast differentiation	94/4178	211/16916	2.03887e-10	2.60392e-08	2.01872e-08	30812/9902/25937/3082/3381/4653/1462/51564/8626/2736/58476/4208/7481/43/2778/5744/8646/91355/655/9770/182/6422/1021/1749/3199/2737/657/1277/10312/2735/4015/4090/93/3398/4209/8074/63923/7291/6615/860/652/6608/57045/54857/3727/54795/3021/3569/658/51176/50846/10140/1291/3491/6423/340419/4851/2697/654/3192/89780/8321/6497/5745/4041/54361/4921/3020/4880/202151/115908/3611/4088/3481/7171/255743/6474/74…	94
GO:0046688	response to copper ion	22/3296	41/17949	3.91134e-07	6.61592e-05	6.54514e-05	4519/4512/4493/4502/4499/4501/4489/6284/4494/358/4495/645745/359/513/6647/84560/15/11315/1544/3552/1543/4490	22			GO:0051271	negative regulation of cellular component movement	125/4178	305/16916	2.08884e-10	2.6144e-08	2.02684e-08	6405/6376/6915/56920/11188/80199/1634/7869/1800/972/22998/6672/8692/22846/87/23332/10371/2192/4208/54437/7481/6910/393/8646/285/4345/57556/8829/182/57119/4092/28984/6422/7040/5764/4223/2022/2625/6387/657/10014/1027/397/9750/9037/1809/3273/11240/1843/63923/3204/8434/4035/6237/5300/54567/348/684/4301/81/55558/9104/23143/9314/153090/4856/90865/23213/80031/11117/2247/10500/11221/90102/9353/6423/2796/…	125
GO:0043537	negative regulation of blood vessel endothelial cell migration	29/3296	63/17949	4.36654e-07	7.17485e-05	7.09809e-05	3273/574408/574453/406968/574452/51378/406973/406984/406964/574409/407037/693225/406943/406951/407015/406918/574434/407016/574508/406917/406949/406987/406950/406972/2658/406994/406921/407006/100423036	29			GO:0050920	regulation of chemotaxis	93/4178	210/16916	3.74039e-10	4.33469e-08	3.36051e-08	6405/56920/7869/972/25960/23604/846/10371/2249/2260/54437/80024/285/57556/8829/5155/25865/7040/5764/3315/5919/6387/683/4192/9750/64094/7422/9037/7060/2246/5159/3273/11240/9048/5228/1843/7852/1948/1907/55558/23075/5156/3569/4856/347733/80031/2247/4916/1012/6375/6846/10500/6278/9353/9547/4851/7424/223117/89780/8817/4681/3673/2277/83700/4088/54910/3592/3627/80310/1901/7857/566/7423/4485/1240/2621/12…	93
GO:1905563	negative regulation of vascular endothelial cell proliferation	14/3296	20/17949	6.12366e-07	9.78255e-05	9.6779e-05	574408/574453/664616/406968/407030/574409/406943/407034/406918/407054/406917/406949/406921/6347	14			GO:0045785	positive regulation of cell adhesion	153/4178	398/16916	5.77137e-10	6.12684e-08	4.7499e-08	6376/9265/920/2534/923/972/864/960/3381/4653/10272/55679/2736/5063/1307/8646/30835/3655/151887/7042/3717/25/8829/3956/11078/655/4092/79576/959/10673/8874/2294/9780/8767/6422/3574/10859/64926/25865/7040/1021/5764/857/2737/1842/2625/6387/64115/3558/921/4192/975/3458/4739/9308/64094/7422/3273/3280/7535/3676/2335/7292/335/8013/7010/8600/10385/1948/970/4301/4814/2319/78986/10451/2113/301/8728/3569/314…	153
GO:0010257	NADH dehydrogenase complex assembly	29/3296	64/17949	6.58924e-07	9.9723e-05	9.86561e-05	4537/4536/4535/4538/4540/4707/4725/4729/4695/55967/4694/4717/4714/4696/4716/4715/4728/4702/4700/4701/4706/4711/4722/4710/4541/55863/4708/4718/4709	29			GO:0010721	negative regulation of cell development	131/4178	330/16916	9.30599e-10	9.09951e-08	7.05449e-08	6405/30812/26022/6376/3475/56920/7869/3670/7431/65078/4804/9423/1400/4854/10371/2192/4133/9139/1620/54437/4504/5744/393/57556/8829/112755/3956/23405/655/182/4168/11075/10859/7040/5802/5764/3199/2737/657/5376/8929/55294/7422/9037/1809/3280/57142/3398/9181/5997/2633/63923/5047/4035/1948/4821/9572/4974/7533/348/81/55558/4038/6658/1840/2045/81618/3569/7274/7225/80031/6496/22891/429/4916/116/351/10500…	131
FETAL-BIASED RRA GENES – GO BP Enrichments:											YOUNG-BIASED DE GENES (adj. P-val < 0.05) – GO BP Enrichments:
ID	Description	GeneRatio	BgRatio	pvalue	p.adjust	qvalue	geneID	Count			ID	Description	GeneRatio	BgRatio	pvalue	p.adjust	qvalue	geneID	Count
GO:0006402	mRNA catabolic process	266/6497	362/17949	4.05986e-48	2.58166e-44	1.88506e-44	6176/6122/26986/6187/6208/6134/6193/7314/6188/6132/7431/6189/9045/6203/6223/5518/4736/6175/3312/7534/6181/6202/6158/23521/6130/6124/6125/25873/6128/6168/6159/6138/6129/6233/6418/6222/6137/3192/26135/6141/6191/6142/7316/7514/7529/3184/6154/6228/4904/6167/6135/6206/6218/6139/6205/3315/6209/9349/1660/6157/677/3921/6194/7812/8125/3646/10236/6136/6234/6165/5708/55629/6224/1153/6229/6171/6204/8570/2988…	266			GO:0022613	ribonucleoprotein complex biogenesis	287/4513	455/16916	4.28338e-61	2.67283e-57	2.27695e-57	51096/11171/51121/23517/51491/10659/51154/51602/55781/1975/11218/10885/51018/114049/54475/1207/9733/56915/1653/29093/25929/22894/26747/51729/8668/54700/27292/55239/8602/8886/22803/6128/51575/6175/8487/6732/10291/23481/51386/8664/10419/1983/24148/51340/10528/79863/8780/8669/3646/10775/2091/54555/85865/8662/7458/51010/8661/10360/23560/4927/708/117246/55813/54433/2483/27339/11103/4839/55003/705/5747…	287
GO:0019080	viral gene expression	164/6497	191/17949	4.29999e-46	1.36718e-42	9.98277e-43	6176/6122/51386/6187/6208/6134/6193/6188/5094/6132/6189/9045/6203/6223/4736/6175/6181/6202/6158/23521/6130/6124/6125/25873/6128/6168/6159/6138/6129/6233/6222/6137/6141/6191/6142/6154/6228/64710/6167/6135/6206/8664/6218/6139/6205/6209/8665/9349/1660/6157/3921/6194/6136/6234/6165/6598/6224/6229/6171/6204/6235/8661/5430/7311/51497/6161/6201/5725/6160/6147/7175/6597/6210/6170/6232/6230/23435/5441/615…	164			GO:0034470	ncRNA processing	240/4513	376/16916	1.68618e-52	3.50725e-49	2.98779e-49	51096/6301/54888/4234/23517/54802/51154/51602/55781/10885/3735/23536/51018/24140/114049/3028/51095/56915/1653/22894/51729/27292/22929/8602/51637/339175/8886/22803/51575/51605/16/54517/23481/51493/8846/9692/10528/79863/9097/8780/1478/79650/123263/55756/10940/55174/10775/2091/54555/11062/26024/51010/10360/23560/117246/55813/54433/2483/83480/11103/4839/705/54974/9136/84128/79954/80135/54680/10969/79…	240
GO:0006413	translational initiation	155/6497	192/17949	6.045e-37	7.68803e-34	5.61358e-34	6176/6122/26986/1982/51386/6187/6208/6134/6193/6188/6132/6189/9045/6203/6223/4736/6175/6181/6202/6158/23521/6130/6124/6125/25873/6128/6168/6159/6138/6129/6233/1975/6222/6137/6141/6191/6142/5936/1973/6154/6228/10480/6167/6135/6206/10657/8664/6218/6139/6205/3315/6209/8665/9349/6157/3921/6194/8667/3646/6136/6234/10209/6165/6224/6229/6171/6204/6235/8661/7311/1974/6161/6201/4869/27335/6160/6147/7458/7…	155			GO:0140053	mitochondrial gene expression	113/4513	162/16916	1.8308e-30	1.63202e-27	1.3903e-27	54802/55173/84545/60488/64951/55699/3028/51095/29093/84273/4528/51650/55168/5442/8846/9692/124454/51073/2617/64983/56652/7019/708/51264/51258/54516/10884/23107/11222/9801/51253/64960/387338/55157/22868/63931/9617/219402/51116/10102/79072/57570/7978/6183/64981/55278/51318/26284/7818/92259/65080/64965/9238/57129/54534/29088/87178/10128/51067/79590/65005/64969/93587/57038/92170/740/54148/55005/51001…	113
GO:0010498	proteasomal protein catabolic process	304/6497	472/17949	1.97261e-36	2.09064e-33	1.52652e-33	10399/6613/7314/5094/7184/1499/3326/6233/29997/7316/1642/6135/3309/8473/6500/5708/1452/3304/6386/25820/64844/7311/7415/1454/5693/10273/7917/207/5566/201595/5714/983/5695/9491/10769/11315/57805/79718/11065/27338/10956/51322/1191/7323/5709/23321/51035/26268/3303/9232/54431/5887/857/9112/55968/8554/81502/1017/329/7327/11345/5688/891/7328/8450/5694/6599/51528/57092/8078/5702/8881/51343/9810/6477/6782…	304			GO:0032543	mitochondrial translation	93/4513	135/16916	1.13583e-24	8.85945e-22	7.54727e-22	55173/84545/60488/64951/55699/29093/84273/4528/51650/55168/8846/124454/51073/2617/64983/708/51264/51258/54516/10884/23107/11222/9801/51253/64960/387338/55157/22868/63931/9617/219402/51116/10102/79072/6183/64981/55278/51318/26284/7818/92259/65080/64965/57129/54534/29088/10128/51067/79590/65005/64969/57038/92170/740/54148/55005/51001/115416/285367/63875/124995/51023/84881/26995/3396/85476/65008/303…	93
GO:0006403	RNA localization	172/6497	228/17949	6.5142e-34	4.60265e-31	3.36072e-31	3178/6428/6427/2091/3181/3192/7919/7514/6426/6421/10657/5901/6209/1660/220988/677/6430/9877/8683/8570/7203/10576/6431/84271/10921/11338/9444/4869/65110/10644/9908/9295/7175/11052/6950/10189/10250/51637/9804/91746/9793/1984/3692/7528/6059/6311/9939/10856/57187/84321/10574/10694/23039/8106/9284/1977/10128/9887/5394/22948/23279/6396/81608/9688/53371/9775/8086/10575/51068/57510/4641/6741/10643/55421/…	172			GO:0010498	proteasomal protein catabolic process	226/4513	472/16916	1.46244e-23	1.01396e-20	8.6378e-21	2729/54467/996/26224/5689/29954/54476/5704/9604/23376/8554/8452/23274/5685/1161/51528/5601/29945/8454/8975/6047/23198/27248/4734/7353/6400/55743/51009/54431/7319/369/27074/3093/83737/29843/9817/5663/4779/2932/5705/55741/55968/117584/8697/5714/84861/5706/5684/5700/5693/80344/5687/5688/57761/81502/9097/9683/5713/51283/9810/55284/7993/5516/55101/2931/5683/10952/54926/10613/8453/27338/5709/57003/5717…	226
GO:0008380	RNA splicing	293/6497	461/17949	1.33466e-33	8.48709e-31	6.19703e-31	3178/26986/10521/4841/5094/51747/5518/3312/3187/3190/23450/6428/6427/3181/27316/7009/3192/10181/7919/5936/7072/3184/10992/10594/6426/7536/4904/3191/6421/10657/6434/1660/220988/6430/1665/23543/10236/10291/11100/23028/1153/6625/8683/5935/8570/10625/6632/6431/10772/5411/5430/5515/1207/4670/10921/11051/11338/9444/22985/6651/23020/5725/10914/1655/9584/9295/23350/55660/23524/79026/10492/11325/6633/2521…	293			GO:0007059	chromosome segregation	164/4513	312/16916	1.19567e-22	7.46095e-20	6.35591e-20	996/292/9918/672/10460/8452/54908/79142/7175/29945/55781/55706/23063/1459/9319/8243/79023/10615/7155/25978/81929/9183/332/24137/990/8697/6732/84861/7290/1457/128866/8780/8260/56271/8766/10270/898/9126/3837/64151/26271/7272/3550/9555/1894/150465/10096/991/4751/1063/9928/9525/348995/23397/80218/23244/11130/64105/55355/8239/3834/8678/9787/56984/54617/90417/151648/5119/7283/7153/5901/27183/891/55207/…	164
GO:0072599	establishment of protein localization to endoplasmic reticulum	106/6497	119/17949	2.50308e-33	1.32642e-30	9.68516e-31	6176/6122/6187/6208/6134/6193/6188/6132/6189/9045/6203/6223/4736/6175/6181/6202/6158/23521/6130/6124/6125/25873/6128/6168/6159/6138/6129/6233/6222/6137/6141/6191/6142/6154/6228/6167/6135/6206/6218/6139/3309/6205/6209/9349/6157/3921/6194/6136/6234/6165/6224/6229/6171/6204/6726/7095/6235/7311/6731/6727/6161/6201/6160/6147/6210/6170/6232/6230/6156/6155/6173/6207/6146/6143/6164/6152/6144/6217/6169/67…	106			GO:0000070	mitotic sister chromatid segregation	96/4513	150/16916	8.3746e-22	4.28835e-19	3.6532e-19	996/9918/10460/8452/54908/79142/7175/29945/55781/9319/8243/10615/25978/81929/9183/24137/990/8697/84861/7290/128866/8260/8766/10270/3837/64151/26271/7272/3550/9555/991/4751/1063/9928/9525/23397/80218/23244/11130/64105/3834/8678/9787/56984/54617/90417/151648/5119/7283/5901/27183/891/55143/324/9700/84101/10592/55755/79075/9493/1062/11004/83540/129563/51143/91272/113130/91782/3619/79980/7273/286053/7…	96
GO:0051169	nuclear transport	233/6497	344/17949	4.25437e-33	2.08104e-30	1.51952e-30	3178/811/10155/7531/6428/6427/3181/7919/7514/5936/6426/10657/11331/5901/6209/9349/1660/3837/6430/8125/754/9877/8683/6632/2316/3838/6431/84271/10921/11338/4869/3843/65110/5594/9295/7175/207/5566/11052/5501/6633/10189/10250/11168/9221/91746/23435/11315/1984/3692/4659/6635/6059/6634/9939/57187/84321/5295/55705/8720/23039/51366/3313/8106/3842/1977/9887/6628/23279/6396/55198/81608/3159/9688/53371/5296…	233			GO:0071826	ribonucleoprotein complex subunit organization	134/4513	248/16916	4.0283e-20	1.57104e-17	1.33835e-17	11171/10659/51154/1975/11218/1659/54475/1207/9733/1653/29093/25929/26747/8668/4528/55239/6128/6175/8487/6732/10291/24144/51386/8664/10419/1983/24148/51340/8669/79752/3646/8662/7458/8661/708/27339/4839/57472/55299/79084/54680/387338/22868/8161/219402/51116/6125/27161/6631/6204/23019/6633/6628/8894/1968/56342/25980/84231/22907/26284/51388/1965/192670/6733/1660/4686/96764/51187/9908/6636/6895/8562/7…	134
GO:1901987	regulation of cell cycle phase transition	291/6497	465/17949	1.21026e-31	4.27559e-29	3.12191e-29	203068/5518/351/7846/7531/1778/8655/29997/989/1642/1781/6154/1019/3320/11331/3275/3398/6500/677/10106/5708/7756/5885/493/29883/10383/9555/6604/4869/5591/1454/5693/5087/4848/328/7175/8766/207/5566/3276/1981/5714/983/5695/9491/1654/9793/10769/5048/23019/5728/25959/10142/11065/5108/9702/5709/5325/10540/2033/55904/894/595/1639/1017/7532/5688/6659/3550/1112/1063/891/5962/8450/5694/58190/9735/7465/1107…	291			GO:0022618	ribonucleoprotein complex assembly	126/4513	234/16916	7.78008e-19	2.55514e-16	2.1767e-16	11171/10659/51154/1975/11218/54475/1207/9733/1653/29093/25929/26747/8668/55239/6128/6175/8487/6732/10291/51386/8664/10419/1983/24148/51340/8669/3646/8662/7458/8661/708/27339/4839/57472/55299/79084/54680/387338/22868/8161/51116/6125/27161/6631/6204/23019/6633/6628/8894/1968/56342/25980/84231/22907/26284/51388/1965/192670/6733/1660/4686/96764/51187/9908/6636/6895/8562/79631/10907/79760/6637/5433/55…	126
[truncated: 11 more rows]
