# Supplementary material for: Shifting epigenetic contexts influence regulatory variation and disease risk
Source: Aging (Albany NY). 2021 Jun 16;13(12):15699–749. doi: 10.18632/aging.203194 (PMC8266365; doi:10.18632/aging.203194)
Supplement: Supplementary Table 3 [file aging-13-203194-s005.xls]

## Sheet: phyloP20ways
Supplementary Table 3. Evolutionary Sequence Analyses.
Set Comparisons
Region Set A	Region Set B	Adjusted p-value	Median Set A	Median Set B	Median Difference
FETAL-BIASED	OLD-BIASED	0	0.128733	0.00999667	0.118736
FETAL-BIASED	ADULT-BIASED	0	0.128733	0.00392	0.124813
FETAL-BIASED	YOUNG-BIASED	3.27294e-264	0.128733	0.109747	0.018986
OLD-BIASED	ADULT-BIASED	4.20049e-45	0.00999667	0.00392	0.00607667
OLD-BIASED	YOUNG-BIASED	0	0.00999667	0.109747	-0.0997503
ADULT-BIASED	YOUNG-BIASED	0	0.00392	0.109747	-0.105827
Control Set Comparisons
Developmentally-Altered Regions
T-statistic	T-test p-value	Alternative Hypothesis (with respect to A vs. B)	Average Set A	Average Set B	Comparison
234.688	0	greater	0.168111	0.0335942	FETAL-BIASED_v_NOCHANGE
-64.4415	0	less	0.00796296	0.0335942	ADULT-BIASED_v_NOCHANGE
296.197	0	greater	0.168111	0.00796296	FETAL-BIASED_v_ADULT-BIASED
Age-Altered Regions
T-statistic	T-test p-value	Alternative Hypothesis (with respect to A vs. B)	Average Set A	Average Set B	Comparison
80.6063	0	greater	0.13504	0.0669237	YOUNG-BIASED_vs_NOCHANGE
-110.753	0	less	0.00942393	0.0669237	OLD-BIASED_vs_NOCHANGE
141.391	0	greater	0.13504	0.00942393	YOUNG-BIASED_vs_OLD-BIASED
Describes the results of evolutionary sequence analyses, both between- and within-species, performed on sets of differentially-accessible regions outlined in Results and Table S1. Sheet 1 – “phyloP20ways”: Comparing distributions of per-region-averaged phyloP20ways scores across different region sets. (Top) – Wilcoxon test results. (Bottom) – Student’s t-test results. See Supplemental Methods. Sh…

## Sheet: Divergent Sequence Set
chr	start	end	source
chr1	2828013	2828085	Pollard_2018_human_sel
chr1	2928620	2929080	Gittelman
chr1	3089754	3089889	Pollard
chr1	3285380	3285535	Gittelman
chr1	7310705	7310825	Prabhakar:512
chr1	7651264	7651536	Bird
chr1	8060033	8060380	Bird
chr1	10588930	10589267	Bird
chr1	10773091	10773533	Prabhakar:978
chr1	11507933	11508064	Prabhakar:735
chr1	19668300	19668935	Gittelman
chr1	19688085	19688655	Bird*Gittelman
chr1	20713360	20713539	Bird
chr1	27309617	27309945	Bird
chr1	30822827	30822972	Bird
chr1	31267948	31268008	Pollard_2018_human_sel
chr1	35087404	35087631	Bird
chr1	37392819	37393061	Bird
chr1	38445273	38445621	Bird
chr1	38454639	38454995	Bird
chr1	39152405	39152538	Pollard_2018_human_bgc
chr1	42166820	42167010	Gittelman
chr1	43279007	43279219	Bird
chr1	44485147	44485404	Bird
chr1	44739746	44740228	Pollard_2018_human_sel
chr1	44832492	44832773	Pollard_2018_human_sel
chr1	44902152	44902427	Bird
chr1	45097595	45097759	Bird
chr1	48965147	48965550	Bird
chr1	49082760	49082910	Gittelman
chr1	49126342	49126559	Bush
chr1	49353843	49353960	Pollard
chr1	49481951	49482115	Prabhakar:236
chr1	51078130	51078331	Prabhakar:520
chr1	51162457	51162883	Bird
chr1	54725380	54725670	Gittelman
chr1	56204189	56204491	Bird
chr1	57184940	57185130	Gittelman
chr1	57647053	57647234	Bird
chr1	57719454	57719857	Bird
chr1	58066513	58066615	Pollard
chr1	58069320	58069593	Bird
chr1	58124925	58125112	Bird
chr1	61221943	61222077	Bush
chr1	61449385	61449489	Pollard
chr1	61637623	61637898	Bird
chr1	61710908	61711108	Prabhakar:748
chr1	61762704	61763185	Bird
chr1	61989781	61990098	Bird
chr1	63464549	63465539	Bird
chr1	63553532	63553789	Prabhakar:635
chr1	64254385	64254693	Bird
chr1	64590698	64591196	Prabhakar:354
chr1	65015854	65016150	Prabhakar:737
chr1	65543192	65543318	Bird
chr1	69610093	69610318	Pollard_2018_human_sel
chr1	70080277	70080410	Prabhakar:143
chr1	71184680	71185270	Gittelman
chr1	71662614	71663043	Bird
chr1	72253981	72254260	Bird
chr1	72879558	72879884	Bird
chr1	74534555	74534670	Bird
chr1	75160269	75160478	Bird
chr1	75376973	75377151	Prabhakar:932
chr1	79486285	79486624	Bird
chr1	79659180	79659440	Gittelman
chr1	79720566	79720645	Pollard_2018_human_bgc
chr1	80311227	80311279	Pollard_2018_human_sel
chr1	80919103	80919231	Bird
chr1	81011420	81011570	Gittelman
chr1	81283699	81283902	Prabhakar:483
chr1	81373873	81373993	Prabhakar:543
chr1	81494086	81494421	Prabhakar:703
chr1	81669024	81669153	Bird
chr1	81741944	81742111	Pollard_2018_human_sel
chr1	82064452	82064819	Prabhakar:571
chr1	82270209	82270343	Bush
chr1	82497621	82497755	Bird
chr1	83220898	83221267	Pollard_2018_human_sel
chr1	83231086	83231270	Bird
chr1	83451695	83451955	Bird*Pollard_2018_human_sel
chr1	83871362	83871911	Bird
chr1	83969385	83969759	Bird
chr1	84211470	84211971	Bird
chr1	87718160	87718430	Gittelman
chr1	87835463	87835856	Bird*Gittelman
chr1	88075879	88076121	Prabhakar:51
chr1	88180686	88181536	Pollard_2018_human_sel
chr1	88261640	88261890	Gittelman
chr1	88285958	88286718	Bird*Prabhakar:893
chr1	88393079	88393389	Prabhakar:572*Gittelman
chr1	88536746	88536889	Pollard
chr1	88624258	88624624	Bird
chr1	88645430	88645630	Pollard
chr1	88801903	88802463	Pollard_2018_human_bgc
chr1	88927378	88928363	Bird
chr1	88952731	88952921	Prabhakar:41
chr1	91286398	91286754	Bird*Gittelman
chr1	95579489	95579895	Bush
chr1	95732748	95732962	Bird
chr1	95746874	95747329	Prabhakar:297*Bird*Pollard_2018_human_sel
chr1	96399440	96399879	Bird
chr1	96960769	96961029	Bird
chr1	97391566	97392094	Prabhakar:624
chr1	97463380	97463624	Gittelman*Bird
chr1	98623229	98623400	Prabhakar:537
chr1	98916143	98916313	Pollard_2018_human_sel
chr1	99380320	99380491	Pollard_2018_human_bgc
chr1	101490453	101490621	Bird
chr1	101490800	101491270	Gittelman
chr1	101620918	101621057	Prabhakar:107*Bird
chr1	102133323	102133549	Prabhakar:663
chr1	102540132	102540261	Bird
chr1	103345220	103345450	Gittelman
chr1	104820733	104820841	Pollard
chr1	105537114	105537278	Bird
chr1	106895326	106895640	Prabhakar:824*Pollard_2018_human_sel
chr1	107219174	107219474	Bird
chr1	107291285	107291490	Gittelman
chr1	107292620	107292910	Gittelman
chr1	108225700	108226070	Gittelman
chr1	109260560	109260850	Gittelman
chr1	113811840	113811990	Gittelman
chr1	116854360	116854940	Gittelman*Prabhakar:10*Bird*Pollard_2018_human_sel
chr1	119260771	119260851	Pollard_2018_human_bgc
chr1	119675658	119675931	Bird
chr1	119851209	119851286	Pollard_2018_human_sel
chr1	120139471	120139726	Bird
chr1	144340516	144340754	Bird
chr1	144520764	144521012	Bird
chr1	146126727	146127077	Bird
chr1	146136363	146136465	Bird
chr1	146139587	146139754	Bird
chr1	146149884	146150231	Bird
chr1	146150270	146150718	Bird
chr1	146512854	146513020	Bird
chr1	147691716	147692063	Bird
chr1	147692102	147692550	Bird
chr1	149576471	149576706	Bird
chr1	157694098	157694333	Bird
chr1	158145111	158145257	Bird
chr1	162616862	162617119	Bush
chr1	163207616	163207928	Bird
chr1	163534095	163534315	Prabhakar:29
chr1	164350238	164350495	Bird*Pollard
chr1	170612084	170612280	Bird
chr1	170717505	170717867	Bird
chr1	172193556	172193835	Bird
chr1	175173420	175173770	Gittelman
chr1	175535112	175535518	Prabhakar:162
chr1	175704682	175704908	Bird*Prabhakar:87
chr1	175722739	175722898	Bird
chr1	176663120	176663435	Gittelman
chr1	176906286	176906398	Pollard_2018_human_sel
chr1	177009234	177009502	Prabhakar:243*Bird
chr1	177087437	177087640	Prabhakar:296*Bird
chr1	177332795	177332989	Pollard
chr1	177580823	177581149	Bird
chr1	177864916	177865481	Prabhakar:702
chr1	178363595	178363891	Bird
chr1	180579799	180579859	Pollard_2018_human_sel
chr1	181777911	181778155	Prabhakar:568
chr1	183746320	183746470	Gittelman
chr1	183820000	183820490	Gittelman
chr1	188602203	188602416	Prabhakar:608
chr1	192111617	192111727	Bird
chr1	194307560	194308050	Gittelman
chr1	194534287	194534501	Prabhakar:380
chr1	195873029	195873226	Bird
chr1	198529520	198529614	Pollard_2018_human_sel
chr1	200284035	200284638	Bird
chr1	200438420	200438690	Gittelman
chr1	202251720	202251990	Gittelman
chr1	202664608	202664793	Bird
chr1	203336280	203336530	Gittelman
chr1	204591529	204591699	Prabhakar:49
chr1	204900579	204900750	Prabhakar:185
chr1	208608186	208608637	Prabhakar:887
chr1	208941241	208941707	Bird
chr1	209630840	209631070	Gittelman
chr1	209734795	209735123	Prabhakar:946
chr1	209989200	209989690	Gittelman
chr1	210436018	210436248	Bird
chr1	212253113	212253453	Bird
chr1	213759461	213759974	Bird
chr1	214102710	214102882	Prabhakar:878
chr1	214202295	214202547	Bird
chr1	214549280	214549570	Gittelman
chr1	215846403	215846591	Prabhakar:425
chr1	216091245	216091421	Bush
chr1	216356754	216357348	Bird*Prabhakar:798*Gittelman
chr1	216885960	216886546	Bird
chr1	217138105	217138347	Pollard
chr1	217227958	217228105	Bird
chr1	217633637	217633841	Bird
chr1	217944112	217944690	Prabhakar:194*Pollard
chr1	218030542	218030819	Bird
chr1	218392866	218393180	Bird
chr1	218428301	218428846	Bird
chr1	223059740	223060440	Gittelman
chr1	228288030	228288336	Bird
chr1	228636832	228637153	Bird
chr1	231674967	231675300	Bird
chr1	232170400	232170630	Gittelman
chr1	234162231	234162343	Bird
chr1	237207560	237207935	Gittelman*Prabhakar:383
chr1	238497460	238497710	Gittelman
chr1	243216422	243216810	Bird
chr1	243364665	243364776	Bird
chr1	244200840	244200990	Gittelman
chr1	245320617	245320734	Prabhakar:443
chr1	245389034	245389269	Prabhakar:287
chr1	245851420	245851950	Gittelman
chr1	246230840	246231550	Gittelman
chr1	247348197	247348325	Bird
chr10	234780	235210	Gittelman*Bird
chr10	1709764	1709899	Bird
chr10	2117487	2117687	Bird
chr10	3324160	3324450	Gittelman
chr10	4320380	4320750	Gittelman
chr10	4764160	4764570	Gittelman
chr10	6772058	6772220	Bird
chr10	6899801	6899948	Bird
chr10	6930626	6930779	Bird
chr10	7114637	7114789	Bird
chr10	7261978	7262269	Prabhakar:986
chr10	8164895	8165324	Bird
chr10	8401953	8402142	Prabhakar:889
chr10	8546534	8547054	Bird*Pollard_2018_human_sel
chr10	8576089	8576521	Pollard_2018_human_sel*Bird
chr10	8586540	8587060	Bush
chr10	8616153	8616527	Bush
chr10	8794120	8794270	Gittelman
chr10	9241847	9242596	Prabhakar:199
chr10	10085012	10085245	Bird
chr10	10372661	10372817	Prabhakar:542
chr10	10474238	10474501	Prabhakar:306*Pollard
chr10	10886858	10887143	Bird
chr10	11028977	11029056	Pollard_2018_human_sel
chr10	11077660	11078049	Gittelman*Prabhakar:507
chr10	14144800	14145010	Gittelman*Prabhakar:25
chr10	14233546	14233781	Bird
chr10	14765321	14765670	Bird
chr10	16500290	16500553	Prabhakar:987
chr10	16654584	16654741	Pollard
chr10	16705307	16705524	Prabhakar:261*Pollard_2018_human_sel
chr10	16745455	16745520	Bush
chr10	17560564	17560822	Bird
chr10	20999099	20999307	Bird
chr10	21757708	21758350	Bird
chr10	24642360	24642590	Gittelman
chr10	25017474	25017627	Prabhakar:449
chr10	28552440	28552755	Gittelman
chr10	30650018	30650246	Bird
chr10	33321794	33321974	Prabhakar:637
chr10	33735040	33735190	Gittelman
chr10	34217609	34217783	Prabhakar:148*Bird*Pollard_2018_human_sel
chr10	36238420	36239039	Bird
chr10	38475482	38475729	Bird
chr10	45586399	45586527	Bird
chr10	48557700	48558350	Gittelman
chr10	51117657	51118044	Bird
chr10	63097900	63098298	Prabhakar:583
chr10	64142575	64142747	Prabhakar:154*Bird
chr10	68947956	68948176	Bird
chr10	69216076	69216302	Prabhakar:942
chr10	70010900	70011355	Gittelman
chr10	70013312	70013568	Bird
chr10	73113680	73113870	Gittelman
chr10	73409021	73409144	Prabhakar:224
chr10	75208690	75208798	Bird
chr10	77185788	77185984	Bird
chr10	77438166	77438608	Prabhakar:617*Bird
chr10	77483346	77484229	Bird
chr10	77499545	77499875	Gittelman
chr10	77549472	77549614	Prabhakar:804
chr10	77781106	77781470	Bird
chr10	77809800	77810195	Gittelman
chr10	77814087	77814528	Prabhakar:670
chr10	78010380	78010950	Gittelman
chr10	78874300	78874535	Gittelman
chr10	80093651	80093740	Bush
chr10	80334147	80334450	Prabhakar:480
chr10	80423600	80423770	Gittelman
chr10	83951776	83952132	Prabhakar:463
chr10	87306056	87306283	Bird
chr10	87769069	87769278	Prabhakar:843
chr10	92401913	92402099	Bird
chr10	94549772	94549905	Prabhakar:342
chr10	95102739	95102959	Prabhakar:953
chr10	97948774	97949551	Bird
chr10	98381190	98381361	Bird
chr10	99776541	99776630	Pollard_2018_human_sel
chr10	100605545	100605708	Prabhakar:781
chr10	103726653	103726763	Bird
chr10	106334209	106334741	Prabhakar:309
chr10	106742088	106742276	Prabhakar:203
chr10	107100364	107100665	Prabhakar:59
chr10	108527757	108528057	Prabhakar:849*Pollard_2018_human_sel
chr10	108787280	108787430	Gittelman
chr10	108809368	108809595	Bird*Prabhakar:5
chr10	109431580	109431970	Gittelman
chr10	114345620	114346070	Gittelman*Bird
chr10	115059144	115059319	Bird
chr10	115312248	115312312	Prabhakar:31
chr10	116675130	116675470	Pollard_2018_human_bgc*Gittelman
chr10	117636353	117636594	Bird
chr10	117775221	117775327	Prabhakar:558
chr10	117873800	117874030	Gittelman
chr10	119354320	119354570	Gittelman*Pollard_2018_human_sel
chr10	119507599	119507830	Pollard_2018_human_sel*Prabhakar:278*Bird
chr10	119803249	119803548	Bird
chr10	120127697	120128094	Bush
chr10	120137734	120138097	Prabhakar:337
chr10	120175321	120175525	Bird
chr10	120181277	120182137	Pollard_2018_human_sel
chr10	122169782	122170099	Prabhakar:289
chr10	122945673	122946002	Bird*Gittelman*Pollard_2018_human_sel
chr10	122948084	122948306	Prabhakar:212
chr10	123064660	123064910	Gittelman
chr10	123072640	123072930	Gittelman
chr10	123268680	123268930	Gittelman
chr10	123914220	123914600	Gittelman
chr10	125156057	125156397	Bird
chr10	125273687	125273852	Bird
chr10	126812845	126812995	Gittelman
chr10	127180076	127180414	Bush
chr10	127190180	127190350	Gittelman
chr10	128956040	128956455	Gittelman
chr10	130774152	130774364	Prabhakar:850
chr10	130844170	130844412	Pollard*Pollard_2018_human_bgc*Bird
chr10	130970067	130970425	Prabhakar:8*Bird
chr10	130982058	130982281	Bird
chr10	131129435	131129501	Pollard_2018_human_sel
chr10	131232877	131233072	Prabhakar:271*Bird
chr10	131560944	131561518	Bird
chr10	131754168	131754688	Bird
chr10	132615380	132615630	Gittelman
chr10	134471350	134472057	Prabhakar:475
chr11	508178	508761	Bird
chr11	2646010	2646863	Bird
chr11	3853076	3853272	Prabhakar:769
chr11	7435936	7436272	Prabhakar:540
chr11	8337521	8337800	Prabhakar:364
chr11	8378650	8378866	Bird*Pollard
chr11	8383717	8384194	Prabhakar:147*Pollard_2018_human_sel
chr11	10342686	10343041	Bird
chr11	10397659	10397740	Pollard_2018_human_sel
chr11	10625947	10626132	Pollard_2018_human_bgc
chr11	11231886	11232144	Pollard_2018_human_bgc
chr11	12351420	12351650	Gittelman
chr11	13846797	13846891	Pollard_2018_human_sel
chr11	14128627	14129007	Bird
chr11	15522865	15523490	Bird
chr11	15561260	15561470	Gittelman
chr11	16133871	16134319	Bird
chr11	16191520	16191870	Gittelman
chr11	16423720	16424159	Bird
chr11	17786920	17787230	Gittelman
chr11	19806909	19807205	Bird*Prabhakar:684
chr11	19902800	19902990	Gittelman
chr11	22492991	22493295	Bird
chr11	22513317	22513656	Bird
chr11	28139147	28139520	Bird
chr11	28597497	28597787	Prabhakar:498
chr11	30592899	30592954	Pollard_2018_human_sel
chr11	30718513	30718672	Prabhakar:144*Bird
chr11	30741300	30741499	Prabhakar:938
chr11	30952349	30952670	Prabhakar:648*Gittelman
chr11	31268253	31268629	Bird
chr11	31623260	31623710	Gittelman
chr11	31686452	31686846	Bird
chr11	31893460	31893930	Gittelman
chr11	31993775	31993909	Bush
chr11	32037169	32037335	Pollard_2018_human_sel*Bird
chr11	32128760	32129195	Bird
chr11	33928249	33928741	Prabhakar:860
chr11	34732262	34732675	Bird
chr11	34764291	34764409	Bird
chr11	35644714	35644994	Prabhakar:503
chr11	35896200	35896534	Bird
chr11	36101849	36101983	Bird
chr11	37018052	37018362	Prabhakar:688
chr11	38536109	38536301	Bird
chr11	39575869	39576030	Prabhakar:331*Bird
chr11	40715404	40715606	Prabhakar:522
chr11	41469701	41469793	Pollard_2018_human_sel
chr11	42071022	42071245	Prabhakar:606
chr11	42103800	42104190	Gittelman
chr11	42576008	42576123	Bird
chr11	42618379	42618711	Bird
chr11	44436409	44436909	Bird
chr11	47043193	47043420	Pollard*Prabhakar:245
chr11	47091837	47091966	Prabhakar:758
chr11	49339511	49339657	Bird
chr11	49598205	49598463	Bird
chr11	50114819	50114945	Bird
chr11	56118895	56119339	Bird
chr11	63924912	63925246	Prabhakar:283
chr11	74630631	74631010	Bird
chr11	79016077	79016313	Bush
chr11	79171622	79171772	Prabhakar:301
chr11	79338429	79338665	Bird
chr11	79721862	79722219	Prabhakar:733*Pollard
chr11	79786055	79786290	Prabhakar:233
chr11	80532243	80532449	Prabhakar:729
chr11	81018201	81018406	Bird
chr11	83420525	83422950	gainOverHACNE*Prabhakar:746
chr11	86299520	86299880	Gittelman
chr11	87015480	87015850	Gittelman
chr11	87462477	87462729	Bird
chr11	88908980	88909310	Gittelman
chr11	89231856	89232323	Bird
chr11	91579774	91580037	Prabhakar:774
chr11	91820763	91820878	Pollard_2018_human_sel
chr11	92340691	92340857	Bird
chr11	95015617	95015966	Bird
chr11	96028302	96028500	Bird
chr11	96831551	96831919	Prabhakar:721*Bird
chr11	97457165	97457523	Bird
chr11	98524353	98524656	Bird
chr11	100447375	100447660	Prabhakar:775
chr11	103151280	103151430	Gittelman
chr11	103924820	103925070	Gittelman
chr11	107364840	107365090	Gittelman
chr11	109297851	109298156	Bird
chr11	109403875	109404155	Prabhakar:759*Bird
chr11	110951765	110952083	Prabhakar:790
chr11	111309790	111309991	Prabhakar:491
chr11	112781754	112782166	Bird
chr11	112944247	112944430	Prabhakar:872
chr11	113604974	113605397	Bush
chr11	113936620	113937250	Gittelman
chr11	113985980	113986695	Gittelman
chr11	114014953	114015219	Bird
chr11	114099701	114100229	Pollard_2018_human_bgc*Bird*Pollard*Gittelman
chr11	114799193	114799383	Pollard
chr11	115086734	115086933	Prabhakar:249
chr11	115155689	115155898	Prabhakar:698
chr11	115214219	115214401	Bird
chr11	115350216	115350506	Bird
chr11	115563356	115563482	Pollard
chr11	115648182	115648522	Prabhakar:548
chr11	115915700	115915910	Gittelman
chr11	115924312	115924542	Pollard
chr11	116045070	116045256	Bird
chr11	116431419	116431595	Pollard
chr11	117333214	117333583	Prabhakar:459*Pollard
chr11	119547415	119547563	Prabhakar:467
chr11	119851124	119851295	Prabhakar:858
chr11	120640761	120641144	Prabhakar:74
chr11	121801206	121801409	Pollard_2018_human_sel*Bird
chr11	124527693	124527929	Pollard_2018_human_sel
chr11	124616780	124617190	Gittelman
chr11	125063060	125063290	Gittelman
chr11	126784915	126785177	Bird
chr11	127013462	127013655	Prabhakar:15
chr11	127064075	127064309	Prabhakar:123
chr11	128346624	128346977	Prabhakar:335*Pollard_2018_human_bgc
chr11	129274665	129274908	Bird*Pollard_2018_human_sel
chr11	130965377	130965778	Bird*Pollard_2018_human_bgc*Prabhakar:28*Pollard
chr11	131265490	131265637	Pollard
chr11	131522841	131522905	Pollard_2018_human_sel
chr11	131667531	131668061	Prabhakar:839*Bird*Bird
chr11	131681355	131681825	Bird
chr11	131683867	131684292	Prabhakar:927
chr11	131807077	131807265	Pollard_2018_human_bgc
chr11	131838867	131838955	Pollard_2018_human_sel
chr11	131852583	131852790	Prabhakar:58*Gittelman
chr11	131948475	131948847	Prabhakar:69
chr11	132765961	132766134	Bush
chr11	132809661	132809996	Prabhakar:63*Bird*Pollard_2018_human_sel
chr11	133005776	133005839	Pollard_2018_human_bgc
chr11	133142808	133142933	Prabhakar:304
chr11	133533771	133533927	Prabhakar:497*Pollard_2018_human_bgc
chr11	133810891	133811164	Bird
chr12	974172	974590	Pollard_2018_human_sel*Bird*Pollard*Prabhakar:7
chr12	999608	999685	Pollard_2018_human_sel
chr12	1157465	1157770	Gittelman
chr12	3117146	3117286	Bush
chr12	3246874	3247040	Prabhakar:105*Bird*Pollard_2018_human_sel
chr12	3600714	3600902	Pollard_2018_human_bgc
chr12	9961715	9961877	Bird
chr12	12472949	12473205	Bird
chr12	12735910	12736239	Pollard_2018_human_bgc*Prabhakar:20*Bird
chr12	13939816	13939908	Pollard_2018_human_bgc
chr12	14047086	14047404	Bird
chr12	16125151	16125330	Bird
chr12	16236954	16237124	Bird*Prabhakar:79
chr12	16704985	16705168	Prabhakar:121
chr12	16859733	16860030	Prabhakar:866
chr12	17290464	17290740	Bird*Pollard_2018_human_sel
chr12	17583262	17583696	Bird
chr12	17848217	17849129	Pollard_2018_human_bgc
chr12	17939223	17939533	Prabhakar:66
chr12	18630567	18630740	Pollard_2018_human_sel
chr12	18694240	18694390	Gittelman
chr12	19461372	19461698	Bird
chr12	23138955	23139506	Bird
chr12	23146450	23147449	Pollard_2018_human_sel
chr12	23343161	23344184	Bird
chr12	23908567	23909160	Pollard_2018_human_bgc
chr12	24034426	24034805	Bird
chr12	24169314	24169572	Prabhakar:610
chr12	24382927	24383437	Bird*Pollard_2018_human_sel
chr12	24392352	24392660	Prabhakar:717
chr12	31030298	31030498	Bird
chr12	33947563	33947848	Bird
chr12	41981597	41981748	Bird
chr12	42219775	42219988	Prabhakar:629
chr12	43150800	43151235	Gittelman
chr12	43390585	43390843	Bird
chr12	43585774	43585921	Prabhakar:321
chr12	45188653	45188948	Bird
chr12	48152928	48153096	Bird
chr12	54197067	54197251	Prabhakar:694
chr12	54340154	54340275	Pollard_2018_human_sel
chr12	59287770	59288001	Pollard_2018_human_bgc
chr12	60916499	60916754	Prabhakar:660*Pollard
chr12	61426448	61426567	Pollard
chr12	64790517	64790717	Bird
chr12	65297600	65297870	Gittelman
chr12	67451529	67451704	Prabhakar:499
chr12	68286895	68287072	Prabhakar:129
chr12	69351136	69351440	Bird
chr12	72374304	72374657	Bird
chr12	72396925	72397242	Bird
chr12	72477181	72477574	Pollard_2018_human_sel
chr12	72542091	72542227	Prabhakar:569
chr12	72611429	72611630	Prabhakar:817
chr12	72627909	72628195	Bird
chr12	72816138	72816382	Prabhakar:678
chr12	72966190	72966441	Prabhakar:536
chr12	73486258	73486351	Pollard_2018_human_sel
chr12	73671701	73671911	Bird
chr12	73871209	73871332	Pollard_2018_human_sel
chr12	77343368	77343511	Prabhakar:111
chr12	78240800	78241080	Gittelman
chr12	79462003	79462308	Prabhakar:640
chr12	79559080	79559230	Gittelman
chr12	79620666	79620977	Prabhakar:910
chr12	84313001	84313260	Bird
chr12	86726799	86727040	Prabhakar:921
chr12	86984560	86984795	Bird
chr12	87612769	87613182	Pollard_2018_human_sel
chr12	87730332	87730503	Pollard_2018_human_sel
chr12	89743565	89743941	Prabhakar:240
chr12	90460124	90460301	Bird
chr12	91997535	91997881	Bird
chr12	92191318	92191689	Bird
chr12	92562152	92562604	Bird
chr12	92788500	92788870	Gittelman
chr12	94928969	94929082	Pollard*Bird
chr12	96384165	96384322	Pollard_2018_human_bgc
chr12	97363557	97363753	Prabhakar:973
chr12	97507506	97507651	Bird
chr12	97553225	97553530	Gittelman
chr12	97752840	97752990	Gittelman
chr12	97931250	97931685	Pollard_2018_human_bgc*Bird*Gittelman
chr12	98032530	98032602	Pollard_2018_human_bgc
chr12	98126179	98127046	Bird
chr12	99515380	99515710	Gittelman
chr12	99586327	99586523	Pollard_2018_human_sel
chr12	99728061	99728336	Bird
chr12	102029520	102029750	Gittelman
chr12	102850102	102850466	Bird
chr12	102864780	102865030	Gittelman
chr12	108066120	108066350	Gittelman
chr12	108342254	108342429	Prabhakar:685
chr12	108357458	108357653	Bird
chr12	108876280	108876740	Gittelman
chr12	109331031	109331127	Pollard_2018_human_sel
chr12	109692000	109692270	Gittelman
chr12	109796948	109797088	Pollard_2018_human_bgc
chr12	110552150	110554900	gainOverHARs
chr12	110977600	110977870	Gittelman
chr12	113581892	113582270	Bird
chr12	113886802	113887057	Pollard_2018_human_sel
chr12	114317750	114319450	gainOverHACNE*Prabhakar:674
chr12	114467996	114468201	Prabhakar:673
chr12	114845100	114845780	Gittelman
chr12	115299960	115300196	Bird
chr12	119363800	119364010	Prabhakar:318*Bird
chr12	120848336	120848837	Bird
chr12	121956170	121956220	Pollard_2018_human_sel
chr12	128346080	128346410	Gittelman
chr12	130335918	130336042	Prabhakar:577
chr12	130548545	130548710	Gittelman
chr12	130765765	130766030	Gittelman
chr12	133702061	133702445	Bird
chr13	19526878	19527035	Bird
chr13	21522089	21522425	Bird
chr13	22495866	22496061	Bird
chr13	23510780	23511042	Bird
chr13	24928553	24928885	Bird
chr13	27438234	27438405	Bush
chr13	32180033	32180170	Bird
chr13	34493427	34493479	Pollard_2018_human_sel
chr13	34644292	34644527	Bird
chr13	34951368	34951595	Bird
chr13	35270314	35270392	Pollard_2018_human_sel
chr13	37425944	37426092	Bush
chr13	40661399	40661633	Prabhakar:295*Pollard
chr13	42281055	42281163	Bird
chr13	43809281	43809522	Bird
chr13	43889632	43890052	Pollard_2018_human_sel*Bird*Prabhakar:336
chr13	44619366	44619586	Prabhakar:595
chr13	48224440	48224670	Gittelman
chr13	49000892	49001249	Bird
chr13	53499998	53500334	Prabhakar:239
chr13	53718154	53718798	Pollard_2018_human_sel
chr13	53837375	53837633	Bird
chr13	54152600	54153039	Bird
chr13	54399706	54400024	Bird
chr13	56506713	56507012	Bird
chr13	59220092	59220222	Bird
chr13	60084918	60085394	Prabhakar:494
chr13	60439585	60439852	Pollard_2018_human_bgc
chr13	60692168	60692360	Prabhakar:794
chr13	60954640	60954787	Prabhakar:917
chr13	61846763	61847012	Prabhakar:531
chr13	63665795	63666134	Bird
chr13	64221242	64221375	Prabhakar:430
chr13	65031235	65031516	Bird
chr13	66047405	66047618	Prabhakar:406
chr13	66190908	66191217	Bird
chr13	66741100	66741459	Pollard_2018_human_sel
chr13	67009340	67009630	Gittelman
chr13	67092795	67093031	Bush
chr13	67462900	67463330	Gittelman
chr13	67824370	67824587	Prabhakar:745
chr13	68011425	68011710	Bird
chr13	68080424	68080643	Bird
chr13	68194794	68195030	Bird
chr13	69303695	69303993	Prabhakar:104
chr13	69670936	69671071	Pollard
chr13	69948245	69948439	Bird
chr13	70723602	70724181	Bush
chr13	71132964	71133156	Bird
chr13	71533163	71534052	Prabhakar:567
chr13	71723752	71724353	Prabhakar:60*Pollard
chr13	71800535	71800677	Prabhakar:222
chr13	72212291	72213257	Bird
chr13	72373582	72373697	Pollard
chr13	72518566	72519254	Bird*Pollard
chr13	72818601	72819273	Bird
chr13	73085346	73085679	Bird
chr13	73114822	73115533	Bird*Prabhakar:11*Pollard
chr13	74879898	74880324	Bird
chr13	75254027	75254488	Bird
chr13	75411834	75411972	Prabhakar:437
chr13	75540774	75541131	Bird
chr13	76739526	76739737	Prabhakar:645
chr13	77063243	77063740	Pollard_2018_human_sel
chr13	78096179	78096281	Pollard_2018_human_sel
chr13	79121232	79121772	Bird*Pollard_2018_human_bgc
chr13	80422379	80422598	Bird
chr13	82546471	82546786	Prabhakar:313
chr13	84264323	84264479	Bird
chr13	84866794	84867036	Prabhakar:55
chr13	85121663	85122003	Prabhakar:172
chr13	87805708	87805918	Prabhakar:616
chr13	88759783	88759986	Bird
chr13	89833344	89833526	Prabhakar:979
chr13	89935655	89936018	Bush
chr13	91137512	91138025	Prabhakar:841
chr13	91847876	91848164	Bird
chr13	92972675	92972936	Bird*Pollard_2018_human_bgc
chr13	93018891	93018947	Pollard_2018_human_bgc
chr13	93459716	93459913	Prabhakar:472
chr13	94361802	94361949	Prabhakar:329
chr13	94430150	94430396	Prabhakar:533*Pollard
chr13	94459054	94459287	Pollard
chr13	94506194	94506390	Bird
chr13	95480586	95480802	Prabhakar:510*Bird
chr13	95599769	95599947	Prabhakar:643
chr13	95600140	95600795	Bird
chr13	96430966	96431356	Bird
chr13	96978006	96978313	Prabhakar:615
chr13	97207875	97208190	Bird
chr13	97211852	97212282	Prabhakar:367*Bird
chr13	97262883	97263265	Bird*Prabhakar:293
chr13	97274143	97274320	Prabhakar:164
chr13	97319498	97319869	Pollard_2018_human_bgc*Prabhakar:726
chr13	97422090	97422436	Bird
chr13	97461403	97461566	Prabhakar:386
chr13	97496505	97496758	Prabhakar:632*Bird
chr13	97712817	97713125	Bird
chr13	97925656	97925808	Prabhakar:83
chr13	99842842	99843029	Bird
chr13	100395325	100395650	Gittelman
chr13	100578312	100578627	Prabhakar:38
chr13	101126008	101126524	Prabhakar:254*Gittelman
chr13	101537631	101537796	Pollard_2018_human_bgc
chr13	102262351	102262451	Pollard_2018_human_sel
chr13	102373184	102373394	Pollard_2018_human_sel
chr13	103597740	103598051	Prabhakar:604
chr13	103900890	103901280	Bird
chr13	104342386	104342811	Bird
chr13	104796524	104796780	Prabhakar:188
chr13	105086196	105086436	Pollard_2018_human_sel
chr13	105442800	105442950	Gittelman
chr13	105465054	105465196	Bird
chr13	105655822	105656054	Bird
chr13	105669785	105670193	Bird
chr13	106357704	106357819	Pollard
chr13	106774433	106774641	Pollard_2018_human_sel
chr13	106836188	106836335	Bird
chr13	106946998	106947126	Prabhakar:763
chr13	107001720	107002090	Gittelman
chr13	107275480	107275722	Bird
chr13	107591613	107591671	Pollard_2018_human_sel
chr13	110900260	110900755	Gittelman
chr13	112639312	112639479	Prabhakar:396
chr13	115007583	115007762	Pollard_2018_human_sel
chr14	19628689	19628815	Bird
chr14	19684594	19684749	Bird
chr14	19946578	19946704	Bird
chr14	21190384	21191218	Bird
chr14	22989334	22989546	Bird
chr14	23840870	23841006	Prabhakar:528
chr14	24476271	24476413	Bird
chr14	26099041	26099222	Prabhakar:225
chr14	26642930	26643602	Prabhakar:801
chr14	27295002	27295205	Bird
chr14	28309461	28310017	Bird
chr14	28599684	28600477	Prabhakar:167
chr14	29044341	29044669	Bird
chr14	30265195	30265539	Bird
chr14	31880036	31880274	Bird
chr14	32346360	32346890	Gittelman
chr14	33180340	33180630	Gittelman
chr14	33197172	33197384	Bird
chr14	33231133	33231627	Bird
chr14	33417004	33417239	Pollard
chr14	33417751	33418104	Bird*Prabhakar:658
chr14	33488371	33489113	Bird*Prabhakar:490*Pollard
chr14	33496200	33497125	gainOverHACNE*Bird*Prabhakar:553
chr14	33526920	33527130	Gittelman*Pollard
chr14	33649062	33649291	Prabhakar:221
chr14	33687897	33688536	Bird
chr14	33710550	33711235	Bird
chr14	33760859	33760976	Pollard
chr14	33811460	33811810	Gittelman
chr14	33819145	33819460	Prabhakar:96
chr14	34045569	34045772	Pollard
chr14	34048614	34048815	Pollard_2018_human_sel
chr14	34065558	34065810	Pollard
chr14	34080969	34081176	Bird
chr14	34161492	34161808	Bird
chr14	34169525	34169955	Pollard_2018_human_sel
chr14	34179176	34179449	Bird
chr14	34652755	34652982	Prabhakar:780
chr14	36550251	36550390	Bird
chr14	36557506	36557952	Bird
chr14	36677779	36678420	Bush
chr14	37374831	37375087	Bird
chr14	37383857	37384173	Bird
chr14	37503736	37504441	Prabhakar:328
chr14	37539815	37540051	Prabhakar:867
chr14	37608028	37608669	Bird*Pollard_2018_human_sel*Gittelman
chr14	38492512	38492773	Prabhakar:602
chr14	39207332	39207595	Prabhakar:23
chr14	40133125	40133715	Gittelman*Bird
chr14	40375266	40375580	Bird*Prabhakar:890
chr14	40733578	40733766	Bird
chr14	40789727	40789963	Bird
chr14	44695072	44695364	Prabhakar:308
chr14	45034896	45035392	Prabhakar:947
chr14	45837243	45837513	Prabhakar:864
chr14	46268792	46269006	Prabhakar:320
chr14	48143340	48143880	Gittelman
chr14	48843159	48843565	Prabhakar:783*Bird
chr14	48851258	48851467	Bird
chr14	49248228	49248336	Bird
chr14	49439679	49439944	Prabhakar:776
chr14	49761236	49761424	Pollard_2018_human_bgc
chr14	49988758	49988936	Prabhakar:771
chr14	50176970	50177103	Pollard_2018_human_bgc
chr14	52131204	52131269	Pollard_2018_human_bgc
chr14	54008724	54009000	Bird
chr14	54348043	54348390	Bird
chr14	55113560	55113750	Gittelman
chr14	60999240	60999450	Gittelman
chr14	61144825	61145054	Prabhakar:379
chr14	61690190	61690717	Prabhakar:723
chr14	62463589	62463778	Pollard_2018_human_bgc
chr14	64705360	64705795	Gittelman
chr14	66386589	66387181	Prabhakar:207
chr14	66574560	66574886	Prabhakar:389
chr14	66797655	66797852	Prabhakar:605
chr14	66930973	66931221	Prabhakar:951
chr14	68622887	68623012	Bird
chr14	69089620	69089756	Bird
chr14	69172700	69173160	Gittelman
chr14	70102660	70103430	Gittelman
chr14	70319283	70319511	Prabhakar:461
chr14	73430372	73430609	Bird
chr14	73488804	73488958	Prabhakar:269
chr14	74600580	74600770	Gittelman
chr14	76288936	76289401	Bird
chr14	76787274	76787480	Prabhakar:6*Pollard_2018_human_bgc
chr14	78184040	78184190	Gittelman
chr14	78365365	78365515	Gittelman
chr14	79042230	79042431	Prabhakar:914
chr14	79110960	79111116	Prabhakar:493
chr14	79760173	79760406	Bird
chr14	79918523	79918835	Bird
chr14	79959419	79959599	Bird
chr14	80042294	80042550	Prabhakar:253
chr14	80264794	80264974	Prabhakar:950
chr14	81645456	81645581	Bush
chr14	82072143	82072592	Bird
chr14	82128607	82129254	Bird
chr14	82147741	82148057	Prabhakar:544*Bird*Pollard_2018_human_sel
chr14	82158268	82158653	Prabhakar:991
chr14	82447464	82447838	Prabhakar:651
chr14	83327803	83328067	Prabhakar:130
chr14	83550878	83551092	Bird*Pollard_2018_human_bgc
chr14	83595470	83595703	Bird
chr14	83717431	83717516	Pollard_2018_human_sel
chr14	83719502	83719607	Pollard
chr14	85124220	85124670	Gittelman*Prabhakar:462
chr14	88360789	88361061	Prabhakar:178*Bird
chr14	89961414	89961610	Bird
chr14	90040900	90041090	Gittelman
chr14	90216193	90216662	Prabhakar:67
chr14	92764238	92764514	Prabhakar:768
chr14	95660632	95660686	Pollard_2018_human_sel
chr14	97553685	97553796	Bird
chr14	97791682	97791804	Prabhakar:197
chr14	98099540	98099730	Gittelman
chr14	98475772	98476067	Prabhakar:992
chr14	98575088	98575579	Bird
chr14	99071631	99071888	Bird
chr14	99084560	99084932	Prabhakar:450
chr14	99502300	99502660	Gittelman
chr14	99692869	99693036	Bird
chr14	103194302	103194418	Bird
chr14	103707805	103708147	Bird
chr14	104559843	104559942	Pollard_2018_human_sel
chr14	104732791	104732974	Prabhakar:550
chr15	20721491	20721697	Bird
chr15	20876437	20876610	Bird
chr15	20886431	20886563	Bird
chr15	22570713	22570831	Bird
chr15	22777687	22777817	Bird
chr15	22780708	22780875	Bird
chr15	28662067	28662303	Bird
chr15	30857828	30858053	Bird
chr15	31126560	31126698	Bird
chr15	31127126	31127293	Bird
chr15	32862523	32862673	Bird
chr15	33234095	33234291	Bird
chr15	33306860	33307070	Gittelman
chr15	34030260	34030735	Gittelman
chr15	35504139	35504419	Bird
chr15	35666102	35666485	Bird
chr15	35813893	35814650	Bird*Gittelman
chr15	36025879	36026098	Prabhakar:677
chr15	36049431	36049961	Bird
chr15	36263177	36263630	Prabhakar:173
chr15	36391535	36391787	Pollard
chr15	36414289	36414700	Prabhakar:837
chr15	36587220	36587370	Gittelman
chr15	36594472	36594817	Bird
chr15	36722583	36722756	Prabhakar:961
chr15	36738533	36738694	Bird
chr15	36747497	36747696	Pollard_2018_human_sel
chr15	36889022	36889512	Bird
chr15	36913321	36913881	Bird
chr15	36964908	36965898	Bird*Pollard_2018_human_sel
chr15	36967612	36968013	Bird
chr15	37177021	37177166	Prabhakar:486
chr15	37178484	37178557	Pollard_2018_human_bgc
chr15	37190729	37191210	Bird*Gittelman
chr15	37200424	37200588	Bird*Prabhakar:960
chr15	37242100	37242250	Gittelman
chr15	37337864	37338383	Bird
chr15	37579732	37580142	Pollard_2018_human_sel
chr15	38063708	38064091	Bird
chr15	38105615	38106088	Bird
chr15	38170560	38170950	Gittelman
chr15	42393606	42393734	Bird
chr15	46192685	46192901	Pollard_2018_human_sel
chr15	46392261	46392425	Bird
chr15	49148747	49148912	Prabhakar:696
chr15	52000282	52000453	Pollard_2018_human_bgc
chr15	53811723	53811801	Pollard_2018_human_sel
chr15	53874562	53875117	Pollard_2018_human_sel
chr15	53966608	53966679	Pollard_2018_human_sel
chr15	57551507	57551732	Bird
chr15	58043851	58044013	Prabhakar:82
chr15	58549946	58550015	Pollard_2018_human_sel
chr15	58775837	58775938	Bird
chr15	60033321	60033500	Bird
chr15	60333979	60334133	Pollard
chr15	60446677	60446895	Bird
chr15	60591436	60591855	Pollard_2018_human_sel
chr15	60667561	60667849	Bird*Prabhakar:52
chr15	61591340	61591590	Gittelman
chr15	61816761	61817060	Prabhakar:799
chr15	61935992	61936287	Bird
chr15	61979659	61979996	Bird
chr15	61992836	61993053	Pollard
chr15	66322290	66322483	Prabhakar:847
chr15	66397916	66398194	Prabhakar:924
chr15	66530131	66530353	Bird
chr15	67678127	67678421	Prabhakar:863
chr15	67687200	67687490	Gittelman
chr15	67970293	67970522	Prabhakar:385
chr15	69436128	69436343	Bird
chr15	70111086	70111313	Prabhakar:844
chr15	70140731	70140842	Prabhakar:155
chr15	70306080	70306390	Gittelman*Bird
chr15	70546710	70547014	Bird
chr15	71889266	71889527	Prabhakar:375
chr15	72513501	72513664	Bird
chr15	73103776	73104170	Prabhakar:646
chr15	73290539	73290722	Bird
chr15	75746245	75746770	Gittelman
chr15	76764437	76764818	Bird
chr15	77849020	77849790	Gittelman
chr15	78000391	78000532	Prabhakar:257
chr15	78964053	78964383	Prabhakar:588
chr15	81822500	81822970	Gittelman
chr15	86925692	86925850	Bird
chr15	87025326	87025619	Bird
chr15	87031311	87031507	Prabhakar:649
chr15	88044069	88044463	Bird
chr15	88398145	88398317	Prabhakar:230
chr15	88978083	88978275	Prabhakar:931
chr15	90943200	90947150	gainOverHARs*gainOverHARs*gainOverHARs
chr15	91009460	91009795	Gittelman*Pollard_2018_human_sel
chr15	92302513	92302681	Bird
chr15	92721323	92721635	Bird*Pollard_2018_human_sel
chr15	94433300	94433450	Gittelman
chr15	94988820	94989050	Gittelman
chr15	95171480	95171665	Prabhakar:132
chr15	95274347	95274512	Pollard_2018_human_sel
chr15	95448470	95448603	Prabhakar:237*Pollard
chr15	96056873	96057064	Bush
chr15	96283830	96284078	Bird*Prabhakar:119
chr15	96389100	96389790	Gittelman
chr15	96453844	96454100	Pollard_2018_human_sel
chr15	96590906	96591010	Prabhakar:853
chr15	96728435	96728524	Pollard_2018_human_bgc
chr15	96805987	96806186	Bird*Prabhakar:575
chr15	96921895	96922139	Prabhakar:903
chr15	96952460	96953100	Gittelman*Prabhakar:32*Pollard_2018_human_bgc*Bird
chr15	97092382	97092821	Bird
chr15	98145940	98146042	Prabhakar:255
chr15	98146061	98146489	Pollard*Bird
chr15	98196119	98196246	Bird
chr15	98255868	98256060	Pollard_2018_human_sel*Bird
chr15	98382213	98382281	Pollard_2018_human_bgc
chr15	98459163	98459299	Pollard_2018_human_bgc*Prabhakar:452
chr15	98619619	98619682	Pollard_2018_human_sel
chr15	98886943	98887076	Pollard_2018_human_bgc
chr15	100511601	100511853	Bird
chr15	102010900	102011355	Gittelman
chr16	4149652	4149752	Bush
chr16	4209651	4209751	Bird
chr16	4663129	4663181	Pollard_2018_human_sel
chr16	4766359	4766984	Bird
chr16	5561884	5562062	Bird
chr16	6098589	6098706	Bird
chr16	6496984	6497231	Bird
chr16	6759531	6759715	Bird
chr16	6923337	6923550	Pollard_2018_human_bgc
chr16	7161102	7161343	Bird
chr16	7284771	7285055	Prabhakar:177
chr16	7359838	7359979	Pollard_2018_human_sel*Bird
chr16	7472259	7472645	Pollard_2018_human_sel
chr16	7842499	7842607	Bird
chr16	7977580	7977639	Pollard_2018_human_sel
chr16	8030037	8030429	Bird
chr16	8483315	8483597	Prabhakar:705
chr16	16538004	16538311	Bird
chr16	17812480	17812630	Gittelman
chr16	17853328	17853546	Prabhakar:345*Bird
chr16	17944578	17944875	Prabhakar:976
chr16	18025366	18025531	Bird
chr16	18361285	18361593	Bird
chr16	19621912	19622037	Prabhakar:881
chr16	20247913	20248310	Prabhakar:99
chr16	24444974	24445152	Prabhakar:911
chr16	25530501	25530657	Prabhakar:211
chr16	25847645	25848116	Bird
chr16	27811380	27811550	Gittelman
chr16	31693118	31693231	Bird
chr16	34338427	34338660	Bird
chr16	48368381	48368543	Bird
chr16	48722595	48722766	Prabhakar:228
chr16	48879497	48879658	Prabhakar:181
chr16	51053172	51053411	Prabhakar:754
chr16	51101635	51101753	Bird
chr16	51136465	51136682	Bird
chr16	52552025	52552582	Pollard_2018_human_sel
chr16	52557593	52558226	Prabhakar:136
chr16	52602921	52603255	Prabhakar:795
chr16	54162238	54162775	Bird
chr16	54260361	54260860	Bird
chr16	54518416	54518596	Pollard_2018_human_sel
chr16	54748042	54748503	Prabhakar:527
chr16	59178444	59178638	Bird
chr16	59204025	59204331	Pollard_2018_human_bgc
chr16	59204359	59204437	Pollard_2018_human_bgc
chr16	59587760	59587930	Gittelman
chr16	60323195	60323531	Pollard_2018_human_sel
chr16	60353668	60353759	Pollard_2018_human_bgc
chr16	61105957	61106212	Prabhakar:298
chr16	61494743	61495050	Prabhakar:956
chr16	61499507	61499825	Prabhakar:390
chr16	61549957	61550181	Prabhakar:234
chr16	61598492	61598646	Bird
chr16	61602751	61603231	Prabhakar:444
chr16	62083702	62083939	Prabhakar:152
chr16	62734554	62734960	Bird
chr16	62943298	62943793	Bird
chr16	62983906	62984264	Prabhakar:260
chr16	63167093	63167486	Bird
chr16	63362266	63362443	Prabhakar:72
chr16	63850349	63850448	Pollard
chr16	63979258	63979620	Pollard_2018_human_bgc
chr16	64015392	64015780	Bird
chr16	64347007	64347138	Prabhakar:968
chr16	64598893	64599122	Prabhakar:653
chr16	64803116	64803385	Pollard_2018_human_sel*Gittelman
chr16	65043720	65043870	Gittelman
chr16	65178840	65179196	Bird
chr16	65257692	65257877	Bird
chr16	65855149	65855351	Prabhakar:478
chr16	68541826	68542008	Prabhakar:290*Bird
chr16	68988894	68989216	Prabhakar:714
chr16	72201095	72201458	Pollard_2018_human_sel*Prabhakar:618
chr16	72645923	72646109	Bird
chr16	72667680	72668020	Prabhakar:405*Bird
chr16	73086940	73087560	Gittelman
chr16	73129256	73129722	Bird*Pollard_2018_human_sel*Pollard
chr16	73249173	73249457	Pollard_2018_human_sel
chr16	73516670	73516824	Pollard
chr16	73538974	73539084	Pollard
chr16	73559607	73559772	Prabhakar:933
chr16	73573697	73573817	Prabhakar:682*Pollard_2018_human_bgc
chr16	73657246	73657645	Bird
chr16	73851626	73852117	Pollard_2018_human_sel*Pollard
chr16	73918821	73918942	Pollard_2018_human_bgc
chr16	76962174	76962441	Prabhakar:65*Pollard_2018_human_sel
chr16	77019154	77019345	Bird
chr16	77127332	77127484	Bird
chr16	77613220	77613560	Gittelman
chr16	77637948	77638164	Prabhakar:846
chr16	78218430	78218683	Prabhakar:756*Pollard_2018_human_sel
chr16	78359221	78359549	Pollard
chr16	78471280	78471570	Gittelman
chr16	78517337	78517675	Pollard_2018_human_sel
chr16	78925400	78925528	Pollard
chr16	78991985	78992463	Pollard_2018_human_sel*Bird*Prabhakar:160
chr16	79056323	79056601	Bird
chr16	79336499	79336700	Bird
chr16	79934248	79934397	Bird
chr16	80079779	80080106	Pollard_2018_human_sel*Bird*Prabhakar:40
chr16	80155484	80156013	Prabhakar:563*Pollard*Gittelman
chr16	80308387	80308509	Bird
chr16	80319990	80320208	Bird
chr16	80852597	80852842	Bush
chr16	82295096	82295367	Bird*Pollard_2018_human_sel*Prabhakar:44
chr16	82533224	82533547	Bird
chr16	82661420	82661700	Gittelman
chr16	82816280	82817030	Gittelman
chr16	82843103	82843561	Prabhakar:900*Pollard
chr16	82974229	82974335	Pollard_2018_human_sel
chr16	83076592	83076645	Pollard_2018_human_bgc
chr16	85292458	85292530	Pollard_2018_human_sel
chr16	85399600	85400330	Gittelman
chr16	87098800	87099370	Gittelman
chr16	89459369	89460120	Bird
chr16	89647507	89647643	Bird
chr17	6004	6172	Bird
chr17	597337	597546	Prabhakar:471
chr17	2141663	2142105	Bird*Prabhakar:429
chr17	2202961	2203224	Pollard_2018_human_sel
chr17	3414111	3414193	Pollard_2018_human_sel
chr17	5264465	5264975	Gittelman*Pollard_2018_human_bgc
chr17	5958064	5958197	Prabhakar:613
chr17	6050355	6050576	Pollard
chr17	6063620	6063810	Gittelman
chr17	9350158	9350561	Bird
chr17	9756232	9756625	Bird
chr17	9877400	9877710	Gittelman
chr17	10883019	10883236	Prabhakar:784
chr17	12691179	12691323	Pollard_2018_human_sel
chr17	20624303	20624904	Bird
chr17	20642792	20643282	Bird
chr17	28004700	28004850	Gittelman
chr17	31643628	31644030	Prabhakar:700
chr17	33235370	33235651	Prabhakar:344*Bird
chr17	33395320	33395870	Gittelman
chr17	33920184	33920461	Bird
chr17	34027689	34027939	Prabhakar:141
chr17	35396141	35396319	Bird*Prabhakar:530
chr17	38799124	38799574	Prabhakar:807*Bird
chr17	40530662	40530810	Prabhakar:918
chr17	40620289	40620465	Bird
chr17	42215400	42215995	Gittelman
chr17	45196806	45197107	Bird
chr17	45762183	45762490	Bird
chr17	46222880	46223110	Gittelman
chr17	46295952	46296234	Pollard_2018_human_sel*Prabhakar:78
chr17	46409923	46410129	Bird
chr17	47554963	47555420	Prabhakar:693
chr17	48393857	48393908	Pollard_2018_human_bgc
chr17	49716407	49716681	Prabhakar:303
chr17	49829434	49829694	Prabhakar:299*Bird
chr17	50251770	50251977	Bird
chr17	51466790	51466958	Prabhakar:417
chr17	51649299	51649581	Bird
chr17	52481374	52481547	Bird
chr17	52505331	52505523	Prabhakar:834
chr17	52538504	52538705	Bird
chr17	55497655	55497731	Pollard_2018_human_sel
chr17	55675585	55675881	Pollard_2018_human_bgc*Bird*Pollard
chr17	58077374	58077529	Bird
chr17	59337678	59338126	Prabhakar:208*Bird
chr17	59444466	59444814	Bird
chr17	60316103	60316255	Bird
chr17	60318847	60319008	Bird
chr17	62538469	62538577	Pollard
chr17	63435100	63435484	Prabhakar:772
chr17	63534630	63534912	Bird
chr17	65423735	65423936	Prabhakar:206*Pollard_2018_human_bgc
chr17	66202280	66202382	Bird
chr17	68698507	68698769	Bird
chr17	69282674	69283113	Bush
chr17	69559985	69560198	Prabhakar:346
chr17	69677401	69677728	Bird
chr17	71159174	71159467	Bird
chr17	71378712	71378863	Bird
chr17	71800180	71800755	Gittelman
chr17	73686725	73686970	Gittelman
chr17	74908980	74909130	Gittelman
chr17	75038894	75039140	Prabhakar:828
chr17	75723275	75723354	Pollard_2018_human_bgc
chr17	75778472	75778694	Prabhakar:149
chr17	77924863	77925031	Bird
chr18	904155	904584	Pollard_2018_human_bgc*Bird
chr18	907655	907710	Pollard_2018_human_bgc
chr18	908288	908387	Pollard_2018_human_bgc
chr18	908420	909170	Gittelman*Pollard_2018_human_bgc
chr18	1094514	1094719	Bird
chr18	2160552	2161950	Bird
chr18	2240380	2240610	Gittelman
chr18	2846697	2846818	Pollard_2018_human_bgc
chr18	3214860	3215270	Gittelman
chr18	3499005	3499550	Gittelman
chr18	4107121	4107176	Pollard_2018_human_bgc
chr18	5964449	5964661	Prabhakar:786
chr18	6363016	6363119	Bird
chr18	7442568	7442650	Pollard_2018_human_sel
chr18	18902371	18902584	Bird
chr18	19402440	19402590	Gittelman
chr18	19674608	19674687	Pollard_2018_human_bgc
chr18	21252213	21252713	Bird
chr18	22622580	22623065	Gittelman*Bird
chr18	22657985	22658150	Gittelman
chr18	22714860	22715210	Gittelman
chr18	22728041	22728380	Bird
chr18	22754684	22754959	Pollard
chr18	22873794	22874107	Bird
chr18	23194601	23194908	Bird
chr18	23259560	23259950	Gittelman
chr18	23458460	23458831	Bird
chr18	23915443	23916424	Bird
chr18	25017862	25018188	Bird
chr18	25201528	25201814	Bird
chr18	26175386	26175447	Pollard_2018_human_bgc
chr18	27836740	27836890	Gittelman
chr18	27909022	27909128	Bird
chr18	30351294	30351403	Pollard
chr18	30627066	30627252	Prabhakar:312
chr18	31165125	31165691	Gittelman*Bird
chr18	33570460	33570610	Gittelman
chr18	34049662	34050048	Prabhakar:216
chr18	35249100	35249370	Gittelman
chr18	35294747	35294918	Pollard
chr18	35526428	35526747	Pollard_2018_human_sel*Prabhakar:39
chr18	35564574	35565238	Bird
chr18	36062928	36063117	Prabhakar:131
chr18	36339183	36339484	Prabhakar:305
chr18	36545021	36545192	Pollard
chr18	36619858	36620098	Prabhakar:495
chr18	36685136	36685493	Prabhakar:770
chr18	36891317	36891978	Bird
chr18	37172920	37173447	Bush
chr18	37254904	37255258	Bird
chr18	37261081	37261208	Pollard
chr18	37293654	37293774	Pollard
chr18	37387302	37387602	Bird
chr18	37489757	37489916	Prabhakar:892
chr18	37585377	37585728	Bird
chr18	37732893	37733050	Prabhakar:517
chr18	37940589	37940888	Bird
chr18	37967451	37967656	Prabhakar:434
chr18	38012221	38012434	Bird
chr18	38291749	38291913	Bird
chr18	38430800	38430950	Gittelman
chr18	39459640	39459781	Bird
chr18	39711324	39711615	Bird
chr18	39929358	39929629	Bird
chr18	39998340	39998530	Gittelman
chr18	41605311	41605582	Bird
chr18	41766151	41766417	Bird
chr18	41853835	41854306	Bird
chr18	42871845	42872636	Bird*Pollard
chr18	42879000	42879290	Gittelman
chr18	43014904	43015071	Prabhakar:621*Pollard
chr18	43142480	43143030	Gittelman
chr18	44068825	44069010	Gittelman
chr18	44901786	44902072	Bird
chr18	44929828	44930068	Bird
chr18	45735100	45735390	Gittelman
chr18	46139484	46139560	Pollard_2018_human_sel
chr18	46466558	46466641	Prabhakar:916
chr18	46500907	46500958	Pollard_2018_human_sel
chr18	48968445	48968669	Prabhakar:777
chr18	49139011	49139414	Bird
chr18	49406080	49406383	Prabhakar:218*Pollard_2018_human_sel
chr18	50095369	50095521	Prabhakar:267
chr18	50547654	50547833	Bird
chr18	51028700	51029123	Prabhakar:969
chr18	52745792	52745943	Prabhakar:761
chr18	53359407	53359710	Prabhakar:982*Gittelman
chr18	53726398	53726726	Pollard_2018_human_bgc*Prabhakar:13
chr18	53999705	53999890	Gittelman
chr18	54067442	54067852	Prabhakar:654
chr18	55051565	55051761	Bird
chr18	56578960	56579470	Gittelman
chr18	57020427	57020535	Pollard_2018_human_bgc
chr18	57368400	57368850	Gittelman
chr18	59138921	59139147	Bird*Prabhakar:420
chr18	59296663	59296909	Prabhakar:42
chr18	62021342	62021567	Pollard_2018_human_sel
chr18	62504900	62505110	Gittelman
chr18	63172914	63173015	Prabhakar:161
chr18	63331788	63332125	Bird
chr18	64330021	64330302	Bird
chr18	64447520	64447670	Gittelman
chr18	64447815	64448349	Bird
chr18	65176767	65176880	Pollard_2018_human_sel
chr18	68137920	68138170	Gittelman
chr18	68545407	68545636	Bird
chr18	69333197	69333309	Bird
chr18	69663153	69663531	Bird
chr18	72480388	72480572	Prabhakar:902
chr18	72508477	72509506	Pollard_2018_human_sel
chr18	72511037	72511176	Pollard
chr18	72582237	72582342	Prabhakar:859
chr18	72613874	72614606	Prabhakar:593
chr18	72769556	72769950	Pollard_2018_human_bgc
chr18	72872900	72873230	Bird
chr18	73257060	73257390	Gittelman
chr18	73333375	73337100	gainOverHACNE*Prabhakar:555
chr18	73767980	73768122	Prabhakar:479
chr18	74071797	74071887	Prabhakar:525
chr18	76008039	76008235	Pollard_2018_human_sel*Bird
chr18	76190067	76190551	Prabhakar:368*Pollard
chr18	76532348	76532585	Bird
chr19	5649676	5649857	Bird
chr19	7561410	7561696	Bird
chr19	13004946	13005696	Bird
chr19	21213677	21213981	Bird
chr19	21833910	21834130	Bird
chr19	22269071	22269400	Bird
chr19	23310586	23311395	Bird
chr19	28892043	28892290	Bird
chr19	29352648	29352841	Bird
chr19	30979710	30979913	Bird
chr19	31154040	31154330	Gittelman
chr19	31398229	31398702	Prabhakar:554*Gittelman
chr19	31795434	31795605	Pollard
chr19	31912411	31912806	Bird
chr19	32263617	32263881	Bird
chr19	32380381	32380760	Prabhakar:192
chr19	32560820	32561108	Bird
chr19	32725644	32726400	Bird
chr19	33928145	33928535	Prabhakar:445
chr19	34857520	34858080	Gittelman
chr19	36090068	36090392	Bush
chr19	37247184	37247398	Bird
chr19	38554096	38554292	Prabhakar:47*Bird
chr19	42680044	42680364	Bird
chr19	49533234	49533386	Bird
chr19	53230107	53230497	Bird
chr2	2593308	2593497	Bird
chr2	6485395	6485718	Bird
chr2	6704433	6704810	Bird
chr2	7464877	7465126	Bird
chr2	8012025	8012161	Prabhakar:811
chr2	8549680	8550270	Gittelman
chr2	9595784	9595888	Pollard_2018_human_bgc
chr2	10044981	10045140	Pollard_2018_human_sel
chr2	11242506	11242669	Bird
chr2	12061151	12061650	Prabhakar:373*Gittelman
chr2	12538254	12538438	Prabhakar:468
chr2	14837416	14837799	Bird
chr2	16224877	16225057	Prabhakar:133
chr2	19661653	19661796	Pollard
chr2	20698159	20698282	Bird
chr2	21475216	21475777	Bird*Prabhakar:220
chr2	21595957	21596027	Bush
chr2	21676287	21676953	Prabhakar:791*Gittelman*Prabhakar:137
chr2	21721039	21721345	Prabhakar:407*Bird
chr2	21741640	21741777	Bird
chr2	21742295	21742522	Prabhakar:85*Pollard_2018_human_bgc
chr2	21882002	21882324	Prabhakar:874
chr2	21980620	21981350	Gittelman*Prabhakar:744
chr2	21992118	21992183	Pollard_2018_human_bgc
chr2	22551960	22552710	Gittelman*Bird
chr2	22822540	22822789	Gittelman*Bird
chr2	22886044	22886184	Bird
chr2	23125049	23125329	Bird*Pollard_2018_human_sel*Prabhakar:402*Pollard
chr2	23264260	23264470	Gittelman
chr2	23466625	23467089	Pollard_2018_human_sel
chr2	23555047	23555340	Prabhakar:26
chr2	23637713	23637838	Bird
chr2	23831324	23831814	Bird
chr2	25303790	25304198	Bird
chr2	26032794	26033230	Bird
chr2	26792905	26793190	Gittelman
chr2	27716160	27716650	Gittelman
chr2	30087740	30087935	Prabhakar:250
chr2	30704858	30705164	Bird
chr2	31298452	31298513	Pollard_2018_human_sel
chr2	33783597	33783850	Bush
chr2	33930033	33930349	Prabhakar:398
chr2	34609951	34610173	Prabhakar:592
chr2	34792309	34792506	Prabhakar:94
chr2	35732358	35732567	Bird
chr2	36566967	36567298	Bird
chr2	36616426	36616665	Bird
chr2	36654940	36655220	Gittelman
chr2	36752990	36753338	Bird
chr2	38260969	38261148	Bird
chr2	39836618	39836722	Bird
chr2	41010944	41011125	Bird
chr2	44252259	44252551	Prabhakar:163
chr2	44707105	44707276	Prabhakar:171
chr2	44720746	44721389	Bird
chr2	44944607	44944911	Bird
chr2	45560690	45560886	Prabhakar:282
chr2	46077205	46077277	Pollard_2018_human_bgc
chr2	49444182	49444358	Prabhakar:292
chr2	49583378	49583812	Pollard_2018_human_sel*Prabhakar:412
chr2	49611237	49611357	Prabhakar:263
chr2	50281694	50282858	Bird
chr2	52797784	52797971	Bird
chr2	53341860	53342050	Gittelman
chr2	56490098	56490296	Prabhakar:371
chr2	57835325	57835635	Bush
chr2	58282128	58282836	Bird
chr2	58591064	58591452	Pollard_2018_human_sel*Bird
chr2	59179055	59179889	Prabhakar:851*Pollard
chr2	59303029	59303083	Pollard_2018_human_bgc
chr2	59416552	59416948	Pollard_2018_human_sel
chr2	59517950	59518414	Bird
chr2	59887112	59887472	Prabhakar:101*Bird
chr2	60280860	60281290	Gittelman
chr2	60516666	60516829	Pollard
chr2	64067160	64067310	Gittelman
chr2	66759651	66759872	Prabhakar:855
chr2	66913816	66914216	Prabhakar:630
chr2	66927809	66927951	Bird
chr2	67153608	67153996	Prabhakar:925
chr2	68069816	68070029	Bird
chr2	71923818	71924074	Prabhakar:989*Bird
chr2	72077011	72077260	Prabhakar:711
chr2	76508173	76508319	Prabhakar:509
chr2	76782906	76783459	Prabhakar:937
chr2	77634111	77634246	Pollard_2018_human_sel
chr2	77829326	77829624	Prabhakar:800
chr2	78801380	78801594	Prabhakar:582
chr2	78801597	78801653	Pollard_2018_human_sel
chr2	79851476	79851582	Pollard_2018_human_bgc
chr2	80041110	80041178	Bush
chr2	80187599	80187706	Pollard_2018_human_sel
chr2	80318402	80318560	Bird*Prabhakar:166
chr2	80802697	80803027	Prabhakar:92*Bird
chr2	80842761	80842923	Bird
chr2	80865761	80866001	Bird
chr2	80867719	80867814	Pollard_2018_human_sel
chr2	80905307	80905508	Prabhakar:560
chr2	81424515	81424677	Bird
chr2	83390323	83390530	Prabhakar:391
chr2	84145634	84145810	Pollard_2018_human_sel
chr2	84257670	84257796	Bird
chr2	84461280	84461510	Gittelman
chr2	86695339	86695551	Bird
chr2	87373616	87373759	Bird
chr2	87865326	87866345	Bird
chr2	88189830	88190129	Bird
chr2	92252217	92252528	Bird
chr2	100658011	100658202	Prabhakar:433
chr2	100765546	100765724	Prabhakar:806
chr2	103467243	103467418	Prabhakar:431*Bird
chr2	103851799	103851933	Prabhakar:393
chr2	104823970	104824544	Prabhakar:374
chr2	105031263	105031550	Prabhakar:359*Bird
chr2	105158357	105158695	Prabhakar:669
chr2	105489020	105489380	Gittelman
chr2	105561548	105561747	Bird
chr2	105879181	105879521	Prabhakar:683*Bird
chr2	106054240	106054550	Gittelman
chr2	107768398	107768549	Bird
chr2	108602605	108603115	Gittelman
chr2	108677920	108678150	Gittelman
chr2	109040187	109040349	Bird
chr2	110622266	110622503	Bird
chr2	111264156	111264394	Bird
chr2	111616307	111616489	Prabhakar:985
chr2	112141310	112141511	Bird
chr2	112141904	112142571	Bird
chr2	113992300	113994825	gainOverHARs*Gittelman
chr2	114489154	114489227	Pollard_2018_human_bgc
chr2	114647840	114648480	Gittelman
chr2	114959690	114959873	Bird
chr2	116474381	116474511	Prabhakar:77*Pollard_2018_human_bgc
chr2	116606460	116606782	Prabhakar:122
chr2	117484055	117484292	Bird
chr2	118809562	118809721	Pollard
chr2	119036605	119036870	Gittelman
chr2	119066625	119069475	gainOverHARs*gainOverHACNE*gainOverHARs*gainOverHACNE*Prabhakar:56*Gittelman*Pollard*Pollard
chr2	119600160	119600580	Gittelman
chr2	121549253	121549552	Bush
chr2	121730653	121730762	Bird
chr2	121730797	121730853	Pollard_2018_human_sel
chr2	121832810	121833140	Prabhakar:4
chr2	124313006	124313291	Bird
chr2	124653209	124653514	Bird
chr2	124996400	124996550	Gittelman
chr2	126292758	126292859	Prabhakar:815
chr2	126375801	126376044	Bird
chr2	129715169	129715320	Bird
chr2	132680938	132681047	Bird
chr2	133346893	133347089	Prabhakar:95*Bird
chr2	133878130	133878262	Bird
chr2	135118260	135118550	Gittelman
chr2	137386811	137387013	Prabhakar:886
chr2	137747941	137748233	Prabhakar:842
chr2	137917312	137917468	Prabhakar:453
chr2	138669878	138670341	Bird
chr2	140071531	140071651	Pollard_2018_human_sel
chr2	142547707	142547785	Pollard_2018_human_sel
chr2	142764731	142764833	Bird
chr2	143026034	143026303	Bird
chr2	143475857	143476078	Prabhakar:259
chr2	143612183	143612528	Bird
chr2	143682548	143682905	Bird
chr2	144006144	144006494	Bush
chr2	144050260	144050505	Bird
chr2	144332930	144333477	Bird
chr2	144483820	144483970	Gittelman
chr2	144581548	144581672	Pollard
chr2	144617839	144618263	Bird
chr2	144754666	144755630	Bird
chr2	145144655	145145074	Bird
chr2	145157959	145158325	Pollard_2018_human_sel
chr2	145234574	145235190	Bird*Prabhakar:631*Pollard*Gittelman
chr2	145785838	145786411	Bird
chr2	145868640	145868841	Gittelman*Pollard_2018_human_sel
chr2	145978042	145978795	Bird
chr2	146257878	146258333	Bird
chr2	146487443	146487751	Bird
chr2	146632033	146632363	Bird
chr2	146677881	146678038	Pollard_2018_human_sel
chr2	147023162	147023427	Pollard
chr2	147187000	147187170	Gittelman
chr2	147349460	147349875	Pollard
chr2	147382124	147382769	Pollard_2018_human_sel*Bird
chr2	147955812	147956576	Bird
chr2	148222413	148222624	Bird*Prabhakar:401
chr2	151478040	151478710	Gittelman
chr2	151644940	151645290	Gittelman
chr2	152208554	152208813	Bird
chr2	153981817	153982021	Prabhakar:915
chr2	154759631	154759847	Pollard_2018_human_sel
chr2	156583117	156583325	Pollard
chr2	157012772	157013338	Bird
chr2	157463612	157463993	Bird
chr2	157839985	157840157	Pollard
chr2	158641915	158642082	Prabhakar:238
chr2	160724316	160724381	Pollard_2018_human_bgc
chr2	161453020	161453410	Gittelman
chr2	162286139	162286320	Prabhakar:500
chr2	162298583	162298940	Bird*Prabhakar:106
chr2	163563344	163563492	Prabhakar:983
chr2	164178487	164179046	Bird
chr2	164254736	164255195	Bird*Pollard_2018_human_sel
chr2	164410054	164410373	Bird
chr2	164616320	164616693	Bird
chr2	164777458	164777518	Pollard_2018_human_bgc
chr2	164972651	164973088	Bird
chr2	166350715	166350815	Pollard
chr2	167977940	167978231	Prabhakar:718
chr2	168678831	168679036	Pollard_2018_human_sel
chr2	169426890	169427026	Pollard_2018_human_sel
chr2	169630245	169630560	Gittelman
chr2	171002630	171002854	Prabhakar:484
chr2	171679517	171679721	Prabhakar:57*Bird
chr2	171737418	171737687	Bird
chr2	172201674	172202019	Bird
chr2	172430319	172430657	Prabhakar:454
chr2	173251452	173251695	Prabhakar:747
chr2	174524179	174524435	Bird
chr2	174973161	174973869	Bird
chr2	176433444	176433538	Pollard_2018_human_sel
chr2	176433901	176434093	Prabhakar:719
chr2	176435822	176436229	Prabhakar:84
chr2	176473588	176473730	Bush
chr2	176530702	176530828	Prabhakar:441
chr2	176943110	176943744	Bird
chr2	177454094	177454390	Pollard_2018_human_sel
chr2	177716143	177716304	Pollard
chr2	177744412	177744743	Pollard_2018_human_sel*Bird*Pollard
chr2	178094013	178094226	Bird
chr2	179668967	179669146	Prabhakar:408
chr2	181186468	181186808	Prabhakar:760
chr2	181324625	181324898	Prabhakar:34
chr2	181325445	181325674	Prabhakar:664
chr2	181711686	181711805	Pollard
chr2	182333573	182333875	Bird
chr2	182731200	182731257	Pollard_2018_human_sel
chr2	182857233	182857307	Pollard_2018_human_bgc
chr2	184009371	184009756	Bird
chr2	184419136	184419335	Prabhakar:848
chr2	186588992	186589234	Prabhakar:170
chr2	187399182	187399317	Bird
chr2	192742612	192742818	Prabhakar:823
chr2	193321376	193321961	Bird
chr2	195351180	195351330	Gittelman
chr2	195871722	195871960	Bird
chr2	197742179	197742405	Bird
chr2	199183373	199183662	Bird
chr2	199951905	199952123	Bird
chr2	200026029	200026410	Pollard_2018_human_bgc
chr2	200488473	200488917	Bird
chr2	201038051	201038500	Prabhakar:686
chr2	202987965	202988205	Prabhakar:135
chr2	205129752	205129895	Pollard_2018_human_sel
chr2	205625125	205625332	Bird
chr2	205785372	205785509	Pollard
chr2	205977305	205977433	Bird
chr2	206000675	206000857	Prabhakar:325
chr2	206027914	206027969	Pollard_2018_human_bgc
chr2	206291623	206291833	Prabhakar:460
chr2	206536851	206537127	Prabhakar:265
chr2	206867685	206867848	Bird
chr2	207509006	207509337	Bird
chr2	207710459	207710766	Bird
chr2	208001560	208002050	Gittelman
chr2	208003340	208003890	Gittelman
chr2	208119171	208119258	Pollard_2018_human_bgc
chr2	208297115	208297758	Prabhakar:91
chr2	208972996	208973133	Bird
chr2	212015016	212015200	Bird
chr2	212103243	212103422	Prabhakar:977
chr2	212399208	212399809	Bird
chr2	212773117	212773496	Prabhakar:183*Bird
chr2	212936314	212936503	Bird
chr2	212973922	212974152	Prabhakar:505*Bird
chr2	213057445	213057853	Bird
chr2	213080564	213080806	Pollard
chr2	213187289	213187570	Pollard_2018_human_sel*Bird
chr2	213934108	213934497	Prabhakar:586
chr2	214091494	214091581	Pollard_2018_human_bgc
chr2	215442400	215442850	Gittelman
chr2	215453324	215453543	Pollard_2018_human_sel*Prabhakar:743
chr2	215764795	215765213	Bird
chr2	217501520	217501623	Bird
chr2	217728640	217729030	Gittelman*Prabhakar:826
chr2	218770160	218770410	Gittelman
chr2	219933896	219934115	Prabhakar:280
chr2	220263666	220263897	Bird
chr2	220289006	220289313	Bird*Prabhakar:118
chr2	221345433	221345606	Prabhakar:935
chr2	221382197	221382405	Prabhakar:89
chr2	222048756	222048918	Prabhakar:201
chr2	222218795	222219029	Bird
chr2	222241920	222242265	Bird
chr2	222556948	222557352	Prabhakar:628
chr2	222791098	222791312	Prabhakar:697*Bird
chr2	222909209	222909716	Bird
chr2	222926589	222926976	Bird
chr2	223040193	223040689	Bird
chr2	225510500	225510790	Gittelman
chr2	226043489	226043718	Bird
chr2	226361662	226361929	Prabhakar:88
chr2	227362040	227362211	Gittelman*Prabhakar:856
chr2	230138115	230138367	Prabhakar:363
chr2	236438746	236438901	Bush
chr2	236771800	236776475	gainOverHARs*gainOverHACNE*Prabhakar:1*Gittelman*Bird*Pollard
chr2	237089355	237089520	Prabhakar:457
chr2	237776600	237776890	Gittelman
chr2	238224260	238224490	Gittelman
chr20	1045527	1045713	Prabhakar:984
chr20	3053005	3053064	Pollard_2018_human_bgc
chr20	3143734	3143887	Pollard_2018_human_sel
chr20	3673286	3673387	Pollard_2018_human_sel
chr20	5140594	5140787	Bird
chr20	6542448	6542630	Bird
chr20	6631662	6632045	Prabhakar:46
chr20	6955974	6956419	Pollard_2018_human_sel
chr20	7092298	7092521	Bird
chr20	8149635	8149822	Prabhakar:751
chr20	8252338	8252575	Bird
chr20	8633301	8633528	Pollard_2018_human_sel*Prabhakar:102
chr20	8882385	8882538	Prabhakar:473
chr20	8965545	8965731	Prabhakar:715*Bird
chr20	9455560	9456030	Gittelman
chr20	11108780	11109390	Gittelman
chr20	11109526	11109672	Prabhakar:808
chr20	12175528	12175698	Prabhakar:939*Pollard_2018_human_sel
chr20	12877641	12877897	Prabhakar:200
chr20	15203727	15203910	Prabhakar:650
chr20	15493511	15493681	Prabhakar:196
chr20	15910777	15910881	Bird
chr20	15922137	15922223	Pollard_2018_human_bgc
chr20	16421494	16421770	Bird
chr20	21026209	21026546	Prabhakar:508
chr20	21757708	21758104	Prabhakar:27
chr20	21922580	21922890	Gittelman
chr20	29888860	29889054	Bush
chr20	29930518	29930725	Bird
chr20	30196293	30196574	Pollard_2018_human_sel
chr20	30425199	30425393	Bird
chr20	36479495	36479673	Prabhakar:17
chr20	37712525	37712777	Prabhakar:656
chr20	38076424	38076636	Prabhakar:315
chr20	38169985	38170188	Prabhakar:957
chr20	38230561	38230972	Prabhakar:285
chr20	38245004	38245127	Prabhakar:909
chr20	38736413	38736617	Bird
chr20	39380382	39380593	Bird
chr20	39488218	39488272	Pollard_2018_human_sel
chr20	39513665	39513815	Gittelman
chr20	39825490	39825831	Bird
chr20	39959875	39960136	Bird
chr20	40510649	40510848	Bird
chr20	40811158	40811347	Prabhakar:98
chr20	40910409	40910688	Pollard_2018_human_bgc*Bird
chr20	41387334	41387400	Bush
chr20	41525538	41525884	Bird*Prabhakar:193*Pollard
chr20	41741802	41742114	Bird*Prabhakar:330
chr20	41774382	41775006	Pollard_2018_human_bgc
chr20	43459995	43460214	Prabhakar:333
chr20	44853809	44854118	Prabhakar:962
chr20	48863588	48863643	Pollard_2018_human_bgc
chr20	50222815	50222949	Bird
chr20	51094123	51094474	Bird
chr20	51686111	51686191	Pollard_2018_human_bgc
chr20	51759220	51759370	Gittelman
chr20	51822984	51823091	Bird
chr20	51981200	51981370	Gittelman
chr20	51989612	51989813	Pollard_2018_human_sel
chr20	53493401	53493695	Prabhakar:695*Bird
chr20	56846854	56847210	Bird
chr20	58816019	58816177	Prabhakar:294
chr20	60204583	60204692	Pollard_2018_human_sel*Bird
chr20	60269996	60270180	Bird
chr20	61717153	61717362	Bird
chr20	61733446	61733630	Bird*Pollard_2018_human_bgc*Pollard
chr21	11011418	11011657	Bird
chr21	14607757	14607888	Bird
chr21	15706225	15706497	Prabhakar:661
chr21	15825740	15825930	Gittelman
chr21	16066426	16066640	Prabhakar:204
chr21	16093058	16093388	Bird
chr21	16247227	16247410	Bird
chr21	17443380	17443790	Gittelman
chr21	17828743	17828836	Pollard_2018_human_sel
chr21	18137382	18137680	Bird
chr21	18160751	18161194	Pollard_2018_human_bgc
chr21	18215634	18215851	Bird
chr21	18436487	18436598	Pollard_2018_human_bgc
chr21	19398574	19398931	Pollard_2018_human_sel
chr21	19475166	19475299	Bird
chr21	19722097	19722403	Bird
chr21	21946680	21946898	Prabhakar:440
chr21	22334586	22334644	Pollard_2018_human_bgc
chr21	26548379	26548443	Bush
chr21	27213884	27214049	Bird
chr21	28048616	28048730	Bird
chr21	28374451	28374514	Pollard_2018_human_sel
chr21	30238181	30238308	Bird
chr21	30238635	30239668	Bird
chr21	30331733	30332022	Pollard_2018_human_bgc
chr21	30429195	30429325	Bird
chr21	30752489	30752806	Bird
chr21	30930720	30930940	Prabhakar:814
chr21	31029348	31029555	Bird
chr21	33220160	33220450	Gittelman
chr21	34559934	34560096	Bird
chr21	35467060	35467476	Pollard_2018_human_bgc
chr21	36173491	36173801	Bird
chr21	36341100	36341590	Gittelman
chr21	36605081	36605243	Pollard_2018_human_bgc
chr21	39235849	39235906	Pollard_2018_human_bgc
chr21	42059585	42059850	Gittelman
chr21	45502400	45502940	Gittelman
chr21	46096219	46096503	Bird
chr21	46096900	46097077	Bird
chr22	16158331	16158489	Bird
chr22	27210299	27210802	Pollard_2018_human_sel*Prabhakar:552*Bird
chr22	28145200	28145355	Gittelman
chr22	34360462	34360697	Bird
chr22	36168924	36169092	Prabhakar:930
chr22	38549322	38549487	Bird
chr22	42714263	42714365	Pollard
chr22	43400516	43400688	Prabhakar:496
chr22	47241184	47241373	Prabhakar:217*Pollard
chr22	49354866	49355233	Prabhakar:384
chr22	49497313	49497599	Prabhakar:652*Pollard_2018_human_sel*Pollard
chr3	63277	63589	Bird
chr3	563108	563396	Prabhakar:326
chr3	582064	582406	Prabhakar:273
chr3	609533	609805	Pollard
chr3	615847	616023	Bird
chr3	683637	683894	Prabhakar:2
chr3	764672	764966	Bird
chr3	817551	817756	Bird
chr3	992962	993177	Pollard_2018_human_bgc
chr3	1007929	1008395	Prabhakar:877*Bird
chr3	1237640	1237970	Gittelman
chr3	1273598	1273785	Bird
chr3	1677069	1677467	Prabhakar:421
chr3	1711231	1711537	Bird*Prabhakar:394
chr3	2137725	2138157	Prabhakar:451
chr3	2141600	2142075	Gittelman
chr3	2310818	2311051	Prabhakar:888
chr3	2392345	2392505	Bush
chr3	2681614	2681842	Bird
chr3	2701980	2702310	Gittelman
chr3	2783280	2783850	Gittelman*Prabhakar:589
chr3	4774718	4774920	Pollard_2018_human_bgc*Pollard
chr3	4790328	4790561	Prabhakar:611
chr3	5028599	5028854	Pollard_2018_human_bgc
chr3	5313959	5314200	Bird
chr3	5467965	5468145	Prabhakar:607
chr3	5969249	5969309	Pollard_2018_human_bgc
chr3	6907076	6907140	Pollard_2018_human_sel
chr3	6969840	6970070	Gittelman
chr3	7961680	7961930	Gittelman
chr3	10726994	10727090	Pollard_2018_human_bgc
chr3	11641980	11642395	Gittelman
chr3	12421199	12421433	Pollard_2018_human_sel
chr3	12940580	12940875	Gittelman
chr3	13276264	13276381	Prabhakar:482
chr3	15182881	15183579	Bird
chr3	15563358	15563542	Prabhakar:810
chr3	16923375	16928375	gainOverHARs*gainOverHARs
chr3	18512895	18512971	Bush
chr3	18929961	18930018	Pollard_2018_human_bgc
chr3	19007900	19008059	Prabhakar:706
chr3	19442100	19442350	Gittelman
chr3	20420312	20420541	Bird
chr3	21801560	21801901	Bird
chr3	27951920	27952069	Prabhakar:598
chr3	28307320	28307509	Pollard
chr3	29482120	29482455	Gittelman
chr3	29951685	29951779	Pollard_2018_human_bgc
chr3	31423138	31423194	Pollard_2018_human_bgc
chr3	34354205	34354464	Bird*Gittelman
chr3	34553663	34553827	Prabhakar:778
chr3	35721780	35722050	Gittelman
chr3	35807981	35808302	Bird
chr3	39136440	39136870	Gittelman
chr3	41381360	41381510	Gittelman
chr3	41958724	41958958	Bird
chr3	50824987	50825447	Bird
chr3	52354240	52354470	Gittelman
chr3	54383358	54383647	Prabhakar:749
chr3	54834468	54834752	Prabhakar:516
chr3	55292492	55292739	Prabhakar:803
chr3	55577180	55577630	Gittelman
chr3	55613456	55613807	Bird
chr3	55662751	55662907	Pollard_2018_human_sel
chr3	56037062	56037632	Pollard_2018_human_sel*Gittelman
chr3	58810252	58810482	Bird
chr3	59297015	59297275	Prabhakar:875
chr3	59372963	59373353	Bird
chr3	59421950	59422157	Prabhakar:514*Bird*Pollard_2018_human_sel
chr3	59426359	59426618	Bird
chr3	59543972	59544367	Prabhakar:944
chr3	59577755	59577924	Bird
chr3	60269566	60269976	Pollard_2018_human_bgc
chr3	60291395	60291561	Bird
chr3	60318639	60318829	Bird
chr3	60332916	60333064	Pollard
chr3	60355875	60356048	Pollard_2018_human_sel*Bird
chr3	60544699	60544943	Prabhakar:319
chr3	60787840	60787990	Gittelman
chr3	60925761	60926062	Prabhakar:738*Pollard
chr3	60975412	60975671	Prabhakar:666
chr3	61268940	61269090	Gittelman
chr3	61445424	61445647	Prabhakar:876
chr3	62660056	62660122	Pollard_2018_human_sel
chr3	63953580	63953820	Gittelman
chr3	64165848	64165939	Bush
chr3	64190809	64190904	Pollard_2018_human_sel
chr3	64429564	64429781	Pollard_2018_human_sel
chr3	64575702	64575853	Bird
chr3	64661036	64661315	Bird
chr3	65869200	65869630	Gittelman
chr3	67458320	67458470	Gittelman
chr3	67637740	67638010	Gittelman
chr3	67750239	67750354	Prabhakar:392
chr3	67756341	67756549	Pollard_2018_human_bgc
chr3	67948153	67948696	Prabhakar:404
chr3	68113494	68113878	Bird
chr3	68193105	68193365	Bird
chr3	68683182	68683507	Bird
chr3	68971729	68971912	Prabhakar:191
chr3	69280981	69281037	Pollard_2018_human_sel
chr3	70019200	70022150	gainOverHACNE*Prabhakar:690
chr3	70046735	70047412	Bird
chr3	70299667	70300025	Bird
chr3	70351797	70352004	Prabhakar:965
chr3	70554874	70555424	Bird
chr3	70644649	70645023	Prabhakar:279
chr3	70669039	70669617	Prabhakar:868
chr3	70676745	70676868	Prabhakar:436
chr3	70778754	70779161	Bird
chr3	71353416	71354058	Pollard_2018_human_bgc
chr3	71577620	71577830	Gittelman
chr3	72939951	72940030	Pollard_2018_human_sel
chr3	73768797	73768964	Bird
chr3	76414537	76414978	Prabhakar:742
chr3	76530299	76530447	Prabhakar:376
chr3	76596941	76597249	Bird
chr3	77036140	77036479	Prabhakar:734
chr3	77220034	77220456	Bird
chr3	79137031	79137311	Bird
chr3	79448754	79448942	Prabhakar:873
chr3	79860192	79860370	Prabhakar:885
chr3	80214868	80215193	Pollard_2018_human_sel*Prabhakar:112
chr3	81210955	81211252	Bird
chr3	81267645	81267795	Gittelman
chr3	81389425	81389711	Bird
chr3	81893661	81894510	Bird
chr3	82051823	82052446	Bird
chr3	82106956	82107251	Prabhakar:310*Bird
chr3	82465858	82466217	Bird
chr3	82842752	82843097	Prabhakar:270
chr3	84650272	84650444	Prabhakar:361
chr3	85382626	85382792	Prabhakar:378
chr3	85515186	85515579	Bird
chr3	85563769	85563951	Bird
chr3	85758554	85759040	Bird
chr3	85875789	85875993	Bird
chr3	86660938	86661267	Prabhakar:580
chr3	86683570	86683906	Bird
chr3	86782877	86783023	Bird
chr3	86986760	86986990	Gittelman
chr3	87278929	87279122	Bird
chr3	87606598	87607157	Bird
chr3	87650103	87650285	Bird
chr3	87695989	87696219	Prabhakar:353*Bird
chr3	89276896	89277092	Bird
chr3	89536540	89536690	Gittelman
chr3	93707256	93707668	Bird
chr3	94037228	94037474	Bird
chr3	97313088	97313312	Prabhakar:838
chr3	97454780	97454930	Gittelman
chr3	98775636	98775747	Prabhakar:30
chr3	99375185	99375748	Prabhakar:570
chr3	99600025	99600284	Bird
chr3	99940903	99941032	Bird
chr3	101569620	101569950	Gittelman
chr3	104351589	104351897	Bird
chr3	107003264	107003458	Bird
chr3	107317832	107318292	Bird
chr3	107708877	107709273	Prabhakar:923
chr3	107724925	107725555	Prabhakar:870*Gittelman
chr3	109203037	109203269	Bird
chr3	109452942	109453306	Bird
chr3	110659867	110660004	Prabhakar:189
chr3	110700218	110700360	Bird
chr3	114135530	114136195	Bird
chr3	114137840	114138090	Gittelman
chr3	114182976	114183217	Bird
chr3	114246892	114247124	Prabhakar:787
chr3	114272938	114273302	Prabhakar:765
chr3	114304600	114305350	Gittelman
chr3	114378340	114378770	Gittelman
chr3	115650016	115650402	Bird
chr3	115905297	115905544	Prabhakar:165
chr3	116128532	116128676	Prabhakar:907
chr3	116606676	116606953	Prabhakar:879
chr3	117141860	117142032	Bird
chr3	117477287	117477668	Prabhakar:722
chr3	118540367	118540811	Prabhakar:975
chr3	119984202	119984370	Bird*Prabhakar:75
chr3	120363824	120364273	Bird
chr3	125661709	125661890	Bird
chr3	127168440	127168630	Gittelman
chr3	136479215	136479324	Bird
chr3	136855533	136856153	Bird
chr3	136988530	136989017	Bird
chr3	137020231	137020380	Prabhakar:213
chr3	137583180	137583603	Prabhakar:576
chr3	137610486	137611129	Bird
chr3	138694162	138694296	Pollard_2018_human_sel
chr3	139492300	139494200	gainOverHACNE*gainOverHACNE*Prabhakar:752
chr3	140103136	140103291	Prabhakar:489*Bird
chr3	140470521	140470692	Prabhakar:403*Bird
chr3	141883300	141883515	Gittelman
chr3	143201620	143201790	Gittelman
chr3	143388102	143388318	Bird
chr3	143391684	143391873	Pollard_2018_human_sel
chr3	143465311	143465485	Prabhakar:113
chr3	144407225	144407597	Bird
chr3	146671723	146672026	Prabhakar:80*Pollard_2018_human_sel
chr3	147239500	147239770	Gittelman
chr3	147603320	147603903	Bird
chr3	148163707	148164279	Bird
chr3	148589757	148589865	Bird
chr3	148908773	148908890	Bird
chr3	149086010	149086593	Bush
chr3	150690235	150690501	Pollard_2018_human_bgc
chr3	157212480	157213050	Gittelman
chr3	157611833	157612086	Prabhakar:655
chr3	157676146	157676497	Bird
chr3	159012253	159012489	Prabhakar:585
chr3	159359220	159359370	Gittelman
chr3	159898493	159898821	Prabhakar:127
chr3	159925086	159925305	Bird
chr3	161591784	161592084	Prabhakar:546
chr3	166182826	166183119	Prabhakar:755
chr3	166807916	166808156	Bird
chr3	167677335	167677657	Bird
chr3	168594220	168594500	Gittelman
chr3	169081986	169082829	Bird
chr3	169153575	169153857	Bird
chr3	169183228	169183611	Prabhakar:573
chr3	170819800	170820100	Gittelman
chr3	173124422	173124600	Prabhakar:323*Bird
chr3	173680516	173680913	Prabhakar:64
chr3	173820082	173820381	Bird
chr3	174031894	174032222	Pollard_2018_human_sel
chr3	174393847	174393994	Prabhakar:456
chr3	174438551	174438808	Prabhakar:668
chr3	174629632	174629905	Prabhakar:168*Pollard_2018_human_sel
chr3	174676525	174676819	Prabhakar:529
chr3	174893631	174893965	Bird
chr3	175297280	175297498	Bird
chr3	175569100	175569890	Gittelman
chr3	175671965	175672207	Prabhakar:12*Pollard_2018_human_bgc
chr3	178785140	178785410	Gittelman
chr3	180952322	180952568	Prabhakar:633
chr3	182019890	182020123	Bird
chr3	182236399	182236678	Pollard_2018_human_sel
chr3	182555637	182555812	Bird
chr3	184069290	184069608	Prabhakar:707
chr3	184396863	184396964	Pollard_2018_human_sel
chr3	185957096	185957395	Prabhakar:622*Gittelman
chr3	187628086	187628380	Prabhakar:526
chr3	187966599	187966768	Bird
chr3	188917997	188918285	Prabhakar:411
chr3	190263015	190263327	Prabhakar:539
chr3	193016310	193016495	Prabhakar:414*Bird*Pollard_2018_human_sel
chr3	193419918	193420024	Bird
chr3	193506570	193506772	Bird
chr3	193801080	193801330	Gittelman
chr3	194182863	194182967	Pollard_2018_human_bgc
chr4	1357225	1357376	Bird
chr4	1613635	1614059	Bird*Pollard*Prabhakar:33
chr4	4794040	4794190	Gittelman
chr4	10269582	10269750	Bird
chr4	11119167	11119311	Prabhakar:37
chr4	11691180	11691330	Gittelman
chr4	11870972	11871074	Pollard
chr4	11967725	11968067	Prabhakar:831
chr4	12935419	12935737	Bird
chr4	13785680	13785863	Prabhakar:941
chr4	14186522	14186593	Pollard_2018_human_sel
chr4	14619712	14619867	Prabhakar:687
chr4	14771660	14771910	Gittelman
chr4	16758780	16759210	Gittelman
chr4	16813760	16814170	Gittelman*Pollard_2018_human_sel
chr4	16973658	16973852	Bird
chr4	17022180	17022330	Gittelman
chr4	17070759	17070923	Prabhakar:432*Bird
chr4	20195240	20195950	Gittelman
chr4	22346413	22346675	Bush
chr4	22989985	22990274	Bird*Pollard_2018_human_sel
chr4	23015827	23015933	Prabhakar:314
chr4	23807875	23808339	Bird
chr4	23875671	23876149	Prabhakar:68*Pollard
chr4	23951710	23951849	Bird
[truncated: 1,117 more rows]

## Sheet: Intersection Enrichment Testing
Set	Set size (bp)	Number of Divergent Region Intersections	Number of Intersections per bp	Average Background Number of Intersections per bp	CDF Enrichment/Depletion p-value	Corrected CDF p-value	Beta-Distribution Enrichment/Depletion p-value	Beta-Distribution Enrichment/Depletion Adjusted p-value
ADULT-BIASED	67220100	83	1.23475e-06	2.98787e-06	5.50446e-05	0.000110089	7.00816e-39	4.2049e-38
OLD-BIASED	17023350	23	1.35109e-06	2.98787e-06	0.000152756	0.000229134	3.50632e-07	7.01263e-07
GM12878	16176608	29	1.79271e-06	2.98787e-06	0.0041896	0.0041896	0.00130271	0.00156325
BRAIN	144555500	639	4.42045e-06	2.98787e-06	0.00078848	0.000946176	1.72391e-14	5.17172e-14
YOUNG-BIASED	14824950	117	7.8921e-06	2.98787e-06	1.4103e-27	4.2309e-27	3.25134e-06	4.87701e-06
FETAL-BIASED	36325050	486	1.33792e-05	2.98787e-06	1.39328e-116	8.3597e-116	0.00274909	0.00274909

## Sheet: BOCA Brain
chr	start	end	HAR.chr	HAR.start	HAR.end	Nearest.Refseq.Gene	Entrez.ID	Nearest.TSS	Gene.Symbol	Gene.Description	Gene.Type	Contacts?
chr1	2928740	2929240	chr1	2928620	2929080	NM_080431	140625	-9041	ACTRT2	actin related protein T2	protein-coding	NO
chr1	3285287	3285787	chr1	3285380	3285535	NM_014448	27237	-85692	ARHGEF16	Rho guanine nucleotide exchange factor 16	protein-coding	NO
chr1	20712970	20713470	chr1	20713360	20713539	NR_033887	339505	42067	LINC01141	long intergenic non-protein coding RNA 1141	ncRNA	NO
chr1	38454866	38455366	chr1	38454639	38454995	NM_006802	10946	578	SF3A3	splicing factor 3a subunit 3	protein-coding	NO
chr1	44485080	44485580	chr1	44485147	44485404	NM_006934	6536	-2318	SLC6A9	solute carrier family 6 member 9	protein-coding	NO
chr1	44832144	44832644	chr1	44832492	44832773	NM_024066	79033	-11443	ERI3	ERI1 exoribonuclease family member 3	protein-coding	NO
chr1	45097658	45098158	chr1	45097595	45097759	NR_145816	109623472	38820	SNORD145	small nucleolar RNA- C/D box 145	snoRNA	NO
chr1	49481753	49482253	chr1	49481951	49482115	NM_024603	79656	-239362	BEND5	BEN domain containing 5	protein-coding	NO
chr1	54724918	54725418	chr1	54725380	54725670	NM_001034847	619518	23052	SSBP3-AS1	SSBP3 antisense RNA 1	ncRNA	YES
chr1	57184750	57185250	chr1	57184940	57185130	NR_135111	101929935	-74009	LOC101929935	uncharacterized LOC101929935	ncRNA	NO
chr1	63553622	63554122	chr1	63553532	63553789	NR_146605	105378769	-75730	LINC01739	long intergenic non-protein coding RNA 1739	ncRNA	NO
chr1	71662251	71662751	chr1	71662614	71663043	NR_046217	100852410	115494	ZRANB2-AS2	ZRANB2 antisense RNA 2 (head to head)	ncRNA	NO
chr1	81011318	81011818	chr1	81011420	81011570	NR_125940	101927412	10128	LINC01781	long intergenic non-protein coding RNA 1781	ncRNA	NO
chr1	81668793	81669293	chr1	81669024	81669153	NM_012302	23266	-102834	ADGRL2	adhesion G protein-coupled receptor L2	protein-coding	NO
chr1	87717942	87718442	chr1	87718160	87718430	NM_001290053	101927844	39840	LINC02801	long intergenic non-protein coding RNA 2801	protein-coding	NO
chr1	87835066	87835566	chr1	87835463	87835856	NR_038324	100505768	2022	LINC01364	long intergenic non-protein coding RNA 1364	ncRNA	NO
chr1	88624481	88624981	chr1	88624258	88624624	NM_006256	5586	-525096	PKN2	protein kinase N2	protein-coding	NO
chr1	101491178	101491678	chr1	101490800	101491270	NR_109849	102606465	26	LOC102606465	uncharacterized LOC102606465	ncRNA	NO
chr1	102540022	102540522	chr1	102540132	102540261	NM_058170	118427	-77482	OLFM3	olfactomedin 3	protein-coding	NO
chr1	103345014	103345514	chr1	103345220	103345450	NM_001854	1301	228788	COL11A1	collagen type XI alpha 1 chain	protein-coding	NO
chr1	109260448	109260948	chr1	109260560	109260850	NM_173532	163479	5168	FNDC7	fibronectin type III domain containing 7	protein-coding	NO
chr1	116854502	116855002	chr1	116854360	116854940	NM_000701	476	-61114	ATP1A1	ATPase Na+/K+ transporting subunit alpha 1	protein-coding	NO
chr1	144520871	144521371	chr1	144520764	144521012	NR_104073	101954264	-29516	RNVU1-4	RNA- variant U1 small nuclear 4	snRNA	NO
chr1	157694182	157694682	chr1	157694098	157694333	NM_052939	115352	-23873	FCRL3	Fc receptor like 3	protein-coding	NO
chr1	170717866	170718366	chr1	170717505	170717867	NM_006902	5396	84844	PRRX1	paired related homeobox 1	protein-coding	NO
chr1	175173363	175173863	chr1	175173420	175173770	NM_014656	9674	-11490	KIAA0040	KIAA0040	protein-coding	NO
chr1	176662709	176663209	chr1	176663120	176663435	NM_020318	60676	230648	PAPPA2	pappalysin 2	protein-coding	NO
chr1	183820050	183820550	chr1	183820000	183820490	NM_015149	23179	46046	RGL1	ral guanine nucleotide dissociation stimulator like 1	protein-coding	NO
chr1	203336132	203336632	chr1	203336280	203336530	NM_002023	2331	-16132	FMOD	fibromodulin	protein-coding	NO
chr1	208941496	208941996	chr1	208941241	208941707	NR_146914	105372893	39713	LINC01717	long intergenic non-protein coding RNA 1717	ncRNA	NO
chr1	209630774	209631274	chr1	209630840	209631070	NR_029622	406988	25546	MIR205	microRNA 205	ncRNA	NO
chr1	210435522	210436022	chr1	210436018	210436248	NR_024337	574036	-28542	SERTAD4-AS1	SERTAD4 antisense RNA 1	ncRNA	NO
chr1	214201881	214202381	chr1	214202295	214202547	NM_002763	5629	40255	PROX1	prospero homeobox 1	protein-coding	YES
chr1	216356420	216356920	chr1	216356754	216357348	NR_125992	102723833	110863	LOC102723833	uncharacterized LOC102723833	ncRNA	NO
chr1	216357276	216357776	chr1	216356754	216357348	NR_125992	102723833	111719	LOC102723833	uncharacterized LOC102723833	ncRNA	NO
chr1	217633688	217634188	chr1	217633637	217633841	NM_018040	55105	170494	GPATCH2	G-patch domain containing 2	protein-coding	NO
chr1	218030495	218030995	chr1	218030542	218030819	NR_048550	100885798	-35497	LINC00210	long intergenic non-protein coding RNA 210	ncRNA	NO
chr10	1709512	1710012	chr10	1709764	1709899	NM_018702	105	69957	ADARB2	adenosine deaminase RNA specific B2 (inactive)	protein-coding	NO
chr10	6771664	6772164	chr10	6772058	6772220	NR_138480	108570035	-7430	LINP1	lncRNA in non-homologous end joining pathway 1	ncRNA	NO
chr10	8794145	8794645	chr10	8794120	8794270	NR_131944	105755953	-145557	LINC02676	long intergenic non-protein coding RNA 2676	ncRNA	NO
chr10	10474032	10474532	chr10	10474238	10474501	NR_120637	101928322	30030	CELF2-DT	CELF2 divergent transript	ncRNA	NO
chr10	11077528	11078028	chr10	11077660	11078049	NM_006561	10659	17059	CELF2	CUGBP Elav-like family member 2	protein-coding	NO
chr10	14144641	14145141	chr10	14144800	14145010	NR_120638	101928453	28608	LOC101928453	uncharacterized LOC101928453	ncRNA	NO
chr10	16654282	16654782	chr10	16654584	16654741	NM_001010908	389941	-90654	C1QL3	complement C1q like 3	protein-coding	YES
chr10	16705001	16705501	chr10	16705307	16705524	NM_001010908	389941	-141373	C1QL3	complement C1q like 3	protein-coding	YES
chr10	28552400	28552900	chr10	28552440	28552755	NM_173496	143098	18402	MPP7	membrane palmitoylated protein 7	protein-coding	NO
chr10	63097765	63098265	chr10	63097900	63098298	NR_120643	101928781	-114382	TMEM26-AS1	TMEM26 antisense RNA 1	ncRNA	NO
chr10	64142434	64142934	chr10	64142575	64142747	NR_104162	283045	-7798	LOC283045	uncharacterized LOC283045	ncRNA	NO
chr10	83951357	83951857	chr10	83951776	83952132	NR_120666	101929590	41069	NRG3-AS1	NRG3 antisense RNA 1	ncRNA	NO
chr10	87769206	87769706	chr10	87769069	87769278	NR_029907	442911	255089	MIR346	microRNA 346	ncRNA	NO
chr10	92401603	92402103	chr10	92401913	92402099	NR_110657	101926942	-101291	LINC02653	long intergenic non-protein coding RNA 2653	ncRNA	NO
chr10	108786910	108787410	chr10	108787280	108787430	NM_052918	114815	137304	SORCS1	sortilin related VPS10 domain containing receptor 1	protein-coding	YES
chr10	115059102	115059602	chr10	115059144	115059319	NM_030756	6934	170322	TCF7L2	transcription factor 7 like 2	protein-coding	NO
chr10	117873476	117873976	chr10	117873800	117874030	NR_145811	109623470	80575	SNORD158	small nucleolar RNA- C/D box 158	snoRNA	NO
chr10	123913978	123914478	chr10	123914220	123914600	NM_006997	10579	-8917	TACC2	transforming acidic coiled-coil containing protein 2	protein-coding	NO
chr10	126812366	126812866	chr10	126812845	126812995	NM_001329	1488	34730	CTBP2	C-terminal binding protein 2	protein-coding	NO
chr10	132615190	132615690	chr10	132615380	132615630	NR_036180	100422867	145491	MIR378C	microRNA 378c	ncRNA	NO
chr11	8378510	8379010	chr11	8378650	8378866	NM_002315	4004	-88426	LMO1	LIM domain only 1	protein-coding	NO
chr11	14128377	14128877	chr11	14128627	14129007	NM_006108	10418	144357	SPON1	spondin 1	protein-coding	NO
chr11	15522734	15523234	chr11	15522865	15523490	NM_001293172	102724957	-142447	LOC102724957	uncharacterized LOC102724957	protein-coding	NO
chr11	17787118	17787618	chr11	17786920	17787230	NM_004976	3746	29873	KCNC1	potassium voltage-gated channel subfamily C member 1	protein-coding	YES
chr11	19902662	19903162	chr11	19902800	19902990	NR_039843	100616426	-121283	MIR4694	microRNA 4694	ncRNA	NO
chr11	22513305	22513805	chr11	22513317	22513656	NR_120583	102723378	10	LINC01495	long intergenic non-protein coding RNA 1495	ncRNA	NO
chr11	32129026	32129526	chr11	32128760	32129195	NM_002901	5954	16656	RCN1	reticulocalbin 1	protein-coding	NO
chr11	35896434	35896934	chr11	35896200	35896534	NM_174902	143458	-68847	LDLRAD3	low density lipoprotein receptor class A domain containing 3	protein-coding	NO
chr11	36101740	36102240	chr11	36101849	36101983	NR_135064	101928510	-2539	LOC101928510	uncharacterized LOC101928510	ncRNA	NO
chr11	42070810	42071310	chr11	42071022	42071245	NR_135065	101928591	35948	LINC02745	long intergenic non-protein coding RNA 2745	ncRNA	NO
chr11	42103965	42104465	chr11	42103800	42104190	NR_135065	101928591	2793	LINC02745	long intergenic non-protein coding RNA 2745	ncRNA	NO
chr11	42618134	42618634	chr11	42618379	42618711	NR_038309	100507205	-343144	LINC02740	long intergenic non-protein coding RNA 2740	ncRNA	NO
chr11	79015922	79016422	chr11	79016077	79016313	NR_030598	100126333	96981	MIR708	microRNA 708	ncRNA	NO
chr11	83420377	83420877	chr11	83420525	83422950	NM_001364	1740	-27159	DLG2	discs large MAGUK scaffold protein 2	protein-coding	NO
chr11	88908932	88909432	chr11	88908980	88909310	NM_000372	7299	-1861	TYR	tyrosinase	protein-coding	NO
chr11	91579688	91580188	chr11	91579774	91580037	NM_001008781	120114	-378262	FAT3	FAT atypical cadherin 3	protein-coding	NO
chr11	95015290	95015790	chr11	95015617	95015966	NM_144665	143686	-49901	SESN3	sestrin 3	protein-coding	NO
chr11	96831866	96832366	chr11	96831551	96831919	NR_135097	105369443	590527	LINC02737	long intergenic non-protein coding RNA 2737	ncRNA	NO
chr11	100447188	100447688	chr11	100447375	100447660	NM_032021	143872	-110581	ARHGAP42	Rho GTPase activating protein 42	protein-coding	NO
chr11	109297374	109297874	chr11	109297851	109298156	NM_207645	399947	4708	C11orf87	chromosome 11 open reading frame 87	protein-coding	NO
chr11	110951701	110952201	chr11	110951765	110952083	NR_149131	105369490	16091	LINC02550	long intergenic non-protein coding RNA 2550	ncRNA	NO
chr11	112781260	112781760	chr11	112781754	112782166	NM_000615	4684	-50632	NCAM1	neural cell adhesion molecule 1	protein-coding	NO
chr11	112781582	112782082	chr11	112781754	112782166	NM_000615	4684	-50310	NCAM1	neural cell adhesion molecule 1	protein-coding	NO
chr11	112944235	112944735	chr11	112944247	112944430	NR_120563	101928847	-110303	LOC101928847	uncharacterized LOC101928847	ncRNA	NO
chr11	114014671	114015171	chr11	114014953	114015219	NM_006006	7704	80988	ZBTB16	zinc finger and BTB domain containing 16	protein-coding	YES
chr11	114099630	114100130	chr11	114099701	114100229	NM_006169	4837	-66655	NNMT	nicotinamide N-methyltransferase	protein-coding	NO
chr11	114799000	114799500	chr11	114799193	114799383	NM_182495	120406	250001	NXPE2	neurexophilin and PC-esterase domain family member 2	protein-coding	NO
chr11	115915442	115915942	chr11	115915700	115915910	NR_034148	283143	-284774	LINC00900	long intergenic non-protein coding RNA 900	ncRNA	NO
chr11	124616466	124616966	chr11	124616780	124617190	NM_014312	23584	5435	VSIG2	V-set and immunoglobulin domain containing 2	protein-coding	NO
chr11	128346658	128347158	chr11	128346624	128346977	NM_005238	2113	45297	ETS1	ETS proto-oncogene 1- transcription factor	protein-coding	NO
chr11	131681266	131681766	chr11	131681355	131681825	NM_016522	50863	-98302	NTM	neurotrimin	protein-coding	NO
chr11	131683889	131684389	chr11	131683867	131684292	NM_016522	50863	-95679	NTM	neurotrimin	protein-coding	NO
chr11	131948136	131948636	chr11	131948475	131948847	NM_016522	50863	167674	NTM	neurotrimin	protein-coding	NO
chr11	133533272	133533772	chr11	133533771	133533927	NM_002545	4978	-131126	OPCML	opioid binding protein/cell adhesion molecule like	protein-coding	NO
chr12	1157338	1157838	chr12	1157465	1157770	NM_178039	23085	20674	ERC1	ELKS/RAB6-interacting/CAST family member 1	protein-coding	YES
chr12	12472972	12473472	chr12	12472949	12473205	NM_018050	54682	29954	MANSC1	MANSC domain containing 1	protein-coding	NO
chr12	13939589	13940089	chr12	13939816	13939908	NM_000834	2904	193451	GRIN2B	glutamate ionotropic receptor NMDA type subunit 2B	protein-coding	YES
chr12	16236724	16237224	chr12	16236954	16237124	NM_015954	51071	172708	DERA	deoxyribose-phosphate aldolase	protein-coding	NO
chr12	17290243	17290743	chr12	17290464	17290740	NR_036619	728622	148812	SKP1P2	S-phase kinase associated protein 1 pseudogene 2	pseudo	NO
chr12	17848772	17849272	chr12	17848217	17849129	NR_039770	100616279	22789	MIR3974	microRNA 3974	ncRNA	NO
chr12	18630270	18630770	chr12	18630567	18630740	NM_004570	5288	216046	PIK3C2G	phosphatidylinositol-4-phosphate 3-kinase catalytic subunit type 2 gamma	protein-coding	NO
chr12	23147065	23147565	chr12	23146450	23147449	NR_120471	101928441	-181255	LOC101928441	uncharacterized LOC101928441	ncRNA	NO
chr12	24382884	24383384	chr12	24382927	24383437	NR_120472	101928471	6929	SOX5-AS1	SOX5 antisense RNA 1	ncRNA	NO
chr12	31030347	31030847	chr12	31030298	31030498	NM_001080509	441631	-49085	TSPAN11	tetraspanin 11	protein-coding	NO
chr12	54196854	54197354	chr12	54197067	54197251	NR_104332	102216268	-46286	CISTR	chondrogenesis-associated transcript	ncRNA	NO
chr12	59287815	59288315	chr12	59287770	59288001	NM_153377	121227	25262	LRIG3	leucine rich repeats and immunoglobulin like domains 3	protein-coding	YES
chr12	60916552	60917052	chr12	60916499	60916754	NM_004731	9194	833651	SLC16A7	solute carrier family 16 member 7	protein-coding	NO
chr12	72374154	72374654	chr12	72374304	72374657	NM_173353	121278	41779	TPH2	tryptophan hydroxylase 2	protein-coding	NO
chr12	73486243	73486743	chr12	73486258	73486351	NR_110130	101928137	-66477	LINC02444	long intergenic non-protein coding RNA 2444	ncRNA	NO
chr12	78240845	78241345	chr12	78240800	78241080	NM_014903	89795	16421	NAV3	neuron navigator 3	protein-coding	NO
chr12	87612782	87613282	chr12	87612769	87613182	NR_135020	105369879	-111484	LOC105369879	uncharacterized LOC105369879	ncRNA	NO
chr12	92788230	92788730	chr12	92788500	92788870	NM_001025233	574028	-26827	CLLU1	chronic lymphocytic leukemia up-regulated 1	ncRNA	NO
chr12	99515273	99515773	chr12	99515380	99515710	NR_110095	101928937	28386	LOC101928937	uncharacterized LOC101928937	ncRNA	NO
chr12	99728194	99728694	chr12	99728061	99728336	NM_020140	56899	-179576	ANKS1B	ankyrin repeat and sterile alpha motif domain containing 1B	protein-coding	NO
chr12	102850052	102850552	chr12	102850102	102850466	NM_000618	3479	22026	IGF1	insulin like growth factor 1	protein-coding	NO
chr12	108342312	108342812	chr12	108342254	108342429	NR_037629	728739	-45014	LOC728739	programmed cell death 2 pseudogene	pseudo	NO
chr12	108876728	108877228	chr12	108876280	108876740	NR_120483	102723562	-9512	LINC01498	long intergenic non-protein coding RNA 1498	ncRNA	NO
chr12	110552106	110552606	chr12	110552150	110554900	NM_014055	28981	-9806	IFT81	intraflagellar transport 81	protein-coding	NO
chr13	34644108	34644608	chr13	34644292	34644527	NM_002915	5983	252072	RFC3	replication factor C subunit 3	protein-coding	YES
chr13	37425888	37426388	chr13	37425944	37426092	NM_000538	5994	32799	RFXAP	regulatory factor X associated protein	protein-coding	NO
chr13	40661571	40662071	chr13	40661399	40661633	NR_046870	100874127	-94125	LINC00332	long intergenic non-protein coding RNA 332	ncRNA	NO
chr13	43889723	43890223	chr13	43889632	43890052	NR_120399	100874130	-133015	ENOX1-AS2	ENOX1 antisense RNA 2	ncRNA	NO
chr13	44619123	44619623	chr13	44619366	44619586	NR_026955	121838	22902	LINC00284	long intergenic non-protein coding RNA 284	ncRNA	NO
chr13	49000895	49001395	chr13	49000892	49001249	NM_005767	10161	-101	LPAR6	lysophosphatidic acid receptor 6	protein-coding	YES
chr13	60439316	60439816	chr13	60439585	60439852	NR_046539	100874195	-147286	DIAPH3-AS1	DIAPH3 antisense RNA 1	ncRNA	NO
chr13	67462866	67463366	chr13	67462900	67463330	NR_046527	100874064	63815	PCDH9-AS2	PCDH9 antisense RNA 2	ncRNA	NO
chr13	69948003	69948503	chr13	69948245	69948439	NR_125752	103689913	151775	LINC00383	long intergenic non-protein coding RNA 383	ncRNA	NO
chr13	72212898	72213398	chr13	72212291	72213257	NM_004392	1602	228182	DACH1	dachshund family transcription factor 1	protein-coding	NO
chr13	73114848	73115348	chr13	73114822	73115533	NM_001071775	440145	186669	MZT1	mitotic spindle organizing protein 1	protein-coding	NO
chr13	80422080	80422580	chr13	80422379	80422598	NR_120413	101927195	-24391	LINC00382	long intergenic non-protein coding RNA 382	ncRNA	NO
chr13	84264365	84264865	chr13	84264323	84264479	NM_052910	114798	191913	SLITRK1	SLIT and NTRK like family member 1	protein-coding	NO
chr13	88759837	88760337	chr13	88759783	88759986	NR_131919	105370306	-35035	LINC00373	long intergenic non-protein coding RNA 373	ncRNA	NO
chr13	91137073	91137573	chr13	91137512	91138025	NR_120414	101927224	-8219	LINC01049	long intergenic non-protein coding RNA 1049	ncRNA	NO
chr13	95600160	95600660	chr13	95600140	95600795	NR_047487	100861544	-11885	LINC00557	long intergenic non-protein coding RNA 557	ncRNA	NO
chr13	96430817	96431317	chr13	96430966	96431356	NM_006260	5611	101674	DNAJC3	DnaJ heat shock protein family (Hsp40) member C3	protein-coding	YES
chr13	104796645	104797145	chr13	104796524	104796780	NR_126374	104326190	719345	LINC01309	long intergenic non-protein coding RNA 1309	ncRNA	NO
chr13	106836038	106836538	chr13	106836188	106836335	NR_034119	728192	-192624	LINC00460	long intergenic non-protein coding RNA 460	ncRNA	NO
chr13	106946982	106947482	chr13	106946998	106947126	NR_034119	728192	-81680	LINC00460	long intergenic non-protein coding RNA 460	ncRNA	NO
chr13	107001598	107002098	chr13	107001720	107002090	NR_034119	728192	-27064	LINC00460	long intergenic non-protein coding RNA 460	ncRNA	NO
chr13	110899958	110900458	chr13	110900260	110900755	NM_001845	1282	59296	COL4A1	collagen type IV alpha 1 chain	protein-coding	YES
chr14	22989178	22989678	chr14	22989334	22989546	NR_146543	105370400	36528	LINC02332	long intergenic non-protein coding RNA 2332	ncRNA	NO
chr14	24476076	24476576	chr14	24476271	24476413	NM_001082488	728635	33	DHRS4L1	dehydrogenase/reductase 4 like 1	protein-coding	NO
chr14	26643185	26643685	chr14	26642930	26643602	NM_002515	4857	379201	NOVA1	NOVA alternative splicing regulator 1	protein-coding	NO
chr14	26643513	26644013	chr14	26642930	26643602	NM_002515	4857	378873	NOVA1	NOVA alternative splicing regulator 1	protein-coding	NO
chr14	28309408	28309908	chr14	28309461	28310017	NR_148991	728755	-167231	LOC728755	uncharacterized LOC728755	ncRNA	NO
chr14	33180482	33180982	chr14	33180340	33180630	NM_022123	64067	-227353	NPAS3	neuronal PAS domain protein 3	protein-coding	YES
chr14	33196989	33197489	chr14	33197172	33197384	NM_022123	64067	-210846	NPAS3	neuronal PAS domain protein 3	protein-coding	YES
chr14	33496110	33496610	chr14	33496200	33497125	NM_022123	64067	88275	NPAS3	neuronal PAS domain protein 3	protein-coding	YES
chr14	34045107	34045607	chr14	34045569	34045772	NR_132771	106635522	-132786	SNORA89	small nucleolar RNA- H/ACA box 89	snoRNA	NO
chr14	34081168	34081668	chr14	34080969	34081176	NR_132771	106635522	-96725	SNORA89	small nucleolar RNA- H/ACA box 89	snoRNA	NO
chr14	34169316	34169816	chr14	34169525	34169955	NR_132771	106635522	-8577	SNORA89	small nucleolar RNA- H/ACA box 89	snoRNA	NO
chr14	34652699	34653199	chr14	34652755	34652982	NM_022073	112399	-232669	EGLN3	egl-9 family hypoxia inducible factor 3	protein-coding	NO
chr14	36677901	36678401	chr14	36677779	36678420	NR_049735	100886964	-32294	PTCSC3	papillary thyroid carcinoma susceptibility candidate 3	ncRNA	NO
chr14	37375057	37375557	chr14	37374831	37375087	NR_039725	100616280	46289	MIR4503	microRNA 4503	ncRNA	NO
chr14	37503874	37504374	chr14	37503736	37504441	NR_039725	100616280	-82528	MIR4503	microRNA 4503	ncRNA	NO
chr14	37608112	37608612	chr14	37608028	37608669	NR_033240	100129794	-32869	SLC25A21-AS1	SLC25A21 antisense RNA 1	ncRNA	NO
chr14	38492118	38492618	chr14	38492512	38492773	NR_135286	400208	-121039	LINC00517	long intergenic non-protein coding RNA 517	ncRNA	NO
chr14	39207118	39207618	chr14	39207332	39207595	NR_135256	105370457	-144431	LOC105370457	uncharacterized LOC105370457	ncRNA	NO
chr14	40133140	40133640	chr14	40133125	40133715	NM_203301	254170	-231686	FBXO33	F-box protein 33	protein-coding	NO
chr14	44694960	44695460	chr14	44695072	44695364	NM_032135	84075	281276	FSCB	fibrous sheath CABYR binding protein	protein-coding	NO
chr14	45034986	45035486	chr14	45034896	45035392	NR_135257	105370473	58624	LOC105370473	uncharacterized LOC105370473	ncRNA	NO
chr14	46268692	46269192	chr14	46268792	46269006	NR_146546	105370479	-84137	LINC02303	long intergenic non-protein coding RNA 2303	ncRNA	NO
chr14	61689764	61690264	chr14	61690190	61690717	NM_001017970	161291	58042	TMEM30B	transmembrane protein 30B	protein-coding	NO
chr14	62463379	62463879	chr14	62463589	62463778	NM_031914	83851	69216	SYT16	synaptotagmin 16	protein-coding	NO
chr14	66930951	66931451	chr14	66930973	66931221	NM_001004331	440184	-21888	CCDC196	coiled-coil domain containing 196	protein-coding	NO
chr14	70102819	70103319	chr14	70102660	70103430	NM_014734	9766	24756	SUSD6	sushi domain containing 6	protein-coding	NO
chr14	76288796	76289296	chr14	76288936	76289401	NM_003239	7043	159292	TGFB3	transforming growth factor beta 3	protein-coding	NO
chr14	79042142	79042642	chr14	79042230	79042431	NM_004796	9369	172330	NRXN3	neurexin 3	protein-coding	NO
chr14	79759754	79760254	chr14	79760173	79760406	NM_004796	9369	14281	NRXN3	neurexin 3	protein-coding	NO
chr14	82147778	82148278	chr14	82147741	82148057	NR_110074	101928559	-58623	LINC01467	long intergenic non-protein coding RNA 1467	ncRNA	NO
chr14	82447436	82447936	chr14	82447464	82447838	NR_146498	102724294	-238204	LINC02311	long intergenic non-protein coding RNA 2311	ncRNA	NO
chr14	85124026	85124526	chr14	85124220	85124670	NR_145983	26843	-614000	SNORD3P3	small nucleolar RNA- C/D box 3 pseudogene 3	snoRNA	NO
chr14	97553220	97553720	chr14	97553685	97553796	NR_146554	105370648	-67724	LINC02304	long intergenic non-protein coding RNA 2304	ncRNA	NO
chr14	97553682	97554182	chr14	97553685	97553796	NR_146554	105370648	-67262	LINC02304	long intergenic non-protein coding RNA 2304	ncRNA	NO
chr14	98099483	98099983	chr14	98099540	98099730	NR_033943	100129345	53262	LINC02291	long intergenic non-protein coding RNA 2291	ncRNA	NO
chr14	99502196	99502696	chr14	99502300	99502660	NM_022898	64919	236088	BCL11B	BAF chromatin remodeling complex subunit BCL11B	protein-coding	NO
chr14	99692456	99692956	chr14	99692869	99693036	NM_022898	64919	45828	BCL11B	BAF chromatin remodeling complex subunit BCL11B	protein-coding	NO
chr15	20876160	20876660	chr15	20876437	20876610	NR_027992	606	85070	NBEAP1	neurobeachin pseudogene 1	pseudo	NO
chr15	34029942	34030442	chr15	34030260	34030735	NM_012125	1133	-230506	CHRM5	cholinergic receptor muscarinic 5	protein-coding	YES
chr15	34030405	34030905	chr15	34030260	34030735	NM_012125	1133	-230043	CHRM5	cholinergic receptor muscarinic 5	protein-coding	YES
chr15	37199947	37200447	chr15	37200424	37200588	NM_001101327	145845	-21463	LOC145845	uncharacterized LOC145845	ncRNA	NO
chr15	37338236	37338736	chr15	37337864	37338383	NM_002399	4212	52411	MEIS2	Meis homeobox 2	protein-coding	NO
chr15	38063588	38064088	chr15	38063708	38064091	NM_152453	145942	-162970	TMCO5A	transmembrane and coiled-coil domains 5A	protein-coding	NO
chr15	52000066	52000566	chr15	52000282	52000453	NM_013243	29106	26616	SCG3	secretogranin III	protein-coding	YES
chr15	60667458	60667958	chr15	60667561	60667849	NM_004039	302	22477	ANXA2	annexin A2	protein-coding	NO
chr15	67678331	67678831	chr15	67678127	67678421	NM_024666	79719	-131045	AAGAB	alpha and gamma adaptin binding protein	protein-coding	NO
chr15	70306342	70306842	chr15	70306080	70306390	NR_030714	693214	65215	MIR629	microRNA 629	ncRNA	NO
chr15	71888926	71889426	chr15	71889266	71889527	NM_024817	79875	49601	THSD4	thrombospondin type 1 domain containing 4	protein-coding	NO
chr15	73290497	73290997	chr15	73290539	73290722	NM_002499	4756	-54057	NEO1	neogenin 1	protein-coding	YES
chr15	75746364	75746864	chr15	75746245	75746770	NM_015477	25942	1542	SIN3A	SIN3 transcription regulator family member A	protein-coding	NO
chr15	81822200	81822700	chr15	81822500	81822970	NM_181841	342125	-155896	TMC3	transmembrane channel like 3	protein-coding	NO
chr15	87025022	87025522	chr15	87025326	87025619	NR_046012	727915	-165073	AGBL1-AS1	AGBL1 antisense RNA 1	ncRNA	NO
chr15	88043604	88044104	chr15	88044069	88044463	NM_152454	145978	-76306	LINC00052	long intergenic non-protein coding RNA 52	ncRNA	NO
chr15	90944016	90944516	chr15	90943200	90947150	NM_003870	8826	12792	IQGAP1	IQ motif containing GTPase activating protein 1	protein-coding	NO
chr15	90945394	90945894	chr15	90943200	90947150	NM_003870	8826	14170	IQGAP1	IQ motif containing GTPase activating protein 1	protein-coding	NO
chr15	96590515	96591015	chr15	96590906	96591010	NR_158193	105369212	80305	LOC105369212	uncharacterized LOC105369212	ncRNA	NO
chr15	98195908	98196408	chr15	98196119	98196246	NR_110756	101927310	-92230	LOC101927310	uncharacterized LOC101927310	ncRNA	NO
chr15	102010680	102011180	chr15	102010900	102011355	NM_002570	5046	18980	PCSK6	proprotein convertase subtilisin/kexin type 6	protein-coding	YES
chr16	6759066	6759566	chr16	6759531	6759715	NM_018723	54715	-64494	RBFOX1	RNA binding fox-1 homolog 1	protein-coding	NO
chr16	7471986	7472486	chr16	7472259	7472645	NM_018723	54715	89390	RBFOX1	RNA binding fox-1 homolog 1	protein-coding	NO
chr16	7472446	7472946	chr16	7472259	7472645	NM_018723	54715	89850	RBFOX1	RNA binding fox-1 homolog 1	protein-coding	NO
chr16	62943504	62944004	chr16	62943298	62943793	NM_001796	1006	-873412	CDH8	cadherin 8	protein-coding	NO
chr16	64015700	64016200	chr16	64015392	64015780	NM_001797	1009	1140016	CDH11	cadherin 11	protein-coding	NO
chr16	65043714	65044214	chr16	65043720	65043870	NM_001797	1009	112002	CDH11	cadherin 11	protein-coding	NO
chr16	77126917	77127417	chr16	77127332	77127484	NM_014940	22879	-97920	MON1B	MON1 homolog B- secretory trafficking associated	protein-coding	NO
chr16	78218396	78218896	chr16	78218430	78218683	NM_016373	51741	85095	WWOX	WW domain containing oxidoreductase	protein-coding	YES
chr16	79336592	79337092	chr16	79336499	79336700	NM_005360	4094	297792	MAF	MAF bZIP transcription factor	protein-coding	NO
chr16	80079712	80080212	chr16	80079779	80080106	NR_104660	101928248	250816	LINC01229	long intergenic non-protein coding RNA 1229	ncRNA	NO
chr16	82661168	82661668	chr16	82661420	82661700	NM_001257	1012	844	CDH13	cadherin 13	protein-coding	NO
chr16	82974203	82974703	chr16	82974229	82974335	NR_110937	101928417	49450	LOC101928417	uncharacterized LOC101928417	ncRNA	NO
chr17	2141663	2142163	chr17	2141663	2142105	NM_017575	23293	-1772	SMG6	SMG6 nonsense mediated mRNA decay factor	protein-coding	NO
chr17	6063226	6063726	chr17	6063620	6063810	NM_015253	23302	89542	WSCD1	WSC domain containing 1	protein-coding	YES
chr17	42215420	42215920	chr17	42215400	42215995	NM_024032	78995	-3628	C17orf53	chromosome 17 open reading frame 53	protein-coding	NO
chr17	55675191	55675691	chr17	55675585	55675881	NR_110807	101927539	10332	LOC101927539	uncharacterized LOC101927539	ncRNA	NO
chr17	59337718	59338218	chr17	59337678	59338126	NR_136397	101927855	107097	LOC101927855	uncharacterized LOC101927855	ncRNA	NO
chr17	74908616	74909116	chr17	74908980	74909130	NM_144677	146664	40137	MGAT5B	alpha-1-6-mannosylglycoprotein 6-beta-N-acetylglucosaminyltransferase B	protein-coding	NO
chr17	75038722	75039222	chr17	75038894	75039140	NR_027058	654434	-45753	SNHG20	small nucleolar RNA host gene 20	ncRNA	NO
chr17	75778240	75778740	chr17	75778472	75778694	NR_104134	100132174	-53849	LINC01987	long intergenic non-protein coding RNA 1987	ncRNA	NO
chr17	77924429	77924929	chr17	77924863	77925031	NM_019020	125058	-27	TBC1D16	TBC1 domain family member 16	protein-coding	NO
chr18	907567	908067	chr18	907655	907710	NM_001117	116	2450	ADCYAP1	adenylate cyclase activating polypeptide 1	protein-coding	NO
chr18	1094490	1094990	chr18	1094514	1094719	NR_146724	388456	-166746	LINC01904	long intergenic non-protein coding RNA 1904	ncRNA	NO
chr18	2240249	2240749	chr18	2240380	2240610	NM_022840	64863	331005	METTL4	methyltransferase like 4	protein-coding	NO
chr18	3498964	3499464	chr18	3499005	3499550	NR_110428	100505592	32966	GAPLINC	gastric adenocarcinoma associated- positive CD44 regulator- long intergenic non-coding RNA	ncRNA	NO
chr18	4106675	4107175	chr18	4107121	4107176	NR_102696	101410534	144572	DLGAP1-AS4	DLGAP1 antisense RNA 4	ncRNA	NO
chr18	5964092	5964592	chr18	5964449	5964661	NM_001080209	645369	-68389	TMEM200C	transmembrane protein 200C	protein-coding	YES
chr18	22658082	22658582	chr18	22657985	22658150	NR_146903	105372030	-90389	LINC01894	long intergenic non-protein coding RNA 1894	ncRNA	NO
chr18	22727668	22728168	chr18	22728041	22728380	NR_146903	105372030	-159975	LINC01894	long intergenic non-protein coding RNA 1894	ncRNA	NO
chr18	22873686	22874186	chr18	22873794	22874107	NM_015461	25925	58194	ZNF521	zinc finger protein 521	protein-coding	YES
chr18	23458482	23458982	chr18	23458460	23458831	NM_005637	6760	211845	SS18	SS18 subunit of BAF chromatin remodeling complex	protein-coding	NO
chr18	23915504	23916004	chr18	23915443	23916424	NR_110762	100506787	-87205	LINC01543	long intergenic non-protein coding RNA 1543	ncRNA	NO
chr18	26175055	26175555	chr18	26175386	26175447	NM_001792	1000	-418211	CDH2	cadherin 2	protein-coding	NO
chr18	30626680	30627180	chr18	30627066	30627252	NM_020805	57565	-273944	KLHL14	kelch like family member 14	protein-coding	NO
chr18	30627098	30627598	chr18	30627066	30627252	NM_020805	57565	-274362	KLHL14	kelch like family member 14	protein-coding	NO
chr18	31164930	31165430	chr18	31165125	31165691	NM_030632	80816	6997	ASXL3	ASXL transcriptional regulator 3	protein-coding	NO
chr18	33570240	33570740	chr18	33570460	33570610	NM_031446	83608	17848	C18orf21	chromosome 18 open reading frame 21	protein-coding	NO
chr18	35248954	35249454	chr18	35249100	35249370	NR_036202	100422857	12106	MIR4318	microRNA 4318	ncRNA	NO
chr18	37255222	37255722	chr18	37254904	37255258	NR_049847	100847025	-1213	MIR5583-1	microRNA 5583-1	ncRNA	NO
chr18	37732827	37733327	chr18	37732893	37733050	NR_110791	101927900	86827	LINC01477	long intergenic non-protein coding RNA 1477	ncRNA	NO
chr18	39459282	39459782	chr18	39459640	39459781	NM_002647	5289	-75667	PIK3C3	phosphatidylinositol 3-kinase catalytic subunit type 3	protein-coding	NO
chr18	39929276	39929776	chr18	39929358	39929629	NR_046174	284260	162893	LINC00907	long intergenic non-protein coding RNA 907	ncRNA	NO
chr18	41605393	41605893	chr18	41605311	41605582	NR_110792	101927921	506019	LINC01478	long intergenic non-protein coding RNA 1478	ncRNA	NO
chr18	42871830	42872330	chr18	42871845	42872636	NM_007163	8170	79120	SLC14A2	solute carrier family 14 member 2	protein-coding	NO
chr18	42878946	42879446	chr18	42879000	42879290	NM_007163	8170	86236	SLC14A2	solute carrier family 14 member 2	protein-coding	NO
chr18	44068492	44068992	chr18	44068825	44069010	NM_144612	125336	30307	LOXHD1	lipoxygenase homology domains 1	protein-coding	YES
chr18	45734983	45735483	chr18	45735100	45735390			-14936				YES
chr18	50547582	50548082	chr18	50547654	50547833	NR_130465	100616232	-215639	MIR4528	microRNA 4528	ncRNA	NO
chr18	56578954	56579454	chr18	56578960	56579470	NM_018181	55205	47095	ZNF532	zinc finger protein 532	protein-coding	YES
chr18	65176813	65177313	chr18	65176767	65176880	NR_033921	643542	-6720	LOC643542	uncharacterized LOC643542	ncRNA	NO
chr18	68545214	68545714	chr18	68545407	68545636	NM_178506	220158	-227274	GTSCR1	Gilles de la Tourette syndrome chromosome region- candidate 1	ncRNA	NO
chr18	69663014	69663514	chr18	69663153	69663531	NR_126324	102724913	-213802	LINC01899	long intergenic non-protein coding RNA 1899	ncRNA	NO
chr18	72508996	72509496	chr18	72508477	72509506	NM_017757	55628	166327	ZNF407	zinc finger protein 407	protein-coding	NO
chr18	73256886	73257386	chr18	73257060	73257390	NM_001037331	284274	-117478	SMIM21	small integral membrane protein 21	protein-coding	NO
chr19	31154300	31154800	chr19	31154040	31154330	NM_014717	9745	291259	ZNF536	zinc finger protein 536	protein-coding	YES
chr2	111615897	111616397	chr2	111616307	111616489	NM_018308	55289	125997	ACOXL	acyl-CoA oxidase like	protein-coding	NO
chr2	114647570	114648070	chr2	114647840	114648480	NM_005721	10096	154	ACTR3	actin related protein 3	protein-coding	NO
chr2	119067616	119068116	chr2	119066625	119069475	NR_144530	100506797	-123904	THORLNC	testis associated oncogenic lncRNA	ncRNA	NO
chr2	121549395	121549895	chr2	121549253	121549552	NM_005270	2736	-212	GLI2	GLI family zinc finger 2	protein-coding	NO
chr2	121832908	121833408	chr2	121832810	121833140	NM_014553	29842	209620	TFCP2L1	transcription factor CP2 like 1	protein-coding	NO
chr2	133346603	133347103	chr2	133346893	133347089	NM_144586	116372	80925	LYPD1	LY6/PLAUR domain containing 1	protein-coding	NO
chr2	135118444	135118944	chr2	135118260	135118550	NM_002410	4249	107051	MGAT5	alpha-1-6-mannosylglycoprotein 6-beta-N-acetylglucosaminyltransferase	protein-coding	YES
chr2	137386754	137387254	chr2	137386811	137387013	NM_001080427	80731	-136111	THSD7B	thrombospondin type 1 domain containing 7B	protein-coding	NO
chr2	143682231	143682731	chr2	143682548	143682905	NM_003937	8942	47248	KYNU	kynureninase	protein-coding	NO
chr2	144332899	144333399	chr2	144332930	144333477	NR_110237	101928386	-361485	LOC101928386	uncharacterized LOC101928386	ncRNA	NO
chr2	144333404	144333904	chr2	144332930	144333477	NR_110237	101928386	-360980	LOC101928386	uncharacterized LOC101928386	ncRNA	NO
chr2	144483735	144484235	chr2	144483820	144483970	NR_110237	101928386	-210649	LOC101928386	uncharacterized LOC101928386	ncRNA	NO
chr2	146487348	146487848	chr2	146487443	146487751	NR_026904	728773	-857027	PABPC1P2	poly(A) binding protein cytoplasmic 1 pseudogene 2	pseudo	NO
chr2	146632037	146632537	chr2	146632033	146632363	NR_026904	728773	-712338	PABPC1P2	poly(A) binding protein cytoplasmic 1 pseudogene 2	pseudo	NO
chr2	147956166	147956666	chr2	147955812	147956576	NR_026904	728773	611791	PABPC1P2	poly(A) binding protein cytoplasmic 1 pseudogene 2	pseudo	NO
chr2	151644907	151645407	chr2	151644940	151645290	NR_110244	101929282	159746	LINC02612	long intergenic non-protein coding RNA 2612	ncRNA	NO
chr2	164178290	164178790	chr2	164178487	164179046	NM_018086	55137	413978	FIGN	fidgetin- microtubule severing factor	protein-coding	NO
chr2	164409636	164410136	chr2	164410054	164410373	NM_018086	55137	182632	FIGN	fidgetin- microtubule severing factor	protein-coding	NO
chr2	164972530	164973030	chr2	164972651	164973088	NM_018086	55137	-380262	FIGN	fidgetin- microtubule severing factor	protein-coding	NO
chr2	168678974	168679474	chr2	168678831	168679036	NM_020981	8708	4042	B3GALT1	beta-1-3-galactosyltransferase 1	protein-coding	NO
chr2	169426608	169427108	chr2	169426890	169427026	NR_039933	100616356	-12595	MIR4774	microRNA 4774	ncRNA	NO
chr2	169630084	169630584	chr2	169630245	169630560	NR_045786	100861402	12605	CERS6-AS1	CERS6 antisense RNA 1	ncRNA	NO
chr2	172201461	172201961	chr2	172201674	172202019	NM_024770	79828	88789	METTL8	methyltransferase like 8	protein-coding	NO
chr2	172430541	172431041	chr2	172430319	172430657	NM_024843	79901	51807	CYBRD1	cytochrome b reductase 1	protein-coding	NO
chr2	174973138	174973638	chr2	174973161	174973869	NR_136175	100128905	83380	LINC01960	long intergenic non-protein coding RNA 1960	ncRNA	NO
chr2	176435672	176436172	chr2	176435822	176436229	NM_001689	518	-389484	ATP5MC3	ATP synthase membrane subunit c locus 3	protein-coding	NO
chr2	181325330	181325830	chr2	181325445	181325674	NR_104319	101669767	-231251	SCHLAP1	SWI/SNF complex antagonist associated with prostate cancer 1	ncRNA	NO
chr2	195350906	195351406	chr2	195351180	195351330	NR_110222	101927406	142163	LINC01821	long intergenic non-protein coding RNA 1821	ncRNA	NO
chr2	199951430	199951930	chr2	199951905	199952123	NM_015265	23314	370982	SATB2	SATB homeobox 2	protein-coding	NO
chr2	202987923	202988423	chr2	202987965	202988205	NR_135243	729224	-6392	KIAA2012-AS1	KIAA2012 antisense RNA 1	ncRNA	NO
chr2	207710631	207711131	chr2	207710459	207710766	NR_036077	100422993	-62849	MIR3130-1	microRNA 3130-1	ncRNA	NO
chr2	208003449	208003949	chr2	208003340	208003890	NM_003709	8609	-4838	KLF7	Kruppel like factor 7	protein-coding	YES
chr2	212973826	212974326	chr2	212973922	212974152	NR_031643	100313771	317008	MIR548F2	microRNA 548f-2	ncRNA	NO
chr2	215442416	215442916	chr2	215442400	215442850	NR_047698	100885780	67760	VWC2L-IT1	VWC2L intronic transcript 1	ncRNA	NO
chr2	217501556	217502056	chr2	217501520	217501623	NM_000597	3485	3663	IGFBP2	insulin like growth factor binding protein 2	protein-coding	NO
chr2	218770270	218770770	chr2	218770160	218770410	NR_106867	102465485	-5169	MIR6809	microRNA 6809	ncRNA	NO
chr2	222242264	222242764	chr2	222241920	222242265	NM_004438	2043	194510	EPHA4	EPH receptor A4	protein-coding	NO
chr2	230138216	230138716	chr2	230138115	230138367	NM_017933	55022	-2463	PID1	phosphotyrosine interaction domain containing 1	protein-coding	NO
chr2	236774587	236775087	chr2	236771800	236776475	NM_001485	2637	302192	GBX2	gastrulation brain homeobox 2	protein-coding	NO
chr2	237089458	237089958	chr2	237089355	237089520	NM_001485	2637	-12679	GBX2	gastrulation brain homeobox 2	protein-coding	NO
chr2	238223824	238224324	chr2	238224260	238224490	NM_004369	1293	98733	COL6A3	collagen type VI alpha 3 chain	protein-coding	YES
chr20	5140546	5141046	chr20	5140594	5140787	NM_003818	8760	33142	CDS2	CDP-diacylglycerol synthase 2	protein-coding	YES
chr20	6955812	6956312	chr20	6955974	6956419	NM_001200	650	207729	BMP2	bone morphogenetic protein 2	protein-coding	NO
chr20	8252262	8252762	chr20	8252338	8252575	NR_046809	100874337	23161	PLCB1-IT1	PLCB1 intronic transcript 1	ncRNA	NO
chr20	8881933	8882433	chr20	8882385	8882538	NR_004386	26767	70351	RNU105B	RNA- U105B small nucleolar	snoRNA	NO
chr20	9455678	9456178	chr20	9455560	9456030	NM_012261	24141	-39077	LAMP5	lysosomal associated membrane protein family member 5	protein-coding	NO
chr20	15203264	15203764	chr20	15203727	15203910	NM_080676	140733	26028	MACROD2	mono-ADP ribosylhydrolase 2	protein-coding	NO
chr20	15203558	15204058	chr20	15203727	15203910	NM_080676	140733	26322	MACROD2	mono-ADP ribosylhydrolase 2	protein-coding	NO
chr20	40910323	40910823	chr20	40910409	40910688	NR_110004	101927159	-403550	LOC101927159	uncharacterized LOC101927159	ncRNA	NO
chr20	51981138	51981638	chr20	51981200	51981370	NM_173485	128553	179566	TSHZ2	teashirt zinc finger homeobox 2	protein-coding	NO
chr20	56846848	56847348	chr20	56846854	56847210	NM_018498	55370	37397	PPP4R1L	protein phosphatase 4 regulatory subunit 1 like (pseudogene)	pseudo	NO
chr20	56847120	56847620	chr20	56846854	56847210	NM_018498	55370	37125	PPP4R1L	protein phosphatase 4 regulatory subunit 1 like (pseudogene)	pseudo	NO
chr20	60269646	60270146	chr20	60269996	60270180	NR_147702	100128310	24908	LOC100128310	uncharacterized LOC100128310	ncRNA	NO
chr20	61733124	61733624	chr20	61733446	61733630	NR_003245	768097	297	HAR1B	highly accelerated region 1B	ncRNA	NO
chr21	16247015	16247515	chr21	16247227	16247410	NR_146322	107987295	43724	LINC02246	long intergenic non-protein coding RNA 2246	ncRNA	NO
chr21	17443316	17443816	chr21	17443380	17443790	NR_027790	388815	132	MIR99AHG	mir-99a-let-7c cluster host gene	ncRNA	NO
chr21	17828354	17828854	chr21	17828743	17828836	NR_027790	388815	35989	MIR99AHG	mir-99a-let-7c cluster host gene	ncRNA	NO
chr21	19398878	19399378	chr21	19398574	19398931	NM_024944	140578	109471	CHODL	chondrolectin	protein-coding	NO
chr21	19722202	19722702	chr21	19722097	19722403	NM_002772	5651	53650	TMPRSS15	transmembrane serine protease 15	protein-coding	NO
chr21	30331636	30332136	chr21	30331733	30332022	NM_015565	26046	33312	LTN1	listerin E3 ubiquitin protein ligase 1	protein-coding	NO
chr21	30428942	30429442	chr21	30429195	30429325	NM_006585	10694	16777	CCT8	chaperonin containing TCP1 subunit 8	protein-coding	YES
chr21	31028953	31029453	chr21	31029348	31029555	NR_033368	100379661	60843	GRIK1-AS2	GRIK1 antisense RNA 2	ncRNA	NO
chr21	34559474	34559974	chr21	34559934	34560096	NR_024102	728409	-17183	LINC01548	long intergenic non-protein coding RNA 1548	ncRNA	NO
chr21	36341179	36341679	chr21	36341100	36341590	NM_025143	80215	70294	RUNX1-IT1	RUNX1 intronic transcript 1	ncRNA	NO
chr22	42713979	42714479	chr22	42714263	42714365	NM_005650	6942	-34296	TCF20	transcription factor 20	protein-coding	NO
chr3	2137794	2138294	chr3	2137725	2138157	NM_175607	152330	-2443	CNTN4	contactin 4	protein-coding	NO
chr3	2310647	2311147	chr3	2310818	2311051	NM_175607	152330	30384	CNTN4	contactin 4	protein-coding	NO
chr3	4790218	4790718	chr3	4790328	4790561	NR_004428	100126791	2806	EGOT	eosinophil granule ontogeny transcript	ncRNA	NO
chr3	5028240	5028740	chr3	5028599	5028854	NR_037903	100507582	-6844	BHLHE40-AS1	BHLHE40 antisense RNA 1	ncRNA	NO
chr3	5467970	5468470	chr3	5467965	5468145	NR_039953	100616334	-176280	MIR4790	microRNA 4790	ncRNA	NO
chr3	7961674	7962174	chr3	7961680	7961930	NR_110131	101927394	96070	LOC101927394	uncharacterized LOC101927394	ncRNA	NO
chr3	11641914	11642414	chr3	11641980	11642395	NM_014667	9686	3891	VGLL4	vestigial like family member 4	protein-coding	NO
chr3	16925416	16925916	chr3	16923375	16928375	NM_015184	23228	-782	PLCL2	phospholipase C like 2	protein-coding	NO
chr3	16926786	16927286	chr3	16923375	16928375	NM_015184	23228	588	PLCL2	phospholipase C like 2	protein-coding	NO
chr3	20420076	20420576	chr3	20420312	20420541	NR_110814	101927829	36366	LOC101927829	uncharacterized LOC101927829	ncRNA	NO
chr3	29482036	29482536	chr3	29482120	29482455	NM_014483	27303	159483	RBMS3	RNA binding motif single stranded interacting protein 3	protein-coding	NO
chr3	34354059	34354559	chr3	34354205	34354464	NM_013374	10015	514187	PDCD6IP	programmed cell death 6 interacting protein	protein-coding	NO
chr3	58809880	58810380	chr3	58810252	58810482	NR_110820	101929238	-67	C3orf67-AS1	C3orf67 antisense RNA 1	ncRNA	NO
chr3	60975646	60976146	chr3	60975412	60975671	NM_002012	2272	261230	FHIT	fragile histidine triad diadenosine triphosphatase	protein-coding	NO
chr3	63953303	63953803	chr3	63953580	63953820	NM_000333	6314	83	ATXN7	ataxin 7	protein-coding	NO
chr3	64190642	64191142	chr3	64190809	64190904	NR_046702	100874243	17672	PRICKLE2-AS3	PRICKLE2 antisense RNA 3	ncRNA	NO
chr3	64429625	64430125	chr3	64429564	64429781	NR_110150	101929335	-117147	ADAMTS9-AS1	ADAMTS9 antisense RNA 1	ncRNA	NO
chr3	67948156	67948656	chr3	67948153	67948696	NM_213609	407738	-92328	TAFA1	TAFA chemokine like family member 1	protein-coding	NO
chr3	68192879	68193379	chr3	68193105	68193365	NM_213609	407738	139739	TAFA1	TAFA chemokine like family member 1	protein-coding	NO
chr3	70046750	70047250	chr3	70046735	70047412	NR_110000	101927152	-1895	SAMMSON	survival associated mitochondrial melanoma specific oncogenic non-coding RNA	ncRNA	NO
chr3	71353808	71354308	chr3	71353416	71354058	NM_032682	27086	-136	FOXP1	forkhead box P1	protein-coding	NO
chr3	73768824	73769324	chr3	73768797	73768964	NR_146637	105377165	-89321	LINC02005	long intergenic non-protein coding RNA 2005	ncRNA	NO
chr3	76414418	76414918	chr3	76414537	76414978	NM_001128223	100131827	-579968	ZNF717	zinc finger protein 717	protein-coding	NO
chr3	77036234	77036734	chr3	77036140	77036479	NM_002942	6092	-52766	ROBO2	roundabout guidance receptor 2	protein-coding	NO
chr3	81267791	81268291	chr3	81267645	81267795	NR_132411	728290	225022	LINC02027	long intergenic non-protein coding RNA 2027	ncRNA	NO
chr3	82052112	82052612	chr3	82051823	82052446	NR_147146	105377180	17069	LINC02008	long intergenic non-protein coding RNA 2008	ncRNA	NO
chr3	82465770	82466270	chr3	82465858	82466217	NR_147146	105377180	430727	LINC02008	long intergenic non-protein coding RNA 2008	ncRNA	NO
chr3	84650435	84650935	chr3	84650272	84650444	NR_033860	440970	268041	LINC00971	long intergenic non-protein coding RNA 971	ncRNA	NO
chr3	85515135	85515635	chr3	85515186	85515579	NM_153184	253559	-38824	CADM2	cell adhesion molecule 2	protein-coding	NO
chr3	86683418	86683918	chr3	86683570	86683906	NR_135563	101927494	152575	LINC02070	long intergenic non-protein coding RNA 2070	ncRNA	NO
chr3	86986430	86986930	chr3	86986760	86986990	NM_016206	389136	53619	VGLL3	vestigial like family member 3	protein-coding	NO
chr3	87649620	87650120	chr3	87650103	87650285	NM_000866	3355	-191986	HTR1F	5-hydroxytryptamine receptor 1F	protein-coding	NO
chr3	93707127	93707627	chr3	93707256	93707668	NM_144996	200894	8378	ARL13B	ADP ribosylation factor like GTPase 13B	protein-coding	NO
chr3	97312942	97313442	chr3	97313088	97313312	NM_173655	285220	154741	EPHA6	EPH receptor A6	protein-coding	NO
chr3	97454430	97454930	chr3	97454780	97454930	NM_032146	84100	-28685	ARL6	ADP ribosylation factor like GTPase 6	protein-coding	NO
chr3	99374947	99375447	chr3	99375185	99375748	NM_001850	1295	17759	COL8A1	collagen type VIII alpha 1 chain	protein-coding	NO
chr3	107003432	107003932	chr3	107003264	107003458	NR_028301	344595	44143	DUBR	DPPA2 upstream binding RNA	ncRNA	NO
chr3	107318008	107318508	chr3	107317832	107318292	NM_020235	56987	76449	BBX	BBX high mobility group box domain containing	protein-coding	NO
chr3	107725457	107725957	chr3	107724925	107725555	NM_001777	961	84228	CD47	CD47 molecule	protein-coding	YES
chr3	114137680	114138180	chr3	114137840	114138090	NR_121661	101929754	-34510	ZBTB20-AS5	ZBTB20 antisense RNA 5	ncRNA	NO
chr3	115650012	115650512	chr3	115650016	115650402	NR_145779	109623450	-26289	SNORD155	small nucleolar RNA- C/D box 155	snoRNA	NO
chr3	115904841	115905341	chr3	115905297	115905544	NR_109998	101926903	-173780	LSAMP-AS1	LSAMP antisense RNA 1	ncRNA	NO
chr3	116606523	116607023	chr3	116606676	116606953	NR_121607	100506724	-33505	LINC00901	long intergenic non-protein coding RNA 901	ncRNA	NO
chr3	120363944	120364444	chr3	120363824	120364273	NM_000187	3081	36892	HGD	homogentisate 1-2-dioxygenase	protein-coding	NO
chr3	136988734	136989234	chr3	136988530	136989017	NM_144717	53833	312159	IL20RB	interleukin 20 receptor subunit beta	protein-coding	NO
chr3	139493078	139493578	chr3	139492300	139494200	NM_178177	349565	-96436	NMNAT3	nicotinamide nucleotide adenylyltransferase 3	protein-coding	NO
chr3	143387930	143388430	chr3	143388102	143388318	NM_173653	285195	179130	SLC9A9	solute carrier family 9 member A9	protein-coding	NO
chr3	143391440	143391940	chr3	143391684	143391873	NM_173653	285195	175620	SLC9A9	solute carrier family 9 member A9	protein-coding	NO
chr3	146671338	146671838	chr3	146671723	146672026	NR_135560	101927866	31878	LINC02010	long intergenic non-protein coding RNA 2010	ncRNA	NO
chr3	147239332	147239832	chr3	147239500	147239770	NR_121655	440982	100468	LOC440982	uncharacterized LOC440982	ncRNA	NO
chr3	148163766	148164266	chr3	148163707	148164279	NR_146712	105374149	165338	LINC02046	long intergenic non-protein coding RNA 2046	ncRNA	NO
chr3	157211983	157212483	chr3	157212480	157213050	NM_024621	79674	1062	VEPH1	ventricular zone expressed PH domain containing 1	protein-coding	YES
chr3	157212418	157212918	chr3	157212480	157213050	NM_024621	79674	627	VEPH1	ventricular zone expressed PH domain containing 1	protein-coding	YES
chr3	157612047	157612547	chr3	157611833	157612086	NM_003030	6474	211655	SHOX2	short stature homeobox 2	protein-coding	NO
chr3	159898345	159898845	chr3	159898493	159898821	NR_108088	101928376	26284	IL12A-AS1	IL12A antisense RNA 1	ncRNA	NO
chr3	174676782	174677282	chr3	174676525	174676819	NM_207015	254827	99908	NAALADL2	N-acetylated alpha-linked acidic dipeptidase like 2	protein-coding	NO
chr3	182236265	182236765	chr3	182236399	182236678	NR_134941	105374244	-11603	LINC01995	long intergenic non-protein coding RNA 1995	ncRNA	NO
chr3	184069486	184069986	chr3	184069290	184069608	NM_004366	1181	9657	CLCN2	chloride voltage-gated channel 2	protein-coding	NO
chr3	185957034	185957534	chr3	185957096	185957395	NM_001346	1608	122739	DGKG	diacylglycerol kinase gamma	protein-coding	NO
chr3	193016242	193016742	chr3	193016310	193016495	NR_046758	100874218	-8541	ATP13A5-AS1	ATP13A5 antisense RNA 1	ncRNA	NO
chr4	4794136	4794636	chr4	4794040	4794190	NR_125892	101928279	30899	LOC101928279	uncharacterized LOC101928279	ncRNA	NO
chr4	11690966	11691466	chr4	11691180	11691330	NR_146995	105374484	79876	LINC02360	long intergenic non-protein coding RNA 2360	ncRNA	NO
chr4	13785596	13786096	chr4	13785680	13785863	NR_121681	101929071	129043	LINC01182	long intergenic non-protein coding RNA 1182	ncRNA	NO
chr4	14186066	14186566	chr4	14186522	14186593	NR_033931	152742	72724	LINC01085	long intergenic non-protein coding RNA 1085	ncRNA	NO
chr4	14771412	14771912	chr4	14771660	14771910	NR_126435	201853	118131	LINC00504	long intergenic non-protein coding RNA 504	ncRNA	NO
chr4	16758609	16759109	chr4	16758780	16759210	NM_001290	9079	141409	LDB2	LIM domain binding 2	protein-coding	NO
chr4	17022022	17022522	chr4	17022180	17022330	NM_001290	9079	-121840	LDB2	LIM domain binding 2	protein-coding	NO
chr4	22989668	22990168	chr4	22989985	22990274	NM_020973	57733	274206	GBA3	glucosylceramidase beta 3 (gene/pseudogene)	protein-coding	NO
chr4	23979477	23979977	chr4	23979680	23979930	NM_013261	10891	-88057	PPARGC1A	PPARG coactivator 1 alpha	protein-coding	NO
chr4	25822872	25823372	chr4	25823251	25823544	NM_015187	23231	41488	SEL1L3	SEL1L family member 3	protein-coding	NO
chr4	33264418	33264918	chr4	33264460	33264830	NR_125902	101928622	776847	LOC101928622	uncharacterized LOC101928622	ncRNA	NO
chr4	34720532	34721032	chr4	34720593	34720968	NR_147183	105374394	-449413	LINC02484	long intergenic non-protein coding RNA 2484	ncRNA	NO
chr4	38948036	38948536	chr4	38948180	38948430	NR_030300	693159	78633	MIR574	microRNA 574	ncRNA	NO
chr4	42150586	42151086	chr4	42150268	42150997	NM_207406	389206	3836	BEND4	BEN domain containing 4	protein-coding	NO
chr4	44068094	44068594	chr4	44068335	44068446	NR_131958	100506827	49265	LINC02475	long intergenic non-protein coding RNA 2475	ncRNA	NO
chr4	48081766	48082266	chr4	48081980	48082790	NM_003328	7294	54251	TXK	TXK tyrosine kinase	protein-coding	YES
chr4	54809786	54810286	chr4	54809800	54810210	NM_001011538	402176	43413	RPL21P44	ribosomal protein L21 pseudogene 44	pseudo	NO
chr4	58067018	58067518	chr4	58067120	58067405	NM_001553	3490	-90717	IGFBP7	insulin like growth factor binding protein 7	protein-coding	NO
chr4	58555742	58556242	chr4	58555828	58556353	NR_125907	101928851	263954	LINC02380	long intergenic non-protein coding RNA 2380	ncRNA	NO
chr4	58603805	58604305	chr4	58603835	58603996	NR_125907	101928851	312017	LINC02380	long intergenic non-protein coding RNA 2380	ncRNA	NO
chr4	63722234	63722734	chr4	63722434	63722603	NR_110595	101927186	-695001	ADGRL3-AS1	adhesion G protein-coupled receptor L3 antisense RNA 1	ncRNA	NO
chr4	79913611	79914111	chr4	79913710	79913910	NR_038342	100505875	20959	LINC01088	long intergenic non-protein coding RNA 1088	ncRNA	NO
chr4	98174760	98175260	chr4	98174790	98174901	NR_102713	101410545	-113067	STPG2-AS1	STPG2 antisense RNA 1	ncRNA	NO
chr4	99567449	99567949	chr4	99567320	99567490	NM_005723	10098	12063	TSPAN5	tetraspanin 5	protein-coding	NO
chr4	100670889	100671389	chr4	100670915	100671145	NM_014395	27071	-66845	DAPP1	dual adaptor of phosphotyrosine and 3-phosphoinositides 1	protein-coding	NO
chr4	102082380	102082880	chr4	102082560	102082810	NR_107033	102465868	79399	MIR8066	microRNA 8066	ncRNA	NO
chr4	105341932	105342432	chr4	105341940	105342490	NR_125926	101929468	-69940	CXXC4-AS1	CXXC4 antisense RNA 1	ncRNA	NO
chr4	105345980	105346480	chr4	105345660	105346230	NR_125926	101929468	-65892	CXXC4-AS1	CXXC4 antisense RNA 1	ncRNA	NO
chr4	113028931	113029431	chr4	113028904	113029290	NM_152400	132720	-37429	FAM241A	family with sequence similarity 241 member A	protein-coding	NO
chr4	114768484	114768984	chr4	114768617	114768781	NM_001221	817	-85651	CAMK2D	calcium/calmodulin dependent protein kinase II delta	protein-coding	NO
chr4	115679284	115679784	chr4	115679526	115679841	NR_030303	693162	101619	MIR577	microRNA 577	ncRNA	NO
chr4	116528444	116528944	chr4	116528646	116528751	NM_022569	64579	-493918	NDST4	N-deacetylase and N-sulfotransferase 4	protein-coding	NO
chr4	124318010	124318510	chr4	124317660	124318050	NM_005841	10252	310	SPRY1	sprouty RTK signaling antagonist 1	protein-coding	NO
chr4	130202513	130203013	chr4	130202752	130202945	NM_173487	132321	185456	C4orf33	chromosome 4 open reading frame 33	protein-coding	NO
chr4	130283754	130284254	chr4	130284088	130284451	NM_173487	132321	266697	C4orf33	chromosome 4 open reading frame 33	protein-coding	NO
chr4	130284386	130284886	chr4	130284088	130284451	NM_173487	132321	267329	C4orf33	chromosome 4 open reading frame 33	protein-coding	NO
chr4	130342566	130343066	chr4	130342362	130342587	NM_173487	132321	325509	C4orf33	chromosome 4 open reading frame 33	protein-coding	NO
chr4	131560077	131560577	chr4	131560342	131560666	NR_147186	105377420	262811	LINC02479	long intergenic non-protein coding RNA 2479	ncRNA	NO
chr4	141856326	141856826	chr4	141856440	141856690	NM_015130	23158	-179037	TBC1D9	TBC1 domain family member 9	protein-coding	NO
chr4	145570778	145571278	chr4	145571229	145571601	NM_022475	64399	3720	HHIP	hedgehog interacting protein	protein-coding	NO
chr4	145793222	145793722	chr4	145793560	145794034	NM_014885	10393	225062	ANAPC10	anaphase promoting complex subunit 10	protein-coding	NO
chr4	146403054	146403554	chr4	146401950	146406025	NM_005900	4086	-182	SMAD1	SMAD family member 1	protein-coding	NO
chr4	146404432	146404932	chr4	146401950	146406025	NM_005900	4086	725	SMAD1	SMAD family member 1	protein-coding	NO
chr4	149669114	149669614	chr4	149669498	149669965	NR_134681	105377480	194166	LOC105377480	uncharacterized LOC105377480	ncRNA	NO
chr4	153118240	153118740	chr4	153118393	153118620	NR_121627	100996286	96520	LINC02273	long intergenic non-protein coding RNA 2273	ncRNA	NO
chr4	154408545	154409045	chr4	154408995	154409108	NM_015196	23240	21283	TMEM131L	transmembrane 131 like	protein-coding	NO
chr4	155151274	155151774	chr4	155151360	155151550	NM_017639	54798	261427	DCHS2	dachsous cadherin-related 2	protein-coding	NO
chr4	157692288	157692788	chr4	157692138	157692298	NM_016205	56034	200413	PDGFC	platelet derived growth factor C	protein-coding	YES
chr4	159085974	159086474	chr4	159086087	159086309	NR_147407	285505	-5680	FAM198B-AS1	FAM198B antisense RNA 1	ncRNA	NO
chr4	165052116	165052616	chr4	165052328	165052528	NM_012403	23520	66497	ANP32C	acidic nuclear phosphoprotein 32 family member C	protein-coding	NO
chr4	178272947	178273447	chr4	178272898	178273376	NM_018248	55247	42169	NEIL3	nei like DNA glycosylase 3	protein-coding	NO
chr4	181225257	181225757	chr4	181225269	181225723	NR_033918	728081	854795	LINC00290	long intergenic non-protein coding RNA 290	ncRNA	NO
chr4	183048720	183049220	chr4	183048351	183048873	NR_027107	90768	16698	TENM3-AS1	TENM3 antisense RNA 1	ncRNA	NO
chr4	183673533	183674033	chr4	183673472	183673695	NM_001921	1635	164623	DCTD	dCMP deaminase	protein-coding	NO
chr4	183717336	183717836	chr4	183717100	183717635	NM_001921	1635	120820	DCTD	dCMP deaminase	protein-coding	NO
chr4	183717619	183718119	chr4	183717100	183717635	NM_001921	1635	120537	DCTD	dCMP deaminase	protein-coding	NO
chr4	183881864	183882364	chr4	183882146	183882366	NM_001921	1635	-43484	DCTD	dCMP deaminase	protein-coding	NO
chr4	184881966	184882466	chr4	184882413	184882487	NM_020225	56977	55756	STOX2	storkhead box 2	protein-coding	NO
chr4	189371830	189372330	chr4	189371898	189372062	NR_033869	401164	-4652	LINC01060	long intergenic non-protein coding RNA 1060	ncRNA	NO
chr5	3876348	3876848	chr5	3876254	3876515	NM_024337	79192	280652	IRX1	iroquois homeobox 1	protein-coding	NO
chr5	4570404	4570904	chr5	4570760	4571010	NR_104619	101929153	-202940	LINC02114	long intergenic non-protein coding RNA 2114	ncRNA	NO
chr5	4774030	4774530	chr5	4773850	4774412	NR_104619	101929153	686	LINC02114	long intergenic non-protein coding RNA 2114	ncRNA	NO
chr5	5539658	5540158	chr5	5539725	5540070	NM_015325	23379	117118	ICE1	interactor of little elongation complex ELL subunit 1	protein-coding	NO
chr5	9019844	9020344	chr5	9020325	9020737	NR_039779	100616326	33913	MIR4636	microRNA 4636	ncRNA	NO
chr5	13957134	13957634	chr5	13957142	13957257	NM_001369	1767	-12795	DNAH5	dynein axonemal heavy chain 5	protein-coding	YES
chr5	21335500	21336000	chr5	21335633	21338230	NM_207331	728411	-123839	GUSBP1	GUSB pseudogene 1	pseudo	NO
chr5	21336464	21336964	chr5	21335633	21338230	NM_207331	728411	-122875	GUSBP1	GUSB pseudogene 1	pseudo	NO
chr5	21925860	21926360	chr5	21926019	21926203	NM_004061	1010	-36154	CDH12	cadherin 12	protein-coding	NO
chr5	23551625	23552125	chr5	23551825	23551977	NM_020227	56979	44111	PRDM9	PR/SET domain 9	protein-coding	NO
chr5	24623019	24623519	chr5	24623160	24623450	NM_006727	1008	21818	CDH10	cadherin 10	protein-coding	NO
chr5	28215090	28215590	chr5	28215200	28215750	NR_134265	105374698	72432	LINC02103	long intergenic non-protein coding RNA 2103	ncRNA	NO
chr5	28312344	28312844	chr5	28312600	28312870	NR_134265	105374698	-24822	LINC02103	long intergenic non-protein coding RNA 2103	ncRNA	NO
chr5	29277646	29278146	chr5	29277340	29277648	NR_104628	101929681	118187	LINC02064	long intergenic non-protein coding RNA 2064	ncRNA	NO
chr5	38641044	38641544	chr5	38641161	38641416	NM_002310	3977	-45787	LIFR	LIF receptor subunit alpha	protein-coding	YES
chr5	54752256	54752756	chr5	54752080	54752400	NR_049869	100847019	52248	MIR5687	microRNA 5687	ncRNA	NO
chr5	55971815	55972315	chr5	55972024	55972398	NM_001287053	101928448	-69982	C5orf67	chromosome 5 open reading frame 67	ncRNA	NO
chr5	87776720	87777220	chr5	87776609	87777183	NR_105021	102546226	-42063	LINC02060	long intergenic non-protein coding RNA 2060	ncRNA	NO
chr5	88126173	88126673	chr5	88125994	88126264	NM_002397	4208	-3418	MEF2C	myocyte enhancer factor 2C	protein-coding	NO
chr5	88753340	88753840	chr5	88753780	88754150	NM_002397	4208	-553668	MEF2C	myocyte enhancer factor 2C	protein-coding	NO
chr5	88753820	88754320	chr5	88753780	88754150	NM_002397	4208	-554148	MEF2C	myocyte enhancer factor 2C	protein-coding	NO
chr5	92136408	92136908	chr5	92135985	92136611	NR_015369	441094	770391	NR2F1-AS1	NR2F1 antisense RNA 1	ncRNA	NO
chr5	92215849	92216349	chr5	92216309	92216451	NR_015369	441094	690950	NR2F1-AS1	NR2F1 antisense RNA 1	ncRNA	NO
chr5	102276778	102277278	chr5	102276780	102277170	NM_000919	5066	75501	PAM	peptidylglycine alpha-amidating monooxygenase	protein-coding	NO
chr5	102633732	102634232	chr5	102634000	102634317	NM_033211	90355	38857	C5orf30	chromosome 5 open reading frame 30	protein-coding	NO
chr5	115784594	115785094	chr5	115784754	115785126	NR_109879	101927233	1650	SEMA6A-AS1	SEMA6A antisense RNA 1	ncRNA	NO
chr5	117728301	117728801	chr5	117728603	117728750	NR_104609	100505811	110282	LINC02148	long intergenic non-protein coding RNA 2148	ncRNA	NO
chr5	118072446	118072946	chr5	118072208	118072526	NR_104998	102467225	140813	LINC02215	long intergenic non-protein coding RNA 2215	ncRNA	NO
chr5	119336796	119337296	chr5	119337005	119337605	NM_182761	340069	371792	FAM170A	family with sequence similarity 170 member A	protein-coding	NO
chr5	122493704	122494204	chr5	122491700	122494275	NR_146771	105379152	-67943	LOC105379152	uncharacterized LOC105379152	ncRNA	NO
chr5	122812244	122812744	chr5	122812460	122812690	NM_004384	1456	-35299	CSNK1G3	casein kinase 1 gamma 3	protein-coding	NO
chr5	124385306	124385806	chr5	124385623	124385842	NR_109882	101927421	13032	LOC101927421	uncharacterized LOC101927421	ncRNA	NO
chr5	126259975	126260475	chr5	126260294	126260501	NM_178450	115123	106025	MARCH3	membrane associated ring-CH-type finger 3	protein-coding	NO
chr5	128988174	128988674	chr5	128988040	128988310	NM_001257308	100127206	-95363	MINAR2	membrane integral NOTCH2 associated receptor 2	protein-coding	NO
chr5	146079076	146079576	chr5	146079343	146079744	NM_181674	5521	179022	PPP2R2B	protein phosphatase 2 regulatory subunit Bbeta	protein-coding	NO
chr5	149709395	149709895	chr5	149709492	149709624	NM_001012301	340075	-27177	ARSI	arylsulfatase family member I	protein-coding	NO
chr5	151945408	151945908	chr5	151945711	151945766	NM_020167	56923	-160818	NMUR2	neuromedin U receptor 2	protein-coding	NO
chr5	158202542	158203042	chr5	158202833	158203325	NM_024007	1879	322172	EBF1	EBF transcription factor 1	protein-coding	YES
chr5	158634743	158635243	chr5	158635020	158635355	NM_144726	153830	88	RNF145	ring finger protein 145	protein-coding	NO
chr5	161676508	161677008	chr5	161676305	161676551	NM_000816	2566	182110	GABRG2	gamma-aminobutyric acid type A receptor gamma2 subunit	protein-coding	NO
chr5	164259516	164260016	chr5	164259465	164260238	NR_105065	102546299	362481	LOC102546299	uncharacterized LOC102546299	ncRNA	NO
chr5	175177449	175177949	chr5	175177656	175177879	NM_006650	10814	-45837	CPLX2	complexin 2	protein-coding	NO
chr6	2111318	2111818	chr6	2111510	2111876	NM_001500	2762	64657	GMDS	GDP-mannose 4-6-dehydratase	protein-coding	NO
chr6	11607466	11607966	chr6	11607620	11608050	NM_001100829	100113407	69734	TMEM170B	transmembrane protein 170B	protein-coding	NO
chr6	16431142	16431642	chr6	16431400	16431670	NM_006877	2766	192574	GMPR	guanosine monophosphate reductase	protein-coding	NO
chr6	35027590	35028090	chr6	35027799	35028037	NM_018679	6954	81276	TCP11	t-complex 11	protein-coding	YES
chr6	38515862	38516362	chr6	38515933	38516200	NM_052893	114781	47731	BTBD9	BTB domain containing 9	protein-coding	NO
chr6	50404384	50404884	chr6	50404564	50404800	NM_172238	83741	-276623	TFAP2D	transcription factor AP-2 delta	protein-coding	NO
chr6	50431635	50432135	chr6	50431581	50432232	NM_172238	83741	-249372	TFAP2D	transcription factor AP-2 delta	protein-coding	NO
chr6	51066467	51066967	chr6	51066912	51067367	NM_003221	7021	280133	TFAP2B	transcription factor AP-2 beta	protein-coding	NO
chr6	51504863	51505363	chr6	51504840	51505250	NR_125840	101927082	18445	LOC101927082	uncharacterized LOC101927082	ncRNA	NO
chr6	55433555	55434055	chr6	55433712	55434034	NM_019036	54511	10207	HMGCLL1	3-hydroxymethyl-3-methylglutaryl-CoA lyase like 1	protein-coding	NO
chr6	57398084	57398584	chr6	57398129	57398321	NR_036097	100422884	143404	MIR548U	microRNA 548u	ncRNA	NO
chr6	57591926	57592426	chr6	57591975	57592318	NR_036097	100422884	337246	MIR548U	microRNA 548u	ncRNA	NO
chr6	64523498	64523998	chr6	64523667	64523763	NR_157848	112935969	7019	SCAT8	S-phase cancer associated transcript 8	ncRNA	NO
chr6	64770994	64771494	chr6	64771224	64771450	NR_157848	112935969	254515	SCAT8	S-phase cancer associated transcript 8	ncRNA	NO
chr6	70980331	70980831	chr6	70980385	70980615	NM_001851	1297	12319	COL9A1	collagen type IX alpha 1 chain	protein-coding	NO
chr6	73208355	73208855	chr6	73208800	73208950	NM_019842	56479	-122966	KCNQ5	potassium voltage-gated channel subfamily Q member 5	protein-coding	NO
chr6	77595382	77595882	chr6	77595560	77595820	NR_149101	105377860	-292292	LINC02540	long intergenic non-protein coding RNA 2540	ncRNA	NO
chr6	90861502	90862002	chr6	90861619	90862070	NM_021813	60468	144810	BACH2	BTB domain and CNC homolog 2	protein-coding	NO
chr6	91353989	91354489	chr6	91354220	91354467	NM_003188	6885	-57448	MAP3K7	mitogen-activated protein kinase kinase kinase 7	protein-coding	NO
chr6	93471930	93472430	chr6	93472080	93472790	NM_004440	2045	657097	EPHA7	EPH receptor A7	protein-coding	NO
chr6	94960877	94961377	chr6	94960749	94961056	NR_015362	643432	533106	TSG1	tumor suppressor TSG1	ncRNA	NO
chr6	98298356	98298856	chr6	98298514	98299052	NR_031579	100302164	-173801	MIR2113	microRNA 2113	ncRNA	NO
chr6	98946706	98947206	chr6	98946192	98946750	NR_148381	105447646	332620	PNKY	long intergenic non-protein coding RNA PNKY	ncRNA	NO
chr6	99164328	99164828	chr6	99164207	99164627	NR_148381	105447646	114998	PNKY	long intergenic non-protein coding RNA PNKY	ncRNA	NO
chr6	99425028	99425528	chr6	99424935	99425930	NM_012160	26235	-29396	FBXL4	F-box and leucine rich repeat protein 4	protein-coding	NO
chr6	99633426	99633926	chr6	99633920	99634111	NR_039672	100616347	61191	MIR548AI	microRNA 548ai	ncRNA	NO
chr6	101743967	101744467	chr6	101744148	101744422	NM_021956	2898	-102644	GRIK2	glutamate ionotropic receptor kainate type subunit 2	protein-coding	NO
chr6	102378962	102379462	chr6	102379201	102379323	NM_021956	2898	532351	GRIK2	glutamate ionotropic receptor kainate type subunit 2	protein-coding	NO
chr6	102696922	102697422	chr6	102696985	102697367	NM_021956	2898	850311	GRIK2	glutamate ionotropic receptor kainate type subunit 2	protein-coding	NO
chr6	103991598	103992098	chr6	103991456	103991959	NM_020771	57531	1315573	HACE1	HECT domain and ankyrin repeat containing E3 ubiquitin protein ligase 1	protein-coding	NO
chr6	106051889	106052389	chr6	106052103	106052293	NM_002726	5550	-201182	PREP	prolyl endopeptidase	protein-coding	NO
chr6	107989988	107990488	chr6	107989983	107990256	NM_198081	256380	63116	SCML4	Scm polycomb group protein like 4	protein-coding	NO
chr6	114696716	114697216	chr6	114696775	114696921	NM_153612	222537	-312925	HS3ST5	heparan sulfate-glucosamine 3-sulfotransferase 5	protein-coding	NO
chr6	114936165	114936665	chr6	114936579	114936699	NM_153612	222537	-552374	HS3ST5	heparan sulfate-glucosamine 3-sulfotransferase 5	protein-coding	NO
chr6	114936542	114937042	chr6	114936579	114936699	NM_153612	222537	-552751	HS3ST5	heparan sulfate-glucosamine 3-sulfotransferase 5	protein-coding	NO
chr6	120042164	120042664	chr6	120042188	120042455	NR_134600	105377975	171441	LOC105377975	uncharacterized LOC105377975	ncRNA	NO
chr6	122206885	122207385	chr6	122207200	122207444	NM_000165	2697	450343	GJA1	gap junction protein alpha 1	protein-coding	YES
chr6	140718212	140718712	chr6	140718294	140718658	NR_037441	100500879	192073	MIR3668	microRNA 3668	ncRNA	NO
chr6	140887746	140888246	chr6	140887760	140888180	NR_039675	100616180	-116955	MIR4465	microRNA 4465	ncRNA	NO
chr6	148269914	148270414	chr6	148269986	148270238	NM_015278	23328	-323300	SASH1	SAM and SH3 domain containing 1	protein-coding	YES
chr6	148524532	148525032	chr6	148524629	148524835	NM_015278	23328	-68682	SASH1	SAM and SH3 domain containing 1	protein-coding	YES
chr6	162247584	162248084	chr6	162247649	162247806	NR_134593	105378098	355825	LOC105378098	uncharacterized LOC105378098	ncRNA	NO
chr6	163148755	163149255	chr6	163149057	163149162	NM_152410	135138	3	PACRG	parkin coregulated	protein-coding	NO
chr6	164420716	164421216	chr6	164420512	164420887	NR_134620	102724152	-328450	LOC102724152	uncharacterized LOC102724152	ncRNA	NO
chr6	164984877	164985377	chr6	164984980	164985290	NR_131926	105378111	250425	MEAT6	melanoma-associated transcript 6	ncRNA	NO
chr7	2206096	2206596	chr7	2205923	2206163	NM_003550	8379	66234	MAD1L1	mitotic arrest deficient 1 like 1	protein-coding	YES
chr7	4823521	4824021	chr7	4823830	4823962	NR_039800	100616465	4499	MIR4656	microRNA 4656	ncRNA	NO
chr7	7811908	7812408	chr7	7811996	7812540	NM_002947	6119	-53920	RPA3	replication protein A3	protein-coding	NO
chr7	8418902	8419402	chr7	8418920	8419230	NM_152745	30010	-54087	NXPH1	neurexophilin 1	protein-coding	NO
chr7	8668238	8668738	chr7	8668443	8668526	NM_152745	30010	195249	NXPH1	neurexophilin 1	protein-coding	NO
chr7	11766004	11766504	chr7	11765813	11766293	NM_015204	221981	105570	THSD7A	thrombospondin type 1 domain containing 7A	protein-coding	NO
chr7	13563226	13563726	chr7	13563400	13563650	NM_004956	2115	462663	ETV1	ETS variant 1	protein-coding	NO
chr7	15255328	15255828	chr7	15255633	15255889	NM_004080	1607	-241095	DGKB	diacylglycerol kinase beta	protein-coding	NO
chr7	18332227	18332727	chr7	18332260	18332410	NM_014707	9734	2762	HDAC9	histone deacetylase 9	protein-coding	YES
chr7	19034829	19035329	chr7	19034932	19035231	NM_000474	7291	122180	TWIST1	twist family bHLH transcription factor 1	protein-coding	NO
chr7	23146419	23146919	chr7	23146520	23147230	NM_018846	55975	389	KLHL7	kelch like family member 7	protein-coding	NO
chr7	26765676	26766176	chr7	26765820	26765970	NR_161201	285941	88436	C7orf71	chromosome 7 open reading frame 71	ncRNA	NO
chr7	27740193	27740693	chr7	27740004	27740480	NM_152740	11112	-37941	HIBADH	3-hydroxyisobutyrate dehydrogenase	protein-coding	NO
chr7	31232538	31233038	chr7	31232560	31232875	NM_001118	117	140712	ADCYAP1R1	ADCYAP receptor type I	protein-coding	NO
chr7	34890741	34891241	chr7	34891157	34891328	NM_207283	404744	-17048	NPSR1-AS1	NPSR1 antisense RNA 1	ncRNA	NO
chr7	41460552	41461052	chr7	41460313	41460567	NR_027118	285954	-272715	INHBA-AS1	INHBA antisense RNA 1	ncRNA	NO
chr7	46383286	46383786	chr7	46383534	46383640	NR_134575	730338	353184	LOC730338	uncharacterized LOC730338	ncRNA	NO
chr7	69901449	69901949	chr7	69901775	69902226	NM_022479	64409	-695431	GALNT17	polypeptide N-acetylgalactosaminyltransferase 17	protein-coding	NO
chr7	89444900	89445400	chr7	89444992	89445294	NR_003551	442523	-303564	DPY19L2P4	DPY19L2 pseudogene 4	pseudo	NO
chr7	90755848	90756348	chr7	90755764	90756159	NM_003505	8321	-137650	FZD1	frizzled class receptor 1	protein-coding	YES
chr7	92875122	92875622	chr7	92875117	92875340	NM_017667	55610	13693	VPS50	VPS50 subunit of EARP/GARPII complex	protein-coding	NO
chr7	104415018	104415518	chr7	104415165	104415359	NR_034141	645591	29271	LHFPL3-AS1	LHFPL3 antisense RNA 1	ncRNA	NO
chr7	113985571	113986071	chr7	113985642	113985835	NM_014491	93986	-69049	FOXP2	forkhead box P2	protein-coding	NO
chr7	114194163	114194663	chr7	114194320	114194479	NR_037439	100500896	-98987	MIR3666	microRNA 3666	ncRNA	NO
chr7	114194403	114194903	chr7	114194320	114194479	NR_037439	100500896	-98747	MIR3666	microRNA 3666	ncRNA	NO
chr7	127294770	127295270	chr7	127295120	127295330	NM_014390	27044	2772	SND1	staphylococcal nuclease and tudor domain containing 1	protein-coding	NO
chr7	132099296	132099796	chr7	132099657	132100019	NR_134565	101928807	153926	LOC101928807	uncharacterized LOC101928807	ncRNA	NO
chr7	147556167	147556667	chr7	147556210	147556510	NR_133929	105375556	187646	LOC105375556	uncharacterized LOC105375556	ncRNA	NO
chr8	1649422	1649922	chr8	1649165	1649870	NR_134302	101927752	61828	LOC101927752	uncharacterized LOC101927752	ncRNA	NO
chr8	10234958	10235458	chr8	10234780	10235030	NR_120604	101929191	-96867	LINCR-0001	uncharacterized LINCR-0001	ncRNA	NO
chr8	13007779	13008279	chr8	13008025	13008319	NM_006094	10395	-17231	DLC1	DLC1 Rho GTPase activating protein	protein-coding	NO
chr8	13026022	13026522	chr8	13025968	13026093	NM_006094	10395	-35474	DLC1	DLC1 Rho GTPase activating protein	protein-coding	NO
chr8	13729680	13730180	chr8	13729834	13729916	NR_134450	102725080	242731	LOC102725080	uncharacterized LOC102725080	ncRNA	NO
chr8	14386728	14387228	chr8	14386849	14387014	NR_029875	494332	324041	MIR383	microRNA 383	ncRNA	NO
chr8	15095593	15096093	chr8	15095428	15095812	NM_139167	137868	97	SGCZ	sarcoglycan zeta	protein-coding	NO
chr8	18438216	18438716	chr8	18438200	18438710	NM_000015	10	189674	NAT2	N-acetyltransferase 2	protein-coding	NO
chr8	18518412	18518912	chr8	18518394	18518475	NM_015310	23362	147715	PSD3	pleckstrin and Sec7 domain containing 3	protein-coding	NO
chr8	18579574	18580074	chr8	18579571	18579807	NM_015310	23362	86553	PSD3	pleckstrin and Sec7 domain containing 3	protein-coding	NO
chr8	20676894	20677394	chr8	20676818	20677049	NR_130773	102467222	-134000	LOC102467222	uncharacterized LOC102467222	ncRNA	NO
chr8	20834900	20835400	chr8	20834854	20834988	NR_033894	286114	3653	LINC02153	long intergenic non-protein coding RNA 2153	ncRNA	NO
chr8	26087884	26088384	chr8	26087760	26088020	NM_002717	5520	-60890	PPP2R2A	protein phosphatase 2 regulatory subunit Balpha	protein-coding	NO
chr8	26776309	26776809	chr8	26776127	26776411	NM_000680	148	-51764	ADRA1A	adrenoceptor alpha 1A	protein-coding	YES
chr8	28165572	28166072	chr8	28165814	28165966	NM_006228	5368	-8963	PNOC	prepronociceptin	protein-coding	NO
chr8	40685654	40686154	chr8	40685729	40685980	NM_024645	79698	69441	ZMAT4	zinc finger matrin-type 4	protein-coding	YES
chr8	47502525	47503025	chr8	47502953	47503058	NR_146077	389652	26490	ASNSP1	asparagine synthetase pseudogene 1	pseudo	NO
chr8	50968880	50969380	chr8	50969280	50969870	NM_018967	54212	-107561	SNTG1	syntrophin gamma 1	protein-coding	NO
chr8	56805552	56806052	chr8	56805800	56806060	NR_145767	109617001	9612	SNORA1B	small nucleolar RNA- H/ACA box 1B	snoRNA	NO
chr8	58779308	58779808	chr8	58779560	58779890	NR_130934	100505477	-111359	LINC01602	long intergenic non-protein coding RNA 1602	ncRNA	NO
chr8	62006329	62006829	chr8	62006300	62006670	NR_034003	100130298	-126272	LOC100130298	hCG1816373-like	ncRNA	NO
chr8	65858289	65858789	chr8	65858779	65859320	NM_004820	9420	-147245	CYP7B1	cytochrome P450 family 7 subfamily B member 1	protein-coding	NO
chr8	72094256	72094756	chr8	72094400	72094550	NM_000503	2138	174435	EYA1	EYA transcriptional coactivator and phosphatase 1	protein-coding	NO
chr8	73276317	73276817	chr8	73276420	73276697	NR_033867	392232	-112698	LOC392232	transient receptor potential cation channel subfamily A member 1 pseudogene	pseudo	NO
chr8	77282610	77283110	chr8	77282838	77283178	NR_105006	101926978	-36029	LINC01111	long intergenic non-protein coding RNA 1111	ncRNA	NO
chr8	77946282	77946782	chr8	77946438	77946870	NM_000318	5828	-33252	PEX2	peroxisomal biogenesis factor 2	protein-coding	NO
chr8	81724308	81724808	chr8	81724496	81724679	NM_032651	619279	62145	ZNF704	zinc finger protein 704	protein-coding	YES
chr8	89128457	89128957	chr8	89128940	89129090	NM_005941	4325	211005	MMP16	matrix metallopeptidase 16	protein-coding	NO
chr8	90644598	90645098	chr8	90644442	90644748	NR_125822	101929709	125091	LOC101929709	uncharacterized LOC101929709	ncRNA	NO
chr8	92020763	92021263	chr8	92020860	92021350	NM_001190972	100127983	-23547	C8orf88	chromosome 8 open reading frame 88	protein-coding	NO
chr8	92543396	92543896	chr8	92543487	92543632	NM_052832	115111	282099	SLC26A7	solute carrier family 26 member 7	protein-coding	NO
chr8	93115228	93115728	chr8	93115000	93115270	NM_004349	862	-24	RUNX1T1	RUNX1 partner transcriptional co-repressor 1	protein-coding	NO
chr8	93552010	93552510	chr8	93551968	93552115	NR_125827	102724710	115462	LOC102724710	uncharacterized LOC102724710	ncRNA	NO
chr8	100886255	100886755	chr8	100886315	100886546	NM_004374	1345	19430	COX6C	cytochrome c oxidase subunit 6C	protein-coding	NO
chr8	105365330	105365830	chr8	105365587	105365852	NM_030788	81501	13526	DCSTAMP	dendrocyte expressed seven transmembrane protein	protein-coding	NO
chr8	116715059	116715559	chr8	116714600	116715110	NM_014112	7227	-34107	TRPS1	transcriptional repressor GATA binding 1	protein-coding	NO
chr8	117022521	117023021	chr8	117022456	117022815	NR_046215	100859921	314526	LINC00536	long intergenic non-protein coding RNA 536	ncRNA	NO
chr8	122796533	122797033	chr8	122796775	122797067	NM_005328	3037	-143103	HAS2	hyaluronan synthase 2	protein-coding	NO
chr8	123171371	123171871	chr8	123171497	123171668	NR_131202	105375734	409262	SMILR	smooth muscle induced lncRNA- enhancer of proliferation	ncRNA	NO
chr8	135421444	135421944	chr8	135421560	135421710	NR_002438	594840	-188620	ZFAT-AS1	ZFAT antisense RNA 1	ncRNA	NO
chr8	136628627	136629127	chr8	136628657	136628922	NM_006558	10656	159178	KHDRBS3	KH RNA binding domain containing- signal transduction associated 3	protein-coding	NO
chr9	2015845	2016345	chr9	2015947	2016072	NM_003070	6595	748	SMARCA2	SWI/SNF related- matrix associated- actin dependent regulator of chromatin- subfamily a- member 2	protein-coding	YES
chr9	2159852	2160352	chr9	2159560	2160390	NM_003070	6595	1646	SMARCA2	SWI/SNF related- matrix associated- actin dependent regulator of chromatin- subfamily a- member 2	protein-coding	YES
chr9	2241725	2242225	chr9	2241880	2242215	NM_003070	6595	83519	SMARCA2	SWI/SNF related- matrix associated- actin dependent regulator of chromatin- subfamily a- member 2	protein-coding	YES
chr9	2623238	2623738	chr9	2623240	2623780	NR_015375	401491	-1115	VLDLR-AS1	VLDLR antisense RNA 1	ncRNA	NO
chr9	3268150	3268650	chr9	3268156	3268468	NR_121585	101929247	86811	LINC01231	long intergenic non-protein coding RNA 1231	ncRNA	NO
chr9	3856001	3856501	chr9	3856422	3856797	NM_032764	84850	-42395	GLIS3-AS1	GLIS3 antisense RNA 1	ncRNA	NO
chr9	3968896	3969396	chr9	3968883	3969210	NM_032764	84850	70500	GLIS3-AS1	GLIS3 antisense RNA 1	ncRNA	NO
chr9	7689494	7689994	chr9	7689772	7689991	NM_033428	90871	110034	DMAC1	distal membrane arm assembly complex 1	protein-coding	NO
chr9	8284708	8285208	chr9	8284910	8285048	NM_002839	5789	448988	PTPRD	protein tyrosine phosphatase receptor type D	protein-coding	NO
chr9	8784039	8784539	chr9	8784020	8784350	NM_002839	5789	-50343	PTPRD	protein tyrosine phosphatase receptor type D	protein-coding	NO
chr9	10542029	10542529	chr9	10542241	10542390	NM_002839	5789	70723	PTPRD	protein tyrosine phosphatase receptor type D	protein-coding	NO
chr9	11704624	11705124	chr9	11704666	11704754	NM_000550	7306	-988511	TYRP1	tyrosinase related protein 1	protein-coding	NO
chr9	13750819	13751319	chr9	13751079	13751218	NR_038194	100113404	-176901	LINC00583	long intergenic non-protein coding RNA 583	ncRNA	NO
chr9	13755440	13755940	chr9	13755620	13756187	NR_038194	100113404	-172280	LINC00583	long intergenic non-protein coding RNA 583	ncRNA	NO
chr9	14531091	14531591	chr9	14531525	14531730	NM_005596	4781	734	NFIB	nuclear factor I B	protein-coding	NO
chr9	16584909	16585409	chr9	16585371	16585731	NR_151723	111216284	-141653	BNC2-AS1	BNC2 antisense RNA 1	ncRNA	NO
chr9	16626721	16627221	chr9	16626841	16627182	NR_151723	111216284	-99841	BNC2-AS1	BNC2 antisense RNA 1	ncRNA	NO
chr9	16830754	16831254	chr9	16830880	16831150	NM_017637	54796	39664	BNC2	basonuclin 2	protein-coding	NO
chr9	24354272	24354772	chr9	24354034	24354417	NM_001271706	100129669	191152	IZUMO3	IZUMO family member 3	protein-coding	YES
chr9	26210416	26210916	chr9	26210531	26210896	NM_001004352	100506422	143993	LOC100506422	putative deoxyuridine 5'-triphosphate nucleotidohydrolase-like protein FLJ16323	protein-coding	NO
chr9	26219776	26220276	chr9	26219938	26220248	NM_001004352	100506422	153353	LOC100506422	putative deoxyuridine 5'-triphosphate nucleotidohydrolase-like protein FLJ16323	protein-coding	NO
chr9	31023936	31024436	chr9	31023953	31024223	NR_135134	101929620	357302	LINC01243	long intergenic non-protein coding RNA 1243	ncRNA	NO
chr9	32192963	32193463	chr9	32193060	32193305	NM_002197	48	-191388	ACO1	aconitase 1	protein-coding	NO
chr9	71819724	71820224	chr9	71819680	71820175	NM_004817	9414	47	TJP2	tight junction protein 2	protein-coding	YES
chr9	80454733	80455233	chr9	80454869	80454997	NM_002072	2776	191744	GNAQ	G protein subunit alpha q	protein-coding	NO
chr9	81090620	81091120	chr9	81090867	81091041	NM_021154	29968	178829	PSAT1	phosphoserine aminotransferase 1	protein-coding	YES
chr9	82225830	82226330	chr9	82225960	82226320	NM_007005	7091	37988	TLE4	TLE family member 4- transcriptional corepressor	protein-coding	YES
chr9	82282704	82283204	chr9	82283020	82283350	NM_007005	7091	94862	TLE4	TLE family member 4- transcriptional corepressor	protein-coding	YES
chr9	82394782	82395282	chr9	82394840	82395230	NR_121212	101927477	-44413	LINC01507	long intergenic non-protein coding RNA 1507	ncRNA	NO
chr9	82395161	82395661	chr9	82394840	82395230	NR_121212	101927477	-44034	LINC01507	long intergenic non-protein coding RNA 1507	ncRNA	NO
chr9	82517428	82517928	chr9	82517647	82518323	NR_121212	101927477	-72260	LINC01507	long intergenic non-protein coding RNA 1507	ncRNA	NO
chr9	82551004	82551504	chr9	82551090	82551543	NR_121212	101927477	-38684	LINC01507	long intergenic non-protein coding RNA 1507	ncRNA	NO
chr9	98811129	98811629	chr9	98811345	98812075	NR_033838	158435	-16742	LOC158435	uncharacterized LOC158435	ncRNA	NO
chr9	102494613	102495113	chr9	102495040	102495410	NR_109802	101928438	87308	LOC101928438	uncharacterized LOC101928438	ncRNA	NO
chr9	109378244	109378744	chr9	109378256	109378583	NR_104145	100996590	155	LINC01505	long intergenic non-protein coding RNA 1505	ncRNA	NO
chr9	121084023	121084523	chr9	121084020	121084397	NR_151725	111216287	-357676	LINC02578	long intergenic non-protein coding RNA 2578	ncRNA	NO
chr9	128906358	128906858	chr9	128906852	128907165	NR_121584	101929116	131586	LOC101929116	uncharacterized LOC101929116	ncRNA	NO
chrX	25401264	25401764	chrX	25400759	25401844	NM_139058	170302	-367432	ARX	aristaless related homeobox	protein-coding	NO
chrX	31206020	31206520	chrX	31206218	31206399	NM_000109	1756	78801	DMD	dystrophin	protein-coding	NO
chrX	40731226	40731726	chrX	40731475	40731706	NR_027761	100132831	-39027	LOC100132831	A20-binding inhibitor of NF-kappaB activation 2 pseudogene	pseudo	NO
chrX	41510246	41510746	chrX	41510360	41510510	NM_005300	2857	-37730	GPR34	G protein-coupled receptor 34	protein-coding	NO
chrX	41906922	41907422	chrX	41906833	41907062	NM_003688	8573	-124365	CASK	calcium/calmodulin dependent serine protein kinase	protein-coding	NO
chrX	100000737	100001237	chrX	100001199	100001549	NM_080737	94121	-13879	SYTL4	synaptotagmin like 4	protein-coding	NO
chrX	100001181	100001681	chrX	100001199	100001549	NM_080737	94121	-14323	SYTL4	synaptotagmin like 4	protein-coding	NO
chrX	123769982	123770482	chrX	123769547	123770322	NM_002351	4068	290100	SH2D1A	SH2 domain containing 1A	protein-coding	NO
chrX	132496460	132496960	chrX	132496592	132496843	NM_001448	2239	52807	GPC4	glypican 4	protein-coding	NO
chrX	137792382	137792882	chrX	137792645	137793565	NM_004114	2258	1247	FGF13	fibroblast growth factor 13	protein-coding	NO
chrX	143707244	143707744	chrX	143707199	143707734	NM_001009614	494118	-621529	SPANXN1	SPANX family member N1	protein-coding	NO
chrX	154998106	154998606	chrX	154998125	154998414	NM_005840	10251	959	SPRY3	sprouty RTK signaling antagonist 3	protein-coding	NO

## Sheet: YOUNG-BIASED
chr	start	end	HAR.chr	HAR.start	HAR.end	Nearest.Refseq.Gene	Entrez.ID	Nearest.TSS	Gene.Symbol	Gene.Description	Gene.Type	Contacts?
chr1	10588911	10589061	chr1	10588930	10589267	NM_004565	5195	53979	PEX14	peroxisomal biogenesis factor 14	protein-coding	NO
chr1	10773173	10773323	chr1	10773091	10773533	NM_017766	54897	83455	CASZ1	castor zinc finger 1	protein-coding	NO
chr1	31267939	31268089	chr1	31267948	31268008	NR_146732	105378622	-29485	LINC01778	long intergenic non-protein coding RNA 1778	ncRNA	NO
chr1	64590749	64590899	chr1	64590698	64591196	NR_110665	101927034	-11350	ROR1-AS1	ROR1 antisense RNA 1	ncRNA	NO
chr1	82270183	82270333	chr1	82270209	82270343	NM_012302	23266	2120	ADGRL2	adhesion G protein-coupled receptor L2	protein-coding	NO
chr1	87835389	87835539	chr1	87835463	87835856	NR_038324	100505768	1874	LINC01364	long intergenic non-protein coding RNA 1364	ncRNA	NO
chr1	204900523	204900673	chr1	204900579	204900750	NM_015090	23114	-12756	NFASC	neurofascin	protein-coding	YES
chr1	245389005	245389155	chr1	245389034	245389269	NR_151721	111216275	8739	KIF26B-AS1	KIF26B antisense RNA 1	ncRNA	NO
chr10	3324408	3324558	chr10	3324160	3324450	NR_131187	105376360	-36404	LOC105376360	uncharacterized LOC105376360	ncRNA	NO
chr10	14233497	14233647	chr10	14233546	14233781	NR_120638	101928453	117289	LOC101928453	uncharacterized LOC101928453	ncRNA	NO
chr10	16500419	16500569	chr10	16500290	16500553	NM_030664	9317	21552	PTER	phosphotriesterase related	protein-coding	YES
chr10	63097893	63098043	chr10	63097900	63098298	NR_120643	101928781	-114429	TMEM26-AS1	TMEM26 antisense RNA 1	ncRNA	NO
chr10	122945719	122945869	chr10	122945673	122946002	NM_018117	55717	334920	WDR11	WD repeat domain 11	protein-coding	NO
chr10	123268553	123268703	chr10	123268680	123268930	NM_000141	2263	22200	FGFR2	fibroblast growth factor receptor 2	protein-coding	NO
chr10	123914140	123914290	chr10	123914220	123914600	NM_006997	10579	-8930	TACC2	transforming acidic coiled-coil containing protein 2	protein-coding	NO
chr10	130844333	130844483	chr10	130844170	130844412	NR_148990	728327	133311	LINC02667	long intergenic non-protein coding RNA 2667	ncRNA	NO
chr10	131754671	131754821	chr10	131754168	131754688	NM_001005463	253738	7792	EBF3	EBF transcription factor 3	protein-coding	NO
chr11	8378831	8378981	chr11	8378650	8378866	NM_002315	4004	-88572	LMO1	LIM domain only 1	protein-coding	NO
chr11	86299773	86299923	chr11	86299520	86299880	NM_006680	10873	83392	ME3	malic enzyme 3	protein-coding	NO
chr11	114099724	114099874	chr11	114099701	114100229	NM_006169	4837	-66736	NNMT	nicotinamide N-methyltransferase	protein-coding	NO
chr11	124527681	124527831	chr11	124527693	124527929	NM_018978	54414	15879	SIAE	sialic acid acetylesterase	protein-coding	NO
chr11	125063105	125063255	chr11	125063060	125063290	NM_022062	63876	28533	PKNOX2	PBX/knotted 1 homeobox 2	protein-coding	YES
chr12	1157371	1157521	chr12	1157465	1157770	NM_178039	23085	20532	ERC1	ELKS/RAB6-interacting/CAST family member 1	protein-coding	YES
chr12	12473079	12473229	chr12	12472949	12473205	NM_018050	54682	30022	MANSC1	MANSC domain containing 1	protein-coding	NO
chr12	13939901	13940051	chr12	13939816	13939908	NM_000834	2904	193314	GRIN2B	glutamate ionotropic receptor NMDA type subunit 2B	protein-coding	YES
chr12	89743707	89743857	chr12	89743565	89743941	NM_001946	1848	2496	DUSP6	dual specificity phosphatase 6	protein-coding	NO
chr12	114844965	114845115	chr12	114845100	114845780	NM_000192	6910	777	TBX5	T-box transcription factor 5	protein-coding	NO
chr13	53718519	53718669	chr13	53718154	53718798	NR_125788	102723875	7441	LINC01065	long intergenic non-protein coding RNA 1065	ncRNA	NO
chr13	75540951	75541101	chr13	75540774	75541131	NR_027466	647288	273491	CTAGE11P	CTAGE family member 11- pseudogene	pseudo	NO
chr13	91137758	91137908	chr13	91137512	91138025	NR_120414	101927224	-7709	LINC01049	long intergenic non-protein coding RNA 1049	ncRNA	NO
chr13	92972893	92973043	chr13	92972675	92972936	NR_120382	100873970	31492	GPC5-AS2	GPC5 antisense RNA 2	ncRNA	NO
chr14	28309653	28309803	chr14	28309461	28310017	NR_148991	728755	-167301	LOC728755	uncharacterized LOC728755	ncRNA	NO
chr14	32346677	32346827	chr14	32346360	32346890	NR_146544	105370439	-67307	LINC02313	long intergenic non-protein coding RNA 2313	ncRNA	NO
chr14	36677680	36677830	chr14	36677779	36678420	NR_049735	100886964	-31898	PTCSC3	papillary thyroid carcinoma susceptibility candidate 3	ncRNA	NO
chr14	40133336	40133486	chr14	40133125	40133715	NM_203301	254170	-231707	FBXO33	F-box protein 33	protein-coding	NO
chr14	48843263	48843413	chr14	48843159	48843565	NR_039996	100506433	-579121	LINC00648	long intergenic non-protein coding RNA 648	ncRNA	NO
chr14	70103125	70103275	chr14	70102660	70103430	NM_014734	9766	24887	SUSD6	sushi domain containing 6	protein-coding	NO
chr14	82158457	82158607	chr14	82158268	82158653	NR_146498	102724294	50950	LINC02311	long intergenic non-protein coding RNA 2311	ncRNA	NO
chr15	96952371	96952521	chr15	96952460	96953100	NM_021005	7026	75452	NR2F2	nuclear receptor subfamily 2 group F member 2	protein-coding	NO
chr16	8030159	8030309	chr16	8030037	8030429	NM_001146336	283953	557594	TMEM114	transmembrane protein 114	protein-coding	NO
chr16	62943161	62943311	chr16	62943298	62943793	NM_001796	1006	-872894	CDH8	cadherin 8	protein-coding	NO
chr16	73129679	73129829	chr16	73129256	73129722	NM_001101347	283902	3506	HCCAT5	hepatocellular carcinoma associated transcript 5	ncRNA	NO
chr16	78218341	78218491	chr16	78218430	78218683	NM_016373	51741	84865	WWOX	WW domain containing oxidoreductase	protein-coding	YES
chr17	9350060	9350210	chr17	9350158	9350561	NM_004853	9482	129002	STX8	syntaxin 8	protein-coding	NO
chr17	59337947	59338097	chr17	59337678	59338126	NR_136397	101927855	107043	LOC101927855	uncharacterized LOC101927855	ncRNA	NO
chr17	71800311	71800461	chr17	71800180	71800755	NR_040020	400620	17425	LINC02092	long intergenic non-protein coding RNA 2092	ncRNA	NO
chr17	77924992	77925142	chr17	77924863	77925031	NM_019020	125058	-415	TBC1D16	TBC1 domain family member 16	protein-coding	NO
chr18	3499365	3499515	chr18	3499005	3499550	NR_110428	100505592	33192	GAPLINC	gastric adenocarcinoma associated- positive CD44 regulator- long intergenic non-coding RNA	ncRNA	NO
chr18	23916036	23916186	chr18	23915443	23916424	NR_110762	100506787	-86848	LINC01543	long intergenic non-protein coding RNA 1543	ncRNA	NO
chr18	41605462	41605612	chr18	41605311	41605582	NR_110792	101927921	506125	LINC01478	long intergenic non-protein coding RNA 1478	ncRNA	NO
chr18	56579349	56579499	chr18	56578960	56579470	NM_018181	55205	47315	ZNF532	zinc finger protein 532	protein-coding	YES
chr18	76190352	76190502	chr18	76190067	76190551	NR_104127	101927715	-484744	LINC01029	long intergenic non-protein coding RNA 1029	ncRNA	NO
chr19	34857845	34857995	chr19	34857520	34858080	NM_000175	2821	1819	GPI	glucose-6-phosphate isomerase	protein-coding	NO
chr19	38554155	38554305	chr19	38554096	38554292	NR_145800	109623473	-99506	SNORD152	small nucleolar RNA- C/D box 152	snoRNA	NO
chr2	21676859	21677009	chr2	21676287	21676953	NR_038837	645949	256590	LINC01822	long intergenic non-protein coding RNA 1822	ncRNA	NO
chr2	151478211	151478361	chr2	151478040	151478710	NR_110244	101929282	-7125	LINC02612	long intergenic non-protein coding RNA 2612	ncRNA	NO
chr2	171679383	171679533	chr2	171679517	171679721	NM_000817	2571	6061	GAD1	glutamate decarboxylase 1	protein-coding	NO
chr2	176943525	176943675	chr2	176943110	176943744	NM_001080458	344191	5090	EVX2	even-skipped homeobox 2	protein-coding	NO
chr2	201038083	201038233	chr2	201038051	201038500	NM_015535	26010	-132444	SPATS2L	spermatogenesis associated serine rich 2 like	protein-coding	YES
chr2	202988025	202988175	chr2	202987965	202988205	NR_135243	729224	-6319	KIAA2012-AS1	KIAA2012 antisense RNA 1	ncRNA	NO
chr2	230138175	230138325	chr2	230138115	230138367	NM_017933	55022	-2247	PID1	phosphotyrosine interaction domain containing 1	protein-coding	NO
chr20	56846929	56847079	chr20	56846854	56847210	NM_018498	55370	37491	PPP4R1L	protein phosphatase 4 regulatory subunit 1 like (pseudogene)	pseudo	NO
chr20	61733619	61733769	chr20	61733446	61733630	NR_003245	768097	-23	HAR1B	highly accelerated region 1B	ncRNA	NO
chr22	28145197	28145347	chr22	28145200	28145355	NM_002430	4330	52472	MN1	MN1 proto-oncogene- transcriptional regulator	protein-coding	YES
chr3	609535	609685	chr3	609533	609805	NR_110118	101927215	-24178	LINC01266	long intergenic non-protein coding RNA 1266	ncRNA	NO
chr3	2681837	2681987	chr3	2681614	2681842	NM_175607	152330	-251987	CNTN4	contactin 4	protein-coding	NO
chr3	16927783	16927933	chr3	16923375	16928375	NM_015184	23228	1410	PLCL2	phospholipase C like 2	protein-coding	NO
chr3	65869377	65869527	chr3	65869200	65869630	NR_046575	100873983	-10039	MAGI1-AS1	MAGI1 antisense RNA 1	ncRNA	NO
chr3	85758818	85758968	chr3	85758554	85759040	NM_153184	253559	-16739	CADM2	cell adhesion molecule 2	protein-coding	NO
chr3	114137929	114138079	chr3	114137840	114138090	NR_121661	101929754	-34436	ZBTB20-AS5	ZBTB20 antisense RNA 5	ncRNA	NO
chr3	182555646	182555796	chr3	182555637	182555812	NM_014616	23200	44429	ATP11B	ATPase phospholipid transporting 11B (putative)	protein-coding	NO
chr3	184396881	184397031	chr3	184396863	184396964	NM_022149	64110	32896	MAGEF1	MAGE family member F1	protein-coding	NO
chr3	185957171	185957321	chr3	185957096	185957395	NM_001346	1608	122777	DGKG	diacylglycerol kinase gamma	protein-coding	NO
chr4	20195743	20195893	chr4	20195240	20195950	NM_004787	9353	-57710	SLIT2	slit guidance ligand 2	protein-coding	NO
chr4	26208342	26208492	chr4	26208233	26208506	NM_005349	3516	-112915	RBPJ	recombination signal binding protein for immunoglobulin kappa J region	protein-coding	NO
chr4	42150417	42150567	chr4	42150268	42150997	NM_207406	389206	4180	BEND4	BEN domain containing 4	protein-coding	NO
chr4	54810095	54810245	chr4	54809800	54810210	NM_001011538	402176	43279	RPL21P44	ribosomal protein L21 pseudogene 44	pseudo	NO
chr4	58363319	58363469	chr4	58363425	58364875	NR_125907	101928851	71356	LINC02380	long intergenic non-protein coding RNA 2380	ncRNA	NO
chr4	130283999	130284149	chr4	130284088	130284451	NM_173487	132321	266767	C4orf33	chromosome 4 open reading frame 33	protein-coding	NO
chr4	146403801	146403951	chr4	146401950	146406025	NM_005900	4086	-81	SMAD1	SMAD family member 1	protein-coding	NO
chr4	153118455	153118605	chr4	153118393	153118620	NR_121627	100996286	96560	LINC02273	long intergenic non-protein coding RNA 2273	ncRNA	NO
chr4	178273018	178273168	chr4	178272898	178273376	NM_018248	55247	42065	NEIL3	nei like DNA glycosylase 3	protein-coding	NO
chr4	183505304	183505454	chr4	183505191	183505547	NM_001921	1635	333027	DCTD	dCMP deaminase	protein-coding	NO
chr4	183717021	183717171	chr4	183717100	183717635	NM_001921	1635	121310	DCTD	dCMP deaminase	protein-coding	NO
chr5	13957037	13957187	chr5	13957142	13957257	NM_001369	1767	-12523	DNAH5	dynein axonemal heavy chain 5	protein-coding	YES
chr5	13957234	13957384	chr5	13957142	13957257	NM_001369	1767	-12720	DNAH5	dynein axonemal heavy chain 5	protein-coding	YES
chr5	92413967	92414117	chr5	92413618	92413987	NR_015369	441094	493007	NR2F1-AS1	NR2F1 antisense RNA 1	ncRNA	NO
chr5	102633965	102634115	chr5	102634000	102634317	NM_033211	90355	38915	C5orf30	chromosome 5 open reading frame 30	protein-coding	NO
chr5	124726027	124726177	chr5	124725950	124726350	NR_109887	101927460	-102852	LINC02240	long intergenic non-protein coding RNA 2240	ncRNA	NO
chr5	125312443	125312593	chr5	125312218	125312658	NR_105042	102546228	-202752	LINC02039	long intergenic non-protein coding RNA 2039	ncRNA	NO
chr5	142547979	142548129	chr5	142547844	142548094	NR_046816	100874372	-24011	ARHGAP26-IT1	ARHGAP26 intronic transcript 1	ncRNA	NO
chr5	158635262	158635412	chr5	158635020	158635355	NM_144726	153830	-256	RNF145	ring finger protein 145	protein-coding	NO
chr6	1554855	1555005	chr6	1554959	1555029	NR_125804	101927703	-50836	FOXCUT	FOXC1 upstream transcript	ncRNA	NO
chr6	5167925	5168075	chr6	5167780	5168070	NR_037462	100500900	-19444	MIR3691	microRNA 3691	ncRNA	NO
chr6	11607759	11607909	chr6	11607620	11608050	NM_001100829	100113407	69852	TMEM170B	transmembrane protein 170B	protein-coding	NO
chr6	35564481	35564631	chr6	35564369	35564646	NR_049873	100847048	68010	MIR5690	microRNA 5690	ncRNA	NO
chr6	86818019	86818169	chr6	86818026	86818274	NR_003038	387066	-429643	SNHG5	small nucleolar RNA host gene 5	ncRNA	NO
chr6	99425344	99425494	chr6	99424935	99425930	NM_012160	26235	-29537	FBXL4	F-box and leucine rich repeat protein 4	protein-coding	NO
chr6	148455806	148455956	chr6	148455819	148456050	NM_015278	23328	-137583	SASH1	SAM and SH3 domain containing 1	protein-coding	YES
chr6	164985191	164985341	chr6	164984980	164985290	NR_131926	105378111	250286	MEAT6	melanoma-associated transcript 6	ncRNA	NO
chr7	7812163	7812313	chr7	7811996	7812540	NM_002947	6119	-54000	RPA3	replication protein A3	protein-coding	NO
chr7	8230081	8230231	chr7	8230081	8230271	NM_004968	3382	71526	ICA1	islet cell autoantigen 1	protein-coding	NO
chr7	31232703	31232853	chr7	31232560	31232875	NM_001118	117	140702	ADCYAP1R1	ADCYAP receptor type I	protein-coding	NO
chr7	92875217	92875367	chr7	92875117	92875340	NM_017667	55610	13613	VPS50	VPS50 subunit of EARP/GARPII complex	protein-coding	NO
chr8	13008003	13008153	chr8	13008025	13008319	NM_006094	10395	-17280	DLC1	DLC1 Rho GTPase activating protein	protein-coding	NO
chr8	15095738	15095888	chr8	15095428	15095812	NM_139167	137868	127	SGCZ	sarcoglycan zeta	protein-coding	NO
chr8	20676703	20676853	chr8	20676818	20677049	NR_130773	102467222	-134366	LOC102467222	uncharacterized LOC102467222	ncRNA	NO
chr8	20834823	20834973	chr8	20834854	20834988	NR_033894	286114	3401	LINC02153	long intergenic non-protein coding RNA 2153	ncRNA	NO
chr8	92543368	92543518	chr8	92543487	92543632	NM_052832	115111	281896	SLC26A7	solute carrier family 26 member 7	protein-coding	NO
chr8	108216929	108217079	chr8	108216550	108216935	NM_001146	284	131739	ANGPT1	angiopoietin 1	protein-coding	NO
chr8	144561580	144561730	chr8	144561586	144562054	NR_145785	109623485	26763	SNORD149	small nucleolar RNA- C/D box 149	snoRNA	NO
chr9	80454729	80454879	chr9	80454869	80454997	NM_004297	9630	-191566	GNA14	G protein subunit alpha 14	protein-coding	NO
chr9	98811843	98811993	chr9	98811345	98812075	NR_033838	158435	-16203	LOC158435	uncharacterized LOC158435	ncRNA	NO
chr9	102495203	102495353	chr9	102495040	102495410	NR_109802	101928438	86893	LOC101928438	uncharacterized LOC101928438	ncRNA	NO
chr9	128907006	128907156	chr9	128906852	128907165	NR_121584	101929116	131113	LOC101929116	uncharacterized LOC101929116	ncRNA	NO
chr11	119851023	119851173	chr11	119851124	119851295	NM_012101	23650	148463	TRIM29	tripartite motif containing 29	protein-coding	NO
chr9	36759703	36759853	chr9	36759848	36760096	NR_039686	100616289	63818	MIR4475	microRNA 4475	ncRNA	NO

## Sheet: OLD-BIASED
chr	start	end	HAR.chr	HAR.start	HAR.end	Nearest.Refseq.Gene	Entrez.ID	Nearest.TSS	Gene.Symbol	Gene.Description	Gene.Type	Contacts?
chr13	104796561	104796711	chr13	104796524	104796780	NR_126374	104326190	719086	LINC01309	long intergenic non-protein coding RNA 1309	ncRNA	NO
chr17	66202367	66202517	chr17	66202280	66202382	NM_016627	51321	172	AMZ2	archaelysin family metallopeptidase 2	protein-coding	YES
chr2	215442517	215442667	chr2	215442400	215442850	NR_047698	100885780	67686	VWC2L-IT1	VWC2L intronic transcript 1	ncRNA	NO
chr3	86683634	86683784	chr3	86683570	86683906	NR_135563	101927494	152616	LINC02070	long intergenic non-protein coding RNA 2070	ncRNA	NO
chr4	105342209	105342359	chr4	105341940	105342490	NR_125926	101929468	-69838	CXXC4-AS1	CXXC4 antisense RNA 1	ncRNA	NO
chr5	88753808	88753958	chr5	88753780	88754150	NM_002397	4208	-553961	MEF2C	myocyte enhancer factor 2C	protein-coding	NO
chr5	151462891	151463041	chr5	151462960	151463170	NR_109876	101927115	124507	LINC01933	long intergenic non-protein coding RNA 1933	ncRNA	NO
chr6	99164313	99164463	chr6	99164207	99164627	NR_148381	105447646	115188	PNKY	long intergenic non-protein coding RNA PNKY	ncRNA	NO
chr7	11766129	11766279	chr7	11765813	11766293	NM_015204	221981	105620	THSD7A	thrombospondin type 1 domain containing 7A	protein-coding	NO
chr7	15392176	15392326	chr7	15391919	15392272	NM_001004320	392636	209389	AGMO	alkylglycerol monooxygenase	protein-coding	NO
chr8	14386791	14386941	chr8	14386849	14387014	NR_029875	494332	324153	MIR383	microRNA 383	ncRNA	NO
chr9	16708990	16709140	chr9	16707947	16709850	NR_151723	111216284	-17747	BNC2-AS1	BNC2 antisense RNA 1	ncRNA	NO
chr9	83168015	83168165	chr9	83167985	83168225	NR_121212	101927477	578152	LINC01507	long intergenic non-protein coding RNA 1507	ncRNA	NO
chr1	44832767	44832917	chr1	44832492	44832773	NM_024066	79033	-11891	ERI3	ERI1 exoribonuclease family member 3	protein-coding	NO
chr11	83421317	83421467	chr11	83420525	83422950	NM_001364	1740	-27924	DLG2	discs large MAGUK scaffold protein 2	protein-coding	NO
chr16	18025518	18025668	chr16	18025366	18025531	NM_001282507	101059938	400926	NPIPA7	nuclear pore complex interacting protein family member A7	protein-coding	NO
chr16	31693159	31693309	chr16	31693118	31693231	NM_024048	100132341	-18700	CLUHP3	clustered mitochondria homolog pseudogene 3	pseudo	NO
chr2	119069350	119069500	chr2	119066625	119069475	NR_144530	100506797	-125463	THORLNC	testis associated oncogenic lncRNA	ncRNA	NO
chr22	38549255	38549405	chr22	38549322	38549487	NM_003560	8398	28507	PLA2G6	phospholipase A2 group VI	protein-coding	NO
chr4	83049702	83049852	chr4	83049751	83050502	NM_002138	3184	245367	HNRNPD	heterogeneous nuclear ribonucleoprotein D	protein-coding	NO
chr5	76948765	76948915	chr5	76948901	76949050	NM_032109	23440	-14318	OTP	orthopedia homeobox	protein-coding	NO
chr5	125948815	125948965	chr5	125948717	125949409	NM_032177	51808	12251	PHAX	phosphorylated adaptor for RNA export	protein-coding	NO
chr9	80976447	80976597	chr9	80976369	80976502	NM_021154	29968	64481	PSAT1	phosphoserine aminotransferase 1	protein-coding	YES

## Sheet: FETAL-BIASED
chr	start	end	HAR.chr	HAR.start	HAR.end	Nearest.Refseq.Gene	Entrez.ID	Nearest.TSS	Gene.Symbol	Gene.Description	Gene.Type	Contacts?
chr1	10588911	10589061	chr1	10588930	10589267	NM_004565	5195	53979	PEX14	peroxisomal biogenesis factor 14	protein-coding	NO
chr1	10773173	10773323	chr1	10773091	10773533	NM_017766	54897	83455	CASZ1	castor zinc finger 1	protein-coding	NO
chr1	19688408	19688558	chr1	19688085	19688655	NM_017765	54896	49663	SLC66A1	solute carrier family 66 member 1	protein-coding	NO
chr1	20713407	20713557	chr1	20713360	20713539	NR_033887	339505	41805	LINC01141	long intergenic non-protein coding RNA 1141	ncRNA	NO
chr1	31267939	31268089	chr1	31267948	31268008	NR_146732	105378622	-29485	LINC01778	long intergenic non-protein coding RNA 1778	ncRNA	NO
chr1	44902243	44902393	chr1	44902152	44902427	NM_018150	55182	12645	RNF220	ring finger protein 220	protein-coding	NO
chr1	45097690	45097840	chr1	45097595	45097759	NR_145816	109623472	38963	SNORD145	small nucleolar RNA- C/D box 145	snoRNA	NO
chr1	61449351	61449501	chr1	61449385	61449489	NR_110617	100996570	-12978	NFIA-AS2	NFIA antisense RNA 2	ncRNA	NO
chr1	64254271	64254421	chr1	64254385	64254693	NM_005012	4919	14658	ROR1	receptor tyrosine kinase like orphan receptor 1	protein-coding	YES
chr1	64590749	64590899	chr1	64590698	64591196	NR_110665	101927034	-11350	ROR1-AS1	ROR1 antisense RNA 1	ncRNA	NO
chr1	71185070	71185220	chr1	71184680	71185270	NR_125938	101927244	13009	LINC01788	long intergenic non-protein coding RNA 1788	ncRNA	NO
chr1	79659203	79659353	chr1	79659180	79659440	NM_022159	64123	-186863	ADGRL4	adhesion G protein-coupled receptor L4	protein-coding	NO
chr1	82270183	82270333	chr1	82270209	82270343	NM_012302	23266	2120	ADGRL2	adhesion G protein-coupled receptor L2	protein-coding	NO
chr1	87835389	87835539	chr1	87835463	87835856	NR_038324	100505768	1874	LINC01364	long intergenic non-protein coding RNA 1364	ncRNA	NO
chr1	97463471	97463621	chr1	97463380	97463624	NR_046590	100873932	-97933	DPYD-AS1	DPYD antisense RNA 1	ncRNA	NO
chr1	101620807	101620957	chr1	101620918	101621057	NR_104626	101928370	81202	LOC101928370	uncharacterized LOC101928370	ncRNA	NO
chr1	116854488	116854638	chr1	116854360	116854940	NM_000701	476	-61303	ATP1A1	ATPase Na+/K+ transporting subunit alpha 1	protein-coding	NO
chr1	119260654	119260804	chr1	119260771	119260851	NM_152380	6913	270237	TBX15	T-box transcription factor 15	protein-coding	NO
chr1	144520985	144521135	chr1	144520764	144521012	NR_104073	101954264	-29455	RNVU1-4	RNA- variant U1 small nuclear 4	snRNA	NO
chr1	175173334	175173484	chr1	175173420	175173770	NM_014656	9674	-11286	KIAA0040	KIAA0040	protein-coding	NO
chr1	175173556	175173706	chr1	175173420	175173770	NM_014656	9674	-11508	KIAA0040	KIAA0040	protein-coding	NO
chr1	202251771	202251921	chr1	202251720	202251990	NM_014176	29089	59218	UBE2T	ubiquitin conjugating enzyme E2 T	protein-coding	NO
chr1	203336321	203336471	chr1	203336280	203336530	NM_002023	2331	-16146	FMOD	fibromodulin	protein-coding	NO
chr1	204900523	204900673	chr1	204900579	204900750	NM_015090	23114	-12756	NFASC	neurofascin	protein-coding	YES
chr1	209630866	209631016	chr1	209630840	209631070	NR_029622	406988	25463	MIR205	microRNA 205	ncRNA	NO
chr1	210435904	210436054	chr1	210436018	210436248	NR_024337	574036	-28749	SERTAD4-AS1	SERTAD4 antisense RNA 1	ncRNA	NO
chr1	213759401	213759551	chr1	213759461	213759974	NR_046189	100861504	-338616	LINC00538	long intergenic non-protein coding RNA 538	ncRNA	NO
chr1	214202438	214202588	chr1	214202295	214202547	NM_002763	5629	40637	PROX1	prospero homeobox 1	protein-coding	YES
chr1	216357224	216357374	chr1	216356754	216357348	NR_125992	102723833	111492	LOC102723833	uncharacterized LOC102723833	ncRNA	NO
chr1	218030478	218030628	chr1	218030542	218030819	NR_048550	100885798	-35689	LINC00210	long intergenic non-protein coding RNA 210	ncRNA	NO
chr1	223060044	223060194	chr1	223059740	223060440	NM_032890	84976	-41647	DISP1	dispatched RND transporter family member 1	protein-coding	NO
chr1	237207707	237207857	chr1	237207560	237207935	NM_001035	6262	2298	RYR2	ryanodine receptor 2	protein-coding	NO
chr1	245389005	245389155	chr1	245389034	245389269	NR_151721	111216275	8739	KIF26B-AS1	KIF26B antisense RNA 1	ncRNA	NO
chr1	245851369	245851519	chr1	245851420	245851950	NR_151721	111216275	-453625	KIF26B-AS1	KIF26B antisense RNA 1	ncRNA	NO
chr1	246231088	246231238	chr1	246230840	246231550	NM_022743	64754	349551	SMYD3	SET and MYND domain containing 3	protein-coding	NO
chr10	2117643	2117793	chr10	2117487	2117687	NR_106720	102465944	565	MIR6072	microRNA 6072	ncRNA	NO
chr10	3324408	3324558	chr10	3324160	3324450	NR_131187	105376360	-36404	LOC105376360	uncharacterized LOC105376360	ncRNA	NO
chr10	4320468	4320618	chr10	4320380	4320750	NR_108040	100652988	-34439	LINC00702	long intergenic non-protein coding RNA 702	ncRNA	NO
chr10	8546401	8546551	chr10	8546534	8547054	NR_134492	105376398	89878	LOC105376398	uncharacterized LOC105376398	ncRNA	NO
chr10	8546635	8546785	chr10	8546534	8547054	NR_134492	105376398	89644	LOC105376398	uncharacterized LOC105376398	ncRNA	NO
chr10	10474465	10474615	chr10	10474238	10474501	NR_120637	101928322	29772	CELF2-DT	CELF2 divergent transript	ncRNA	NO
chr10	14233497	14233647	chr10	14233546	14233781	NR_120638	101928453	117289	LOC101928453	uncharacterized LOC101928453	ncRNA	NO
chr10	16500419	16500569	chr10	16500290	16500553	NM_030664	9317	21552	PTER	phosphotriesterase related	protein-coding	YES
chr10	28552441	28552591	chr10	28552440	28552755	NM_173496	143098	18536	MPP7	membrane palmitoylated protein 7	protein-coding	NO
chr10	48558065	48558215	chr10	48557700	48558350	NM_004962	2662	-118975	GDF10	growth differentiation factor 10	protein-coding	NO
chr10	63097893	63098043	chr10	63097900	63098298	NR_120643	101928781	-114429	TMEM26-AS1	TMEM26 antisense RNA 1	ncRNA	NO
chr10	77483346	77483496	chr10	77483346	77484229	NR_132791	105378367	11208	LOC105378367	uncharacterized LOC105378367	ncRNA	NO
chr10	108787167	108787317	chr10	108787280	108787430	NM_052918	114815	137222	SORCS1	sortilin related VPS10 domain containing receptor 1	protein-coding	YES
chr10	122945719	122945869	chr10	122945673	122946002	NM_018117	55717	334920	WDR11	WD repeat domain 11	protein-coding	NO
chr10	122948237	122948387	chr10	122948084	122948306	NM_018117	55717	337438	WDR11	WD repeat domain 11	protein-coding	NO
chr10	123268553	123268703	chr10	123268680	123268930	NM_000141	2263	22200	FGFR2	fibroblast growth factor receptor 2	protein-coding	NO
chr10	123914140	123914290	chr10	123914220	123914600	NM_006997	10579	-8930	TACC2	transforming acidic coiled-coil containing protein 2	protein-coding	NO
chr10	127180259	127180409	chr10	127180076	127180414	NR_023362	100169752	-82606	TEX36-AS1	TEX36 antisense RNA 1	ncRNA	NO
chr10	128956135	128956285	chr10	128956040	128956455	NM_001039762	642938	38645	INSYN2A	inhibitory synaptic factor 2A	protein-coding	NO
chr10	130844333	130844483	chr10	130844170	130844412	NR_148990	728327	133311	LINC02667	long intergenic non-protein coding RNA 2667	ncRNA	NO
chr10	131754671	131754821	chr10	131754168	131754688	NM_001005463	253738	7792	EBF3	EBF transcription factor 3	protein-coding	NO
chr11	7435819	7435969	chr11	7435936	7436272	NR_103855	100506258	51172	LOC100506258	uncharacterized LOC100506258	ncRNA	NO
chr11	8378831	8378981	chr11	8378650	8378866	NM_002315	4004	-88572	LMO1	LIM domain only 1	protein-coding	NO
chr11	8384189	8384339	chr11	8383717	8384194	NM_002315	4004	-93930	LMO1	LIM domain only 1	protein-coding	NO
chr11	10625867	10626017	chr11	10625947	10626132	NM_006691	10894	-35730	LYVE1	lymphatic vessel endothelial hyaluronan receptor 1	protein-coding	NO
chr11	11232031	11232181	chr11	11231886	11232144	NM_001256686	283106	142691	CSNK2A3	casein kinase 2 alpha 3	protein-coding	NO
chr11	22513391	22513541	chr11	22513317	22513656	NR_120583	102723378	99	LINC01495	long intergenic non-protein coding RNA 1495	ncRNA	NO
chr11	31268391	31268541	chr11	31268253	31268629	NM_020869	341019	122820	DCDC1	doublecortin domain containing 1	protein-coding	NO
chr11	42618427	42618577	chr11	42618379	42618711	NR_038309	100507205	-343262	LINC02740	long intergenic non-protein coding RNA 2740	ncRNA	NO
chr11	79015957	79016107	chr11	79016077	79016313	NR_030598	100126333	97121	MIR708	microRNA 708	ncRNA	NO
chr11	79338313	79338463	chr11	79338429	79338665	NM_001098816	26011	-186314	TENM4	teneurin transmembrane protein 4	protein-coding	NO
chr11	86299773	86299923	chr11	86299520	86299880	NM_006680	10873	83392	ME3	malic enzyme 3	protein-coding	NO
chr11	87015577	87015727	chr11	87015480	87015850	NM_022918	65084	266676	TMEM135	transmembrane protein 135	protein-coding	NO
chr11	95015553	95015703	chr11	95015617	95015966	NM_144665	143686	-49989	SESN3	sestrin 3	protein-coding	NO
chr11	110951981	110952131	chr11	110951765	110952083	NR_149131	105369490	15986	LINC02550	long intergenic non-protein coding RNA 2550	ncRNA	NO
chr11	112944391	112944541	chr11	112944247	112944430	NR_120563	101928847	-110284	LOC101928847	uncharacterized LOC101928847	ncRNA	NO
chr11	113986176	113986326	chr11	113985980	113986695	NM_006006	7704	52318	ZBTB16	zinc finger and BTB domain containing 16	protein-coding	YES
chr11	113986327	113986477	chr11	113985980	113986695	NM_006006	7704	52469	ZBTB16	zinc finger and BTB domain containing 16	protein-coding	YES
chr11	113986503	113986653	chr11	113985980	113986695	NM_006006	7704	52645	ZBTB16	zinc finger and BTB domain containing 16	protein-coding	YES
chr11	114099724	114099874	chr11	114099701	114100229	NM_006169	4837	-66736	NNMT	nicotinamide N-methyltransferase	protein-coding	NO
chr11	115155684	115155834	chr11	115155689	115155898	NR_135108	105369509	-48537	LOC105369509	uncharacterized LOC105369509	ncRNA	NO
chr11	115924339	115924489	chr11	115924312	115924542	NR_034148	283143	-293496	LINC00900	long intergenic non-protein coding RNA 900	ncRNA	NO
chr11	116044954	116045104	chr11	116045070	116045256	NR_034148	283143	-414111	LINC00900	long intergenic non-protein coding RNA 900	ncRNA	NO
chr11	116045110	116045260	chr11	116045070	116045256	NR_034148	283143	-414267	LINC00900	long intergenic non-protein coding RNA 900	ncRNA	NO
chr11	124527681	124527831	chr11	124527693	124527929	NM_018978	54414	15879	SIAE	sialic acid acetylesterase	protein-coding	NO
chr11	125063105	125063255	chr11	125063060	125063290	NM_022062	63876	28533	PKNOX2	PBX/knotted 1 homeobox 2	protein-coding	YES
chr11	128346741	128346891	chr11	128346624	128346977	NM_005238	2113	45389	ETS1	ETS proto-oncogene 1- transcription factor	protein-coding	NO
chr11	131948466	131948616	chr11	131948475	131948847	NM_016522	50863	167829	NTM	neurotrimin	protein-coding	NO
chr12	1157371	1157521	chr12	1157465	1157770	NM_178039	23085	20532	ERC1	ELKS/RAB6-interacting/CAST family member 1	protein-coding	YES
chr12	12473079	12473229	chr12	12472949	12473205	NM_018050	54682	30022	MANSC1	MANSC domain containing 1	protein-coding	NO
chr12	12735972	12736122	chr12	12735910	12736239	NM_030640	80824	-20250	DUSP16	dual specificity phosphatase 16	protein-coding	NO
chr12	13939901	13940051	chr12	13939816	13939908	NM_000834	2904	193314	GRIN2B	glutamate ionotropic receptor NMDA type subunit 2B	protein-coding	YES
chr12	17290463	17290613	chr12	17290464	17290740	NR_036619	728622	148857	SKP1P2	S-phase kinase associated protein 1 pseudogene 2	pseudo	NO
chr12	41981657	41981807	chr12	41981597	41981748	NM_013377	29951	150191	PDZRN4	PDZ domain containing ring finger 4	protein-coding	NO
chr12	43150812	43150962	chr12	43150800	43151235	NR_135028	105369739	64869	LINC02450	long intergenic non-protein coding RNA 2450	ncRNA	NO
chr12	43151118	43151268	chr12	43150800	43151235	NR_135028	105369739	65175	LINC02450	long intergenic non-protein coding RNA 2450	ncRNA	NO
chr12	60916500	60916650	chr12	60916499	60916754	NM_004731	9194	833424	SLC16A7	solute carrier family 16 member 7	protein-coding	NO
chr12	72477123	72477273	chr12	72477181	72477574	NM_173353	121278	144573	TPH2	tryptophan hydroxylase 2	protein-coding	NO
chr12	72477352	72477502	chr12	72477181	72477574	NM_173353	121278	144802	TPH2	tryptophan hydroxylase 2	protein-coding	NO
chr12	89743707	89743857	chr12	89743565	89743941	NM_001946	1848	2496	DUSP6	dual specificity phosphatase 6	protein-coding	NO
chr12	94929027	94929177	chr12	94928969	94929082	NR_049885	100847031	-26463	MIR5700	microRNA 5700	ncRNA	NO
chr12	97931541	97931691	chr12	97931250	97931685	NR_029678	406926	-25974	MIR135A2	microRNA 135a-2	ncRNA	NO
chr12	108342397	108342547	chr12	108342254	108342429	NR_037629	728739	-44924	LOC728739	programmed cell death 2 pseudogene	pseudo	NO
chr12	110552535	110552685	chr12	110552150	110554900	NM_014055	28981	-9552	IFT81	intraflagellar transport 81	protein-coding	NO
chr12	114318907	114319057	chr12	114317750	114319450	NM_016196	9904	85148	RBM19	RNA binding motif protein 19	protein-coding	NO
chr12	114844965	114845115	chr12	114845100	114845780	NM_000192	6910	777	TBX5	T-box transcription factor 5	protein-coding	NO
chr12	119363674	119363824	chr12	119363800	119364010	NM_194286	84530	-55597	SRRM4	serine/arginine repetitive matrix 4	protein-coding	NO
chr13	40661545	40661695	chr13	40661399	40661633	NR_046870	100874127	-94326	LINC00332	long intergenic non-protein coding RNA 332	ncRNA	NO
chr13	44619267	44619417	chr13	44619366	44619586	NR_026955	121838	22871	LINC00284	long intergenic non-protein coding RNA 284	ncRNA	NO
chr13	44619433	44619583	chr13	44619366	44619586	NR_026955	121838	23037	LINC00284	long intergenic non-protein coding RNA 284	ncRNA	NO
chr13	53500205	53500355	chr13	53499998	53500334	NM_002590	5100	-77505	PCDH8	protocadherin 8	protein-coding	NO
chr13	53718519	53718669	chr13	53718154	53718798	NR_125788	102723875	7441	LINC01065	long intergenic non-protein coding RNA 1065	ncRNA	NO
chr13	75540951	75541101	chr13	75540774	75541131	NR_027466	647288	273491	CTAGE11P	CTAGE family member 11- pseudogene	pseudo	NO
chr13	77063477	77063627	chr13	77063243	77063740	NM_138444	115207	396988	KCTD12	potassium channel tetramerization domain containing 12	protein-coding	NO
chr13	88759845	88759995	chr13	88759783	88759986	NR_131919	105370306	-35202	LINC00373	long intergenic non-protein coding RNA 373	ncRNA	NO
chr13	91137758	91137908	chr13	91137512	91138025	NR_120414	101927224	-7709	LINC01049	long intergenic non-protein coding RNA 1049	ncRNA	NO
chr13	92972893	92973043	chr13	92972675	92972936	NR_120382	100873970	31492	GPC5-AS2	GPC5 antisense RNA 2	ncRNA	NO
chr13	95600283	95600433	chr13	95600140	95600795	NR_047487	100861544	-11937	LINC00557	long intergenic non-protein coding RNA 557	ncRNA	NO
chr13	97422205	97422355	chr13	97422090	97422436	NR_051966	100887754	214146	LINC00359	long intergenic non-protein coding RNA 359	ncRNA	NO
chr13	104796561	104796711	chr13	104796524	104796780	NR_126374	104326190	719086	LINC01309	long intergenic non-protein coding RNA 1309	ncRNA	NO
chr13	107001776	107001926	chr13	107001720	107002090	NR_034119	728192	-27061	LINC00460	long intergenic non-protein coding RNA 460	ncRNA	NO
chr13	107002083	107002233	chr13	107001720	107002090	NR_034119	728192	-26754	LINC00460	long intergenic non-protein coding RNA 460	ncRNA	NO
chr13	110900707	110900857	chr13	110900260	110900755	NM_001845	1282	58722	COL4A1	collagen type IV alpha 1 chain	protein-coding	YES
chr14	24476161	24476311	chr14	24476271	24476413	NM_001082488	728635	-57	DHRS4L1	dehydrogenase/reductase 4 like 1	protein-coding	NO
chr14	28309653	28309803	chr14	28309461	28310017	NR_148991	728755	-167301	LOC728755	uncharacterized LOC728755	ncRNA	NO
chr14	32346677	32346827	chr14	32346360	32346890	NR_146544	105370439	-67307	LINC02313	long intergenic non-protein coding RNA 2313	ncRNA	NO
chr14	33197183	33197333	chr14	33197172	33197384	NM_022123	64067	-210827	NPAS3	neuronal PAS domain protein 3	protein-coding	YES
chr14	33496337	33496487	chr14	33496200	33497125	NM_022123	64067	88327	NPAS3	neuronal PAS domain protein 3	protein-coding	YES
chr14	33819123	33819273	chr14	33819145	33819460	NR_132771	106635522	-358945	SNORA89	small nucleolar RNA- H/ACA box 89	snoRNA	NO
chr14	34169493	34169643	chr14	34169525	34169955	NR_132771	106635522	-8575	SNORA89	small nucleolar RNA- H/ACA box 89	snoRNA	NO
chr14	36677680	36677830	chr14	36677779	36678420	NR_049735	100886964	-31898	PTCSC3	papillary thyroid carcinoma susceptibility candidate 3	ncRNA	NO
chr14	39207237	39207387	chr14	39207332	39207595	NR_135256	105370457	-144487	LOC105370457	uncharacterized LOC105370457	ncRNA	NO
chr14	40133336	40133486	chr14	40133125	40133715	NM_203301	254170	-231707	FBXO33	F-box protein 33	protein-coding	NO
chr14	46268667	46268817	chr14	46268792	46269006	NR_146546	105370479	-83937	LINC02303	long intergenic non-protein coding RNA 2303	ncRNA	NO
chr14	48843263	48843413	chr14	48843159	48843565	NR_039996	100506433	-579121	LINC00648	long intergenic non-protein coding RNA 648	ncRNA	NO
chr14	64705549	64705699	chr14	64705360	64705795	NM_015180	23224	22952	SYNE2	spectrin repeat containing nuclear envelope protein 2	protein-coding	YES
chr14	68622809	68622959	chr14	68622887	68623012	NM_002877	5890	332575	RAD51B	RAD51 paralog B	protein-coding	NO
chr14	69172657	69172807	chr14	69172700	69173160	NR_135816	100996664	-77228	LOC100996664	uncharacterized LOC100996664	ncRNA	NO
chr14	70102889	70103039	chr14	70102660	70103430	NM_014734	9766	24651	SUSD6	sushi domain containing 6	protein-coding	NO
chr14	70103125	70103275	chr14	70102660	70103430	NM_014734	9766	24887	SUSD6	sushi domain containing 6	protein-coding	NO
chr14	76289165	76289315	chr14	76288936	76289401	NM_003239	7043	159098	TGFB3	transforming growth factor beta 3	protein-coding	NO
chr14	82129017	82129167	chr14	82128607	82129254	NR_110074	101928559	-39687	LINC01467	long intergenic non-protein coding RNA 1467	ncRNA	NO
chr14	82147896	82148046	chr14	82147741	82148057	NR_110074	101928559	-58566	LINC01467	long intergenic non-protein coding RNA 1467	ncRNA	NO
chr14	82158457	82158607	chr14	82158268	82158653	NR_146498	102724294	50950	LINC02311	long intergenic non-protein coding RNA 2311	ncRNA	NO
chr14	83595633	83595783	chr14	83595470	83595703	NR_146650	101928599	486732	LINC02301	long intergenic non-protein coding RNA 2301	ncRNA	NO
chr14	85124262	85124412	chr14	85124220	85124670	NR_145983	26843	-613939	SNORD3P3	small nucleolar RNA- C/D box 3 pseudogene 3	snoRNA	NO
chr14	98099719	98099869	chr14	98099540	98099730	NR_033943	100129345	53201	LINC02291	long intergenic non-protein coding RNA 2291	ncRNA	NO
chr14	99502377	99502527	chr14	99502300	99502660	NM_022898	64919	236082	BCL11B	BAF chromatin remodeling complex subunit BCL11B	protein-coding	NO
chr14	99692960	99693110	chr14	99692869	99693036	NM_022898	64919	45499	BCL11B	BAF chromatin remodeling complex subunit BCL11B	protein-coding	NO
chr15	34030291	34030441	chr15	34030260	34030735	NM_012125	1133	-230332	CHRM5	cholinergic receptor muscarinic 5	protein-coding	YES
chr15	35814209	35814359	chr15	35813893	35814650	NM_080650	89978	24082	DPH6	diphthamine biosynthesis 6	protein-coding	YES
chr15	36263451	36263601	chr15	36263177	36263630	NR_039735	100616293	44469	MIR4510	microRNA 4510	ncRNA	NO
chr15	36594535	36594685	chr15	36594472	36594817	NM_032499	84529	-277217	C15orf41	chromosome 15 open reading frame 41	protein-coding	NO
chr15	37190837	37190987	chr15	37190729	37191210	NM_001101327	145845	-12178	LOC145845	uncharacterized LOC145845	ncRNA	NO
chr15	38064050	38064200	chr15	38063708	38064091	NM_152453	145942	-162683	TMCO5A	transmembrane and coiled-coil domains 5A	protein-coding	NO
chr15	38105915	38106065	chr15	38105615	38106088	NM_152453	145942	-120818	TMCO5A	transmembrane and coiled-coil domains 5A	protein-coding	NO
chr15	60591800	60591950	chr15	60591436	60591855	NM_004039	302	98310	ANXA2	annexin A2	protein-coding	NO
chr15	61591359	61591509	chr15	61591340	61591590	NM_002943	6095	-69933	RORA	RAR related orphan receptor A	protein-coding	NO
chr15	69436145	69436295	chr15	69436128	69436343	NM_015554	26035	-16716	GLCE	glucuronic acid epimerase	protein-coding	YES
chr15	70546729	70546879	chr15	70546710	70547014	NM_005078	7090	-156548	TLE3	TLE family member 3- transcriptional corepressor	protein-coding	NO
chr15	71889516	71889666	chr15	71889266	71889527	NM_024817	79875	50016	THSD4	thrombospondin type 1 domain containing 4	protein-coding	NO
chr15	77849425	77849575	chr15	77849020	77849790	NR_135692	101929457	31563	LOC101929457	uncharacterized LOC101929457	ncRNA	NO
chr15	77849739	77849889	chr15	77849020	77849790	NR_135692	101929457	31877	LOC101929457	uncharacterized LOC101929457	ncRNA	NO
chr15	78964317	78964467	chr15	78964053	78964383	NM_000750	1143	-30840	CHRNB4	cholinergic receptor nicotinic beta 4 subunit	protein-coding	YES
chr15	86925645	86925795	chr15	86925692	86925850	NR_046012	727915	-65521	AGBL1-AS1	AGBL1 antisense RNA 1	ncRNA	NO
chr15	87031385	87031535	chr15	87031311	87031507	NR_046012	727915	-171261	AGBL1-AS1	AGBL1 antisense RNA 1	ncRNA	NO
chr15	90944047	90944197	chr15	90943200	90947150	NM_003870	8826	12648	IQGAP1	IQ motif containing GTPase activating protein 1	protein-coding	NO
chr15	90944584	90944734	chr15	90943200	90947150	NM_003870	8826	13185	IQGAP1	IQ motif containing GTPase activating protein 1	protein-coding	NO
chr15	90945605	90945755	chr15	90943200	90947150	NM_003870	8826	14206	IQGAP1	IQ motif containing GTPase activating protein 1	protein-coding	NO
chr15	96389291	96389441	chr15	96389100	96389790	NR_158193	105369212	281704	LOC105369212	uncharacterized LOC105369212	ncRNA	NO
chr15	96590829	96590979	chr15	96590906	96591010	NR_158193	105369212	80166	LOC105369212	uncharacterized LOC105369212	ncRNA	NO
chr15	96952371	96952521	chr15	96952460	96953100	NM_021005	7026	75452	NR2F2	nuclear receptor subfamily 2 group F member 2	protein-coding	NO
chr15	98196006	98196156	chr15	98196119	98196246	NR_110756	101927310	-92153	LOC101927310	uncharacterized LOC101927310	ncRNA	NO
chr15	98255983	98256133	chr15	98255868	98256060	NR_110756	101927310	-152130	LOC101927310	uncharacterized LOC101927310	ncRNA	NO
chr15	98382163	98382313	chr15	98382213	98382281	NR_024172	91948	35421	LINC00923	long intergenic non-protein coding RNA 923	ncRNA	NO
chr16	8030159	8030309	chr16	8030037	8030429	NM_001146336	283953	557594	TMEM114	transmembrane protein 114	protein-coding	NO
chr16	17944717	17944867	chr16	17944578	17944875	NM_022166	64131	-379975	XYLT1	xylosyltransferase 1	protein-coding	NO
chr16	27811330	27811480	chr16	27811380	27811550	NR_147898	100128079	-81055	LOC100128079	uncharacterized LOC100128079	ncRNA	NO
chr16	54518521	54518671	chr16	54518416	54518596	NR_134922	100996345	-113985	LINC02140	long intergenic non-protein coding RNA 2140	ncRNA	NO
chr16	59178397	59178547	chr16	59178444	59178638	NM_002080	2806	-410252	GOT2	glutamic-oxaloacetic transaminase 2	protein-coding	NO
chr16	61603047	61603197	chr16	61602751	61603231	NM_001796	1006	467220	CDH8	cadherin 8	protein-coding	NO
chr16	62943161	62943311	chr16	62943298	62943793	NM_001796	1006	-872894	CDH8	cadherin 8	protein-coding	NO
chr16	63850329	63850479	chr16	63850349	63850448	NM_001797	1009	1305562	CDH11	cadherin 11	protein-coding	NO
chr16	68989100	68989250	chr16	68988894	68989216	NM_024562	79613	111741	TANGO6	transport and golgi organization 6 homolog	protein-coding	NO
chr16	73087554	73087704	chr16	73086940	73087560	NM_006885	463	5291	ZFHX3	zinc finger homeobox 3	protein-coding	NO
chr16	73129679	73129829	chr16	73129256	73129722	NM_001101347	283902	3506	HCCAT5	hepatocellular carcinoma associated transcript 5	ncRNA	NO
chr16	77613553	77613703	chr16	77613220	77613560	NM_001105663	283927	-142761	NUDT7	nudix hydrolase 7	protein-coding	NO
chr16	78218341	78218491	chr16	78218430	78218683	NM_016373	51741	84865	WWOX	WW domain containing oxidoreductase	protein-coding	YES
chr16	78471196	78471346	chr16	78471280	78471570	NM_016373	51741	337720	WWOX	WW domain containing oxidoreductase	protein-coding	YES
chr16	80156009	80156159	chr16	80155484	80156013	NR_104660	101928248	326938	LINC01229	long intergenic non-protein coding RNA 1229	ncRNA	NO
chr16	82661451	82661601	chr16	82661420	82661700	NM_001257	1012	952	CDH13	cadherin 13	protein-coding	NO
chr17	597483	597633	chr17	597337	597546	NM_018289	55275	20521	VPS53	VPS53 subunit of GARP complex	protein-coding	YES
chr17	2141663	2141813	chr17	2141663	2142105	NM_017575	23293	-1597	SMG6	SMG6 nonsense mediated mRNA decay factor	protein-coding	NO
chr17	6063662	6063812	chr17	6063620	6063810	NM_015253	23302	89803	WSCD1	WSC domain containing 1	protein-coding	YES
chr17	9350060	9350210	chr17	9350158	9350561	NM_004853	9482	129002	STX8	syntaxin 8	protein-coding	NO
chr17	9877495	9877645	chr17	9877400	9877710	NM_003644	8522	-14758	GAS7	growth arrest specific 7	protein-coding	YES
chr17	31643975	31644125	chr17	31643628	31644030	NM_001094	40	-24044	ASIC2	acid sensing ion channel subunit 2	protein-coding	NO
chr17	40620152	40620302	chr17	40620289	40620465	NM_005177	535	9331	ATP6V0A1	ATPase H+ transporting V0 subunit a1	protein-coding	NO
chr17	42215407	42215557	chr17	42215400	42215995	NM_024032	78995	-3816	C17orf53	chromosome 17 open reading frame 53	protein-coding	NO
chr17	42215618	42215768	chr17	42215400	42215995	NM_024032	78995	-3605	C17orf53	chromosome 17 open reading frame 53	protein-coding	NO
chr17	47555195	47555345	chr17	47554963	47555420	NR_110805	101927207	-16159	LINC02075	long intergenic non-protein coding RNA 2075	ncRNA	NO
chr17	55675453	55675603	chr17	55675585	55675881	NR_110807	101927539	10245	LOC101927539	uncharacterized LOC101927539	ncRNA	NO
chr17	59337947	59338097	chr17	59337678	59338126	NR_136397	101927855	107043	LOC101927855	uncharacterized LOC101927855	ncRNA	NO
chr17	63435167	63435317	chr17	63435100	63435484	NR_131984	105827617	-18417	LINC02563	long intergenic non-protein coding RNA 2563	ncRNA	NO
chr17	66202367	66202517	chr17	66202280	66202382	NM_016627	51321	172	AMZ2	archaelysin family metallopeptidase 2	protein-coding	YES
chr17	71800311	71800461	chr17	71800180	71800755	NR_040020	400620	17425	LINC02092	long intergenic non-protein coding RNA 2092	ncRNA	NO
chr17	75038891	75039041	chr17	75038894	75039140	NR_027058	654434	-45759	SNHG20	small nucleolar RNA host gene 20	ncRNA	NO
chr17	77924992	77925142	chr17	77924863	77925031	NM_019020	125058	-415	TBC1D16	TBC1 domain family member 16	protein-coding	NO
chr18	3499365	3499515	chr18	3499005	3499550	NR_110428	100505592	33192	GAPLINC	gastric adenocarcinoma associated- positive CD44 regulator- long intergenic non-coding RNA	ncRNA	NO
chr18	22622821	22622971	chr18	22622580	22623065	NR_146903	105372030	-54953	LINC01894	long intergenic non-protein coding RNA 1894	ncRNA	NO
chr18	22714724	22714874	chr18	22714860	22715210	NR_146903	105372030	-146856	LINC01894	long intergenic non-protein coding RNA 1894	ncRNA	NO
chr18	23916036	23916186	chr18	23915443	23916424	NR_110762	100506787	-86848	LINC01543	long intergenic non-protein coding RNA 1543	ncRNA	NO
chr18	34049739	34049889	chr18	34049662	34050048	NM_025135	80206	172138	FHOD3	formin homology 2 domain containing 3	protein-coding	NO
chr18	35249252	35249402	chr18	35249100	35249370	NR_036202	100422857	12229	MIR4318	microRNA 4318	ncRNA	NO
chr18	37261191	37261341	chr18	37261081	37261208	NR_049848	100846997	-4525	MIR5583-2	microRNA 5583-2	ncRNA	NO
chr18	41605462	41605612	chr18	41605311	41605582	NR_110792	101927921	506125	LINC01478	long intergenic non-protein coding RNA 1478	ncRNA	NO
chr18	42872009	42872159	chr18	42871845	42872636	NM_007163	8170	79124	SLC14A2	solute carrier family 14 member 2	protein-coding	NO
chr18	44069008	44069158	chr18	44068825	44069010	NM_144612	125336	29966	LOXHD1	lipoxygenase homology domains 1	protein-coding	YES
chr18	56579349	56579499	chr18	56578960	56579470	NM_018181	55205	47315	ZNF532	zinc finger protein 532	protein-coding	YES
chr18	76190352	76190502	chr18	76190067	76190551	NR_104127	101927715	-484744	LINC01029	long intergenic non-protein coding RNA 1029	ncRNA	NO
chr19	34857845	34857995	chr19	34857520	34858080	NM_000175	2821	1819	GPI	glucose-6-phosphate isomerase	protein-coding	NO
chr19	38554155	38554305	chr19	38554096	38554292	NR_145800	109623473	-99506	SNORD152	small nucleolar RNA- C/D box 152	snoRNA	NO
chr2	6485658	6485808	chr2	6485395	6485718	NR_110251	101929390	29821	LINC01247	long intergenic non-protein coding RNA 1247	ncRNA	NO
chr2	6704658	6704808	chr2	6704433	6704810	NR_110498	102800315	69186	LINC01246	long intergenic non-protein coding RNA 1246	ncRNA	NO
chr2	8549673	8549823	chr2	8549680	8550270	NR_034135	339789	-81199	LINC00299	long intergenic non-protein coding RNA 299	ncRNA	NO
chr2	8550266	8550416	chr2	8549680	8550270	NR_034135	339789	-81792	LINC00299	long intergenic non-protein coding RNA 299	ncRNA	NO
chr2	19661791	19661941	chr2	19661653	19661796	NM_145260	130497	-103482	OSR1	odd-skipped related transcription factor 1	protein-coding	NO
chr2	21676859	21677009	chr2	21676287	21676953	NR_038837	645949	256590	LINC01822	long intergenic non-protein coding RNA 1822	ncRNA	NO
chr2	21742267	21742417	chr2	21742295	21742522	NR_038837	645949	191182	LINC01822	long intergenic non-protein coding RNA 1822	ncRNA	NO
chr2	21980768	21980918	chr2	21980620	21981350	NR_038837	645949	-47319	LINC01822	long intergenic non-protein coding RNA 1822	ncRNA	NO
chr2	22552146	22552296	chr2	22551960	22552710	NR_110577	102723362	-207130	LINC01884	long intergenic non-protein coding RNA 1884	ncRNA	NO
chr2	31298460	31298610	chr2	31298452	31298513	NM_024572	79623	53971	GALNT14	polypeptide N-acetylgalactosaminyltransferase 14	protein-coding	NO
chr2	34792311	34792461	chr2	34792309	34792506	NR_126404	104355288	-110238	LINC01320	long intergenic non-protein coding RNA 1320	ncRNA	NO
chr2	36567008	36567158	chr2	36566967	36567298	NR_037631	100288911	15630	CRIM1-DT	CRIM1 divergent transcript	ncRNA	NO
chr2	49444141	49444291	chr2	49444182	49444358	NM_000145	2492	-62550	FSHR	follicle stimulating hormone receptor	protein-coding	NO
chr2	58282267	58282417	chr2	58282128	58282836	NM_006296	7444	8495	VRK2	VRK serine/threonine kinase 2	protein-coding	YES
chr2	60280998	60281148	chr2	60280860	60281290	NR_132991	106660609	329098	MIR4432HG	MIR4432 host gene	ncRNA	NO
chr2	76508211	76508361	chr2	76508173	76508319	NM_003203	6936	-570245	GCFC2	GC-rich sequence DNA-binding factor 2	protein-coding	NO
chr2	80865863	80866013	chr2	80865761	80866001	NM_004389	1496	325434	CTNNA2	catenin alpha 2	protein-coding	NO
chr2	105489080	105489230	chr2	105489020	105489380	NR_110373	102682016	-102	LINC01159	long intergenic non-protein coding RNA 1159	ncRNA	NO
chr2	105879240	105879390	chr2	105879181	105879521	NM_007227	11250	21115	GPR45	G protein-coupled receptor 45	protein-coding	YES
chr2	113992944	113993094	chr2	113992300	113994825	NR_015377	654433	-85	PAX8-AS1	PAX8 antisense RNA 1	ncRNA	NO
chr2	119067953	119068103	chr2	119066625	119069475	NR_144530	100506797	-124066	THORLNC	testis associated oncogenic lncRNA	ncRNA	NO
chr2	133346747	133346897	chr2	133346893	133347089	NM_144586	116372	80956	LYPD1	LY6/PLAUR domain containing 1	protein-coding	NO
chr2	145786103	145786253	chr2	145785838	145786411	NR_033870	401014	360644	TEX41	testis expressed 41	ncRNA	NO
chr2	147956170	147956320	chr2	147955812	147956576	NR_026904	728773	611620	PABPC1P2	poly(A) binding protein cytoplasmic 1 pseudogene 2	pseudo	NO
chr2	147956345	147956495	chr2	147955812	147956576	NR_026904	728773	611795	PABPC1P2	poly(A) binding protein cytoplasmic 1 pseudogene 2	pseudo	NO
chr2	151478211	151478361	chr2	151478040	151478710	NR_110244	101929282	-7125	LINC02612	long intergenic non-protein coding RNA 2612	ncRNA	NO
chr2	151478670	151478820	chr2	151478040	151478710	NR_110244	101929282	-6666	LINC02612	long intergenic non-protein coding RNA 2612	ncRNA	NO
chr2	164410317	164410467	chr2	164410054	164410373	NM_018086	55137	182126	FIGN	fidgetin- microtubule severing factor	protein-coding	NO
chr2	169630231	169630381	chr2	169630245	169630560	NR_045786	100861402	12633	CERS6-AS1	CERS6 antisense RNA 1	ncRNA	NO
chr2	169630511	169630661	chr2	169630245	169630560	NR_045786	100861402	12353	CERS6-AS1	CERS6 antisense RNA 1	ncRNA	NO
chr2	171679383	171679533	chr2	171679517	171679721	NM_000817	2571	6061	GAD1	glutamate decarboxylase 1	protein-coding	NO
chr2	176943525	176943675	chr2	176943110	176943744	NM_001080458	344191	5090	EVX2	even-skipped homeobox 2	protein-coding	NO
chr2	201038083	201038233	chr2	201038051	201038500	NM_015535	26010	-132444	SPATS2L	spermatogenesis associated serine rich 2 like	protein-coding	YES
chr2	202988025	202988175	chr2	202987965	202988205	NR_135243	729224	-6319	KIAA2012-AS1	KIAA2012 antisense RNA 1	ncRNA	NO
chr2	205129627	205129777	chr2	205129752	205129895	NM_057177	117583	-280496	PARD3B	par-3 family cell polarity regulator beta	protein-coding	NO
chr2	208297403	208297553	chr2	208297115	208297758			-97208				YES
chr2	212399263	212399413	chr2	212399208	212399809	NR_031643	100313771	891746	MIR548F2	microRNA 548f-2	ncRNA	NO
chr2	215442517	215442667	chr2	215442400	215442850	NR_047698	100885780	67686	VWC2L-IT1	VWC2L intronic transcript 1	ncRNA	NO
chr2	217728745	217728895	chr2	217728640	217729030	NR_135525	105373876	3712	LOC105373876	uncharacterized LOC105373876	ncRNA	NO
chr2	230138175	230138325	chr2	230138115	230138367	NM_017933	55022	-2247	PID1	phosphotyrosine interaction domain containing 1	protein-coding	NO
chr2	236773927	236774077	chr2	236771800	236776475	NM_001485	2637	303027	GBX2	gastrulation brain homeobox 2	protein-coding	NO
chr20	11108953	11109103	chr20	11108780	11109390	NR_146878	728434	101836	C20orf187	chromosome 20 open reading frame 187 (putative)	ncRNA	NO
chr20	21026411	21026561	chr20	21026209	21026546	NR_147212	105372556	60513	LINC00237	long intergenic non-protein coding RNA 237	ncRNA	NO
chr20	36479403	36479553	chr20	36479495	36479673	NM_080607	128434	-52051	VSTM2L	V-set and transmembrane domain containing 2 like	protein-coding	YES
chr20	38169894	38170044	chr20	38169985	38170188	NR_027124	339568	-316578	LINC01734	long intergenic non-protein coding RNA 1734	ncRNA	NO
chr20	48863459	48863609	chr20	48863588	48863643	NM_001278655	100506115	-20489	SMIM25	small integral membrane protein 25	protein-coding	NO
chr20	51981315	51981465	chr20	51981200	51981370	NM_173485	128553	179568	TSHZ2	teashirt zinc finger homeobox 2	protein-coding	NO
chr20	56846929	56847079	chr20	56846854	56847210	NM_018498	55370	37491	PPP4R1L	protein phosphatase 4 regulatory subunit 1 like (pseudogene)	pseudo	NO
chr20	61733619	61733769	chr20	61733446	61733630	NR_003245	768097	-23	HAR1B	highly accelerated region 1B	ncRNA	NO
chr21	17443509	17443659	chr21	17443380	17443790	NR_027790	388815	150	MIR99AHG	mir-99a-let-7c cluster host gene	ncRNA	NO
chr21	36604947	36605097	chr21	36605081	36605243	NM_001754	861	-183427	RUNX1	RUNX family transcription factor 1	protein-coding	NO
chr21	45502807	45502957	chr21	45502400	45502940	NM_003274	7109	8677	TRAPPC10	trafficking protein particle complex 10	protein-coding	YES
chr22	28145197	28145347	chr22	28145200	28145355	NM_002430	4330	52472	MN1	MN1 proto-oncogene- transcriptional regulator	protein-coding	YES
chr22	43400389	43400539	chr22	43400516	43400688	NM_007229	11252	10691	PACSIN2	protein kinase C and casein kinase substrate in neurons 2	protein-coding	NO
chr3	609535	609685	chr3	609533	609805	NR_110118	101927215	-24178	LINC01266	long intergenic non-protein coding RNA 1266	ncRNA	NO
chr3	1237817	1237967	chr3	1237640	1237970	NM_014461	27255	103184	CNTN6	contactin 6	protein-coding	NO
chr3	2137939	2138089	chr3	2137725	2138157	NM_175607	152330	-2473	CNTN4	contactin 4	protein-coding	NO
chr3	2681837	2681987	chr3	2681614	2681842	NM_175607	152330	-251987	CNTN4	contactin 4	protein-coding	NO
chr3	2783761	2783911	chr3	2783280	2783850	NM_175607	152330	-150063	CNTN4	contactin 4	protein-coding	NO
chr3	4774777	4774927	chr3	4774718	4774920	NR_004428	100126791	18422	EGOT	eosinophil granule ontogeny transcript	ncRNA	NO
chr3	5468061	5468211	chr3	5467965	5468145	NR_039953	100616334	-176196	MIR4790	microRNA 4790	ncRNA	NO
chr3	16923843	16923993	chr3	16923375	16928375	NM_015184	23228	-2530	PLCL2	phospholipase C like 2	protein-coding	NO
chr3	16925844	16925994	chr3	16923375	16928375	NM_015184	23228	-529	PLCL2	phospholipase C like 2	protein-coding	NO
chr3	16927783	16927933	chr3	16923375	16928375	NM_015184	23228	1410	PLCL2	phospholipase C like 2	protein-coding	NO
chr3	27952051	27952201	chr3	27951920	27952069	NR_132438	100996624	-76499	LINC01981	long intergenic non-protein coding RNA 1981	ncRNA	NO
chr3	29482047	29482197	chr3	29482120	29482455	NM_014483	27303	159319	RBMS3	RNA binding motif single stranded interacting protein 3	protein-coding	NO
chr3	34354105	34354255	chr3	34354205	34354464	NM_013374	10015	514058	PDCD6IP	programmed cell death 6 interacting protein	protein-coding	NO
chr3	54383211	54383361	chr3	54383358	54383647	NM_018398	55799	226707	CACNA2D3	calcium voltage-gated channel auxiliary subunit alpha2delta 3	protein-coding	NO
chr3	55292429	55292579	chr3	55292492	55292739	NR_147142	105377096	80304	LINC02017	long intergenic non-protein coding RNA 2017	ncRNA	NO
chr3	55613645	55613795	chr3	55613456	55613807	NR_024615	711	79777	ERC2-IT1	ERC2 intronic transcript 1	ncRNA	NO
chr3	56037067	56037217	chr3	56037062	56037632	NR_037502	100500875	-150520	MIR3938	microRNA 3938	ncRNA	NO
chr3	58810333	58810483	chr3	58810252	58810482	NR_110820	101929238	211	C3orf67-AS1	C3orf67 antisense RNA 1	ncRNA	NO
chr3	63953769	63953919	chr3	63953580	63953820	NM_000333	6314	374	ATXN7	ataxin 7	protein-coding	NO
chr3	64429649	64429799	chr3	64429564	64429781	NR_110150	101929335	-117298	ADAMTS9-AS1	ADAMTS9 antisense RNA 1	ncRNA	NO
chr3	65869377	65869527	chr3	65869200	65869630	NR_046575	100873983	-10039	MAGI1-AS1	MAGI1 antisense RNA 1	ncRNA	NO
chr3	67948272	67948422	chr3	67948153	67948696	NM_213609	407738	-92387	TAFA1	TAFA chemokine like family member 1	protein-coding	NO
chr3	70299527	70299677	chr3	70299667	70300025	NM_001364676	107986096	62187	MDFIC2	MyoD family inhibitor domain containing 2	protein-coding	NO
chr3	85758818	85758968	chr3	85758554	85759040	NM_153184	253559	-16739	CADM2	cell adhesion molecule 2	protein-coding	NO
chr3	86683634	86683784	chr3	86683570	86683906	NR_135563	101927494	152616	LINC02070	long intergenic non-protein coding RNA 2070	ncRNA	NO
chr3	107317983	107318133	chr3	107317832	107318292	NM_020235	56987	76249	BBX	BBX high mobility group box domain containing	protein-coding	NO
chr3	107725212	107725362	chr3	107724925	107725555	NM_001777	961	84648	CD47	CD47 molecule	protein-coding	YES
chr3	114137929	114138079	chr3	114137840	114138090	NR_121661	101929754	-34436	ZBTB20-AS5	ZBTB20 antisense RNA 5	ncRNA	NO
chr3	114273191	114273341	chr3	114272938	114273302	NM_015642	26137	69787	ZBTB20	zinc finger and BTB domain containing 20	protein-coding	NO
chr3	114304472	114304622	chr3	114304600	114305350	NM_015642	26137	38506	ZBTB20	zinc finger and BTB domain containing 20	protein-coding	NO
chr3	120364149	120364299	chr3	120363824	120364273	NM_000187	3081	36862	HGD	homogentisate 1-2-dioxygenase	protein-coding	NO
chr3	127168462	127168612	chr3	127168440	127168630	NR_110147	101927123	-59024	LINC02016	long intergenic non-protein coding RNA 2016	ncRNA	NO
chr3	139493461	139493611	chr3	139492300	139494200	NM_178177	349565	-96644	NMNAT3	nicotinamide nucleotide adenylyltransferase 3	protein-coding	NO
chr3	139493871	139494021	chr3	139492300	139494200	NM_178177	349565	-97054	NMNAT3	nicotinamide nucleotide adenylyltransferase 3	protein-coding	NO
chr3	140102989	140103139	chr3	140103136	140103291	NR_108084	101927808	124567	CLSTN2-AS1	CLSTN2 antisense RNA 1	ncRNA	NO
chr3	149086270	149086420	chr3	149086010	149086593	NM_014220	4071	9091	TM4SF1	transmembrane 4 L six family member 1	protein-coding	NO
chr3	150690294	150690444	chr3	150690235	150690501	NR_024066	116933	-96	CLRN1-AS1	CLRN1 antisense RNA 1	ncRNA	NO
chr3	150690467	150690617	chr3	150690235	150690501	NM_052995	7401	-28	CLRN1	clarin 1	protein-coding	NO
chr3	178785340	178785490	chr3	178785140	178785410	NM_022470	64393	4182	ZMAT3	zinc finger matrin-type 3	protein-coding	NO
chr3	182555646	182555796	chr3	182555637	182555812	NM_014616	23200	44429	ATP11B	ATPase phospholipid transporting 11B (putative)	protein-coding	NO
chr3	184396881	184397031	chr3	184396863	184396964	NM_022149	64110	32896	MAGEF1	MAGE family member F1	protein-coding	NO
chr3	185957171	185957321	chr3	185957096	185957395	NM_001346	1608	122777	DGKG	diacylglycerol kinase gamma	protein-coding	NO
chr3	185957374	185957524	chr3	185957096	185957395	NM_001346	1608	122574	DGKG	diacylglycerol kinase gamma	protein-coding	NO
chr3	193506571	193506721	chr3	193506570	193506772	NR_146718	105374285	55152	LINC02038	long intergenic non-protein coding RNA 2038	ncRNA	NO
chr4	13785833	13785983	chr4	13785680	13785863	NR_121681	101929071	129105	LINC01182	long intergenic non-protein coding RNA 1182	ncRNA	NO
chr4	16758755	16758905	chr4	16758780	16759210	NM_001290	9079	141438	LDB2	LIM domain binding 2	protein-coding	NO
chr4	16758971	16759121	chr4	16758780	16759210	NM_001290	9079	141222	LDB2	LIM domain binding 2	protein-coding	NO
chr4	20195743	20195893	chr4	20195240	20195950	NM_004787	9353	-57710	SLIT2	slit guidance ligand 2	protein-coding	NO
chr4	26208159	26208309	chr4	26208233	26208506	NM_005349	3516	-113098	RBPJ	recombination signal binding protein for immunoglobulin kappa J region	protein-coding	NO
chr4	26208342	26208492	chr4	26208233	26208506	NM_005349	3516	-112915	RBPJ	recombination signal binding protein for immunoglobulin kappa J region	protein-coding	NO
chr4	42150417	42150567	chr4	42150268	42150997	NM_207406	389206	4180	BEND4	BEN domain containing 4	protein-coding	NO
chr4	48082146	48082296	chr4	48081980	48082790	NM_003328	7294	54046	TXK	TXK tyrosine kinase	protein-coding	YES
chr4	54810095	54810245	chr4	54809800	54810210	NM_001011538	402176	43279	RPL21P44	ribosomal protein L21 pseudogene 44	pseudo	NO
chr4	58067209	58067359	chr4	58067120	58067405	NM_001553	3490	-90733	IGFBP7	insulin like growth factor binding protein 7	protein-coding	NO
chr4	58363319	58363469	chr4	58363425	58364875	NR_125907	101928851	71356	LINC02380	long intergenic non-protein coding RNA 2380	ncRNA	NO
chr4	58473938	58474088	chr4	58474034	58474363	NR_125907	101928851	181975	LINC02380	long intergenic non-protein coding RNA 2380	ncRNA	NO
chr4	81120235	81120385	chr4	81120192	81120292	NM_020226	56978	1653	PRDM8	PR/SET domain 8	protein-coding	NO
chr4	105342003	105342153	chr4	105341940	105342490	NR_125926	101929468	-70044	CXXC4-AS1	CXXC4 antisense RNA 1	ncRNA	NO
chr4	105342209	105342359	chr4	105341940	105342490	NR_125926	101929468	-69838	CXXC4-AS1	CXXC4 antisense RNA 1	ncRNA	NO
chr4	105346065	105346215	chr4	105345660	105346230	NR_125926	101929468	-65982	CXXC4-AS1	CXXC4 antisense RNA 1	ncRNA	NO
chr4	130283999	130284149	chr4	130284088	130284451	NM_173487	132321	266767	C4orf33	chromosome 4 open reading frame 33	protein-coding	NO
chr4	130284400	130284550	chr4	130284088	130284451	NM_173487	132321	267168	C4orf33	chromosome 4 open reading frame 33	protein-coding	NO
chr4	138683885	138684035	chr4	138683860	138684010	NR_146553	105377443	217075	LINC02172	long intergenic non-protein coding RNA 2172	ncRNA	NO
chr4	141856504	141856654	chr4	141856440	141856690	NM_015130	23158	-179040	TBC1D9	TBC1 domain family member 9	protein-coding	NO
chr4	146403203	146403353	chr4	146401950	146406025	NM_005900	4086	-208	SMAD1	SMAD family member 1	protein-coding	NO
chr4	146403801	146403951	chr4	146401950	146406025	NM_005900	4086	-81	SMAD1	SMAD family member 1	protein-coding	NO
chr4	153118455	153118605	chr4	153118393	153118620	NR_121627	100996286	96560	LINC02273	long intergenic non-protein coding RNA 2273	ncRNA	NO
chr4	154408992	154409142	chr4	154408995	154409108	NM_015196	23240	21555	TMEM131L	transmembrane 131 like	protein-coding	NO
chr4	175031415	175031565	chr4	175031042	175031452	NR_125896	101928509	110059	LINC02268	long intergenic non-protein coding RNA 2268	ncRNA	NO
chr4	178273018	178273168	chr4	178272898	178273376	NM_018248	55247	42065	NEIL3	nei like DNA glycosylase 3	protein-coding	NO
chr4	182156611	182156761	chr4	182156318	182156882	NR_149139	101928679	29496	LINC02500	long intergenic non-protein coding RNA 2500	ncRNA	NO
chr4	182272282	182272432	chr4	182271860	182272882	NR_149139	101928679	-86175	LINC02500	long intergenic non-protein coding RNA 2500	ncRNA	NO
chr4	183228725	183228875	chr4	183228820	183229250	NM_001080477	55714	64245	TENM3	teneurin transmembrane protein 3	protein-coding	NO
chr4	183505304	183505454	chr4	183505191	183505547	NM_001921	1635	333027	DCTD	dCMP deaminase	protein-coding	NO
chr4	183717021	183717171	chr4	183717100	183717635	NM_001921	1635	121310	DCTD	dCMP deaminase	protein-coding	NO
chr4	184882398	184882548	chr4	184882413	184882487	NM_020225	56977	56013	STOX2	storkhead box 2	protein-coding	NO
chr5	418805	418955	chr5	418889	419087	NM_138464	116349	24395	EXOC3-AS1	EXOC3 antisense RNA 1	ncRNA	NO
chr5	3428405	3428555	chr5	3428083	3428629	NR_147000	105374624	-24450	LINC02162	long intergenic non-protein coding RNA 2162	ncRNA	NO
chr5	3428585	3428735	chr5	3428083	3428629	NR_147000	105374624	-24270	LINC02162	long intergenic non-protein coding RNA 2162	ncRNA	NO
chr5	13957037	13957187	chr5	13957142	13957257	NM_001369	1767	-12523	DNAH5	dynein axonemal heavy chain 5	protein-coding	YES
chr5	13957234	13957384	chr5	13957142	13957257	NM_001369	1767	-12720	DNAH5	dynein axonemal heavy chain 5	protein-coding	YES
chr5	28215481	28215631	chr5	28215200	28215750	NR_134265	105374698	72216	LINC02103	long intergenic non-protein coding RNA 2103	ncRNA	NO
chr5	39527187	39527337	chr5	39527254	39527432	NR_104632	101926940	6729	LINC02104	long intergenic non-protein coding RNA 2104	ncRNA	NO
chr5	87776699	87776849	chr5	87776609	87777183	NR_105021	102546226	-41867	LINC02060	long intergenic non-protein coding RNA 2060	ncRNA	NO
chr5	88753808	88753958	chr5	88753780	88754150	NM_002397	4208	-553961	MEF2C	myocyte enhancer factor 2C	protein-coding	NO
chr5	88754040	88754190	chr5	88753780	88754150	NM_002397	4208	-554193	MEF2C	myocyte enhancer factor 2C	protein-coding	NO
chr5	92413967	92414117	chr5	92413618	92413987	NR_015369	441094	493007	NR2F1-AS1	NR2F1 antisense RNA 1	ncRNA	NO
chr5	102276995	102277145	chr5	102276780	102277170	NM_000919	5066	75543	PAM	peptidylglycine alpha-amidating monooxygenase	protein-coding	NO
chr5	102633965	102634115	chr5	102634000	102634317	NM_033211	90355	38915	C5orf30	chromosome 5 open reading frame 30	protein-coding	NO
chr5	106712777	106712927	chr5	106712502	106713050	NM_001962	1946	293786	EFNA5	ephrin A5	protein-coding	NO
chr5	107099643	107099793	chr5	107099696	107100011	NM_001962	1946	-93080	EFNA5	ephrin A5	protein-coding	NO
chr5	116770220	116770370	chr5	116770254	116770563	NR_046089	728342	19087	LINC00992	long intergenic non-protein coding RNA 992	ncRNA	NO
chr5	122492155	122492305	chr5	122491700	122494275	NR_146771	105379152	-66219	LOC105379152	uncharacterized LOC105379152	ncRNA	NO
chr5	122492337	122492487	chr5	122491700	122494275	NR_146771	105379152	-66401	LOC105379152	uncharacterized LOC105379152	ncRNA	NO
chr5	123628219	123628369	chr5	123628079	123628764	NR_125774	103724389	145919	LINC01170	long intergenic non-protein coding RNA 1170	ncRNA	NO
chr5	124385597	124385747	chr5	124385623	124385842	NR_109882	101927421	13148	LOC101927421	uncharacterized LOC101927421	ncRNA	NO
chr5	124726027	124726177	chr5	124725950	124726350	NR_109887	101927460	-102852	LINC02240	long intergenic non-protein coding RNA 2240	ncRNA	NO
chr5	125312443	125312593	chr5	125312218	125312658	NR_105042	102546228	-202752	LINC02039	long intergenic non-protein coding RNA 2039	ncRNA	NO
chr5	134451389	134451539	chr5	134451133	134451428	NR_105049	101927953	-75727	C5orf66-AS1	C5orf66 antisense RNA 1	ncRNA	NO
chr5	142005213	142005363	chr5	142005180	142005550	NM_000800	2246	-4389	FGF1	fibroblast growth factor 1	protein-coding	YES
chr5	142547979	142548129	chr5	142547844	142548094	NR_046816	100874372	-24011	ARHGAP26-IT1	ARHGAP26 intronic transcript 1	ncRNA	NO
chr5	146079613	146079763	chr5	146079343	146079744	NM_181674	5521	178660	PPP2R2B	protein phosphatase 2 regulatory subunit Bbeta	protein-coding	NO
chr5	151462891	151463041	chr5	151462960	151463170	NR_109876	101927115	124507	LINC01933	long intergenic non-protein coding RNA 1933	ncRNA	NO
chr5	154436751	154436901	chr5	154436743	154436828	NM_001099293	285643	43511	KIF4B	kinesin family member 4B	protein-coding	NO
chr5	158635262	158635412	chr5	158635020	158635355	NM_144726	153830	-256	RNF145	ring finger protein 145	protein-coding	NO
chr5	164259673	164259823	chr5	164259465	164260238	NR_105065	102546299	362463	LOC102546299	uncharacterized LOC102546299	ncRNA	NO
chr5	168313231	168313381	chr5	168313300	168313470	NR_029632	407001	-118046	MIR218-2	microRNA 218-2	ncRNA	NO
chr5	175177645	175177795	chr5	175177656	175177879	NM_006650	10814	-45816	CPLX2	complexin 2	protein-coding	NO
chr6	710734	710884	chr6	710676	710853	NM_018303	55770	-17668	EXOC2	exocyst complex component 2	protein-coding	YES
chr6	1554855	1555005	chr6	1554959	1555029	NR_125804	101927703	-50836	FOXCUT	FOXC1 upstream transcript	ncRNA	NO
chr6	1626317	1626467	chr6	1626280	1626610	NM_001453	2296	16242	FOXC1	forkhead box C1	protein-coding	YES
chr6	5167925	5168075	chr6	5167780	5168070	NR_037462	100500900	-19444	MIR3691	microRNA 3691	ncRNA	NO
chr6	9516304	9516454	chr6	9516160	9516406	NR_004855	728655	863937	HULC	hepatocellular carcinoma up-regulated long non-coding RNA	ncRNA	NO
chr6	9802113	9802263	chr6	9802236	9802500	NR_145448	109729173	-602547	TFAP2A-AS2	TFAP2A antisense RNA 2	ncRNA	NO
chr6	11607759	11607909	chr6	11607620	11608050	NM_001100829	100113407	69852	TMEM170B	transmembrane protein 170B	protein-coding	NO
chr6	19976895	19977045	chr6	19976428	19977397	NM_001546	3400	139369	ID4	inhibitor of DNA binding 4- HLH protein	protein-coding	NO
chr6	23663679	23663829	chr6	23663651	23663828	NM_080723	140767	-462689	NRSN1	neurensin 1	protein-coding	NO
chr6	35564481	35564631	chr6	35564369	35564646	NR_049873	100847048	68010	MIR5690	microRNA 5690	ncRNA	NO
chr6	46012707	46012857	chr6	46012640	46012930	NM_016929	53405	-29156	CLIC5	chloride intracellular channel 5	protein-coding	NO
chr6	46922697	46922847	chr6	46922380	46922900	NM_015234	221395	-96	ADGRF5	adhesion G protein-coupled receptor F5	protein-coding	NO
chr6	50431934	50432084	chr6	50431581	50432232	NM_172238	83741	-249248	TFAP2D	transcription factor AP-2 delta	protein-coding	NO
chr6	50992289	50992439	chr6	50992161	50992302	NM_003221	7021	205780	TFAP2B	transcription factor AP-2 beta	protein-coding	NO
chr6	51339243	51339393	chr6	51339378	51339689	NR_125840	101927082	-147350	LOC101927082	uncharacterized LOC101927082	ncRNA	NO
chr6	55433587	55433737	chr6	55433712	55434034	NM_019036	54511	10350	HMGCLL1	3-hydroxymethyl-3-methylglutaryl-CoA lyase like 1	protein-coding	NO
chr6	86818019	86818169	chr6	86818026	86818274	NR_003038	387066	-429643	SNHG5	small nucleolar RNA host gene 5	ncRNA	NO
chr6	93472525	93472675	chr6	93472080	93472790	NM_004440	2045	656677	EPHA7	EPH receptor A7	protein-coding	NO
chr6	98298595	98298745	chr6	98298514	98299052	NR_031579	100302164	-173737	MIR2113	microRNA 2113	ncRNA	NO
chr6	99164313	99164463	chr6	99164207	99164627	NR_148381	105447646	115188	PNKY	long intergenic non-protein coding RNA PNKY	ncRNA	NO
chr6	99425344	99425494	chr6	99424935	99425930	NM_012160	26235	-29537	FBXL4	F-box and leucine rich repeat protein 4	protein-coding	NO
chr6	101744240	101744390	chr6	101744148	101744422	NM_021956	2898	-102546	GRIK2	glutamate ionotropic receptor kainate type subunit 2	protein-coding	NO
chr6	106052194	106052344	chr6	106052103	106052293	NM_002726	5550	-201312	PREP	prolyl endopeptidase	protein-coding	NO
chr6	124377963	124378113	chr6	124377834	124378344	NM_153355	154215	-226113	NKAIN2	sodium/potassium transporting ATPase interacting 2	protein-coding	NO
chr6	140887746	140887896	chr6	140887760	140888180	NR_039675	100616180	-117130	MIR4465	microRNA 4465	ncRNA	NO
chr6	143279451	143279601	chr6	143279451	143279742	NM_006734	3097	-13213	HIVEP2	human immunodeficiency virus type I enhancer binding protein 2	protein-coding	NO
chr6	148270047	148270197	chr6	148269986	148270238	NM_015278	23328	-323342	SASH1	SAM and SH3 domain containing 1	protein-coding	YES
chr6	148455806	148455956	chr6	148455819	148456050	NM_015278	23328	-137583	SASH1	SAM and SH3 domain containing 1	protein-coding	YES
chr6	149557915	149558065	chr6	149557763	149558153	NM_015093	23118	18928	TAB2	TGF-beta activated kinase 1 (MAP3K7) binding protein 2	protein-coding	NO
chr6	164985191	164985341	chr6	164984980	164985290	NR_131926	105378111	250286	MEAT6	melanoma-associated transcript 6	ncRNA	NO
chr7	7812163	7812313	chr7	7811996	7812540	NM_002947	6119	-54000	RPA3	replication protein A3	protein-coding	NO
chr7	8230081	8230231	chr7	8230081	8230271	NM_004968	3382	71526	ICA1	islet cell autoantigen 1	protein-coding	NO
chr7	8418975	8419125	chr7	8418920	8419230	NM_152745	30010	-54189	NXPH1	neurexophilin 1	protein-coding	NO
chr7	11766129	11766279	chr7	11765813	11766293	NM_015204	221981	105620	THSD7A	thrombospondin type 1 domain containing 7A	protein-coding	NO
chr7	15392176	15392326	chr7	15391919	15392272	NM_001004320	392636	209389	AGMO	alkylglycerol monooxygenase	protein-coding	NO
chr7	23146555	23146705	chr7	23146520	23147230	NM_018846	55975	350	KLHL7	kelch like family member 7	protein-coding	NO
chr7	25280039	25280189	chr7	25280063	25280199	NM_022150	64111	-12009	NPVF	neuropeptide VF precursor	protein-coding	NO
chr7	26765797	26765947	chr7	26765820	26765970	NR_161201	285941	88382	C7orf71	chromosome 7 open reading frame 71	ncRNA	NO
chr7	31232703	31232853	chr7	31232560	31232875	NM_001118	117	140702	ADCYAP1R1	ADCYAP receptor type I	protein-coding	NO
chr7	33633547	33633697	chr7	33633605	33633916	NM_133468	168667	-310905	BMPER	BMP binding endothelial regulator	protein-coding	YES
chr7	69188035	69188185	chr7	69187880	69188250	NM_015570	26053	124649	AUTS2	activator of transcription and developmental regulator AUTS2	protein-coding	NO
chr7	69901825	69901975	chr7	69901775	69902226	NM_022479	64409	-695230	GALNT17	polypeptide N-acetylgalactosaminyltransferase 17	protein-coding	NO
chr7	90756107	90756257	chr7	90755764	90756159	NM_003505	8321	-137566	FZD1	frizzled class receptor 1	protein-coding	YES
chr7	92875217	92875367	chr7	92875117	92875340	NM_017667	55610	13613	VPS50	VPS50 subunit of EARP/GARPII complex	protein-coding	NO
chr7	101249414	101249564	chr7	101249296	101249680	NM_138403	93408	23087	MYL10	myosin light chain 10	protein-coding	NO
chr7	132099671	132099821	chr7	132099657	132100019	NR_134565	101928807	154126	LOC101928807	uncharacterized LOC101928807	ncRNA	NO
chr7	147556061	147556211	chr7	147556210	147556510	NR_133929	105375556	187365	LOC105375556	uncharacterized LOC105375556	ncRNA	NO
chr7	147870614	147870764	chr7	147870488	147870997	NM_145304	202865	-417169	C7orf33	chromosome 7 open reading frame 33	protein-coding	NO
chr7	152999251	152999401	chr7	152999040	152999310	NR_125776	103724390	109993	LINC01287	long intergenic non-protein coding RNA 1287	ncRNA	NO
chr8	1649521	1649671	chr8	1649165	1649870	NR_134302	101927752	61904	LOC101927752	uncharacterized LOC101927752	ncRNA	NO
chr8	1649744	1649894	chr8	1649165	1649870	NR_134302	101927752	61681	LOC101927752	uncharacterized LOC101927752	ncRNA	NO
chr8	13008003	13008153	chr8	13008025	13008319	NM_006094	10395	-17280	DLC1	DLC1 Rho GTPase activating protein	protein-coding	NO
chr8	13729827	13729977	chr8	13729834	13729916	NR_134450	102725080	242703	LOC102725080	uncharacterized LOC102725080	ncRNA	NO
chr8	14386791	14386941	chr8	14386849	14387014	NR_029875	494332	324153	MIR383	microRNA 383	ncRNA	NO
chr8	15095738	15095888	chr8	15095428	15095812	NM_139167	137868	127	SGCZ	sarcoglycan zeta	protein-coding	NO
chr8	17474949	17475099	chr8	17475085	17475249	NM_006207	5157	41082	PDGFRL	platelet derived growth factor receptor like	protein-coding	NO
chr8	19706461	19706611	chr8	19706591	19706981	NM_018142	55174	31609	INTS10	integrator complex subunit 10	protein-coding	NO
chr8	20676703	20676853	chr8	20676818	20677049	NR_130773	102467222	-134366	LOC102467222	uncharacterized LOC102467222	ncRNA	NO
chr8	20834823	20834973	chr8	20834854	20834988	NR_033894	286114	3401	LINC02153	long intergenic non-protein coding RNA 2153	ncRNA	NO
chr8	27752824	27752974	chr8	27752600	27753030	NR_036249	100422828	-9266	MIR4287	microRNA 4287	ncRNA	NO
chr8	40068319	40068469	chr8	40068200	40068610	NM_020130	56892	57393	TCIM	transcriptional and immune response regulator	protein-coding	NO
chr8	56805742	56805892	chr8	56805800	56806060	NR_145767	109617001	9597	SNORA1B	small nucleolar RNA- H/ACA box 1B	snoRNA	NO
chr8	58779487	58779637	chr8	58779560	58779890	NR_130934	100505477	-111355	LINC01602	long intergenic non-protein coding RNA 1602	ncRNA	NO
chr8	60952593	60952743	chr8	60952575	60952689	NM_004056	767	241291	CA8	carbonic anhydrase 8	protein-coding	NO
chr8	62006519	62006669	chr8	62006300	62006670	NR_034003	100130298	-126287	LOC100130298	hCG1816373-like	ncRNA	NO
chr8	76636532	76636682	chr8	76636560	76636835	NM_004133	3174	184404	HNF4G	hepatocyte nuclear factor 4 gamma	protein-coding	NO
chr8	92021061	92021211	chr8	92020860	92021350	NM_001190972	100127983	-23670	C8orf88	chromosome 8 open reading frame 88	protein-coding	NO
chr8	92543368	92543518	chr8	92543487	92543632	NM_052832	115111	281896	SLC26A7	solute carrier family 26 member 7	protein-coding	NO
chr8	94090745	94090895	chr8	94090760	94091090	NR_107051	102467005	48841	MIR8084	microRNA 8084	ncRNA	NO
chr8	108216929	108217079	chr8	108216550	108216935	NM_001146	284	131739	ANGPT1	angiopoietin 1	protein-coding	NO
chr8	122796981	122797131	chr8	122796775	122797067	NM_005328	3037	-143376	HAS2	hyaluronan synthase 2	protein-coding	NO
chr8	130697970	130698120	chr8	130697926	130698161	NR_130917	137196	-5560	CCDC26	CCDC26 long non-coding RNA	ncRNA	NO
chr8	144561580	144561730	chr8	144561586	144562054	NR_145785	109623485	26763	SNORD149	small nucleolar RNA- C/D box 149	snoRNA	NO
chr9	272923	273073	chr9	272805	273130	NM_203447	81704	-48	DOCK8	dedicator of cytokinesis 8	protein-coding	YES
chr9	469865	470015	chr9	469645	470020	NM_015158	23189	-351	KANK1	KN motif and ankyrin repeat domains 1	protein-coding	NO
chr9	2159871	2160021	chr9	2159560	2160390	NM_003070	6595	1490	SMARCA2	SWI/SNF related- matrix associated- actin dependent regulator of chromatin- subfamily a- member 2	protein-coding	YES
chr9	2242092	2242242	chr9	2241880	2242215	NM_003070	6595	83711	SMARCA2	SWI/SNF related- matrix associated- actin dependent regulator of chromatin- subfamily a- member 2	protein-coding	YES
chr9	2623125	2623275	chr9	2623240	2623780	NR_015375	401491	-827	VLDLR-AS1	VLDLR antisense RNA 1	ncRNA	NO
chr9	3856699	3856849	chr9	3856422	3856797	NM_032764	84850	-41872	GLIS3-AS1	GLIS3 antisense RNA 1	ncRNA	NO
chr9	3887219	3887369	chr9	3886993	3887653	NM_032764	84850	-11352	GLIS3-AS1	GLIS3 antisense RNA 1	ncRNA	NO
chr9	8532263	8532413	chr9	8532063	8532343	NM_002839	5789	201608	PTPRD	protein tyrosine phosphatase receptor type D	protein-coding	NO
chr9	16138946	16139096	chr9	16138580	16139590	NM_001271829	100129385	114084	C9orf92	chromosome 9 open reading frame 92	protein-coding	NO
chr9	16139388	16139538	chr9	16138580	16139590	NM_001271829	100129385	113642	C9orf92	chromosome 9 open reading frame 92	protein-coding	NO
chr9	16626949	16627099	chr9	16626841	16627182	NR_151723	111216284	-99788	BNC2-AS1	BNC2 antisense RNA 1	ncRNA	NO
chr9	16679606	16679756	chr9	16679328	16679850	NR_151723	111216284	-47131	BNC2-AS1	BNC2 antisense RNA 1	ncRNA	NO
chr9	16708990	16709140	chr9	16707947	16709850	NR_151723	111216284	-17747	BNC2-AS1	BNC2 antisense RNA 1	ncRNA	NO
chr9	26205369	26205519	chr9	26205085	26205671	NM_001004352	100506422	138771	LOC100506422	putative deoxyuridine 5'-triphosphate nucleotidohydrolase-like protein FLJ16323	protein-coding	NO
chr9	26219963	26220113	chr9	26219938	26220248	NM_001004352	100506422	153365	LOC100506422	putative deoxyuridine 5'-triphosphate nucleotidohydrolase-like protein FLJ16323	protein-coding	NO
chr9	71819949	71820099	chr9	71819680	71820175	NM_004817	9414	-47	TJP2	tight junction protein 2	protein-coding	YES
chr9	74296197	74296347	chr9	74296120	74296600	NM_013390	23670	87157	CEMIP2	cell migration inducing hyaluronidase 2	protein-coding	NO
chr9	80454729	80454879	chr9	80454869	80454997	NM_004297	9630	-191566	GNA14	G protein subunit alpha 14	protein-coding	NO
chr9	82282907	82283057	chr9	82283020	82283350	NM_007005	7091	94890	TLE4	TLE family member 4- transcriptional corepressor	protein-coding	YES
chr9	82518002	82518152	chr9	82517647	82518323	NR_121212	101927477	-71861	LINC01507	long intergenic non-protein coding RNA 1507	ncRNA	NO
chr9	82551349	82551499	chr9	82551090	82551543	NR_121212	101927477	-38514	LINC01507	long intergenic non-protein coding RNA 1507	ncRNA	NO
chr9	83168015	83168165	chr9	83167985	83168225	NR_121212	101927477	578152	LINC01507	long intergenic non-protein coding RNA 1507	ncRNA	NO
chr9	98803254	98803404	chr9	98803060	98803360	NR_024129	100188953	-19236	LINC00092	long intergenic non-protein coding RNA 92	ncRNA	NO
chr9	98811843	98811993	chr9	98811345	98812075	NR_033838	158435	-16203	LOC158435	uncharacterized LOC158435	ncRNA	NO
chr9	102495203	102495353	chr9	102495040	102495410	NR_109802	101928438	86893	LOC101928438	uncharacterized LOC101928438	ncRNA	NO
chr9	109378361	109378511	chr9	109378256	109378583	NR_104145	100996590	97	LINC01505	long intergenic non-protein coding RNA 1505	ncRNA	NO
chr9	125043797	125043947	chr9	125043820	125044490	NM_138777	92399	16711	MRRF	mitochondrial ribosome recycling factor	protein-coding	NO
chr9	128907006	128907156	chr9	128906852	128907165	NR_121584	101929116	131113	LOC101929116	uncharacterized LOC101929116	ncRNA	NO
chrX	22410568	22410718	chrX	22410280	22410760	NM_152577	158506	119613	CBLL2	Cbl proto-oncogene like 2	protein-coding	NO
chrX	32011863	32012013	chrX	32011910	32012141	NM_000109	1756	161648	DMD	dystrophin	protein-coding	NO
chrX	42101294	42101444	chrX	42101179	42101370	NM_003688	8573	-318562	CASK	calcium/calmodulin dependent serine protein kinase	protein-coding	NO
chrX	100001137	100001287	chrX	100001199	100001549	NM_080737	94121	-14104	SYTL4	synaptotagmin like 4	protein-coding	NO
chrX	137792809	137792959	chrX	137792645	137793565	NM_004114	2258	995	FGF13	fibroblast growth factor 13	protein-coding	NO
chrX	154998217	154998367	chrX	154998125	154998414	NM_005840	10251	895	SPRY3	sprouty RTK signaling antagonist 3	protein-coding	NO

## Sheet: ADULT-BIASED
chr	start	end	HAR.chr	HAR.start	HAR.end	Nearest.Refseq.Gene	Entrez.ID	Nearest.TSS	Gene.Symbol	Gene.Description	Gene.Type	Contacts?
chr1	11508035	11508185	chr1	11507933	11508064	NM_020780	57540	-31102	DISP3	dispatched RND transporter family member 3	protein-coding	NO
chr1	44832401	44832551	chr1	44832492	44832773	NM_024066	79033	-11525	ERI3	ERI1 exoribonuclease family member 3	protein-coding	NO
chr1	44832767	44832917	chr1	44832492	44832773	NM_024066	79033	-11891	ERI3	ERI1 exoribonuclease family member 3	protein-coding	NO
chr1	177009443	177009593	chr1	177009234	177009502	NR_030163	574441	-10937	MIR488	microRNA 488	ncRNA	NO
chr1	228637054	228637204	chr1	228636832	228637153	NM_033445	92815	8431	HIST3H2A	histone cluster 3 H2A	protein-coding	NO
chr10	48557667	48557817	chr10	48557700	48558350	NM_004962	2662	-118577	GDF10	growth differentiation factor 10	protein-coding	NO
chr10	77813969	77814119	chr10	77814087	77814528	NM_032024	83938	271525	LRMDA	leucine rich melanocyte differentiation associated	protein-coding	NO
chr10	80093658	80093808	chr10	80093651	80093740	NR_073447	414243	66634	LINC00595	long intergenic non-protein coding RNA 595	ncRNA	NO
chr10	98381301	98381451	chr10	98381190	98381361	NM_020123	56889	-34607	TM9SF3	transmembrane 9 superfamily member 3	protein-coding	YES
chr10	100605434	100605584	chr10	100605545	100605708	NR_106762	102465253	78816	MIR6507	microRNA 6507	ncRNA	NO
chr11	83421317	83421467	chr11	83420525	83422950	NM_001364	1740	-27924	DLG2	discs large MAGUK scaffold protein 2	protein-coding	NO
chr11	89232219	89232369	chr11	89231856	89232323	NM_016931	50507	-6907	NOX4	NADPH oxidase 4	protein-coding	NO
chr11	111309985	111310135	chr11	111309790	111309991	NR_046085	100132078	-21149	LOC100132078	uncharacterized LOC100132078	ncRNA	NO
chr11	114799373	114799523	chr11	114799193	114799383	NM_182495	120406	250199	NXPE2	neurexophilin and PC-esterase domain family member 2	protein-coding	NO
chr11	119851023	119851173	chr11	119851124	119851295	NM_012101	23650	148463	TRIM29	tripartite motif containing 29	protein-coding	NO
chr12	96384119	96384269	chr12	96384165	96384322	NM_002108	3034	5928	HAL	histidine ammonia-lyase	protein-coding	NO
chr12	98126435	98126585	chr12	98126179	98127046	NR_077240	643711	20866	LOC643711	platelet activating factor acetylhydrolase 1b catalytic subunit 2 pseudogene	pseudo	NO
chr12	98127042	98127192	chr12	98126179	98127046	NR_077240	643711	20259	LOC643711	platelet activating factor acetylhydrolase 1b catalytic subunit 2 pseudogene	pseudo	NO
chr12	114467929	114468079	chr12	114467996	114468201	NM_016196	9904	-63874	RBM19	RNA binding motif protein 19	protein-coding	NO
chr12	130548671	130548821	chr12	130548545	130548710	NR_146538	105370078	-7134	LINC02419	long intergenic non-protein coding RNA 2419	ncRNA	NO
chr13	19526890	19527040	chr13	19526878	19527035	NR_104118	100652856	47386	LINC00408	long intergenic non-protein coding RNA 408	ncRNA	NO
chr13	99842917	99843067	chr13	99842842	99843029	NR_036531	100289373	10017	UBAC2-AS1	UBAC2 antisense RNA 1	ncRNA	NO
chr14	21190543	21190693	chr14	21190384	21191218	NM_006683	10876	-23428	EDDM3A	epididymal protein 3A	protein-coding	YES
chr14	82128463	82128613	chr14	82128607	82129254	NR_110074	101928559	-39133	LINC01467	long intergenic non-protein coding RNA 1467	ncRNA	NO
chr15	22780725	22780875	chr15	22780708	22780875	NM_001271664	440243	44532	GOLGA6L22	golgin A6 family like 22	protein-coding	NO
chr15	70306357	70306507	chr15	70306080	70306390	NR_030714	693214	65375	MIR629	microRNA 629	ncRNA	NO
chr16	18025518	18025668	chr16	18025366	18025531	NM_001282507	101059938	400926	NPIPA7	nuclear pore complex interacting protein family member A7	protein-coding	NO
chr16	31693159	31693309	chr16	31693118	31693231	NM_024048	100132341	-18700	CLUHP3	clustered mitochondria homolog pseudogene 3	pseudo	NO
chr16	48368363	48368513	chr16	48368381	48368543	NM_003031	6477	31360	SIAH1	siah E3 ubiquitin protein ligase 1	protein-coding	NO
chr16	51053057	51053207	chr16	51053172	51053411	NR_110913	101927334	1463	LINC02127	long intergenic non-protein coding RNA 2127	ncRNA	NO
chr16	62983765	62983915	chr16	62983906	62984264	NM_001796	1006	-913498	CDH8	cadherin 8	protein-coding	NO
chr17	6050223	6050373	chr17	6050355	6050576	NM_015253	23302	76364	WSCD1	WSC domain containing 1	protein-coding	YES
chr17	9756493	9756643	chr17	9756232	9756625	NM_004246	9340	27327	GLP2R	glucagon like peptide 2 receptor	protein-coding	YES
chr17	10883014	10883164	chr17	10883019	10883236	NM_001101387	644139	-141685	PIRT	phosphoinositide interacting regulator of transient receptor potential channels	protein-coding	NO
chr17	33235591	33235741	chr17	33235370	33235651	NM_006584	10693	52813	CCT6B	chaperonin containing TCP1 subunit 6B	protein-coding	NO
chr17	71159192	71159342	chr17	71159174	71159467	NM_001050	6752	-1882	SSTR2	somatostatin receptor 2	protein-coding	NO
chr17	73686938	73687088	chr17	73686725	73686970	NM_013260	29115	23595	SAP30BP	SAP30 binding protein	protein-coding	NO
chr18	21252293	21252443	chr18	21252213	21252713	NM_173505	147463	-9493	ANKRD29	ankyrin repeat domain 29	protein-coding	NO
chr18	73335353	73335503	chr18	73333375	73337100	NR_134646	100505853	88930	LINC01898	long intergenic non-protein coding RNA 1898	ncRNA	NO
chr18	73336501	73336651	chr18	73333375	73337100	NR_134646	100505853	87782	LINC01898	long intergenic non-protein coding RNA 1898	ncRNA	NO
chr19	13004889	13005039	chr19	13004946	13005696	NM_000159	2639	2990	GCDH	glutaryl-CoA dehydrogenase	protein-coding	NO
chr19	32560874	32561024	chr19	32560820	32561108	NR_110694	101927411	35873	LINC01782	long intergenic non-protein coding RNA 1782	ncRNA	NO
chr19	36090201	36090351	chr19	36090068	36090392	NR_110750	102723617	1479	LINC01766	long intergenic non-protein coding RNA 1766	ncRNA	NO
chr19	49533143	49533293	chr19	49533234	49533386	NR_024244	100170228	1826	SNAR-G2	small NF90 (ILF3) associated RNA G2	snRNA	NO
chr2	26792853	26793003	chr2	26792905	26793190	NM_001105519	339778	7473	C2orf70	chromosome 2 open reading frame 70	protein-coding	NO
chr2	27716261	27716411	chr2	27716160	27716650	NM_022823	64838	1731	FNDC4	fibronectin type III domain containing 4	protein-coding	NO
chr2	30087760	30087910	chr2	30087740	30087935	NM_004304	238	56617	ALK	ALK receptor tyrosine kinase	protein-coding	NO
chr2	119069350	119069500	chr2	119066625	119069475	NR_144530	100506797	-125463	THORLNC	testis associated oncogenic lncRNA	ncRNA	NO
chr2	174524385	174524535	chr2	174524179	174524435	NM_003111	6670	304148	SP3	Sp3 transcription factor	protein-coding	NO
chr2	176473721	176473871	chr2	176473588	176473730	NM_030650	80856	393199	LNPK	lunapark- ER junction formation factor	protein-coding	NO
chr2	208973079	208973229	chr2	208972996	208973133	NR_038437	100507443	-10699	LOC100507443	uncharacterized LOC100507443	ncRNA	NO
chr2	236772203	236772353	chr2	236771800	236776475	NM_001485	2637	304751	GBX2	gastrulation brain homeobox 2	protein-coding	NO
chr2	236775005	236775155	chr2	236771800	236776475	NM_001485	2637	301949	GBX2	gastrulation brain homeobox 2	protein-coding	NO
chr2	236775609	236775759	chr2	236771800	236776475	NM_001485	2637	301345	GBX2	gastrulation brain homeobox 2	protein-coding	NO
chr20	6631815	6631965	chr20	6631662	6632045	NR_146909	105372516	84893	LINC01713	long intergenic non-protein coding RNA 1713	ncRNA	NO
chr20	37712490	37712640	chr20	37712525	37712777	NM_021931	60625	121578	DHX35	DEAH-box helicase 35	protein-coding	NO
chr20	44853691	44853841	chr20	44853809	44854118	NM_021248	64405	83371	CDH22	cadherin 22	protein-coding	YES
chr21	46096763	46096913	chr21	46096900	46097077	NM_181686	353332	5240	KRTAP12-1	keratin associated protein 12-1	protein-coding	NO
chr22	38549255	38549405	chr22	38549322	38549487	NM_003560	8398	28507	PLA2G6	phospholipase A2 group VI	protein-coding	NO
chr3	10727057	10727207	chr3	10726994	10727090	NR_046766	100874325	-58640	ATP2B2-IT2	ATP2B2 intronic transcript 2	ncRNA	NO
chr3	39136851	39137001	chr3	39136440	39136870	NM_031899	64689	12192	GORASP1	golgi reassembly stacking protein 1	protein-coding	NO
chr3	52354319	52354469	chr3	52354240	52354470	NM_015512	25981	4059	DNAH1	dynein axonemal heavy chain 1	protein-coding	NO
chr3	68683221	68683371	chr3	68683182	68683507	NR_135532	105377146	133508	LOC105377146	uncharacterized LOC105377146	ncRNA	NO
chr4	25823538	25823688	chr4	25823251	25823544	NM_015187	23231	40997	SEL1L3	SEL1L family member 3	protein-coding	NO
chr4	57804593	57804743	chr4	57804457	57804684	NM_005612	5978	29589	REST	RE1 silencing transcription factor	protein-coding	NO
chr4	83049702	83049852	chr4	83049751	83050502	NM_002138	3184	245367	HNRNPD	heterogeneous nuclear ribonucleoprotein D	protein-coding	NO
chr5	5539997	5540147	chr5	5539725	5540070	NM_015325	23379	117282	ICE1	interactor of little elongation complex ELL subunit 1	protein-coding	NO
chr5	76948765	76948915	chr5	76948901	76949050	NM_032109	23440	-14318	OTP	orthopedia homeobox	protein-coding	NO
chr5	125948815	125948965	chr5	125948717	125949409	NM_032177	51808	12251	PHAX	phosphorylated adaptor for RNA export	protein-coding	NO
chr6	1287503	1287653	chr6	1287320	1287870	NM_033260	94234	-24755	FOXQ1	forkhead box Q1	protein-coding	NO
chr6	57563343	57563493	chr6	57563069	57564049	NR_036097	100422884	308488	MIR548U	microRNA 548u	ncRNA	NO
chr6	87142133	87142283	chr6	87141978	87142447	NM_000865	3354	-505038	HTR1E	5-hydroxytryptamine receptor 1E	protein-coding	NO
chr7	66019519	66019669	chr7	66019569	66019826	NR_002933	493754	37800	GS1-124K5.11	RAB guanine nucleotide exchange factor 1 pseudogene	pseudo	NO
chr7	134962069	134962219	chr7	134962012	134962161	NM_182489	346673	45413	STRA8	stimulated by retinoic acid 8	protein-coding	NO
chr7	137807319	137807469	chr7	137807190	137807503	NR_039678	100616226	-1110	MIR4468	microRNA 4468	ncRNA	NO
chr7	138564247	138564397	chr7	138564200	138564350	NM_020632	50617	-81381	ATP6V0A4	ATPase H+ transporting V0 subunit a4	protein-coding	YES
chr8	142470003	142470153	chr8	142470088	142470545	NM_007079	11156	38590	PTP4A3	protein tyrosine phosphatase 4A3	protein-coding	NO
chr9	1201729	1201879	chr9	1201875	1202104	NM_006557	10655	150317	DMRT2	doublesex and mab-3 related transcription factor 2	protein-coding	NO
chr9	36759703	36759853	chr9	36759848	36760096	NR_039686	100616289	63818	MIR4475	microRNA 4475	ncRNA	NO
chr9	80976447	80976597	chr9	80976369	80976502	NM_021154	29968	64481	PSAT1	phosphoserine aminotransferase 1	protein-coding	YES
chr9	122845268	122845418	chr9	122845389	122845635	NR_132393	106146149	148005	LINC01613	long intergenic non-protein coding RNA 1613	ncRNA	NO
chr9	122845599	122845749	chr9	122845389	122845635	NR_132393	106146149	148336	LINC01613	long intergenic non-protein coding RNA 1613	ncRNA	NO
chr9	128754560	128754710	chr9	128754657	128754813	NM_006195	5090	244173	PBX3	PBX homeobox 3	protein-coding	NO

## Sheet: GM12878
chr	start	end	HAR.chr	HAR.start	HAR.end	Nearest.Refseq.Gene	Entrez.ID	Nearest.TSS	Gene.Symbol	Gene.Description	Gene.Type	Contacts?
chr6	163148292	163149201	chr6	163149057	163149162	NM_004562	5071	51	PRKN	parkin RBR E3 ubiquitin protein ligase	protein-coding	NO
chr12	78240707	78241096	chr12	78240800	78241080	NM_014903	89795	16228	NAV3	neuron navigator 3	protein-coding	NO
chr2	6485626	6486360	chr2	6485395	6485718	NR_110251	101929390	29561	LINC01247	long intergenic non-protein coding RNA 1247	ncRNA	NO
chr9	469653	470690	chr9	469645	470020	NM_015158	23189	-119	KANK1	KN motif and ankyrin repeat domains 1	protein-coding	NO
chr5	92413615	92414772	chr5	92413618	92413987	NR_015369	441094	492855	NR2F1-AS1	NR2F1 antisense RNA 1	ncRNA	NO
chr8	50968849	50969467	chr8	50969280	50969870	NM_018967	54212	-107533	SNTG1	syntrophin gamma 1	protein-coding	NO
chr2	114647019	114647989	chr2	114647840	114648480	NM_005721	10096	-7	ACTR3	actin related protein 3	protein-coding	NO
chr18	72509049	72509827	chr18	72508477	72509506	NM_017757	55628	166519	ZNF407	zinc finger protein 407	protein-coding	NO
chr11	124615791	124617105	chr11	124616780	124617190	NM_014312	23584	5703	VSIG2	V-set and immunoglobulin domain containing 2	protein-coding	NO
chr12	12735692	12736374	chr12	12735910	12736239	NM_030640	80824	-20236	DUSP16	dual specificity phosphatase 16	protein-coding	NO
chr4	81461916	81462487	chr4	81462392	81462551	NM_152770	255119	205328	CFAP299	cilia and flagella associated protein 299	protein-coding	NO
chr3	107317719	107318534	chr3	107317832	107318292	NM_020235	56987	76318	BBX	BBX high mobility group box domain containing	protein-coding	NO
chr1	101491032	101491781	chr1	101490800	101491270	NR_109849	102606465	5	LOC102606465	uncharacterized LOC102606465	ncRNA	NO
chr1	79658768	79659416	chr1	79659180	79659440	NM_022159	64123	-186677	ADGRL4	adhesion G protein-coupled receptor L4	protein-coding	NO
chr6	70979989	70980667	chr6	70980385	70980615	NM_001851	1297	12572	COL9A1	collagen type IX alpha 1 chain	protein-coding	NO
chr18	72581768	72582753	chr18	72582237	72582342	NM_017757	55628	239342	ZNF407	zinc finger protein 407	protein-coding	NO
chr21	15825663	15826069	chr21	15825740	15825930	NM_006948	6782	-70399	HSPA13	heat shock protein family A (Hsp70) member 13	protein-coding	NO
chr8	10981349	10981987	chr8	10981620	10981970	NR_134308	101929269	-57069	LOC101929269	uncharacterized LOC101929269	ncRNA	NO
chr9	272326	273186	chr9	272805	273130	NM_203447	81704	-290	DOCK8	dedicator of cytokinesis 8	protein-coding	YES
chr1	82064244	82064785	chr1	82064452	82064819	NR_125943	101927434	-41128	LOC101927434	uncharacterized LOC101927434	ncRNA	NO
chr9	82226068	82226612	chr9	82225960	82226320	NM_007005	7091	38248	TLE4	TLE family member 4- transcriptional corepressor	protein-coding	YES
chr4	13785502	13786200	chr4	13785680	13785863	NR_121681	101929071	129048	LINC01182	long intergenic non-protein coding RNA 1182	ncRNA	NO
chr1	149576698	149577964	chr1	149576471	149576706	NR_024510	728855	864	LINC00623	long intergenic non-protein coding RNA 623	ncRNA	NO
chr1	45097288	45098550	chr1	45097595	45097759	NR_145816	109623472	38809	SNORD145	small nucleolar RNA- C/D box 145	snoRNA	NO
chr6	710818	711665	chr6	710676	710853	NM_018303	55770	-18101	EXOC2	exocyst complex component 2	protein-coding	YES
chr4	154408694	154409932	chr4	154408995	154409108	NM_015196	23240	21801	TMEM131L	transmembrane 131 like	protein-coding	NO
chr2	172430608	172430957	chr2	172430319	172430657	NM_024843	79901	51799	CYBRD1	cytochrome b reductase 1	protein-coding	NO
chr5	13957233	13957533	chr5	13957142	13957257	NM_001369	1767	-12794	DNAH5	dynein axonemal heavy chain 5	protein-coding	YES
chr15	90944090	90944452	chr15	90943200	90947150	NM_003870	8826	12797	IQGAP1	IQ motif containing GTPase activating protein 1	protein-coding	NO

## Sheet: Zero-Hurdle Modelling
HUMAN Sequence Diversity
Model	Comparison	t.ratio	P-value	Direction (wrt first in pair)
Zero-hurdle
	FETAL-BIASED - OLD-BIASED	-0.214936	0.996495	lower
	FETAL-BIASED - ADULT-BIASED	-0.314467	0.989236	lower
	FETAL-BIASED - YOUNG-BIASED	0.519335	0.95448	higher
	OLD-BIASED - ADULT-BIASED	-0.0319972	0.999988	lower
	OLD-BIASED - YOUNG-BIASED	0.664608	0.910392	higher
	ADULT-BIASED - YOUNG-BIASED	0.790852	0.85865	higher
Counts
	FETAL-BIASED - OLD-BIASED	-20.8359	0	lower
	FETAL-BIASED - ADULT-BIASED	-25.1717	0	lower
	FETAL-BIASED - YOUNG-BIASED	0.971639	0.765625	higher
	OLD-BIASED - ADULT-BIASED	3.49809	0.00264067	higher
	OLD-BIASED - YOUNG-BIASED	18.5636	0	higher
	ADULT-BIASED - YOUNG-BIASED	20.0366	0	higher
CHIMPANZEE Sequence Diversity
Model	Comparison	t.ratio	P-value	Direction (wrt first in pair)
Zero-hurdle
	FETAL-BIASED - OLD-BIASED	11.2354	7.99361e-15	higher
	FETAL-BIASED - ADULT-BIASED	10.6349	3.95239e-14	higher
	FETAL-BIASED - YOUNG-BIASED	5.33404	5.74562e-07	higher
	OLD-BIASED - ADULT-BIASED	-3.49082	0.00271185	lower
	OLD-BIASED - YOUNG-BIASED	-3.78419	0.000887383	lower
	ADULT-BIASED - YOUNG-BIASED	-1.76041	0.292614	lower
Counts
	FETAL-BIASED - OLD-BIASED	-40.6479	0	lower
	FETAL-BIASED - ADULT-BIASED	-51.6776	0	lower
	FETAL-BIASED - YOUNG-BIASED	-4.47733	4.47102e-05	lower
	OLD-BIASED - ADULT-BIASED	6.46332	6.14424e-10	higher
	OLD-BIASED - YOUNG-BIASED	31.0717	0	higher
	ADULT-BIASED - YOUNG-BIASED	33.433	0	higher
GORILLA Sequence Diversity
Model	Comparison	t.ratio	P-value	Direction (wrt first in pair)
Zero-hurdle
	FETAL-BIASED - OLD-BIASED	12.604	0	higher
	FETAL-BIASED - ADULT-BIASED	12.002	0	higher
	FETAL-BIASED - YOUNG-BIASED	3.45246	0.00311762	higher
	OLD-BIASED - ADULT-BIASED	-3.75389	0.00100001	lower
	OLD-BIASED - YOUNG-BIASED	-6.21854	3.00936e-09	lower
	ADULT-BIASED - YOUNG-BIASED	-4.44816	5.11976e-05	lower
Counts
	FETAL-BIASED - OLD-BIASED	-48.097	0	lower
	FETAL-BIASED - ADULT-BIASED	-60.3203	0	lower
	FETAL-BIASED - YOUNG-BIASED	1.30017	0.562784	higher
	OLD-BIASED - ADULT-BIASED	8.66032	3.37508e-14	higher
	OLD-BIASED - YOUNG-BIASED	42.4104	0	higher
	ADULT-BIASED - YOUNG-BIASED	46.3207	0	higher

[truncated: 2 more sheets: Intra-species (Human) Diversity, Intra-species (Chimp) Diversity]
