# Supplementary material for: Shifting epigenetic contexts influence regulatory variation and disease risk
Source: Aging (Albany NY). 2021 Jun 16;13(12):15699–749. doi: 10.18632/aging.203194 (PMC8266365; doi:10.18632/aging.203194)
Supplement: Supplementary Table 4 [file aging-13-203194-s006.xls]

## Sheet: UKB Summary Stat Files
Supplementary Table 4. Disease Associations.
Broad Category	ICD10 Code	description	gwas_dropbox
NEOPLASM	C01	Diagnoses - main ICD10: C01 Malignant neoplasm of base of tongue	https://www.dropbox.com/s/x6uezrlwkhseku8/C01.gwas.imputed_v3.both_sexes.tsv.bgz?dl=0
NEOPLASM	C02	Diagnoses - main ICD10: C02 Malignant neoplasm of other and unspecified parts of tongue	https://www.dropbox.com/s/uert2uyz3h2eleg/C02.gwas.imputed_v3.both_sexes.tsv.bgz?dl=0
NEOPLASM	C09	Diagnoses - main ICD10: C09 Malignant neoplasm of tonsil	https://www.dropbox.com/s/92zxxvkxpacw77a/C09.gwas.imputed_v3.both_sexes.tsv.bgz?dl=0
NEOPLASM	C15	Diagnoses - main ICD10: C15 Malignant neoplasm of oesophagus	https://www.dropbox.com/s/uocxwegublo98dd/C15.gwas.imputed_v3.both_sexes.tsv.bgz?dl=0
NEOPLASM	C18	Diagnoses - main ICD10: C18 Malignant neoplasm of colon	https://www.dropbox.com/s/hf76dddcoabbzst/C18.gwas.imputed_v3.both_sexes.tsv.bgz?dl=0
NEOPLASM	C20	Diagnoses - main ICD10: C20 Malignant neoplasm of rectum	https://www.dropbox.com/s/wdut0i5yl2nnvha/C20.gwas.imputed_v3.both_sexes.tsv.bgz?dl=0
NEOPLASM	C22	Diagnoses - main ICD10: C22 Malignant neoplasm of liver and intrahepatic bile ducts	https://www.dropbox.com/s/f5tq6q4txfjixiu/C22.gwas.imputed_v3.both_sexes.tsv.bgz?dl=0
NEOPLASM	C25	Diagnoses - main ICD10: C25 Malignant neoplasm of pancreas	https://www.dropbox.com/s/ladm0rq56hr3wvu/C25.gwas.imputed_v3.both_sexes.tsv.bgz?dl=0
NEOPLASM	C34	Diagnoses - main ICD10: C34 Malignant neoplasm of bronchus and lung	https://www.dropbox.com/s/q5ux8kt1ock9qdm/C34.gwas.imputed_v3.both_sexes.tsv.bgz?dl=0
NEOPLASM	C43	Diagnoses - main ICD10: C43 Malignant melanoma of skin	https://www.dropbox.com/s/ouxobe9wdmzekmc/C43.gwas.imputed_v3.both_sexes.tsv.bgz?dl=0
NEOPLASM	C44	Diagnoses - main ICD10: C44 Other malignant neoplasms of skin	https://www.dropbox.com/s/x0vom4ikvh6rka1/C44.gwas.imputed_v3.both_sexes.tsv.bgz?dl=0
NEOPLASM	C45	Diagnoses - main ICD10: C45 Mesothelioma	https://www.dropbox.com/s/zfi7cfi5pikr4un/C45.gwas.imputed_v3.both_sexes.tsv.bgz?dl=0
NEOPLASM	C48	Diagnoses - main ICD10: C48 Malignant neoplasm of retroperitoneum and peritoneum	https://www.dropbox.com/s/kg55uomp5245rc2/C48.gwas.imputed_v3.both_sexes.tsv.bgz?dl=0
NEOPLASM	C49	Diagnoses - main ICD10: C49 Malignant neoplasm of other connective and soft tissue	https://www.dropbox.com/s/ehufsyfe6pqk3cu/C49.gwas.imputed_v3.both_sexes.tsv.bgz?dl=0
NEOPLASM	C50	Diagnoses - main ICD10: C50 Malignant neoplasm of breast	https://www.dropbox.com/s/9ws0r86mgv8sn4r/C50.gwas.imputed_v3.both_sexes.tsv.bgz?dl=0
NEOPLASM	C64	Diagnoses - main ICD10: C64 Malignant neoplasm of kidney, except renal pelvis	https://www.dropbox.com/s/ktvbeu9027kyiw0/C64.gwas.imputed_v3.both_sexes.tsv.bgz?dl=0
NEOPLASM	C67	Diagnoses - main ICD10: C67 Malignant neoplasm of bladder	https://www.dropbox.com/s/3zcgacq7cfrek7r/C67.gwas.imputed_v3.both_sexes.tsv.bgz?dl=0
NEOPLASM	C69	Diagnoses - main ICD10: C69 Malignant neoplasm of eye and adnexa	https://www.dropbox.com/s/6l2nzwnkn2j708e/C69.gwas.imputed_v3.both_sexes.tsv.bgz?dl=0
NEOPLASM	C71	Diagnoses - main ICD10: C71 Malignant neoplasm of brain	https://www.dropbox.com/s/1h6l7y2yaik215o/C71.gwas.imputed_v3.both_sexes.tsv.bgz?dl=0
NEOPLASM	C73	Diagnoses - main ICD10: C73 Malignant neoplasm of thyroid gland	https://www.dropbox.com/s/jrcqqrlipwjx3h8/C73.gwas.imputed_v3.both_sexes.tsv.bgz?dl=0
NEOPLASM	C77	Diagnoses - main ICD10: C77 Secondary and unspecified malignant neoplasm of lymph nodes	https://www.dropbox.com/s/7u07yhhyr6yje3k/C77.gwas.imputed_v3.both_sexes.tsv.bgz?dl=0
NEOPLASM	C80	Diagnoses - main ICD10: C80 Malignant neoplasm without specification of site	https://www.dropbox.com/s/7yok92ymcoz7fhu/C80.gwas.imputed_v3.both_sexes.tsv.bgz?dl=0
NEOPLASM	C81	Diagnoses - main ICD10: C81 Hodgkin's disease	https://www.dropbox.com/s/5psx519kpfahk6p/C81.gwas.imputed_v3.both_sexes.tsv.bgz?dl=0
NEOPLASM	C82	Diagnoses - main ICD10: C82 Follicular [nodular] non-Hodgkin's lymphoma	https://www.dropbox.com/s/a479x0tqxg7znpx/C82.gwas.imputed_v3.both_sexes.tsv.bgz?dl=0
NEOPLASM	C83	Diagnoses - main ICD10: C83 Diffuse non-Hodgkin's lymphoma	https://www.dropbox.com/s/rmysivs558ur9v3/C83.gwas.imputed_v3.both_sexes.tsv.bgz?dl=0
NEOPLASM	D04	Diagnoses - main ICD10: D04 Carcinoma in situ of skin	https://www.dropbox.com/s/him74cqjyx1ea0i/D04.gwas.imputed_v3.both_sexes.tsv.bgz?dl=0
NEOPLASM	D05	Diagnoses - main ICD10: D05 Carcinoma in situ of breast	https://www.dropbox.com/s/b097szma9z1a4af/D05.gwas.imputed_v3.both_sexes.tsv.bgz?dl=0
NEOPLASM	D07	Diagnoses - main ICD10: D07 Carcinoma in situ of other and unspecified genital organs	https://www.dropbox.com/s/qlubk9flrv1eo1t/D07.gwas.imputed_v3.both_sexes.tsv.bgz?dl=0
NEOPLASM	D09	Diagnoses - main ICD10: D09 Carcinoma in situ of other and unspecified sites	https://www.dropbox.com/s/nx2grb9dwyecbqm/D09.gwas.imputed_v3.both_sexes.tsv.bgz?dl=0
NEOPLASM	D11	Diagnoses - main ICD10: D11 Benign neoplasm of major salivary glands	https://www.dropbox.com/s/6ggf0d3yrzv07dx/D11.gwas.imputed_v3.both_sexes.tsv.bgz?dl=0
NEOPLASM	D12	Diagnoses - main ICD10: D12 Benign neoplasm of colon, rectum, anus and anal canal	https://www.dropbox.com/s/bm6r1wxbqvohbnz/D12.gwas.imputed_v3.both_sexes.tsv.bgz?dl=0
NEOPLASM	D13	Diagnoses - main ICD10: D13 Benign neoplasm of other and ill-defined parts of digestive system	https://www.dropbox.com/s/ow2um2ahje47q91/D13.gwas.imputed_v3.both_sexes.tsv.bgz?dl=0
NEOPLASM	D14	Diagnoses - main ICD10: D14 Benign neoplasm of middle ear and respiratory system	https://www.dropbox.com/s/07eokxpmohfp7cw/D14.gwas.imputed_v3.both_sexes.tsv.bgz?dl=0
NEOPLASM	D16	Diagnoses - main ICD10: D16 Benign neoplasm of bone and articular cartilage	https://www.dropbox.com/s/radbbkpowmg2k4e/D16.gwas.imputed_v3.both_sexes.tsv.bgz?dl=0
NEOPLASM	D17	Diagnoses - main ICD10: D17 Benign lipomatous neoplasm	https://www.dropbox.com/s/w31fxiih129ddpn/D17.gwas.imputed_v3.both_sexes.tsv.bgz?dl=0
NEOPLASM	D18	Diagnoses - main ICD10: D18 Haemangioma and lymphangioma, any site	https://www.dropbox.com/s/4yhy7mnd29kkbdl/D18.gwas.imputed_v3.both_sexes.tsv.bgz?dl=0
NEOPLASM	D21	Diagnoses - main ICD10: D21 Other benign neoplasms of connective and other soft tissue	https://www.dropbox.com/s/hrfoz4ekw93jbtm/D21.gwas.imputed_v3.both_sexes.tsv.bgz?dl=0
NEOPLASM	D22	Diagnoses - main ICD10: D22 Melanocytic naevi	https://www.dropbox.com/s/ryx2muopmoafm2w/D22.gwas.imputed_v3.both_sexes.tsv.bgz?dl=0
NEOPLASM	D23	Diagnoses - main ICD10: D23 Other benign neoplasms of skin	https://www.dropbox.com/s/h18bt4oj81jcsyc/D23.gwas.imputed_v3.both_sexes.tsv.bgz?dl=0
NEOPLASM	D24	Diagnoses - main ICD10: D24 Benign neoplasm of breast	https://www.dropbox.com/s/0viogpvanhxnlnk/D24.gwas.imputed_v3.both_sexes.tsv.bgz?dl=0
NEOPLASM	D35	Diagnoses - main ICD10: D35 Benign neoplasm of other and unspecified endocrine glands	https://www.dropbox.com/s/ce9ebycn05jnwdt/D35.gwas.imputed_v3.both_sexes.tsv.bgz?dl=0
NEOPLASM	D37	Diagnoses - main ICD10: D37 Neoplasm of uncertain or unknown behaviour of oral cavity and digestive organs	https://www.dropbox.com/s/xtir3l3nrlcke2x/D37.gwas.imputed_v3.both_sexes.tsv.bgz?dl=0
NEOPLASM	D38	Diagnoses - main ICD10: D38 Neoplasm of uncertain or unknown behaviour of middle ear and respiratory and intrathoracic organs	https://www.dropbox.com/s/9c7j0aoxkbgnw6j/D38.gwas.imputed_v3.both_sexes.tsv.bgz?dl=0
NEOPLASM	D41	Diagnoses - main ICD10: D41 Neoplasm of uncertain or unknown behaviour of urinary organs	https://www.dropbox.com/s/cqhf02bw809qr35/D41.gwas.imputed_v3.both_sexes.tsv.bgz?dl=0
NEOPLASM	D43	Diagnoses - main ICD10: D43 Neoplasm of uncertain or unknown behaviour of brain and central nervous system	https://www.dropbox.com/s/04z5xjp6t79zukb/D43.gwas.imputed_v3.both_sexes.tsv.bgz?dl=0
NEOPLASM	D45	Diagnoses - main ICD10: D45 Polycythaemia vera	https://www.dropbox.com/s/cheyc5kkaqfl1ki/D45.gwas.imputed_v3.both_sexes.tsv.bgz?dl=0
NEOPLASM	D46	Diagnoses - main ICD10: D46 Myelodysplastic syndromes	https://www.dropbox.com/s/m1s598rat469zsf/D46.gwas.imputed_v3.both_sexes.tsv.bgz?dl=0
NEOPLASM	D48	Diagnoses - main ICD10: D48 Neoplasm of uncertain or unknown behaviour of other and unspecified sites	https://www.dropbox.com/s/ht4c2vm5fqko09j/D48.gwas.imputed_v3.both_sexes.tsv.bgz?dl=0
BLOOD	D63	Diagnoses - main ICD10: D63 Anaemia in chronic diseases classified elsewhere	https://www.dropbox.com/s/1otrczdxs039ogl/D63.gwas.imputed_v3.both_sexes.tsv.bgz?dl=0
BLOOD	D64	Diagnoses - main ICD10: D64 Other anaemias	https://www.dropbox.com/s/l2aymlgvczmi21u/D64.gwas.imputed_v3.both_sexes.tsv.bgz?dl=0
METABOLIC	E03	Diagnoses - main ICD10: E03 Other hypothyroidism	https://www.dropbox.com/s/gnwjnqdiw32n7kh/E03.gwas.imputed_v3.both_sexes.tsv.bgz?dl=0
DIABETES	E10	Diagnoses - main ICD10: E10 Insulin-dependent diabetes mellitus	https://www.dropbox.com/s/yzhl5nnnhwn4tyz/E10.gwas.imputed_v3.both_sexes.tsv.bgz?dl=0
DIABETES	E11	Diagnoses - main ICD10: E11 Non-insulin-dependent diabetes mellitus	https://www.dropbox.com/s/ugskg6i1oudve5i/E11.gwas.imputed_v3.both_sexes.tsv.bgz?dl=0
METABOLIC	E23	Diagnoses - main ICD10: E23 Hypofunction and other disorders of pituitary gland	https://www.dropbox.com/s/x1ooh3rj02xrz9o/E23.gwas.imputed_v3.both_sexes.tsv.bgz?dl=0
METABOLIC	E83	Diagnoses - main ICD10: E83 Disorders of mineral metabolism	https://www.dropbox.com/s/xe5ha1qm8vtd2u3/E83.gwas.imputed_v3.both_sexes.tsv.bgz?dl=0
METABOLIC	E87	Diagnoses - main ICD10: E87 Other disorders of fluid, electrolyte and acid-base balance	https://www.dropbox.com/s/yu42y8fcb1kvf0d/E87.gwas.imputed_v3.both_sexes.tsv.bgz?dl=0
CV	I08	Diagnoses - main ICD10: I08 Multiple valve diseases	https://www.dropbox.com/s/z94j84ygyyefj0u/I08.gwas.imputed_v3.both_sexes.tsv.bgz?dl=0
CV	I10	Diagnoses - main ICD10: I10 Essential (primary) hypertension	https://www.dropbox.com/s/m9hxsj2k5pyxjfw/I10.gwas.imputed_v3.both_sexes.tsv.bgz?dl=0
CV	I12	Diagnoses - main ICD10: I12 Hypertensive renal disease	https://www.dropbox.com/s/2n035mt0a0eceu6/I12.gwas.imputed_v3.both_sexes.tsv.bgz?dl=0
CV	I20	Diagnoses - main ICD10: I20 Angina pectoris	https://www.dropbox.com/s/1kwz4qez23mz4ho/I20.gwas.imputed_v3.both_sexes.tsv.bgz?dl=0
CV	I21	Diagnoses - main ICD10: I21 Acute myocardial infarction	https://www.dropbox.com/s/8tk8m53ia0lyhs7/I21.gwas.imputed_v3.both_sexes.tsv.bgz?dl=0
CV	I22	Diagnoses - main ICD10: I22 Subsequent myocardial infarction	https://www.dropbox.com/s/5xwsu138dj9wo1i/I22.gwas.imputed_v3.both_sexes.tsv.bgz?dl=0
CV	I24	Diagnoses - main ICD10: I24 Other acute ischaemic heart diseases	https://www.dropbox.com/s/k3cpkippv5pqd6t/I24.gwas.imputed_v3.both_sexes.tsv.bgz?dl=0
CV	I25	Diagnoses - main ICD10: I25 Chronic ischaemic heart disease	https://www.dropbox.com/s/62kcfsxrsi0slb8/I25.gwas.imputed_v3.both_sexes.tsv.bgz?dl=0
CV	I26	Diagnoses - main ICD10: I26 Pulmonary embolism	https://www.dropbox.com/s/y103kgpw5avw8s1/I26.gwas.imputed_v3.both_sexes.tsv.bgz?dl=0
CV	I27	Diagnoses - main ICD10: I27 Other pulmonary heart diseases	https://www.dropbox.com/s/m1dmgq8fh2nonhb/I27.gwas.imputed_v3.both_sexes.tsv.bgz?dl=0
CV	I30	Diagnoses - main ICD10: I30 Acute pericarditis	https://www.dropbox.com/s/22lri2nbch57n58/I30.gwas.imputed_v3.both_sexes.tsv.bgz?dl=0
CV	I31	Diagnoses - main ICD10: I31 Other diseases of pericardium	https://www.dropbox.com/s/mw9s4b50liifddd/I31.gwas.imputed_v3.both_sexes.tsv.bgz?dl=0
CV	I33	Diagnoses - main ICD10: I33 Acute and subacute endocarditis	https://www.dropbox.com/s/xxrrvnl8opsx43d/I33.gwas.imputed_v3.both_sexes.tsv.bgz?dl=0
CV	I34	Diagnoses - main ICD10: I34 Nonrheumatic mitral valve disorders	https://www.dropbox.com/s/m2bgypwyp89zkxq/I34.gwas.imputed_v3.both_sexes.tsv.bgz?dl=0
CV	I35	Diagnoses - main ICD10: I35 Nonrheumatic aortic valve disorders	https://www.dropbox.com/s/xrdj7c9kyk01fkb/I35.gwas.imputed_v3.both_sexes.tsv.bgz?dl=0
CV	I42	Diagnoses - main ICD10: I42 Cardiomyopathy	https://www.dropbox.com/s/x164s4tlb4vjffe/I42.gwas.imputed_v3.both_sexes.tsv.bgz?dl=0
CV	I44	Diagnoses - main ICD10: I44 Atrioventricular and left bundle-branch block	https://www.dropbox.com/s/2w21t42v9hgnmsf/I44.gwas.imputed_v3.both_sexes.tsv.bgz?dl=0
CV	I46	Diagnoses - main ICD10: I46 Cardiac arrest	https://www.dropbox.com/s/oxfxj0xxi9mi52o/I46.gwas.imputed_v3.both_sexes.tsv.bgz?dl=0
CV	I47	Diagnoses - main ICD10: I47 Paroxysmal tachycardia	https://www.dropbox.com/s/gtgfepx91wlz497/I47.gwas.imputed_v3.both_sexes.tsv.bgz?dl=0
CV	I48	Diagnoses - main ICD10: I48 Atrial fibrillation and flutter	https://www.dropbox.com/s/uluig1qhvz7veek/I48.gwas.imputed_v3.both_sexes.tsv.bgz?dl=0
CV	I50	Diagnoses - main ICD10: I50 Heart failure	https://www.dropbox.com/s/ruhz8ihfqviok49/I50.gwas.imputed_v3.both_sexes.tsv.bgz?dl=0
CV	I51	Diagnoses - main ICD10: I51 Complications and ill-defined descriptions of heart disease	https://www.dropbox.com/s/u3ge0zwbe8fhe48/I51.gwas.imputed_v3.both_sexes.tsv.bgz?dl=0
CV	I61	Diagnoses - main ICD10: I61 Intracerebral haemorrhage	https://www.dropbox.com/s/fqjf34x3k5mrsy1/I61.gwas.imputed_v3.both_sexes.tsv.bgz?dl=0
CV	I63	Diagnoses - main ICD10: I63 Cerebral infarction	https://www.dropbox.com/s/az8jk5wimdl5a76/I63.gwas.imputed_v3.both_sexes.tsv.bgz?dl=0
CV	I64	Diagnoses - main ICD10: I64 Stroke, not specified as haemorrhage or infarction	https://www.dropbox.com/s/ra0a37einw63ldf/I64.gwas.imputed_v3.both_sexes.tsv.bgz?dl=0
CV	I65	Diagnoses - main ICD10: I65 Occlusion and stenosis of precerebral arteries, not resulting in cerebral infarction	https://www.dropbox.com/s/vek3n470hhqrzj1/I65.gwas.imputed_v3.both_sexes.tsv.bgz?dl=0
CV	I70	Diagnoses - main ICD10: I70 Atherosclerosis	https://www.dropbox.com/s/4tqxtz02raoscwc/I70.gwas.imputed_v3.both_sexes.tsv.bgz?dl=0
CV	I71	Diagnoses - main ICD10: I71 Aortic aneurysm and dissection	https://www.dropbox.com/s/9back0r05qe2gnw/I71.gwas.imputed_v3.both_sexes.tsv.bgz?dl=0
CV	I73	Diagnoses - main ICD10: I73 Other peripheral vascular diseases	https://www.dropbox.com/s/ypt88jof4mg111j/I73.gwas.imputed_v3.both_sexes.tsv.bgz?dl=0
CV	I74	Diagnoses - main ICD10: I74 Arterial embolism and thrombosis	https://www.dropbox.com/s/u9l0bkdzz67pmfk/I74.gwas.imputed_v3.both_sexes.tsv.bgz?dl=0
CV	I78	Diagnoses - main ICD10: I78 Diseases of capillaries	https://www.dropbox.com/s/k4kstfzlmrct3wz/I78.gwas.imputed_v3.both_sexes.tsv.bgz?dl=0
CV	I80	Diagnoses - main ICD10: I80 Phlebitis and thrombophlebitis	https://www.dropbox.com/s/3dpobrivnshwpx4/I80.gwas.imputed_v3.both_sexes.tsv.bgz?dl=0
CV	I82	Diagnoses - main ICD10: I82 Other venous embolism and thrombosis	https://www.dropbox.com/s/acrmcsi51iuyexw/I82.gwas.imputed_v3.both_sexes.tsv.bgz?dl=0
CV	I83	Diagnoses - main ICD10: I83 Varicose veins of lower extremities	https://www.dropbox.com/s/2tvm6rtktpg1gc7/I83.gwas.imputed_v3.both_sexes.tsv.bgz?dl=0
CV	I84	Diagnoses - main ICD10: I84 Haemorrhoids	https://www.dropbox.com/s/i45hsvufmes3mfh/I84.gwas.imputed_v3.both_sexes.tsv.bgz?dl=0
CV	I85	Diagnoses - main ICD10: I85 Oesophageal varices	https://www.dropbox.com/s/4588jysgn48eq1j/I85.gwas.imputed_v3.both_sexes.tsv.bgz?dl=0
CV	I86	Diagnoses - main ICD10: I86 Varicose veins of other sites	https://www.dropbox.com/s/qrwo6x4f2y74h8w/I86.gwas.imputed_v3.both_sexes.tsv.bgz?dl=0
CV	I95	Diagnoses - main ICD10: I95 Hypotension	https://www.dropbox.com/s/l6mop0r20vgmkyc/I95.gwas.imputed_v3.both_sexes.tsv.bgz?dl=0
RESPIRATORY	J20	Diagnoses - main ICD10: J20 Acute bronchitis	https://www.dropbox.com/s/izq83jocvkvc7sq/J20.gwas.imputed_v3.both_sexes.tsv.bgz?dl=0
RESPIRATORY	J22	Diagnoses - main ICD10: J22 Unspecified acute lower respiratory infection	https://www.dropbox.com/s/9s599u04mmfxu9h/J22.gwas.imputed_v3.both_sexes.tsv.bgz?dl=0
RESPIRATORY	J40	Diagnoses - main ICD10: J40 Bronchitis, not specified as acute or chronic	https://www.dropbox.com/s/5njtic3kebvlt9q/J40.gwas.imputed_v3.both_sexes.tsv.bgz?dl=0
RESPIRATORY	J44	Diagnoses - main ICD10: J44 Other chronic obstructive pulmonary disease	https://www.dropbox.com/s/3rew23t30emmv8b/J44.gwas.imputed_v3.both_sexes.tsv.bgz?dl=0
RESPIRATORY	J47	Diagnoses - main ICD10: J47 Bronchiectasis	https://www.dropbox.com/s/t8cwz0lk4tixb3x/J47.gwas.imputed_v3.both_sexes.tsv.bgz?dl=0
RESPIRATORY	J84	Diagnoses - main ICD10: J84 Other interstitial pulmonary diseases	https://www.dropbox.com/s/kz8sn803afje98o/J84.gwas.imputed_v3.both_sexes.tsv.bgz?dl=0
DIGESTIVE	K25	Diagnoses - main ICD10: K25 Gastric ulcer	https://www.dropbox.com/s/g8frbf9970a0mx5/K25.gwas.imputed_v3.both_sexes.tsv.bgz?dl=0
DIGESTIVE	K26	Diagnoses - main ICD10: K26 Duodenal ulcer	https://www.dropbox.com/s/6xxymem0j2i1uau/K26.gwas.imputed_v3.both_sexes.tsv.bgz?dl=0
DIGESTIVE	K29	Diagnoses - main ICD10: K29 Gastritis and duodenitis	https://www.dropbox.com/s/xstcpf92oevsgwa/K29.gwas.imputed_v3.both_sexes.tsv.bgz?dl=0
DIGESTIVE	K76	Diagnoses - main ICD10: K76 Other diseases of liver	https://www.dropbox.com/s/m7asy255baaoqbk/K76.gwas.imputed_v3.both_sexes.tsv.bgz?dl=0
DIGESTIVE	K85	Diagnoses - main ICD10: K85 Acute pancreatitis	https://www.dropbox.com/s/nap6s5mr3u24k35/K85.gwas.imputed_v3.both_sexes.tsv.bgz?dl=0
MUSCULOSKELETAL	M00	Diagnoses - main ICD10: M00 Pyogenic arthritis	https://www.dropbox.com/s/lchjttd55rr2won/M00.gwas.imputed_v3.both_sexes.tsv.bgz?dl=0
MUSCULOSKELETAL	M05	Diagnoses - main ICD10: M05 Seropositive rheumatoid arthritis	https://www.dropbox.com/s/dh4bi6te3brqtkh/M05.gwas.imputed_v3.both_sexes.tsv.bgz?dl=0
MUSCULOSKELETAL	M06	Diagnoses - main ICD10: M06 Other rheumatoid arthritis	https://www.dropbox.com/s/nhfn3uemqiy3svl/M06.gwas.imputed_v3.both_sexes.tsv.bgz?dl=0
MUSCULOSKELETAL	M10	Diagnoses - main ICD10: M10 Gout	https://www.dropbox.com/s/7l26kh3kfduu7gh/M10.gwas.imputed_v3.both_sexes.tsv.bgz?dl=0
MUSCULOSKELETAL	M13	Diagnoses - main ICD10: M13 Other arthritis	https://www.dropbox.com/s/e1s9ff2d8toh5c4/M13.gwas.imputed_v3.both_sexes.tsv.bgz?dl=0
MUSCULOSKELETAL	M13	Diagnoses - main ICD10: M13 Other arthritis	https://www.dropbox.com/s/e1s9ff2d8toh5c4/M13.gwas.imputed_v3.both_sexes.tsv.bgz?dl=0
MUSCULOSKELETAL	M15	Diagnoses - main ICD10: M15 Polyarthrosis	https://www.dropbox.com/s/9hmqby1yrn5sob9/M15.gwas.imputed_v3.both_sexes.tsv.bgz?dl=0
MUSCULOSKELETAL	M16	Diagnoses - main ICD10: M16 Coxarthrosis [arthrosis of hip]	https://www.dropbox.com/s/lls1kahhyz5pyz7/M16.gwas.imputed_v3.both_sexes.tsv.bgz?dl=0
MUSCULOSKELETAL	M17	Diagnoses - main ICD10: M17 Gonarthrosis [arthrosis of knee]	https://www.dropbox.com/s/e97gk2c7a6grze4/M17.gwas.imputed_v3.both_sexes.tsv.bgz?dl=0
MUSCULOSKELETAL	M18	Diagnoses - main ICD10: M18 Arthrosis of first carpometacarpal joint	https://www.dropbox.com/s/xljouf0tx9dvvh8/M18.gwas.imputed_v3.both_sexes.tsv.bgz?dl=0
MUSCULOSKELETAL	M19	Diagnoses - main ICD10: M19 Other arthrosis	https://www.dropbox.com/s/2n3hk7gajs7aefg/M19.gwas.imputed_v3.both_sexes.tsv.bgz?dl=0
MUSCULOSKELETAL	M45	Diagnoses - main ICD10: M45 Ankylosing spondylitis	https://www.dropbox.com/s/mumyyl07ec2r9ff/M45.gwas.imputed_v3.both_sexes.tsv.bgz?dl=0
MUSCULOSKELETAL	M46	Diagnoses - main ICD10: M46 Other inflammatory spondylopathies	https://www.dropbox.com/s/v2tegdiohogctds/M46.gwas.imputed_v3.both_sexes.tsv.bgz?dl=0
MUSCULOSKELETAL	M47	Diagnoses - main ICD10: M47 Spondylosis	https://www.dropbox.com/s/ho51egxddjiqpf2/M47.gwas.imputed_v3.both_sexes.tsv.bgz?dl=0
MUSCULOSKELETAL	M48	Diagnoses - main ICD10: M48 Other spondylopathies	https://www.dropbox.com/s/8cw18ee50kzwcpl/M48.gwas.imputed_v3.both_sexes.tsv.bgz?dl=0
MUSCULOSKELETAL	M65	Diagnoses - main ICD10: M65 Synovitis and tenosynovitis	https://www.dropbox.com/s/jc1a5z12e2t8vok/M65.gwas.imputed_v3.both_sexes.tsv.bgz?dl=0
MUSCULOSKELETAL	M67	Diagnoses - main ICD10: M67 Other disorders of synovium and tendon	https://www.dropbox.com/s/m6dwylld9p4rlha/M67.gwas.imputed_v3.both_sexes.tsv.bgz?dl=0
MUSCULOSKELETAL	M80	Diagnoses - main ICD10: M80 Osteoporosis with pathological fracture	https://www.dropbox.com/s/aqw9v43b627ob28/M80.gwas.imputed_v3.both_sexes.tsv.bgz?dl=0
MUSCULOSKELETAL	M81	Diagnoses - main ICD10: M81 Osteoporosis without pathological fracture	https://www.dropbox.com/s/q6m21s1olbbs0bw/M81.gwas.imputed_v3.both_sexes.tsv.bgz?dl=0
DIABETES	N17	Diagnoses - main ICD10: N17 Acute renal failure	https://www.dropbox.com/s/ed39zhcmjm5mm7r/N17.gwas.imputed_v3.both_sexes.tsv.bgz?dl=0
DIABETES	N18	Diagnoses - main ICD10: N18 Chronic renal failure	https://www.dropbox.com/s/a22owffzyj6gh5q/N18.gwas.imputed_v3.both_sexes.tsv.bgz?dl=0
DIABETES	N19	Diagnoses - main ICD10: N19 Unspecified renal failure	https://www.dropbox.com/s/ji1alxj5jv7gwu8/N19.gwas.imputed_v3.both_sexes.tsv.bgz?dl=0
DIABETES	N20	Diagnoses - main ICD10: N20 Calculus of kidney and ureter	https://www.dropbox.com/s/o9y0adkj028atfs/N20.gwas.imputed_v3.both_sexes.tsv.bgz?dl=0
DIABETES	N28	Diagnoses - main ICD10: N28 Other disorders of kidney and ureter, not elsewhere classified	https://www.dropbox.com/s/vtlaqoeqe39tt39/N28.gwas.imputed_v3.both_sexes.tsv.bgz?dl=0
Describes the results of analyses exploring the effects of changes to nearby epigenetic context (i.e. local accessibility) on the heritable aging-associated disease risk of human genetic variants, at the genome-wide and per-locus level. Sheet 1 – “UKB Summary Stat Files”: Metadata of UK Biobanks summary-statistic datasets used. Sheet 2 - “SNP Enrichments - DNase Regions”: Enrichment results compa…

## Sheet: SNP Enrichments - DNase Regions
Disease	Significance Thresholded SNPs Nearby	Average Background Counts of Nearby Significance-Thresholded SNPs	SD Background Values	z_score	pval	padj	direction
MUSCULOSKELETAL_M46	1259	1031.23	24.9813	9.11774	3.8354e-20	9.0203e-20	enrichment
MUSCULOSKELETAL_M19	615	443.926	15.8438	10.7975	1.76764e-27	1.4966e-26	enrichment
MUSCULOSKELETAL_M67	736	534.954	17.602	11.4218	1.62743e-30	2.95263e-29	enrichment
MUSCULOSKELETAL_M17	735	601.694	23.2128	5.74278	4.65661e-09	6.03459e-09	enrichment
MUSCULOSKELETAL_M00	1218	993.67	23.6569	9.48265	1.23956e-21	3.83962e-21	enrichment
MUSCULOSKELETAL_M45	3573	3146.3	125.638	3.39627	0.000341556	0.000377197	enrichment
MUSCULOSKELETAL_M16	3213	2398.92	87.4693	9.307	6.57459e-21	1.8555e-20	enrichment
MUSCULOSKELETAL_M18	893	667.963	20.3308	11.0688	8.89303e-29	1.02674e-27	enrichment
MUSCULOSKELETAL_M65	669	498.532	16.758	10.1723	1.31738e-24	7.49434e-24	enrichment
MUSCULOSKELETAL_M48	659	513.008	17.5447	8.32113	4.35649e-17	7.68436e-17	enrichment
MUSCULOSKELETAL_M10	1205	999.683	24.4534	8.39624	2.30494e-17	4.12292e-17	enrichment
MUSCULOSKELETAL_M47	699	562.938	19.6872	6.91117	2.40329e-12	3.67733e-12	enrichment
MUSCULOSKELETAL_M13	745	567.108	18.4077	9.664	2.14388e-22	7.35872e-22	enrichment
MUSCULOSKELETAL_M15	826	577.795	18.3913	13.4958	8.28221e-42	1.05184e-39	enrichment
MUSCULOSKELETAL_M81	705	533.934	17.1767	9.95916	1.14998e-23	4.56398e-23	enrichment
DIGESTIVE_K76	880	738.666	20.5956	6.86234	3.38707e-12	5.12092e-12	enrichment
DIGESTIVE_K29	345	275.903	13.2111	5.23021	8.46594e-08	1.02398e-07	enrichment
DIGESTIVE_K26	843	626.93	24.7851	8.71774	1.4191e-18	2.73069e-18	enrichment
DIGESTIVE_K25	761	588.651	18.254	9.44171	1.83367e-21	5.54467e-21	enrichment
DIGESTIVE_K85	637	492.616	16.2616	8.87884	3.378e-19	7.03288e-19	enrichment
NEOPLASM_C83	871	674.176	19.4691	10.1096	2.50556e-24	1.22387e-23	enrichment
NEOPLASM_D23	594	441.06	15.2972	9.99791	7.78264e-24	3.40826e-23	enrichment
NEOPLASM_D14	1475	1304.94	27.7723	6.12322	4.58522e-10	6.3296e-10	enrichment
NEOPLASM_C50	1292	1044.59	37.9138	6.52556	3.38741e-11	4.88866e-11	enrichment
NEOPLASM_D12	1126	909.576	38.5309	5.61689	9.72107e-09	1.23458e-08	enrichment
NEOPLASM_C34	592	478.374	16.5713	6.85681	3.52075e-12	5.26042e-12	enrichment
NEOPLASM_C67	754	551.74	21.79	9.28225	8.29697e-21	2.29068e-20	enrichment
NEOPLASM_C18	623	515.315	18.6007	5.78928	3.53436e-09	4.67566e-09	enrichment
NEOPLASM_D45	1456	1334.3	36.0471	3.37603	0.000367702	0.00040257	enrichment
NEOPLASM_D09	1903	1710.33	34.0042	5.66616	7.30182e-09	9.36699e-09	enrichment
NEOPLASM_D24	767	574.221	17.8503	10.7997	1.72598e-27	1.4966e-26	enrichment
NEOPLASM_D48	938	748.936	21.3648	8.84931	4.40326e-19	8.87642e-19	enrichment
NEOPLASM_C45	1731	1521.57	31.078	6.73871	7.98973e-12	1.17988e-11	enrichment
NEOPLASM_C01	2241	2172.62	39.8574	1.71559	0.0431183	0.0445206	enrichment
NEOPLASM_C73	1322	1058.3	28.5103	9.24944	1.12835e-20	2.98544e-20	enrichment
NEOPLASM_C81	1675	1511.77	33.6109	4.85655	5.97243e-07	7.08878e-07	enrichment
NEOPLASM_C77	780	589.514	18.7878	10.1388	1.8583e-24	9.83349e-24	enrichment
NEOPLASM_C69	1731	1568.03	29.5831	5.50883	1.80617e-08	2.24886e-08	enrichment
NEOPLASM_C15	827	677.064	19.3443	7.75091	4.56174e-15	7.52392e-15	enrichment
NEOPLASM_D04	994	781.697	21.1215	10.0515	4.52322e-24	2.0516e-23	enrichment
NEOPLASM_C43	1147	865.487	34.4399	8.17405	1.49108e-16	2.55901e-16	enrichment
NEOPLASM_D21	1124	900.892	24.3894	9.14773	2.90722e-20	6.97373e-20	enrichment
NEOPLASM_D37	712	548.158	16.965	9.65765	2.28094e-22	7.62316e-22	enrichment
NEOPLASM_C09	1511	1345.47	28.672	5.77326	3.88767e-09	5.09004e-09	enrichment
NEOPLASM_C49	1527	1238.2	25.6351	11.2657	9.69044e-30	1.38579e-28	enrichment
NEOPLASM_C20	723	542.321	17.6944	10.2111	8.84578e-25	5.34959e-24	enrichment
NEOPLASM_D05	874	662.478	20.5629	10.2866	4.05072e-25	2.5722e-24	enrichment
NEOPLASM_D18	864	628.823	18.3757	12.7983	8.38114e-38	5.32203e-36	enrichment
NEOPLASM_D17	706	513.687	17.0724	11.2645	9.82056e-30	1.38579e-28	enrichment
NEOPLASM_D13	925	682.574	19.3309	12.5408	2.23104e-36	5.66685e-35	enrichment
NEOPLASM_D22	860	722.389	36.8411	3.73526	9.37617e-05	0.000104454	enrichment
NEOPLASM_C71	1209	983.709	22.9674	9.80916	5.141e-23	1.86545e-22	enrichment
NEOPLASM_D41	908	710.002	19.5759	10.1144	2.38504e-24	1.2116e-23	enrichment
NEOPLASM_C80	1140	892.227	22.4216	11.0506	1.08831e-28	1.1518e-27	enrichment
NEOPLASM_D46	1596	1335.63	28.7291	9.06278	6.35809e-20	1.44192e-19	enrichment
NEOPLASM_C64	916	672.66	19.2289	12.6549	5.25428e-37	2.22431e-35	enrichment
NEOPLASM_D07	1096	876.675	22.3319	9.82115	4.56483e-23	1.7051e-22	enrichment
NEOPLASM_C48	1778	1471.59	30.7505	9.96455	1.08932e-23	4.46269e-23	enrichment
NEOPLASM_C02	1636	1505.77	31.4374	4.14242	1.71831e-05	1.98386e-05	enrichment
NEOPLASM_D35	871	666.795	19.482	10.4817	5.24077e-26	3.72137e-25	enrichment
NEOPLASM_D16	1374	1070.84	24.0508	12.6049	9.91722e-37	3.14872e-35	enrichment
NEOPLASM_D38	1980	1834.41	32.9129	4.42337	4.85856e-06	5.66089e-06	enrichment
NEOPLASM_D43	2217	1965.85	34.5321	7.27291	1.75912e-13	2.79261e-13	enrichment
NEOPLASM_D11	1111	869.679	27.262	8.85193	4.30104e-19	8.8102e-19	enrichment
DIABETES_N17	826	639.839	20.6945	8.99566	1.17404e-19	2.61584e-19	enrichment
DIABETES_N19	1546	1371.32	32.6042	5.35747	4.2198e-08	5.15302e-08	enrichment
DIABETES_N28	966	774.136	21.508	8.92057	2.31951e-19	4.99285e-19	enrichment
DIABETES_N20	875	647.883	26.7816	8.48032	1.12285e-17	2.0667e-17	enrichment
DIABETES_N18	812	626.645	18.5608	9.9864	8.74118e-24	3.70043e-23	enrichment
DIABETES_E11	906	694.352	20.1933	10.4811	5.27438e-26	3.72137e-25	enrichment
METABOLIC_E83	5994	5640.37	181.189	1.95171	0.0254864	0.0267502	enrichment
METABOLIC_E03	1916	1647.48	30.5089	8.80144	6.75332e-19	1.34011e-18	enrichment
METABOLIC_E87	843	659.345	19.4605	9.4373	1.91252e-21	5.64859e-21	enrichment
METABOLIC_E23	1389	1197.68	26.4401	7.2359	2.3123e-13	3.62546e-13	enrichment
BLOOD_D63	1574	1322.66	28.8245	8.7195	1.39712e-18	2.72976e-18	enrichment
RESPIRATORY_J84	1143	906.621	23.5057	10.0563	4.31055e-24	2.02756e-23	enrichment
RESPIRATORY_J47	920	739.208	20.3275	8.89398	2.94803e-19	6.24001e-19	enrichment
RESPIRATORY_J44	686	524.214	17.254	9.3767	3.40342e-21	9.8235e-21	enrichment
RESPIRATORY_J22	569	413.631	14.893	10.4324	8.82161e-26	5.89655e-25	enrichment
RESPIRATORY_J20	2339	2104.29	37.1946	6.31022	1.3932e-10	1.94435e-10	enrichment
RESPIRATORY_J40	1345	1248.5	25.8079	3.73901	9.23735e-05	0.000103818	enrichment
CV_I12	1193	945.859	22.3891	11.0385	1.24624e-28	1.21748e-27	enrichment
CV_I71	947	753.321	21.1726	9.14761	2.9103e-20	6.97373e-20	enrichment
CV_I64	784	605.888	19.1981	9.27757	8.66919e-21	2.34253e-20	enrichment
CV_I51	1313	1113.22	25.3617	7.87727	1.67307e-15	2.79579e-15	enrichment
CV_I26	938	718.51	29.0211	7.56313	1.96746e-14	3.16288e-14	enrichment
CV_I35	793	622.123	19.7715	8.64259	2.74776e-18	5.20843e-18	enrichment
CV_I48	1923	1615.39	48.2563	6.37443	9.18249e-11	1.29575e-10	enrichment
CV_I44	816	641.356	18.9614	9.2105	1.62305e-20	4.20667e-20	enrichment
CV_I65	961	787.161	21.336	8.14767	1.85498e-16	3.14111e-16	enrichment
CV_I46	1586	1423.63	29.4333	5.51667	1.72739e-08	2.17207e-08	enrichment
CV_I34	930	736.443	20.115	9.62252	3.21192e-22	1.04593e-21	enrichment
CV_I21	928	794.351	28.3154	4.72001	1.17915e-06	1.3866e-06	enrichment
CV_I85	1116	921.586	25.3551	7.66765	8.75905e-15	1.42615e-14	enrichment
CV_I25	2167	1766.73	62.1709	6.43814	6.0472e-11	8.62915e-11	enrichment
CV_I24	907	676.43	19.0342	12.1135	4.4804e-34	9.48351e-33	enrichment
CV_I22	921	717.797	19.9817	10.1694	1.35724e-24	7.49434e-24	enrichment
CV_I20	707	551.878	21.6908	7.15151	4.29158e-13	6.64671e-13	enrichment
CV_I31	928	792.07	22.2375	6.11264	4.89981e-10	6.69114e-10	enrichment
CV_I30	1662	1597.44	32.9162	1.96134	0.0249195	0.0263732	enrichment
CV_I73	831	653.99	20.5801	8.60102	3.95061e-18	7.37835e-18	enrichment
CV_I10	785	604.441	18.1908	9.92587	1.60647e-23	6.18247e-23	enrichment
CV_I80	1116	888.557	38.5985	5.89253	1.90164e-09	2.54219e-09	enrichment
CV_I82	1632	1361.09	29.4837	9.18844	1.99297e-20	5.06215e-20	enrichment
CV_I42	912	743.668	20.4971	8.21247	1.08341e-16	1.88484e-16	enrichment
CV_I86	1480	1359.11	30.2867	3.99152	3.28251e-05	3.72213e-05	enrichment
CV_I74	818	636.376	18.6528	9.7371	1.04727e-22	3.69454e-22	enrichment
CV_I63	625	475.488	16.3422	9.14881	2.87834e-20	6.97373e-20	enrichment
CV_I78	1124	948.685	26.7148	6.56247	2.64614e-11	3.86276e-11	enrichment
CV_I47	783	581.373	18.9985	10.6128	1.29979e-26	1.03171e-25	enrichment
CV_I83	1591	1342.18	45.971	5.41246	3.10824e-08	3.83249e-08	enrichment
CV_I70	871	656.309	19.1754	11.1961	2.12923e-29	2.70412e-28	enrichment
CV_I27	1790	1632.45	30.9825	5.08517	1.83652e-07	2.20036e-07	enrichment
CV_I50	765	591.019	18.0985	9.613	3.52329e-22	1.11865e-21	enrichment
CV_I61	888	716.243	20.328	8.44929	1.46545e-17	2.65874e-17	enrichment
CV_I84	534	412.059	20.3279	5.99869	9.94564e-10	1.34372e-09	enrichment
CV_I33	1636	1508.42	30.91	4.1275	1.83363e-05	2.09793e-05	enrichment
CV_I08	1215	1004.4	23.4779	8.97008	1.48147e-19	3.2439e-19	enrichment
CV_I95	866	676.139	20.8288	9.11533	3.92171e-20	9.05559e-20	enrichment
NEOPLASM_C25	1057	1014.24	35.0716	1.21916	0.111391	0.114086	enrichment
BLOOD_D64	970	884.192	99.7229	0.860464	0.194767	0.197883	enrichment
MUSCULOSKELETAL_M80	1500	1585.91	35.0984	-2.44769	0.00718873	0.00773702	depletion
MUSCULOSKELETAL_M06	3415	4634.96	372.125	-3.27836	0.000522053	0.000566673	depletion
MUSCULOSKELETAL_M05	2482	2970.27	206.19	-2.36807	0.00894056	0.00954161	depletion
DIABETES_E10	4914	5601.83	353.405	-1.94628	0.0258104	0.0268682	depletion
NEOPLASM_C82	1651	1733.78	105.878	-0.781853	0.21715	0.218874	depletion
NEOPLASM_C44	4000	4065.29	209.197	-0.312113	0.377478	0.377478	depletion

## Sheet: SNP Enrich-Hypergeo-ADULTBIAS
trait	FC	Number Target Regions w/nearby Thresholded SNP(s)	Total # of Target Regions	% Targets	Number Background Regions w/nearby Thresholded SNP(s)	Total # of Background Regions	% Background	Hypergeometric test p-value	Hypergeometric test adjusted p-value	Direction
NEOPLASM_D17	1.26696	653	448134	0.15	1118	972073	0.12	1.11022e-16	2.01426e-15	enrich
NEOPLASM_C77	1.26189	701	448134	0.16	1205	972073	0.12	0	0	enrich
NEOPLASM_C43	1.25426	802	448134	0.18	1387	972073	0.14	0	0	enrich
DIABETES_N18	1.24693	745	448134	0.17	1296	972073	0.13	1.11022e-16	2.01426e-15	enrich
DIGESTIVE_K85	1.24634	574	448134	0.13	999	972073	0.1	3.99014e-13	2.66709e-12	enrich
MUSCULOSKELETAL_M18	1.23952	804	448134	0.18	1407	972073	0.14	0	0	enrich
MUSCULOSKELETAL_M06	1.22964	996	448134	0.22	1757	972073	0.18	0	0	enrich
RESPIRATORY_J22	1.2295	526	448134	0.12	928	972073	0.1	6.60411e-11	2.3e-10	enrich
CV_I20	1.22824	560	448134	0.12	989	972073	0.1	2.08209e-11	8.01289e-11	enrich
NEOPLASM_D35	1.22437	762	448134	0.17	1350	972073	0.14	1.62093e-14	1.71548e-13	enrich
NEOPLASM_C83	1.22422	789	448134	0.18	1398	972073	0.14	5.88418e-15	6.79356e-14	enrich
CV_I47	1.22407	702	448134	0.16	1244	972073	0.13	1.76636e-13	1.31958e-12	enrich
CV_I74	1.2232	728	448134	0.16	1291	972073	0.13	7.88258e-14	6.67392e-13	enrich
NEOPLASM_D23	1.21873	536	448134	0.12	954	972073	0.1	2.6941e-10	7.77615e-10	enrich
CV_I63	1.21754	554	448134	0.12	987	972073	0.1	1.68775e-10	5.10344e-10	enrich
MUSCULOSKELETAL_M67	1.21689	653	448134	0.15	1164	972073	0.12	5.02809e-12	2.2806e-11	enrich
NEOPLASM_C67	1.21037	611	448134	0.14	1095	972073	0.11	7.80087e-11	2.54028e-10	enrich
MUSCULOSKELETAL_M47	1.20875	623	448134	0.14	1118	972073	0.12	6.95304e-11	2.32378e-10	enrich
DIGESTIVE_K25	1.20757	702	448134	0.16	1261	972073	0.13	5.99676e-12	2.62617e-11	enrich
CV_I84	1.20749	447	448134	0.1	803	972073	0.08	3.43673e-08	5.97896e-08	enrich
NEOPLASM_D04	1.20605	834	448134	0.19	1500	972073	0.15	1.01918e-13	8.08978e-13	enrich
CV_I70	1.20526	764	448134	0.17	1375	972073	0.14	1.24556e-12	6.87765e-12	enrich
CV_I44	1.20413	700	448134	0.16	1261	972073	0.13	1.30244e-11	5.33579e-11	enrich
NEOPLASM_D22	1.20078	589	448134	0.13	1064	972073	0.11	8.82358e-10	2.19724e-09	enrich
CV_I21	1.20046	663	448134	0.15	1198	972073	0.12	8.88125e-11	2.8198e-10	enrich
NEOPLASM_D18	1.20023	768	448134	0.17	1388	972073	0.14	3.35665e-12	1.57887e-11	enrich
NEOPLASM_C71	1.19771	1064	448134	0.24	1927	972073	0.2	6.66134e-16	1.05749e-14	enrich
MUSCULOSKELETAL_M81	1.19684	629	448134	0.14	1140	972073	0.12	5.02302e-10	1.30189e-09	enrich
MUSCULOSKELETAL_M13	1.19608	649	448134	0.14	1177	972073	0.12	3.12825e-10	8.82861e-10	enrich
CV_I65	1.19461	836	448134	0.19	1518	972073	0.16	1.49258e-12	7.47074e-12	enrich
NEOPLASM_D05	1.19213	726	448134	0.16	1321	972073	0.14	6.70077e-11	2.3e-10	enrich
RESPIRATORY_J44	1.19182	589	448134	0.13	1072	972073	0.11	3.96814e-09	8.26153e-09	enrich
CV_I64	1.19091	672	448134	0.15	1224	972073	0.13	4.11818e-10	1.0896e-09	enrich
CV_I24	1.18823	791	448134	0.18	1444	972073	0.15	2.34182e-11	8.74737e-11	enrich
NEOPLASM_C82	1.18507	967	448134	0.22	1770	972073	0.18	3.76588e-13	2.65704e-12	enrich
MUSCULOSKELETAL_M19	1.18418	535	448134	0.12	980	972073	0.1	6.02435e-08	1.0067e-07	enrich
CV_I71	1.17998	773	448134	0.17	1421	972073	0.15	2.18231e-10	6.44544e-10	enrich
CV_I95	1.17928	716	448134	0.16	1317	972073	0.14	1.10295e-09	2.69374e-09	enrich
DIGESTIVE_K26	1.17799	681	448134	0.15	1254	972073	0.13	3.4547e-09	7.31244e-09	enrich
NEOPLASM_D11	1.17679	938	448134	0.21	1729	972073	0.18	6.57141e-12	2.7819e-11	enrich
MUSCULOSKELETAL_M46	1.1751	1032	448134	0.23	1905	972073	0.2	9.74776e-13	5.89507e-12	enrich
NEOPLASM_C48	1.17443	1464	448134	0.33	2704	972073	0.28	0	0	enrich
MUSCULOSKELETAL_M48	1.17229	548	448134	0.12	1014	972073	0.1	2.38812e-07	3.4465e-07	enrich
NEOPLASM_D46	1.17113	1326	448134	0.3	2456	972073	0.25	2.66454e-15	3.38396e-14	enrich
CV_I10	1.17055	674	448134	0.15	1249	972073	0.13	1.52505e-08	2.97972e-08	enrich
RESPIRATORY_J47	1.1679	806	448134	0.18	1497	972073	0.15	1.1527e-09	2.76214e-09	enrich
CV_I73	1.16669	682	448134	0.15	1268	972073	0.13	2.45913e-08	4.52623e-08	enrich
METABOLIC_E87	1.16594	695	448134	0.16	1293	972073	0.13	2.08503e-08	3.89411e-08	enrich
DIABETES_E10	1.16526	1437	448134	0.32	2675	972073	0.28	1.55431e-15	2.19331e-14	enrich
CV_I42	1.16484	791	448134	0.18	1473	972073	0.15	2.98429e-09	6.53457e-09	enrich
NEOPLASM_C02	1.16364	1332	448134	0.3	2483	972073	0.26	2.83107e-14	2.76574e-13	enrich
CV_I61	1.16308	726	448134	0.16	1354	972073	0.14	1.73936e-08	3.34694e-08	enrich
NEOPLASM_D16	1.16269	1161	448134	0.26	2166	972073	0.22	1.52944e-12	7.47074e-12	enrich
NEOPLASM_D48	1.16166	746	448134	0.17	1393	972073	0.14	1.45896e-08	2.89512e-08	enrich
CV_I26	1.16141	650	448134	0.15	1214	972073	0.12	1.19855e-07	1.83392e-07	enrich
CV_I50	1.15973	625	448134	0.14	1169	972073	0.12	2.65631e-07	3.79046e-07	enrich
NEOPLASM_C80	1.15818	952	448134	0.21	1783	972073	0.18	3.94719e-10	1.0809e-09	enrich
CV_I78	1.15766	895	448134	0.2	1677	972073	0.17	1.42486e-09	3.23137e-09	enrich
CV_I34	1.15472	782	448134	0.17	1469	972073	0.15	2.49645e-08	4.52928e-08	enrich
CV_I22	1.15343	779	448134	0.17	1465	972073	0.15	3.36009e-08	5.92682e-08	enrich
DIGESTIVE_K76	1.15295	742	448134	0.17	1396	972073	0.14	7.53148e-08	1.19562e-07	enrich
DIABETES_N20	1.15265	635	448134	0.14	1195	972073	0.12	6.33511e-07	8.55913e-07	enrich
CV_I30	1.15181	1362	448134	0.3	2565	972073	0.26	6.89004e-13	4.37518e-12	enrich
NEOPLASM_D37	1.15019	596	448134	0.13	1124	972073	0.12	1.91095e-06	2.50196e-06	enrich
CV_I33	1.15002	1362	448134	0.3	2569	972073	0.26	1.21025e-12	6.87765e-12	enrich
NEOPLASM_C20	1.14965	583	448134	0.13	1100	972073	0.11	2.63168e-06	3.35487e-06	enrich
NEOPLASM_C25	1.14909	855	448134	0.19	1614	972073	0.17	1.81136e-08	3.43347e-08	enrich
CV_I12	1.14885	1001	448134	0.22	1890	972073	0.19	1.29356e-09	2.98695e-09	enrich
BLOOD_D64	1.14826	559	448134	0.12	1056	972073	0.11	4.96286e-06	6.00269e-06	enrich
NEOPLASM_D13	1.14677	756	448134	0.17	1430	972073	0.15	1.69411e-07	2.50177e-07	enrich
NEOPLASM_C09	1.14611	1248	448134	0.28	2362	972073	0.24	3.03952e-11	1.10291e-10	enrich
CV_I31	1.14603	774	448134	0.17	1465	972073	0.15	1.39664e-07	2.11159e-07	enrich
CV_I51	1.14498	1052	448134	0.23	1993	972073	0.21	1.27553e-09	2.98695e-09	enrich
NEOPLASM_D24	1.14332	652	448134	0.15	1237	972073	0.13	1.84967e-06	2.44696e-06	enrich
NEOPLASM_D09	1.14313	1474	448134	0.33	2797	972073	0.29	1.49392e-12	7.47074e-12	enrich
NEOPLASM_D41	1.14296	744	448134	0.17	1412	972073	0.15	3.99694e-07	5.57815e-07	enrich
DIABETES_N19	1.14023	1260	448134	0.28	2397	972073	0.25	1.26785e-10	3.92724e-10	enrich
MUSCULOSKELETAL_M15	1.13964	652	448134	0.15	1241	972073	0.13	3.16067e-06	3.93534e-06	enrich
CV_I85	1.1392	876	448134	0.2	1668	972073	0.17	8.58135e-08	1.34547e-07	enrich
NEOPLASM_C15	1.1391	679	448134	0.15	1293	972073	0.13	2.19051e-06	2.83872e-06	enrich
NEOPLASM_D07	1.13884	913	448134	0.2	1739	972073	0.18	5.0424e-08	8.53846e-08	enrich
NEOPLASM_D43	1.13837	1767	448134	0.39	3367	972073	0.35	6.4615e-14	5.8615e-13	enrich
MUSCULOSKELETAL_M05	1.13824	1103	448134	0.25	2102	972073	0.22	2.69115e-09	5.99608e-09	enrich
NEOPLASM_C34	1.13788	491	448134	0.11	936	972073	0.1	5.59394e-05	6.40028e-05	enrich
CV_I86	1.13782	1186	448134	0.26	2261	972073	0.23	7.93006e-10	2.01423e-09	enrich
NEOPLASM_C49	1.13777	1230	448134	0.27	2345	972073	0.24	4.0002e-10	1.0809e-09	enrich
RESPIRATORY_J84	1.13699	922	448134	0.21	1759	972073	0.18	6.3055e-08	1.04e-07	enrich
MUSCULOSKELETAL_M45	1.13218	1546	448134	0.34	2962	972073	0.3	1.65307e-11	6.56061e-11	enrich
DIABETES_E11	1.1316	734	448134	0.16	1407	972073	0.14	2.90068e-06	3.64739e-06	enrich
CV_I08	1.12915	988	448134	0.22	1898	972073	0.2	1.13264e-07	1.75422e-07	enrich
NEOPLASM_D45	1.12745	1052	448134	0.23	2024	972073	0.21	6.59278e-08	1.05997e-07	enrich
CV_I82	1.12683	1280	448134	0.29	2464	972073	0.25	3.33281e-09	7.17401e-09	enrich
DIABETES_N17	1.12662	670	448134	0.15	1290	972073	0.13	1.50191e-05	1.79946e-05	enrich
DIABETES_N28	1.12584	805	448134	0.18	1551	972073	0.16	2.64163e-06	3.35487e-06	enrich
MUSCULOSKELETAL_M80	1.12562	1152	448134	0.26	2220	972073	0.23	2.53616e-08	4.53651e-08	enrich
NEOPLASM_C81	1.12462	1306	448134	0.29	2519	972073	0.26	4.16916e-09	8.54005e-09	enrich
MUSCULOSKELETAL_M10	1.12198	945	448134	0.21	1827	972073	0.19	8.16126e-07	1.09103e-06	enrich
METABOLIC_E23	1.11741	1106	448134	0.25	2147	972073	0.22	2.77026e-07	3.90914e-07	enrich
CV_I80	1.11394	664	448134	0.15	1293	972073	0.13	8.58747e-05	9.73758e-05	enrich
METABOLIC_E03	1.11241	1519	448134	0.34	2962	972073	0.3	8.59253e-09	1.73214e-08	enrich
NEOPLASM_C73	1.10999	983	448134	0.22	1921	972073	0.2	4.66299e-06	5.69423e-06	enrich
CV_I46	1.10935	1209	448134	0.27	2364	972073	0.24	4.93462e-07	6.73868e-07	enrich
CV_I27	1.10661	1381	448134	0.31	2707	972073	0.28	1.6164e-07	2.41509e-07	enrich
NEOPLASM_D38	1.10495	1573	448134	0.35	3088	972073	0.32	3.82575e-08	6.56582e-08	enrich
NEOPLASM_C69	1.10494	1384	448134	0.31	2717	972073	0.28	2.35097e-07	3.43188e-07	enrich
NEOPLASM_C45	1.10409	1330	448134	0.3	2613	972073	0.27	4.80166e-07	6.62838e-07	enrich
NEOPLASM_D14	1.10294	1141	448134	0.25	2244	972073	0.23	3.61619e-06	4.4588e-06	enrich
NEOPLASM_C01	1.1002	1655	448134	0.37	3263	972073	0.34	6.5935e-08	1.05997e-07	enrich
RESPIRATORY_J40	1.09618	1039	448134	0.23	2056	972073	0.21	3.04379e-05	3.51419e-05	enrich
MUSCULOSKELETAL_M16	1.09588	824	448134	0.18	1631	972073	0.17	0.000189706	0.000211339	enrich
NEOPLASM_D21	1.09558	896	448134	0.2	1774	972073	0.18	0.000108999	0.000122503	enrich
MUSCULOSKELETAL_M65	1.09485	533	448134	0.12	1056	972073	0.11	0.00242219	0.00265188	enrich
NEOPLASM_C44	1.09041	1215	448134	0.27	2417	972073	0.25	2.16236e-05	2.56653e-05	enrich
BLOOD_D63	1.08997	1213	448134	0.27	2414	972073	0.25	2.38334e-05	2.80263e-05	enrich
MUSCULOSKELETAL_M00	1.08688	945	448134	0.21	1886	972073	0.19	0.000265368	0.000293058	enrich
DIGESTIVE_K29	1.08458	264	448134	0.06	528	972073	0.05	0.0398496	0.0414828	enrich
MUSCULOSKELETAL_M17	1.08458	485	448134	0.11	970	972073	0.1	0.00814901	0.00869684	enrich
METABOLIC_E83	1.0771	1584	448134	0.35	3190	972073	0.33	3.02691e-05	3.51419e-05	enrich
NEOPLASM_C18	1.07644	463	448134	0.1	933	972073	0.1	0.0167829	0.0177619	enrich
NEOPLASM_C64	1.07044	719	448134	0.16	1457	972073	0.15	0.00696037	0.00755527	enrich
CV_I35	1.05757	607	448134	0.14	1245	972073	0.13	0.0321559	0.0337504	enrich
RESPIRATORY_J20	1.04556	1648	448134	0.37	3419	972073	0.35	0.0071625	0.00770879	enrich
CV_I25	1.02805	782	448134	0.17	1650	972073	0.17	0.151538	0.156466	enrich
NEOPLASM_D12	1.02739	503	448134	0.11	1062	972073	0.11	0.213201	0.218359	enrich
CV_I83	0.972672	691	448134	0.15	1541	972073	0.16	0.845786	0.859319	depleted
NEOPLASM_C50	0.950361	570	448134	0.13	1301	972073	0.13	0.954135	0.961707	depleted
CV_I48	0.868568	768	448134	0.17	1918	972073	0.2	4.95426e-08	6.29191e-06	depleted
ADDITIONAL DEVELOPMENTAL TRAIT GWAS
trait	FC	Number Target Regions w/nearby Thresholded SNP(s)	Total # of Target Regions	% Targets	Number Background Regions w/nearby Thresholded SNP(s)	Total # of Background Regions	% Background	Hypergeometric test p-value	Hypergeometric test adjusted p-value	Direction
birth_length	0.30988	2	448134	4.46295e-06	14	972073	1.44022e-05	0.0138916	0.0231527	depleted
BW_maternal	0.912664	361	448134	0.08	858	972073	0.09	0.00970135	0.0194027	depleted
child_BMI	0.796021	120	448134	0.03	327	972073	0.03	0.000361665	0.000904162	depleted
child_epi	1.20703	69	448134	0.02	124	972073	0.01	0.0207201	0.207201	enrich
cong_stomach	0.929639	126	448134	0.03	294	972073	0.03	0.14511	0.181388	depleted
BW_fetal	0.821417	373	448134	0.08	985	972073	0.1	1.06778e-07	3.55927e-07	depleted
gest_duration	0.765585	30	448134	0.01	85	972073	0.01	0.0285574	0.0407963	depleted
hoshi_BW	0.75497	615	448134	0.14	1767	972073	0.18	3.66056e-22	1.83028e-21	depleted
puberty_growth	0.877992	17	448134	3.79351e-05	42	972073	4.32066e-05	0.283334	0.314815	depleted
height	0.876991	34693	448134	7.74	85810	972073	8.83	4.4046e-269	4.4046e-268	depleted
LONGEVITY GWAS
trait	FC	Number Target Regions w/nearby Thresholded SNP(s)	Total # of Target Regions	% Targets	Number Background Regions w/nearby Thresholded SNP(s)	Total # of Background Regions	% Background	Hypergeometric test p-value	Hypergeometric test adjusted p-value	Direction
father_age	1.11192	305	448134	0.07	595	972073	0.06	0.00655507	0.00951499	enrich
lifegen_age	1.16625	357	448134	0.08	664	972073	0.07	4.48494e-05	0.000179398	enrich
mother_age	1.14675	166	448134	0.04	314	972073	0.03	0.00951499	0.00951499	enrich
combo_age	1.11592	267	448134	0.06	519	972073	0.05	0.00829989	0.00951499	enrich

## Sheet: SNP Enrich-Hypergeo-FETALBIAS
trait	FC	Number Target Regions w/nearby Thresholded SNP(s)	Total # of Target Regions	% Targets	Number Background Regions w/nearby Thresholded SNP(s)	Total # of Background Regions	% Background	Hypergeometric test p-value	Hypergeometric test adjusted p-value	Direction
CV_I48	1.27454	609	242167	0.25	1918	972073	0.2	8.68605e-12	1.10313e-09	enrich
NEOPLASM_C50	1.15701	375	242167	0.15	1301	972073	0.13	0.000722224	0.0458612	enrich
DIGESTIVE_K29	1.09474	144	242167	0.06	528	972073	0.05	0.114969	0.999999	enrich
NEOPLASM_C18	1.09279	254	242167	0.1	933	972073	0.1	0.0563466	0.999999	enrich
CV_I83	1.09143	419	242167	0.17	1541	972073	0.16	0.0214473	0.680953	enrich
METABOLIC_E83	1.07461	854	242167	0.35	3190	972073	0.33	0.00830942	0.351766	enrich
NEOPLASM_C64	1.07446	390	242167	0.16	1457	972073	0.15	0.0547661	0.999999	enrich
CV_I80	1.05551	340	242167	0.14	1293	972073	0.13	0.131963	0.999999	enrich
CV_I35	1.05107	326	242167	0.13	1245	972073	0.13	0.157247	0.999999	enrich
NEOPLASM_C20	1.0473	287	242167	0.12	1100	972073	0.11	0.191939	0.999999	enrich
DIABETES_N17	1.04241	335	242167	0.14	1290	972073	0.13	0.198411	0.999999	enrich
NEOPLASM_D14	1.03214	577	242167	0.24	2244	972073	0.23	0.196403	0.999999	enrich
RESPIRATORY_J20	1.02964	877	242167	0.36	3419	972073	0.35	0.16347	0.999999	enrich
MUSCULOSKELETAL_M05	1.02357	536	242167	0.22	2102	972073	0.22	0.274098	0.999999	enrich
RESPIRATORY_J40	1.02109	523	242167	0.22	2056	972073	0.21	0.298455	0.999999	enrich
NEOPLASM_D12	1.02052	270	242167	0.11	1062	972073	0.11	0.361243	0.999999	enrich
CV_I51	1.0151	504	242167	0.21	1993	972073	0.21	0.357034	0.999999	enrich
MUSCULOSKELETAL_M00	1.00884	474	242167	0.2	1886	972073	0.19	0.421186	0.999999	enrich
NEOPLASM_C34	1.0078	235	242167	0.1	936	972073	0.1	0.457784	0.999999	enrich
CV_I22	1.00557	367	242167	0.15	1465	972073	0.15	0.461101	0.999999	enrich
CV_I26	1.00186	303	242167	0.13	1214	972073	0.12	0.496118	0.999999	enrich
NEOPLASM_C15	0.993426	320	242167	0.13	1293	972073	0.13	0.460662	0.557181	depleted
MUSCULOSKELETAL_M17	0.99317	240	242167	0.1	970	972073	0.1	0.468401	0.561198	depleted
METABOLIC_E23	0.992765	531	242167	0.22	2147	972073	0.22	0.434752	0.5309	depleted
NEOPLASM_D45	0.991616	500	242167	0.21	2024	972073	0.21	0.425583	0.524748	depleted
CV_I08	0.989768	468	242167	0.19	1898	972073	0.2	0.410508	0.511123	depleted
NEOPLASM_D41	0.986458	347	242167	0.14	1412	972073	0.15	0.39831	0.505116	depleted
CV_I71	0.98586	349	242167	0.14	1421	972073	0.15	0.392885	0.504005	depleted
MUSCULOSKELETAL_M65	0.984509	259	242167	0.11	1056	972073	0.11	0.401706	0.505116	depleted
MUSCULOSKELETAL_M10	0.984291	448	242167	0.18	1827	972073	0.19	0.360878	0.467668	depleted
MUSCULOSKELETAL_M13	0.97879	287	242167	0.12	1177	972073	0.12	0.351655	0.460415	depleted
CV_I95	0.97837	321	242167	0.13	1317	972073	0.14	0.338647	0.448001	depleted
CV_I42	0.978308	359	242167	0.15	1473	972073	0.15	0.327899	0.43835	depleted
NEOPLASM_C01	0.977989	795	242167	0.33	3263	972073	0.34	0.240882	0.351632	depleted
DIGESTIVE_K26	0.976307	305	242167	0.13	1254	972073	0.13	0.327599	0.43835	depleted
NEOPLASM_D21	0.975231	431	242167	0.18	1774	972073	0.18	0.284037	0.400808	depleted
NEOPLASM_C71	0.974873	468	242167	0.19	1927	972073	0.2	0.271982	0.388109	depleted
DIABETES_E11	0.972846	341	242167	0.14	1407	972073	0.14	0.29024	0.405061	depleted
NEOPLASM_D05	0.972369	320	242167	0.13	1321	972073	0.14	0.293471	0.405118	depleted
NEOPLASM_D37	0.971374	272	242167	0.11	1124	972073	0.12	0.303497	0.414452	depleted
NEOPLASM_C49	0.970564	567	242167	0.23	2345	972073	0.24	0.212811	0.321751	depleted
CV_I46	0.969555	571	242167	0.24	2364	972073	0.24	0.203657	0.315421	depleted
METABOLIC_E87	0.965486	311	242167	0.13	1293	972073	0.13	0.248162	0.358143	depleted
BLOOD_D63	0.962776	579	242167	0.24	2414	972073	0.25	0.151157	0.24931	depleted
CV_I73	0.962362	304	242167	0.13	1268	972073	0.13	0.230395	0.340234	depleted
CV_I31	0.961731	351	242167	0.14	1465	972073	0.15	0.208275	0.318686	depleted
CV_I64	0.960882	293	242167	0.12	1224	972073	0.13	0.22562	0.337103	depleted
NEOPLASM_C25	0.957505	385	242167	0.16	1614	972073	0.17	0.169794	0.272959	depleted
NEOPLASM_D09	0.955797	666	242167	0.28	2797	972073	0.29	0.0918489	0.174102	depleted
DIABETES_N28	0.954989	369	242167	0.15	1551	972073	0.16	0.16049	0.261311	depleted
NEOPLASM_D24	0.954029	294	242167	0.12	1237	972073	0.13	0.1846	0.293053	depleted
NEOPLASM_D07	0.951002	412	242167	0.17	1739	972073	0.18	0.124701	0.223056	depleted
MUSCULOSKELETAL_M48	0.950074	240	242167	0.1	1014	972073	0.1	0.189825	0.297627	depleted
NEOPLASM_C80	0.950047	422	242167	0.17	1783	972073	0.18	0.116896	0.215157	depleted
NEOPLASM_D35	0.948508	319	242167	0.13	1350	972073	0.14	0.144632	0.24491	depleted
CV_I70	0.945859	324	242167	0.13	1375	972073	0.14	0.129768	0.228896	depleted
CV_I34	0.945449	346	242167	0.14	1469	972073	0.15	0.119589	0.216968	depleted
CV_I10	0.944863	294	242167	0.12	1249	972073	0.13	0.137526	0.239257	depleted
CV_I86	0.942709	531	242167	0.22	2261	972073	0.23	0.0602758	0.134299	depleted
BLOOD_D64	0.942696	248	242167	0.1	1056	972073	0.11	0.149607	0.24931	depleted
NEOPLASM_C44	0.939991	566	242167	0.23	2417	972073	0.25	0.0459665	0.116755	depleted
CV_I85	0.938539	390	242167	0.16	1668	972073	0.17	0.0772614	0.153316	depleted
NEOPLASM_D23	0.938297	223	242167	0.09	954	972073	0.1	0.144183	0.24491	depleted
DIABETES_N19	0.937786	560	242167	0.23	2397	972073	0.25	0.0408266	0.105816	depleted
CV_I30	0.935832	598	242167	0.25	2565	972073	0.26	0.0313624	0.0911969	depleted
CV_I47	0.935754	290	242167	0.12	1244	972073	0.13	0.100832	0.188318	depleted
NEOPLASM_C69	0.935186	633	242167	0.26	2717	972073	0.28	0.0263788	0.0797646	depleted
CV_I25	0.934181	384	242167	0.16	1650	972073	0.17	0.0643574	0.140252	depleted
CV_I65	0.933441	353	242167	0.15	1518	972073	0.16	0.0706294	0.144676	depleted
CV_I44	0.932688	293	242167	0.12	1261	972073	0.13	0.0885495	0.170391	depleted
RESPIRATORY_J84	0.931061	408	242167	0.17	1759	972073	0.18	0.0497353	0.121469	depleted
CV_I78	0.928715	388	242167	0.16	1677	972073	0.17	0.0481347	0.119865	depleted
CV_I61	0.927918	313	242167	0.13	1354	972073	0.14	0.0662607	0.140252	depleted
NEOPLASM_C67	0.92745	253	242167	0.1	1095	972073	0.11	0.0879173	0.170391	depleted
NEOPLASM_D13	0.926322	330	242167	0.14	1430	972073	0.15	0.0566707	0.130858	depleted
CV_I82	0.925319	568	242167	0.23	2464	972073	0.25	0.0166381	0.0586957	depleted
MUSCULOSKELETAL_M15	0.925078	286	242167	0.12	1241	972073	0.13	0.067405	0.140335	depleted
NEOPLASM_C45	0.920177	599	242167	0.25	2613	972073	0.27	0.0094299	0.0374249	depleted
DIGESTIVE_K76	0.917253	319	242167	0.13	1396	972073	0.14	0.0390049	0.103201	depleted
DIABETES_N20	0.91702	273	242167	0.11	1195	972073	0.12	0.0516162	0.123684	depleted
RESPIRATORY_J22	0.917005	212	242167	0.09	928	972073	0.1	0.0769603	0.153316	depleted
DIABETES_E10	0.916856	611	242167	0.25	2675	972073	0.28	0.00661269	0.0312676	depleted
CV_I50	0.916813	267	242167	0.11	1169	972073	0.12	0.0531754	0.125061	depleted
NEOPLASM_D48	0.916347	318	242167	0.13	1393	972073	0.14	0.0375178	0.103201	depleted
METABOLIC_E03	0.916106	676	242167	0.28	2962	972073	0.3	0.0042155	0.0296814	depleted
NEOPLASM_D38	0.915123	704	242167	0.29	3088	972073	0.32	0.00323343	0.0241786	depleted
CV_I63	0.915059	225	242167	0.09	987	972073	0.1	0.0656252	0.140252	depleted
NEOPLASM_C02	0.915005	566	242167	0.23	2483	972073	0.26	0.00736198	0.0322404	depleted
NEOPLASM_C81	0.914677	574	242167	0.24	2519	972073	0.26	0.00681514	0.0312676	depleted
NEOPLASM_C82	0.913936	403	242167	0.17	1770	972073	0.18	0.0189637	0.0650916	depleted
MUSCULOSKELETAL_M80	0.913108	505	242167	0.21	2220	972073	0.23	0.00924935	0.0374249	depleted
NEOPLASM_D04	0.91253	341	242167	0.14	1500	972073	0.15	0.0263658	0.0797646	depleted
CV_I33	0.9125	584	242167	0.24	2569	972073	0.26	0.00528245	0.0312676	depleted
DIGESTIVE_K85	0.912104	227	242167	0.09	999	972073	0.1	0.0577683	0.13101	depleted
NEOPLASM_D46	0.911989	558	242167	0.23	2456	972073	0.25	0.0059783	0.0312676	depleted
MUSCULOSKELETAL_M46	0.910275	432	242167	0.18	1905	972073	0.2	0.0122269	0.0455652	depleted
NEOPLASM_C73	0.908962	435	242167	0.18	1921	972073	0.2	0.010909	0.0419833	depleted
CV_I24	0.906221	326	242167	0.13	1444	972073	0.15	0.0206595	0.0672757	depleted
NEOPLASM_D22	0.901655	239	242167	0.1	1064	972073	0.11	0.0337979	0.0953851	depleted
CV_I20	0.901033	222	242167	0.09	989	972073	0.1	0.0383253	0.103201	depleted
DIGESTIVE_K25	0.900856	283	242167	0.12	1261	972073	0.13	0.0220124	0.0698893	depleted
CV_I12	0.900509	424	242167	0.18	1890	972073	0.19	0.00636821	0.0312676	depleted
NEOPLASM_D43	0.900094	755	242167	0.31	3367	972073	0.35	0.000389374	0.00706435	depleted
CV_I27	0.900087	607	242167	0.25	2707	972073	0.28	0.00131942	0.016515	depleted
NEOPLASM_C09	0.893902	526	242167	0.22	2362	972073	0.24	0.00143043	0.016515	depleted
NEOPLASM_D11	0.893819	385	242167	0.16	1729	972073	0.18	0.00548181	0.0312676	depleted
MUSCULOSKELETAL_M45	0.891712	658	242167	0.27	2962	972073	0.3	0.000315788	0.00668418	depleted
RESPIRATORY_J47	0.884863	330	242167	0.14	1497	972073	0.15	0.00512915	0.0312676	depleted
CV_I84	0.884793	177	242167	0.07	803	972073	0.08	0.0315958	0.0911969	depleted
MUSCULOSKELETAL_M19	0.884732	216	242167	0.09	980	972073	0.1	0.0195319	0.0652776	depleted
MUSCULOSKELETAL_M47	0.883237	246	242167	0.1	1118	972073	0.12	0.0125573	0.0455652	depleted
DIABETES_N18	0.879624	284	242167	0.12	1296	972073	0.13	0.00630123	0.0312676	depleted
MUSCULOSKELETAL_M16	0.878614	357	242167	0.15	1631	972073	0.17	0.0023105	0.0221896	depleted
NEOPLASM_C83	0.878614	306	242167	0.13	1398	972073	0.14	0.00444052	0.0296814	depleted
NEOPLASM_D18	0.873376	302	242167	0.12	1388	972073	0.14	0.0032365	0.0241786	depleted
MUSCULOSKELETAL_M81	0.873234	248	242167	0.1	1140	972073	0.12	0.00689364	0.0312676	depleted
RESPIRATORY_J44	0.872459	233	242167	0.1	1072	972073	0.11	0.00818336	0.0346429	depleted
MUSCULOSKELETAL_M18	0.870141	305	242167	0.13	1407	972073	0.14	0.0024461	0.0221896	depleted
MUSCULOSKELETAL_M06	0.868152	380	242167	0.16	1757	972073	0.18	0.000679826	0.0107922	depleted
CV_I74	0.864376	278	242167	0.11	1291	972073	0.13	0.00243535	0.0221896	depleted
MUSCULOSKELETAL_M67	0.858678	249	242167	0.1	1164	972073	0.12	0.00267612	0.0226578	depleted
CV_I21	0.847711	253	242167	0.1	1198	972073	0.12	0.00113142	0.0159656	depleted
NEOPLASM_D16	0.845065	456	242167	0.19	2166	972073	0.22	1.3011e-05	0.0005508	depleted
NEOPLASM_C48	0.841706	567	242167	0.23	2704	972073	0.28	7.4772e-07	7.57865e-05	depleted
NEOPLASM_D17	0.8222	229	242167	0.09	1118	972073	0.12	0.000271349	0.00668418	depleted
NEOPLASM_C77	0.806143	242	242167	0.1	1205	972073	0.12	4.2347e-05	0.00134452	depleted
NEOPLASM_C43	0.78429	271	242167	0.11	1387	972073	0.14	1.19349e-06	7.57865e-05	depleted
ADDITIONAL DEVELOPMENTAL TRAIT GWAS
trait	FC	Number Target Regions w/nearby Thresholded SNP(s)	Total # of Target Regions	% Targets	Number Background Regions w/nearby Thresholded SNP(s)	Total # of Background Regions	% Background	Hypergeometric test p-value	Hypergeometric test adjusted p-value	Direction
birth_length	1.14687	4	242167	0.00114797	14	972073	1.44022e-05	0.475573	0.528415	enrich
BW_maternal	1.05264	225	242167	0.09	858	972073	0.09	0.19742	0.329033	enrich
child_BMI	1.21527	99	242167	0.04	327	972073	0.03	0.0160603	0.0535344	enrich
child_epi	0.938772	29	242167	0.01	124	972073	0.01	0.392554	1	depleted
cong_stomach	1.024	75	242167	0.03	294	972073	0.03	0.428384	0.528415	enrich
BW_fetal	1.084	266	242167	0.11	985	972073	0.1	0.0700443	0.140089	enrich
gest_duration	1.3695	29	242167	0.01	85	972073	0.01	0.0362584	0.090646	enrich
hoshi_BW	1.2835	565	242167	0.23	1767	972073	0.18	1.36597e-11	6.82987e-11	enrich
puberty_growth	1.14687	12	242167	4.95526e-05	42	972073	4.32066e-05	0.346355	0.494793	enrich
height	1.17784	25179	242167	10.4	85810	972073	8.83	0	0	enrich
LONGEVITY GWAS
trait	FC	Number Target Regions w/nearby Thresholded SNP(s)	Total # of Target Regions	% Targets	Number Background Regions w/nearby Thresholded SNP(s)	Total # of Background Regions	% Background	Hypergeometric test p-value	Hypergeometric test adjusted p-value	Direction
father_age	0.877022	130	242167	0.05	595	972073	0.06	0.0448871	0.0897743	depleted
lifegen_age	0.846338	140	242167	0.06	664	972073	0.07	0.011621	0.0464842	depleted
mother_age	0.882071	69	242167	0.03	314	972073	0.03	0.126673	0.168898	depleted
combo_age	0.959043	124	242167	0.05	519	972073	0.05	0.315517	0.315517	depleted

## Sheet: SNP Enrich-Hypergeo-YOUNGBIAS
trait	FC	Number Target Regions w/nearby Thresholded SNP(s)	Total # of Target Regions	% Targets	Number Background Regions w/nearby Thresholded SNP(s)	Total # of Background Regions	% Background	Hypergeometric test p-value	Hypergeometric test adjusted p-value	Direction
BLOOD_D63	1.37713	338	98833	0.34	2414	972073	0.25	1.61741e-09	2.01383e-09	enrich
BLOOD_D64	1.83484	197	98833	0.2	1056	972073	0.11	0	0	enrich
CV_I08	1.49761	289	98833	0.29	1898	972073	0.2	4.21019e-12	6.85505e-12	enrich
CV_I10	1.70094	216	98833	0.22	1249	972073	0.13	1.09912e-14	2.44892e-14	enrich
CV_I12	1.4415	277	98833	0.28	1890	972073	0.19	5.90648e-10	7.65432e-10	enrich
CV_I20	1.73041	174	98833	0.18	989	972073	0.1	8.58313e-13	1.51397e-12	enrich
CV_I21	1.49421	182	98833	0.18	1198	972073	0.12	3.75765e-08	4.2232e-08	enrich
CV_I22	1.71198	255	98833	0.26	1465	972073	0.15	0	0	enrich
CV_I24	1.66877	245	98833	0.25	1444	972073	0.15	1.77636e-15	5.01327e-15	enrich
CV_I25	1.02528	172	98833	0.17	1650	972073	0.17	0.376491	0.376491	enrich
CV_I26	1.68516	208	98833	0.21	1214	972073	0.12	8.4599e-14	1.67876e-13	enrich
CV_I27	1.32981	366	98833	0.37	2707	972073	0.28	1.76755e-08	2.02233e-08	enrich
CV_I30	1.36125	355	98833	0.36	2565	972073	0.26	2.36726e-09	2.86325e-09	enrich
CV_I31	1.65156	246	98833	0.25	1465	972073	0.15	5.32907e-15	1.35358e-14	enrich
CV_I33	1.42039	371	98833	0.38	2569	972073	0.26	6.10956e-12	9.82169e-12	enrich
CV_I34	1.48637	222	98833	0.22	1469	972073	0.15	2.13961e-09	2.61279e-09	enrich
CV_I35	1.5879	201	98833	0.2	1245	972073	0.13	5.06548e-11	7.31041e-11	enrich
CV_I42	1.71604	257	98833	0.26	1473	972073	0.15	0	0	enrich
CV_I44	1.51316	194	98833	0.2	1261	972073	0.13	5.30094e-09	6.29177e-09	enrich
CV_I46	1.45203	349	98833	0.35	2364	972073	0.24	1.64124e-12	2.81673e-12	enrich
CV_I47	1.81846	230	98833	0.23	1244	972073	0.13	0	0	enrich
CV_I48	1.54353	301	98833	0.3	1918	972073	0.2	4.11893e-14	8.43716e-14	enrich
CV_I50	1.90989	227	98833	0.23	1169	972073	0.12	0	0	enrich
CV_I51	1.66804	338	98833	0.34	1993	972073	0.21	0	0	enrich
CV_I61	1.53271	211	98833	0.21	1354	972073	0.14	4.00579e-10	5.24469e-10	enrich
CV_I63	1.74388	175	98833	0.18	987	972073	0.1	3.75477e-13	6.91096e-13	enrich
CV_I64	1.6955	211	98833	0.21	1224	972073	0.13	3.04201e-14	6.33337e-14	enrich
CV_I65	1.43192	221	98833	0.22	1518	972073	0.16	4.86627e-08	5.4212e-08	enrich
CV_I70	1.80258	252	98833	0.25	1375	972073	0.14	0	0	enrich
CV_I71	1.75807	254	98833	0.26	1421	972073	0.15	0	0	enrich
CV_I73	1.69096	218	98833	0.22	1268	972073	0.13	1.54321e-14	3.32182e-14	enrich
CV_I74	1.56942	206	98833	0.21	1291	972073	0.13	8.35272e-11	1.17866e-10	enrich
CV_I78	1.49556	255	98833	0.26	1677	972073	0.17	8.17488e-11	1.16653e-10	enrich
CV_I80	1.90929	251	98833	0.25	1293	972073	0.13	0	0	enrich
CV_I82	1.43701	360	98833	0.36	2464	972073	0.25	2.85572e-12	4.77205e-12	enrich
CV_I83	1.65946	260	98833	0.26	1541	972073	0.16	4.44089e-16	1.34284e-15	enrich
CV_I84	1.6168	132	98833	0.13	803	972073	0.08	3.01845e-08	3.4227e-08	enrich
CV_I85	1.52132	258	98833	0.26	1668	972073	0.17	1.12386e-11	1.74061e-11	enrich
CV_I86	1.43987	331	98833	0.33	2261	972073	0.23	1.61682e-11	2.47393e-11	enrich
CV_I95	1.69526	227	98833	0.23	1317	972073	0.14	3.44169e-15	8.9203e-15	enrich
DIABETES_E10	1.66193	452	98833	0.46	2675	972073	0.28	0	0	enrich
DIABETES_E11	1.69867	243	98833	0.25	1407	972073	0.14	3.33067e-16	1.0317e-15	enrich
DIABETES_N17	1.79936	236	98833	0.24	1290	972073	0.13	0	0	enrich
DIABETES_N18	1.62407	214	98833	0.22	1296	972073	0.13	1.48481e-12	2.58317e-12	enrich
DIABETES_N19	1.39921	341	98833	0.35	2397	972073	0.25	2.34942e-10	3.1408e-10	enrich
DIABETES_N20	1.89303	230	98833	0.23	1195	972073	0.12	0	0	enrich
DIABETES_N28	1.49657	236	98833	0.24	1551	972073	0.16	3.71156e-10	4.91008e-10	enrich
DIGESTIVE_K25	1.95774	251	98833	0.25	1261	972073	0.13	0	0	enrich
DIGESTIVE_K26	1.54513	197	98833	0.2	1254	972073	0.13	7.63936e-10	9.70198e-10	enrich
DIGESTIVE_K29	1.84416	99	98833	0.1	528	972073	0.05	2.10014e-09	2.58949e-09	enrich
DIGESTIVE_K76	1.55705	221	98833	0.22	1396	972073	0.14	3.75939e-11	5.48785e-11	enrich
DIGESTIVE_K85	1.71309	174	98833	0.18	999	972073	0.1	2.03904e-12	3.45277e-12	enrich
METABOLIC_E83	1.47378	478	98833	0.48	3190	972073	0.33	0	0	enrich
METABOLIC_E23	1.33767	292	98833	0.3	2147	972073	0.22	2.64342e-07	2.86935e-07	enrich
METABOLIC_E03	1.23525	372	98833	0.38	2962	972073	0.3	1.61278e-05	1.6518e-05	enrich
METABOLIC_E87	1.70391	224	98833	0.23	1293	972073	0.13	2.9976e-15	7.93116e-15	enrich
MUSCULOSKELETAL_M00	1.67923	322	98833	0.33	1886	972073	0.19	0	0	enrich
MUSCULOSKELETAL_M05	1.48796	318	98833	0.32	2102	972073	0.22	8.33555e-13	1.49101e-12	enrich
MUSCULOSKELETAL_M06	1.67377	299	98833	0.3	1757	972073	0.18	0	0	enrich
MUSCULOSKELETAL_M13	1.88855	226	98833	0.23	1177	972073	0.12	0	0	enrich
MUSCULOSKELETAL_M10	1.50197	279	98833	0.28	1827	972073	0.19	7.05347e-12	1.10591e-11	enrich
MUSCULOSKELETAL_M15	1.7119	216	98833	0.22	1241	972073	0.13	5.55112e-15	1.38234e-14	enrich
MUSCULOSKELETAL_M16	1.37492	228	98833	0.23	1631	972073	0.17	6.92862e-07	7.33279e-07	enrich
MUSCULOSKELETAL_M17	1.51082	149	98833	0.15	970	972073	0.1	3.06639e-07	3.30027e-07	enrich
MUSCULOSKELETAL_M18	1.6777	240	98833	0.24	1407	972073	0.14	1.9984e-15	5.51733e-15	enrich
MUSCULOSKELETAL_M19	2.00725	200	98833	0.2	980	972073	0.1	0	0	enrich
MUSCULOSKELETAL_M45	1.43116	431	98833	0.44	2962	972073	0.3	4.30767e-14	8.68371e-14	enrich
MUSCULOSKELETAL_M46	1.51792	294	98833	0.3	1905	972073	0.2	5.85976e-13	1.06313e-12	enrich
MUSCULOSKELETAL_M47	1.65391	188	98833	0.19	1118	972073	0.12	6.53155e-12	1.03688e-11	enrich
MUSCULOSKELETAL_M48	1.78475	184	98833	0.19	1014	972073	0.1	1.08802e-14	2.44892e-14	enrich
MUSCULOSKELETAL_M65	1.55543	167	98833	0.17	1056	972073	0.11	8.64014e-09	1.01602e-08	enrich
MUSCULOSKELETAL_M67	1.82515	216	98833	0.22	1164	972073	0.12	0	0	enrich
MUSCULOSKELETAL_M80	1.33355	301	98833	0.3	2220	972073	0.23	2.31307e-07	2.55444e-07	enrich
MUSCULOSKELETAL_M81	1.73416	201	98833	0.2	1140	972073	0.12	1.29896e-14	2.84428e-14	enrich
NEOPLASM_C01	1.35641	450	98833	0.46	3263	972073	0.34	3.33376e-11	4.98102e-11	enrich
NEOPLASM_C02	1.39432	352	98833	0.36	2483	972073	0.26	1.84893e-10	2.49803e-10	enrich
NEOPLASM_C09	1.41162	339	98833	0.34	2362	972073	0.24	9.66565e-11	1.34894e-10	enrich
NEOPLASM_C15	1.68109	221	98833	0.22	1293	972073	0.13	1.90958e-14	4.04195e-14	enrich
NEOPLASM_C18	1.66561	158	98833	0.16	933	972073	0.1	1.69238e-10	2.3111e-10	enrich
NEOPLASM_C20	1.90451	213	98833	0.22	1100	972073	0.11	0	0	enrich
NEOPLASM_C25	1.68191	276	98833	0.28	1614	972073	0.17	0	0	enrich
NEOPLASM_C34	1.69179	161	98833	0.16	936	972073	0.1	3.46727e-11	5.12027e-11	enrich
NEOPLASM_C43	1.90044	268	98833	0.27	1387	972073	0.14	0	0	enrich
NEOPLASM_C44	1.5911	391	98833	0.4	2417	972073	0.25	0	0	enrich
NEOPLASM_C45	1.57338	418	98833	0.42	2613	972073	0.27	0	0	enrich
NEOPLASM_C48	1.28036	352	98833	0.36	2704	972073	0.28	1.24914e-06	1.30033e-06	enrich
NEOPLASM_C49	1.50154	358	98833	0.36	2345	972073	0.24	9.54792e-15	2.24553e-14	enrich
NEOPLASM_C50	1.27763	169	98833	0.17	1301	972073	0.13	0.000649245	0.000654397	enrich
NEOPLASM_C64	1.64713	244	98833	0.25	1457	972073	0.15	9.32587e-15	2.23469e-14	enrich
NEOPLASM_C67	1.7156	191	98833	0.19	1095	972073	0.11	1.58096e-13	2.99674e-13	enrich
NEOPLASM_C69	1.267	350	98833	0.35	2717	972073	0.28	3.38093e-06	3.49087e-06	enrich
NEOPLASM_C71	1.80683	354	98833	0.36	1927	972073	0.2	0	0	enrich
NEOPLASM_C73	1.68448	329	98833	0.33	1921	972073	0.2	0	0	enrich
NEOPLASM_C77	1.95078	239	98833	0.24	1205	972073	0.12	0	0	enrich
NEOPLASM_C80	1.5942	289	98833	0.29	1783	972073	0.18	2.44249e-15	6.59992e-15	enrich
NEOPLASM_C81	1.37049	351	98833	0.36	2519	972073	0.26	1.3778e-09	1.73248e-09	enrich
NEOPLASM_C82	1.60035	288	98833	0.29	1770	972073	0.18	1.77636e-15	5.01327e-15	enrich
NEOPLASM_C83	1.61815	230	98833	0.23	1398	972073	0.14	3.32512e-13	6.21015e-13	enrich
NEOPLASM_D04	1.45566	222	98833	0.22	1500	972073	0.15	1.21948e-08	1.40794e-08	enrich
NEOPLASM_D05	1.74969	235	98833	0.24	1321	972073	0.14	0	0	enrich
NEOPLASM_D07	1.52142	269	98833	0.27	1739	972073	0.18	4.17333e-12	6.85505e-12	enrich
NEOPLASM_D09	1.51559	431	98833	0.44	2797	972073	0.29	0	0	enrich
NEOPLASM_D11	1.35956	239	98833	0.24	1729	972073	0.18	8.95803e-07	9.40223e-07	enrich
NEOPLASM_D12	1.49107	161	98833	0.16	1062	972073	0.11	2.46316e-07	2.69673e-07	enrich
NEOPLASM_D13	1.85705	270	98833	0.27	1430	972073	0.15	0	0	enrich
NEOPLASM_D14	1.58227	361	98833	0.37	2244	972073	0.23	0	0	enrich
NEOPLASM_D16	1.49848	330	98833	0.33	2166	972073	0.22	1.29452e-13	2.52929e-13	enrich
NEOPLASM_D17	1.81227	206	98833	0.21	1118	972073	0.12	0	0	enrich
NEOPLASM_D18	1.70775	241	98833	0.24	1388	972073	0.14	2.22045e-16	7.04992e-16	enrich
NEOPLASM_D21	1.76307	318	98833	0.32	1774	972073	0.18	0	0	enrich
NEOPLASM_D22	1.65466	179	98833	0.18	1064	972073	0.11	1.95077e-11	2.94938e-11	enrich
NEOPLASM_D23	1.59801	155	98833	0.16	954	972073	0.1	4.67687e-09	5.60342e-09	enrich
NEOPLASM_D24	1.8367	231	98833	0.23	1237	972073	0.13	0	0	enrich
NEOPLASM_D35	1.79953	247	98833	0.25	1350	972073	0.14	0	0	enrich
NEOPLASM_D37	1.81134	207	98833	0.21	1124	972073	0.12	0	0	enrich
NEOPLASM_D38	1.22307	384	98833	0.39	3088	972073	0.32	2.77855e-05	2.823e-05	enrich
NEOPLASM_D41	1.71355	246	98833	0.25	1412	972073	0.15	0	0	enrich
NEOPLASM_D43	1.25902	431	98833	0.44	3367	972073	0.35	5.54274e-07	5.91537e-07	enrich
NEOPLASM_D45	1.51615	312	98833	0.32	2024	972073	0.21	1.38112e-13	2.6576e-13	enrich
NEOPLASM_D46	1.48974	372	98833	0.38	2456	972073	0.25	9.10383e-15	2.22344e-14	enrich
NEOPLASM_D48	1.6875	239	98833	0.24	1393	972073	0.14	1.11022e-15	3.27903e-15	enrich
RESPIRATORY_J20	1.33768	465	98833	0.47	3419	972073	0.35	1.11025e-10	1.53262e-10	enrich
RESPIRATORY_J22	1.88655	178	98833	0.18	928	972073	0.1	2.22045e-16	7.04992e-16	enrich
RESPIRATORY_J40	1.3873	290	98833	0.29	2056	972073	0.21	1.07641e-08	1.25417e-08	enrich
RESPIRATORY_J44	1.76158	192	98833	0.19	1072	972073	0.11	1.07692e-14	2.44892e-14	enrich
RESPIRATORY_J47	1.49799	228	98833	0.23	1497	972073	0.15	6.63923e-10	8.517e-10	enrich
RESPIRATORY_J84	1.66069	297	98833	0.3	1759	972073	0.18	0	0	enrich
LONGEVITY GWAS
trait	FC	Number Target Regions w/nearby Thresholded SNP(s)	Total # of Target Regions	% Targets	Number Background Regions w/nearby Thresholded SNP(s)	Total # of Background Regions	% Background	Hypergeometric test p-value	Hypergeometric test adjusted p-value	Direction
father_age	0.809983	49	98833	0.05	595	972073	0.06	0.0646684	0.258674	depleted
lifegen_age	1.15538	78	98833	0.08	664	972073	0.07	0.101445	0.13526	enrich
mother_age	1.56616	50	98833	0.05	314	972073	0.03	0.00101088	0.00260285	enrich
combo_age	1.42132	75	98833	0.08	519	972073	0.05	0.00130143	0.00260285	enrich

## Sheet: SNP Enrich-Hypergeo-OLDBIAS
trait	FC	Number Target Regions w/nearby Thresholded SNP(s)	Total # of Target Regions	% Targets	Number Background Regions w/nearby Thresholded SNP(s)	Total # of Background Regions	% Background	Hypergeometric test p-value	Hypergeometric test adjusted p-value	Direction
BLOOD_D63	0.716736	202	113489	0.18	2414	972073	0.25	7.1898e-08	1.2682e-07	depleted
BLOOD_D64	0.616446	76	113489	0.07	1056	972073	0.11	9.17355e-07	1.38695e-06	depleted
CV_I08	0.713027	158	113489	0.14	1898	972073	0.2	1.19406e-06	1.74305e-06	depleted
CV_I10	0.548621	80	113489	0.07	1249	972073	0.13	2.51439e-10	8.3584e-10	depleted
CV_I12	0.616343	136	113489	0.12	1890	972073	0.19	6.4944e-11	2.98809e-10	depleted
CV_I20	0.70151	81	113489	0.07	989	972073	0.1	0.000218576	0.000237257	depleted
CV_I21	0.757869	106	113489	0.09	1198	972073	0.12	0.000942872	0.000989626	depleted
CV_I22	0.666519	114	113489	0.1	1465	972073	0.15	6.13829e-07	9.62423e-07	depleted
CV_I24	0.646553	109	113489	0.1	1444	972073	0.15	1.47466e-07	2.4633e-07	depleted
CV_I25	0.78905	152	113489	0.13	1650	972073	0.17	0.000758055	0.000802274	depleted
CV_I26	0.59266	84	113489	0.07	1214	972073	0.12	2.20869e-08	4.25005e-08	depleted
CV_I27	0.784709	248	113489	0.22	2707	972073	0.28	1.46906e-05	1.81137e-05	depleted
CV_I30	0.841508	252	113489	0.22	2565	972073	0.26	0.00157029	0.00163464	depleted
CV_I31	0.678212	116	113489	0.1	1465	972073	0.15	1.51537e-06	2.13835e-06	depleted
CV_I33	0.760179	228	113489	0.2	2569	972073	0.26	2.6157e-06	3.53036e-06	depleted
CV_I34	0.670535	115	113489	0.1	1469	972073	0.15	8.13073e-07	1.2441e-06	depleted
CV_I35	0.550384	80	113489	0.07	1245	972073	0.13	3.18133e-10	9.61974e-10	depleted
CV_I42	0.575675	99	113489	0.09	1473	972073	0.15	1.31832e-10	4.78362e-10	depleted
CV_I44	0.645288	95	113489	0.08	1261	972073	0.13	7.89114e-07	1.22216e-06	depleted
CV_I46	0.760881	210	113489	0.19	2364	972073	0.24	6.73195e-06	8.63594e-06	depleted
CV_I47	0.495744	72	113489	0.06	1244	972073	0.13	1.09058e-12	1.06541e-11	depleted
CV_I48	0.620742	139	113489	0.12	1918	972073	0.2	8.02199e-11	3.51308e-10	depleted
CV_I50	0.520222	71	113489	0.06	1169	972073	0.12	6.22897e-11	2.98809e-10	depleted
CV_I51	0.730612	170	113489	0.15	1993	972073	0.21	3.04769e-06	4.03183e-06	depleted
CV_I61	0.56301	89	113489	0.08	1354	972073	0.14	2.026e-10	6.95411e-10	depleted
CV_I63	0.433908	50	113489	0.04	987	972073	0.1	5.48079e-13	6.96061e-12	depleted
CV_I64	0.524838	75	113489	0.07	1224	972073	0.13	3.6141e-11	2.08632e-10	depleted
CV_I65	0.598107	106	113489	0.09	1518	972073	0.16	7.42069e-10	1.92332e-09	depleted
CV_I70	0.504577	81	113489	0.07	1375	972073	0.14	2.16636e-13	3.43909e-12	depleted
CV_I71	0.590714	98	113489	0.09	1421	972073	0.15	1.23582e-09	3.01825e-09	depleted
CV_I73	0.553911	82	113489	0.07	1268	972073	0.13	3.10259e-10	9.61046e-10	depleted
CV_I74	0.59712	90	113489	0.08	1291	972073	0.13	1.19735e-08	2.45264e-08	depleted
CV_I78	0.709949	139	113489	0.12	1677	972073	0.17	3.7617e-06	4.92511e-06	depleted
CV_I80	0.490206	74	113489	0.07	1293	972073	0.13	2.07235e-13	3.43909e-12	depleted
CV_I82	0.782144	225	113489	0.2	2464	972073	0.25	2.76863e-05	3.19651e-05	depleted
CV_I83	0.600297	108	113489	0.1	1541	972073	0.16	6.95882e-10	1.84119e-09	depleted
CV_I84	0.469334	44	113489	0.04	803	972073	0.08	1.3727e-09	3.28887e-09	depleted
CV_I85	0.605942	118	113489	0.1	1668	972073	0.17	2.66636e-10	8.46568e-10	depleted
CV_I86	0.723566	191	113489	0.17	2261	972073	0.23	3.56442e-07	5.65851e-07	depleted
CV_I95	0.546309	84	113489	0.07	1317	972073	0.14	6.58792e-11	2.98809e-10	depleted
DIABETES_E10	0.758874	237	113489	0.21	2675	972073	0.28	1.45679e-06	2.07879e-06	depleted
DIABETES_E11	0.535715	88	113489	0.08	1407	972073	0.14	4.62099e-12	3.91244e-11	depleted
DIABETES_N17	0.484706	73	113489	0.06	1290	972073	0.13	1.14733e-13	2.42852e-12	depleted
DIABETES_N18	0.654298	99	113489	0.09	1296	972073	0.13	1.09222e-06	1.61292e-06	depleted
DIABETES_N19	0.750406	210	113489	0.19	2397	972073	0.25	2.2629e-06	3.0902e-06	depleted
DIABETES_N20	0.523239	73	113489	0.06	1195	972073	0.12	5.21122e-11	2.7576e-10	depleted
DIABETES_N28	0.690309	125	113489	0.11	1551	972073	0.16	1.97453e-06	2.75567e-06	depleted
DIGESTIVE_K25	0.495853	73	113489	0.06	1261	972073	0.13	7.77804e-13	8.23176e-12	depleted
DIGESTIVE_K26	0.532773	78	113489	0.07	1254	972073	0.13	4.76332e-11	2.63018e-10	depleted
DIGESTIVE_K29	0.551557	34	113489	0.03	528	972073	0.05	3.82673e-05	4.37833e-05	depleted
DIGESTIVE_K76	0.589021	96	113489	0.08	1396	972073	0.14	1.458e-09	3.36665e-09	depleted
DIGESTIVE_K85	0.548731	64	113489	0.06	999	972073	0.1	1.47387e-08	2.97112e-08	depleted
METABOLIC_E83	0.829684	309	113489	0.27	3190	972073	0.33	0.000185607	0.000203207	depleted
METABOLIC_E23	0.765974	192	113489	0.17	2147	972073	0.22	2.55579e-05	2.97785e-05	depleted
METABOLIC_E03	0.948492	328	113489	0.29	2962	972073	0.3	0.160589	0.160589	depleted
METABOLIC_E87	0.635942	96	113489	0.08	1293	972073	0.13	2.83609e-07	4.55928e-07	depleted
MUSCULOSKELETAL_M00	0.635816	140	113489	0.12	1886	972073	0.19	6.4589e-10	1.78322e-09	depleted
MUSCULOSKELETAL_M05	0.782373	192	113489	0.17	2102	972073	0.22	0.00010267	0.000116421	depleted
MUSCULOSKELETAL_M06	0.740998	152	113489	0.13	1757	972073	0.18	2.37702e-05	2.7952e-05	depleted
MUSCULOSKELETAL_M13	0.553073	76	113489	0.07	1177	972073	0.12	1.21272e-09	3.01825e-09	depleted
MUSCULOSKELETAL_M10	0.717295	153	113489	0.13	1827	972073	0.19	2.64082e-06	3.53036e-06	depleted
MUSCULOSKELETAL_M15	0.49004	71	113489	0.06	1241	972073	0.13	6.09539e-13	7.0374e-12	depleted
MUSCULOSKELETAL_M16	0.567172	108	113489	0.1	1631	972073	0.17	5.15222e-12	3.99517e-11	depleted
MUSCULOSKELETAL_M17	0.573967	65	113489	0.06	970	972073	0.1	1.4935e-07	2.4633e-07	depleted
MUSCULOSKELETAL_M18	0.693994	114	113489	0.1	1407	972073	0.14	7.35041e-06	9.2426e-06	depleted
MUSCULOSKELETAL_M19	0.454488	52	113489	0.05	980	972073	0.1	5.34787e-12	3.99517e-11	depleted
MUSCULOSKELETAL_M45	0.821256	284	113489	0.25	2962	972073	0.3	0.000156963	0.000173342	depleted
MUSCULOSKELETAL_M46	0.773354	172	113489	0.15	1905	972073	0.2	0.000115173	0.000128307	depleted
MUSCULOSKELETAL_M47	0.574599	75	113489	0.07	1118	972073	0.12	1.86653e-08	3.70389e-08	depleted
MUSCULOSKELETAL_M48	0.641979	76	113489	0.07	1014	972073	0.1	7.29855e-06	9.2426e-06	depleted
MUSCULOSKELETAL_M65	0.478556	59	113489	0.05	1056	972073	0.11	9.87197e-12	6.2687e-11	depleted
MUSCULOSKELETAL_M67	0.596042	81	113489	0.07	1164	972073	0.12	5.54577e-08	1.00616e-07	depleted
MUSCULOSKELETAL_M80	0.887401	230	113489	0.2	2220	972073	0.23	0.0273531	0.0277907	depleted
MUSCULOSKELETAL_M81	0.56351	75	113489	0.07	1140	972073	0.12	5.38114e-09	1.15831e-08	depleted
NEOPLASM_C01	0.784873	299	113489	0.26	3263	972073	0.34	2.19121e-06	3.02483e-06	depleted
NEOPLASM_C02	0.927942	269	113489	0.24	2483	972073	0.26	0.100079	0.100873	depleted
NEOPLASM_C09	0.739768	204	113489	0.18	2362	972073	0.24	9.8693e-07	1.47459e-06	depleted
NEOPLASM_C15	0.523328	79	113489	0.07	1293	972073	0.13	8.80455e-12	6.2121e-11	depleted
NEOPLASM_C18	0.495744	54	113489	0.05	933	972073	0.1	6.7455e-10	1.82272e-09	depleted
NEOPLASM_C20	0.521708	67	113489	0.06	1100	972073	0.11	2.56675e-10	8.3584e-10	depleted
NEOPLASM_C25	0.615601	116	113489	0.1	1614	972073	0.17	1.39842e-09	3.28887e-09	depleted
NEOPLASM_C34	0.695477	76	113489	0.07	936	972073	0.1	0.00024014	0.000258456	depleted
NEOPLASM_C43	0.512562	83	113489	0.07	1387	972073	0.14	4.47997e-13	6.32173e-12	depleted
NEOPLASM_C44	0.776091	219	113489	0.19	2417	972073	0.25	1.991e-05	2.38544e-05	depleted
NEOPLASM_C45	0.704765	215	113489	0.19	2613	972073	0.27	5.24766e-09	1.14906e-08	depleted
NEOPLASM_C48	0.779244	246	113489	0.22	2704	972073	0.28	9.06146e-06	1.12824e-05	depleted
NEOPLASM_C49	0.661121	181	113489	0.16	2345	972073	0.24	1.75782e-10	6.20119e-10	depleted
NEOPLASM_C50	0.546444	83	113489	0.07	1301	972073	0.13	8.67947e-11	3.67431e-10	depleted
NEOPLASM_C64	0.487937	83	113489	0.07	1457	972073	0.15	4.81982e-15	3.06059e-13	depleted
NEOPLASM_C67	0.602312	77	113489	0.07	1095	972073	0.11	2.13375e-07	3.47419e-07	depleted
NEOPLASM_C69	0.709313	225	113489	0.2	2717	972073	0.28	4.68155e-09	1.04308e-08	depleted
NEOPLASM_C71	0.604508	136	113489	0.12	1927	972073	0.2	9.81132e-12	6.2687e-11	depleted
NEOPLASM_C73	0.597479	134	113489	0.12	1921	972073	0.2	4.30787e-12	3.90785e-11	depleted
NEOPLASM_C77	0.362517	51	113489	0.04	1205	972073	0.12	6.93955e-20	8.81322e-18	depleted
NEOPLASM_C80	0.638918	133	113489	0.12	1783	972073	0.18	2.56328e-09	5.81315e-09	depleted
NEOPLASM_C81	0.765067	225	113489	0.2	2519	972073	0.26	5.09031e-06	6.59662e-06	depleted
NEOPLASM_C82	0.662968	137	113489	0.12	1770	972073	0.18	3.2422e-08	6.05529e-08	depleted
NEOPLASM_C83	0.557544	91	113489	0.08	1398	972073	0.14	5.87047e-11	2.9822e-10	depleted
NEOPLASM_D04	0.713779	125	113489	0.11	1500	972073	0.15	1.5249e-05	1.86214e-05	depleted
NEOPLASM_D05	0.661367	102	113489	0.09	1321	972073	0.14	1.45624e-06	2.07879e-06	depleted
NEOPLASM_D07	0.664935	135	113489	0.12	1739	972073	0.18	5.10913e-08	9.40376e-08	depleted
NEOPLASM_D09	0.790082	258	113489	0.23	2797	972073	0.29	1.75325e-05	2.1206e-05	depleted
NEOPLASM_D11	0.544933	110	113489	0.1	1729	972073	0.18	6.54429e-14	1.69596e-12	depleted
NEOPLASM_D12	0.66942	83	113489	0.07	1062	972073	0.11	2.32482e-05	2.75936e-05	depleted
NEOPLASM_D13	0.586996	98	113489	0.09	1430	972073	0.15	7.60653e-10	1.93206e-09	depleted
NEOPLASM_D14	0.709962	186	113489	0.16	2244	972073	0.23	1.01373e-07	1.71659e-07	depleted
NEOPLASM_D16	0.703893	178	113489	0.16	2166	972073	0.22	9.0707e-08	1.57805e-07	depleted
NEOPLASM_D17	0.429034	56	113489	0.05	1118	972073	0.12	9.2285e-15	3.90673e-13	depleted
NEOPLASM_D18	0.561561	91	113489	0.08	1388	972073	0.14	1.04339e-10	4.14095e-10	depleted
NEOPLASM_D21	0.550423	114	113489	0.1	1774	972073	0.18	6.67702e-14	1.69596e-12	depleted
NEOPLASM_D22	0.55546	69	113489	0.06	1064	972073	0.11	8.89493e-09	1.8519e-08	depleted
NEOPLASM_D23	0.457896	51	113489	0.04	954	972073	0.1	1.40656e-11	8.50631e-11	depleted
NEOPLASM_D24	0.553943	80	113489	0.07	1237	972073	0.13	5.07985e-10	1.43365e-09	depleted
NEOPLASM_D35	0.571023	90	113489	0.08	1350	972073	0.14	4.77946e-10	1.37953e-09	depleted
NEOPLASM_D37	0.518188	68	113489	0.06	1124	972073	0.12	1.1813e-10	4.44498e-10	depleted
NEOPLASM_D38	0.868185	313	113489	0.28	3088	972073	0.32	0.00363047	0.00374854	depleted
NEOPLASM_D41	0.564148	93	113489	0.08	1412	972073	0.15	9.51634e-11	3.89863e-10	depleted
NEOPLASM_D43	0.882737	347	113489	0.31	3367	972073	0.35	0.00643353	0.00658918	depleted
NEOPLASM_D45	0.689798	163	113489	0.14	2024	972073	0.21	5.91925e-08	1.0588e-07	depleted
NEOPLASM_D46	0.721917	207	113489	0.18	2456	972073	0.25	9.75037e-08	1.67337e-07	depleted
NEOPLASM_D48	0.621034	101	113489	0.09	1393	972073	0.14	2.85144e-08	5.40497e-08	depleted
RESPIRATORY_J20	0.829228	331	113489	0.29	3419	972073	0.35	0.00010844	0.000121875	depleted
RESPIRATORY_J22	0.489185	53	113489	0.05	928	972073	0.1	4.29443e-10	1.26836e-09	depleted
RESPIRATORY_J40	0.808209	194	113489	0.17	2056	972073	0.21	0.000651663	0.000695472	depleted
RESPIRATORY_J44	0.567295	71	113489	0.06	1072	972073	0.11	2.03562e-08	3.97728e-08	depleted
RESPIRATORY_J47	0.577889	101	113489	0.09	1497	972073	0.15	1.19e-10	4.44498e-10	depleted
RESPIRATORY_J84	0.647636	133	113489	0.12	1759	972073	0.18	7.93784e-09	1.68018e-08	depleted
LONGEVITY GWAS
trait	FC	Number Target Regions w/nearby Thresholded SNP(s)	Total # of Target Regions	% Targets	Number Background Regions w/nearby Thresholded SNP(s)	Total # of Background Regions	% Background	Hypergeometric test p-value	Hypergeometric test adjusted p-value	Direction
father_age	1.09406	76	113489	0.07	595	972073	0.06	0.218499	0.605839	enrich
lifegen_age	1.00617	78	113489	0.07	664	972073	0.07	0.49488	0.658511	enrich
mother_age	1.09113	40	113489	0.04	314	972073	0.03	0.30292	0.605839	enrich
combo_age	0.957207	58	113489	0.05	519	972073	0.05	0.393581	0.81638	depleted

## Sheet: SNP Enrich - Intersects
ADULT-BIASED Region Intersects:														FETAL-BIASED Region Intersects:
ADULT-BIASED – YOUNG-BIASED							ADULT-BIASED – OLD-BIASED							FETAL-BIASED – YOUNG-BIASED							FETAL-BIASED – OLD-BIASED
Trait	FC	% Target	% Background	Hypergeometric adjusted p-value			Trait	FC	% Target	% Background	Hypergeometric adjusted p-value			Trait	FC	% Target	% Background	Hypergeometric adjusted p-value			Trait	FC	% Target	% Background	Hypergeometric adjusted p-value
BLOOD_D63	1.88889	0.51	0.27	8.77224e-12			BLOOD_D63	0.62963	0.17	0.27	1.1948e-13			BLOOD_D63	1.16667	0.28	0.24	0.0040342			BLOOD_D63	1.08333	0.26	0.24	0.704262
BLOOD_D64	2.75	0.33	0.12	5.32069e-16			BLOOD_D64	0.583333	0.07	0.12	1.14834e-10			BLOOD_D64	1.5	0.15	0.1	5.44571e-06			BLOOD_D64	0.7	0.07	0.1	0.270864
CV_I08	1.90909	0.42	0.22	1.10475e-10			CV_I08	0.636364	0.14	0.22	7.21297e-11			CV_I08	1.31579	0.25	0.19	0.000184613			CV_I08	0.631579	0.12	0.19	0.119116
CV_I10	2.33333	0.35	0.15	7.59073e-14			CV_I10	0.533333	0.08	0.15	7.99862e-14			CV_I10	1.41667	0.17	0.12	1.88891e-05			CV_I10	0.0833333	0.01	0.12	0.00576763
CV_I12	2.04545	0.45	0.22	3.26403e-12			CV_I12	0.545455	0.12	0.22	2.03473e-17			CV_I12	1.22222	0.22	0.18	0.000629527			CV_I12	0.722222	0.13	0.18	0.248518
CV_I20	2.58333	0.31	0.12	1.04415e-13			CV_I20	0.583333	0.07	0.12	1.26401e-08			CV_I20	1.44444	0.13	0.09	0.000124698			CV_I20	0.555556	0.05	0.09	0.205222
CV_I21	2.33333	0.35	0.15	1.75987e-13			CV_I21	0.6	0.09	0.15	4.43206e-08			CV_I21	1.3	0.13	0.1	0.023208			CV_I21	0.9	0.09	0.1	0.431697
CV_I22	2.05882	0.35	0.17	1.70245e-10			CV_I22	0.588235	0.1	0.17	8.72318e-12			CV_I22	1.53333	0.23	0.15	3.84455e-08			CV_I22	0.666667	0.1	0.15	0.206211
CV_I24	2.5	0.45	0.18	0			CV_I24	0.555556	0.1	0.18	5.79889e-13			CV_I24	1.30769	0.17	0.13	0.000511427			CV_I24	0.538462	0.07	0.13	0.115453
CV_I25	1.41176	0.24	0.17	0.00604789			CV_I25	0.764706	0.13	0.17	0.000185136			CV_I25	0.9375	0.15	0.16	0.727482			CV_I25	0.8125	0.13	0.16	0.330541
CV_I26	2.13333	0.32	0.15	7.2972e-11			CV_I26	0.533333	0.08	0.15	1.74635e-12			CV_I26	1.30769	0.17	0.13	4.86612e-05			CV_I26	0.384615	0.05	0.13	0.091175
CV_I27	1.80645	0.56	0.31	6.15341e-12			CV_I27	0.709677	0.22	0.31	7.03061e-09			CV_I27	1.2	0.3	0.25	0.000940674			CV_I27	0.64	0.16	0.25	0.113969
CV_I30	2	0.6	0.3	2.72102e-15			CV_I30	0.733333	0.22	0.3	4.31415e-09			CV_I30	1.08	0.27	0.25	0.0502669			CV_I30	1	0.25	0.25	0.588215
CV_I31	2.23529	0.38	0.17	1.78827e-13			CV_I31	0.588235	0.1	0.17	9.68484e-11			CV_I31	1.42857	0.2	0.14	1.50375e-05			CV_I31	0.642857	0.09	0.14	0.18013
CV_I33	2	0.6	0.3	1.2818e-15			CV_I33	0.666667	0.2	0.3	4.00957e-12			CV_I33	1.25	0.3	0.24	0.000345514			CV_I33	0.708333	0.17	0.24	0.167161
CV_I34	2.17647	0.37	0.17	2.09164e-11			CV_I34	0.588235	0.1	0.17	1.13641e-11			CV_I34	1.21429	0.17	0.14	0.00705974			CV_I34	0.714286	0.1	0.14	0.239073
CV_I35	2.35714	0.33	0.14	1.52929e-13			CV_I35	0.5	0.07	0.14	4.99664e-12			CV_I35	1.23077	0.16	0.13	0.0178657			CV_I35	0.538462	0.07	0.13	0.115453
CV_I42	2.5	0.45	0.18	0			CV_I42	0.5	0.09	0.18	2.56722e-16			CV_I42	1.26667	0.19	0.15	0.000406303			CV_I42	0.533333	0.08	0.15	0.115453
CV_I44	2	0.32	0.16	2.23313e-09			CV_I44	0.5	0.08	0.16	2.69188e-14			CV_I44	1.25	0.15	0.12	0.0027343			CV_I44	1.08333	0.13	0.12	0.676106
CV_I46	2.03704	0.55	0.27	2.91721e-15			CV_I46	0.703704	0.19	0.27	4.89879e-10			CV_I46	1.16667	0.28	0.24	0.00159743			CV_I46	0.75	0.18	0.24	0.22915
CV_I47	2.75	0.44	0.16	0			CV_I47	0.375	0.06	0.16	6.88133e-21			CV_I47	1.33333	0.16	0.12	0.000292499			CV_I47	0.666667	0.08	0.12	0.239073
CV_I48	2.23529	0.38	0.17	1.19106e-13			CV_I48	0.647059	0.11	0.17	1.74594e-08			CV_I48	1.12	0.28	0.25	0.0648804			CV_I48	0.96	0.24	0.25	0.472008
CV_I50	3	0.42	0.14	0			CV_I50	0.428571	0.06	0.14	1.48162e-16			CV_I50	1.45455	0.16	0.11	3.63803e-06			CV_I50	0.727273	0.08	0.11	0.291876
CV_I51	2.34783	0.54	0.23	0			CV_I51	0.652174	0.15	0.23	8.74025e-12			CV_I51	1.28571	0.27	0.21	1.98399e-05			CV_I51	0.761905	0.16	0.21	0.248518
CV_I61	2.3125	0.37	0.16	1.44294e-13			CV_I61	0.5	0.08	0.16	5.29494e-17			CV_I61	1.23077	0.16	0.13	0.00948609			CV_I61	0.846154	0.11	0.13	0.394955
CV_I63	3.08333	0.37	0.12	0			CV_I63	0.333333	0.04	0.12	5.86533e-19			CV_I63	1.22222	0.11	0.09	0.067476			CV_I63	0.444444	0.04	0.09	0.119116
CV_I64	2.46667	0.37	0.15	5.32069e-16			CV_I64	0.466667	0.07	0.15	4.56059e-16			CV_I64	1.33333	0.16	0.12	0.000940674			CV_I64	0.25	0.03	0.12	0.0323174
CV_I65	1.94737	0.37	0.19	3.10226e-10			CV_I65	0.473684	0.09	0.19	4.5351e-17			CV_I65	1.13333	0.17	0.15	0.0174137			CV_I65	0.666667	0.1	0.15	0.22915
CV_I70	2.82353	0.48	0.17	0			CV_I70	0.411765	0.07	0.17	6.07657e-20			CV_I70	1.30769	0.17	0.13	0.000395392			CV_I70	0.384615	0.05	0.13	0.0725059
CV_I71	2.47059	0.42	0.17	0			CV_I71	0.529412	0.09	0.17	9.76079e-15			CV_I71	1.42857	0.2	0.14	1.69166e-05			CV_I71	0.357143	0.05	0.14	0.0383754
CV_I73	2.26667	0.34	0.15	2.12286e-12			CV_I73	0.466667	0.07	0.15	5.78783e-17			CV_I73	1.38462	0.18	0.13	1.01677e-05			CV_I73	0.846154	0.11	0.13	0.429413
CV_I74	2.5	0.4	0.16	0			CV_I74	0.5	0.08	0.16	3.73421e-15			CV_I74	1.27273	0.14	0.11	0.0141545			CV_I74	0.545455	0.06	0.11	0.134554
CV_I78	1.95	0.39	0.2	1.37857e-10			CV_I78	0.65	0.13	0.2	2.60783e-10			CV_I78	1.3125	0.21	0.16	0.000157143			CV_I78	0.5	0.08	0.16	0.101187
CV_I80	2.8	0.42	0.15	0			CV_I80	0.4	0.06	0.15	7.64337e-19			CV_I80	1.42857	0.2	0.14	6.78456e-06			CV_I80	0.785714	0.11	0.14	0.305285
CV_I82	1.93103	0.56	0.29	2.48821e-14			CV_I82	0.724138	0.21	0.29	7.01512e-09			CV_I82	1.26087	0.29	0.23	0.000184613			CV_I82	0.565217	0.13	0.23	0.091175
CV_I83	2.46667	0.37	0.15	8.37178e-15			CV_I83	0.6	0.09	0.15	3.98288e-09			CV_I83	1.29412	0.22	0.17	0.000150377			CV_I83	0.588235	0.1	0.17	0.115453
CV_I84	2.3	0.23	0.1	5.20271e-09			CV_I84	0.4	0.04	0.1	1.06543e-14			CV_I84	1.42857	0.1	0.07	0.00104757			CV_I84	0.571429	0.04	0.07	0.239073
CV_I85	2.35	0.47	0.2	0			CV_I85	0.5	0.1	0.2	7.21562e-16			CV_I85	1.1875	0.19	0.16	0.0289677			CV_I85	0.6875	0.11	0.16	0.215442
CV_I86	2.03846	0.53	0.26	2.68095e-14			CV_I86	0.615385	0.16	0.26	3.92213e-14			CV_I86	1.18182	0.26	0.22	0.00192606			CV_I86	1	0.22	0.22	0.578861
CV_I95	2.375	0.38	0.16	4.6229e-15			CV_I95	0.4375	0.07	0.16	3.9568e-18			CV_I95	1.38462	0.18	0.13	0.00019599			CV_I95	0.846154	0.11	0.13	0.362834
DIABETES_E10	2.1875	0.7	0.32	0			DIABETES_E10	0.65625	0.21	0.32	9.99688e-15			DIABETES_E10	1.48	0.37	0.25	4.83342e-11			DIABETES_E10	0.96	0.24	0.25	0.468769
DIABETES_E11	2.5	0.4	0.16	5.32069e-16			DIABETES_E11	0.5	0.08	0.16	1.94187e-17			DIABETES_E11	1.35714	0.19	0.14	3.97383e-05			DIABETES_E11	0.714286	0.1	0.14	0.248518
DIABETES_N17	2.73333	0.41	0.15	0			DIABETES_N17	0.4	0.06	0.15	4.5909e-18			DIABETES_N17	1.28571	0.18	0.14	0.000777797			DIABETES_N17	0.5	0.07	0.14	0.113969
DIABETES_N18	2.23529	0.38	0.17	4.73911e-14			DIABETES_N18	0.529412	0.09	0.17	3.04771e-13			DIABETES_N18	1.33333	0.16	0.12	0.000291286			DIABETES_N18	0.5	0.06	0.12	0.119116
DIABETES_N19	1.78571	0.5	0.28	6.45045e-10			DIABETES_N19	0.642857	0.18	0.28	1.07803e-12			DIABETES_N19	1.26087	0.29	0.23	0.000118327			DIABETES_N19	0.913043	0.21	0.23	0.403827
DIABETES_N20	2.71429	0.38	0.14	0			DIABETES_N20	0.428571	0.06	0.14	8.91727e-17			DIABETES_N20	1.63636	0.18	0.11	3.73071e-08			DIABETES_N20	0.818182	0.09	0.11	0.35247
DIABETES_N28	2.05556	0.37	0.18	9.57087e-11			DIABETES_N28	0.611111	0.11	0.18	1.19234e-09			DIABETES_N28	1.26667	0.19	0.15	0.000948229			DIABETES_N28	0.533333	0.08	0.15	0.113969
DIGESTIVE_K25	3	0.48	0.16	0			DIGESTIVE_K25	0.375	0.06	0.16	6.88133e-21			DIGESTIVE_K25	1.41667	0.17	0.12	3.63803e-06			DIGESTIVE_K25	0.75	0.09	0.12	0.32199
DIGESTIVE_K26	2.13333	0.32	0.15	1.27056e-10			DIGESTIVE_K26	0.466667	0.07	0.15	3.05188e-16			DIGESTIVE_K26	1.15385	0.15	0.13	0.00772431			DIGESTIVE_K26	0.384615	0.05	0.13	0.091175
DIGESTIVE_K29	2.16667	0.13	0.06	5.15988e-06			DIGESTIVE_K29	0.5	0.03	0.06	3.97088e-07			DIGESTIVE_K29	1.5	0.09	0.06	0.000384124			DIGESTIVE_K29	0.833333	0.05	0.06	0.478832
DIGESTIVE_K76	2.11765	0.36	0.17	2.78242e-12			DIGESTIVE_K76	0.470588	0.08	0.17	5.69223e-15			DIGESTIVE_K76	1.30769	0.17	0.13	0.000306761			DIGESTIVE_K76	0.692308	0.09	0.13	0.239073
DIGESTIVE_K85	2.15385	0.28	0.13	4.96916e-10			DIGESTIVE_K85	0.461538	0.06	0.13	4.92483e-15			DIGESTIVE_K85	1.55556	0.14	0.09	1.50375e-05			DIGESTIVE_K85	0.555556	0.05	0.09	0.186209
METABOLIC_E83	1.65714	0.58	0.35	1.90052e-09			METABOLIC_E83	0.771429	0.27	0.35	7.06258e-08			METABOLIC_E83	1.28571	0.45	0.35	1.66567e-06			METABOLIC_E83	0.828571	0.29	0.35	0.270864
METABOLIC_E23	1.8	0.45	0.25	5.96565e-10			METABOLIC_E23	0.68	0.17	0.25	1.17597e-09			METABOLIC_E23	1.09091	0.24	0.22	0.0794796			METABOLIC_E23	0.818182	0.18	0.22	0.291876
METABOLIC_E03	1.58824	0.54	0.34	4.94409e-08			METABOLIC_E03	0.852941	0.29	0.34	0.000419667			METABOLIC_E03	1.14286	0.32	0.28	0.0165361			METABOLIC_E03	1.10714	0.31	0.28	0.793175
METABOLIC_E87	2.375	0.38	0.16	2.81997e-16			METABOLIC_E87	0.5625	0.09	0.16	1.58956e-11			METABOLIC_E87	1.30769	0.17	0.13	0.000242684			METABOLIC_E87	0.461538	0.06	0.13	0.111499
MUSCULOSKELETAL_M00	2.71429	0.57	0.21	0			MUSCULOSKELETAL_M00	0.571429	0.12	0.21	3.35407e-14			MUSCULOSKELETAL_M00	1.2	0.24	0.2	0.00192606			MUSCULOSKELETAL_M00	0.75	0.15	0.2	0.24922
MUSCULOSKELETAL_M05	1.72	0.43	0.25	6.43916e-09			MUSCULOSKELETAL_M05	0.68	0.17	0.25	2.43111e-09			MUSCULOSKELETAL_M05	1.27273	0.28	0.22	0.000113367			MUSCULOSKELETAL_M05	0.772727	0.17	0.22	0.239073
MUSCULOSKELETAL_M06	2.22727	0.49	0.22	0			MUSCULOSKELETAL_M06	0.590909	0.13	0.22	6.38095e-13			MUSCULOSKELETAL_M06	1.4375	0.23	0.16	3.64975e-08			MUSCULOSKELETAL_M06	0.8125	0.13	0.16	0.344588
MUSCULOSKELETAL_M13	2.5	0.35	0.14	2.29385e-14			MUSCULOSKELETAL_M13	0.5	0.07	0.14	1.90254e-14			MUSCULOSKELETAL_M13	1.5	0.18	0.12	3.84455e-08			MUSCULOSKELETAL_M13	0.25	0.03	0.12	0.033705
MUSCULOSKELETAL_M10	1.95238	0.41	0.21	7.67659e-11			MUSCULOSKELETAL_M10	0.666667	0.14	0.21	6.13447e-10			MUSCULOSKELETAL_M10	1.33333	0.24	0.18	0.00027006			MUSCULOSKELETAL_M10	0.611111	0.11	0.18	0.115453
MUSCULOSKELETAL_M15	2.53333	0.38	0.15	0			MUSCULOSKELETAL_M15	0.466667	0.07	0.15	5.48942e-16			MUSCULOSKELETAL_M15	1.33333	0.16	0.12	0.000265418			MUSCULOSKELETAL_M15	0.166667	0.02	0.12	0.0134766
MUSCULOSKELETAL_M16	1.83333	0.33	0.18	8.66315e-08			MUSCULOSKELETAL_M16	0.555556	0.1	0.18	5.67887e-15			MUSCULOSKELETAL_M16	1.26667	0.19	0.15	0.000170018			MUSCULOSKELETAL_M16	0.466667	0.07	0.15	0.101187
MUSCULOSKELETAL_M17	2	0.22	0.11	1.02551e-06			MUSCULOSKELETAL_M17	0.454545	0.05	0.11	3.93445e-11			MUSCULOSKELETAL_M17	1.3	0.13	0.1	0.00381749			MUSCULOSKELETAL_M17	1	0.1	0.1	0.605176
MUSCULOSKELETAL_M18	2.5	0.45	0.18	0			MUSCULOSKELETAL_M18	0.555556	0.1	0.18	6.38288e-12			MUSCULOSKELETAL_M18	1.30769	0.17	0.13	0.000157143			MUSCULOSKELETAL_M18	0.461538	0.06	0.13	0.113969
MUSCULOSKELETAL_M19	2.83333	0.34	0.12	0			MUSCULOSKELETAL_M19	0.416667	0.05	0.12	2.31695e-17			MUSCULOSKELETAL_M19	1.66667	0.15	0.09	4.22991e-09			MUSCULOSKELETAL_M19	0.555556	0.05	0.09	0.2167
MUSCULOSKELETAL_M45	2	0.68	0.34	0			MUSCULOSKELETAL_M45	0.735294	0.25	0.34	1.62258e-09			MUSCULOSKELETAL_M45	1.2963	0.35	0.27	6.19896e-06			MUSCULOSKELETAL_M45	0.851852	0.23	0.27	0.292881
MUSCULOSKELETAL_M46	2.30435	0.53	0.23	0			MUSCULOSKELETAL_M46	0.652174	0.15	0.23	3.73726e-11			MUSCULOSKELETAL_M46	1.16667	0.21	0.18	0.00619175			MUSCULOSKELETAL_M46	1.05556	0.19	0.18	0.670208
MUSCULOSKELETAL_M47	2.28571	0.32	0.14	3.74232e-12			MUSCULOSKELETAL_M47	0.5	0.07	0.14	1.10404e-14			MUSCULOSKELETAL_M47	1.4	0.14	0.1	6.31663e-05			MUSCULOSKELETAL_M47	0.7	0.07	0.1	0.27672
MUSCULOSKELETAL_M48	2.66667	0.32	0.12	4.6229e-15			MUSCULOSKELETAL_M48	0.583333	0.07	0.12	4.66419e-10			MUSCULOSKELETAL_M48	1.4	0.14	0.1	0.000157143			MUSCULOSKELETAL_M48	0.7	0.07	0.1	0.291876
MUSCULOSKELETAL_M65	2.33333	0.28	0.12	4.7783e-11			MUSCULOSKELETAL_M65	0.416667	0.05	0.12	7.71597e-15			MUSCULOSKELETAL_M65	1.18182	0.13	0.11	0.00928055			MUSCULOSKELETAL_M65	0.545455	0.06	0.11	0.185372
MUSCULOSKELETAL_M67	2.6	0.39	0.15	0			MUSCULOSKELETAL_M67	0.533333	0.08	0.15	2.50778e-12			MUSCULOSKELETAL_M67	1.6	0.16	0.1	1.60493e-06			MUSCULOSKELETAL_M67	0.1	0.01	0.1	0.0134766
MUSCULOSKELETAL_M80	1.80769	0.47	0.26	1.3013e-10			MUSCULOSKELETAL_M80	0.807692	0.21	0.26	0.000288707			MUSCULOSKELETAL_M80	1.14286	0.24	0.21	0.0101593			MUSCULOSKELETAL_M80	0.619048	0.13	0.21	0.117771
MUSCULOSKELETAL_M81	2.5	0.35	0.14	3.82368e-15			MUSCULOSKELETAL_M81	0.428571	0.06	0.14	2.30937e-15			MUSCULOSKELETAL_M81	1.5	0.15	0.1	7.81823e-06			MUSCULOSKELETAL_M81	0.8	0.08	0.1	0.35247
NEOPLASM_C01	2	0.74	0.37	0			NEOPLASM_C01	0.72973	0.27	0.37	3.99158e-10			NEOPLASM_C01	1.06061	0.35	0.33	0.0794796			NEOPLASM_C01	0.606061	0.2	0.33	0.0805383
NEOPLASM_C02	2.1	0.63	0.3	0			NEOPLASM_C02	0.8	0.24	0.3	1.98097e-05			NEOPLASM_C02	1.13043	0.26	0.23	0.0794796			NEOPLASM_C02	1.04348	0.24	0.23	0.605176
NEOPLASM_C09	1.82143	0.51	0.28	2.91699e-11			NEOPLASM_C09	0.642857	0.18	0.28	5.62783e-12			NEOPLASM_C09	1.27273	0.28	0.22	2.50065e-05			NEOPLASM_C09	0.636364	0.14	0.22	0.119116
NEOPLASM_C15	2.26667	0.34	0.15	3.83327e-12			NEOPLASM_C15	0.466667	0.07	0.15	1.80795e-17			NEOPLASM_C15	1.38462	0.18	0.13	3.29257e-05			NEOPLASM_C15	0.769231	0.1	0.13	0.291876
NEOPLASM_C18	2.1	0.21	0.1	5.27204e-07			NEOPLASM_C18	0.5	0.05	0.1	8.70076e-13			NEOPLASM_C18	1.4	0.14	0.1	0.000497066			NEOPLASM_C18	0.7	0.07	0.1	0.253243
NEOPLASM_C20	2.61538	0.34	0.13	1.04443e-15			NEOPLASM_C20	0.461538	0.06	0.13	1.72546e-14			NEOPLASM_C20	1.41667	0.17	0.12	6.19896e-06			NEOPLASM_C20	0.416667	0.05	0.12	0.102198
NEOPLASM_C25	2.36842	0.45	0.19	0			NEOPLASM_C25	0.526316	0.1	0.19	4.5802e-15			NEOPLASM_C25	1.375	0.22	0.16	7.031e-06			NEOPLASM_C25	0.625	0.1	0.16	0.167161
NEOPLASM_C34	2.45455	0.27	0.11	2.09164e-11			NEOPLASM_C34	0.636364	0.07	0.11	2.4468e-06			NEOPLASM_C34	1.3	0.13	0.1	0.00192606			NEOPLASM_C34	0.4	0.04	0.1	0.115453
NEOPLASM_C43	3.05556	0.55	0.18	0			NEOPLASM_C43	0.388889	0.07	0.18	3.54758e-22			NEOPLASM_C43	1.54545	0.17	0.11	2.29027e-07			NEOPLASM_C43	0.636364	0.07	0.11	0.22635
NEOPLASM_C44	2.40741	0.65	0.27	0			NEOPLASM_C44	0.666667	0.18	0.27	1.8206e-10			NEOPLASM_C44	1.30435	0.3	0.23	1.21067e-05			NEOPLASM_C44	1.21739	0.28	0.23	0.838866
NEOPLASM_C45	2.26667	0.68	0.3	0			NEOPLASM_C45	0.633333	0.19	0.3	1.61462e-14			NEOPLASM_C45	1.32	0.33	0.25	6.28831e-07			NEOPLASM_C45	0.84	0.21	0.25	0.305285
NEOPLASM_C48	1.66667	0.55	0.33	3.12988e-09			NEOPLASM_C48	0.666667	0.22	0.33	1.827e-13			NEOPLASM_C48	1.26087	0.29	0.23	0.000292499			NEOPLASM_C48	0.956522	0.22	0.23	0.455285
NEOPLASM_C49	1.96296	0.53	0.27	1.75987e-13			NEOPLASM_C49	0.592593	0.16	0.27	1.60459e-16			NEOPLASM_C49	1.30435	0.3	0.23	3.43981e-05			NEOPLASM_C49	0.608696	0.14	0.23	0.106611
NEOPLASM_C50	1.69231	0.22	0.13	5.70196e-05			NEOPLASM_C50	0.538462	0.07	0.13	5.98428e-11			NEOPLASM_C50	1	0.15	0.15	0.580491			NEOPLASM_C50	0.866667	0.13	0.15	0.352967
NEOPLASM_C64	2.375	0.38	0.16	5.81898e-15			NEOPLASM_C64	0.4375	0.07	0.16	1.27895e-17			NEOPLASM_C64	1.25	0.2	0.16	0.00135752			NEOPLASM_C64	0.5	0.08	0.16	0.101187
NEOPLASM_C67	2.5	0.35	0.14	2.01426e-15			NEOPLASM_C67	0.5	0.07	0.14	1.35927e-12			NEOPLASM_C67	1.4	0.14	0.1	0.000961062			NEOPLASM_C67	0.5	0.05	0.1	0.119116
NEOPLASM_C69	1.67742	0.52	0.31	3.00406e-09			NEOPLASM_C69	0.645161	0.2	0.31	1.57673e-14			NEOPLASM_C69	1.11538	0.29	0.26	0.0298206			NEOPLASM_C69	0.807692	0.21	0.26	0.24922
NEOPLASM_C71	2.58333	0.62	0.24	0			NEOPLASM_C71	0.5	0.12	0.24	5.29288e-20			NEOPLASM_C71	1.36842	0.26	0.19	2.21475e-06			NEOPLASM_C71	0.578947	0.11	0.19	0.111499
NEOPLASM_C73	2.63636	0.58	0.22	0			NEOPLASM_C73	0.545455	0.12	0.22	8.05801e-17			NEOPLASM_C73	1.33333	0.24	0.18	4.91434e-06			NEOPLASM_C73	0.666667	0.12	0.18	0.184677
NEOPLASM_C77	3.0625	0.49	0.16	0			NEOPLASM_C77	0.3125	0.05	0.16	1.779e-27			NEOPLASM_C77	1.5	0.15	0.1	1.33116e-06			NEOPLASM_C77	0.1	0.01	0.1	0.0134766
NEOPLASM_C80	2.19048	0.46	0.21	5.68542e-15			NEOPLASM_C80	0.571429	0.12	0.21	6.42271e-16			NEOPLASM_C80	1.35294	0.23	0.17	3.29257e-05			NEOPLASM_C80	0.764706	0.13	0.17	0.248518
NEOPLASM_C81	1.96552	0.57	0.29	2.68095e-14			NEOPLASM_C81	0.689655	0.2	0.29	8.95704e-11			NEOPLASM_C81	1.16667	0.28	0.24	0.00439607			NEOPLASM_C81	0.75	0.18	0.24	0.226388
NEOPLASM_C82	2.18182	0.48	0.22	2.81997e-16			NEOPLASM_C82	0.545455	0.12	0.22	5.67887e-15			NEOPLASM_C82	1.29412	0.22	0.17	2.61829e-05			NEOPLASM_C82	0.647059	0.11	0.17	0.186209
NEOPLASM_C83	2.61111	0.47	0.18	0			NEOPLASM_C83	0.444444	0.08	0.18	4.38095e-18			NEOPLASM_C83	1.15385	0.15	0.13	0.0338701			NEOPLASM_C83	0.461538	0.06	0.13	0.113969
NEOPLASM_D04	2.15789	0.41	0.19	1.07347e-13			NEOPLASM_D04	0.578947	0.11	0.19	9.08173e-12			NEOPLASM_D04	1.14286	0.16	0.14	0.0740351			NEOPLASM_D04	0.785714	0.11	0.14	0.305285
NEOPLASM_D05	2.375	0.38	0.16	2.49301e-14			NEOPLASM_D05	0.5625	0.09	0.16	1.13641e-11			NEOPLASM_D05	1.46154	0.19	0.13	6.19896e-06			NEOPLASM_D05	0.538462	0.07	0.13	0.119116
NEOPLASM_D07	2.2	0.44	0.2	2.05088e-14			NEOPLASM_D07	0.6	0.12	0.2	1.01022e-13			NEOPLASM_D07	1.23529	0.21	0.17	0.00113575			NEOPLASM_D07	0.823529	0.14	0.17	0.324711
NEOPLASM_D09	2	0.66	0.33	0			NEOPLASM_D09	0.69697	0.23	0.33	2.87645e-11			NEOPLASM_D09	1.28571	0.36	0.28	4.51525e-06			NEOPLASM_D09	0.75	0.21	0.28	0.213617
NEOPLASM_D11	1.95238	0.41	0.21	1.02965e-10			NEOPLASM_D11	0.47619	0.1	0.21	1.07779e-21			NEOPLASM_D11	1.125	0.18	0.16	0.0249445			NEOPLASM_D11	0.6875	0.11	0.16	0.22635
NEOPLASM_D12	2	0.22	0.11	1.48488e-06			NEOPLASM_D12	0.636364	0.07	0.11	3.69513e-06			NEOPLASM_D12	1.27273	0.14	0.11	0.00287113			NEOPLASM_D12	0.727273	0.08	0.11	0.286924
NEOPLASM_D13	2.76471	0.47	0.17	0			NEOPLASM_D13	0.529412	0.09	0.17	2.1943e-15			NEOPLASM_D13	1.42857	0.2	0.14	4.34523e-07			NEOPLASM_D13	0.714286	0.1	0.14	0.270864
NEOPLASM_D14	1.96	0.49	0.25	2.49667e-12			NEOPLASM_D14	0.68	0.17	0.25	1.68036e-11			NEOPLASM_D14	1.33333	0.32	0.24	1.35046e-06			NEOPLASM_D14	0.583333	0.14	0.24	0.101187
NEOPLASM_D16	2.38462	0.62	0.26	0			NEOPLASM_D16	0.576923	0.15	0.26	6.18189e-16			NEOPLASM_D16	1.21053	0.23	0.19	0.00192606			NEOPLASM_D16	1.10526	0.21	0.19	0.732935
NEOPLASM_D17	2.93333	0.44	0.15	0			NEOPLASM_D17	0.333333	0.05	0.15	2.9283e-22			NEOPLASM_D17	1.44444	0.13	0.09	0.00123504			NEOPLASM_D17	0.333333	0.03	0.09	0.091175
NEOPLASM_D18	2.64706	0.45	0.17	0			NEOPLASM_D18	0.470588	0.08	0.17	1.17481e-16			NEOPLASM_D18	1.41667	0.17	0.12	0.000157143			NEOPLASM_D18	0.416667	0.05	0.12	0.091175
NEOPLASM_D21	2.65	0.53	0.2	0			NEOPLASM_D21	0.5	0.1	0.2	1.4983e-16			NEOPLASM_D21	1.33333	0.24	0.18	3.151e-06			NEOPLASM_D21	0.333333	0.06	0.18	0.0202357
NEOPLASM_D22	2.38462	0.31	0.13	3.44068e-12			NEOPLASM_D22	0.461538	0.06	0.13	5.02504e-13			NEOPLASM_D22	1.4	0.14	0.1	0.000292499			NEOPLASM_D22	0.2	0.02	0.1	0.033705
NEOPLASM_D23	2	0.24	0.12	1.23176e-07			NEOPLASM_D23	0.333333	0.04	0.12	3.46885e-18			NEOPLASM_D23	1.44444	0.13	0.09	0.000329163			NEOPLASM_D23	0.666667	0.06	0.09	0.26492
NEOPLASM_D24	2.93333	0.44	0.15	0			NEOPLASM_D24	0.466667	0.07	0.15	1.21078e-15			NEOPLASM_D24	1.33333	0.16	0.12	0.000741663			NEOPLASM_D24	0.833333	0.1	0.12	0.366318
NEOPLASM_D35	2.52941	0.43	0.17	0			NEOPLASM_D35	0.470588	0.08	0.17	2.34166e-16			NEOPLASM_D35	1.46154	0.19	0.13	7.81823e-06			NEOPLASM_D35	0.307692	0.04	0.13	0.033705
NEOPLASM_D37	2.84615	0.37	0.13	0			NEOPLASM_D37	0.461538	0.06	0.13	5.48942e-16			NEOPLASM_D37	1.36364	0.15	0.11	0.000380707			NEOPLASM_D37	0.727273	0.08	0.11	0.280405
NEOPLASM_D38	1.6	0.56	0.35	2.94825e-08			NEOPLASM_D38	0.8	0.28	0.35	8.38665e-06			NEOPLASM_D38	1.13793	0.33	0.29	0.0237022			NEOPLASM_D38	0.724138	0.21	0.29	0.151861
NEOPLASM_D41	2.47059	0.42	0.17	0			NEOPLASM_D41	0.470588	0.08	0.17	1.01239e-15			NEOPLASM_D41	1.35714	0.19	0.14	0.000291286			NEOPLASM_D41	0.571429	0.08	0.14	0.119116
NEOPLASM_D43	1.71795	0.67	0.39	2.13433e-11			NEOPLASM_D43	0.794872	0.31	0.39	1.69014e-07			NEOPLASM_D43	1.12903	0.35	0.31	0.012271			NEOPLASM_D43	0.903226	0.28	0.31	0.35247
NEOPLASM_D45	2.26087	0.52	0.23	0			NEOPLASM_D45	0.652174	0.15	0.23	9.67324e-13			NEOPLASM_D45	1.14286	0.24	0.21	0.0110602			NEOPLASM_D45	0.619048	0.13	0.21	0.119116
NEOPLASM_D46	2	0.6	0.3	0			NEOPLASM_D46	0.6	0.18	0.3	3.16245e-15			NEOPLASM_D46	1.26087	0.29	0.23	4.69078e-05			NEOPLASM_D46	0.73913	0.17	0.23	0.213617
NEOPLASM_D48	2.58824	0.44	0.17	0			NEOPLASM_D48	0.529412	0.09	0.17	6.36414e-14			NEOPLASM_D48	1.30769	0.17	0.13	0.000817927			NEOPLASM_D48	0.769231	0.1	0.13	0.294552
RESPIRATORY_J20	1.75676	0.65	0.37	1.90093e-12			RESPIRATORY_J20	0.756757	0.28	0.37	5.06888e-08			RESPIRATORY_J20	1.11111	0.4	0.36	0.0148643			RESPIRATORY_J20	1.08333	0.39	0.36	0.747127
RESPIRATORY_J22	2.66667	0.32	0.12	0			RESPIRATORY_J22	0.416667	0.05	0.12	2.17194e-16			RESPIRATORY_J22	1.44444	0.13	0.09	3.16311e-05			RESPIRATORY_J22	0.555556	0.05	0.09	0.22635
RESPIRATORY_J40	1.82609	0.42	0.23	6.41267e-09			RESPIRATORY_J40	0.73913	0.17	0.23	1.5723e-07			RESPIRATORY_J40	1.13636	0.25	0.22	0.0153642			RESPIRATORY_J40	1	0.22	0.22	0.600392
RESPIRATORY_J44	2.53846	0.33	0.13	1.19306e-14			RESPIRATORY_J44	0.461538	0.06	0.13	5.02504e-13			RESPIRATORY_J44	1.4	0.14	0.1	4.23029e-06			RESPIRATORY_J44	0.4	0.04	0.1	0.115453
RESPIRATORY_J47	2.22222	0.4	0.18	1.61345e-13			RESPIRATORY_J47	0.5	0.09	0.18	1.12416e-17			RESPIRATORY_J47	1.21429	0.17	0.14	0.00234986			RESPIRATORY_J47	0.857143	0.12	0.14	0.427736
RESPIRATORY_J84	2.28571	0.48	0.21	0			RESPIRATORY_J84	0.571429	0.12	0.21	2.45682e-13			RESPIRATORY_J84	1.41176	0.24	0.17	1.35046e-06			RESPIRATORY_J84	0.529412	0.09	0.17	0.111499

## Sheet: Effect-Size-Dists
Significance-Thresholded SNPs
trait	Mean Effect Size – FETALBIASED	SD Effect Size – FETALBIASED	Mean Effect Size – ADULTBIASED	SD Effect Size – ADULTBIASED	W_stat	W_Pval	padj	Direction
CV.I48	4.23055	24.3101	7.43715	30.6087	261798	1.61297e-13	2.03234e-11	UPADULT
NEOPLASM.C50	3.82154	19.8896	7.39734	31.6362	114564	2.1464e-10	1.35223e-08	UPADULT
CV.I83	2.67531	14.3173	5.81938	27.8842	180853	2.40386e-05	0.000865175	UPADULT
DIABETES.E10	0.435721	4.1053	0.533971	4.52621	1951064	2.74659e-05	0.000865175	UPADULT
NEOPLASM.D04	0.708055	2.44447	2.91143	19.2329	73452.5	0.000216628	0.00545904	UPADULT
CV.I86	0.334164	1.5176	0.653651	3.71625	162890	0.000264802	0.00556084	UPADULT
CV.I80	4.94291	22.1391	6.17768	23.6631	101409	0.000576255	0.0103726	UPADULT
MUSCULOSKELETAL.M06	1.57357	12.6275	1.41115	9.89438	804516	0.00115352	0.0145344	DOWNADULT
NEOPLASM.D48	2.77368	10.7401	2.76286	13.968	65077	0.00112827	0.0145344	DOWNADULT
RESPIRATORY.J84	0.718565	2.54334	1.44337	10.7164	103120	0.000963298	0.0145344	UPADULT
NEOPLASM.C43	4.99895	17.6975	4.11711	19.8414	119193	0.00161386	0.0184861	DOWNADULT
CV.I30	0.171169	1.00028	0.259639	1.50547	232838	0.00222331	0.0233448	UPADULT
CV.I25	0.898756	9.74515	2.86123	22.6305	419889	0.00457807	0.0436328	UPADULT
MUSCULOSKELETAL.M45	0.119981	1.16212	0.125676	1.4739	1180808	0.00484809	0.0436328	UPADULT
DIABETES.N20	7.88262	24.8682	7.30786	24.8727	77537.5	0.00649579	0.0545646	DOWNADULT
NEOPLASM.C73	1.40844	13.4725	1.00626	4.60643	133720	0.00808346	0.0631987	DOWNADULT
CV.I51	1.17181	12.8466	1.34047	10.5149	145778	0.0085268	0.0631987	UPADULT
NEOPLASM.C01	0.190783	2.3826	0.455536	7.48868	405234	0.0100819	0.0705732	UPADULT
NEOPLASM.D05	3.97682	15.0599	5.81952	20.3779	64148.5	0.012575	0.083392	UPADULT
MUSCULOSKELETAL.M47	10.5916	29.7569	5.2499	14.9157	48207	0.0174394	0.109868	DOWNADULT
CV.I46	0.375107	2.30687	0.647815	5.73351	202086	0.0249139	0.149483	UPADULT
NEOPLASM.D24	4.13406	14.5964	3.36591	9.61193	50702	0.0275796	0.157956	DOWNADULT
NEOPLASM.D11	1.77097	7.18664	1.30215	6.42575	102472	0.0292228	0.16009	DOWNADULT
CV.I35	2.64946	9.48366	4.85931	21.0448	53496	0.0370345	0.194431	UPADULT
CV.I20	11.987	38.2924	8.65153	27.8633	46971.5	0.044605	0.208157	DOWNADULT
CV.I84	23.2488	62.7844	14.3914	45.6302	24722	0.0444739	0.208157	DOWNADULT
MUSCULOSKELETAL.M16	2.62971	19.5233	2.47376	20.3212	846860	0.0426463	0.208157	DOWNADULT
NEOPLASM.C69	0.488756	4.41992	0.463961	3.70386	249740	0.0462859	0.208286	DOWNADULT
CV.I27	0.313559	1.43284	0.372442	2.07271	252898	0.0489203	0.21255	UPADULT
NEOPLASM.D22	5.78957	22.3892	5.31859	17.6984	67204	0.050631	0.21265	DOWNADULT
MUSCULOSKELETAL.M18	3.40113	10.6288	2.66097	8.94102	77054	0.0599355	0.240092	DOWNADULT
CV.I70	1.78719	9.35692	2.65015	9.70359	69788.5	0.0609758	0.240092	UPADULT
MUSCULOSKELETAL.M17	9.51494	35.2471	10.0925	40.9091	44985.5	0.0630467	0.240724	UPADULT
CV.I61	2.64529	8.20228	2.00645	13.0024	70958.5	0.0676064	0.250541	DOWNADULT
DIABETES.E11	3.2741	11.1904	2.3935	7.71566	70810.5	0.0901583	0.30307	DOWNADULT
NEOPLASM.C77	3.96632	19.3438	3.54616	16.2512	55037.5	0.0914021	0.30307	DOWNADULT
DIABETES.N19	0.462104	3.37515	0.610885	3.93154	208714	0.0850153	0.30307	UPADULT
NEOPLASM.C45	0.304984	1.75942	0.391833	1.93475	237400	0.0882478	0.30307	UPADULT
NEOPLASM.D14	1.00274	7.8434	0.722894	4.82009	186766	0.0957012	0.309189	DOWNADULT
NEOPLASM.D16	0.501308	2.56419	1.4306	13.0695	148132	0.107583	0.338885	UPADULT
DIABETES.N17	3.00286	11.406	4.03242	19.0191	63075.5	0.135865	0.417536	UPADULT
BLOOD.D63	0.843634	7.61796	0.620524	4.88473	215173	0.15593	0.433134	DOWNADULT
CV.I73	4.91148	24.335	2.99889	9.58269	56907.5	0.161566	0.433134	DOWNADULT
MUSCULOSKELETAL.M13	5.70592	20.3693	4.60473	19.5094	54484	0.155601	0.433134	DOWNADULT
MUSCULOSKELETAL.M67	8.41309	26.5783	7.08944	23.4339	45797.5	0.160465	0.433134	DOWNADULT
METABOLIC.E83	0.481356	5.70126	0.541203	7.30463	3354150	0.161235	0.433134	UPADULT
MUSCULOSKELETAL.M05	0.460524	3.08607	0.951261	8.89137	465272	0.156011	0.433134	UPADULT
CV.I82	0.487926	4.10846	0.357525	2.83045	236033	0.190673	0.480496	DOWNADULT
DIGESTIVE.K85	9.55595	35.8861	7.21472	23.3118	38567	0.188859	0.480496	DOWNADULT
NEOPLASM.D17	14.5154	44.6282	11.4958	36.9498	43566.5	0.187794	0.480496	DOWNADULT
DIGESTIVE.K29	26.6631	65.613	22.9643	58.2944	12553	0.202903	0.50129	DOWNADULT
MUSCULOSKELETAL.M00	0.881366	3.86529	1.54935	11.2821	126259	0.207193	0.502046	UPADULT
CV.I74	2.17028	7.4558	2.88604	13.4609	55207	0.217239	0.516455	UPADULT
CV.I10	3.09941	10.67	2.63996	9.15461	54786.5	0.233114	0.520907	DOWNADULT
CV.I26	5.44339	24.9051	4.11553	15.5577	79816.5	0.238161	0.520907	DOWNADULT
MUSCULOSKELETAL.M19	13.6093	36.0459	9.19972	25.1401	35352.5	0.244612	0.520907	DOWNADULT
MUSCULOSKELETAL.M46	1.1189	6.3604	0.759977	3.00406	132317	0.236966	0.520907	DOWNADULT
NEOPLASM.C34	3.98797	10.7102	5.68362	17.2886	29701	0.241778	0.520907	UPADULT
NEOPLASM.C80	1.64714	8.19564	2.10719	9.79064	125378	0.248051	0.520907	UPADULT
NEOPLASM.D38	0.125175	0.859341	0.313822	3.12817	319194	0.241149	0.520907	UPADULT
RESPIRATORY.J44	5.39817	23.7505	6.80965	26.1817	39421.5	0.253469	0.523559	UPADULT
BLOOD.D64	8.31101	28.638	6.3224	23.9695	65772.5	0.258645	0.525633	DOWNADULT
NEOPLASM.D23	9.40658	30.2336	8.8345	27.2392	37451.5	0.270531	0.534773	DOWNADULT
NEOPLASM.D45	1.10868	6.86428	0.548032	2.82532	205775	0.272263	0.534773	DOWNADULT
METABOLIC.E23	0.415841	2.13517	0.485846	3.34654	160674	0.275875	0.534773	UPADULT
CV.I50	6.56408	27.8907	5.69156	20.2576	49811.5	0.281999	0.538362	DOWNADULT
NEOPLASM.D21	1.09998	4.89267	1.0273	4.39925	113331	0.294445	0.553733	DOWNADULT
CV.I71	3.50999	18.2381	2.58111	14.2481	79145	0.343077	0.600385	DOWNADULT
DIGESTIVE.K25	6.93851	23.9541	6.71617	23.5536	55164	0.341299	0.600385	DOWNADULT
MUSCULOSKELETAL.M15	5.33248	15.9609	3.74756	12.9393	61914	0.329708	0.600385	DOWNADULT
NEOPLASM.C82	1.68505	13.2426	0.674674	2.92318	226035	0.324287	0.600385	DOWNADULT
MUSCULOSKELETAL.M81	1.84979	7.15967	3.06266	11.1357	42490	0.336646	0.600385	UPADULT
METABOLIC.E03	0.276906	2.26696	0.273634	1.71525	308780	0.371425	0.64109	DOWNADULT
CV.I24	1.95557	7.42703	1.74925	5.91293	72482.5	0.37752	0.642805	DOWNADULT
CV.I12	1.40334	8.17055	0.945713	4.57402	121900	0.399647	0.671407	DOWNADULT
METABOLIC.E87	2.70601	8.23963	3.18703	15.0666	66484	0.40914	0.678311	UPADULT
NEOPLASM.D13	2.66819	10.4063	2.17433	6.81672	75329	0.44624	0.689911	DOWNADULT
NEOPLASM.D46	0.677202	6.55378	0.646274	3.40473	226730	0.436056	0.689911	DOWNADULT
CV.I63	6.58202	16.2096	6.69472	16.9741	33300	0.450231	0.689911	UPADULT
DIABETES.N28	1.34068	8.10148	2.13646	10.2876	83610.5	0.434413	0.689911	UPADULT
MUSCULOSKELETAL.M10	0.822839	4.24079	1.16769	6.64071	127724	0.452396	0.689911	UPADULT
NEOPLASM.C18	6.41063	27.0191	7.32001	24.4348	35630	0.455483	0.689911	UPADULT
NEOPLASM.C67	2.41061	7.19317	5.71951	17.183	45368	0.45092	0.689911	UPADULT
NEOPLASM.C83	2.79024	11.3787	2.86283	14.1284	64184.5	0.459941	0.689911	UPADULT
NEOPLASM.D07	1.51424	6.64288	1.38859	7.60854	103732	0.468765	0.694875	DOWNADULT
RESPIRATORY.J40	0.59834	3.76046	0.70874	5.97276	155226	0.479686	0.702796	UPADULT
MUSCULOSKELETAL.M48	8.34883	21.9555	7.68422	24.9786	37528	0.513452	0.718431	DOWNADULT
MUSCULOSKELETAL.M80	1.04438	12.7486	0.530339	3.44885	198246	0.547376	0.718431	DOWNADULT
CV.I21	8.41174	34.8715	9.94431	36.5425	68965.5	0.546637	0.718431	UPADULT
CV.I85	0.869788	4.24511	1.09152	5.07013	108004	0.503396	0.718431	UPADULT
DIGESTIVE.K26	3.05738	9.55185	3.91983	13.3506	67531.5	0.541628	0.718431	UPADULT
NEOPLASM.C20	5.49382	21.8408	5.73368	25.7795	50796	0.542372	0.718431	UPADULT
NEOPLASM.C64	2.06739	11.4028	3.66127	17.0598	79421	0.501562	0.718431	UPADULT
NEOPLASM.D41	1.76235	7.77844	2.89472	15.3279	68690	0.529772	0.718431	UPADULT
NEOPLASM.D43	0.334704	5.1543	0.352166	4.33315	409564	0.521712	0.718431	UPADULT
RESPIRATORY.J22	12.8843	34.0058	13.7344	37.5174	29375	0.525557	0.718431	UPADULT
NEOPLASM.C44	2.17331	17.0342	1.99695	16.3611	1323896	0.561406	0.729249	DOWNADULT
NEOPLASM.D12	6.07313	30.9651	8.86533	34.1752	104064	0.578837	0.744219	UPADULT
CV.I08	2.53401	16.2287	1.836	9.91207	134141	0.610689	0.777241	DOWNADULT
RESPIRATORY.J47	1.38225	4.94837	1.26519	5.69029	76001	0.626442	0.789317	DOWNADULT
CV.I47	6.49984	18.7828	5.1006	20.0137	58189	0.638773	0.79109	DOWNADULT
NEOPLASM.D35	3.025	11.1993	3.74844	12.5047	67476	0.640406	0.79109	UPADULT
NEOPLASM.C09	0.473154	2.85441	0.723745	8.74028	200886	0.650708	0.796011	UPADULT
DIGESTIVE.K76	2.48273	9.38525	3.07765	14.6044	65438	0.692106	0.838513	UPADULT
CV.I34	3.8939	18.9652	2.3445	8.31357	79909	0.711473	0.853767	DOWNADULT
NEOPLASM.D37	4.17954	20.3281	2.87966	10.4678	47444.5	0.725248	0.862087	DOWNADULT
RESPIRATORY.J20	0.23479	1.81548	0.246433	1.92812	480237	0.738598	0.869751	UPADULT
NEOPLASM.C25	2.46619	12.3456	1.4063	7.55854	99302	0.757148	0.88334	DOWNADULT
CV.I64	2.88451	10.9097	3.89816	18.7639	56435	0.808487	0.934581	UPADULT
CV.I42	1.50273	7.13255	1.35473	6.8488	76907.5	0.845517	0.951614	DOWNADULT
DIABETES.N18	3.06004	11.4515	2.98982	15.1081	59212	0.843419	0.951614	DOWNADULT
CV.I95	1.93202	7.2808	2.8571	12.279	72961.5	0.845879	0.951614	UPADULT
NEOPLASM.D18	4.60736	16.1309	3.7419	14.5745	66695.5	0.886053	0.962437	DOWNADULT
CV.I65	2.85868	16.0988	3.04327	18.732	87557	0.871823	0.962437	UPADULT
CV.I78	0.509236	1.9074	0.884326	4.12552	108292	0.863331	0.962437	UPADULT
NEOPLASM.C81	0.49017	4.4652	0.496289	3.33116	235584	0.881166	0.962437	UPADULT
MUSCULOSKELETAL.M65	7.341	28.7517	7.50435	23.2685	39575	0.897052	0.966056	UPADULT
NEOPLASM.C71	1.36713	7.81977	1.85415	12.7194	132021	0.93187	0.995048	UPADULT
CV.I44	3.35214	13.3884	2.65906	9.66926	59327	0.981051	0.995872	DOWNADULT
NEOPLASM.C15	3.33425	18.1661	2.0669	8.43062	62756	0.949656	0.995872	DOWNADULT
CV.I22	2.53752	11.9288	2.58659	14.3104	83161.5	0.954745	0.995872	UPADULT
CV.I31	1.61069	8.43515	1.69197	7.82414	77459	0.977996	0.995872	UPADULT
CV.I33	0.506811	3.36375	0.949381	9.08303	241442	0.995872	0.995872	UPADULT
NEOPLASM.C02	0.327058	1.68886	0.506542	3.18857	238284	0.964273	0.995872	UPADULT
NEOPLASM.C48	0.245759	1.52992	0.410184	4.42232	269214	0.994537	0.995872	UPADULT
NEOPLASM.C49	0.755274	3.84683	1.04239	9.58494	217756	0.964741	0.995872	UPADULT
All SNPs
trait	Mean Effect Size – FETAL-BIASED	SD Effect Size – FETAL-BIASED	Mean Effect Size – ADULT-BIASED	SD Effect Size – ADULT-BIASED	W_stat	W_Pval	padj	Direction
BLOOD.W	0.000562448	0.119317	0.000535833	0.0778389	3790523798949	1.89768e-103	2.4344e-103	DOWNADULT
BLOOD.W1	0.0064016	0.374473	0.00700647	0.350262	3792264364950	2.90559e-112	4.79234e-112	UPADULT
CV.W	0.00100711	0.224523	0.000930919	0.141307	3789616886652	5.21479e-99	6.30741e-99	DOWNADULT
CV.W1	0.00171782	0.126944	0.00179724	0.11554	3.79503e+12	4.94426e-127	1.61005e-126	UPADULT
CV.W2	0.000737098	0.108926	0.000718742	0.0661406	3.79185e+12	3.88927e-110	5.8802e-110	DOWNADULT
CV.W3	0.00916107	0.475254	0.0138089	0.763045	3.1314e+11	0.00550447	0.00550447	UPADULT
CV.W4	0.00838488	0.470241	0.00978692	0.537354	3.80079e+12	1.08306e-160	1.25044e-159	UPADULT
CV.W5	0.00126138	0.14901	0.00135648	0.180803	3.79203e+12	4.53283e-111	7.28695e-111	UPADULT
CV.W6	0.00114252	0.0918931	0.00120772	0.0787013	3796717773984	1.62847e-136	8.27262e-136	UPADULT
CV.W7	0.0146169	0.638322	0.0162549	0.666699	3.80308e+12	3.02562e-175	6.40423e-174	UPADULT
CV.W8	0.00404183	0.313773	0.00422588	0.227113	3789630567155	4.623e-99	5.6454e-99	UPADULT
CV.W9	0.000384654	0.0240553	0.000421622	0.0352808	3789836538520	4.50694e-100	5.61158e-100	UPADULT
CV.W10	0.000358008	0.0169375	0.000404036	0.0257178	3790688331320	2.92167e-104	3.82528e-104	UPADULT
CV.W11	0.000949823	0.103203	NA	NA	2.86586e+12	6.55721e-98	7.78285e-98	UPADULT
CV.W12	0.000447574	0.0529917	0.000598348	0.149396	3800416472857	2.13662e-158	2.26126e-157	UPADULT
CV.W13	0.00150243	0.22963	0.00146081	0.101836	2633790433179	4.85652e-82	5.05556e-82	DOWNADULT
CV.W14	0.00182635	0.12064	0.00220095	0.23862	3797965975213	1.06725e-143	7.13374e-143	UPADULT
CV.W15	0.00106275	0.0877996	0.00112336	0.0882168	3790569287778	1.06843e-103	1.3846e-103	UPADULT
CV.W16	0.00156621	0.152411	0.00167174	0.123425	3.78655e+12	1.12025e-84	1.19556e-84	UPADULT
CV.W17	0.000455382	0.0363019	0.000545067	0.091087	3.79459e+12	1.31741e-124	3.7437e-124	UPADULT
CV.W18	0.00342197	0.227269	0.00411058	0.305734	2.43194e+12	6.58461e-71	6.63687e-71	UPADULT
CV.W19	0.00960614	0.566791	0.010533	0.550645	3807200608084	6.03549e-203	3.83254e-201	UPADULT
CV.W20	0.00265482	0.30478	0.00288487	0.245264	3790885491525	2.9704e-105	4.0132e-105	UPADULT
CV.W21	0.000780578	0.185574	0.000859703	0.152947	3789644049328	3.81232e-99	4.70063e-99	UPADULT
CV.W22	0.00120729	0.099015	0.00122616	0.157048	3788318954144	8.59029e-93	9.65457e-93	UPADULT
CV.W23	NA	NA	0.00456963	0.222504	1.75645e+12	2.81136e-74	2.85634e-74	DOWNADULT
CV.W24	0.00159628	0.126086	0.00189468	0.222871	3.79068e+12	2.90711e-104	3.82528e-104	UPADULT
CV.W25	0.00122881	0.196799	0.00137298	0.241754	3795193993246	5.94818e-128	1.98795e-127	UPADULT
CV.W26	0.00127156	0.114204	0.0015154	0.12674	3.79285e+12	2.70785e-115	5.29072e-115	UPADULT
CV.W27	0.00147839	0.220111	0.00147625	0.184072	3.79577e+12	3.73835e-131	1.58257e-130	DOWNADULT
CV.W28	0.00180093	0.275489	0.00170516	0.122069	3793104303244	1.24346e-116	2.54709e-116	DOWNADULT
CV.W29	0.00115097	0.0855761	0.00136566	0.163285	3793729089509	5.51811e-120	1.25143e-119	UPADULT
CV.W30	0.000638616	0.0270733	0.000761752	0.059273	3785903083465	7.85409e-82	8.04411e-82	UPADULT
CV.W31	0.00433455	0.328833	0.00486699	0.3374	3.79854e+12	4.69521e-147	3.5076e-146	UPADULT
CV.W32	0.00046825	0.0653213	0.00046191	0.0467396	3.79411e+12	5.1994e-122	1.22282e-121	DOWNADULT
CV.W33	0.0108215	0.431145	0.0122926	0.542693	3.80497e+12	1.16971e-187	4.95178e-186	UPADULT
CV.W34	0.0147709	0.69762	0.0163536	0.660989	3795713851560	8.0993e-131	3.25219e-130	UPADULT
CV.W35	0.000742013	0.0555157	0.000841053	0.071316	3.79565e+12	1.99386e-130	7.67335e-130	UPADULT
CV.W36	NA	NA	0.000625369	0.0576122	1.71848e+12	1.46919e-89	1.60851e-89	DOWNADULT
CV.W37	0.00138794	0.0932137	0.00162496	0.154999	3.79555e+12	6.92699e-130	2.58743e-129	UPADULT
DIABETES.W	0.00127114	0.109877	0.00141491	0.125765	3793178507991	4.70548e-117	9.79665e-117	UPADULT
DIABETES.W1	0.00181889	0.142586	0.00182444	0.105747	3.7939e+12	7.06861e-121	1.63221e-120	UPADULT
DIABETES.W2	0.00186486	0.145134	0.00216666	0.227086	3788586969837	4.41043e-94	5.00111e-94	UPADULT
DIABETES.W3	0.00130912	0.126867	0.00147964	0.185271	3791000114808	8.07878e-106	1.10323e-105	UPADULT
DIABETES.W4	0.000480206	0.052788	0.000548794	0.0632479	3.79267e+12	2.39736e-114	4.47743e-114	UPADULT
DIABETES.W5	0.00557628	0.323512	0.00633559	0.357066	3797364268182	3.31147e-140	1.91162e-139	UPADULT
DIABETES.W6	0.00101929	0.102704	0.0011951	0.131803	3.78815e+12	5.16864e-92	5.75805e-92	UPADULT
DIGESTIVE.W	0.00362107	0.277945	0.00394059	0.292307	3.79531e+12	1.43552e-128	4.92732e-128	UPADULT
DIGESTIVE.W1	0.00235461	0.126573	0.00277194	0.178762	3788708023993	1.20343e-94	1.3769e-94	UPADULT
DIGESTIVE.W2	0.0150837	0.696591	0.0167544	0.663057	3794359846038	2.13258e-123	5.52729e-123	UPADULT
DIGESTIVE.W3	0.00131583	0.111635	0.00151912	0.180357	3793437082308	1.96447e-118	4.22861e-118	UPADULT
DIGESTIVE.W4	0.00280311	0.355862	0.00295403	0.258916	3800308365642	9.33631e-158	9.12085e-157	UPADULT
METABOLIC.W	0.00175094	0.183117	0.00190939	0.220148	3790749242556	1.40499e-104	1.87825e-104	UPADULT
METABOLIC.W1	0.000445034	0.0319029	0.000481679	0.0499136	3.79182e+12	5.51211e-110	8.23575e-110	UPADULT
METABOLIC.W2	0.000361165	0.0383901	0.000378517	0.030502	3.79209e+12	2.2247e-111	3.62227e-111	UPADULT
METABOLIC.W3	0.00156829	0.104524	0.00174019	0.181756	3792889207678	1.62288e-115	3.2204e-115	UPADULT
MUSCULOSKELETAL.W	0.000673025	0.0548708	0.000841409	0.157303	3.79262e+12	4.29016e-114	7.67395e-114	UPADULT
MUSCULOSKELETAL.W1	0.0007403	0.0584001	0.000962129	0.16959	3793040457729	2.39771e-116	4.83349e-116	UPADULT
MUSCULOSKELETAL.W2	0.00274652	0.259945	0.00309573	0.235546	3.79538e+12	6.08537e-129	2.14678e-128	UPADULT
MUSCULOSKELETAL.W3	0.00241573	0.22783	0.00255306	0.229286	3787558401458	2.67853e-89	2.90747e-89	UPADULT
MUSCULOSKELETAL.W4	0.000746041	0.0600415	0.000847785	0.0941935	3.79194e+12	1.21973e-110	1.88909e-110	UPADULT
MUSCULOSKELETAL.W5	0.00267777	0.194876	0.00273178	0.166989	3797183340796	3.75714e-139	2.0746e-138	UPADULT
MUSCULOSKELETAL.W6	0.0113017	0.532466	0.0132078	0.62015	3803538785660	3.19082e-178	1.01308e-176	UPADULT
MUSCULOSKELETAL.W7	0.0139999	0.619187	0.0156515	0.664659	3808951410900	2.36679e-215	3.00583e-213	UPADULT
MUSCULOSKELETAL.W8	0.0018726	0.128471	0.00207699	0.125805	3.79127e+12	3.34148e-107	4.76817e-107	UPADULT
MUSCULOSKELETAL.W9	0.00678457	0.40413	0.00721926	0.336606	3798544924755	4.18803e-147	3.32425e-146	UPADULT
MUSCULOSKELETAL.W10	0.000386262	0.0277947	0.000415912	0.0372363	3.79655e+12	1.75951e-135	8.59453e-135	UPADULT
MUSCULOSKELETAL.W11	0.000753597	0.0865449	0.000747952	0.0466735	3788986837412	5.68394e-96	6.68389e-96	DOWNADULT
MUSCULOSKELETAL.W12	0.00404683	0.324282	0.00396487	0.197613	3.79654e+12	1.86213e-135	8.75892e-135	DOWNADULT
MUSCULOSKELETAL.W13	0.00372059	0.250624	0.00402111	0.283469	3.79348e+12	1.23796e-118	2.75827e-118	UPADULT
MUSCULOSKELETAL.W14	0.00468326	0.325356	0.0050752	0.27842	3791613612506	6.13252e-109	9.05616e-109	UPADULT
MUSCULOSKELETAL.W15	0.00457555	0.313423	0.00490641	0.29736	3791111694327	2.17102e-106	3.02988e-106	UPADULT
MUSCULOSKELETAL.W16	0.000605764	0.186701	0.000543617	0.0549026	3797513680137	4.45074e-141	2.69164e-140	DOWNADULT
MUSCULOSKELETAL.W17	0.00140706	0.0821331	0.0017014	0.129862	3794445579323	7.95262e-124	2.1489e-123	UPADULT
NEOPLASM.W	0.000320944	0.0440976	0.000421213	0.139102	3801376877598	2.28187e-164	3.62247e-163	UPADULT
NEOPLASM.W1	0.00042857	0.0271629	0.000505919	0.0533871	3.78634e+12	9.44147e-84	9.90964e-84	UPADULT
NEOPLASM.W2	0.000466026	0.0427543	0.000564606	0.139812	3794325641075	3.48109e-123	8.84197e-123	UPADULT
NEOPLASM.W3	0.00142291	0.210739	0.00131713	0.102383	3.7945e+12	3.81444e-124	1.05312e-123	DOWNADULT
NEOPLASM.W4	0.00399943	0.301288	0.00443716	0.274337	3.79337e+12	4.60668e-118	9.7508e-118	UPADULT
NEOPLASM.W5	0.00238545	0.243902	0.00259042	0.288718	3794587512846	1.32651e-124	3.7437e-124	UPADULT
NEOPLASM.W6	0.0011584	0.159609	0.00107722	0.100674	3.78648e+12	2.16806e-84	2.29453e-84	DOWNADULT
NEOPLASM.W7	0.0027273	0.133559	0.003133	0.191602	3.79471e+12	2.81332e-125	8.50695e-125	UPADULT
NEOPLASM.W8	0.00317716	0.224856	0.0036332	0.303843	3.79479e+12	1.09489e-125	3.47627e-125	UPADULT
NEOPLASM.W9	0.0115842	0.536773	0.0134347	0.581756	3794774047261	1.22709e-125	3.80097e-125	UPADULT
NEOPLASM.W10	0.000406719	0.0286315	0.000451329	0.0330584	3799426400167	2.03787e-152	1.7254e-151	UPADULT
NEOPLASM.W11	0.000361343	0.0246899	0.000435859	0.0767689	3799893965325	3.02966e-155	2.74834e-154	UPADULT
NEOPLASM.W12	0.000630581	0.0602102	0.000746096	0.15308	3792664890870	2.44529e-114	4.50076e-114	UPADULT
NEOPLASM.W13	0.0107527	0.492823	0.0125628	0.591422	3.79542e+12	3.42907e-129	1.24426e-128	UPADULT
NEOPLASM.W14	0.00153912	0.149026	0.00184023	0.207866	3791102977224	2.29893e-106	3.17352e-106	UPADULT
NEOPLASM.W15	0.00274255	0.105327	0.0035077	0.218854	3.78947e+12	2.66865e-98	3.19735e-98	UPADULT
NEOPLASM.W16	0.000435951	0.0718214	0.000444764	0.0619054	3803200530580	5.23741e-176	1.3303e-174	UPADULT
NEOPLASM.W17	0.000921558	0.1061	0.00110058	0.182678	3801360383755	2.77105e-164	3.91026e-163	UPADULT
NEOPLASM.W18	0.000811015	0.188268	0.000769697	0.0684292	3.79428e+12	5.87969e-123	1.46416e-122	DOWNADULT
NEOPLASM.W19	0.00154928	0.19806	0.00173927	0.197277	3794617163512	9.15774e-125	2.70473e-124	UPADULT
NEOPLASM.W20	0.00100239	0.108941	0.00119922	0.139954	3786788313937	9.18599e-86	9.88662e-86	UPADULT
NEOPLASM.W21	0.000454119	0.0686682	0.00049385	0.0557624	3792345855973	1.052e-112	1.75795e-112	UPADULT
NEOPLASM.W22	0.000998431	0.198122	0.000849252	0.0507023	3785926119973	6.08382e-82	6.28167e-82	DOWNADULT
NEOPLASM.W23	0.00139678	0.131741	0.0016138	0.17669	3.78984e+12	4.28386e-100	5.38664e-100	UPADULT
NEOPLASM.W24	0.000855945	0.0344231	0.00131399	0.252219	3.79345e+12	1.80971e-118	3.96263e-118	UPADULT
NEOPLASM.W25	0.00272362	0.189445	0.00328815	0.265133	3791195550152	8.05802e-107	1.13708e-106	UPADULT
NEOPLASM.W26	0.000889705	0.0882264	0.000922445	0.103441	3791990752307	7.22671e-111	1.14724e-110	UPADULT
NEOPLASM.W27	0.000413524	0.0242458	0.000467899	0.0575578	3794268092741	7.11043e-123	1.73658e-122	UPADULT
NEOPLASM.W28	0.000973699	0.0953488	0.00096768	0.0901033	3796293591321	4.4067e-134	1.99875e-133	DOWNADULT
NEOPLASM.W29	0.0117358	0.578696	0.0133251	0.600478	3.80244e+12	3.61223e-171	6.55361e-170	UPADULT
NEOPLASM.W30	0.00147928	0.129672	0.00153552	0.0930915	3.79262e+12	4.19855e-114	7.61736e-114	UPADULT
NEOPLASM.W31	0.000646452	0.121035	0.00059958	0.07363	3792491858046	1.88356e-113	3.23259e-113	DOWNADULT
NEOPLASM.W32	0.000524414	0.036306	0.000781703	0.197284	3.79143e+12	5.2428e-108	7.56632e-108	UPADULT
NEOPLASM.W33	0.00705629	0.499952	0.00768886	0.46832	3.79271e+12	1.39543e-114	2.64507e-114	UPADULT
NEOPLASM.W34	0.00207461	0.189671	0.00219797	0.185881	3.79607e+12	8.0783e-133	3.53774e-132	UPADULT
NEOPLASM.W35	0.000853651	0.0660728	0.000905015	0.0616375	3792727072215	1.1457e-114	2.20461e-114	UPADULT
NEOPLASM.W36	0.00530442	0.284966	0.00633397	0.298947	3.78776e+12	3.49852e-90	3.86358e-90	UPADULT
NEOPLASM.W37	0.00500151	0.328257	0.00564411	0.326168	3788929539797	1.07691e-95	1.25474e-95	UPADULT
NEOPLASM.W38	0.00224381	0.174444	0.00228784	0.124123	3797077192320	1.49908e-138	7.93264e-138	UPADULT
NEOPLASM.W39	0.00138522	0.134009	0.00162502	0.158331	3.78885e+12	2.43423e-95	2.81043e-95	UPADULT
NEOPLASM.W40	0.00176443	0.222793	0.00172925	0.122227	3791973884951	8.62731e-111	1.35268e-110	DOWNADULT
NEOPLASM.W41	0.000295856	0.0152532	0.000366386	0.0552237	3798183819329	5.76084e-145	4.0646e-144	UPADULT
NEOPLASM.W42	0.0011829	0.0950645	0.0014409	0.18635	3792544186601	1.005e-113	1.77271e-113	UPADULT
NEOPLASM.W43	0.000378116	0.0910761	0.000413582	0.082351	3800980100788	6.59176e-162	8.37154e-161	UPADULT
NEOPLASM.W44	0.000736767	0.10393	0.00065776	0.0458534	3.79248e+12	2.30313e-113	3.89997e-113	DOWNADULT
NEOPLASM.W45	0.000531133	0.102532	0.000551665	0.0558848	3.79192e+12	1.78091e-110	2.72501e-110	UPADULT
NEOPLASM.W46	0.00133515	0.131273	0.00144666	0.17545	3794437810518	8.66851e-124	2.29354e-123	UPADULT
RESPIRATORY.W	0.000352445	0.0356209	0.000358692	0.0364585	3794224114683	1.26303e-122	3.0265e-122	UPADULT
RESPIRATORY.W1	0.00579166	0.361869	0.00649608	0.425539	3.79018e+12	9.42252e-102	1.19666e-101	UPADULT
RESPIRATORY.W2	0.000484597	0.0554748	0.000523418	0.0857732	3.79791e+12	2.16985e-143	1.37786e-142	UPADULT
RESPIRATORY.W3	0.00297195	0.249091	0.00354478	0.300564	3795711187452	8.19449e-131	3.25219e-130	UPADULT
RESPIRATORY.W4	0.000927253	0.0605148	0.00101596	0.0748308	3791566275688	1.09171e-108	1.59364e-108	UPADULT
RESPIRATORY.W5	0.000796698	0.0384149	0.000982416	0.147461	3792497137348	1.74698e-113	3.03928e-113	UPADULT

## Sheet: Per-SNP Comparisons
Development Region Set Testing: Cross-Disease Association Metric
Comparison	Difference	Lower bound of 95%CI	Upper bound of 95% CI	Adjusted p-value	Direction (wrt first item in pair)
FETAL_BIASED-CONTROL	2.55222	2.50834	2.5961	0	greater
NOT_AGE_CHANGED-CONTROL	2.28672	2.24589	2.32755	0	greater
ADULT_BIASED-CONTROL	3.55645	3.51931	3.59358	0	greater
NOT_AGE_CHANGED-FETAL_BIASED	-0.265498	-0.321579	-0.209417	0	less
ADULT_BIASED-FETAL_BIASED	1.00423	0.95078	1.05768	0	greater
ADULT_BIASED-NOT_AGE_CHANGED	1.26973	1.21875	1.32071	0	greater
Development Region Set Testing: Per-SNP phyloP20ways
Comparison	Difference	Lower bound of 95%CI	Upper bound of 95% CI	Adjusted p-value	Direction (wrt first item in pair)
FETAL_BIASED-CONTROL	0.0086247	0.00673184	0.0105176	0	greater
NOT_AGE_CHANGED-CONTROL	-0.0297479	-0.0315094	-0.0279864	0	less
ADULT_BIASED-CONTROL	-0.0528572	-0.0544592	-0.0512552	0	less
NOT_AGE_CHANGED-FETAL_BIASED	-0.0383726	-0.0407919	-0.0359533	0	less
ADULT_BIASED-FETAL_BIASED	-0.0614819	-0.0637876	-0.0591761	0	less
ADULT_BIASED-NOT_AGE_CHANGED	-0.0231093	-0.0253085	-0.02091	0	less
Development Region Set Testing: Per-SNP estimated allele age
Comparison	Difference	Lower bound of 95%CI	Upper bound of 95% CI	Adjusted p-value	Direction (wrt first item in pair)
FETAL_BIASED-CONTROL	-1665.61	-1753.03	-1578.19	0	less
NOT_AGE_CHANGED-CONTROL	-227.658	-309.011	-146.305	3.93985e-12	less
ADULT_BIASED-CONTROL	1576.64	1502.66	1650.63	0	greater
NOT_AGE_CHANGED-FETAL_BIASED	1437.95	1326.22	1549.69	0	greater
ADULT_BIASED-FETAL_BIASED	3242.25	3135.76	3348.74	0	greater
ADULT_BIASED-NOT_AGE_CHANGED	1804.3	1702.73	1905.87	0	greater
Development Region Set Testing: LINSIGHT Scores
Comparison	Difference	Lower bound of 95%CI	Upper bound of 95% CI	Adjusted p-value	Direction (wrt first item in pair)
FETAL_BIASED-CONTROL	0.0303427	0.0301031	0.0305823	0	greater
NOT_AGE_CHANGED-CONTROL	0.00875847	0.00853599	0.00898094	0	greater
ADULT_BIASED-CONTROL	0.000241396	3.77184e-05	0.000445074	0.0124649	greater
NOT_AGE_CHANGED-FETAL_BIASED	-0.0215843	-0.0218905	-0.021278	0	less
ADULT_BIASED-FETAL_BIASED	-0.0301013	-0.0303942	-0.0298085	0	less
ADULT_BIASED-NOT_AGE_CHANGED	-0.00851707	-0.00879612	-0.00823803	0	less
Development + Aging-Altered Region Set Testing: Cross-Disease Association Metric
Comparison	Difference	Lower bound of 95%CI	Upper bound of 95% CI	Adjusted p-value	Direction (wrt first item in pair)
NOT_AGE_CHANGED-FETAL_BIASED*NOCHANGE	0.34953	0.27854	0.420519	0	greater
OLD-BIASED*FETAL_BIASED-FETAL_BIASED*NOCHANGE	-1.50258	-1.68938	-1.31579	0	less
OLD-BIASED*ADULT_BIASED-FETAL_BIASED*NOCHANGE	-0.857958	-0.94059	-0.775326	0	less
OUTSIDE-FETAL_BIASED*NOCHANGE	-1.84556	-1.90318	-1.78794	0	less
ADULT_BIASED*NOCHANGE-FETAL_BIASED*NOCHANGE	1.45694	1.38667	1.52721	0	greater
YOUNG-BIASED*FETAL_BIASED-FETAL_BIASED*NOCHANGE	0.686275	0.595229	0.777321	0	greater
YOUNG-BIASED*ADULT_BIASED-FETAL_BIASED*NOCHANGE	3.25718	3.1358	3.37855	0	greater
OLD-BIASED*FETAL_BIASED-NOT_AGE_CHANGED	-1.85211	-2.03604	-1.66819	0	less
OLD-BIASED*ADULT_BIASED-NOT_AGE_CHANGED	-1.20749	-1.28341	-1.13157	0	less
OUTSIDE-NOT_AGE_CHANGED	-2.19509	-2.24259	-2.14759	0	less
ADULT_BIASED*NOCHANGE-NOT_AGE_CHANGED	1.10741	1.04517	1.16965	0	greater
YOUNG-BIASED*FETAL_BIASED-NOT_AGE_CHANGED	0.336745	0.251745	0.421745	0	greater
YOUNG-BIASED*ADULT_BIASED-NOT_AGE_CHANGED	2.90765	2.79074	3.02456	0	greater
OLD-BIASED*ADULT_BIASED-OLD-BIASED*FETAL_BIASED	0.644627	0.455904	0.83335	7.40519e-14	greater
OUTSIDE-OLD-BIASED*FETAL_BIASED	-0.342976	-0.522165	-0.163787	1.83677e-07	less
ADULT_BIASED*NOCHANGE-OLD-BIASED*FETAL_BIASED	2.95952	2.77588	3.14317	0	greater
YOUNG-BIASED*FETAL_BIASED-OLD-BIASED*FETAL_BIASED	2.18886	1.9963	2.38142	0	greater
YOUNG-BIASED*ADULT_BIASED-OLD-BIASED*FETAL_BIASED	4.75976	4.55115	4.96838	0	greater
OUTSIDE-OLD-BIASED*ADULT_BIASED	-0.987603	-1.0512	-0.924006	0	less
ADULT_BIASED*NOCHANGE-OLD-BIASED*ADULT_BIASED	2.3149	2.23965	2.39014	0	greater
YOUNG-BIASED*FETAL_BIASED-OLD-BIASED*ADULT_BIASED	1.54423	1.44929	1.63917	0	greater
YOUNG-BIASED*ADULT_BIASED-OLD-BIASED*ADULT_BIASED	4.11513	3.99081	4.23946	0	greater
ADULT_BIASED*NOCHANGE-OUTSIDE	3.3025	3.25609	3.34891	0	greater
YOUNG-BIASED*FETAL_BIASED-OUTSIDE	2.53184	2.45763	2.60604	0	greater
YOUNG-BIASED*ADULT_BIASED-OUTSIDE	5.10274	4.99343	5.21205	0	greater
YOUNG-BIASED*FETAL_BIASED-ADULT_BIASED*NOCHANGE	-0.770664	-0.855063	-0.686265	0	less
YOUNG-BIASED*ADULT_BIASED-ADULT_BIASED*NOCHANGE	1.80024	1.68376	1.91671	0	greater
YOUNG-BIASED*ADULT_BIASED-YOUNG-BIASED*FETAL_BIASED	2.5709	2.44083	2.70097	0	greater
Development + Aging-Altered Region Set Testing: Per-SNP phyloP20ways
Comparison	Difference	Lower bound of 95%CI	Upper bound of 95% CI	Adjusted p-value	Direction (wrt first item in pair)
NOT_AGE_CHANGED-FETAL_BIASED*NOCHANGE	-0.0412308	-0.0443301	-0.0381315	0	less
OLD-BIASED*FETAL_BIASED-FETAL_BIASED*NOCHANGE	-0.00430733	-0.0124625	0.00384779	0.750049	less
OLD-BIASED*ADULT_BIASED-FETAL_BIASED*NOCHANGE	-0.0557602	-0.0593678	-0.0521527	0	less
OUTSIDE-FETAL_BIASED*NOCHANGE	-0.0153323	-0.017848	-0.0128166	0	less
ADULT_BIASED*NOCHANGE-FETAL_BIASED*NOCHANGE	-0.0688945	-0.0719623	-0.0658267	0	less
YOUNG-BIASED*FETAL_BIASED-FETAL_BIASED*NOCHANGE	-0.0105856	-0.0145605	-0.0066107	1.21347e-13	less
YOUNG-BIASED*ADULT_BIASED-FETAL_BIASED*NOCHANGE	-0.123995	-0.129294	-0.118695	0	less
OLD-BIASED*FETAL_BIASED-NOT_AGE_CHANGED	0.0369235	0.0288937	0.0449533	0	greater
OLD-BIASED*ADULT_BIASED-NOT_AGE_CHANGED	-0.0145294	-0.0178439	-0.0112149	0	less
OUTSIDE-NOT_AGE_CHANGED	0.0258985	0.0238249	0.0279722	0	greater
ADULT_BIASED*NOCHANGE-NOT_AGE_CHANGED	-0.0276636	-0.0303808	-0.0249465	0	less
YOUNG-BIASED*FETAL_BIASED-NOT_AGE_CHANGED	0.0306452	0.0269343	0.0343562	0	greater
YOUNG-BIASED*ADULT_BIASED-NOT_AGE_CHANGED	-0.0827637	-0.0878678	-0.0776595	0	less
OLD-BIASED*ADULT_BIASED-OLD-BIASED*FETAL_BIASED	-0.0514529	-0.0596922	-0.0432136	0	less
OUTSIDE-OLD-BIASED*FETAL_BIASED	-0.0110249	-0.018848	-0.00320186	0.000514414	less
ADULT_BIASED*NOCHANGE-OLD-BIASED*FETAL_BIASED	-0.0645871	-0.0726048	-0.0565694	0	less
YOUNG-BIASED*FETAL_BIASED-OLD-BIASED*FETAL_BIASED	-0.00627826	-0.0146849	0.00212839	0.313971	less
YOUNG-BIASED*ADULT_BIASED-OLD-BIASED*FETAL_BIASED	-0.119687	-0.128795	-0.110579	0	less
OUTSIDE-OLD-BIASED*ADULT_BIASED	0.040428	0.0376514	0.0432045	0	greater
ADULT_BIASED*NOCHANGE-OLD-BIASED*ADULT_BIASED	-0.0131342	-0.0164193	-0.00984914	0	less
YOUNG-BIASED*FETAL_BIASED-OLD-BIASED*ADULT_BIASED	0.0451746	0.0410298	0.0493195	0	greater
YOUNG-BIASED*ADULT_BIASED-OLD-BIASED*ADULT_BIASED	-0.0682343	-0.0736621	-0.0628065	0	less
ADULT_BIASED*NOCHANGE-OUTSIDE	-0.0535622	-0.0555885	-0.0515359	0	less
YOUNG-BIASED*FETAL_BIASED-OUTSIDE	0.00474669	0.00150719	0.00798619	0.000240237	greater
YOUNG-BIASED*ADULT_BIASED-OUTSIDE	-0.108662	-0.113435	-0.10389	0	less
YOUNG-BIASED*FETAL_BIASED-ADULT_BIASED*NOCHANGE	0.0583089	0.0546242	0.0619936	0	greater
YOUNG-BIASED*ADULT_BIASED-ADULT_BIASED*NOCHANGE	-0.0551	-0.0601851	-0.0500149	0	less
YOUNG-BIASED*ADULT_BIASED-YOUNG-BIASED*FETAL_BIASED	-0.113409	-0.119088	-0.10773	0	less
Development + Aging-Altered Region Set Testing: Per-SNP estimated allele age
Comparison	Difference	Lower bound of 95%CI	Upper bound of 95% CI	Adjusted p-value	Direction (wrt first item in pair)
NOT_AGE_CHANGED-FETAL_BIASED*NOCHANGE	1127.4	985.984	1268.82	0	greater
OLD-BIASED*FETAL_BIASED-FETAL_BIASED*NOCHANGE	-2049.71	-2421.82	-1677.59	0	less
OLD-BIASED*ADULT_BIASED-FETAL_BIASED*NOCHANGE	2465.42	2300.81	2630.04	0	greater
OUTSIDE-FETAL_BIASED*NOCHANGE	1364.16	1249.37	1478.96	0	greater
ADULT_BIASED*NOCHANGE-FETAL_BIASED*NOCHANGE	3505.92	3365.94	3645.91	0	greater
YOUNG-BIASED*FETAL_BIASED-FETAL_BIASED*NOCHANGE	-725.137	-906.511	-543.763	0	less
YOUNG-BIASED*ADULT_BIASED-FETAL_BIASED*NOCHANGE	402.937	161.138	644.736	1.21414e-05	greater
OLD-BIASED*FETAL_BIASED-NOT_AGE_CHANGED	-3177.11	-3543.51	-2810.71	0	less
OLD-BIASED*ADULT_BIASED-NOT_AGE_CHANGED	1338.02	1186.78	1489.26	0	greater
OUTSIDE-NOT_AGE_CHANGED	236.761	142.14	331.383	9.8821e-13	greater
ADULT_BIASED*NOCHANGE-NOT_AGE_CHANGED	2378.52	2254.54	2502.5	0	greater
YOUNG-BIASED*FETAL_BIASED-NOT_AGE_CHANGED	-1852.54	-2021.87	-1683.21	0	less
YOUNG-BIASED*ADULT_BIASED-NOT_AGE_CHANGED	-724.466	-957.367	-491.565	7.17204e-14	less
OLD-BIASED*ADULT_BIASED-OLD-BIASED*FETAL_BIASED	4515.13	4139.17	4891.09	0	greater
OUTSIDE-OLD-BIASED*FETAL_BIASED	3413.87	3056.9	3770.84	0	greater
ADULT_BIASED*NOCHANGE-OLD-BIASED*FETAL_BIASED	5555.63	5189.78	5921.47	0	greater
YOUNG-BIASED*FETAL_BIASED-OLD-BIASED*FETAL_BIASED	1324.57	940.975	1708.16	7.42739e-14	greater
YOUNG-BIASED*ADULT_BIASED-OLD-BIASED*FETAL_BIASED	2452.64	2037.05	2868.23	0	greater
OUTSIDE-OLD-BIASED*ADULT_BIASED	-1101.26	-1227.95	-974.567	0	less
ADULT_BIASED*NOCHANGE-OLD-BIASED*ADULT_BIASED	1040.5	890.6	1190.4	0	greater
YOUNG-BIASED*FETAL_BIASED-OLD-BIASED*ADULT_BIASED	-3190.56	-3379.69	-3001.43	0	less
YOUNG-BIASED*ADULT_BIASED-OLD-BIASED*ADULT_BIASED	-2062.49	-2310.16	-1814.82	0	less
ADULT_BIASED*NOCHANGE-OUTSIDE	2141.76	2049.3	2234.22	0	greater
YOUNG-BIASED*FETAL_BIASED-OUTSIDE	-2089.3	-2237.12	-1941.48	0	less
YOUNG-BIASED*ADULT_BIASED-OUTSIDE	-961.227	-1178.99	-743.465	0	less
YOUNG-BIASED*FETAL_BIASED-ADULT_BIASED*NOCHANGE	-4231.06	-4399.19	-4062.93	0	less
YOUNG-BIASED*ADULT_BIASED-ADULT_BIASED*NOCHANGE	-3102.98	-3335.02	-2870.95	0	less
YOUNG-BIASED*ADULT_BIASED-YOUNG-BIASED*FETAL_BIASED	1128.07	868.961	1387.19	0	greater
Development + Aging-Altered Region Set Testing: LINSIGHT Scores
Comparison	Difference	Lower bound of 95%CI	Upper bound of 95% CI	Adjusted p-value	Direction (wrt first item in pair)
NOT_AGE_CHANGED-FETAL_BIASED*NOCHANGE	-0.0224358	-0.0228326	-0.022039	0	less
OLD-BIASED*FETAL_BIASED-FETAL_BIASED*NOCHANGE	-0.00969565	-0.0107339	-0.00865745	0	less
OLD-BIASED*ADULT_BIASED-FETAL_BIASED*NOCHANGE	-0.0375379	-0.0379983	-0.0370775	0	less
OUTSIDE-FETAL_BIASED*NOCHANGE	-0.0296388	-0.0299606	-0.0293171	0	less
ADULT_BIASED*NOCHANGE-FETAL_BIASED*NOCHANGE	-0.0298994	-0.0302934	-0.0295054	0	less
YOUNG-BIASED*FETAL_BIASED-FETAL_BIASED*NOCHANGE	0.00144774	0.000936426	0.00195905	7.20535e-14	greater
YOUNG-BIASED*ADULT_BIASED-FETAL_BIASED*NOCHANGE	-0.0231	-0.0237967	-0.0224033	0	less
OLD-BIASED*FETAL_BIASED-NOT_AGE_CHANGED	0.0127402	0.011718	0.0137623	0	greater
OLD-BIASED*ADULT_BIASED-NOT_AGE_CHANGED	-0.0151021	-0.0155251	-0.0146791	0	less
OUTSIDE-NOT_AGE_CHANGED	-0.00720299	-0.00746845	-0.00693754	0	less
ADULT_BIASED*NOCHANGE-NOT_AGE_CHANGED	-0.00746359	-0.00781311	-0.00711407	0	less
YOUNG-BIASED*FETAL_BIASED-NOT_AGE_CHANGED	0.0238836	0.0234057	0.0243615	0	greater
YOUNG-BIASED*ADULT_BIASED-NOT_AGE_CHANGED	-0.00066419	-0.00133674	8.35931e-06	0.0557838	less
OLD-BIASED*ADULT_BIASED-OLD-BIASED*FETAL_BIASED	-0.0278423	-0.0288908	-0.0267938	0	less
OUTSIDE-OLD-BIASED*FETAL_BIASED	-0.0199432	-0.0209386	-0.0189478	0	less
ADULT_BIASED*NOCHANGE-OLD-BIASED*FETAL_BIASED	-0.0202038	-0.0212248	-0.0191827	0	less
YOUNG-BIASED*FETAL_BIASED-OLD-BIASED*FETAL_BIASED	0.0111434	0.0100716	0.0122152	0	greater
YOUNG-BIASED*ADULT_BIASED-OLD-BIASED*FETAL_BIASED	-0.0134044	-0.014576	-0.0122327	0	less
OUTSIDE-OLD-BIASED*ADULT_BIASED	0.00789909	0.00754553	0.00825266	0	greater
ADULT_BIASED*NOCHANGE-OLD-BIASED*ADULT_BIASED	0.0076385	0.00721814	0.00805886	0	greater
YOUNG-BIASED*FETAL_BIASED-OLD-BIASED*ADULT_BIASED	0.0389857	0.0384538	0.0395176	0	greater
YOUNG-BIASED*ADULT_BIASED-OLD-BIASED*ADULT_BIASED	0.0144379	0.013726	0.0151498	0	greater
ADULT_BIASED*NOCHANGE-OUTSIDE	-0.000260596	-0.000521858	6.66163e-07	0.0511433	less
YOUNG-BIASED*FETAL_BIASED-OUTSIDE	0.0310866	0.0306689	0.0315043	0	greater
YOUNG-BIASED*ADULT_BIASED-OUTSIDE	0.0065388	0.0059076	0.00717001	0	greater
YOUNG-BIASED*FETAL_BIASED-ADULT_BIASED*NOCHANGE	0.0313472	0.0308716	0.0318227	0	greater
YOUNG-BIASED*ADULT_BIASED-ADULT_BIASED*NOCHANGE	0.0067994	0.0061285	0.0074703	0	greater
YOUNG-BIASED*ADULT_BIASED-YOUNG-BIASED*FETAL_BIASED	-0.0245478	-0.0252936	-0.0238019	0	less

## Sheet: PhastCons Tests + CLINVAR
Genome-wide Variants:
PHAST_MEAN_cross-trait-association-metric	NOT_PHAST_MEAN_cross-trait-association-metric	wilcox_stat	wilcox_pval
15.2014	-0.691688	4485796194444	0
FETALBIASED-associated Variants:
PHAST_MEAN_cross-trait-association-metric	NOT_PHAST_MEAN_cross-trait-association-metric	wilcox_stat	wilcox_pval
11.6593	-0.338808	180864875196	0
ADULTBIASED-associated Variants:
PHAST_MEAN_cross-trait-association-metric	NOT_PHAST_MEAN_cross-trait-association-metric	wilcox_stat	wilcox_pval
29.7299	-0.0446515	122464421857	0
YOUNGBIASED-associated Variants:
PHAST_MEAN_cross-trait-association-metric	NOT_PHAST_MEAN_cross-trait-association-metric	wilcox_stat	wilcox_pval
22.6423	0.383898	4.87359e+10	0
OLDBIASED-associated Variants:
PHAST_MEAN_cross-trait-association-metric	NOT_PHAST_MEAN_cross-trait-association-metric	wilcox_stat	wilcox_pval
14.6303	-0.579413	1.77085e+09	2.90442e-125
CLINVAR Variant Testing:
Type	DIR	stand_p	zscore	target_val	mean_back_val
ZSCORE_25	ENRICH	0	-84.8011	-4.21641	-8.8165
ZSCORE_Mean	ENRICH	0	-645.468	39.6791	-0.127281
ZSCORE_75	ENRICH	0	-1304.32	82.0679	6.7916
PHYLOP_25	ENRICH	0	-55.0481	-0.11075	-0.349212
PHYLOP_Mean	ENRICH	0	-125.044	0.334652	-0.0162159
PHYLOP_75	ENRICH	0	-89.0445	1.024	0.434848
ARGWEAVER_25	DEPLETE	1.93668e-121	23.4042	33022.3	33988
ARGWEAVER_Mean	DEPLETE	0	58.5573	48999.8	56789
ARGWEAVER_75	DEPLETE	0	44.1835	57628.7	67212.4
LINSIGHT25	ENRICH	0	< -1e4	0.0503676	0.0436289
LINSIGHTMean	ENRICH	0	-284.281	0.165547	0.0663468
LINSIGHT75	ENRICH	0	-1164.62	0.155543	0.0513279

[truncated: 3 more sheets: Genewise Rank Testing, Genewise Rank Agg, HDAC Gene Set]
